# Supplementary material for: Chiral guanidine catalyzed cyclization reactions of 1,3-enynes for lactone synthesis: switchable H-bond catalysis
Source: Royal Society of Chemistry journal article supplement (doi:10.1039/d4qo00374h), 2024-01-01

## Supporting Information

### Chiral Guanidine Catalyzed Cyclization Reactions of 1,3-Enynes for Lactone Synthesis: Switchable H-Bond Catalysis

Yongyan Zhang,<sup>†</sup> Lichao Ning,<sup>†</sup> Tianxin Zhu, Zheng Xie, Shunxi Dong, Xiaoming Feng, and Xiaohua Liu\*

Key Laboratory of Green Chemistry & Technology, Ministry of Education, College of Chemistry, Sichuan University, Chengdu 610064, China.

E-mail: [liuxh@scu.edu.cn](mailto:liuxh@scu.edu.cn)

#### Table of Contents

|                                                                                                        |     |
|--------------------------------------------------------------------------------------------------------|-----|
| 1. General Information .....                                                                           | 2   |
| 2. Substrates synthesis .....                                                                          | 2   |
| 3. Typical procedure for the preparation of $\delta$ -lactones .....                                   | 3   |
| 4. Experimental procedure for the scale-up reaction .....                                              | 3   |
| 5. Experimental procedure for further transformations of the products .....                            | 4   |
| 6. Optimazition of the reaction conditions .....                                                       | 4   |
| 7. Control experiments .....                                                                           | 9   |
| 8. Computational details .....                                                                         | 14  |
| 9. Determination of absolute configurations of the compounds <b>D1</b> , <b>E1</b> and <b>G1</b> ..... | 73  |
| 10. Analysis result of 2D NMR spectra of the product <b>E3</b> .....                                   | 76  |
| 11. Characterization of the products .....                                                             | 81  |
| 12. References .....                                                                                   | 147 |
| 13. Copies of NMR spectra for products .....                                                           | 147 |

## 1. General Information

NMR characterization data were collected on Bruker ASCENDTM operating at 400 MHz for  $^1\text{H}$  NMR, 101 MHz for  $^{13}\text{C}$  NMR (with complete proton decoupling), and 376 MHz for  $^{19}\text{F}$  NMR (with complete proton decoupling).  $^1\text{H}$  NMR and  $^{13}\text{C}$  NMR: chemical shifts  $\delta$  were recorded in ppm relative to tetramethylsilane and internally referenced to the residual solvent signal (for  $^1\text{H}$  NMR:  $\text{CDCl}_3 = 7.26$  ppm,  $(\text{CD}_3)_2\text{CO} = 2.05$  ppm; for  $^{13}\text{C}$  NMR:  $\text{CDCl}_3 = 77.16$  ppm,  $(\text{CD}_3)_2\text{CO} = 30.92$  ppm). Data were reported as follows: chemical shift, multiplicity (s = singlet, d = doublet, t = triplet, q = quartet, dd = doublet of doublets, td = triplet of doublets, dt = doublet of triplets, ddd = doublet of doublet of doublets, m = multiplet), coupling constants (Hz), integration. High performance liquid chromatography (HPLC) was performed on Alliance e2695 using Daicel Chiralcel IA, IC, AD-3 at 25 °C with UV detector at 254 nm, supercritical fluid chromatography (SFC) was performed on Acquity UPC<sup>2</sup> with Chiralcel IA-3, IC-3 at 35 °C at 254 nm, enantiomeric ratio (er) were determined in comparison with the authentic racemates by HPLC or SFC. High resolution mass spectra (HRMS) were performed on Thermo Q-Exactive Focus (FTMS+c ESI) and data were reported as (m/z). Infrared spectra (IR) were recorded on Bruker Tensor II spectrometer with Plantium ATR accessory and the peaks are reported as absorption maxima ( $\nu$ ,  $\text{cm}^{-1}$ ). Optical rotations were measured on Rudolph Research Analytic Automatic Polarimeter, and reported as follows:  $[\alpha]_D^{25}$  (c: g/100 mL, in  $\text{CH}_2\text{Cl}_2$ ). Melting point ranges were determined on OptiMelt. X-ray crystallographic data were collected by a Bruker D8 Venture Photon II.

The experiments requiring chiral guanidines,<sup>1</sup> enynes<sup>2</sup> and azlactones<sup>3</sup> were synthesized according to known procedures and purified by recrystallization prior to use. All reactions were performed in sealed oven-dried glass tubes under an atmosphere of nitrogen unless otherwise noted. All of the starting materials were purchased from TCI, Aladdin, Adamas, Acros, Aldrich and other companies, and used without further purification. All the solvents including toluene, tetrahydrofuran, diethyl ether, dichloromethane, chloroform, 1,2-dichloroethane, ethyl acetate, acetonitrile and so on were pre-dried over appropriate desiccants, and distilled prior to use. Reactions were monitored using thin-layer chromatography (TLC) on GF254 silica gel. Visualization of the developed plates was performed under UV light (254 nm) or using iodine, cobalt thiocyanate or  $\text{KMnO}_4$ . The products were purified by flash column chromatography with silicycle 300-400 mesh silica gel.

## 2. Substrates synthesis

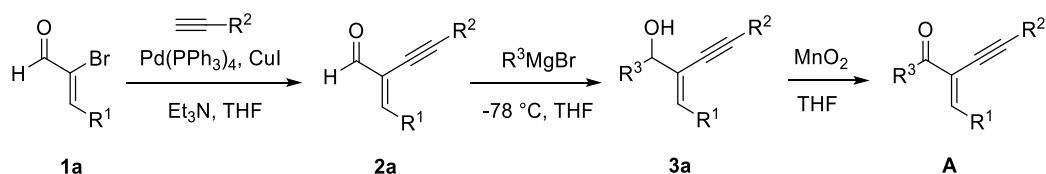

General procedure: **2a** was prepared from **1a** by following a procedure from the literature.<sup>4</sup> To a solution of **2a** (10 mmol) in dry THF (30 mL) cooled to  $-78\text{ }^\circ\text{C}$  was added  $\text{R}^3\text{MgBr}$  (1 M in THF, 12.5 mmol) under nitrogen atmosphere. The reaction was stirred at the same temperature for 1 hour and then stirred overnight at room temperature. Next, quenched with saturated  $\text{NH}_4\text{Cl}$ . The resulting mixture was extracted with  $\text{EtOAc}$ . The organic layer was washed with brine, dried over anhydrous  $\text{MgSO}_4$ , filtered and concentrated under reduced pressure. The residue was dissolved in dry THF (80 mL). To this solution was added  $\text{MnO}_2$  (20 equiv.), followed by stirring at room temperature for 12 h. The reaction mixture was filtered through a short pad of celite, which was rinsed with  $\text{EtOAc}$ . The combined organic layer was concentrated under reduced pressure, and the residue was purified by flash column chromatography.

### 3. Typical procedure for the preparation of $\delta$ -lactones

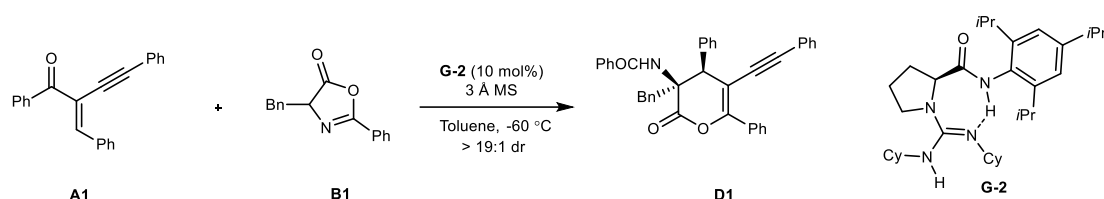

A dry reaction tube was charged with **G-2** (5.2 mg, 10 mol%), 3 Å MS (20 mg), enyne **A1** (30.8 mg, 0.1 mmol) and azlactone **B1** (25.1 mg, 0.1 mmol) under N<sub>2</sub> atmosphere. Then toluene (1.0 mL) was added at -60 °C and the mixture was stirred for 12 h. The reaction mixture was purified by silica gel column chromatographic (ethyl acetate/acetone/petroleum ether 1/5/50) to afford the desired product **D1**. The white solid **D1** was obtained in 89% yield (49.8 mg). The enantiomeric ratio (er) and diastereoisomeric ratio (dr) were determined by UPC<sup>2</sup> with Daicel chiralcel IC-3 (95:5 er, >19:1 dr).

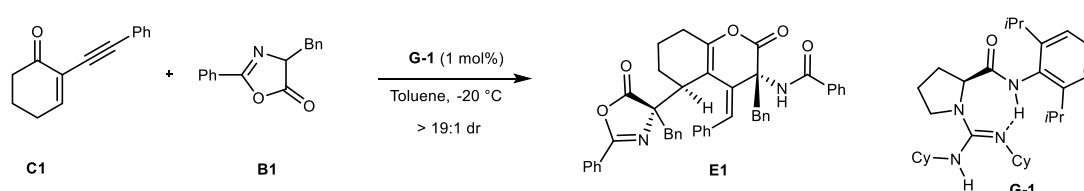

A dry reaction tube was charged with **G-1** (0.5 mg, 1 mol%), enyne **C1** (19.6 mg, 0.1 mmol) and azlactone **B1** (50.2 mg, 0.2 mmol) under N<sub>2</sub> atmosphere. Then toluene (1.0 mL) was added at -20 °C and the mixture was stirred for 15 h. The reaction mixture was purified by silica gel column chromatographic (ethyl acetate/petroleum ether 1/6) to afford the desired product **E1**. The pale yellow solid **E1** was obtained in 99% yield (69.2 mg). The enantiomeric ratio (er) and diastereoisomeric ratio (dr) were determined by HPLC with Daicel chiralcel IC (>99:1 er, >19:1 dr).

### 4. Experimental procedure for the scale-up reaction

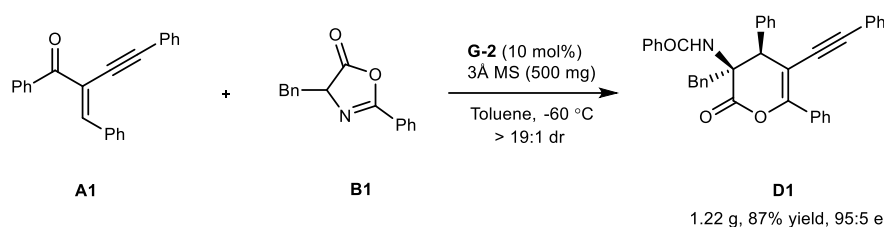

A dry 100 mL round-bottom flask was charged with **G-2** (130 mg, 10 mol%), 3 Å MS (500 mg), enyne **A1** (770 mg, 2.5 mmol) and azlactone **B1** (628 mg, 2.5 mmol) under N<sub>2</sub> atmosphere. Then toluene (25 mL) was added at -60 °C and the mixture was stirred for 24 h. The reaction mixture was concentrated under reduced pressure and then was purified by silica gel column chromatographic (ethyl acetate/acetone/petroleum ether 1/5/50) to afford the desired product. The white solid **D1** was obtained. The enantiomeric ratio (er) and diastereoisomeric ratio (dr) were determined by UPC<sup>2</sup> with Daicel chiralcel IC-3.

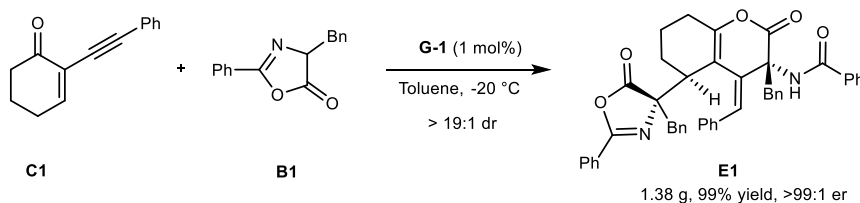

A dry 100 mL round-bottom flask was charged with **G-1** (9.6 mg, 1 mol%), enyne **C1** (392 mg, 2 mmol) and azlactone **B1** (1004 mg, 4 mmol) under N<sub>2</sub> atmosphere. Then toluene (20 mL) was added at -20 °C and the mixture

was stirred for 36 h. The reaction mixture was concentrated under reduced pressure and then was purified by silica gel column chromatographic (ethyl acetate/petroleum ether 1/6) to afford the desired product. The pale yellow solid **E1** was obtained. The enantiomeric ratio (er) and diastereoisomeric ratio (dr) were determined by HPLC with Daicel chiralcel IC.

## 5. Experimental procedure for further transformations of the products

### Procedure 1 The ring opening of the compound **E1**

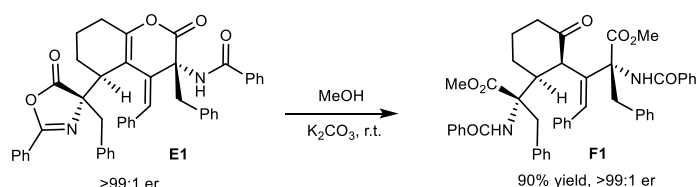

Under  $\text{N}_2$ , 4 mL methanol was added to a mixture of **E1** (140 mg, 0.2 mmol) and  $\text{K}_2\text{CO}_3$  (14.0 mg, 0.1 mmol). It became a clear solution after stirred at room temperature for 60 min. The reaction mixture was concentrated under reduced pressure and then was purified by silica gel column chromatographic (ethyl acetate/petroleum ether 1/3) to afford the desired product. The white solid **F1** was obtained. The enantiomeric ratio (er) and diastereoisomeric ratio (dr) were determined by UPC<sup>2</sup> with Daicel chiralcel AD-3.

### Procedure 2 The reduction of the compound **E15**

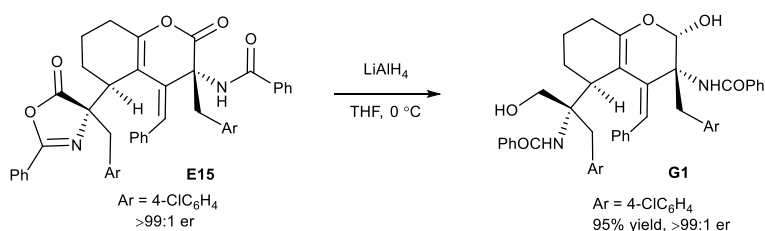

2 mL THF was added to a tube charged with **E15** (153.4 mg, 0.2 mmol). Then  $\text{LiAlH}_4$  (45.6 mg, 1.2 mmol) was added under 0 °C. The mixture was stirring at 0 °C for 10 min. After the reaction was completed, saturated  $\text{NH}_4\text{Cl}$  solution was added, washing aqueous phase with EtOAc three times, separating and concentrating organic phase, the crude product was purified by silica gel column chromatographic (ethyl acetate/petroleum ether 1/3) to afford the desired product. The white solid **G1** was obtained. The enantiomeric ratio (er) and diastereoisomeric ratio (dr) were determined by UPC<sup>2</sup> with Daicel chiralcel IA-3.

## 6. Optimazition of the reaction conditions

### Evaluation of the reaction of acyclicenyne

Table S1 Evaluation of chiral guanidines

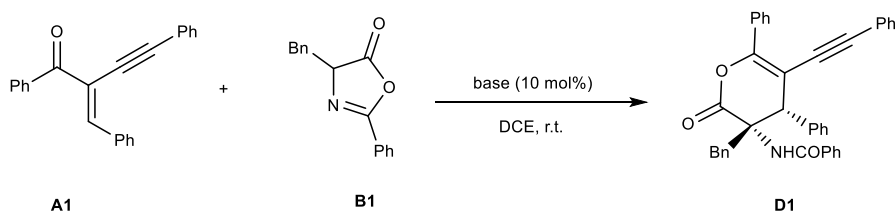



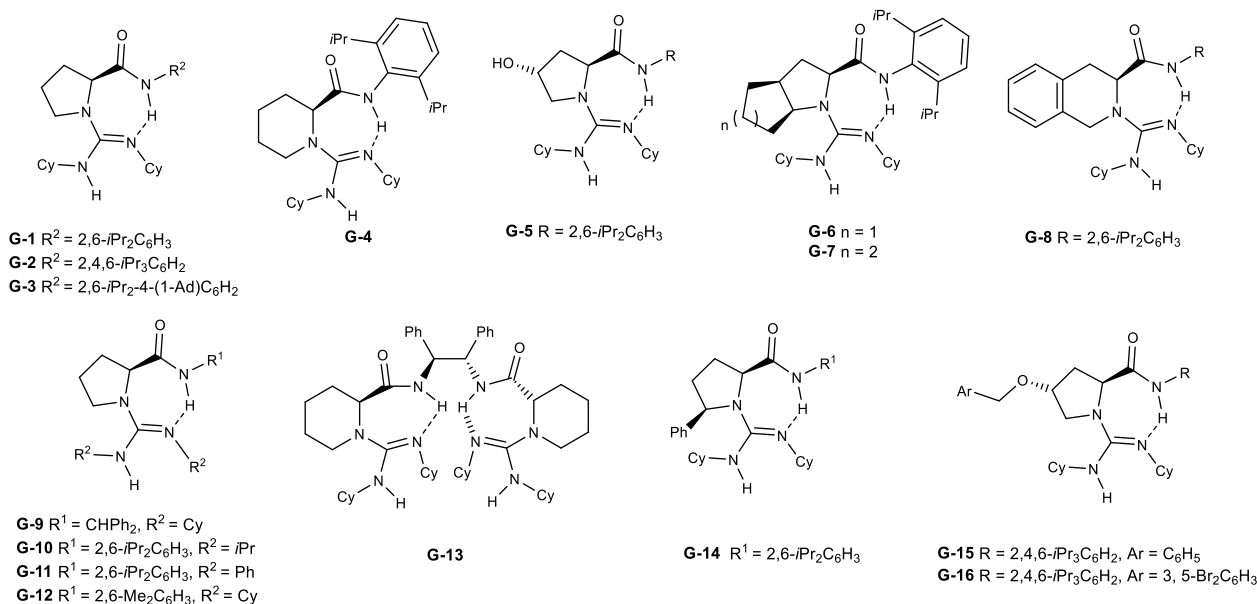

| entry <sup>a</sup> | base                    | yield (%) <sup>b</sup> | er    | dr    |
|--------------------|-------------------------|------------------------|-------|-------|
| 1                  | $\text{K}_2\text{CO}_3$ | NR                     | -     | -     |
| 2                  | <b>G-1</b>              | 79                     | 71:29 | >19:1 |
| 3                  | <b>G-2</b>              | 75                     | 70:30 | >19:1 |
| 4                  | <b>G-3</b>              | 75                     | 71:29 | >19:1 |
| 5                  | <b>G-4</b>              | 65                     | 62:38 | >19:1 |
| 6                  | <b>G-5</b>              | 50                     | 54:46 | >19:1 |
| 7                  | <b>G-6</b>              | 58                     | 58:42 | >19:1 |
| 8                  | <b>G-7</b>              | 69                     | 59:41 | >19:1 |
| 9                  | <b>G-8</b>              | 80                     | 62:38 | >19:1 |
| 10                 | <b>G-9</b>              | 50                     | 53:47 | >19:1 |
| 11                 | <b>G-10</b>             | 81                     | 67:33 | >19:1 |
| 12                 | <b>G-11</b>             | 68                     | 68:32 | >19:1 |
| 13                 | <b>G-12</b>             | 55                     | 54:46 | >19:1 |
| 14                 | <b>G-13</b>             | 38                     | 59:41 | >19:1 |
| 15                 | <b>G-14</b>             | 46                     | 55:45 | >19:1 |

<sup>a</sup>Unless otherwise noted, all reactions were carried out with base (10 mol%), **A1** (0.1 mmol), **B1** (0.1 mmol) in DCE (1.0 mL) at r.t. for 12 h. <sup>b</sup>Isolated yield. The er and dr were determined by UPC<sup>2</sup> analysis on a chiral stationary phase.

**Table S2** Evaluation of solvents

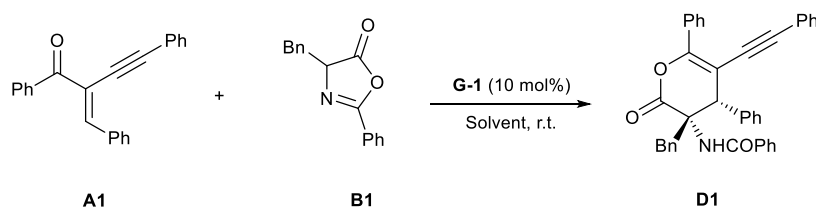

| entry <sup>a</sup> | solvent               | yield (%) <sup>b</sup> | er    | dr    |
|--------------------|-----------------------|------------------------|-------|-------|
| 1                  | THF                   | 49                     | 50:50 | >19:1 |
| 2                  | Toluene               | 68                     | 73:27 | >19:1 |
| 3                  | $\text{Et}_2\text{O}$ | 44                     | 50:50 | >19:1 |
| 4                  | DCE                   | 79                     | 71:29 | >19:1 |
| 5                  | DCM                   | 53                     | 56:44 | >19:1 |
| 6                  | EtOAc                 | 49                     | 52:48 | >19:1 |

<sup>a</sup>Unless otherwise noted, all reactions were carried out with **G-1** (10 mol%), **A1** (0.1 mmol), **B1** (0.1 mmol) in solvent (1.0 mL) at r.t. for 12 h. <sup>b</sup>Isolated yield. The er and dr were determined by UPC<sup>2</sup> analysis on a chiral stationary phase.

**Table S3** Evaluation of additive

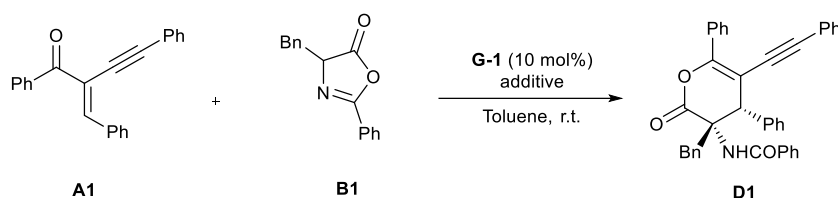

| entry <sup>a</sup> | additive                        | yield (%) <sup>b</sup> | er    | dr    |
|--------------------|---------------------------------|------------------------|-------|-------|
| 1                  | -                               | 68                     | 73:27 | >19:1 |
| 2                  | 3 Å MS                          | 78                     | 73:27 | >19:1 |
| 3                  | 4 Å MS                          | 65                     | 61:39 | >19:1 |
| 4                  | 5 Å MS                          | 79                     | 64:36 | >19:1 |
| 5                  | Na <sub>2</sub> SO <sub>4</sub> | 78                     | 56:44 | >19:1 |

<sup>a</sup>Unless otherwise noted, all reactions were carried out with **G-1** (10 mol%), **A1** (0.1 mmol), additive (20 mg), **B1** (0.1 mmol) in toluene (1.0 mL) at r.t. for 12 h. <sup>b</sup>Isolated yield. The er and dr were determined by UPC<sup>2</sup> analysis on a chiral stationary phase.

**Table S4** Evaluation of temperature

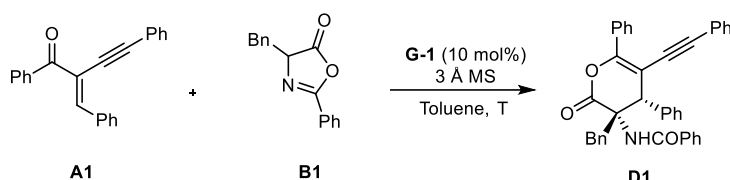

| entry <sup>[a]</sup> | T      | yield (%) <sup>[b]</sup> | er    | dr    |
|----------------------|--------|--------------------------|-------|-------|
| 1                    | r.t.   | 78                       | 73:27 | >19:1 |
| 2                    | 0 °C   | 86                       | 79:21 | >19:1 |
| 3                    | -20 °C | 82                       | 86:14 | >19:1 |
| 4                    | -40 °C | 83                       | 89:11 | >19:1 |
| 5                    | -60 °C | 84                       | 92:8  | >19:1 |
| 6                    | -78 °C | 79                       | 89:11 | >19:1 |
| 7 <sup>c</sup>       | -60 °C | 89                       | 95:5  | >19:1 |
| 8 <sup>d</sup>       | -60 °C | 81                       | 91:9  | >19:1 |

<sup>a</sup>Unless otherwise noted, all reactions were carried out with **G-1** (10 mol%), **A1** (0.1 mmol), 3 Å MS (20 mg), **B1** (0.1 mmol) in toluene (1.0 mL) at T °C for 12 h. <sup>b</sup>Isolated yield. The er and dr were determined by UPC<sup>2</sup> analysis on a chiral stationary phase. <sup>c</sup>use **G-2**. <sup>d</sup>use **G-3**.

**Table S5** Supplementary evaluation of benzene solvents

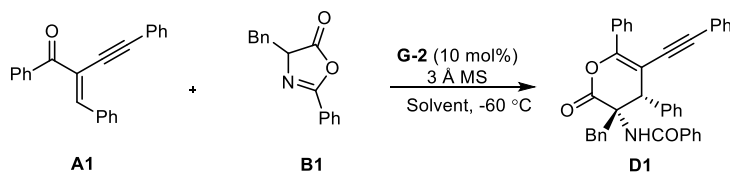

| entry <sup>a</sup> | solvent          | yield (%) <sup>b</sup> | er    | dr    |
|--------------------|------------------|------------------------|-------|-------|
| 1                  | Toluene          | 89                     | 95:5  | >19:1 |
| 2                  | Fluorobenzene    | 73                     | 78:22 | >19:1 |
| 3                  | Chlorobenzene    | 64                     | 83:17 | >19:1 |
| 4                  | Bromobenzene     | 88                     | 82:18 | >19:1 |
| 5                  | <i>o</i> -Xylene | 63                     | 84:16 | >19:1 |
| 6                  | <i>m</i> -Xylene | 72                     | 87:13 | >19:1 |
| 7                  | <i>p</i> -Xylene | 54                     | 78:22 | >19:1 |
| 8                  | Trimethylbenzene | 77                     | 91:9  | >19:1 |

<sup>a</sup>Unless otherwise noted, all reactions were carried out with **G-2** (10 mol%), **A1** (0.1 mmol), 3 Å MS (20 mg), **B1** (0.1 mmol) in benzene solvent (1.0 mL) at -60 °C for 12 h. <sup>b</sup>Isolated yield. The er and dr were determined by UPC<sup>2</sup> analysis on a chiral stationary phase.

**Table S6** Evaluation of the amount of guanidine

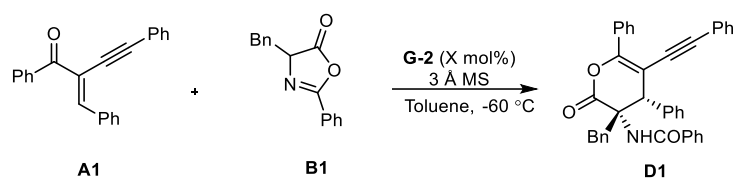

| entry <sup>a</sup> | X   | yield (%) <sup>b</sup> | er   | dr    |
|--------------------|-----|------------------------|------|-------|
| 1                  | 10  | 89                     | 95:5 | >19:1 |
| 2                  | 5   | 78                     | 95:5 | >19:1 |
| 3                  | 2.5 | Trace                  | -    | -     |
| 4                  | 1   | NR                     | -    | -     |

<sup>a</sup>Unless otherwise noted, all reactions were carried out with **G-2** (X mol%), **A1** (0.1 mmol), 3 Å MS (20 mg), **B1** (0.1 mmol) in toluene (1.0 mL) at -60 °C for 12 h. <sup>b</sup>Isolated yield. The er and dr were determined by UPC<sup>2</sup> analysis on a chiral stationary phase.

## Evaluation of the reaction of cyclicenyne

**Table S7** Evaluation of chiral guanidines

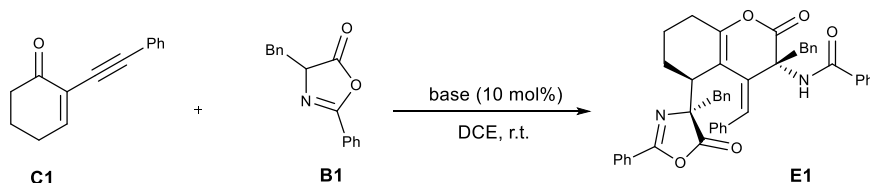

| entry <sup>a</sup> | base                           | yield (%) <sup>b</sup> | er    | dr    |
|--------------------|--------------------------------|------------------------|-------|-------|
| 1                  | K <sub>2</sub> CO <sub>3</sub> | NR                     | -     | -     |
| 2                  | <b>G-1</b>                     | 99                     | 89:11 | >19:1 |
| 3                  | <b>G-2</b>                     | 99                     | 87:13 | >19:1 |
| 4                  | <b>G-3</b>                     | 99                     | 87:13 | >19:1 |
| 5                  | <b>G-4</b>                     | 77                     | 75:25 | >19:1 |
| 6                  | <b>G-5</b>                     | 99                     | 53:47 | >19:1 |
| 7                  | <b>G-6</b>                     | 94                     | 88:12 | >19:1 |
| 8                  | <b>G-7</b>                     | 99                     | 87:13 | >19:1 |
| 9                  | <b>G-8</b>                     | 80                     | 79:21 | >19:1 |

<sup>a</sup>Unless otherwise noted, all reactions were carried out with base (10 mol%), **C1** (0.1 mmol), **B1** (0.2 mmol) in DCE (1.0 mL) at r.t. for 15 h. <sup>b</sup>Isolated yield. The er and dr were determined by HPLC analysis on a chiral stationary phase.

**Table S8** Evaluation of solvents

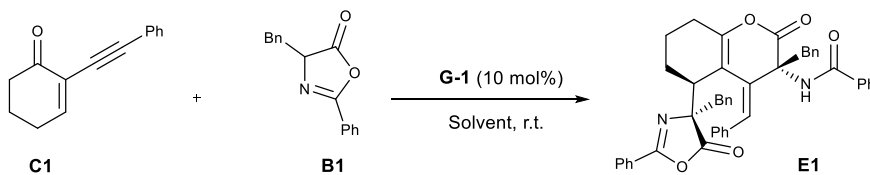

| entry <sup>a</sup> | solvent           | yield (%) <sup>b</sup> | er    | dr    |
|--------------------|-------------------|------------------------|-------|-------|
| 1                  | THF               | 99                     | 88:12 | >19:1 |
| 2                  | Toluene           | 99                     | 91:9  | >19:1 |
| 3                  | Et <sub>2</sub> O | 99                     | 89:11 | >19:1 |
| 4                  | DCE               | 99                     | 89:11 | >19:1 |
| 5                  | DCM               | 99                     | 87:13 | >19:1 |
| 6                  | EtOAc             | 90                     | 91:9  | >19:1 |

<sup>a</sup>Unless otherwise noted, all reactions were carried out with **G-1** (10 mol%), **C1** (0.1 mmol), **B1** (0.2 mmol) in solvent (1.0 mL) at r.t. for 15 h. <sup>b</sup>Isolated yield. The er and dr were determined by HPLC analysis on a chiral stationary phase.

**Table S9** Evaluation of temperature

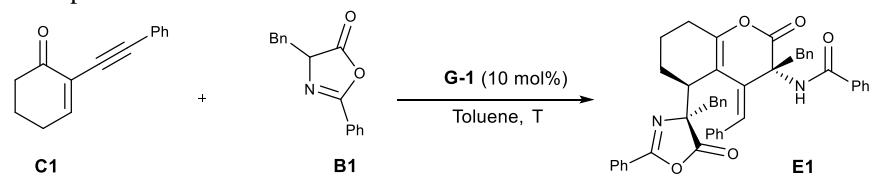

| entry <sup>a</sup> | T      | yield (%) <sup>b</sup> | er    | dr    |
|--------------------|--------|------------------------|-------|-------|
| 1                  | r.t.   | 99                     | 91:9  | >19:1 |
| 2                  | 0 °C   | 99                     | 95:5  | >19:1 |
| 3                  | -20 °C | 99                     | >99:1 | >19:1 |
| 4                  | -40 °C | 90                     | >99:1 | >19:1 |
| 5                  | -60 °C | 88                     | 99:1  | >19:1 |
| 6                  | -78 °C | 82                     | 98:2  | >19:1 |

<sup>a</sup>Unless otherwise noted, all reactions were carried out with **G-1** (10 mol%), **C1** (0.1 mmol), **B1** (0.2 mmol) in toluene (1.0 mL) at T °C for 15 h. <sup>b</sup>Isolated yield. The er and dr were determined by HPLC analysis on a chiral stationary phase.

**Table S10** Evaluation of the amount of guanidine

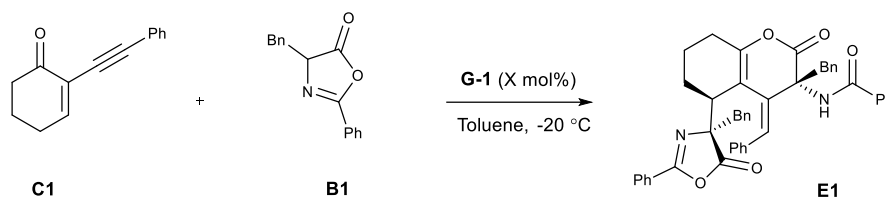

| entry <sup>a</sup> | X   | yield (%) <sup>b</sup> | er    | dr    |
|--------------------|-----|------------------------|-------|-------|
| 1                  | 10  | 99                     | >99:1 | >19:1 |
| 2                  | 5   | 99                     | >99:1 | >19:1 |
| 3                  | 2.5 | 99                     | >99:1 | >19:1 |
| 4                  | 1   | 99                     | >99:1 | >19:1 |
| 5                  | 0.5 | trace                  | -     | -     |
| 6 <sup>c</sup>     | 0.5 | 76                     | >99:1 | >19:1 |

<sup>a</sup>Unless otherwise noted, all reactions were carried out with **G-1** (X mol%), **C1** (0.1 mmol), **B1** (0.2 mmol) in toluene (1.0 mL) at -20 °C for 15 h. <sup>b</sup>Isolated yield. The er and dr were determined by HPLC analysis on a chiral stationary phase. <sup>c</sup>**B1** (0.25 mmol).

### Evaluation of the reaction of acetyl substituted 1,3-enyne

**Table S11** Evaluation of chiral guanidines

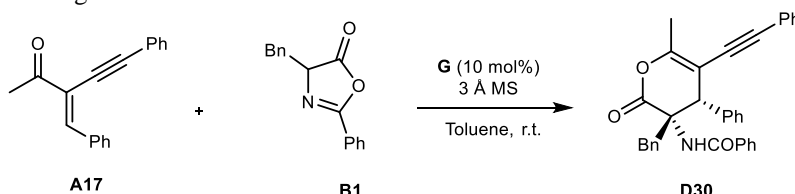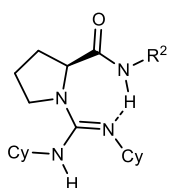

**G-17** R<sup>2</sup> = 2,4,6-Me<sub>3</sub>C<sub>6</sub>H<sub>2</sub>  
**G-18** R<sup>2</sup> = Bn  
**G-19** R<sup>2</sup> = Ts  
**G-20** R<sup>2</sup> = Ad  
**G-21** R<sup>2</sup> = CPh<sub>3</sub>

| entry <sup>a</sup> | G           | yield (%) <sup>b</sup> | er    | dr    |
|--------------------|-------------|------------------------|-------|-------|
| 1 <sup>c</sup>     | <b>G-2</b>  | 25                     | 83:17 | >19:1 |
| 2                  | <b>G-2</b>  | 73                     | 74:26 | >19:1 |
| 3                  | <b>G-1</b>  | 77                     | 73:27 | >19:1 |
| 4                  | <b>G-3</b>  | 64                     | 70:30 | >19:1 |
| 5                  | <b>G-17</b> | 49                     | 53:47 | >19:1 |
| 6                  | <b>G-18</b> | 48                     | 0     | >19:1 |
| 7                  | <b>G-19</b> | 31                     | 0     | >19:1 |
| 8                  | <b>G-20</b> | 64                     | 0     | >19:1 |
| 9                  | <b>G-9</b>  | 72                     | 53:47 | >19:1 |
| 10                 | <b>G-21</b> | 65                     | 59:41 | >19:1 |

<sup>a</sup>Unless otherwise noted, all reactions were carried out with **G** (10 mol%), **A17** (0.1 mmol), **B1** (0.1 mmol) in toluene (1.0 mL) at r.t. for 12 h. <sup>b</sup>Isolated yield. The er and dr were determined by UPC<sup>2</sup> analysis on a chiral stationary phase. <sup>c</sup>at 0 °C.

## 7. Control experiments

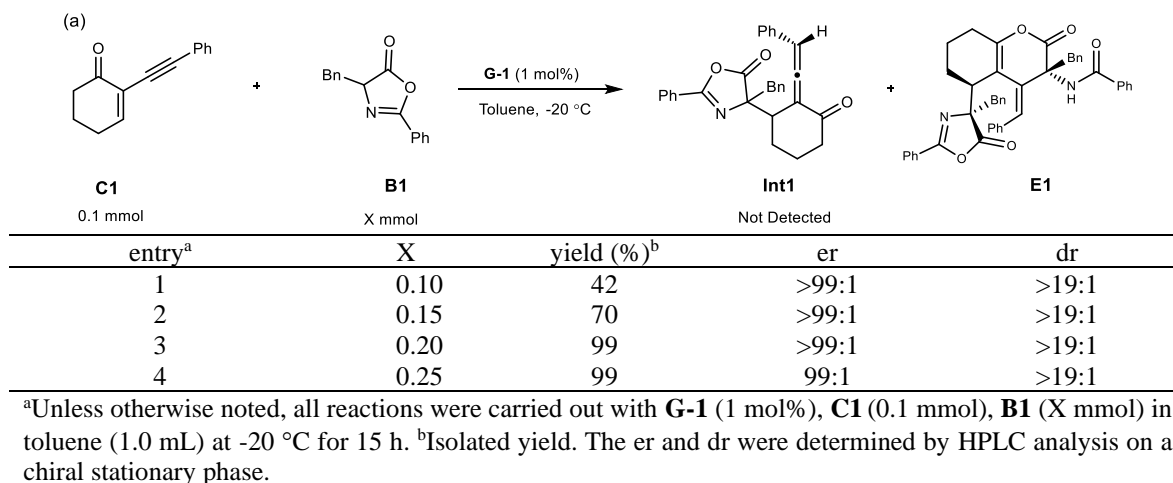

A dry reaction tube was charged with **G-1** (0.5 mg, 1 mol%), enyne **C1** (19.6 mg, 0.1 mmol) and azlactone **B1** (X mmol) under N<sub>2</sub> atmosphere. Then toluene (1.0 mL) was added at -20 °C and the mixture was stirred for 15 h. The generation of **Int1** was not monitored in the reaction.

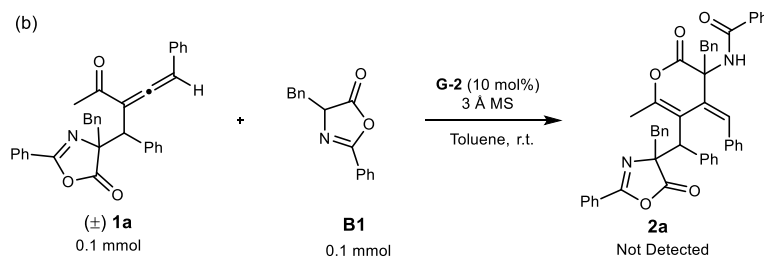

A dry reaction tube was charged with **G-2** (5.2 mg, 10 mol%), (±) **1a** (49.7 mg, 0.1 mmol), azlactone **B1** (25.1 mg, 0.1 mmol) and 3 Å MS (20 mg) under N<sub>2</sub> atmosphere. Then toluene (1.0 mL) was added at r.t. and **B1** was consumed in 1.5 hours to form dimer byproduct, but the generation of **2a** was not monitored in the reaction.

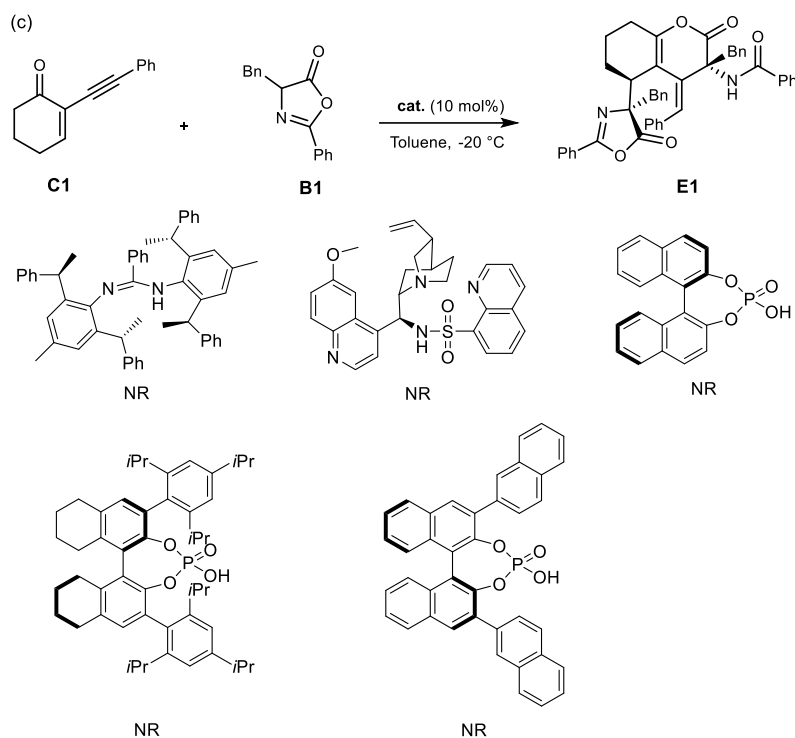

A dry reaction tube was charged with **cat.** (10 mol%), enyne **C1** (19.6 mg, 0.1 mmol) and azlactone **B1** (50.2 mg, 0.2 mmol) under N<sub>2</sub> atmosphere. Then toluene (1.0 mL) was added at -20 °C and the mixture was stirred for 14 h. The generation of **E1** was not monitored with **C1** and **B1** maintaining in the system.

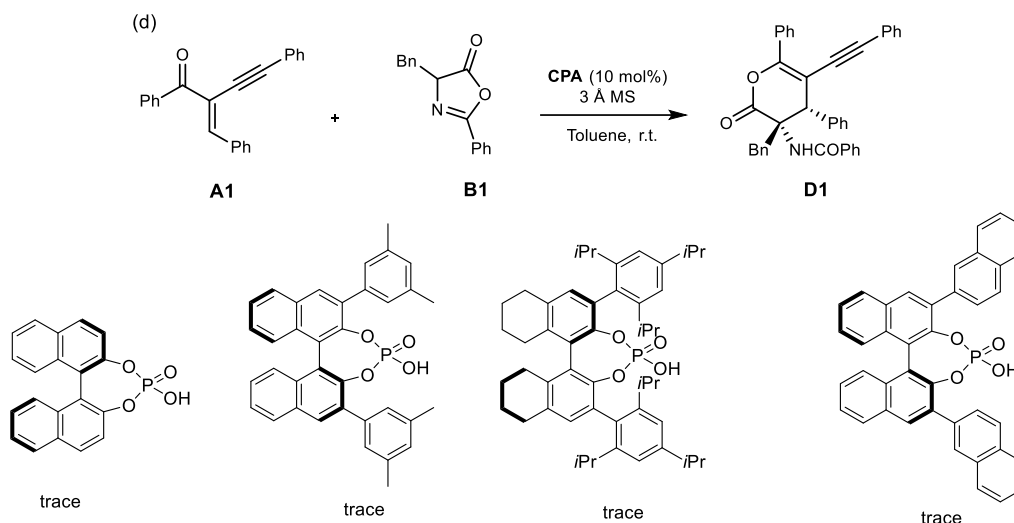

A dry reaction tube was charged with **CPA** (10 mol%), enyne **A1** (30.8 mg, 0.1 mmol), azlactone **B1** (25.1 mg, 0.1 mmol) and 3Å MS (20 mg) under N<sub>2</sub> atmosphere. Then toluene (1.0 mL) was added at r.t. and the mixture was stirred for 12 h. Only trace amounts of **D1** were obtained.

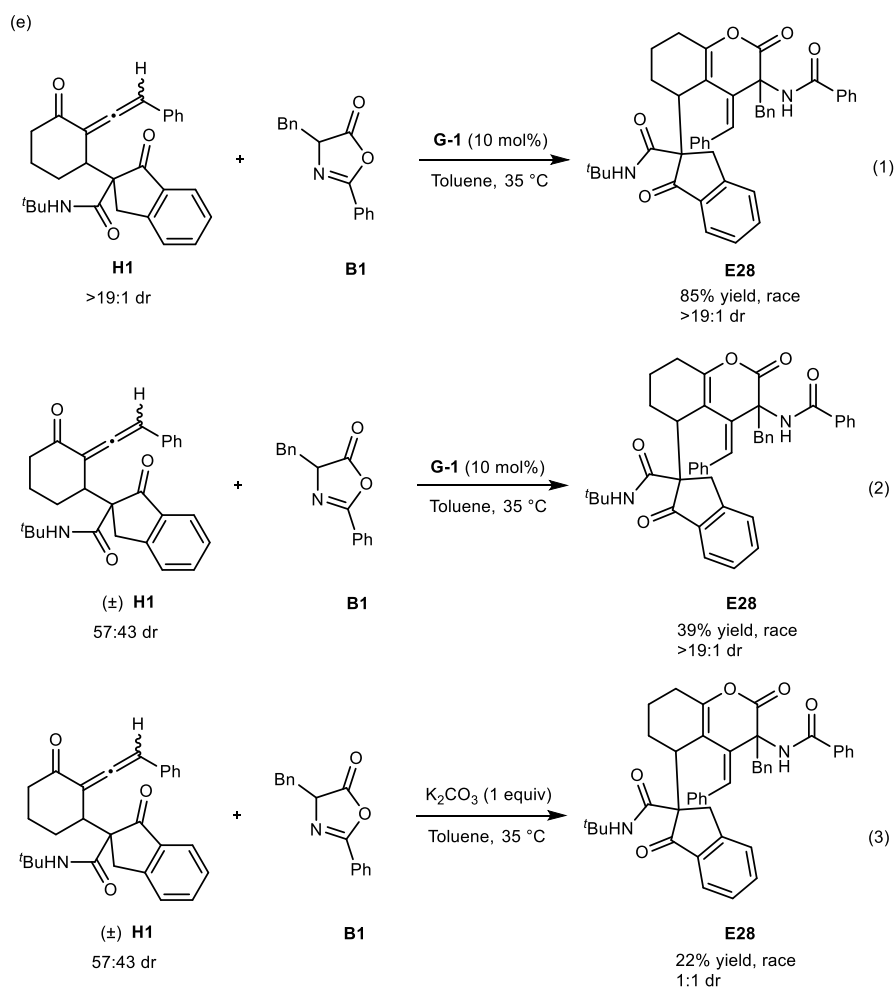

A dry reaction tube was charged with base, trisubstituted allenone **H1** (42.7 mg, 0.1 mmol) and azlactone **B1** (50.2 mg, 0.2 mmol) under N<sub>2</sub> atmosphere. Then toluene (1.0 mL) was added at 35 °C and the mixture was stirred for 12 h, the [4+2] reaction occurred as expected. The dr was determined by UPCC analysis on a chiral stationary phase.

The UPCC analysis of **H1** (Eq. 2) with 57:43 dr:

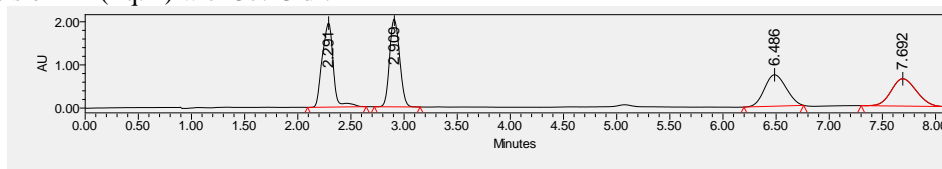

|   | Retention Time | Area     | % Area |
|---|----------------|----------|--------|
| 1 | 2.291          | 14051496 | 29.21  |
| 2 | 2.909          | 13352457 | 27.76  |
| 3 | 6.486          | 10292433 | 21.40  |
| 4 | 7.692          | 10402125 | 21.63  |

The UPCC analysis of **H1** (Eq.1) with >19:1 dr:

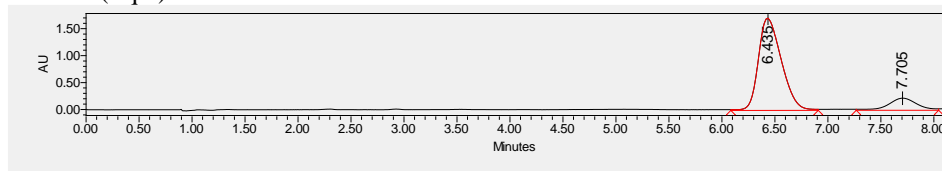

|   | Retention Time | Area     | % Area |
|---|----------------|----------|--------|
| 1 | 6.435          | 25759351 | 85.89  |
| 2 | 7.705          | 4230093  | 14.11  |

The UPCC analysis of recovered **H1** (Eq. 2) with >19:1 dr:

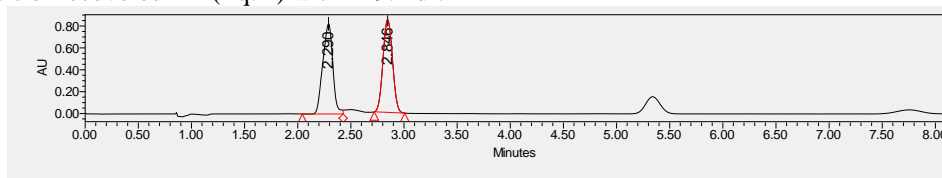

|   | Retention Time | Area    | % Area |
|---|----------------|---------|--------|
| 1 | 2.290          | 5390383 | 50.59  |
| 2 | 2.846          | 5265618 | 49.41  |

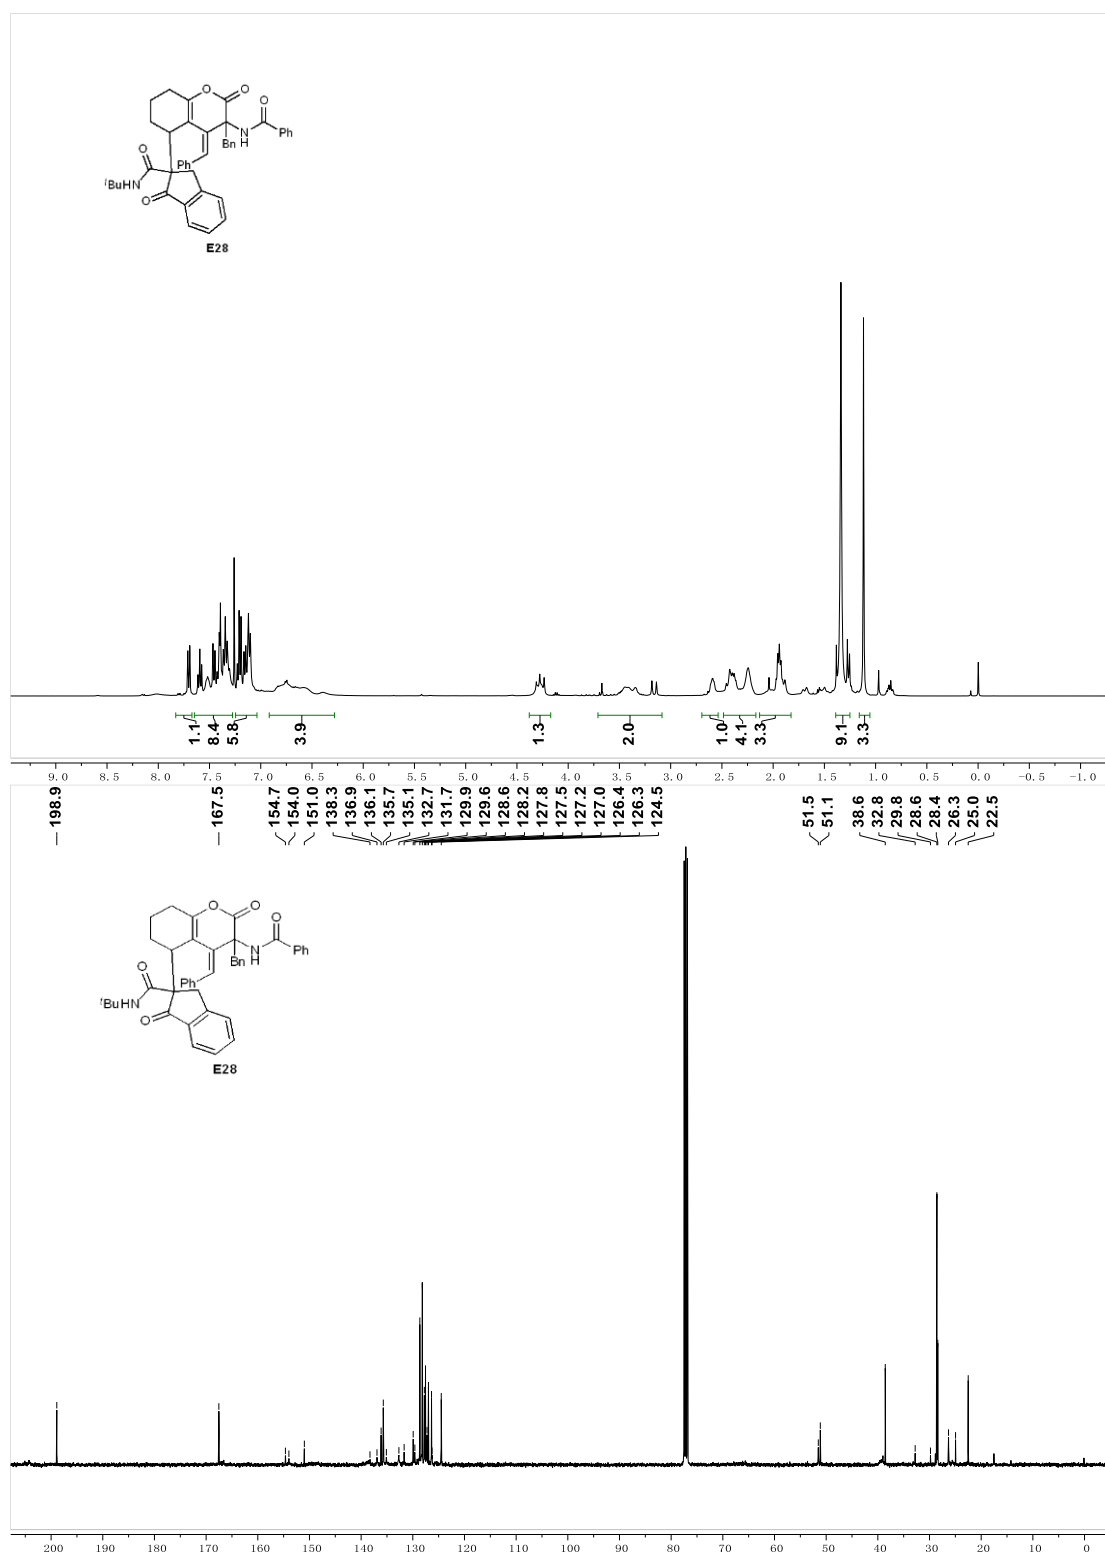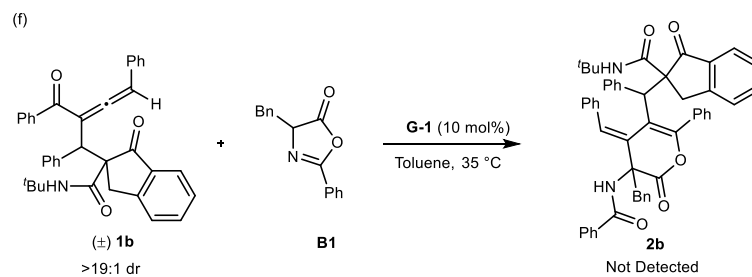

A dry reaction tube was charged with **G-1** (4.8 mg, 10 mol%), trisubstituted allenone ( $\pm$ ) **1b** (53.9 mg, 0.1 mmol) and azlactone **B1** (50.2 mg, 0.2 mmol) under  $\text{N}_2$  atmosphere. Then toluene (1.0 mL) was added at  $35^\circ\text{C}$  and the mixture was stirred for 4 h, **B1** was consumed to form dimer byproduct, but the generation of **2b** was not monitored in the reaction.



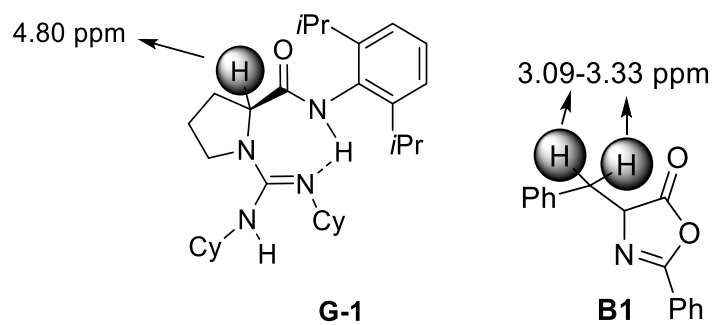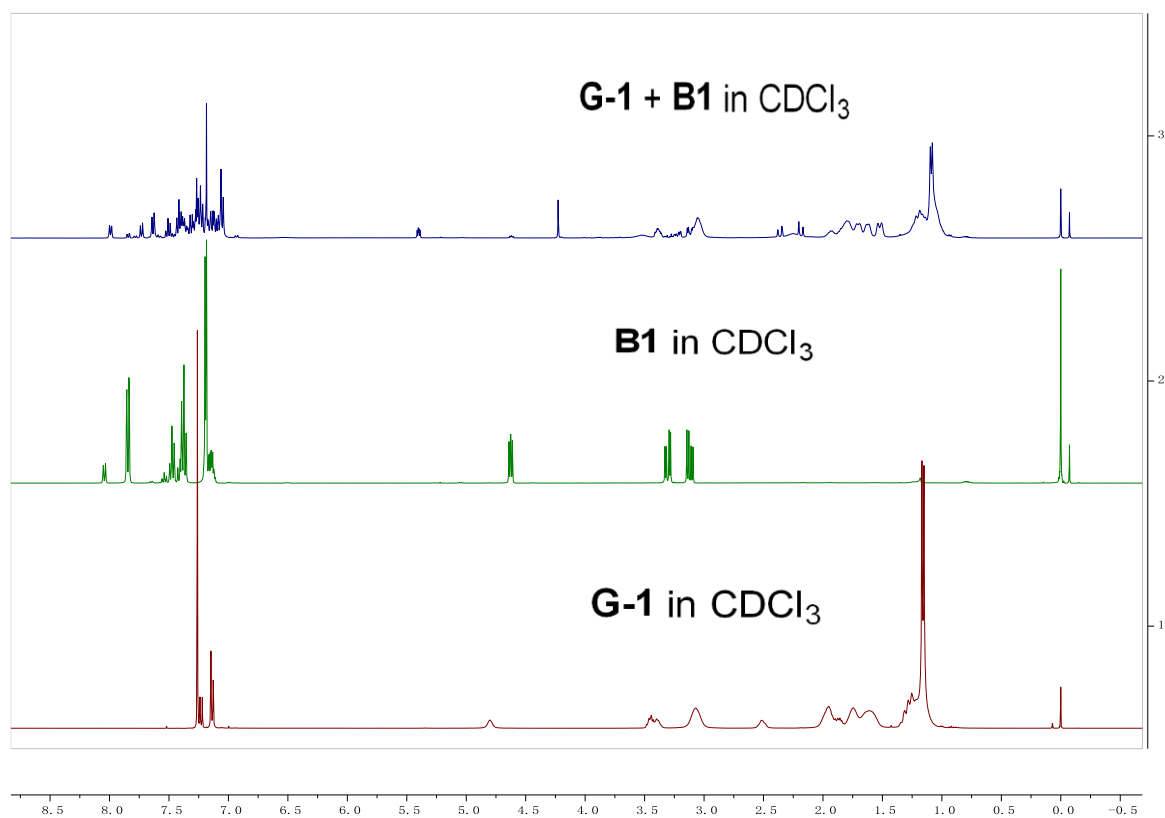

**Figure S1** <sup>1</sup>H NMR of **G-1**, **B1**, **G-1 + B1**

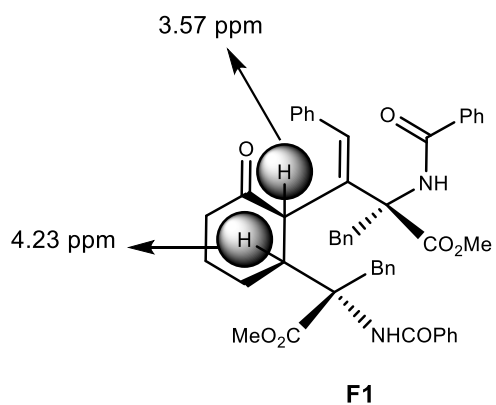

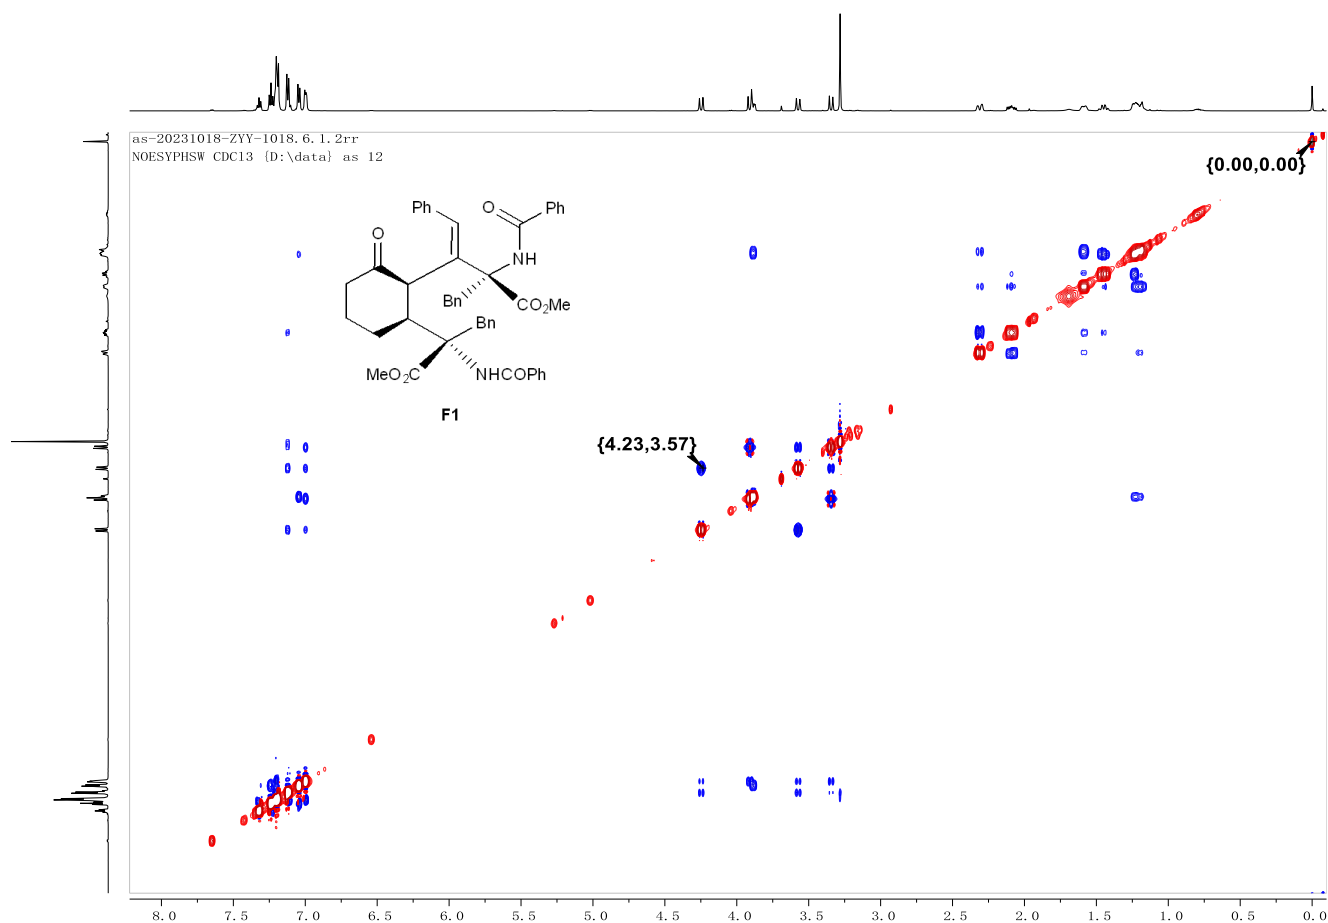

**Figure S2.** The NOESY of F1

## 8. Computational details

### 8.1 Computational methods

All DFT calculations were performed with the Gaussian 09 software package.<sup>5</sup> The geometry optimizations were carried out with the B3LYP functional<sup>6</sup> including the D3 version of Grimme's dispersion correction with the combination of Becke–Johnson damping (B3LYP-D3).<sup>7</sup> The 6-31G(d) basis set<sup>8</sup> for the C, H O and N atoms. All structures were analyzed by harmonic vibrational frequencies at the same level to characterize each stationary point as a minimum (no imaginary frequency) or a transition state (one imaginary frequency) and to obtain the thermodynamic corrections to Gibbs free energy. To have more accurate relative energies, the single point energies were calculated using the B3LYP-D3 functional with 6-311G(d) basis set and the IEF-PCM model<sup>9</sup> for considering the solvation effect (toluene). The three-dimensional geometry structures displayed in this work were generated with CYLview.<sup>10</sup> The non-covalent interaction analysis for transition state was performed using Multiwfn 3.8(dev) Program<sup>11</sup> with IGMH method<sup>12</sup>.

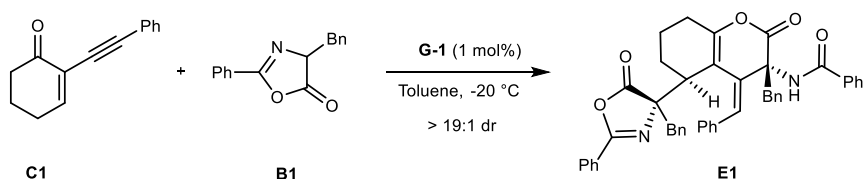

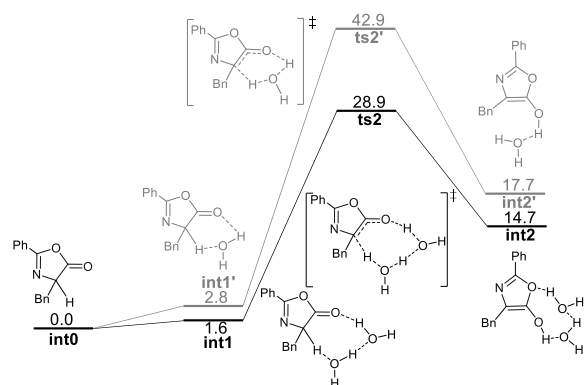

**Figure S3.** Energy profile of enolization of azlactone via DFT calculations. The relative Gibbs free energy ( $\Delta G$ ) is given in kcal/mol.

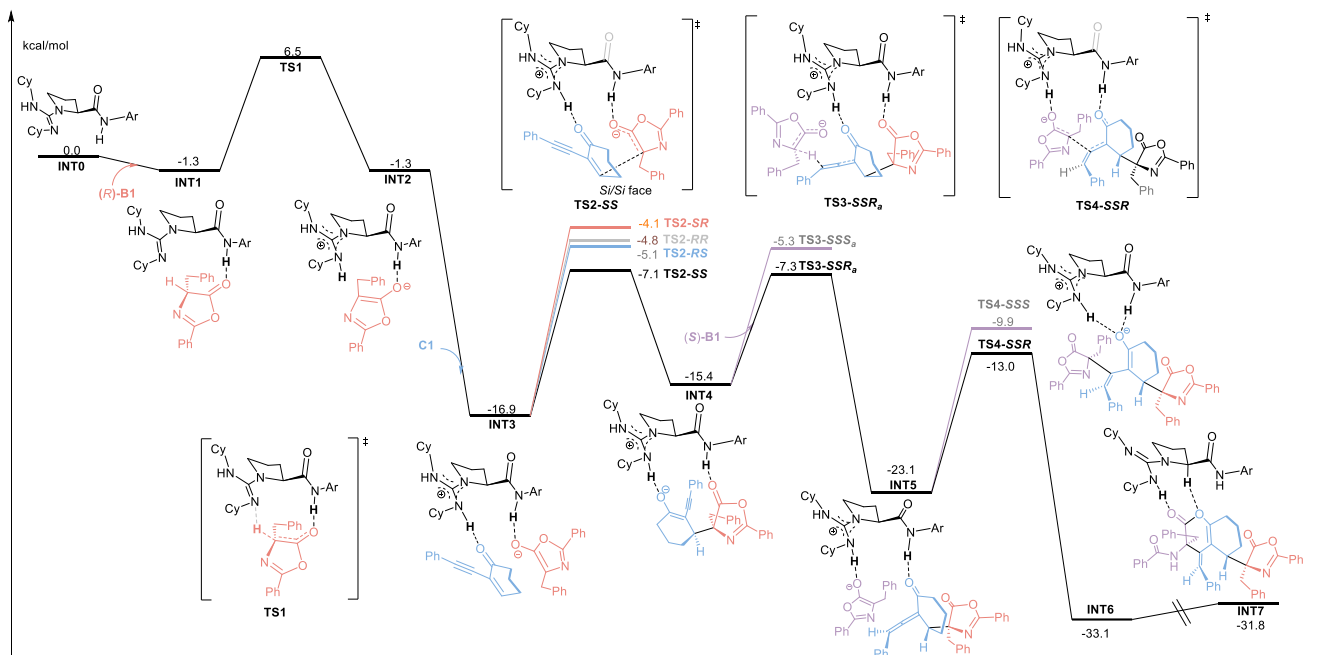

**Figure S4.** The Gibbs free energy profile of the reaction of azlactone **B1** with cyclic 1,3-ene **C1** catalyzed by **G-1**.

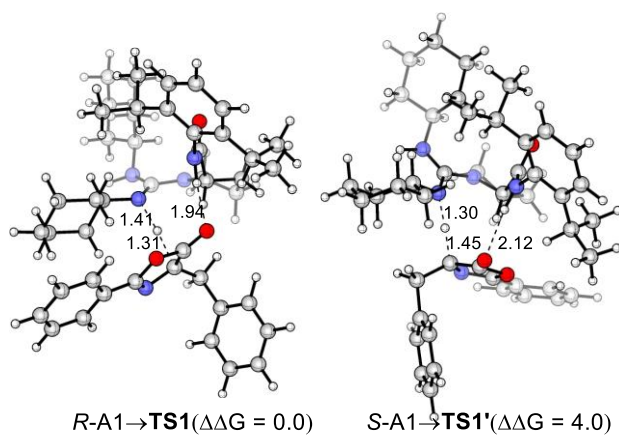

**Figure S5.** DFT-Calculated relative Gibbs free energies (in kcal/mol), selective bond distances ( $\text{\AA}$ ) of the transition states (**TS1**) in proton transfer step.

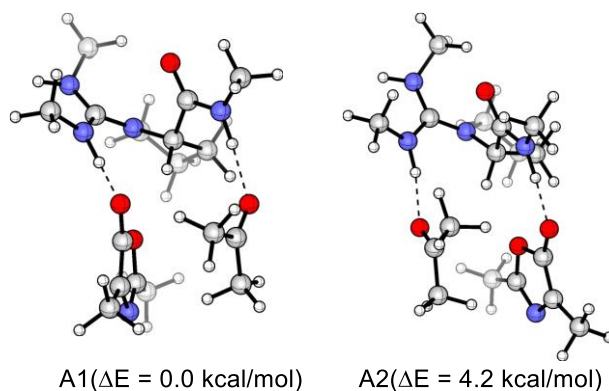

**Figure S6.** DFT-Calculated relative energies of selected model complexes.

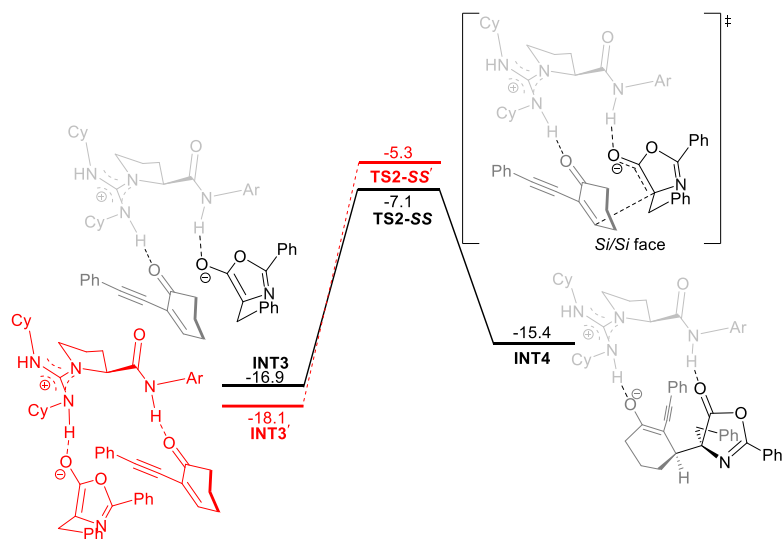

**Figure S7.** DFT-Calculated relative Gibbs free energies (in kcal/mol) of the transition states (TS2-SS and TS2-SS').

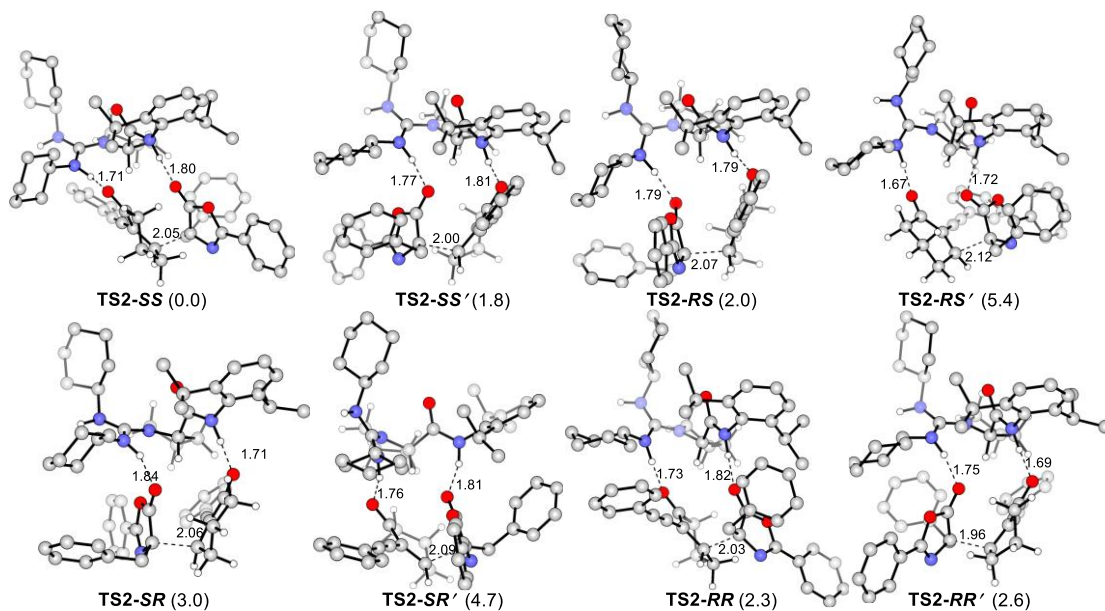

**Figure S8.** DFT-Calculated relative Gibbs free energies (in kcal/mol), selective bond distances (Å) of the transition states in the Michael-Addition step of **C1** and **B1** catalyzed by **G-1**.

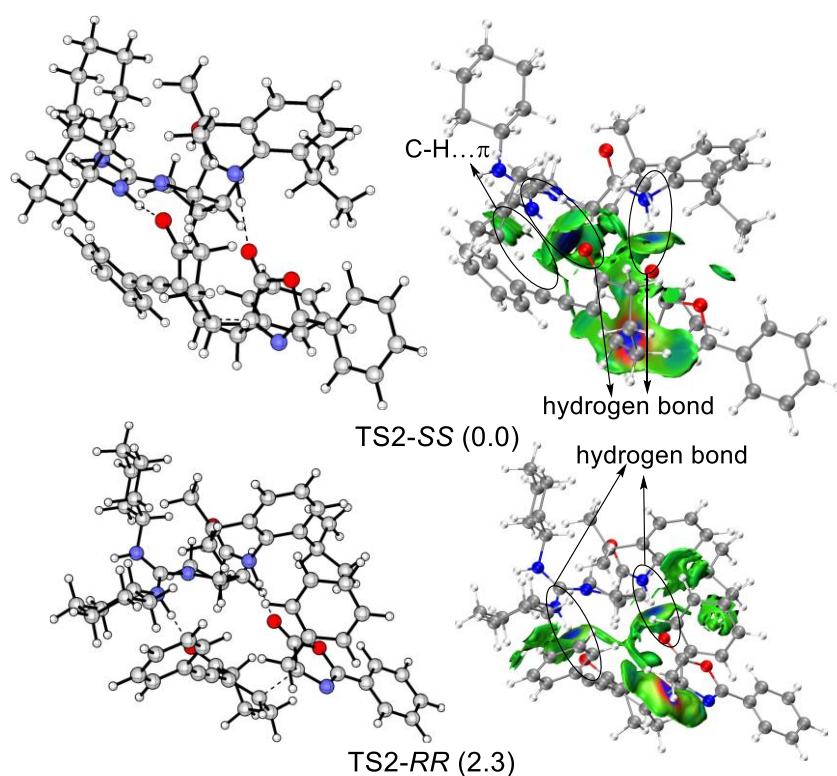

**Figure S9.** Optimized geometries and non-covalent interaction analysis of **TS2-SS** and **TS2-RR**.

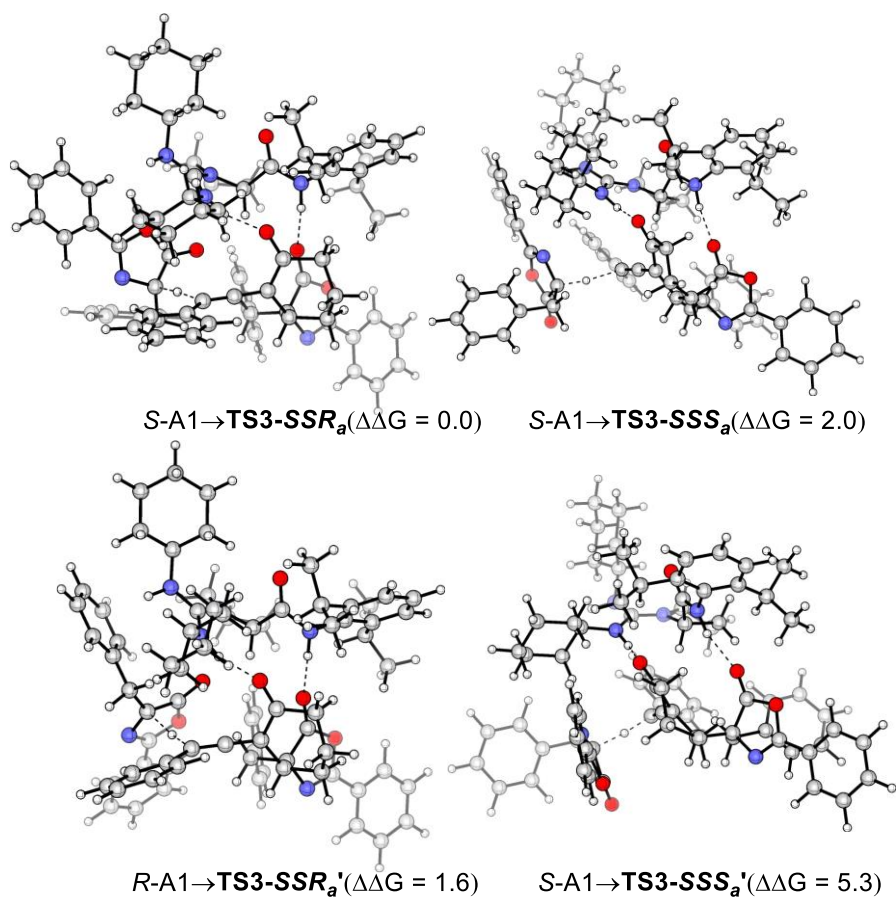

**Figure S10.** DFT-Calculated relative Gibbs free energies (in kcal/mol), selective bond distances (Å) of the transition states (**TS3**) in proton transfer step.

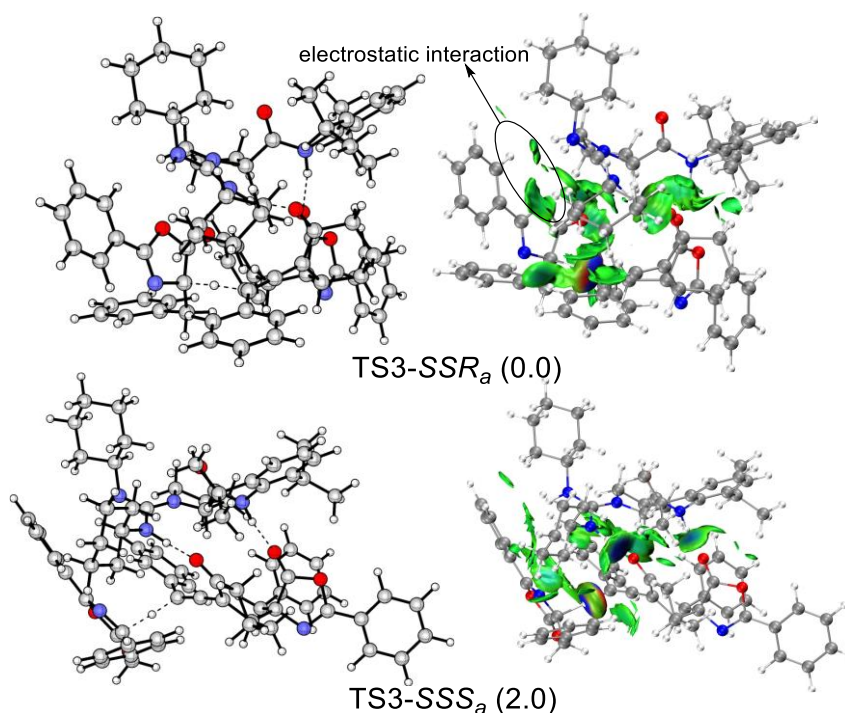

**Figure S11.** Optimized geometries and non-covalent interaction analysis of **TS3-SSR<sub>a</sub>** and **TS3-SSS<sub>a</sub>**.

To understand the origin of enantioselectivity of the reaction of azlactone **B1** with cyclic 1,3-enyne **A1** catalyzed by **G-1**, density functional theory (DFT) calculations have been performed at the B3LYP-D3(PCM)/6-311G(d)//B3LYP-D3/6-31G(d) level of theory. Initially, the carbonyl of azlactone (*R*)-**B1** engages in hydrogen bonding with the amide of **G-1**, leading to the formation of **INT1**. Subsequently, a proton from the azlactone is transferred to the basic imine nitrogen of **G-1** via transition state **TS1**, resulting in the hydrogen-bonded enolate intermediate **INT2**. While guanidium is typically considered to possess increased hydrogen-bond donor ability due to its positive charge, our analysis (Figure S6) reveals that in the transition state **TS2-SS**, where guanidinium prefers bonding with the carbonyl of 1,3-enyne, a lower energy barrier is observed compared to **TS2-SS'** (Figure S7). The preferred arrangement in **TS2-SS** results in a lower LUMO energy of the 1,3-enyne, facilitating conjugate addition through stronger H-bond activation and avoiding significant steric hindrance between the 2-alkyne substitution of 1,3-enyne and the amide substitution in **G-1** shown in **TS2-SS'**. Furthermore, the energy of **TS2-SS** is lower than that of **TS2-RR** by 2.3 kcal/mol. Such a tight activation mechanism leads to high activity and stereoselectivity, yielding **INT4**. Subsequently, prototropy occurs with (*S*)-azlactone to the alkyne group via transition state **TS3**, resulting in allenone intermediate **INT5**. During this step, **TS3-SSSa** was found to be unstable by 2.0 kcal/mol compared to the favorable **TS3-SSRa**, potentially due to electrostatic interactions between the enolate and the guanidinium plane (Figure S11). Next, an inverse-electron-demand cycloaddition between the second enolized azlactone and allenone from **INT5** takes place in a stepwise manner, as shown in **TS4**. The energy of **TS4-SSR** was found to be lower by 3.1 kcal/mol compared to **TS4-SSS**. Eventually, the Michael addition/prototropy/lactonalization pro-product **INT7** is formed with high enantioselectivity and diastereoselectivity.

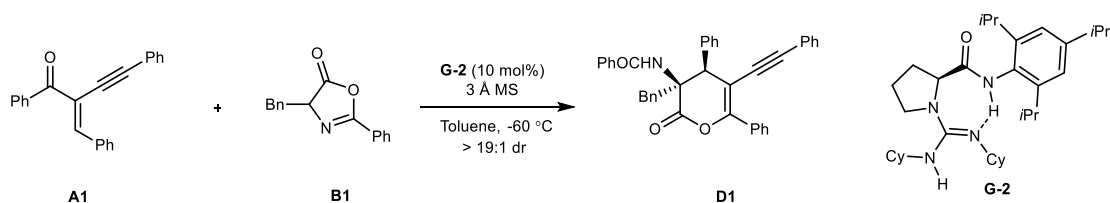



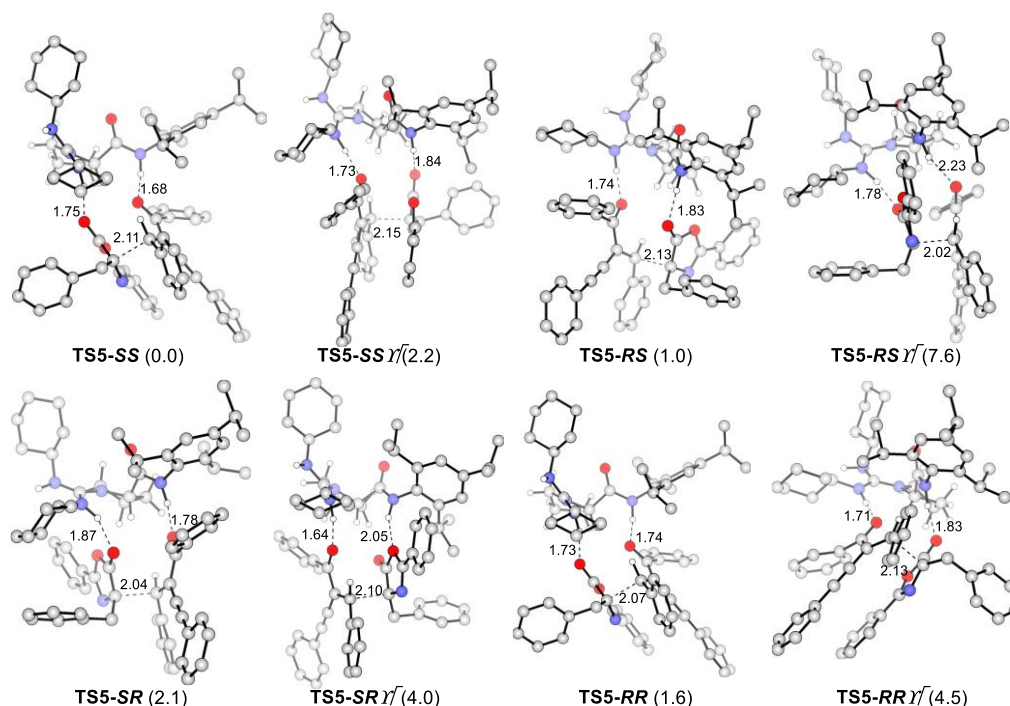

**Figure S12.** DFT-Calculated relative Gibbs free energies (in kcal/mol), selective bond distances (Å) of the transition states in the reaction of **A1** with **B1** catalyzed by **G-2**.

we have also explored the direct enantioselective inverse-electron-demand hetero-Diels-Alder reaction involving azlactone **B1** and acyclic 1,3-enyne **A1** catalyzed by **G-2**. As shown in above figure, in the favorable transition state leading to the formation of (*S,S*)-**D1**, the bifunctional catalytic mode is reversed compared to **TS2** in the cyclic 1,3-enyne case (Figure S8 and S9). Here, guanidinium bonds with the enolized azlactone, while the amide bonds with the 1,3-enyne **A1**. The enol-type activation proceeds through nucleophilic addition to  $\alpha$ -alkyne-substituted cyclic enone via *Si-Si* facial attacking, with subsequent rapid lactonization instead of protropy, resulting in the cyclization product **D1**. In this context, the guanidinium-active azlactone facilitates the second cyclization step through a stronger hydrogen bond, while the weaker amide releases the oxygen from the enyne for lactonization.

## 8.2 Cartesian coordinates

|             |              |              |              |   |              |              |              |
|-------------|--------------|--------------|--------------|---|--------------|--------------|--------------|
| <b>INT0</b> |              |              |              | O | -1.542855000 | -2.749890000 | -0.079771000 |
| N           | 2.870756000  | 0.074190000  | -1.025525000 | C | -1.222476000 | -1.721688000 | -0.669644000 |
| N           | 0.625459000  | 0.820422000  | -1.377380000 | N | -1.687573000 | -0.478707000 | -0.382276000 |
| N           | 1.137812000  | -1.432624000 | -1.506660000 | C | -2.597142000 | -0.171294000 | 0.677907000  |
| C           | 1.514428000  | -0.119737000 | -1.296274000 | C | -2.105277000 | 0.092728000  | 1.969209000  |
| C           | 2.054701000  | -2.425501000 | -2.099690000 | C | -3.022864000 | 0.428315000  | 2.970726000  |
| H           | 2.936368000  | -1.925201000 | -2.506568000 | H | -2.667159000 | 0.627982000  | 3.977017000  |
| H           | 2.384498000  | -3.142944000 | -1.336487000 | C | -4.385111000 | 0.499589000  | 2.698049000  |
| C           | 1.208365000  | -3.128576000 | -3.164819000 | C | -4.854620000 | 0.231254000  | 1.414887000  |
| C           | -0.191555000 | -3.103247000 | -2.546153000 | H | -5.919891000 | 0.284405000  | 1.214290000  |
| H           | -0.301213000 | -3.868664000 | -1.772221000 | C | -3.973029000 | -0.104714000 | 0.383275000  |
| H           | -0.996043000 | -3.241204000 | -3.273583000 | H | -1.142545000 | 0.272666000  | -0.821525000 |
| C           | -0.264543000 | -1.726189000 | -1.883686000 | C | -0.629255000 | -0.060952000 | 2.296448000  |
| H           | -0.598667000 | -0.959460000 | -2.593141000 | C | -0.395454000 | -1.427996000 | 2.966727000  |
| H           | 1.568052000  | -4.138581000 | -3.383028000 | H | -0.078600000 | -0.054068000 | 1.351944000  |

|   |              |              |              |             |              |              |              |
|---|--------------|--------------|--------------|-------------|--------------|--------------|--------------|
| H | -0.950723000 | -1.492104000 | 3.910223000  | H           | 6.016811000  | -1.826963000 | 0.875505000  |
| H | -0.735642000 | -2.236562000 | 2.313546000  | H           | 3.082937000  | -1.666790000 | 3.303761000  |
| H | 0.667186000  | -1.576887000 | 3.190772000  | H           | 3.778055000  | -2.647907000 | 2.020494000  |
| C | -4.484205000 | -0.448791000 | -1.006556000 | H           | 5.598908000  | -1.549604000 | 3.304954000  |
| C | -4.829743000 | -1.949008000 | -1.080151000 | H           | 4.874008000  | 0.032277000  | 3.028520000  |
| H | -3.662034000 | -0.266823000 | -1.706590000 | H           | 3.078651000  | 1.060446000  | -0.932103000 |
| H | -5.661467000 | -2.181755000 | -0.403914000 | H           | -5.084157000 | 0.761372000  | 3.487922000  |
| H | -5.132214000 | -2.226595000 | -2.097468000 | <b>INT1</b> |              |              |              |
| H | -3.974286000 | -2.563524000 | -0.786439000 | N           | 2.247166000  | -2.474266000 | 1.624564000  |
| H | 1.227973000  | -2.551172000 | -4.096869000 | N           | 0.614805000  | -1.173336000 | 0.446080000  |
| C | -5.673166000 | 0.413472000  | -1.451665000 | N           | 1.773884000  | -0.268401000 | 2.221147000  |
| H | -5.451508000 | 1.482314000  | -1.357988000 | C           | 1.507180000  | -1.322925000 | 1.372530000  |
| H | -5.915242000 | 0.204438000  | -2.499836000 | C           | 2.083393000  | -0.406111000 | 3.647835000  |
| H | -6.574472000 | 0.202862000  | -0.864610000 | H           | 1.740476000  | -1.375359000 | 4.020745000  |
| C | -0.076575000 | 1.084386000  | 3.156728000  | H           | 3.165374000  | -0.334038000 | 3.827055000  |
| H | 1.005343000  | 0.966757000  | 3.287611000  | C           | 1.367179000  | 0.793653000  | 4.277600000  |
| H | -0.260095000 | 2.059959000  | 2.692998000  | C           | 1.508288000  | 1.863438000  | 3.187062000  |
| H | -0.523793000 | 1.098769000  | 4.156977000  | H           | 2.525016000  | 2.268794000  | 3.178658000  |
| C | 0.942546000  | 2.178882000  | -0.972001000 | H           | 0.801465000  | 2.692088000  | 3.284526000  |
| C | 1.545783000  | 2.994919000  | -2.132131000 | C           | 1.281669000  | 1.071654000  | 1.889721000  |
| C | -0.335262000 | 2.862955000  | -0.461164000 | H           | 0.219616000  | 1.043194000  | 1.638529000  |
| H | 1.668100000  | 2.189073000  | -0.134734000 | H           | 1.804941000  | 1.091061000  | 5.235251000  |
| C | 1.806037000  | 4.452924000  | -1.731926000 | O           | 3.285381000  | 1.889369000  | 0.819572000  |
| H | 0.838869000  | 2.953044000  | -2.971673000 | C           | 2.081474000  | 1.665182000  | 0.718359000  |
| H | 2.470739000  | 2.521058000  | -2.486687000 | N           | 1.341619000  | 1.927768000  | -0.389157000 |
| C | -0.081610000 | 4.317799000  | -0.050777000 | C           | 1.809306000  | 2.649027000  | -1.532649000 |
| H | -1.084867000 | 2.827279000  | -1.264413000 | C           | 2.719480000  | 2.060883000  | -2.426585000 |
| H | -0.746260000 | 2.293056000  | 0.379763000  | C           | 3.124701000  | 2.813129000  | -3.536994000 |
| C | 0.531377000  | 5.123933000  | -1.203476000 | H           | 3.834480000  | 2.383227000  | -4.237682000 |
| H | 2.207572000  | 5.012301000  | -2.585885000 | C           | 2.629993000  | 4.091850000  | -3.760900000 |
| H | 2.578592000  | 4.481758000  | -0.948909000 | C           | 1.723752000  | 4.655740000  | -2.864315000 |
| H | -1.016727000 | 4.781039000  | 0.286189000  | H           | 1.348276000  | 5.657242000  | -3.045119000 |
| H | 0.604034000  | 4.337289000  | 0.809437000  | C           | 1.305510000  | 3.952385000  | -1.733208000 |
| H | 0.746894000  | 6.150067000  | -0.881001000 | H           | 0.352363000  | 1.709970000  | -0.340252000 |
| H | -0.201132000 | 5.196645000  | -2.020281000 | C           | 3.284664000  | 0.664840000  | -2.221027000 |
| C | 3.593229000  | -0.710420000 | -0.005635000 | C           | 4.775834000  | 0.741547000  | -1.850224000 |
| C | 4.962685000  | -0.060151000 | 0.217443000  | H           | 2.751475000  | 0.204950000  | -1.384626000 |
| C | 2.824421000  | -0.841592000 | 1.315534000  | H           | 5.351770000  | 1.219214000  | -2.652081000 |
| H | 3.766748000  | -1.717218000 | -0.400449000 | H           | 4.905305000  | 1.318140000  | -0.931892000 |
| C | 5.781524000  | -0.826052000 | 1.264623000  | H           | 5.185327000  | -0.263566000 | -1.697955000 |
| H | 4.809535000  | 0.973802000  | 0.565217000  | C           | 0.393723000  | 4.587903000  | -0.691686000 |
| H | 5.501437000  | -0.001620000 | -0.735862000 | C           | 1.245522000  | 5.153521000  | 0.462510000  |
| C | 3.640300000  | -1.611511000 | 2.361271000  | H           | -0.246570000 | 3.804911000  | -0.276321000 |
| H | 2.597314000  | 0.166991000  | 1.689761000  | H           | 1.865540000  | 5.984212000  | 0.104895000  |
| H | 1.867941000  | -1.338719000 | 1.130622000  | H           | 0.604057000  | 5.529700000  | 1.268930000  |
| C | 5.013004000  | -0.964760000 | 2.585776000  | H           | 1.917439000  | 4.395991000  | 0.875936000  |
| H | 6.740756000  | -0.320986000 | 1.428658000  | H           | 0.309529000  | 0.554070000  | 4.444835000  |



|   |              |              |              |            |              |              |              |
|---|--------------|--------------|--------------|------------|--------------|--------------|--------------|
| C | -0.537069000 | 5.667965000  | -1.256162000 | C          | -2.324787000 | -0.271857000 | 1.450213000  |
| H | -1.114960000 | 5.293859000  | -2.108121000 | C          | -3.489613000 | -1.006868000 | -0.261042000 |
| H | -1.242294000 | 5.991010000  | -0.482392000 | C          | -4.234610000 | -1.794724000 | -1.238315000 |
| H | 0.015081000  | 6.556953000  | -1.582510000 | C          | -4.428811000 | -1.327439000 | -2.544901000 |
| C | 3.076427000  | -0.229151000 | -3.455639000 | C          | -5.089512000 | -2.128725000 | -3.473786000 |
| H | 3.381362000  | -1.258283000 | -3.230738000 | C          | -5.556357000 | -3.390776000 | -3.104551000 |
| H | 2.028771000  | -0.246433000 | -3.771829000 | C          | -5.365892000 | -3.855068000 | -1.799229000 |
| H | 3.676202000  | 0.112544000  | -4.307059000 | C          | -4.707246000 | -3.062630000 | -0.866628000 |
| C | 0.492813000  | -2.162940000 | -0.613352000 | C          | -2.828363000 | 0.360476000  | 2.761574000  |
| C | -0.415837000 | -3.347065000 | -0.221344000 | C          | -4.164291000 | 1.043420000  | 2.591953000  |
| C | -0.062793000 | -1.477494000 | -1.869667000 | C          | -5.352043000 | 0.302010000  | 2.623847000  |
| H | 1.486089000  | -2.574583000 | -0.881068000 | C          | -6.581397000 | 0.921672000  | 2.403839000  |
| C | -0.593275000 | -4.336887000 | -1.381358000 | C          | -6.639245000 | 2.292549000  | 2.146198000  |
| H | -1.390491000 | -2.947531000 | 0.083538000  | C          | -5.461122000 | 3.038813000  | 2.108510000  |
| H | -0.012487000 | -3.863413000 | 0.660263000  | C          | -4.232050000 | 2.417015000  | 2.329287000  |
| C | -0.224004000 | -2.456930000 | -3.036665000 | H          | -4.053427000 | -0.350080000 | -2.825431000 |
| H | -1.037503000 | -1.040453000 | -1.625196000 | H          | -5.235307000 | -1.768498000 | -4.487644000 |
| H | 0.590905000  | -0.642776000 | -2.138503000 | H          | -6.066231000 | -4.014901000 | -3.832760000 |
| C | -1.117219000 | -3.642225000 | -2.645537000 | H          | -5.727240000 | -4.838288000 | -1.513047000 |
| H | -1.272578000 | -5.145259000 | -1.082806000 | H          | -4.536817000 | -3.407690000 | 0.147350000  |
| H | 0.375109000  | -4.808813000 | -1.606044000 | H          | -2.070116000 | 1.076668000  | 3.096656000  |
| H | -0.641122000 | -1.937490000 | -3.908464000 | H          | -2.885864000 | -0.437941000 | 3.508248000  |
| H | 0.765736000  | -2.829410000 | -3.339412000 | H          | -5.305431000 | -0.766720000 | 2.811936000  |
| H | -1.182789000 | -4.361069000 | -3.472037000 | H          | -7.494761000 | 0.333910000  | 2.432984000  |
| H | -2.137271000 | -3.280358000 | -2.461815000 | H          | -7.597172000 | 2.775758000  | 1.975639000  |
| C | 3.707076000  | -2.433805000 | 1.832667000  | H          | -5.497039000 | 4.105775000  | 1.907104000  |
| C | 4.232660000  | -3.873150000 | 1.815539000  | H          | -3.314297000 | 2.997192000  | 2.286288000  |
| C | 4.443335000  | -1.565064000 | 0.802874000  | H          | 2.951423000  | 4.654604000  | -4.633303000 |
| H | 3.901849000  | -2.023953000 | 2.830276000  | H          | -1.312504000 | -0.682470000 | 1.579442000  |
| C | 5.750051000  | -3.918203000 | 2.036914000  | <b>TS1</b> |              |              |              |
| H | 3.997917000  | -4.321553000 | 0.837050000  | N          | -2.121754000 | -2.272807000 | -2.063300000 |
| H | 3.708140000  | -4.466451000 | 2.574505000  | N          | -0.491694000 | -1.297843000 | -0.643248000 |
| C | 5.959685000  | -1.606904000 | 1.028555000  | N          | -1.496841000 | -0.033994000 | -2.283619000 |
| H | 4.206119000  | -1.944623000 | -0.202244000 | C          | -1.350713000 | -1.216140000 | -1.631822000 |
| H | 4.081016000  | -0.534528000 | 0.855550000  | C          | -1.930902000 | 0.115877000  | -3.674881000 |
| C | 6.491610000  | -3.045337000 | 1.015361000  | H          | -1.685190000 | -0.783699000 | -4.244861000 |
| H | 6.102869000  | -4.955365000 | 1.986830000  | H          | -3.015088000 | 0.281733000  | -3.730525000 |
| H | 5.975811000  | -3.558995000 | 3.051256000  | C          | -1.179700000 | 1.372289000  | -4.122479000 |
| H | 6.464745000  | -1.000477000 | 0.268337000  | C          | -1.219439000 | 2.242219000  | -2.858454000 |
| H | 6.191210000  | -1.142829000 | 1.998371000  | H          | -2.203282000 | 2.710905000  | -2.758173000 |
| H | 7.569467000  | -3.059034000 | 1.218453000  | H          | -0.455357000 | 3.022772000  | -2.836105000 |
| H | 6.354540000  | -3.471636000 | 0.010732000  | C          | -1.021454000 | 1.233153000  | -1.708469000 |
| H | 1.979784000  | -3.229206000 | 1.005712000  | H          | 0.031783000  | 1.171584000  | -1.440907000 |
| O | -1.644654000 | 1.778433000  | 0.225139000  | H          | -1.645024000 | 1.852525000  | -4.987964000 |
| O | -2.987851000 | 0.218214000  | -0.719372000 | O          | -3.094640000 | 1.656695000  | -0.568016000 |
| N | -3.186626000 | -1.329935000 | 0.935182000  | C          | -1.868067000 | 1.620687000  | -0.486335000 |
| C | -2.235003000 | 0.731621000  | 0.313658000  | N          | -1.150981000 | 1.941360000  | 0.617981000  |

|   |              |              |              |   |              |              |              |
|---|--------------|--------------|--------------|---|--------------|--------------|--------------|
| C | -1.702297000 | 2.580568000  | 1.773427000  | C | -3.586257000 | -2.171610000 | -2.238232000 |
| C | -2.597849000 | 1.898094000  | 2.613488000  | C | -4.135891000 | -3.577410000 | -2.498401000 |
| C | -3.103126000 | 2.582833000  | 3.726413000  | C | -4.277350000 | -1.515069000 | -1.035504000 |
| H | -3.804482000 | 2.078195000  | 4.384551000  | H | -3.785463000 | -1.566060000 | -3.128912000 |
| C | -2.714256000 | 3.885857000  | 4.009391000  | C | -5.658863000 | -3.549806000 | -2.684441000 |
| C | -1.811198000 | 4.539337000  | 3.172610000  | H | -3.889405000 | -4.217276000 | -1.636373000 |
| H | -1.512758000 | 5.556423000  | 3.402052000  | H | -3.642211000 | -4.013595000 | -3.375353000 |
| C | -1.297307000 | 3.907513000  | 2.038781000  | C | -5.798891000 | -1.487700000 | -1.223015000 |
| H | -0.133334000 | 1.931488000  | 0.527539000  | H | -4.025605000 | -2.093480000 | -0.133902000 |
| C | -3.021964000 | 0.458206000  | 2.371508000  | H | -3.894949000 | -0.500501000 | -0.891020000 |
| C | -4.517750000 | 0.374537000  | 2.024852000  | C | -6.359314000 | -2.890645000 | -1.488353000 |
| H | -2.460193000 | 0.080080000  | 1.513822000  | H | -6.031445000 | -4.569609000 | -2.836560000 |
| H | -5.134551000 | 0.737142000  | 2.855838000  | H | -5.898178000 | -2.988999000 | -3.599238000 |
| H | -4.731187000 | 0.976184000  | 1.139102000  | H | -6.269678000 | -1.042265000 | -0.339646000 |
| H | -4.806565000 | -0.664332000 | 1.824245000  | H | -6.044974000 | -0.830700000 | -2.069780000 |
| C | -0.383729000 | 4.643300000  | 1.065550000  | H | -7.440956000 | -2.845765000 | -1.663334000 |
| C | -1.212110000 | 5.174103000  | -0.121475000 | H | -6.210023000 | -3.514504000 | -0.595032000 |
| H | 0.345953000  | 3.930996000  | 0.670519000  | H | -1.845411000 | -3.146028000 | -1.632230000 |
| H | -1.915545000 | 5.942979000  | 0.219400000  | O | 1.687133000  | 1.979802000  | 0.003203000  |
| H | -0.558757000 | 5.621135000  | -0.880505000 | O | 2.770190000  | 0.301820000  | 1.129477000  |
| H | -1.797509000 | 4.379406000  | -0.592812000 | N | 3.273407000  | -1.125305000 | -0.541879000 |
| H | -0.146625000 | 1.116266000  | -4.384268000 | C | 2.261450000  | 0.895456000  | -0.032146000 |
| C | 0.421258000  | 5.779660000  | 1.708067000  | C | 2.485799000  | -0.076178000 | -1.083327000 |
| H | 0.978675000  | 5.429983000  | 2.583499000  | C | 3.370665000  | -0.879468000 | 0.720342000  |
| H | 1.140847000  | 6.177457000  | 0.984281000  | C | 3.947165000  | -1.732740000 | 1.751055000  |
| H | -0.219245000 | 6.612637000  | 2.020727000  | C | 3.796419000  | -1.426943000 | 3.111309000  |
| C | -2.688957000 | -0.433865000 | 3.580530000  | C | 4.301601000  | -2.293343000 | 4.078854000  |
| H | -2.900934000 | -1.484772000 | 3.349175000  | C | 4.962899000  | -3.462571000 | 3.700495000  |
| H | -1.633764000 | -0.352617000 | 3.861304000  | C | 5.122447000  | -3.763925000 | 2.344151000  |
| H | -3.287927000 | -0.161378000 | 4.456819000  | C | 4.617644000  | -2.907395000 | 1.372533000  |
| C | -0.416996000 | -2.434175000 | 0.264654000  | C | 2.642167000  | 0.310832000  | -2.534974000 |
| C | 0.522744000  | -3.539054000 | -0.251772000 | C | 3.956697000  | 1.019741000  | -2.789608000 |
| C | 0.046708000  | -1.941521000 | 1.640900000  | C | 5.083463000  | 0.311439000  | -3.217775000 |
| H | -1.428850000 | -2.856526000 | 0.388516000  | C | 6.304654000  | 0.961171000  | -3.399924000 |
| C | 0.622170000  | -4.697428000 | 0.750918000  | C | 6.413104000  | 2.329947000  | -3.151415000 |
| H | 1.512838000  | -3.095208000 | -0.416594000 | C | 5.294846000  | 3.043277000  | -2.715169000 |
| H | 0.180460000  | -3.906144000 | -1.229697000 | C | 4.075447000  | 2.391949000  | -2.534922000 |
| C | 0.147564000  | -3.089630000 | 2.650500000  | H | 3.275067000  | -0.520455000 | 3.398154000  |
| H | 1.025675000  | -1.466177000 | 1.528467000  | H | 4.175783000  | -2.054958000 | 5.131081000  |
| H | -0.637090000 | -1.164905000 | 1.990972000  | H | 5.352989000  | -4.136948000 | 4.457405000  |
| C | 1.063804000  | -4.207988000 | 2.136906000  | H | 5.638696000  | -4.671988000 | 2.045909000  |
| H | 1.319677000  | -5.455361000 | 0.374365000  | H | 4.721236000  | -3.130409000 | 0.316025000  |
| H | -0.359091000 | -5.189070000 | 0.835110000  | H | 1.810174000  | 0.964381000  | -2.818561000 |
| H | 0.518622000  | -2.706329000 | 3.608291000  | H | 2.571483000  | -0.594072000 | -3.147346000 |
| H | -0.856969000 | -3.495651000 | 2.842355000  | H | 5.001802000  | -0.757089000 | -3.399473000 |
| H | 1.075278000  | -5.045130000 | 2.845746000  | H | 7.171607000  | 0.397933000  | -3.734946000 |
| H | 2.091751000  | -3.831909000 | 2.076235000  | H | 7.363156000  | 2.837438000  | -3.294175000 |

|             |              |              |              |   |              |              |              |
|-------------|--------------|--------------|--------------|---|--------------|--------------|--------------|
| H           | 5.372496000  | 4.108481000  | -2.514500000 | H | -0.343357000 | 2.148926000  | -6.394567000 |
| H           | 3.209584000  | 2.941080000  | -2.174475000 | C | 1.154656000  | -3.856012000 | -1.914597000 |
| H           | -3.111943000 | 4.395673000  | 4.882777000  | H | 1.381316000  | -4.341480000 | -0.957010000 |
| H           | 0.909499000  | -0.652043000 | -0.891922000 | H | 0.071620000  | -3.716046000 | -1.979554000 |
| <b>INT2</b> |              |              |              | H | 1.446107000  | -4.550702000 | -2.710054000 |
| N           | 1.880533000  | -0.758480000 | 2.713544000  | C | -0.508919000 | -1.756611000 | 1.413892000  |
| N           | 0.106715000  | -0.433502000 | 1.235390000  | C | -1.404472000 | -1.814757000 | 2.662389000  |
| N           | 1.883607000  | 1.054280000  | 1.239162000  | C | -1.304790000 | -2.107767000 | 0.152265000  |
| C           | 1.289440000  | -0.042474000 | 1.722180000  | H | 0.314452000  | -2.476620000 | 1.513346000  |
| C           | 2.882302000  | 1.856814000  | 1.962346000  | C | -2.056451000 | -3.198127000 | 2.798513000  |
| H           | 2.676454000  | 1.824773000  | 3.035210000  | H | -2.172903000 | -1.037176000 | 2.571238000  |
| H           | 3.889039000  | 1.461930000  | 1.778422000  | H | -0.823659000 | -1.575180000 | 3.565314000  |
| C           | 2.718458000  | 3.239378000  | 1.328684000  | C | -1.961011000 | -3.487458000 | 0.283723000  |
| C           | 2.430342000  | 2.904435000  | -0.140517000 | H | -2.079346000 | -1.352468000 | -0.002714000 |
| H           | 3.357476000  | 2.658922000  | -0.666696000 | H | -0.643066000 | -2.062826000 | -0.716349000 |
| H           | 1.918695000  | 3.713304000  | -0.664614000 | C | -2.842610000 | -3.575984000 | 1.536178000  |
| C           | 1.543904000  | 1.647383000  | -0.078735000 | H | -2.714201000 | -3.208426000 | 3.675153000  |
| H           | 0.490647000  | 1.925654000  | -0.123452000 | H | -1.274709000 | -3.951266000 | 2.982409000  |
| H           | 3.614156000  | 3.853646000  | 1.455663000  | H | -2.557852000 | -3.689455000 | -0.612729000 |
| O           | 3.066532000  | 0.275234000  | -1.331904000 | H | -1.179461000 | -4.260323000 | 0.324585000  |
| C           | 1.902266000  | 0.651632000  | -1.196367000 | H | -3.250991000 | -4.588497000 | 1.638340000  |
| N           | 0.851253000  | 0.271903000  | -1.959558000 | H | -3.697071000 | -2.899699000 | 1.425988000  |
| C           | 0.965376000  | -0.428467000 | -3.201366000 | C | 3.307821000  | -1.148519000 | 2.732608000  |
| C           | 1.478285000  | -1.736707000 | -3.258404000 | C | 3.494521000  | -2.198166000 | 3.832800000  |
| C           | 1.569845000  | -2.350665000 | -4.514661000 | C | 3.782064000  | -1.677379000 | 1.372989000  |
| H           | 1.973442000  | -3.356636000 | -4.583147000 | H | 3.905586000  | -0.271202000 | 3.002918000  |
| C           | 1.141982000  | -1.705883000 | -5.667219000 | C | 4.956478000  | -2.658458000 | 3.907887000  |
| C           | 0.610722000  | -0.420043000 | -5.585800000 | H | 2.853024000  | -3.063798000 | 3.606221000  |
| H           | 0.271939000  | 0.072827000  | -6.490140000 | H | 3.164780000  | -1.791732000 | 4.797052000  |
| C           | 0.517854000  | 0.245164000  | -4.362189000 | C | 5.244245000  | -2.132932000 | 1.448108000  |
| H           | -0.042265000 | 0.751678000  | -1.761385000 | H | 3.143459000  | -2.528232000 | 1.094819000  |
| C           | 1.913337000  | -2.520947000 | -2.028773000 | H | 3.658453000  | -0.919284000 | 0.593619000  |
| C           | 3.431606000  | -2.766227000 | -2.036331000 | C | 5.452045000  | -3.177857000 | 2.551358000  |
| H           | 1.674731000  | -1.925050000 | -1.144091000 | H | 5.059321000  | -3.430373000 | 4.679011000  |
| H           | 3.725932000  | -3.356144000 | -2.912275000 | H | 5.582691000  | -1.812678000 | 4.225146000  |
| H           | 3.965554000  | -1.814898000 | -2.054747000 | H | 5.551567000  | -2.529230000 | 0.474497000  |
| H           | 3.734819000  | -3.326785000 | -1.143370000 | H | 5.884924000  | -1.261121000 | 1.645034000  |
| C           | 0.003062000  | 1.678676000  | -4.277136000 | H | 6.509614000  | -3.458292000 | 2.619987000  |
| C           | 1.186064000  | 2.659622000  | -4.153911000 | H | 4.899454000  | -4.092191000 | 2.291242000  |
| H           | -0.606252000 | 1.777575000  | -3.374084000 | H | 1.262888000  | -1.426009000 | 3.156202000  |
| H           | 1.794079000  | 2.642765000  | -5.066332000 | O | -1.311022000 | 1.841039000  | -1.183372000 |
| H           | 0.821134000  | 3.682485000  | -4.003648000 | O | -3.184144000 | 0.619686000  | -0.631992000 |
| H           | 1.840951000  | 2.404452000  | -3.315909000 | N | -3.362221000 | 0.991055000  | 1.560675000  |
| H           | 1.870886000  | 3.763460000  | 1.776930000  | C | -2.129678000 | 1.490597000  | -0.287002000 |
| C           | -0.897851000 | 2.082716000  | -5.450833000 | C | -2.277885000 | 1.721754000  | 1.087193000  |
| H           | -1.721812000 | 1.374124000  | -5.587070000 | C | -3.862128000 | 0.364205000  | 0.532220000  |
| H           | -1.330181000 | 3.070225000  | -5.257423000 | C | -4.918433000 | -0.629343000 | 0.521175000  |

|             |              |              |              |   |              |              |              |
|-------------|--------------|--------------|--------------|---|--------------|--------------|--------------|
| C           | -5.211899000 | -1.365018000 | -0.640111000 | H | -2.267283000 | -5.089894000 | -1.746472000 |
| C           | -6.177770000 | -2.368338000 | -0.608772000 | C | -3.234147000 | -3.562365000 | -2.902314000 |
| C           | -6.867654000 | -2.650701000 | 0.571725000  | C | -3.269697000 | -2.206902000 | -3.222696000 |
| C           | -6.587118000 | -1.912737000 | 1.726582000  | H | -4.018343000 | -1.842934000 | -3.918302000 |
| C           | -5.623702000 | -0.910893000 | 1.705962000  | C | -2.361174000 | -1.308915000 | -2.659307000 |
| C           | -1.461030000 | 2.501484000  | 2.081930000  | H | -0.985110000 | -0.067041000 | -0.639389000 |
| C           | -0.932830000 | 3.886741000  | 1.746360000  | C | -0.368949000 | -3.711059000 | -0.390229000 |
| C           | -0.427067000 | 4.660165000  | 2.803684000  | C | 0.709138000  | -4.549145000 | -1.098073000 |
| C           | 0.134295000  | 5.915384000  | 2.579954000  | H | 0.114453000  | -2.853908000 | 0.081612000  |
| C           | 0.201578000  | 6.426717000  | 1.281540000  | H | 0.256783000  | -5.399579000 | -1.622662000 |
| C           | -0.309257000 | 5.673449000  | 0.226012000  | H | 1.245382000  | -3.933149000 | -1.823590000 |
| C           | -0.876965000 | 4.415421000  | 0.452047000  | H | 1.428297000  | -4.950421000 | -0.373684000 |
| H           | -4.670024000 | -1.148154000 | -1.554457000 | C | -2.369357000 | 0.158962000  | -3.062793000 |
| H           | -6.391222000 | -2.933911000 | -1.511845000 | C | -1.485432000 | 0.358629000  | -4.307809000 |
| H           | -7.618380000 | -3.435477000 | 0.592808000  | H | -1.926028000 | 0.741147000  | -2.254678000 |
| H           | -7.122890000 | -2.122821000 | 2.648528000  | H | -1.913752000 | -0.157471000 | -5.175594000 |
| H           | -5.390038000 | -0.337846000 | 2.597141000  | H | -1.397430000 | 1.424750000  | -4.550099000 |
| H           | -0.592850000 | 1.908601000  | 2.422689000  | H | -0.479825000 | -0.044875000 | -4.146242000 |
| H           | -2.092604000 | 2.580305000  | 2.974280000  | H | 2.063391000  | 3.367485000  | -0.798956000 |
| H           | -0.474995000 | 4.266188000  | 3.817287000  | C | -3.776457000 | 0.727586000  | -3.286246000 |
| H           | 0.515909000  | 6.494882000  | 3.416632000  | H | -4.418256000 | 0.549103000  | -2.418195000 |
| H           | 0.640274000  | 7.403847000  | 1.099037000  | H | -3.711408000 | 1.809071000  | -3.445227000 |
| H           | -0.271006000 | 6.063508000  | -0.787953000 | H | -4.264490000 | 0.295209000  | -4.167564000 |
| H           | -1.241954000 | 3.832466000  | -0.384583000 | C | -1.054180000 | -4.521780000 | 0.721603000  |
| H           | 1.215503000  | -2.203944000 | -6.630172000 | H | -0.330293000 | -4.773592000 | 1.506697000  |
| H           | -0.506082000 | 0.275377000  | 0.829797000  | H | -1.873324000 | -3.958038000 | 1.178212000  |
| <b>INT3</b> |              |              |              | H | -1.467114000 | -5.464002000 | 0.343215000  |
| N           | 4.827043000  | -0.074946000 | -0.014243000 | C | 3.389352000  | -1.761926000 | 1.929664000  |
| N           | 2.886554000  | -0.590809000 | 1.195139000  | C | 3.277050000  | -1.521181000 | 3.440094000  |
| N           | 2.756243000  | 0.707199000  | -0.724418000 | C | 2.631216000  | -3.022608000 | 1.497191000  |
| C           | 3.467321000  | -0.011935000 | 0.140705000  | H | 4.446910000  | -1.899917000 | 1.677319000  |
| C           | 3.319235000  | 1.783480000  | -1.558931000 | C | 3.738864000  | -2.755790000 | 4.226407000  |
| H           | 4.196499000  | 2.207272000  | -1.067456000 | H | 2.229807000  | -1.296855000 | 3.673926000  |
| H           | 3.607636000  | 1.382847000  | -2.538786000 | H | 3.865168000  | -0.637671000 | 3.718678000  |
| C           | 2.141084000  | 2.745934000  | -1.694452000 | C | 3.108046000  | -4.24883000  | 2.282928000  |
| C           | 0.943287000  | 1.798003000  | -1.798241000 | H | 1.566557000  | -2.852905000 | 1.683375000  |
| H           | 0.866928000  | 1.398317000  | -2.815112000 | H | 2.752255000  | -3.162726000 | 0.418623000  |
| H           | -0.005072000 | 2.258326000  | -1.527368000 | C | 2.978443000  | -4.017124000 | 3.794081000  |
| C           | 1.285306000  | 0.657357000  | -0.811175000 | H | 3.610251000  | -2.578010000 | 5.300396000  |
| H           | 0.836415000  | 0.887321000  | 0.156813000  | H | 4.815884000  | -2.910631000 | 4.062336000  |
| H           | 2.240934000  | 3.401780000  | -2.563582000 | H | 2.529428000  | -5.128636000 | 1.977553000  |
| O           | 1.542646000  | -1.490722000 | -1.920193000 | H | 4.158637000  | -4.464221000 | 2.035810000  |
| C           | 0.792173000  | -0.707766000 | -1.336494000 | H | 3.346263000  | -4.888581000 | 4.348747000  |
| N           | -0.531444000 | -0.861656000 | -1.126465000 | H | 1.915564000  | -3.902490000 | 4.049163000  |
| C           | -1.403200000 | -1.808253000 | -1.748426000 | C | 5.446553000  | -0.539118000 | -1.277490000 |
| C           | -1.366585000 | -3.168062000 | -1.396380000 | C | 6.963455000  | -0.587381000 | -1.081059000 |
| C           | -2.288363000 | -4.033842000 | -1.999884000 | C | 4.889878000  | -1.895781000 | -1.730930000 |

|   |              |              |              |              |              |              |              |
|---|--------------|--------------|--------------|--------------|--------------|--------------|--------------|
| H | 5.231844000  | 0.203968000  | -2.050977000 | C            | -3.418906000 | 0.484854000  | 3.549331000  |
| C | 7.664602000  | -1.067523000 | -2.359605000 | C            | -2.294892000 | 1.404318000  | 3.199536000  |
| H | 7.193221000  | -1.284609000 | -0.259695000 | C            | -1.052701000 | 0.984251000  | 2.809549000  |
| H | 7.332351000  | 0.400302000  | -0.779029000 | C            | -0.810761000 | -0.441726000 | 2.527582000  |
| C | 5.590522000  | -2.367684000 | -3.011297000 | C            | -1.967721000 | -1.396189000 | 2.710279000  |
| H | 5.061904000  | -2.628128000 | -0.927205000 | C            | -2.938303000 | -0.946864000 | 3.804932000  |
| H | 3.807767000  | -1.820210000 | -1.881821000 | H            | -2.462668000 | 2.471218000  | 3.313738000  |
| C | 7.113302000  | -2.420045000 | -2.831456000 | H            | -4.165227000 | 0.499172000  | 2.739830000  |
| H | 8.745208000  | -1.129739000 | -2.186650000 | H            | -3.945588000 | 0.881191000  | 4.427359000  |
| H | 7.516486000  | -0.319065000 | -3.150946000 | H            | -1.555555000 | -2.390749000 | 2.901900000  |
| H | 5.201937000  | -3.349283000 | -3.304330000 | H            | -2.486535000 | -1.437704000 | 1.742954000  |
| H | 5.343229000  | -1.678900000 | -3.831900000 | H            | -2.431484000 | -0.990911000 | 4.778174000  |
| H | 7.600305000  | -2.717659000 | -3.767610000 | H            | -3.791884000 | -1.630773000 | 3.852703000  |
| H | 7.363066000  | -3.190458000 | -2.087510000 | O            | 0.277309000  | -0.861363000 | 2.114059000  |
| H | 1.906192000  | -0.372833000 | 1.409923000  | C            | 0.022012000  | 1.881864000  | 2.569136000  |
| H | 5.294355000  | -0.450338000 | 0.801341000  | C            | 0.988501000  | 2.589080000  | 2.357545000  |
| O | -1.496032000 | 1.403576000  | 0.037755000  | C            | 2.112307000  | 3.389475000  | 2.015091000  |
| O | -3.369643000 | 0.095354000  | 0.159314000  | C            | 3.391836000  | 2.806617000  | 1.915263000  |
| N | -4.951187000 | 1.593181000  | 0.666786000  | C            | 1.972529000  | 4.760641000  | 1.721495000  |
| C | -2.728318000 | 1.347165000  | 0.245664000  | C            | 4.483215000  | 3.560246000  | 1.494629000  |
| C | -3.741097000 | 2.253000000  | 0.578744000  | H            | 3.508277000  | 1.758708000  | 2.166190000  |
| C | -4.697817000 | 0.329484000  | 0.422674000  | C            | 3.070601000  | 5.508971000  | 1.306353000  |
| C | -5.592294000 | -0.808641000 | 0.376391000  | H            | 0.996125000  | 5.223162000  | 1.812114000  |
| C | -5.117753000 | -2.070297000 | -0.030598000 | C            | 4.327813000  | 4.912618000  | 1.179780000  |
| C | -5.981944000 | -3.160513000 | -0.073541000 | H            | 5.458334000  | 3.087899000  | 1.411240000  |
| C | -7.323499000 | -3.015954000 | 0.285925000  | H            | 2.943230000  | 6.563130000  | 1.076682000  |
| C | -7.798839000 | -1.762476000 | 0.687048000  | H            | 5.179694000  | 5.499186000  | 0.848597000  |
| C | -6.945522000 | -0.666050000 | 0.733066000  | H            | -3.949915000 | -4.246050000 | -3.350618000 |
| C | -3.587535000 | 3.744039000  | 0.660724000  | <b>INT3'</b> |              |              |              |
| C | -2.617250000 | 4.252774000  | -0.389073000 | N            | 1.658262000  | 4.068096000  | -0.369692000 |
| C | -2.955474000 | 4.200539000  | -1.746684000 | N            | 1.119924000  | 1.785031000  | -0.469391000 |
| C | -2.045518000 | 4.596326000  | -2.725459000 | N            | 0.333681000  | 3.091388000  | 1.279060000  |
| C | -0.778423000 | 5.058308000  | -2.358741000 | C            | 1.025837000  | 2.962978000  | 0.138319000  |
| C | -0.432020000 | 5.115132000  | -1.008680000 | C            | 0.514135000  | 4.187754000  | 2.239211000  |
| C | -1.345646000 | 4.708492000  | -0.035187000 | H            | 1.533612000  | 4.574870000  | 2.176259000  |
| H | -4.082617000 | -2.183463000 | -0.331131000 | H            | -0.189886000 | 5.002207000  | 2.026145000  |
| H | -5.601115000 | -4.124589000 | -0.399664000 | C            | 0.165388000  | 3.519304000  | 3.570089000  |
| H | -7.995492000 | -3.868977000 | 0.250702000  | C            | -0.993746000 | 2.595658000  | 3.178667000  |
| H | -8.842572000 | -1.641636000 | 0.965248000  | H            | -1.917661000 | 3.177841000  | 3.085821000  |
| H | -7.302630000 | 0.311247000  | 1.041562000  | H            | -1.167382000 | 1.768369000  | 3.866383000  |
| H | -3.241795000 | 4.070628000  | 1.652580000  | C            | -0.581160000 | 2.056049000  | 1.791028000  |
| H | -4.578147000 | 4.191126000  | 0.516565000  | H            | -0.059578000 | 1.102765000  | 1.883143000  |
| H | -3.935713000 | 3.828008000  | -2.032542000 | H            | -0.104462000 | 4.246931000  | 4.340603000  |
| H | -2.325127000 | 4.547289000  | -3.774730000 | O            | -2.201811000 | 2.870392000  | 0.206291000  |
| H | -0.068005000 | 5.369516000  | -3.120127000 | C            | -1.806388000 | 1.920065000  | 0.878733000  |
| H | 0.554545000  | 5.460460000  | -0.712529000 | N            | -2.420043000 | 0.716481000  | 0.956430000  |
| H | -1.063610000 | 4.713034000  | 1.014032000  | C            | -3.709030000 | 0.484548000  | 0.381000000  |

|   |              |              |              |   |              |              |              |
|---|--------------|--------------|--------------|---|--------------|--------------|--------------|
| C | -3.836091000 | 0.350015000  | -1.012703000 | C | 1.889008000  | 6.283105000  | -1.366429000 |
| C | -5.120684000 | 0.184470000  | -1.540607000 | C | -0.336411000 | 5.075887000  | -1.502624000 |
| H | -5.243888000 | 0.088224000  | -2.615028000 | H | 0.631754000  | 5.779548000  | 0.285426000  |
| C | -6.236115000 | 0.115548000  | -0.712413000 | C | 1.190856000  | 7.606974000  | -1.706935000 |
| C | -6.083383000 | 0.206218000  | 0.668999000  | H | 2.243248000  | 5.812084000  | -2.296894000 |
| H | -6.955966000 | 0.134283000  | 1.311037000  | H | 2.769824000  | 6.455133000  | -0.736168000 |
| C | -4.822270000 | 0.405488000  | 1.240758000  | C | -1.032573000 | 6.401192000  | -1.837210000 |
| H | -2.037635000 | 0.020436000  | 1.597677000  | H | -0.041707000 | 4.569218000  | -2.434012000 |
| C | -2.629035000 | 0.356885000  | -1.935911000 | H | -1.014176000 | 4.405000000  | -0.965302000 |
| C | -2.583909000 | 1.643626000  | -2.778110000 | C | -0.078573000 | 7.376781000  | -2.538534000 |
| H | -1.735398000 | 0.325662000  | -1.306296000 | H | 1.887423000  | 8.265159000  | -2.239036000 |
| H | -3.450201000 | 1.699880000  | -3.448801000 | H | 0.924724000  | 8.122003000  | -0.772832000 |
| H | -2.586079000 | 2.522442000  | -2.129903000 | H | -1.913625000 | 6.207656000  | -2.459140000 |
| H | -1.681281000 | 1.664551000  | -3.401913000 | H | -1.403336000 | 6.858320000  | -0.908227000 |
| C | -4.664427000 | 0.489000000  | 2.751293000  | H | -0.580038000 | 8.332705000  | -2.731028000 |
| C | -5.698575000 | 1.418549000  | 3.403799000  | H | 0.202670000  | 6.965237000  | -3.518690000 |
| H | -3.675328000 | 0.903916000  | 2.961667000  | H | 0.867348000  | 0.913836000  | 0.051274000  |
| H | -6.717010000 | 1.022565000  | 3.319447000  | H | 2.308505000  | 3.833754000  | -1.108489000 |
| H | -5.480770000 | 1.530582000  | 4.472129000  | O | 0.587258000  | -0.611888000 | 0.710033000  |
| H | -5.684967000 | 2.412368000  | 2.943212000  | O | 2.841754000  | -0.770974000 | 1.172933000  |
| H | 1.019692000  | 2.934367000  | 3.929896000  | N | 3.352936000  | -2.746246000 | 0.255025000  |
| C | -4.704702000 | -0.918674000 | 3.373372000  | C | 1.648657000  | -1.284912000 | 0.609563000  |
| H | -3.910496000 | -1.550112000 | 2.965773000  | C | 2.003877000  | -2.516213000 | 0.059639000  |
| H | -4.564031000 | -0.861999000 | 4.459064000  | C | 3.813176000  | -1.709950000 | 0.907832000  |
| H | -5.670281000 | -1.401783000 | 3.178778000  | C | 5.171835000  | -1.440261000 | 1.332154000  |
| C | -2.599619000 | -0.893242000 | -2.830564000 | C | 5.503102000  | -0.248607000 | 2.001121000  |
| H | -1.668150000 | -0.925234000 | -3.406573000 | C | 6.816155000  | -0.007514000 | 2.397329000  |
| H | -2.665331000 | -1.806318000 | -2.233517000 | C | 7.817601000  | -0.944555000 | 2.136147000  |
| H | -3.431544000 | -0.900032000 | -3.544235000 | C | 7.492702000  | -2.131623000 | 1.471071000  |
| C | 1.806415000  | 1.559921000  | -1.750153000 | C | 6.185489000  | -2.381013000 | 1.071107000  |
| C | 3.322892000  | 1.388787000  | -1.537950000 | C | 1.102035000  | -3.447311000 | -0.688182000 |
| C | 1.203186000  | 0.341111000  | -2.457900000 | C | 1.274716000  | -3.451155000 | -2.198745000 |
| H | 1.621736000  | 2.436537000  | -2.386943000 | C | 2.539361000  | -3.602653000 | -2.782791000 |
| C | 4.044790000  | 1.095878000  | -2.858368000 | C | 2.680053000  | -3.643069000 | -4.169778000 |
| H | 3.476444000  | 0.563637000  | -0.834475000 | C | 1.559515000  | -3.531768000 | -4.997130000 |
| H | 3.746601000  | 2.280960000  | -1.055740000 | C | 0.296606000  | -3.377302000 | -4.424056000 |
| C | 1.931323000  | 0.056854000  | -3.776329000 | C | 0.158949000  | -3.337279000 | -3.035023000 |
| H | 1.282044000  | -0.534547000 | -1.807785000 | H | 4.723739000  | 0.478779000  | 2.202817000  |
| H | 0.137637000  | 0.516458000  | -2.629295000 | H | 7.058934000  | 0.917777000  | 2.913428000  |
| C | 3.436590000  | -0.128131000 | -3.551792000 | H | 8.840822000  | -0.753663000 | 2.446883000  |
| H | 5.112877000  | 0.942532000  | -2.664816000 | H | 8.266058000  | -2.866404000 | 1.263465000  |
| H | 3.966410000  | 1.970846000  | -3.521842000 | H | 5.921391000  | -3.297709000 | 0.554330000  |
| H | 1.504405000  | -0.838414000 | -4.236126000 | H | 0.069656000  | -3.182062000 | -0.446685000 |
| H | 1.765661000  | 0.890306000  | -4.476358000 | H | 1.260743000  | -4.471948000 | -0.320275000 |
| H | 3.942690000  | -0.319164000 | -4.505706000 | H | 3.409218000  | -3.680382000 | -2.136969000 |
| H | 3.595298000  | -1.014819000 | -2.926192000 | H | 3.668242000  | -3.760355000 | -4.607144000 |
| C | 0.925305000  | 5.322822000  | -0.664494000 | H | 1.671517000  | -3.563308000 | -6.077585000 |

|               |              |              |              |   |              |              |              |
|---------------|--------------|--------------|--------------|---|--------------|--------------|--------------|
| H             | -0.584010000 | -3.284705000 | -5.054609000 | N | 0.393431000  | -1.121178000 | 1.160085000  |
| H             | -0.825991000 | -3.219354000 | -2.594967000 | C | 0.322251000  | -1.241849000 | 2.583828000  |
| C             | 1.921133000  | -3.150274000 | 3.553173000  | C | 1.274983000  | -0.597611000 | 3.392316000  |
| C             | 0.733820000  | -3.394007000 | 2.677111000  | C | 1.169098000  | -0.745314000 | 4.779731000  |
| C             | -0.363595000 | -2.587412000 | 2.623405000  | H | 1.899446000  | -0.261966000 | 5.422625000  |
| C             | -0.385905000 | -1.309083000 | 3.359377000  | C | 0.138406000  | -1.490537000 | 5.346518000  |
| C             | 0.882404000  | -0.921183000 | 4.093663000  | C | -0.806013000 | -2.102124000 | 4.527351000  |
| C             | 1.624368000  | -2.135084000 | 4.661297000  | H | -1.615649000 | -2.672497000 | 4.973174000  |
| H             | 0.742313000  | -4.290622000 | 2.064790000  | C | -0.729904000 | -1.998264000 | 3.135324000  |
| H             | 2.757185000  | -2.805334000 | 2.925464000  | H | -0.435724000 | -0.780642000 | 0.669285000  |
| H             | 2.257434000  | -4.103913000 | 3.980347000  | C | 2.380213000  | 0.262401000  | 2.803246000  |
| H             | 0.619910000  | -0.195408000 | 4.869768000  | C | 3.769483000  | -0.300763000 | 3.139464000  |
| H             | 1.522648000  | -0.412638000 | 3.358851000  | H | 2.274382000  | 0.233523000  | 1.717902000  |
| H             | 1.002532000  | -2.611227000 | 5.430558000  | H | 3.965861000  | -0.270097000 | 4.217793000  |
| H             | 2.553267000  | -1.818824000 | 5.147793000  | H | 3.843734000  | -1.337561000 | 2.801438000  |
| O             | -1.371132000 | -0.566769000 | 3.356222000  | H | 4.551186000  | 0.288974000  | 2.643954000  |
| C             | -1.447854000 | -2.889819000 | 1.755157000  | C | -1.765747000 | -2.695923000 | 2.264764000  |
| C             | -2.313349000 | -3.175394000 | 0.951072000  | C | -1.733638000 | -4.218296000 | 2.479281000  |
| C             | -3.211402000 | -3.553829000 | -0.086068000 | H | -1.514851000 | -2.514034000 | 1.218422000  |
| C             | -4.484571000 | -2.971000000 | -0.210981000 | H | -2.009354000 | -4.485988000 | 3.505857000  |
| C             | -2.798454000 | -4.508473000 | -1.039218000 | H | -2.442104000 | -4.712553000 | 1.804204000  |
| C             | -5.315065000 | -3.327885000 | -1.269073000 | H | -0.733434000 | -4.622353000 | 2.286338000  |
| H             | -4.804654000 | -2.226410000 | 0.507172000  | H | 0.279204000  | -2.976652000 | -3.552812000 |
| C             | -3.633915000 | -4.852687000 | -2.096825000 | C | -3.174902000 | -2.123149000 | 2.487603000  |
| H             | -1.816683000 | -4.960418000 | -0.942935000 | H | -3.194329000 | -1.045706000 | 2.310812000  |
| C             | -4.895327000 | -4.263384000 | -2.216145000 | H | -3.887182000 | -2.595226000 | 1.801325000  |
| H             | -6.288415000 | -2.856074000 | -1.358585000 | H | -3.521589000 | -2.296963000 | 3.512721000  |
| H             | -3.298226000 | -5.580149000 | -2.830489000 | C | 2.242430000  | 1.729743000  | 3.243441000  |
| H             | -5.545278000 | -4.531109000 | -3.044407000 | H | 3.015313000  | 2.348507000  | 2.773254000  |
| H             | -7.225515000 | -0.018964000 | -1.141913000 | H | 1.267483000  | 2.139502000  | 2.959363000  |
| <b>TS2-RR</b> |              |              |              | H | 2.345328000  | 1.832586000  | 4.329875000  |
| N             | 4.449648000  | -1.564817000 | -1.971286000 | C | 3.819726000  | 1.202087000  | -1.326654000 |
| N             | 2.881837000  | 0.172366000  | -1.778493000 | C | 4.546902000  | 1.883431000  | -2.497327000 |
| N             | 2.174382000  | -2.021163000 | -1.877809000 | C | 3.057730000  | 2.236772000  | -0.496329000 |
| C             | 3.169368000  | -1.122112000 | -1.874068000 | H | 4.558267000  | 0.707329000  | -0.682465000 |
| C             | 2.187574000  | -3.299422000 | -2.595008000 | C | 5.493360000  | 2.980423000  | -1.988945000 |
| H             | 2.720993000  | -3.188026000 | -3.542110000 | H | 3.789504000  | 2.313987000  | -3.165466000 |
| H             | 2.677534000  | -4.088256000 | -2.008795000 | H | 5.100284000  | 1.143845000  | -3.093283000 |
| C             | 0.689435000  | -3.582580000 | -2.738276000 | C | 3.998822000  | 3.324864000  | 0.027919000  |
| C             | 0.128835000  | -3.104410000 | -1.390856000 | H | 2.284185000  | 2.681980000  | -1.129116000 |
| H             | 0.306778000  | -3.863610000 | -0.620266000 | H | 2.536344000  | 1.739089000  | 0.325947000  |
| H             | -0.935401000 | -2.869045000 | -1.407584000 | C | 4.748812000  | 4.005654000  | -1.123137000 |
| C             | 0.954895000  | -1.833196000 | -1.081163000 | H | 5.980858000  | 3.473161000  | -2.838521000 |
| H             | 0.414757000  | -0.947364000 | -1.404889000 | H | 6.294449000  | 2.516539000  | -1.394018000 |
| H             | 0.480864000  | -4.636769000 | -2.941481000 | H | 3.425832000  | 4.061218000  | 0.598184000  |
| O             | 2.352715000  | -2.271511000 | 0.843891000  | H | 4.724863000  | 2.875126000  | 0.722525000  |
| C             | 1.322898000  | -1.757597000 | 0.406213000  | H | 5.450506000  | 4.753141000  | -0.733802000 |

|   |              |              |              |               |              |              |              |
|---|--------------|--------------|--------------|---------------|--------------|--------------|--------------|
| H | 4.023387000  | 4.547168000  | -1.744170000 | H             | -0.964711000 | 0.940291000  | 4.378363000  |
| C | 4.958212000  | -2.635000000 | -1.086196000 | H             | -0.905526000 | 1.594575000  | 1.991112000  |
| C | 5.857225000  | -3.607033000 | -1.851028000 | C             | -3.637866000 | 1.018082000  | -3.461931000 |
| C | 5.679331000  | -2.022738000 | 0.121622000  | C             | -2.828372000 | 1.762483000  | -2.402248000 |
| H | 4.079070000  | -3.153898000 | -0.701191000 | C             | -1.388309000 | 1.697532000  | -2.458727000 |
| C | 6.384886000  | -4.704882000 | -0.915858000 | C             | -0.713940000 | 0.633922000  | -3.123976000 |
| H | 6.703948000  | -3.051500000 | -2.281361000 | C             | -1.573263000 | -0.314009000 | -3.950529000 |
| H | 5.303443000  | -4.040990000 | -2.691736000 | C             | -2.758397000 | 0.429446000  | -4.569687000 |
| C | 6.203417000  | -3.121565000 | 1.054255000  | H             | -3.213561000 | 2.754198000  | -2.176682000 |
| H | 6.519282000  | -1.403965000 | -0.232224000 | H             | -4.216014000 | 0.200811000  | -3.018507000 |
| H | 4.981936000  | -1.370543000 | 0.655633000  | H             | -4.384616000 | 1.701031000  | -3.882009000 |
| C | 7.104884000  | -4.109940000 | 0.302397000  | H             | -0.925358000 | -0.764059000 | -4.709942000 |
| H | 7.053321000  | -5.376135000 | -1.467621000 | H             | -1.937913000 | -1.126123000 | -3.304963000 |
| H | 5.538926000  | -5.316676000 | -0.571110000 | H             | -2.377263000 | 1.233490000  | -5.211734000 |
| H | 6.742428000  | -2.670445000 | 1.895437000  | H             | -3.354465000 | -0.238298000 | -5.203524000 |
| H | 5.343979000  | -3.655962000 | 1.481291000  | O             | 0.533096000  | 0.448880000  | -3.118968000 |
| H | 7.433790000  | -4.911508000 | 0.974370000  | C             | -0.625899000 | 2.694028000  | -1.797595000 |
| H | 8.012912000  | -3.588606000 | -0.034342000 | C             | -0.052224000 | 3.604637000  | -1.222765000 |
| O | -1.800238000 | -0.656377000 | -0.533393000 | C             | 0.596983000  | 4.590792000  | -0.424756000 |
| O | -4.006399000 | -1.088142000 | -0.896337000 | C             | 0.457597000  | 4.575953000  | 0.978620000  |
| N | -4.910008000 | 0.967731000  | -0.690506000 | C             | 1.408784000  | 5.583476000  | -1.007269000 |
| C | -2.945293000 | -0.230227000 | -0.608770000 | C             | 1.117597000  | 5.514505000  | 1.766715000  |
| C | -3.505508000 | 1.109556000  | -0.598200000 | H             | -0.172769000 | 3.821430000  | 1.438166000  |
| C | -5.140547000 | -0.286280000 | -0.896027000 | C             | 2.068569000  | 6.518238000  | -0.213197000 |
| C | -6.421906000 | -0.942356000 | -1.105096000 | H             | 1.513279000  | 5.604819000  | -2.087561000 |
| C | -6.509086000 | -2.335113000 | -1.252884000 | C             | 1.929229000  | 6.486980000  | 1.176167000  |
| C | -7.750031000 | -2.938305000 | -1.443555000 | H             | 1.001068000  | 5.484032000  | 2.846583000  |
| C | -8.909889000 | -2.163079000 | -1.490614000 | H             | 2.694453000  | 7.273836000  | -0.680230000 |
| C | -8.824863000 | -0.774736000 | -1.345032000 | H             | 2.446119000  | 7.215988000  | 1.793716000  |
| C | -7.590904000 | -0.164509000 | -1.153594000 | H             | 1.945779000  | 0.470208000  | -2.123545000 |
| C | -2.975400000 | 2.167953000  | 0.345216000  | H             | 5.127758000  | -0.844471000 | -2.189673000 |
| C | -3.040596000 | 1.765354000  | 1.801202000  | H             | 0.068012000  | -1.588708000 | 6.426490000  |
| C | -4.265843000 | 1.623286000  | 2.466447000  | <b>TS2-SR</b> |              |              |              |
| C | -4.302234000 | 1.249568000  | 3.809216000  | N             | -0.015492000 | -1.251425000 | 3.273050000  |
| C | -3.115032000 | 1.012051000  | 4.506691000  | N             | 0.246374000  | -1.638805000 | 0.974391000  |
| C | -1.891131000 | 1.143132000  | 3.852555000  | N             | 0.571073000  | 0.488074000  | 1.838404000  |
| C | -1.858978000 | 1.512895000  | 2.507621000  | C             | 0.280907000  | -0.801940000 | 2.012572000  |
| H | -5.604152000 | -2.931577000 | -1.216254000 | C             | 0.299573000  | 1.546583000  | 2.823697000  |
| H | -7.811382000 | -4.017074000 | -1.556151000 | H             | -0.561436000 | 1.270766000  | 3.437009000  |
| H | -9.875956000 | -2.636659000 | -1.640616000 | H             | 1.172009000  | 1.680948000  | 3.475790000  |
| H | -9.725316000 | -0.168104000 | -1.381907000 | C             | 0.087843000  | 2.770121000  | 1.937048000  |
| H | -7.505162000 | 0.910831000  | -1.039385000 | C             | 1.129283000  | 2.566979000  | 0.832265000  |
| H | -1.942628000 | 2.392555000  | 0.085957000  | H             | 2.117550000  | 2.882868000  | 1.182229000  |
| H | -3.559397000 | 3.079917000  | 0.174260000  | H             | 0.899049000  | 3.083081000  | -0.099076000 |
| H | -5.187353000 | 1.799441000  | 1.918851000  | C             | 1.124655000  | 1.038681000  | 0.589257000  |
| H | -5.259553000 | 1.141230000  | 4.312443000  | H             | 0.466834000  | 0.810634000  | -0.250844000 |
| H | -3.143869000 | 0.714931000  | 5.551351000  | H             | 0.215995000  | 3.709476000  | 2.479918000  |



|   |              |              |              |   |              |              |              |
|---|--------------|--------------|--------------|---|--------------|--------------|--------------|
| O | 3.218511000  | 0.024581000  | 1.259024000  | H | 1.157694000  | -5.652374000 | 0.979216000  |
| C | 2.546035000  | 0.501202000  | 0.344541000  | H | -0.869997000 | -6.806209000 | 0.117928000  |
| N | 2.955870000  | 0.664056000  | -0.932433000 | H | -1.196879000 | -5.461873000 | -0.973467000 |
| C | 4.295708000  | 0.450751000  | -1.383232000 | C | 0.933436000  | -1.096919000 | 4.401571000  |
| C | 4.813188000  | -0.851056000 | -1.482329000 | C | 0.347468000  | -1.810559000 | 5.621965000  |
| C | 6.119872000  | -1.007019000 | -1.961259000 | C | 2.333897000  | -1.621856000 | 4.056960000  |
| H | 6.541307000  | -2.005383000 | -2.037674000 | H | 1.007866000  | -0.032138000 | 4.639864000  |
| C | 6.878523000  | 0.090167000  | -2.350088000 | C | 1.288071000  | -1.688014000 | 6.828897000  |
| C | 6.343315000  | 1.373685000  | -2.255584000 | H | 0.209141000  | -2.875804000 | 5.377901000  |
| H | 6.943398000  | 2.224786000  | -2.559376000 | H | -0.643181000 | -1.401331000 | 5.853774000  |
| C | 5.051903000  | 1.579774000  | -1.766012000 | C | 3.271059000  | -1.490008000 | 5.264150000  |
| H | 2.327745000  | 1.196684000  | -1.561338000 | H | 2.248065000  | -2.682070000 | 3.773457000  |
| C | 4.005736000  | -2.076193000 | -1.089569000 | H | 2.729926000  | -1.081962000 | 3.190573000  |
| C | 4.613917000  | -2.745654000 | 0.154568000  | C | 2.698177000  | -2.197288000 | 6.499412000  |
| H | 2.998871000  | -1.741122000 | -0.831414000 | H | 0.868795000  | -2.235747000 | 7.680779000  |
| H | 5.633529000  | -3.095570000 | -0.045858000 | H | 1.344784000  | -0.632899000 | 7.132061000  |
| H | 4.643174000  | -2.033370000 | 0.982591000  | H | 4.258071000  | -1.893052000 | 5.011394000  |
| H | 4.021397000  | -3.617130000 | 0.460709000  | H | 3.420060000  | -0.424203000 | 5.489990000  |
| C | 4.492968000  | 2.981896000  | -1.564280000 | H | 3.359105000  | -2.057070000 | 7.362955000  |
| C | 4.735015000  | 3.417829000  | -0.105404000 | H | 2.654806000  | -3.279363000 | 6.308132000  |
| H | 3.413876000  | 2.948389000  | -1.734391000 | H | 0.125747000  | -1.260234000 | 0.026808000  |
| H | 5.808387000  | 3.545489000  | 0.080556000  | H | -0.447007000 | -2.166721000 | 3.266477000  |
| H | 4.235836000  | 4.371728000  | 0.103713000  | O | -0.569007000 | -1.161780000 | -1.672225000 |
| H | 4.367163000  | 2.668574000  | 0.602228000  | O | -2.030246000 | -0.050872000 | -0.350183000 |
| H | -0.919066000 | 2.758363000  | 1.515252000  | N | -3.825988000 | 0.175242000  | -1.686560000 |
| C | 5.057075000  | 4.022398000  | -2.539435000 | C | -1.688865000 | -0.677768000 | -1.540917000 |
| H | 4.935208000  | 3.700940000  | -3.579309000 | C | -2.800954000 | -0.451027000 | -2.452928000 |
| H | 4.526068000  | 4.972346000  | -2.414079000 | C | -3.328204000 | 0.421026000  | -0.527402000 |
| H | 6.121483000  | 4.219488000  | -2.365075000 | C | -3.946261000 | 1.092739000  | 0.601734000  |
| C | 3.869887000  | -3.065301000 | -2.258704000 | C | -3.268939000 | 1.218211000  | 1.823144000  |
| H | 3.235563000  | -3.912867000 | -1.972761000 | C | -3.868930000 | 1.883924000  | 2.888172000  |
| H | 3.418276000  | -2.581351000 | -3.131478000 | C | -5.150758000 | 2.418229000  | 2.750160000  |
| H | 4.842154000  | -3.468742000 | -2.563493000 | C | -5.835584000 | 2.280022000  | 1.538227000  |
| C | 0.055935000  | -3.090187000 | 1.061346000  | C | -5.238769000 | 1.625159000  | 0.466371000  |
| C | -1.430480000 | -3.481925000 | 0.999882000  | C | -3.249167000 | -1.564798000 | -3.378533000 |
| C | 0.848797000  | -3.778916000 | -0.053462000 | C | -3.687132000 | -2.818986000 | -2.641401000 |
| H | 0.481703000  | -3.420770000 | 2.017450000  | C | -4.699871000 | -2.784996000 | -1.671210000 |
| C | -1.595101000 | -5.004968000 | 1.090139000  | C | -5.085838000 | -3.947724000 | -1.005697000 |
| H | -1.848609000 | -3.120988000 | 0.052923000  | C | -4.479366000 | -5.169251000 | -1.308032000 |
| H | -1.993346000 | -2.980495000 | 1.798945000  | C | -3.477190000 | -5.215334000 | -2.277179000 |
| C | 0.697684000  | -5.301628000 | 0.043375000  | C | -3.078714000 | -4.046413000 | -2.928169000 |
| H | 0.479858000  | -3.420801000 | -1.022292000 | H | -2.277697000 | 0.794338000  | 1.923390000  |
| H | 1.897934000  | -3.486865000 | 0.025381000  | H | -3.332849000 | 1.991471000  | 3.826869000  |
| C | -0.777251000 | -5.718972000 | 0.005934000  | H | -5.615217000 | 2.940914000  | 3.581213000  |
| H | -2.655231000 | -5.261991000 | 0.994541000  | H | -6.833662000 | 2.694023000  | 1.427719000  |
| H | -1.268220000 | -5.350477000 | 2.082736000  | H | -5.747636000 | 1.523205000  | -0.486133000 |
| H | 1.251963000  | -5.778730000 | -0.773490000 | H | -2.437738000 | -1.832883000 | -4.057412000 |

|               |              |              |              |   |              |              |              |
|---------------|--------------|--------------|--------------|---|--------------|--------------|--------------|
| H             | -4.074368000 | -1.180134000 | -3.990192000 | H | 0.838194000  | -0.850286000 | 1.954929000  |
| H             | -5.179719000 | -1.839469000 | -1.441993000 | H | 3.811319000  | -2.263449000 | 4.289810000  |
| H             | -5.871377000 | -3.901715000 | -0.256079000 | O | 3.273113000  | -0.363225000 | -0.111603000 |
| H             | -4.790427000 | -6.077216000 | -0.798745000 | C | 2.423424000  | 0.001147000  | 0.704625000  |
| H             | -3.003648000 | -6.160712000 | -2.527195000 | N | 1.921577000  | 1.251489000  | 0.815659000  |
| H             | -2.289999000 | -4.086898000 | -3.675536000 | C | 2.531347000  | 2.404544000  | 0.222330000  |
| C             | -1.623170000 | 0.544653000  | -4.878540000 | C | 2.562449000  | 2.572514000  | -1.174648000 |
| C             | -2.074330000 | 1.128614000  | -3.555329000 | C | 3.177752000  | 3.717880000  | -1.690489000 |
| C             | -1.085906000 | 1.868556000  | -2.819644000 | H | 3.213970000  | 3.857659000  | -2.766695000 |
| C             | 0.310696000  | 1.651420000  | -3.021070000 | C | 3.711883000  | 4.691677000  | -0.855309000 |
| C             | 0.784007000  | 0.767286000  | -4.168498000 | C | 3.643999000  | 4.524745000  | 0.524305000  |
| C             | -0.274670000 | -0.169100000 | -4.756430000 | H | 4.048789000  | 5.291629000  | 1.177687000  |
| H             | -3.063416000 | 1.580218000  | -3.573531000 | C | 3.072541000  | 3.379832000  | 1.088729000  |
| H             | -1.529704000 | 1.389480000  | -5.578546000 | H | 1.253226000  | 1.416408000  | 1.588085000  |
| H             | -2.385424000 | -0.112904000 | -5.304850000 | C | 1.924456000  | 1.586632000  | -2.136837000 |
| H             | 1.659367000  | 0.205840000  | -3.822492000 | C | 2.986865000  | 0.888899000  | -3.002462000 |
| H             | 1.153624000  | 1.456117000  | -4.943202000 | H | 1.417776000  | 0.826182000  | -1.541279000 |
| H             | -0.379382000 | -1.037490000 | -4.099435000 | H | 3.505734000  | 1.610835000  | -3.644459000 |
| H             | 0.048401000  | -0.538861000 | -5.737113000 | H | 3.722564000  | 0.390884000  | -2.367894000 |
| O             | 1.194509000  | 2.224157000  | -2.327227000 | H | 2.520433000  | 0.142578000  | -3.658661000 |
| C             | -1.467340000 | 2.810724000  | -1.834890000 | C | 3.018695000  | 3.244611000  | 2.603839000  |
| C             | -1.744445000 | 3.660991000  | -1.004941000 | C | 4.391482000  | 3.475063000  | 3.255878000  |
| C             | -1.985124000 | 4.653772000  | -0.020048000 | H | 2.712164000  | 2.228557000  | 2.852156000  |
| C             | -0.972940000 | 5.579938000  | 0.315439000  | H | 4.739558000  | 4.506723000  | 3.131042000  |
| C             | -3.208354000 | 4.716781000  | 0.677771000  | H | 4.331901000  | 3.278115000  | 4.332572000  |
| C             | -1.175263000 | 6.515320000  | 1.325379000  | H | 5.151308000  | 2.812026000  | 2.826579000  |
| H             | -0.032461000 | 5.544600000  | -0.225371000 | H | 2.078980000  | -2.605604000 | 4.094874000  |
| C             | -3.401968000 | 5.658101000  | 1.683250000  | C | 1.950321000  | 4.183071000  | 3.191583000  |
| H             | -3.990107000 | 4.008505000  | 0.432576000  | H | 0.963903000  | 3.948678000  | 2.783021000  |
| C             | -2.388600000 | 6.559652000  | 2.018038000  | H | 1.896684000  | 4.062811000  | 4.279566000  |
| H             | -0.383018000 | 7.217900000  | 1.571208000  | H | 2.185013000  | 5.232017000  | 2.972033000  |
| H             | -4.349848000 | 5.679878000  | 2.214734000  | C | 0.862806000  | 2.268208000  | -3.015699000 |
| H             | -2.542779000 | 7.291189000  | 2.806332000  | H | 0.386781000  | 1.524094000  | -3.666595000 |
| H             | 7.887809000  | -0.051236000 | -2.727443000 | H | 0.092552000  | 2.752181000  | -2.410989000 |
| <b>TS2-RS</b> |              |              |              | H | 1.304607000  | 3.033492000  | -3.663240000 |
| N             | 2.602543000  | -3.847173000 | -0.347082000 | C | 0.039091000  | -2.898067000 | -1.519137000 |
| N             | 0.553790000  | -2.712049000 | -0.153976000 | C | -1.380648000 | -3.475960000 | -1.460984000 |
| N             | 2.234138000  | -2.360023000 | 1.396356000  | C | 0.094715000  | -1.564828000 | -2.275803000 |
| C             | 1.789875000  | -2.949582000 | 0.275224000  | H | 0.682151000  | -3.617156000 | -2.040146000 |
| C             | 3.227406000  | -2.962886000 | 2.296530000  | C | -1.991376000 | -3.583889000 | -2.862817000 |
| H             | 3.066843000  | -4.041941000 | 2.353689000  | H | -2.011146000 | -2.824324000 | -0.848501000 |
| H             | 4.251017000  | -2.781414000 | 1.945097000  | H | -1.364440000 | -4.450362000 | -0.961110000 |
| C             | 2.967595000  | -2.201449000 | 3.596767000  | C | -0.548854000 | -1.669013000 | -3.663319000 |
| C             | 2.707017000  | -0.776885000 | 3.094401000  | H | -0.430971000 | -0.819405000 | -1.672611000 |
| H             | 3.661462000  | -0.286822000 | 2.869460000  | H | 1.137028000  | -1.240984000 | -2.348704000 |
| H             | 2.147702000  | -0.137231000 | 3.775874000  | C | -1.974684000 | -2.228690000 | -3.580554000 |
| C             | 1.907430000  | -0.973803000 | 1.779906000  | H | -3.014801000 | -3.962948000 | -2.775278000 |

|   |              |              |              |               |              |              |              |
|---|--------------|--------------|--------------|---------------|--------------|--------------|--------------|
| H | -1.427231000 | -4.318739000 | -3.457149000 | H             | -5.404700000 | -1.314690000 | 2.503587000  |
| H | -0.552041000 | -0.681483000 | -4.138999000 | H             | -5.896660000 | -1.885066000 | -0.042989000 |
| H | 0.063122000  | -2.322705000 | -4.302684000 | H             | -6.006725000 | -3.761852000 | -1.660419000 |
| H | -2.401861000 | -2.324787000 | -4.585864000 | H             | -4.694471000 | -5.836226000 | -1.254422000 |
| H | -2.609760000 | -1.520120000 | -3.033399000 | H             | -3.277034000 | -6.014981000 | 0.782771000  |
| C | 3.968583000  | -3.453728000 | -0.768740000 | H             | -3.168292000 | -4.128708000 | 2.386800000  |
| C | 4.954339000  | -4.605267000 | -0.570795000 | C             | -3.369558000 | 0.294077000  | 4.318061000  |
| C | 3.956073000  | -2.958024000 | -2.220351000 | C             | -3.120779000 | 0.896330000  | 2.952090000  |
| H | 4.246622000  | -2.601971000 | -0.146547000 | C             | -1.806002000 | 1.424209000  | 2.703970000  |
| C | 6.364369000  | -4.193794000 | -1.018861000 | C             | -0.678806000 | 1.012618000  | 3.472812000  |
| H | 4.618897000  | -5.471463000 | -1.160813000 | C             | -0.898296000 | 0.186301000  | 4.735189000  |
| H | 4.952917000  | -4.918516000 | 0.479729000  | C             | -2.208518000 | -0.600137000 | 4.757327000  |
| C | 5.365505000  | -2.546307000 | -2.663920000 | H             | -3.936659000 | 1.504124000  | 2.569497000  |
| H | 3.580448000  | -3.760143000 | -2.875546000 | H             | -3.472372000 | 1.131218000  | 5.026355000  |
| H | 3.270922000  | -2.109222000 | -2.300631000 | H             | -4.322087000 | -0.242405000 | 4.346325000  |
| C | 6.370033000  | -3.689560000 | -2.468634000 | H             | -0.035195000 | -0.477575000 | 4.858441000  |
| H | 7.054159000  | -5.037795000 | -0.902162000 | H             | -0.866097000 | 0.890124000  | 5.580923000  |
| H | 6.729828000  | -3.394840000 | -0.357974000 | H             | -2.118912000 | -1.447380000 | 4.069245000  |
| H | 5.346143000  | -2.223351000 | -3.711147000 | H             | -2.395462000 | -1.008295000 | 5.758199000  |
| H | 5.677250000  | -1.674969000 | -2.072313000 | O             | 0.505802000  | 1.359157000  | 3.216888000  |
| H | 7.377928000  | -3.362164000 | -2.749826000 | C             | -1.594529000 | 2.337985000  | 1.641197000  |
| H | 6.109626000  | -4.520422000 | -3.140644000 | C             | -1.415315000 | 3.159833000  | 0.757152000  |
| O | -1.347023000 | -1.571516000 | 1.581945000  | C             | -1.237998000 | 4.121239000  | -0.274296000 |
| O | -2.148789000 | -0.263560000 | -0.099999000 | C             | -0.013025000 | 4.803466000  | -0.428109000 |
| N | -4.261065000 | 0.120403000  | 0.582038000  | C             | -2.285041000 | 4.410202000  | -1.175313000 |
| C | -2.281058000 | -0.932420000 | 1.105254000  | C             | 0.159937000  | 5.721836000  | -1.458678000 |
| C | -3.601716000 | -0.603866000 | 1.614307000  | H             | 0.799796000  | 4.595991000  | 0.256377000  |
| C | -3.390572000 | 0.330234000  | -0.339751000 | C             | -2.100864000 | 5.329588000  | -2.202134000 |
| C | -3.556431000 | 1.077491000  | -1.574658000 | H             | -3.231073000 | 3.891404000  | -1.069171000 |
| C | -2.484281000 | 1.291936000  | -2.450729000 | C             | -0.878046000 | 5.988653000  | -2.354040000 |
| C | -2.676665000 | 2.015968000  | -3.624105000 | H             | 1.118371000  | 6.221540000  | -1.563513000 |
| C | -3.933262000 | 2.537185000  | -3.930195000 | H             | -2.916802000 | 5.523950000  | -2.893068000 |
| C | -5.003833000 | 2.334763000  | -3.052568000 | H             | -0.736811000 | 6.702748000  | -3.160838000 |
| C | -4.820860000 | 1.609004000  | -1.881533000 | H             | -0.089324000 | -2.230738000 | 0.494056000  |
| C | -4.418194000 | -1.717058000 | 2.249700000  | H             | 2.127489000  | -4.438243000 | -1.018966000 |
| C | -4.542082000 | -2.887786000 | 1.292883000  | H             | 4.172734000  | 5.581205000  | -1.276540000 |
| C | -5.334019000 | -2.795365000 | 0.139503000  | <b>TS2-SS</b> |              |              |              |
| C | -5.385923000 | -3.848444000 | -0.772622000 | N             | 4.753499000  | 0.911554000  | 0.044138000  |
| C | -4.648305000 | -5.013432000 | -0.546245000 | N             | 2.944636000  | 0.052877000  | 1.268302000  |
| C | -3.854548000 | -5.113093000 | 0.596869000  | N             | 2.601930000  | 0.959693000  | -0.836877000 |
| C | -3.800235000 | -4.055479000 | 1.505671000  | C             | 3.420275000  | 0.607385000  | 0.159104000  |
| H | -1.501100000 | 0.924187000  | -2.191906000 | C             | 2.909082000  | 2.006841000  | -1.823701000 |
| H | -1.835287000 | 2.196302000  | -4.284978000 | H             | 3.586240000  | 2.740474000  | -1.384009000 |
| H | -4.078142000 | 3.108404000  | -4.842664000 | H             | 3.376539000  | 1.563129000  | -2.712067000 |
| H | -5.982226000 | 2.746465000  | -3.283383000 | C             | 1.524313000  | 2.555170000  | -2.164905000 |
| H | -5.637369000 | 1.445858000  | -1.186433000 | C             | 0.648761000  | 1.297564000  | -2.137811000 |
| H | -3.948561000 | -2.060571000 | 3.172968000  | H             | 0.762321000  | 0.740447000  | -3.075072000 |

|   |              |              |              |   |              |              |              |
|---|--------------|--------------|--------------|---|--------------|--------------|--------------|
| H | -0.409822000 | 1.503525000  | -1.982948000 | C | 3.753528000  | -2.639116000 | 4.514059000  |
| C | 1.220612000  | 0.468642000  | -0.963302000 | H | 3.746312000  | -0.827854000 | 5.720980000  |
| H | 0.652897000  | 0.682358000  | -0.056545000 | H | 5.136236000  | -0.983048000 | 4.652519000  |
| H | 1.509953000  | 3.064327000  | -3.132849000 | H | 3.874385000  | -4.143796000 | 2.946109000  |
| O | 2.176861000  | -1.627338000 | -1.721427000 | H | 5.215448000  | -3.003109000 | 2.960845000  |
| C | 1.189864000  | -1.033607000 | -1.291521000 | H | 4.293069000  | -3.237049000 | 5.258500000  |
| N | -0.042900000 | -1.566271000 | -1.132529000 | H | 2.681560000  | -2.818436000 | 4.676404000  |
| C | -0.480582000 | -2.818333000 | -1.663157000 | C | 5.562232000  | 0.432376000  | -1.099007000 |
| C | -0.012284000 | -4.027075000 | -1.119304000 | C | 7.004590000  | 0.903134000  | -0.899437000 |
| C | -0.489381000 | -5.222814000 | -1.667462000 | C | 5.480591000  | -1.090941000 | -1.270784000 |
| H | -0.133365000 | -6.167975000 | -1.267234000 | H | 5.176743000  | 0.906229000  | -2.006191000 |
| C | -1.419146000 | -5.221586000 | -2.702467000 | C | 7.899604000  | 0.431157000  | -2.053691000 |
| C | -1.888157000 | -4.013386000 | -3.210690000 | H | 7.386168000  | 0.487378000  | 0.046672000  |
| H | -2.615743000 | -4.015479000 | -4.017490000 | H | 7.029119000  | 1.995357000  | -0.804330000 |
| C | -1.428049000 | -2.793227000 | -2.706961000 | C | 6.373868000  | -1.555850000 | -2.427894000 |
| H | -0.768369000 | -0.949108000 | -0.765703000 | H | 5.813983000  | -1.565626000 | -0.335240000 |
| C | 0.968078000  | -4.060987000 | 0.040027000  | H | 4.439462000  | -1.384658000 | -1.439691000 |
| C | 2.315490000  | -4.653653000 | -0.402374000 | C | 7.823755000  | -1.090567000 | -2.240375000 |
| H | 1.133076000  | -3.032912000 | 0.363725000  | H | 8.933624000  | 0.747032000  | -1.872818000 |
| H | 2.195290000  | -5.682270000 | -0.763564000 | H | 7.578261000  | 0.926678000  | -2.980897000 |
| H | 2.744129000  | -4.048894000 | -1.205424000 | H | 6.326715000  | -2.647052000 | -2.516205000 |
| H | 3.021348000  | -4.678025000 | 0.436262000  | H | 5.979805000  | -1.151270000 | -3.371301000 |
| C | -1.927748000 | -1.487518000 | -3.310728000 | H | 8.438286000  | -1.395054000 | -3.095940000 |
| C | -1.408157000 | -1.322238000 | -4.749012000 | H | 8.249931000  | -1.583936000 | -1.354709000 |
| H | -1.523337000 | -0.661110000 | -2.724974000 | H | 1.917561000  | -0.019305000 | 1.420533000  |
| H | -1.793346000 | -2.112121000 | -5.404572000 | H | 5.247249000  | 0.812602000  | 0.922315000  |
| H | -1.722550000 | -0.356569000 | -5.162688000 | O | -1.888650000 | 0.380878000  | -0.307393000 |
| H | -0.313799000 | -1.371305000 | -4.777117000 | O | -4.021858000 | -0.325331000 | 0.119186000  |
| H | 1.214291000  | 3.265106000  | -1.393470000 | N | -4.846171000 | 1.459978000  | 1.223803000  |
| C | -3.458014000 | -1.364502000 | -3.243830000 | C | -2.980081000 | 0.602148000  | 0.188604000  |
| H | -3.807371000 | -1.439838000 | -2.210233000 | C | -3.463523000 | 1.680205000  | 1.032514000  |
| H | -3.775872000 | -0.391269000 | -3.635760000 | C | -5.104609000 | 0.293053000  | 0.728940000  |
| H | -3.955316000 | -2.142353000 | -3.835149000 | C | -6.370250000 | -0.423742000 | 0.726782000  |
| C | 0.390795000  | -4.821346000 | 1.244829000  | C | -6.492680000 | -1.679029000 | 0.110940000  |
| H | 1.077298000  | -4.754201000 | 2.097699000  | C | -7.718054000 | -2.341105000 | 0.121126000  |
| H | -0.572366000 | -4.399712000 | 1.549941000  | C | -8.825799000 | -1.763114000 | 0.743402000  |
| H | 0.239043000  | -5.884346000 | 1.023108000  | C | -8.704899000 | -0.513445000 | 1.359605000  |
| C | 3.699483000  | -0.741960000 | 2.245741000  | C | -7.486380000 | 0.154851000  | 1.354420000  |
| C | 3.339778000  | -0.284335000 | 3.665329000  | C | -3.008497000 | 3.105896000  | 0.785489000  |
| C | 3.407507000  | -2.234480000 | 2.043069000  | C | -3.094799000 | 3.481646000  | -0.678728000 |
| H | 4.772349000  | -0.579813000 | 2.087007000  | C | -4.322091000 | 3.490437000  | -1.354665000 |
| C | 4.049801000  | -1.146805000 | 4.716998000  | C | -4.378179000 | 3.776624000  | -2.717834000 |
| H | 2.252897000  | -0.366276000 | 3.779874000  | C | -3.207996000 | 4.059104000  | -3.427490000 |
| H | 3.595917000  | 0.775269000  | 3.788890000  | C | -1.982372000 | 4.055701000  | -2.761956000 |
| C | 4.126114000  | -3.086786000 | 3.094552000  | C | -1.929711000 | 3.766678000  | -1.397516000 |
| H | 2.324760000  | -2.373403000 | 2.122268000  | H | -5.629217000 | -2.125740000 | -0.369467000 |
| H | 3.698610000  | -2.522172000 | 1.027785000  | H | -7.807180000 | -3.311988000 | -0.357758000 |

|             |              |              |              |   |              |              |              |
|-------------|--------------|--------------|--------------|---|--------------|--------------|--------------|
| H           | -9.779481000 | -2.283176000 | 0.750117000  | C | 0.420691000  | 1.105056000  | -2.252883000 |
| H           | -9.564699000 | -0.061494000 | 1.845997000  | H | 0.592657000  | 0.530136000  | -3.169767000 |
| H           | -7.372759000 | 1.123926000  | 1.828535000  | H | -0.651635000 | 1.149060000  | -2.068543000 |
| H           | -1.979852000 | 3.231944000  | 1.126612000  | C | 1.154716000  | 0.427187000  | -1.071833000 |
| H           | -3.645302000 | 3.756042000  | 1.396623000  | H | 0.624920000  | 0.633581000  | -0.140051000 |
| H           | -5.230393000 | 3.256829000  | -0.806053000 | H | 0.953591000  | 2.944173000  | -3.341130000 |
| H           | -5.337100000 | 3.777855000  | -3.229280000 | O | 2.250863000  | -1.576847000 | -1.882182000 |
| H           | -3.253589000 | 4.279868000  | -4.490390000 | C | 1.279418000  | -1.084344000 | -1.314084000 |
| H           | -1.064917000 | 4.272887000  | -3.303044000 | N | 0.175423000  | -1.760507000 | -0.916771000 |
| H           | -0.974725000 | 3.749689000  | -0.881479000 | C | -0.136424000 | -3.121333000 | -1.234182000 |
| C           | -3.315271000 | 0.122848000  | 3.457143000  | C | 0.569319000  | -4.174248000 | -0.626847000 |
| C           | -2.467346000 | 1.174541000  | 2.749787000  | C | 0.201505000  | -5.484869000 | -0.956783000 |
| C           | -1.090566000 | 0.862011000  | 2.448884000  | H | 0.739524000  | -6.313755000 | -0.506302000 |
| C           | -0.652660000 | -0.490443000 | 2.314049000  | C | -0.841800000 | -5.742225000 | -1.837974000 |
| C           | -1.650767000 | -1.579134000 | 2.661179000  | C | -1.535506000 | -4.684182000 | -2.421182000 |
| C           | -2.527544000 | -1.136290000 | 3.834365000  | H | -2.344717000 | -4.892301000 | -3.113817000 |
| H           | -2.617875000 | 2.183379000  | 3.126285000  | C | -1.194110000 | -3.359783000 | -2.137950000 |
| H           | -4.165420000 | -0.171824000 | 2.833368000  | H | -0.554204000 | -1.207319000 | -0.478366000 |
| H           | -3.765004000 | 0.576092000  | 4.348322000  | C | 1.711481000  | -3.933501000 | 0.344926000  |
| H           | -1.086379000 | -2.489437000 | 2.883046000  | C | 3.050814000  | -4.318766000 | -0.307182000 |
| H           | -2.276052000 | -1.790007000 | 1.781032000  | H | 1.727809000  | -2.868676000 | 0.582479000  |
| H           | -1.883525000 | -0.930160000 | 4.698812000  | H | 3.058356000  | -5.379812000 | -0.585687000 |
| H           | -3.219604000 | -1.933816000 | 4.129243000  | H | 3.218737000  | -3.719744000 | -1.205197000 |
| O           | 0.508496000  | -0.832472000 | 1.963044000  | H | 3.880963000  | -4.153548000 | 0.389396000  |
| C           | -0.169829000 | 1.885995000  | 2.140799000  | C | -1.885676000 | -2.206106000 | -2.850603000 |
| C           | 0.639448000  | 2.754750000  | 1.851499000  | C | -1.155427000 | -1.912528000 | -4.174626000 |
| C           | 1.526771000  | 3.762187000  | 1.393120000  | H | -1.801471000 | -1.316600000 | -2.226194000 |
| C           | 2.924165000  | 3.571194000  | 1.429570000  | H | -1.243996000 | -2.761718000 | -4.862901000 |
| C           | 1.033670000  | 4.966555000  | 0.843337000  | H | -1.579761000 | -1.028005000 | -4.665258000 |
| C           | 3.787664000  | 4.523122000  | 0.897013000  | H | -0.088286000 | -1.736839000 | -4.001771000 |
| H           | 3.312251000  | 2.663756000  | 1.876641000  | H | 0.719340000  | 3.160539000  | -1.593528000 |
| C           | 1.905128000  | 5.916857000  | 0.319839000  | C | -3.386814000 | -2.430571000 | -3.076665000 |
| H           | -0.037987000 | 5.136381000  | 0.822343000  | H | -3.892588000 | -2.668442000 | -2.134634000 |
| C           | 3.285562000  | 5.698905000  | 0.332724000  | H | -3.839430000 | -1.518937000 | -3.483030000 |
| H           | 4.859601000  | 4.345254000  | 0.923886000  | H | -3.586415000 | -3.240819000 | -3.787457000 |
| H           | 1.503364000  | 6.832182000  | -0.106220000 | C | 1.509208000  | -4.684278000 | 1.670543000  |
| H           | 3.961397000  | 6.440745000  | -0.082522000 | H | 2.298088000  | -4.408091000 | 2.380124000  |
| H           | -1.781574000 | -6.161473000 | -3.110441000 | H | 0.545771000  | -4.435255000 | 2.124360000  |
| <b>INT4</b> |              |              |              | H | 1.552071000  | -5.771647000 | 1.536756000  |
| N           | 4.642617000  | 1.421741000  | -0.332764000 | C | 4.021148000  | -0.165797000 | 2.055164000  |
| N           | 3.077856000  | 0.332365000  | 1.044280000  | C | 3.657411000  | 0.419202000  | 3.427321000  |
| N           | 2.467964000  | 1.089118000  | -1.066543000 | C | 4.006705000  | -1.699389000 | 2.074217000  |
| C           | 3.384451000  | 0.914843000  | -0.104844000 | H | 5.035801000  | 0.157339000  | 1.793653000  |
| C           | 2.559020000  | 2.148646000  | -2.086373000 | C | 4.567309000  | -0.144453000 | 4.526253000  |
| H           | 3.139249000  | 2.985716000  | -1.696253000 | H | 2.611377000  | 0.164517000  | 3.629549000  |
| H           | 3.041156000  | 1.760352000  | -2.992474000 | H | 3.721185000  | 1.513879000  | 3.392483000  |
| C           | 1.092650000  | 2.477316000  | -2.361546000 | C | 4.922814000  | -2.249890000 | 3.172538000  |

|   |              |              |              |                            |               |              |              |
|---|--------------|--------------|--------------|----------------------------|---------------|--------------|--------------|
| H | 2.974005000  | -2.014954000 | 2.249225000  | H                          | -6.031104000  | -1.375561000 | -1.436138000 |
| H | 4.302877000  | -2.070694000 | 1.087628000  | H                          | -8.346595000  | -2.170965000 | -1.850777000 |
| C | 4.542012000  | -1.678677000 | 4.544516000  | H                          | -10.155078000 | -1.622031000 | -0.239435000 |
| H | 4.260487000  | 0.256765000  | 5.499321000  | H                          | -9.646595000  | -0.277905000 | 1.788022000  |
| H | 5.600597000  | 0.196663000  | 4.359728000  | H                          | -7.317187000  | 0.515004000  | 2.196732000  |
| H | 4.866734000  | -3.345203000 | 3.182668000  | H                          | -2.113530000  | 2.841880000  | 1.421253000  |
| H | 5.969812000  | -1.992761000 | 2.949891000  | H                          | -3.749296000  | 3.073947000  | 2.048928000  |
| H | 5.217775000  | -2.060337000 | 5.319620000  | H                          | -5.687217000  | 3.203746000  | 0.359004000  |
| H | 3.530298000  | -2.018603000 | 4.805739000  | H                          | -6.359414000  | 3.900916000  | -1.923932000 |
| C | 5.436716000  | 0.972570000  | -1.499523000 | H                          | -4.641373000  | 4.182669000  | -3.697682000 |
| C | 6.826836000  | 1.605685000  | -1.406624000 | H                          | -2.243605000  | 3.769492000  | -3.168539000 |
| C | 5.516438000  | -0.557647000 | -1.598142000 | H                          | -1.587311000  | 3.061606000  | -0.884588000 |
| H | 4.954032000  | 1.355039000  | -2.403851000 | C                          | -3.077024000  | -0.863154000 | 3.056123000  |
| C | 7.705220000  | 1.176972000  | -2.589958000 | C                          | -2.492305000  | 0.503969000  | 2.643176000  |
| H | 7.302700000  | 1.280727000  | -0.467719000 | C                          | -0.996242000  | 0.433609000  | 2.351166000  |
| H | 6.735134000  | 2.697489000  | -1.360429000 | C                          | -0.250960000  | -0.755483000 | 2.432204000  |
| C | 6.392747000  | -0.980765000 | -2.783920000 | C                          | -0.879381000  | -2.005659000 | 3.025178000  |
| H | 5.949349000  | -0.945469000 | -0.663465000 | C                          | -2.099340000  | -1.688548000 | 3.884194000  |
| H | 4.508255000  | -0.974598000 | -1.693856000 | H                          | -2.679073000  | 1.218001000  | 3.458837000  |
| C | 7.789761000  | -0.351400000 | -2.703631000 | H                          | -3.324231000  | -1.447617000 | 2.157353000  |
| H | 8.705791000  | 1.612405000  | -2.484858000 | H                          | -4.020746000  | -0.699539000 | 3.583687000  |
| H | 7.280867000  | 1.586842000  | -3.517563000 | H                          | -0.093888000  | -2.517036000 | 3.592151000  |
| H | 6.462926000  | -2.073700000 | -2.820354000 | H                          | -1.159200000  | -2.686008000 | 2.206235000  |
| H | 5.905956000  | -0.669972000 | -3.719568000 | H                          | -1.791133000  | -1.125758000 | 4.775483000  |
| H | 8.387371000  | -0.630755000 | -3.579583000 | H                          | -2.581804000  | -2.609210000 | 4.234631000  |
| H | 8.315362000  | -0.749480000 | -1.823439000 | O                          | 0.965933000   | -0.867456000 | 2.061799000  |
| H | 2.086542000  | 0.086342000  | 1.293322000  | C                          | -0.285520000  | 1.586664000  | 1.982942000  |
| H | 5.202781000  | 1.450336000  | 0.509461000  | C                          | 0.362095000   | 2.576102000  | 1.658277000  |
| O | -2.008453000 | 0.153139000  | -0.443182000 | C                          | 1.043865000   | 3.710126000  | 1.153780000  |
| O | -4.212142000 | -0.278038000 | -0.259178000 | C                          | 2.455436000   | 3.771499000  | 1.144936000  |
| N | -4.784666000 | 0.823589000  | 1.641182000  | C                          | 0.333782000   | 4.802791000  | 0.601934000  |
| C | -3.039516000 | 0.307560000  | 0.161400000  | C                          | 3.122002000   | 4.847437000  | 0.568390000  |
| C | -3.351902000 | 1.072450000  | 1.440206000  | H                          | 3.011733000   | 2.957587000  | 1.593644000  |
| C | -5.186531000 | 0.099460000  | 0.672271000  | C                          | 1.009652000   | 5.879007000  | 0.036060000  |
| C | -6.539089000 | -0.383941000 | 0.408362000  | H                          | -0.751171000  | 4.786143000  | 0.609050000  |
| C | -6.824848000 | -1.141715000 | -0.735611000 | C                          | 2.406900000   | 5.907026000  | 0.003290000  |
| C | -8.126235000 | -1.583988000 | -0.964086000 | H                          | 4.209069000   | 4.859097000  | 0.562788000  |
| C | -9.141848000 | -1.274786000 | -0.058306000 | H                          | 0.439726000   | 6.701006000  | -0.389182000 |
| C | -8.856512000 | -0.518420000 | 1.082753000  | H                          | 2.929535000   | 6.746505000  | -0.445735000 |
| C | -7.561101000 | -0.072577000 | 1.318098000  | H                          | -1.115777000  | -6.767274000 | -2.073349000 |
| C | -3.161494000 | 2.605047000  | 1.253685000  | <b>TS3-SSS<sub>a</sub></b> |               |              |              |
| C | -3.589856000 | 3.092987000  | -0.107361000 | N                          | -3.816353000  | 1.109156000  | -1.524270000 |
| C | -4.935321000 | 3.331050000  | -0.414407000 | N                          | -2.405879000  | 0.630446000  | 0.272782000  |
| C | -5.311467000 | 3.720413000  | -1.700331000 | N                          | -1.507058000  | 1.282201000  | -1.774182000 |
| C | -4.346907000 | 3.878744000  | -2.696995000 | C                          | -2.564682000  | 1.030181000  | -0.987180000 |
| C | -3.002689000 | 3.646798000  | -2.400468000 | C                          | -1.548165000  | 1.241070000  | -3.244604000 |
| C | -2.629691000 | 3.255626000  | -1.115738000 | H                          | -2.334708000  | 0.563732000  | -3.573874000 |

|   |              |              |              |   |              |              |              |
|---|--------------|--------------|--------------|---|--------------|--------------|--------------|
| H | -1.738138000 | 2.246570000  | -3.641729000 | H | -3.395520000 | -1.211562000 | 1.984306000  |
| C | -0.142127000 | 0.772621000  | -3.609253000 | C | -4.147571000 | 2.521488000  | 3.105280000  |
| C | 0.718898000  | 1.489893000  | -2.566794000 | H | -2.122224000 | 2.270188000  | 2.378647000  |
| H | 0.873118000  | 2.534465000  | -2.860879000 | H | -3.190746000 | 3.030691000  | 1.208467000  |
| H | 1.696975000  | 1.036536000  | -2.406369000 | C | -4.092379000 | 1.418912000  | 4.171225000  |
| C | -0.133404000 | 1.435355000  | -1.274701000 | H | -4.187878000 | -0.751519000 | 4.298358000  |
| H | 0.154155000  | 0.569836000  | -0.673152000 | H | -5.300103000 | -0.041129000 | 3.133122000  |
| H | 0.126365000  | 1.032922000  | -4.637080000 | H | -3.953874000 | 3.503815000  | 3.553343000  |
| O | -0.771210000 | 3.645697000  | -0.503936000 | H | -5.163074000 | 2.566875000  | 2.682740000  |
| C | 0.050005000  | 2.735833000  | -0.474148000 | H | -4.849755000 | 1.598580000  | 4.944553000  |
| N | 1.247444000  | 2.775826000  | 0.164119000  | H | -3.113335000 | 1.452070000  | 4.671003000  |
| C | 1.867705000  | 3.945242000  | 0.709810000  | C | -4.313019000 | 2.268689000  | -2.292149000 |
| C | 1.363454000  | 4.538801000  | 1.881249000  | C | -5.798563000 | 2.054574000  | -2.589046000 |
| C | 2.023912000  | 5.666336000  | 2.382613000  | C | -4.076532000 | 3.599514000  | -1.564898000 |
| H | 1.644183000  | 6.144905000  | 3.280530000  | H | -3.788011000 | 2.301604000  | -3.251949000 |
| C | 3.158368000  | 6.176390000  | 1.760715000  | C | -6.362467000 | 3.223511000  | -3.407024000 |
| C | 3.650395000  | 5.564935000  | 0.611498000  | H | -6.342911000 | 1.976600000  | -1.637083000 |
| H | 4.534445000  | 5.967125000  | 0.124936000  | H | -5.941319000 | 1.101540000  | -3.110258000 |
| C | 3.015832000  | 4.447093000  | 0.062238000  | C | -4.630794000 | 4.767979000  | -2.389827000 |
| H | 1.832857000  | 1.951586000  | 0.079450000  | H | -4.591162000 | 3.558332000  | -0.594198000 |
| C | 0.138133000  | 4.003967000  | 2.601656000  | H | -3.009282000 | 3.732799000  | -1.358822000 |
| C | -1.032782000 | 4.992258000  | 2.467743000  | C | -6.118210000 | 4.569540000  | -2.710687000 |
| H | -0.142948000 | 3.061471000  | 2.128436000  | H | -7.433830000 | 3.069046000  | -3.581176000 |
| H | -0.775152000 | 5.963675000  | 2.906806000  | H | -5.883278000 | 3.234538000  | -4.396560000 |
| H | -1.283193000 | 5.138330000  | 1.414706000  | H | -4.474827000 | 5.709072000  | -1.850474000 |
| H | -1.918398000 | 4.615386000  | 2.990777000  | H | -4.063544000 | 4.850108000  | -3.328654000 |
| C | 3.554310000  | 3.835768000  | -1.223857000 | H | -6.488873000 | 5.390645000  | -3.335911000 |
| C | 3.345604000  | 4.796740000  | -2.406835000 | H | -6.694846000 | 4.600226000  | -1.774915000 |
| H | 2.985776000  | 2.931290000  | -1.439707000 | H | -1.462204000 | 0.397598000  | 0.615901000  |
| H | 3.906763000  | 5.727960000  | -2.267317000 | H | -4.527210000 | 0.639939000  | -0.974166000 |
| H | 3.684332000  | 4.335799000  | -3.342523000 | O | 3.087375000  | 0.561879000  | -0.407956000 |
| H | 2.287295000  | 5.059772000  | -2.513310000 | O | 5.224997000  | -0.060284000 | -0.046975000 |
| H | -0.076096000 | -0.312326000 | -3.495951000 | N | 5.028790000  | -2.265891000 | 0.462843000  |
| C | 5.025076000  | 3.409817000  | -1.092994000 | C | 3.877223000  | -0.307180000 | -0.134056000 |
| H | 5.150987000  | 2.695482000  | -0.274148000 | C | 3.675299000  | -1.787182000 | 0.175164000  |
| H | 5.361752000  | 2.924954000  | -2.016720000 | C | 5.822455000  | -1.281951000 | 0.300463000  |
| H | 5.681220000  | 4.267765000  | -0.906269000 | C | 7.276682000  | -1.267232000 | 0.419086000  |
| C | 0.430199000  | 3.693913000  | 4.078922000  | C | 8.011535000  | -0.102308000 | 0.159465000  |
| H | -0.438094000 | 3.205083000  | 4.536918000  | C | 9.400154000  | -0.123435000 | 0.269901000  |
| H | 1.290677000  | 3.025501000  | 4.182887000  | C | 10.056815000 | -1.298698000 | 0.637650000  |
| H | 0.639556000  | 4.603231000  | 4.654316000  | C | 9.323328000  | -2.460845000 | 0.896332000  |
| C | -3.372614000 | 0.870359000  | 1.361528000  | C | 7.937711000  | -2.449077000 | 0.787902000  |
| C | -3.258936000 | -0.221514000 | 2.426727000  | C | 3.133434000  | -2.517517000 | -1.077162000 |
| C | -3.141435000 | 2.255119000  | 1.979329000  | C | 3.886989000  | -2.208382000 | -2.347599000 |
| H | -4.382747000 | 0.832173000  | 0.940428000  | C | 5.163233000  | -2.731855000 | -2.595262000 |
| C | -4.279812000 | 0.032507000  | 3.542299000  | C | 5.856238000  | -2.389925000 | -3.755909000 |
| H | -2.247221000 | -0.197781000 | 2.845584000  | C | 5.281672000  | -1.525648000 | -4.689969000 |

|   |              |              |              |                            |              |              |              |
|---|--------------|--------------|--------------|----------------------------|--------------|--------------|--------------|
| C | 4.004748000  | -1.012489000 | -4.461200000 | C                          | -4.258381000 | -3.387566000 | -0.129142000 |
| C | 3.314890000  | -1.353920000 | -3.298505000 | C                          | -5.362979000 | -2.556450000 | -0.582040000 |
| H | 7.494320000  | 0.805737000  | -0.129238000 | C                          | -5.867848000 | -2.672535000 | -1.887688000 |
| H | 9.969517000  | 0.778802000  | 0.067871000  | C                          | -6.887662000 | -1.826990000 | -2.322899000 |
| H | 11.139585000 | -1.311070000 | 0.722898000  | C                          | -7.416630000 | -0.857557000 | -1.468983000 |
| H | 9.834586000  | -3.375081000 | 1.182567000  | C                          | -6.917421000 | -0.738479000 | -0.165777000 |
| H | 7.349345000  | -3.339043000 | 0.984065000  | C                          | -5.901892000 | -1.579531000 | 0.277132000  |
| H | 2.093693000  | -2.219869000 | -1.193897000 | C                          | -1.794597000 | -4.670305000 | 2.084968000  |
| H | 3.152739000  | -3.588220000 | -0.846613000 | C                          | -1.898049000 | -3.785409000 | 3.305977000  |
| H | 5.612138000  | -3.404539000 | -1.871558000 | C                          | -0.900358000 | -2.856351000 | 3.615027000  |
| H | 6.846024000  | -2.801688000 | -3.932460000 | C                          | -1.006928000 | -2.038705000 | 4.741131000  |
| H | 5.823303000  | -1.260929000 | -5.593699000 | C                          | -2.112194000 | -2.147458000 | 5.584885000  |
| H | 3.543091000  | -0.349354000 | -5.187683000 | C                          | -3.115356000 | -3.071940000 | 5.285512000  |
| H | 2.314618000  | -0.968731000 | -3.127862000 | C                          | -3.009224000 | -3.876874000 | 4.152428000  |
| C | 3.496126000  | -1.460183000 | 2.684728000  | H                          | -5.447616000 | -3.422601000 | -2.548154000 |
| C | 2.745916000  | -1.978244000 | 1.431780000  | H                          | -7.272763000 | -1.928253000 | -3.333947000 |
| C | 1.360846000  | -1.356360000 | 1.245420000  | H                          | -8.212452000 | -0.202332000 | -1.810944000 |
| C | 0.925214000  | -0.207146000 | 2.010441000  | H                          | -7.332991000 | 0.003723000  | 0.511201000  |
| C | 1.730644000  | 0.192672000  | 3.233420000  | H                          | -5.518738000 | -1.507794000 | 1.288125000  |
| C | 2.558925000  | -0.968221000 | 3.781666000  | H                          | -0.741602000 | -4.871023000 | 1.850990000  |
| H | 2.629671000  | -3.065109000 | 1.521960000  | H                          | -2.249106000 | -5.645800000 | 2.306082000  |
| H | 4.144031000  | -0.615879000 | 2.411600000  | H                          | -0.040148000 | -2.764873000 | 2.960198000  |
| H | 4.163850000  | -2.247215000 | 3.045140000  | H                          | -0.224080000 | -1.319273000 | 4.963239000  |
| H | 1.019595000  | 0.590732000  | 3.963441000  | H                          | -2.193428000 | -1.516799000 | 6.466048000  |
| H | 2.391545000  | 1.028115000  | 2.956204000  | H                          | -3.982032000 | -3.164632000 | 5.934876000  |
| H | 1.899416000  | -1.778750000 | 4.115121000  | H                          | -3.796228000 | -4.588309000 | 3.916897000  |
| H | 3.138388000  | -0.648055000 | 4.655232000  | H                          | -1.377733000 | -3.190752000 | 0.359481000  |
| O | -0.109627000 | 0.444303000  | 1.757701000  | <b>TS3-SSR<sub>a</sub></b> |              |              |              |
| C | 0.462734000  | -1.902488000 | 0.382685000  | N                          | -3.788615000 | 1.111383000  | -1.503646000 |
| C | -0.467532000 | -2.453597000 | -0.287768000 | N                          | -2.253836000 | 1.093828000  | 0.272722000  |
| C | -0.861484000 | -2.449259000 | -1.704464000 | N                          | -1.517065000 | 1.128648000  | -1.944754000 |
| C | -2.135420000 | -1.983697000 | -2.062218000 | C                          | -2.497853000 | 1.113450000  | -1.035729000 |
| C | -0.039913000 | -2.984345000 | -2.710429000 | C                          | -1.693022000 | 0.690987000  | -3.337489000 |
| C | -2.565320000 | -2.019015000 | -3.385868000 | H                          | -2.498301000 | -0.042909000 | -3.387942000 |
| H | -2.790861000 | -1.608114000 | -1.287808000 | H                          | -1.942411000 | 1.549321000  | -3.973878000 |
| C | -0.467820000 | -3.010940000 | -4.036982000 | C                          | -0.315276000 | 0.135484000  | -3.699111000 |
| H | 0.921751000  | -3.409434000 | -2.450141000 | C                          | 0.639170000  | 1.068050000  | -2.941809000 |
| C | -1.729801000 | -2.523431000 | -4.383906000 | H                          | 0.816082000  | 1.980490000  | -3.522099000 |
| H | -3.563907000 | -1.663880000 | -3.625587000 | H                          | 1.605454000  | 0.616128000  | -2.714135000 |
| H | 0.185237000  | -3.427748000 | -4.798561000 | C                          | -0.116678000 | 1.425323000  | -1.636066000 |
| H | -2.065080000 | -2.557803000 | -5.416510000 | H                          | 0.234279000  | 0.799489000  | -0.814842000 |
| H | 3.659199000  | 7.049206000  | 2.170846000  | H                          | -0.143791000 | 0.144927000  | -4.779500000 |
| O | -2.003198000 | -5.808895000 | -0.834957000 | O                          | -0.736322000 | 3.754226000  | -1.780364000 |
| O | -3.780718000 | -4.348605000 | -0.987207000 | C                          | 0.050036000  | 2.921744000  | -1.337038000 |
| N | -3.580091000 | -3.236039000 | 0.963193000  | N                          | 1.172172000  | 3.194949000  | -0.632783000 |
| C | -2.630102000 | -4.898354000 | -0.346224000 | C                          | 1.661151000  | 4.491248000  | -0.293982000 |
| C | -2.451256000 | -4.074078000 | 0.849192000  | C                          | 0.898786000  | 5.357862000  | 0.516043000  |



|   |              |              |              |   |              |              |              |
|---|--------------|--------------|--------------|---|--------------|--------------|--------------|
| C | 1.439311000  | 6.614709000  | 0.810646000  | C | -4.139908000 | 3.585810000  | -1.609828000 |
| H | 0.863299000  | 7.307054000  | 1.417481000  | H | -3.668756000 | 2.274378000  | -3.239263000 |
| C | 2.702559000  | 6.987331000  | 0.362407000  | C | -6.286678000 | 3.103535000  | -3.589682000 |
| C | 3.454027000  | 6.100295000  | -0.401872000 | H | -6.335662000 | 1.835828000  | -1.832968000 |
| H | 4.445030000  | 6.387846000  | -0.741508000 | H | -5.775238000 | 1.006151000  | -3.285002000 |
| C | 2.946264000  | 4.846162000  | -0.752619000 | C | -4.695681000 | 4.725497000  | -2.471500000 |
| H | 1.724862000  | 2.394809000  | -0.348921000 | H | -4.698515000 | 3.536846000  | -0.662941000 |
| C | -0.459925000 | 4.977874000  | 1.088349000  | H | -3.086832000 | 3.763104000  | -1.372494000 |
| C | -1.584693000 | 5.798856000  | 0.434340000  | C | -6.150338000 | 4.457110000  | -2.878664000 |
| H | -0.630892000 | 3.921606000  | 0.879009000  | H | -7.335726000 | 2.901070000  | -3.835764000 |
| H | -1.486976000 | 6.863877000  | 0.678935000  | H | -5.742712000 | 3.141226000  | -4.544330000 |
| H | -1.557189000 | 5.682313000  | -0.650354000 | H | -4.613654000 | 5.673930000  | -1.928477000 |
| H | -2.563314000 | 5.461503000  | 0.798816000  | H | -4.074738000 | 4.828689000  | -3.372682000 |
| C | 3.787750000  | 3.901356000  | -1.599841000 | H | -6.522657000 | 5.260324000  | -3.525767000 |
| C | 4.177042000  | 4.538903000  | -2.943501000 | H | -6.783430000 | 4.457513000  | -1.979368000 |
| H | 3.189551000  | 3.016024000  | -1.825779000 | H | -1.292510000 | 0.994462000  | 0.633474000  |
| H | 4.816609000  | 5.417916000  | -2.803975000 | H | -4.465277000 | 0.822899000  | -0.808844000 |
| H | 4.728864000  | 3.820192000  | -3.560685000 | O | 2.854868000  | 0.697685000  | -0.414699000 |
| H | 3.287681000  | 4.857167000  | -3.497634000 | O | 4.986749000  | -0.018063000 | -0.243760000 |
| H | -0.225958000 | -0.884940000 | -3.324419000 | N | 4.833901000  | -1.726341000 | 1.246352000  |
| C | 5.030176000  | 3.423173000  | -0.829308000 | C | 3.648510000  | -0.075201000 | 0.064942000  |
| H | 4.750347000  | 2.943526000  | 0.114057000  | C | 3.470579000  | -1.232993000 | 1.045074000  |
| H | 5.590639000  | 2.690765000  | -1.421027000 | C | 5.602113000  | -1.037067000 | 0.499915000  |
| H | 5.698547000  | 4.260309000  | -0.595832000 | C | 7.043972000  | -1.174980000 | 0.318187000  |
| C | -0.495180000 | 5.136419000  | 2.617629000  | C | 7.750652000  | -0.322529000 | -0.540535000 |
| H | -1.466605000 | 4.810568000  | 3.007023000  | C | 9.125768000  | -0.483485000 | -0.696396000 |
| H | 0.278490000  | 4.531420000  | 3.099542000  | C | 9.797318000  | -1.489731000 | -0.000791000 |
| H | -0.351129000 | 6.178339000  | 2.925279000  | C | 9.091887000  | -2.340598000 | 0.855876000  |
| C | -3.295426000 | 1.213082000  | 1.310232000  | C | 7.719946000  | -2.186867000 | 1.016904000  |
| C | -3.963770000 | -0.142787000 | 1.584721000  | C | 2.613075000  | -2.338154000 | 0.380029000  |
| C | -2.698746000 | 1.789970000  | 2.598220000  | C | 3.163143000  | -2.803865000 | -0.947003000 |
| H | -4.047219000 | 1.923194000  | 0.940777000  | C | 4.203952000  | -3.739245000 | -1.014530000 |
| C | -5.022047000 | -0.044102000 | 2.688808000  | C | 4.701782000  | -4.160704000 | -2.246917000 |
| H | -3.183443000 | -0.851013000 | 1.879088000  | C | 4.166867000  | -3.649177000 | -3.431124000 |
| H | -4.418284000 | -0.543976000 | 0.674161000  | C | 3.130971000  | -2.715934000 | -3.373693000 |
| C | -3.778176000 | 1.918046000  | 3.680088000  | C | 2.633304000  | -2.296417000 | -2.140447000 |
| H | -1.901630000 | 1.126110000  | 2.947299000  | H | 7.221123000  | 0.455704000  | -1.078337000 |
| H | -2.232732000 | 2.756135000  | 2.387200000  | H | 9.672776000  | 0.177327000  | -1.362201000 |
| C | -4.442627000 | 0.566167000  | 3.969634000  | H | 10.869392000 | -1.612698000 | -0.125167000 |
| H | -5.427420000 | -1.042720000 | 2.886880000  | H | 9.614409000  | -3.124070000 | 1.396675000  |
| H | -5.861190000 | 0.573581000  | 2.333828000  | H | 7.152791000  | -2.835688000 | 1.675607000  |
| H | -3.328848000 | 2.326412000  | 4.593099000  | H | 1.603471000  | -1.948549000 | 0.242764000  |
| H | -4.540781000 | 2.642283000  | 3.355332000  | H | 2.569532000  | -3.165730000 | 1.095889000  |
| H | -5.230580000 | 0.681868000  | 4.724039000  | H | 4.620444000  | -4.136476000 | -0.093809000 |
| H | -3.698315000 | -0.119429000 | 4.389453000  | H | 5.505033000  | -4.891495000 | -2.282906000 |
| C | -4.276595000 | 2.237413000  | -2.331290000 | H | 4.552110000  | -3.980780000 | -4.391475000 |
| C | -5.723529000 | 1.955589000  | -2.740035000 | H | 2.698829000  | -2.322614000 | -4.289901000 |

|   |              |              |              |             |              |              |              |
|---|--------------|--------------|--------------|-------------|--------------|--------------|--------------|
| H | 1.799087000  | -1.607994000 | -2.090314000 | C           | 0.569227000  | -5.251121000 | -1.676740000 |
| C | 3.818126000  | 0.258245000  | 3.105226000  | H           | -4.659200000 | -1.301107000 | -2.441784000 |
| C | 2.864233000  | -0.766788000 | 2.417666000  | H           | -7.098367000 | -1.069797000 | -2.839469000 |
| C | 1.436369000  | -0.262418000 | 2.267873000  | H           | -8.716189000 | -2.254300000 | -1.371544000 |
| C | 1.178020000  | 1.140741000  | 2.054844000  | H           | -7.881775000 | -3.689335000 | 0.480766000  |
| C | 2.251334000  | 2.113808000  | 2.522679000  | H           | -5.431954000 | -3.921574000 | 0.864500000  |
| C | 3.093117000  | 1.493436000  | 3.639048000  | H           | -0.866691000 | -5.022214000 | 1.307599000  |
| H | 2.841504000  | -1.683797000 | 3.014327000  | H           | 0.448510000  | -4.050912000 | 0.654211000  |
| H | 4.575594000  | 0.605660000  | 2.391819000  | H           | -2.502736000 | -6.086364000 | -0.504850000 |
| H | 4.374567000  | -0.243867000 | 3.902285000  | H           | -2.505719000 | -7.412074000 | -2.600884000 |
| H | 1.745945000  | 3.030811000  | 2.836581000  | H           | -0.540885000 | -7.340809000 | -4.124211000 |
| H | 2.897884000  | 2.393015000  | 1.679302000  | H           | 1.434932000  | -5.941880000 | -3.517268000 |
| H | 2.439206000  | 1.220567000  | 4.476869000  | H           | 1.431620000  | -4.645425000 | -1.423929000 |
| H | 3.822700000  | 2.216572000  | 4.021912000  | H           | -1.163967000 | -2.522984000 | 1.389307000  |
| O | 0.110629000  | 1.594800000  | 1.595183000  | <b>INT5</b> |              |              |              |
| C | 0.367645000  | -1.085700000 | 2.421500000  | N           | 6.027544000  | 0.547535000  | -0.453413000 |
| C | -0.662304000 | -1.816310000 | 2.573452000  | N           | 3.750384000  | 1.081033000  | -0.481753000 |
| C | -1.507595000 | -2.079911000 | 3.741529000  | N           | 4.541597000  | -0.655590000 | -1.786016000 |
| C | -1.232693000 | -1.469912000 | 4.981140000  | C           | 4.767317000  | 0.329863000  | -0.892317000 |
| C | -2.633136000 | -2.916029000 | 3.644387000  | C           | 5.412098000  | -0.933943000 | -2.938157000 |
| C | -2.053314000 | -1.687510000 | 6.082931000  | H           | 6.079623000  | -0.087041000 | -3.113273000 |
| H | -0.366632000 | -0.818622000 | 5.060364000  | H           | 6.011223000  | -1.836102000 | -2.760083000 |
| C | -3.457108000 | -3.127395000 | 4.750455000  | C           | 4.389039000  | -1.163570000 | -4.053778000 |
| H | -2.871440000 | -3.387917000 | 2.696502000  | C           | 3.295679000  | -1.960662000 | -3.332313000 |
| C | -3.173542000 | -2.517269000 | 5.972269000  | H           | 3.607056000  | -3.002579000 | -3.215940000 |
| H | -1.823962000 | -1.205491000 | 7.029778000  | H           | 2.329084000  | -1.930080000 | -3.837197000 |
| H | -4.325582000 | -3.773726000 | 4.653881000  | C           | 3.213466000  | -1.296925000 | -1.939351000 |
| H | -3.818266000 | -2.682773000 | 6.830909000  | H           | 2.433451000  | -0.538388000 | -1.938443000 |
| H | 3.103687000  | 7.965134000  | 0.615026000  | H           | 4.814122000  | -1.696106000 | -4.909482000 |
| O | -0.333834000 | -1.649062000 | -1.115519000 | O           | 3.841882000  | -3.283987000 | -0.737741000 |
| O | -2.602462000 | -1.929203000 | -1.184940000 | C           | 3.033010000  | -2.362977000 | -0.850189000 |
| N | -2.902998000 | -3.555480000 | 0.348087000  | N           | 1.915864000  | -2.243960000 | -0.091784000 |
| C | -1.314099000 | -2.256748000 | -0.725209000 | C           | 1.453043000  | -3.257629000 | 0.812313000  |
| C | -1.509591000 | -3.252705000 | 0.325012000  | C           | 2.074186000  | -3.431022000 | 2.058576000  |
| C | -3.469159000 | -2.765860000 | -0.495151000 | C           | 1.538849000  | -4.383061000 | 2.936010000  |
| C | -4.894494000 | -2.632176000 | -0.766446000 | H           | 2.003518000  | -4.533426000 | 3.906137000  |
| C | -5.368190000 | -1.826177000 | -1.813295000 | C           | 0.416924000  | -5.124563000 | 2.588377000  |
| C | -6.739157000 | -1.694646000 | -2.026556000 | C           | -0.176672000 | -4.948316000 | 1.339235000  |
| C | -7.648327000 | -2.361666000 | -1.204212000 | H           | -1.045374000 | -5.540406000 | 1.075782000  |
| C | -7.178509000 | -3.168918000 | -0.163176000 | C           | 0.334129000  | -4.027061000 | 0.420728000  |
| C | -5.812923000 | -3.305505000 | 0.057165000  | H           | 1.384092000  | -1.378440000 | -0.103544000 |
| C | -0.552520000 | -4.432688000 | 0.438482000  | C           | 3.291717000  | -2.628806000 | 2.481841000  |
| C | -0.531726000 | -5.281298000 | -0.814512000 | C           | 4.511671000  | -3.551959000 | 2.633240000  |
| C | -1.638339000 | -6.068518000 | -1.162299000 | H           | 3.513977000  | -1.910116000 | 1.690626000  |
| C | -1.640495000 | -6.805633000 | -2.345397000 | H           | 4.339813000  | -4.313916000 | 3.402340000  |
| C | -0.536823000 | -6.766468000 | -3.201524000 | H           | 4.718488000  | -4.055541000 | 1.685130000  |
| C | 0.568552000  | -5.986521000 | -2.862753000 | H           | 5.396684000  | -2.976214000 | 2.927904000  |

|   |              |              |              |   |              |              |              |
|---|--------------|--------------|--------------|---|--------------|--------------|--------------|
| C | -0.260485000 | -3.882416000 | -0.973835000 | H | 9.808824000  | -2.716732000 | 1.480452000  |
| C | 0.643822000  | -4.561594000 | -2.022936000 | H | 8.752488000  | -1.647235000 | 2.399094000  |
| H | -0.300353000 | -2.815262000 | -1.210764000 | H | 3.023454000  | 1.275061000  | -1.225805000 |
| H | 0.604056000  | -5.651496000 | -1.906491000 | H | 6.147515000  | 1.390661000  | 0.091096000  |
| H | 0.297454000  | -4.309314000 | -3.031516000 | O | -2.378560000 | -1.456680000 | 0.013992000  |
| H | 1.690020000  | -4.264215000 | -1.927931000 | O | -4.447837000 | -2.216377000 | 0.521827000  |
| H | 3.994901000  | -0.198756000 | -4.390057000 | N | -5.326556000 | -0.487154000 | 1.703967000  |
| C | -1.686522000 | -4.429098000 | -1.102532000 | C | -3.455980000 | -1.253487000 | 0.505248000  |
| H | -2.361938000 | -3.977740000 | -0.372196000 | C | -4.025357000 | -0.028492000 | 1.214706000  |
| H | -2.069174000 | -4.199708000 | -2.101389000 | C | -5.502568000 | -1.668969000 | 1.256046000  |
| H | -1.712229000 | -5.519342000 | -0.985876000 | C | -6.681418000 | -2.516360000 | 1.410847000  |
| C | 3.024923000  | -1.828640000 | 3.766471000  | C | -6.737451000 | -3.787389000 | 0.823600000  |
| H | 3.905274000  | -1.233565000 | 4.035474000  | C | -7.880882000 | -4.568645000 | 0.976090000  |
| H | 2.181327000  | -1.145213000 | 3.630062000  | C | -8.965885000 | -4.087866000 | 1.710422000  |
| H | 2.797675000  | -2.486374000 | 4.613056000  | C | -8.910045000 | -2.819038000 | 2.295578000  |
| C | 3.739978000  | 1.933644000  | 0.709561000  | C | -7.773375000 | -2.032788000 | 2.147636000  |
| C | 2.548225000  | 2.894404000  | 0.617765000  | C | -4.245633000 | 1.122768000  | 0.181663000  |
| C | 3.659244000  | 1.079599000  | 1.982566000  | C | -4.945338000 | 0.686764000  | -1.084687000 |
| H | 4.654077000  | 2.551792000  | 0.742897000  | C | -6.304960000 | 0.341800000  | -1.096383000 |
| C | 2.489046000  | 3.783196000  | 1.864295000  | C | -6.906683000 | -0.123999000 | -2.264581000 |
| H | 1.627571000  | 2.301916000  | 0.540681000  | C | -6.160578000 | -0.244842000 | -3.439039000 |
| H | 2.620799000  | 3.494650000  | -0.294939000 | C | -4.815370000 | 0.123619000  | -3.444003000 |
| C | 3.562508000  | 1.953827000  | 3.238528000  | C | -4.213766000 | 0.592182000  | -2.275528000 |
| H | 2.767402000  | 0.450113000  | 1.896034000  | H | -5.891674000 | -4.150047000 | 0.250677000  |
| H | 4.525324000  | 0.408214000  | 2.042471000  | H | -7.924978000 | -5.552703000 | 0.519183000  |
| C | 2.387697000  | 2.935125000  | 3.137290000  | H | -9.856073000 | -4.699459000 | 1.826378000  |
| H | 1.640802000  | 4.467179000  | 1.792015000  | H | -9.755168000 | -2.444624000 | 2.865548000  |
| H | 3.394443000  | 4.407273000  | 1.914489000  | H | -7.709437000 | -1.044729000 | 2.590739000  |
| H | 3.459098000  | 1.313970000  | 4.122988000  | H | -3.271185000 | 1.541623000  | -0.076105000 |
| H | 4.498054000  | 2.518946000  | 3.367852000  | H | -4.817573000 | 1.892191000  | 0.711990000  |
| H | 2.344324000  | 3.579313000  | 4.023065000  | H | -6.889732000 | 0.436997000  | -0.187129000 |
| H | 1.447207000  | 2.368705000  | 3.109324000  | H | -7.959909000 | -0.391857000 | -2.257234000 |
| C | 7.077746000  | -0.472288000 | -0.285507000 | H | -6.629877000 | -0.613421000 | -4.347231000 |
| C | 8.305325000  | 0.208932000  | 0.328899000  | H | -4.224520000 | 0.043598000  | -4.351467000 |
| C | 6.611295000  | -1.656253000 | 0.570790000  | H | -3.178124000 | 0.915270000  | -2.291057000 |
| H | 7.361622000  | -0.845754000 | -1.275794000 | C | -3.085637000 | -0.526106000 | 3.584021000  |
| C | 9.446013000  | -0.795442000 | 0.537735000  | C | -3.134074000 | 0.459928000  | 2.403553000  |
| H | 8.018707000  | 0.639581000  | 1.300796000  | C | -1.718082000 | 0.825991000  | 1.952793000  |
| H | 8.631164000  | 1.038536000  | -0.311074000 | C | -0.627877000 | -0.197222000 | 1.972947000  |
| C | 7.752204000  | -2.660716000 | 0.773569000  | C | -0.782190000 | -1.367134000 | 2.930266000  |
| H | 6.281433000  | -1.266931000 | 1.544079000  | C | -2.215719000 | -1.755806000 | 3.308909000  |
| H | 5.752397000  | -2.148486000 | 0.106834000  | H | -3.627608000 | 1.374246000  | 2.747394000  |
| C | 8.991139000  | -1.992850000 | 1.382754000  | H | -4.105808000 | -0.820680000 | 3.847497000  |
| H | 10.298883000 | -0.291697000 | 1.007068000  | H | -2.674895000 | 0.014069000  | 4.447561000  |
| H | 9.792974000  | -1.152621000 | -0.442207000 | H | -0.248415000 | -1.046608000 | 3.839028000  |
| H | 7.404597000  | -3.484004000 | 1.406606000  | H | -0.224980000 | -2.214273000 | 2.530583000  |
| H | 8.016526000  | -3.105765000 | -0.196515000 | H | -2.189117000 | -2.395662000 | 4.198146000  |

|   |              |              |              |                |              |              |              |
|---|--------------|--------------|--------------|----------------|--------------|--------------|--------------|
| H | -2.650102000 | -2.373194000 | 2.517190000  | H              | -1.393127000 | 3.541114000  | 0.182383000  |
| O | 0.403634000  | -0.054312000 | 1.322673000  | <b>TS4-SSR</b> |              |              |              |
| C | -1.444842000 | 2.059087000  | 1.580187000  | N              | 5.770100000  | 1.768564000  | 0.107825000  |
| C | -1.283130000 | 3.312099000  | 1.240966000  | N              | 3.512511000  | 1.396216000  | 0.594075000  |
| C | -0.962944000 | 4.429264000  | 2.141448000  | N              | 4.352801000  | 0.868830000  | -1.498313000 |
| C | -0.794104000 | 4.246983000  | 3.523493000  | C              | 4.537180000  | 1.339426000  | -0.251045000 |
| C | -0.816341000 | 5.715780000  | 1.600910000  | C              | 4.958967000  | 1.475326000  | -2.694601000 |
| C | -0.464961000 | 5.322407000  | 4.341244000  | H              | 5.328672000  | 2.475130000  | -2.456782000 |
| H | -0.911843000 | 3.252844000  | 3.946022000  | H              | 5.790666000  | 0.858057000  | -3.057081000 |
| C | -0.488166000 | 6.791432000  | 2.424176000  | C              | 3.788733000  | 1.457853000  | -3.681213000 |
| H | -0.949248000 | 5.867114000  | 0.536246000  | C              | 3.139005000  | 0.100066000  | -3.389352000 |
| C | -0.306630000 | 6.599844000  | 3.794136000  | H              | 3.719342000  | -0.703214000 | -3.852424000 |
| H | -0.330349000 | 5.166747000  | 5.408234000  | H              | 2.104390000  | 0.033285000  | -3.730210000 |
| H | -0.373875000 | 7.779581000  | 1.987701000  | C              | 3.233047000  | -0.032991000 | -1.854674000 |
| H | -0.047150000 | 7.438170000  | 4.434513000  | H              | 2.314256000  | 0.320736000  | -1.395031000 |
| H | 0.005168000  | -5.848554000 | 3.286535000  | H              | 4.114704000  | 1.563629000  | -4.719852000 |
| O | 2.215722000  | 1.611633000  | -2.569916000 | O              | 4.564218000  | -2.039872000 | -1.914710000 |
| O | 0.837163000  | 3.467146000  | -2.397077000 | C              | 3.573253000  | -1.474148000 | -1.450743000 |
| N | -1.145827000 | 2.502453000  | -2.017769000 | N              | 2.678346000  | -2.038938000 | -0.609679000 |
| C | 1.050421000  | 2.077213000  | -2.388894000 | C              | 2.633404000  | -3.438509000 | -0.314801000 |
| C | -0.196787000 | 1.511946000  | -2.147127000 | C              | 3.572200000  | -4.018085000 | 0.551463000  |
| C | -0.505922000 | 3.638467000  | -2.169350000 | C              | 3.462410000  | -5.387949000 | 0.821924000  |
| C | -1.030621000 | 4.978076000  | -2.026988000 | H              | 4.183522000  | -5.859462000 | 1.483623000  |
| C | -0.183527000 | 6.102346000  | -2.053944000 | C              | 2.442123000  | -6.147957000 | 0.263854000  |
| C | -0.700084000 | 7.377966000  | -1.840114000 | C              | 1.509782000  | -5.551067000 | -0.583528000 |
| C | -2.063409000 | 7.561476000  | -1.595558000 | H              | 0.714756000  | -6.153590000 | -1.008154000 |
| C | -2.912334000 | 6.449164000  | -1.580625000 | C              | 1.588371000  | -4.191441000 | -0.895198000 |
| C | -2.408461000 | 5.172257000  | -1.797280000 | H              | 1.968455000  | -1.440694000 | -0.164488000 |
| C | -0.496286000 | 0.057317000  | -2.015070000 | C              | 4.682974000  | -3.208602000 | 1.196758000  |
| C | -0.704286000 | -0.701934000 | -3.313837000 | C              | 6.058487000  | -3.663313000 | 0.684174000  |
| C | -1.730115000 | -1.646215000 | -3.426841000 | H              | 4.548036000  | -2.165258000 | 0.902045000  |
| C | -1.895684000 | -2.386753000 | -4.599901000 | H              | 6.245625000  | -4.715231000 | 0.929768000  |
| C | -1.032347000 | -2.192987000 | -5.678279000 | H              | 6.108560000  | -3.543786000 | -0.401212000 |
| C | -0.009773000 | -1.245772000 | -5.577234000 | H              | 6.856524000  | -3.067559000 | 1.143198000  |
| C | 0.150256000  | -0.503133000 | -4.407278000 | C              | 0.606942000  | -3.535338000 | -1.859593000 |
| H | 0.877021000  | 5.958044000  | -2.229385000 | C              | 1.238725000  | -3.391189000 | -3.258503000 |
| H | -0.031541000 | 8.234904000  | -1.858865000 | H              | 0.397442000  | -2.525637000 | -1.489565000 |
| H | -2.461214000 | 8.557356000  | -1.423130000 | H              | 1.378784000  | -4.379528000 | -3.712624000 |
| H | -3.975478000 | 6.580349000  | -1.397184000 | H              | 0.585374000  | -2.800144000 | -3.909813000 |
| H | -3.060719000 | 4.304879000  | -1.786684000 | H              | 2.219008000  | -2.909485000 | -3.216708000 |
| H | -1.359597000 | -0.079338000 | -1.366678000 | H              | 3.096806000  | 2.269851000  | -3.434963000 |
| H | 0.334336000  | -0.417430000 | -1.479329000 | C              | -0.737752000 | -4.263849000 | -1.960048000 |
| H | -2.403094000 | -1.798534000 | -2.589691000 | H              | -1.201792000 | -4.397885000 | -0.977817000 |
| H | -2.704030000 | -3.110427000 | -4.669840000 | H              | -1.428418000 | -3.679184000 | -2.571725000 |
| H | -1.158272000 | -2.767594000 | -6.592015000 | H              | -0.628762000 | -5.248562000 | -2.429732000 |
| H | 0.662518000  | -1.081174000 | -6.415753000 | C              | 4.601808000  | -3.269791000 | 2.730812000  |
| H | 0.944143000  | 0.234017000  | -4.329113000 | H              | 5.370259000  | -2.631055000 | 3.182756000  |

|   |              |              |              |   |              |              |              |
|---|--------------|--------------|--------------|---|--------------|--------------|--------------|
| H | 3.623253000  | -2.929787000 | 3.087067000  | C | -8.943321000 | -4.357786000 | 2.172018000  |
| H | 4.758202000  | -4.288725000 | 3.102471000  | C | -8.604861000 | -3.199880000 | 2.879258000  |
| C | 3.560015000  | 1.530652000  | 2.052033000  | C | -7.456014000 | -2.491059000 | 2.547583000  |
| C | 2.348612000  | 2.348929000  | 2.511889000  | C | -4.162138000 | 0.656909000  | 0.217959000  |
| C | 3.598679000  | 0.148167000  | 2.718001000  | C | -5.157181000 | 0.482000000  | -0.903910000 |
| H | 4.464678000  | 2.084086000  | 2.342710000  | C | -6.524986000 | 0.298665000  | -0.657384000 |
| C | 2.333545000  | 2.475785000  | 4.038064000  | C | -7.411707000 | 0.076940000  | -1.710843000 |
| H | 1.439338000  | 1.843803000  | 2.168705000  | C | -6.944232000 | 0.040119000  | -3.026228000 |
| H | 2.362279000  | 3.332230000  | 2.028520000  | C | -5.587132000 | 0.239453000  | -3.282540000 |
| C | 3.542560000  | 0.262627000  | 4.246417000  | C | -4.701174000 | 0.462199000  | -2.228985000 |
| H | 2.742966000  | -0.423274000 | 2.340958000  | H | -6.338005000 | -4.436590000 | -0.017386000 |
| H | 4.504336000  | -0.381990000 | 2.400446000  | H | -8.391930000 | -5.702338000 | 0.579475000  |
| C | 2.334264000  | 1.092900000  | 4.701102000  | H | -9.842425000 | -4.909004000 | 2.432479000  |
| H | 1.459094000  | 3.051692000  | 4.351051000  | H | -9.239674000 | -2.851127000 | 3.688499000  |
| H | 3.220809000  | 3.036645000  | 4.370027000  | H | -7.175356000 | -1.589214000 | 3.081086000  |
| H | 3.514988000  | -0.740410000 | 4.688649000  | H | -3.242694000 | 1.076899000  | -0.187089000 |
| H | 4.464696000  | 0.739017000  | 4.612372000  | H | -4.536386000 | 1.349614000  | 0.979262000  |
| H | 2.329200000  | 1.192669000  | 5.793297000  | H | -6.891198000 | 0.326033000  | 0.364357000  |
| H | 1.408547000  | 0.568656000  | 4.426705000  | H | -8.468992000 | -0.066374000 | -1.503846000 |
| C | 7.043579000  | 1.169841000  | -0.335695000 | H | -7.636224000 | -0.135176000 | -3.845697000 |
| C | 8.176914000  | 1.837786000  | 0.450344000  | H | -5.209652000 | 0.222839000  | -4.301349000 |
| C | 7.068866000  | -0.354723000 | -0.162297000 | H | -3.652205000 | 0.642807000  | -2.432398000 |
| H | 7.187126000  | 1.404140000  | -1.396733000 | C | -2.414863000 | -1.683028000 | 2.891124000  |
| C | 9.541753000  | 1.266794000  | 0.044331000  | C | -2.659523000 | -0.456489000 | 1.991656000  |
| H | 8.013379000  | 1.657469000  | 1.524094000  | C | -1.334881000 | 0.032897000  | 1.399544000  |
| H | 8.149245000  | 2.923689000  | 0.294624000  | C | -0.187393000 | -0.824561000 | 1.250340000  |
| C | 8.433240000  | -0.921253000 | -0.575144000 | C | -0.212649000 | -2.244571000 | 1.791730000  |
| H | 6.872978000  | -0.585142000 | 0.894901000  | C | -1.585595000 | -2.776301000 | 2.212743000  |
| H | 6.275521000  | -0.821929000 | -0.751978000 | H | -3.048867000 | 0.341739000  | 2.633791000  |
| C | 9.579114000  | -0.259330000 | 0.199486000  | H | -3.376533000 | -2.074697000 | 3.235747000  |
| H | 10.330150000 | 1.737020000  | 0.643237000  | H | -1.877773000 | -1.339102000 | 3.786035000  |
| H | 9.743535000  | 1.531079000  | -1.003319000 | H | 0.463151000  | -2.229187000 | 2.660680000  |
| H | 8.437963000  | -2.005665000 | -0.424273000 | H | 0.266060000  | -2.906575000 | 1.063346000  |
| H | 8.578458000  | -0.758027000 | -1.652733000 | H | -1.456236000 | -3.622733000 | 2.897005000  |
| H | 10.546605000 | -0.648305000 | -0.139245000 | H | -2.110364000 | -3.173308000 | 1.339671000  |
| H | 9.491301000  | -0.516215000 | 1.265148000  | O | 0.886487000  | -0.393665000 | 0.764858000  |
| H | 2.584025000  | 1.499738000  | 0.159687000  | C | -1.189103000 | 1.362705000  | 1.151355000  |
| H | 5.810747000  | 2.272184000  | 0.982711000  | C | -1.290368000 | 2.601370000  | 1.588571000  |
| O | -2.740681000 | -1.985947000 | -0.843166000 | C | -1.213668000 | 2.991165000  | 3.006050000  |
| O | -4.657904000 | -2.681096000 | 0.125874000  | C | -1.154110000 | 2.057772000  | 4.055862000  |
| N | -5.030923000 | -1.092652000 | 1.702227000  | C | -1.195324000 | 4.358760000  | 3.327131000  |
| C | -3.605939000 | -1.794091000 | -0.032489000 | C | -1.086320000 | 2.480465000  | 5.379582000  |
| C | -3.832007000 | -0.666130000 | 0.973029000  | H | -1.142376000 | 0.998604000  | 3.824346000  |
| C | -5.438463000 | -2.174031000 | 1.162988000  | C | -1.119838000 | 4.780486000  | 4.652970000  |
| C | -6.635307000 | -2.940792000 | 1.502117000  | H | -1.240253000 | 5.088909000  | 2.523110000  |
| C | -6.974819000 | -4.100270000 | 0.792842000  | C | -1.067120000 | 3.843655000  | 5.686808000  |
| C | -8.128527000 | -4.804711000 | 1.130989000  | H | -1.040187000 | 1.742432000  | 6.175798000  |

|                |              |              |              |   |              |              |              |
|----------------|--------------|--------------|--------------|---|--------------|--------------|--------------|
| H              | -1.104327000 | 5.843158000  | 4.879024000  | C | -3.396373000 | 0.163430000  | -1.816805000 |
| H              | -1.011601000 | 4.171350000  | 6.720896000  | H | -2.437039000 | -0.197353000 | -1.452726000 |
| H              | 2.368041000  | -7.208466000 | 0.489261000  | H | -4.645603000 | -0.700040000 | -4.859037000 |
| O              | 1.558099000  | 2.439166000  | -0.989841000 | O | -4.943126000 | 1.928981000  | -1.293265000 |
| O              | -0.205575000 | 3.889053000  | -1.117125000 | C | -3.793662000 | 1.499543000  | -1.170717000 |
| N              | -1.917063000 | 2.492811000  | -1.518466000 | N | -2.777563000 | 2.137485000  | -0.553192000 |
| C              | 0.336043000  | 2.595171000  | -1.124196000 | C | -2.907616000 | 3.415811000  | 0.074457000  |
| C              | -0.779625000 | 1.722401000  | -1.304202000 | C | -2.915056000 | 3.472867000  | 1.483355000  |
| C              | -1.559870000 | 3.733193000  | -1.362404000 | C | -2.995837000 | 4.727378000  | 2.093408000  |
| C              | -2.407650000 | 4.909696000  | -1.385024000 | H | -3.004773000 | 4.796346000  | 3.176485000  |
| C              | -1.878777000 | 6.195703000  | -1.185947000 | C | -3.079569000 | 5.889863000  | 1.330632000  |
| C              | -2.720217000 | 7.305798000  | -1.196633000 | C | -3.069663000 | 5.811528000  | -0.057582000 |
| C              | -4.091926000 | 7.149964000  | -1.404020000 | H | -3.132145000 | 6.722732000  | -0.644857000 |
| C              | -4.620994000 | 5.870087000  | -1.602528000 | C | -2.967787000 | 4.578905000  | -0.713038000 |
| C              | -3.791067000 | 4.755725000  | -1.592679000 | H | -1.933105000 | 1.586720000  | -0.305259000 |
| C              | -0.683720000 | 0.318012000  | -1.801573000 | C | -2.920637000 | 2.196417000  | 2.311672000  |
| C              | -0.925999000 | 0.175000000  | -3.294064000 | C | -4.376689000 | 1.765920000  | 2.569978000  |
| C              | -1.729631000 | -0.858988000 | -3.788976000 | H | -2.440484000 | 1.413051000  | 1.723160000  |
| C              | -1.920184000 | -1.020008000 | -5.163489000 | H | -4.901044000 | 2.517997000  | 3.171535000  |
| C              | -1.309624000 | -0.148038000 | -6.064983000 | H | -4.919927000 | 1.654064000  | 1.627191000  |
| C              | -0.513468000 | 0.892367000  | -5.580853000 | H | -4.414179000 | 0.812321000  | 3.111101000  |
| C              | -0.328683000 | 1.052937000  | -4.208397000 | C | -2.936112000 | 4.527185000  | -2.232070000 |
| H              | -0.812071000 | 6.310863000  | -1.025136000 | C | -4.331304000 | 4.812626000  | -2.815346000 |
| H              | -2.302460000 | 8.297108000  | -1.042316000 | H | -2.655239000 | 3.510096000  | -2.522738000 |
| H              | -4.745327000 | 8.017866000  | -1.410568000 | H | -4.653870000 | 5.831488000  | -2.568607000 |
| H              | -5.687836000 | 5.741857000  | -1.763970000 | H | -4.317307000 | 4.720494000  | -3.908429000 |
| H              | -4.189604000 | 3.757424000  | -1.742519000 | H | -5.062352000 | 4.108154000  | -2.411226000 |
| H              | -1.370515000 | -0.336307000 | -1.260210000 | H | -3.575437000 | -1.785108000 | -3.946130000 |
| H              | 0.316260000  | -0.050119000 | -1.561693000 | C | -1.880140000 | 5.477741000  | -2.818517000 |
| H              | -2.217849000 | -1.528649000 | -3.089217000 | H | -0.883109000 | 5.259843000  | -2.421324000 |
| H              | -2.550686000 | -1.827390000 | -5.527066000 | H | -1.843829000 | 5.376695000  | -3.909646000 |
| H              | -1.457576000 | -0.271905000 | -7.134307000 | H | -2.109994000 | 6.525973000  | -2.598119000 |
| H              | -0.041460000 | 1.584502000  | -6.273489000 | C | -2.128338000 | 2.306768000  | 3.620985000  |
| H              | 0.277293000  | 1.875130000  | -3.836229000 | H | -2.057625000 | 1.324668000  | 4.101041000  |
| H              | -1.420416000 | 3.424163000  | 0.890800000  | H | -1.108757000 | 2.663529000  | 3.435537000  |
| <b>TS4-SSS</b> |              |              |              | H | -2.600541000 | 2.988892000  | 4.337360000  |
| N              | -5.823274000 | -2.024466000 | -0.103876000 | C | -3.639783000 | -2.195657000 | 1.758842000  |
| N              | -3.574254000 | -1.619838000 | 0.411276000  | C | -3.525402000 | -3.731156000 | 1.712795000  |
| N              | -4.466060000 | -0.825013000 | -1.570439000 | C | -2.519430000 | -1.600714000 | 2.616742000  |
| C              | -4.614449000 | -1.485659000 | -0.411412000 | H | -4.603801000 | -1.903652000 | 2.198543000  |
| C              | -5.250372000 | -1.074436000 | -2.784142000 | C | -3.536383000 | -4.334323000 | 3.123542000  |
| H              | -5.685001000 | -2.075670000 | -2.749200000 | H | -2.587218000 | -3.972591000 | 1.198532000  |
| H              | -6.049920000 | -0.329584000 | -2.876581000 | H | -4.332831000 | -4.162877000 | 1.104403000  |
| C              | -4.198604000 | -0.887094000 | -3.878731000 | C | -2.551380000 | -2.189398000 | 4.030976000  |
| C              | -3.373187000 | 0.301870000  | -3.362874000 | H | -1.560184000 | -1.812497000 | 2.133540000  |
| H              | -3.850936000 | 1.242433000  | -3.652516000 | H | -2.618510000 | -0.513966000 | 2.643102000  |
| H              | -2.349064000 | 0.301163000  | -3.737405000 | C | -2.438445000 | -3.717397000 | 3.998695000  |

|   |               |              |              |   |              |              |              |
|---|---------------|--------------|--------------|---|--------------|--------------|--------------|
| H | -3.417712000  | -5.422667000 | 3.061044000  | H | 9.461321000  | 2.128119000  | 4.038161000  |
| H | -4.516657000  | -4.152554000 | 3.589949000  | H | 7.253334000  | 1.252848000  | 3.273012000  |
| H | -1.743270000  | -1.759874000 | 4.627304000  | H | 3.383558000  | -1.309435000 | -0.146132000 |
| H | -3.495175000  | -1.905734000 | 4.522355000  | H | 4.188617000  | -1.557319000 | 1.415939000  |
| H | -2.485629000  | -4.126180000 | 5.015233000  | H | 6.807104000  | -1.510738000 | 1.389901000  |
| H | -1.455118000  | -3.990787000 | 3.594235000  | H | 8.799996000  | -2.239251000 | 0.106037000  |
| C | -7.123367000  | -1.341051000 | -0.274375000 | H | 8.614615000  | -2.684235000 | -2.332887000 |
| C | -8.214084000  | -2.257208000 | 0.289376000  | H | 6.421799000  | -2.402136000 | -3.474850000 |
| C | -7.145723000  | 0.039853000  | 0.393616000  | H | 4.429870000  | -1.666026000 | -2.173708000 |
| H | -7.311071000  | -1.214955000 | -1.345054000 | C | 2.799345000  | 2.432353000  | 1.550182000  |
| C | -9.598516000  | -1.608024000 | 0.159904000  | C | 2.903682000  | 0.898746000  | 1.410077000  |
| H | -8.001878000  | -2.445335000 | 1.353579000  | C | 1.574764000  | 0.310154000  | 0.919038000  |
| H | -8.188162000  | -3.227035000 | -0.222484000 | C | 0.473894000  | 1.137484000  | 0.483260000  |
| C | -8.531622000  | 0.684474000  | 0.263070000  | C | 0.668133000  | 2.621184000  | 0.239618000  |
| H | -6.890156000  | -0.083135000 | 1.456069000  | C | 2.114178000  | 3.101976000  | 0.355021000  |
| H | -6.388242000  | 0.684931000  | -0.060928000 | H | 3.058917000  | 0.493509000  | 2.417686000  |
| C | -9.633405000  | -0.224221000 | 0.822240000  | H | 3.798405000  | 2.847436000  | 1.720236000  |
| H | -10.356507000 | -2.266908000 | 0.598893000  | H | 2.218898000  | 2.654165000  | 2.456506000  |
| H | -9.849137000  | -1.507806000 | -0.905690000 | H | 0.025639000  | 3.142012000  | 0.963769000  |
| H | -8.533189000  | 1.654257000  | 0.772697000  | H | 0.253437000  | 2.852018000  | -0.749471000 |
| H | -8.732253000  | 0.892168000  | -0.797760000 | H | 2.133087000  | 4.191406000  | 0.474296000  |
| H | -10.618651000 | 0.235524000  | 0.680606000  | H | 2.644276000  | 2.875750000  | -0.572176000 |
| H | -9.492079000  | -0.339972000 | 1.906599000  | O | -0.681681000 | 0.659630000  | 0.378468000  |
| H | -2.632721000  | -1.697700000 | -0.021127000 | C | 1.299214000  | -1.000984000 | 1.159605000  |
| H | -5.798535000  | -2.662390000 | 0.680034000  | C | 1.121932000  | -1.950518000 | 2.059460000  |
| O | 3.951479000   | 1.249199000  | -1.655544000 | C | 0.928108000  | -1.671687000 | 3.496811000  |
| O | 5.776324000   | 1.800518000  | -0.433920000 | C | 0.647571000  | -0.385105000 | 3.989123000  |
| N | 5.352065000   | 0.821276000  | 1.567356000  | C | 1.011778000  | -2.731596000 | 4.413589000  |
| C | 4.540247000   | 1.179251000  | -0.616501000 | C | 0.466348000  | -0.169938000 | 5.351790000  |
| C | 4.227750000   | 0.458374000  | 0.696015000  | H | 0.548355000  | 0.437607000  | 3.290125000  |
| C | 6.160148000   | 1.520454000  | 0.869837000  | C | 0.830057000  | -2.515672000 | 5.778773000  |
| C | 7.454686000   | 2.055038000  | 1.292182000  | H | 1.223639000  | -3.732788000 | 4.046440000  |
| C | 8.259168000   | 2.781497000  | 0.404989000  | C | 0.557621000  | -1.232901000 | 6.255621000  |
| C | 9.492925000   | 3.269822000  | 0.830978000  | H | 0.243064000  | 0.831582000  | 5.709432000  |
| C | 9.926589000   | 3.036558000  | 2.136635000  | H | 0.899749000  | -3.351423000 | 6.469659000  |
| C | 9.123770000   | 2.310613000  | 3.022064000  | H | 0.413219000  | -1.062458000 | 7.318584000  |
| C | 7.892149000   | 1.819680000  | 2.604187000  | H | -3.150195000 | 6.857338000  | 1.820321000  |
| C | 4.267252000   | -1.070872000 | 0.438780000  | O | -1.194003000 | -2.538734000 | -0.534201000 |
| C | 5.489985000   | -1.537411000 | -0.311417000 | O | -0.312623000 | -0.853566000 | -1.819514000 |
| C | 6.726482000   | -1.706442000 | 0.324773000  | N | 1.861649000  | -1.389696000 | -1.830583000 |
| C | 7.846260000   | -2.114007000 | -0.399761000 | C | -0.189348000 | -1.992522000 | -1.013801000 |
| C | 7.742216000   | -2.363928000 | -1.769548000 | C | 1.210741000  | -2.269634000 | -0.982777000 |
| C | 6.512495000   | -2.204276000 | -2.410043000 | C | 0.961230000  | -0.543700000 | -2.245774000 |
| C | 5.393153000   | -1.790404000 | -1.687144000 | C | 1.100187000  | 0.596656000  | -3.134267000 |
| H | 7.914771000   | 2.953506000  | -0.608411000 | C | 0.089285000  | 1.570344000  | -3.210977000 |
| H | 10.116442000  | 3.831627000  | 0.141724000  | C | 0.216967000  | 2.649656000  | -4.082334000 |
| H | 10.889138000  | 3.418186000  | 2.465416000  | C | 1.354281000  | 2.775339000  | -4.881306000 |

|             |              |              |              |   |              |              |              |
|-------------|--------------|--------------|--------------|---|--------------|--------------|--------------|
| C           | 2.366210000  | 1.813922000  | -4.800438000 | C | 1.793184000  | -3.147173000 | -2.929122000 |
| C           | 2.242851000  | 0.731268000  | -3.938093000 | H | 2.091086000  | -1.218430000 | -0.938284000 |
| C           | 1.795769000  | -3.606320000 | -0.627522000 | C | 5.142692000  | -3.251345000 | -1.002604000 |
| C           | 1.976749000  | -4.478411000 | -1.855753000 | C | 6.457917000  | -3.142852000 | -1.789466000 |
| C           | 0.857384000  | -5.024631000 | -2.496753000 | H | 4.928285000  | -2.264747000 | -0.584530000 |
| C           | 1.005963000  | -5.794596000 | -3.648444000 | H | 6.727418000  | -4.103468000 | -2.244656000 |
| C           | 2.278138000  | -6.026643000 | -4.178090000 | H | 6.358843000  | -2.393006000 | -2.577008000 |
| C           | 3.396364000  | -5.481974000 | -3.547260000 | H | 7.278740000  | -2.849425000 | -1.122759000 |
| C           | 3.245461000  | -4.712351000 | -2.392121000 | C | 0.648720000  | -2.170053000 | -3.182716000 |
| H           | -0.780351000 | 1.487344000  | -2.570509000 | C | 1.005779000  | -1.197744000 | -4.323304000 |
| H           | -0.570978000 | 3.394090000  | -4.132125000 | H | 0.514194000  | -1.567280000 | -2.280228000 |
| H           | 1.454212000  | 3.618043000  | -5.559673000 | H | 1.086282000  | -1.736381000 | -5.274939000 |
| H           | 3.257569000  | 1.910100000  | -5.413835000 | H | 0.231054000  | -0.428840000 | -4.425780000 |
| H           | 3.025176000  | -0.014022000 | -3.863417000 | H | 1.963938000  | -0.700610000 | -4.143867000 |
| H           | 1.107518000  | -4.102249000 | 0.065477000  | H | 2.772578000  | 3.741991000  | -1.645870000 |
| H           | 2.756456000  | -3.489493000 | -0.115387000 | C | -0.695415000 | -2.855428000 | -3.457430000 |
| H           | -0.131791000 | -4.830976000 | -2.087960000 | H | -0.930018000 | -3.597020000 | -2.685783000 |
| H           | 0.129429000  | -6.215470000 | -4.134601000 | H | -1.499586000 | -2.115643000 | -3.457000000 |
| H           | 2.394624000  | -6.626678000 | -5.076598000 | H | -0.702353000 | -3.362893000 | -4.429475000 |
| H           | 4.389883000  | -5.653834000 | -3.953300000 | C | 5.274655000  | -4.237273000 | 0.171120000  |
| H           | 4.117687000  | -4.280077000 | -1.909612000 | H | 6.052910000  | -3.902321000 | 0.868205000  |
| H           | 1.117417000  | -2.999821000 | 1.782868000  | H | 4.333573000  | -4.325394000 | 0.724406000  |
| <b>INT6</b> |              |              |              | H | 5.552051000  | -5.239102000 | -0.175688000 |
| N           | 5.385907000  | 1.699663000  | 1.316773000  | C | 3.556896000  | -0.261892000 | 2.504603000  |
| N           | 3.381793000  | 0.484492000  | 1.253462000  | C | 2.513122000  | 0.207008000  | 3.525270000  |
| N           | 4.149308000  | 1.599328000  | -0.637089000 | C | 3.454801000  | -1.766182000 | 2.218802000  |
| C           | 4.284326000  | 1.246015000  | 0.647933000  | H | 4.560642000  | -0.061846000 | 2.897580000  |
| C           | 4.680331000  | 2.851802000  | -1.197557000 | C | 2.570581000  | -0.627705000 | 4.808966000  |
| H           | 4.848256000  | 3.572551000  | -0.394996000 | H | 1.523306000  | 0.118919000  | 3.065328000  |
| H           | 5.628776000  | 2.661139000  | -1.715389000 | H | 2.660812000  | 1.272524000  | 3.740128000  |
| C           | 3.589187000  | 3.257788000  | -2.189379000 | C | 3.494659000  | -2.589731000 | 3.510575000  |
| C           | 3.141932000  | 1.906163000  | -2.759009000 | H | 2.520237000  | -1.939828000 | 1.677080000  |
| H           | 3.860342000  | 1.553452000  | -3.504286000 | H | 4.268375000  | -2.054911000 | 1.546554000  |
| H           | 2.147956000  | 1.930586000  | -3.209251000 | C | 2.422173000  | -2.123330000 | 4.503209000  |
| C           | 3.185269000  | 0.952488000  | -1.549564000 | H | 1.784590000  | -0.295519000 | 5.493859000  |
| H           | 2.213882000  | 0.900036000  | -1.064488000 | H | 3.532261000  | -0.457927000 | 5.316920000  |
| H           | 3.960895000  | 3.942042000  | -2.957352000 | H | 3.366655000  | -3.652091000 | 3.270888000  |
| O           | 4.713666000  | -0.551404000 | -2.640625000 | H | 4.485810000  | -2.493522000 | 3.979067000  |
| C           | 3.683011000  | -0.439976000 | -1.974756000 | H | 2.478422000  | -2.708815000 | 5.428945000  |
| N           | 2.872513000  | -1.448124000 | -1.589208000 | H | 1.427990000  | -2.304884000 | 4.071739000  |
| C           | 2.905650000  | -2.760826000 | -2.147360000 | C | 6.756594000  | 1.566593000  | 0.771579000  |
| C           | 3.981396000  | -3.629667000 | -1.906739000 | C | 7.744082000  | 1.785348000  | 1.922308000  |
| C           | 3.948850000  | -4.895845000 | -2.504773000 | C | 6.997179000  | 0.214152000  | 0.082475000  |
| H           | 4.776235000  | -5.581164000 | -2.343079000 | H | 6.916064000  | 2.364997000  | 0.037410000  |
| C           | 2.871442000  | -5.293021000 | -3.287584000 | C | 9.194775000  | 1.672665000  | 1.436078000  |
| C           | 1.796603000  | -4.427404000 | -3.486765000 | H | 7.560614000  | 1.020866000  | 2.693263000  |
| H           | 0.954611000  | -4.751897000 | -4.088531000 | H | 7.564034000  | 2.763673000  | 2.385273000  |



|   |              |              |              |   |              |              |              |
|---|--------------|--------------|--------------|---|--------------|--------------|--------------|
| C | 8.447665000  | 0.107361000  | -0.405686000 | C | -0.030956000 | -2.750328000 | 0.441714000  |
| H | 6.787790000  | -0.587918000 | 0.805781000  | C | -1.377839000 | -3.435562000 | 0.659025000  |
| H | 6.310279000  | 0.080382000  | -0.758699000 | H | -2.680999000 | -0.866370000 | 2.560758000  |
| C | 9.446997000  | 0.330882000  | 0.735613000  | H | -3.021660000 | -3.307502000 | 2.086532000  |
| H | 9.878091000  | 1.801957000  | 2.283284000  | H | -1.448092000 | -2.857872000 | 2.724738000  |
| H | 9.403619000  | 2.493823000  | 0.735963000  | H | 0.693744000  | -3.122994000 | 1.182398000  |
| H | 8.603935000  | -0.870437000 | -0.873373000 | H | 0.393940000  | -3.010506000 | -0.533377000 |
| H | 8.618070000  | 0.856949000  | -1.191824000 | H | -1.233167000 | -4.507242000 | 0.842109000  |
| H | 10.475471000 | 0.290601000  | 0.357901000  | H | -1.985699000 | -3.361654000 | -0.249680000 |
| H | 9.347717000  | -0.483078000 | 1.468307000  | O | 1.059836000  | -0.637181000 | 0.263717000  |
| H | 2.446807000  | 0.337894000  | 0.834748000  | C | -1.034311000 | 0.899830000  | 1.264589000  |
| H | 5.331727000  | 1.584830000  | 2.319420000  | C | -1.129525000 | 1.546954000  | 2.451282000  |
| O | -2.921521000 | -1.146662000 | -1.619297000 | C | -1.208449000 | 1.029444000  | 3.818565000  |
| O | -4.572711000 | -2.509749000 | -0.908836000 | C | -0.890980000 | -0.290984000 | 4.191323000  |
| N | -4.775320000 | -1.965721000 | 1.283113000  | C | -1.583164000 | 1.921078000  | 4.842867000  |
| C | -3.615573000 | -1.524449000 | -0.713538000 | C | -0.963846000 | -0.699803000 | 5.519921000  |
| C | -3.716448000 | -1.101156000 | 0.750428000  | H | -0.562237000 | -0.984793000 | 3.429211000  |
| C | -5.203578000 | -2.683073000 | 0.320295000  | C | -1.660493000 | 1.512185000  | 6.171002000  |
| C | -6.286452000 | -3.664414000 | 0.357095000  | H | -1.820522000 | 2.949604000  | 4.581333000  |
| C | -6.670772000 | -4.360261000 | -0.796453000 | C | -1.354138000 | 0.194916000  | 6.518584000  |
| C | -7.712537000 | -5.283669000 | -0.733014000 | H | -0.709293000 | -1.725152000 | 5.775402000  |
| C | -8.371772000 | -5.515756000 | 0.474810000  | H | -1.959873000 | 2.222807000  | 6.936711000  |
| C | -7.988462000 | -4.820902000 | 1.626216000  | H | -1.416237000 | -0.129009000 | 7.553619000  |
| C | -6.950511000 | -3.897813000 | 1.570893000  | H | 2.861868000  | -6.281816000 | -3.738365000 |
| C | -4.216604000 | 0.368178000  | 0.843020000  | O | 1.410135000  | 2.751486000  | 0.340672000  |
| C | -5.369250000 | 0.689560000  | -0.076529000 | O | -0.385970000 | 4.121385000  | 0.287076000  |
| C | -6.681741000 | 0.296426000  | 0.217142000  | N | -2.108397000 | 2.685631000  | -0.059502000 |
| C | -7.722128000 | 0.575839000  | -0.669138000 | C | 0.216457000  | 2.872741000  | 0.242657000  |
| C | -7.466707000 | 1.257675000  | -1.860584000 | C | -0.902321000 | 1.849291000  | 0.022018000  |
| C | -6.164321000 | 1.661244000  | -2.158449000 | C | -1.753381000 | 3.898974000  | 0.082906000  |
| C | -5.124070000 | 1.377693000  | -1.273566000 | C | -2.611470000 | 5.080050000  | 0.050008000  |
| H | -6.154484000 | -4.170769000 | -1.730660000 | C | -2.080685000 | 6.366399000  | 0.212161000  |
| H | -8.009891000 | -5.821627000 | -1.628378000 | C | -2.925050000 | 7.474064000  | 0.168472000  |
| H | -9.183581000 | -6.236212000 | 0.520751000  | C | -4.294827000 | 7.303128000  | -0.036575000 |
| H | -8.501253000 | -5.000897000 | 2.566622000  | C | -4.823939000 | 6.018941000  | -0.199255000 |
| H | -6.636716000 | -3.347062000 | 2.451220000  | C | -3.989626000 | 4.908120000  | -0.157039000 |
| H | -3.392178000 | 1.038289000  | 0.618074000  | C | -0.707298000 | 1.127325000  | -1.335997000 |
| H | -4.493831000 | 0.519903000  | 1.891589000  | C | -1.014482000 | 1.971272000  | -2.550562000 |
| H | -6.882505000 | -0.234317000 | 1.142855000  | C | -2.065647000 | 1.597443000  | -3.398646000 |
| H | -8.734254000 | 0.261729000  | -0.427982000 | C | -2.377530000 | 2.353045000  | -4.529789000 |
| H | -8.278521000 | 1.474907000  | -2.549628000 | C | -1.643793000 | 3.499901000  | -4.833958000 |
| H | -5.952591000 | 2.196525000  | -3.080463000 | C | -0.589741000 | 3.879146000  | -4.001831000 |
| H | -4.112578000 | 1.696948000  | -1.500393000 | C | -0.277102000 | 3.118556000  | -2.875353000 |
| C | -2.094944000 | -2.783276000 | 1.839962000  | H | -1.014797000 | 6.488937000  | 0.368889000  |
| C | -2.389894000 | -1.293155000 | 1.593636000  | H | -2.512691000 | 8.470982000  | 0.293993000  |
| C | -1.151981000 | -0.563875000 | 1.080972000  | H | -4.950497000 | 8.168685000  | -0.070779000 |
| C | -0.057138000 | -1.236287000 | 0.581597000  | H | -5.889298000 | 5.883806000  | -0.360852000 |

|             |              |              |              |   |               |              |              |
|-------------|--------------|--------------|--------------|---|---------------|--------------|--------------|
| H           | -4.385793000 | 3.906583000  | -0.285682000 | H | -2.015242000  | -2.978677000 | 3.548817000  |
| H           | -1.360082000 | 0.257489000  | -1.326996000 | H | -3.478124000  | 2.322465000  | 2.724479000  |
| H           | 0.312934000  | 0.750551000  | -1.359468000 | C | 1.474237000   | -3.157789000 | 3.612173000  |
| H           | -2.639498000 | 0.707227000  | -3.162318000 | H | 2.276762000   | -3.033141000 | 2.879976000  |
| H           | -3.196945000 | 2.043242000  | -5.173111000 | H | 1.646932000   | -2.444992000 | 4.427142000  |
| H           | -1.887528000 | 4.091150000  | -5.712254000 | H | 1.556228000   | -4.162252000 | 4.043607000  |
| H           | -0.006812000 | 4.767645000  | -4.229849000 | C | -1.658367000  | -3.723040000 | -2.924942000 |
| H           | 0.549271000  | 3.429158000  | -2.243936000 | H | -2.285104000  | -3.225233000 | -3.673117000 |
| H           | -1.165221000 | 2.636108000  | 2.422363000  | H | -0.638601000  | -3.337540000 | -3.019366000 |
| <b>INT7</b> |              |              |              | H | -1.634307000  | -4.789896000 | -3.175357000 |
| N           | -5.788700000 | 0.322562000  | -0.884358000 | C | -3.806931000  | 0.913128000  | -2.664141000 |
| N           | -3.540149000 | 0.746554000  | -1.233395000 | C | -2.843849000  | 1.934218000  | -3.278026000 |
| N           | -4.242363000 | 0.365770000  | 0.955144000  | C | -3.721619000  | -0.439313000 | -3.384040000 |
| C           | -4.614048000 | 0.466906000  | -0.388386000 | H | -4.831622000  | 1.287256000  | -2.780889000 |
| C           | -5.021995000 | 0.966174000  | 2.036266000  | C | -3.087817000  | 2.081771000  | -4.785549000 |
| H           | -5.608441000 | 1.807507000  | 1.655055000  | H | -1.807956000  | 1.617624000  | -3.106986000 |
| H           | -5.716516000 | 0.245090000  | 2.492444000  | H | -2.956248000  | 2.901960000  | -2.772777000 |
| C           | -3.942398000 | 1.381646000  | 3.039520000  | C | -3.963693000  | -0.291709000 | -4.890052000 |
| C           | -2.934354000 | 0.236126000  | 2.914715000  | H | -2.724737000  | -0.865375000 | -3.209807000 |
| H           | -3.304143000 | -0.646768000 | 3.447252000  | H | -4.448855000  | -1.121477000 | -2.931615000 |
| H           | -1.941349000 | 0.478326000  | 3.288802000  | C | -2.996548000  | 0.728776000  | -5.505387000 |
| C           | -2.917967000 | -0.054764000 | 1.398034000  | H | -2.370333000  | 2.793269000  | -5.212997000 |
| H           | -2.122915000 | 0.524696000  | 0.919490000  | H | -4.088241000  | 2.507032000  | -4.949202000 |
| H           | -4.326862000 | 1.503916000  | 4.057047000  | H | -3.863060000  | -1.264166000 | -5.389006000 |
| O           | -3.556503000 | -2.386552000 | 1.360767000  | H | -4.997211000  | 0.042193000  | -5.060400000 |
| C           | -2.684854000 | -1.549087000 | 1.163156000  | H | -3.197903000  | 0.853711000  | -6.576928000 |
| N           | -1.413621000 | -1.875758000 | 0.777135000  | H | -1.967808000  | 0.345068000  | -5.421911000 |
| C           | -0.955523000 | -3.228626000 | 0.690262000  | C | -6.885638000  | -0.279903000 | -0.146239000 |
| C           | -1.312382000 | -4.009309000 | -0.424232000 | C | -8.178192000  | -0.070685000 | -0.948505000 |
| C           | -0.835071000 | -5.324709000 | -0.480818000 | C | -6.644188000  | -1.781813000 | 0.093820000  |
| H           | -1.102719000 | -5.951207000 | -1.326294000 | H | -7.042401000  | 0.189891000  | 0.838196000  |
| C           | -0.035405000 | -5.843421000 | 0.532055000  | C | -9.385775000  | -0.729784000 | -0.271456000 |
| C           | 0.297442000  | -5.055509000 | 1.633252000  | H | -8.027915000  | -0.498494000 | -1.949561000 |
| H           | 0.908207000  | -5.474709000 | 2.426553000  | H | -8.345896000  | 1.004266000  | -1.090382000 |
| C           | -0.162173000 | -3.740277000 | 1.736552000  | C | -7.848497000  | -2.447826000 | 0.771022000  |
| H           | -0.703745000 | -1.153508000 | 0.785599000  | H | -6.461921000  | -2.253049000 | -0.883072000 |
| C           | -2.228625000 | -3.483768000 | -1.518435000 | H | -5.737081000  | -1.922679000 | 0.687856000  |
| C           | -3.634524000 | -4.098337000 | -1.390280000 | C | -9.140503000  | -2.224964000 | -0.025967000 |
| H           | -2.334802000 | -2.404627000 | -1.378827000 | H | -10.288728000 | -0.584624000 | -0.878652000 |
| H           | -3.601855000 | -5.182057000 | -1.559217000 | H | -9.576721000  | -0.235550000 | 0.693303000  |
| H           | -4.043271000 | -3.906983000 | -0.396633000 | H | -7.659251000  | -3.520920000 | 0.902374000  |
| H           | -4.307699000 | -3.657786000 | -2.135074000 | H | -7.973345000  | -2.029367000 | 1.781385000  |
| C           | 0.097256000  | -2.911232000 | 2.985082000  | H | -9.997262000  | -2.673344000 | 0.494230000  |
| C           | -1.034596000 | -3.146342000 | 4.003733000  | H | -9.056181000  | -2.737725000 | -0.995593000 |
| H           | 0.062459000  | -1.858236000 | 2.700469000  | H | -2.881593000  | 1.415294000  | -0.848602000 |
| H           | -1.010850000 | -4.178030000 | 4.374700000  | O | 1.499635000   | -1.010949000 | 0.820644000  |
| H           | -0.927443000 | -2.471259000 | 4.861930000  | O | 2.649206000   | -2.786838000 | 0.054030000  |

|   |              |              |              |             |              |              |              |
|---|--------------|--------------|--------------|-------------|--------------|--------------|--------------|
| N | 4.287567000  | -1.839009000 | -1.199566000 | C           | 5.590165000  | 3.304554000  | -1.467535000 |
| C | 2.418696000  | -1.441753000 | 0.168488000  | C           | 4.854234000  | 2.922300000  | -4.129494000 |
| C | 3.522266000  | -0.732428000 | -0.622664000 | H           | 2.823270000  | 2.928306000  | -3.398951000 |
| C | 3.767634000  | -2.925030000 | -0.777675000 | C           | 6.569305000  | 3.224150000  | -2.456363000 |
| C | 4.180605000  | -4.296230000 | -1.049464000 | H           | 5.875893000  | 3.456170000  | -0.429681000 |
| C | 3.427443000  | -5.375319000 | -0.566358000 | C           | 6.204833000  | 3.027988000  | -3.789817000 |
| C | 3.837915000  | -6.676916000 | -0.844665000 | H           | 4.562348000  | 2.788480000  | -5.167328000 |
| C | 4.991855000  | -6.904844000 | -1.595856000 | H           | 7.617581000  | 3.316112000  | -2.186326000 |
| C | 5.741609000  | -5.826401000 | -2.077009000 | H           | 6.967822000  | 2.968198000  | -4.560481000 |
| C | 5.339226000  | -4.523491000 | -1.807964000 | H           | 0.319547000  | -6.869498000 | 0.471720000  |
| C | 4.443899000  | 0.054222000  | 0.359668000  | O           | -1.349090000 | 2.909557000  | 0.454758000  |
| C | 4.854614000  | -0.738002000 | 1.576967000  | O           | 0.322062000  | 4.783636000  | -1.254295000 |
| C | 5.805007000  | -1.765196000 | 1.491685000  | N           | 1.078265000  | 4.216257000  | 0.799082000  |
| C | 6.123907000  | -2.532050000 | 2.611641000  | C           | -0.335820000 | 2.428182000  | 0.014530000  |
| C | 5.507024000  | -2.277554000 | 3.837936000  | C           | 1.084449000  | 2.802465000  | 0.489174000  |
| C | 4.576223000  | -1.243803000 | 3.939403000  | C           | 0.645335000  | 5.133629000  | -0.123155000 |
| C | 4.253958000  | -0.483586000 | 2.815836000  | C           | 0.615524000  | 6.559603000  | 0.322605000  |
| H | 2.527993000  | -5.191622000 | 0.009820000  | C           | 0.641333000  | 7.544188000  | -0.672283000 |
| H | 3.252494000  | -7.513572000 | -0.475084000 | C           | 0.619575000  | 8.892014000  | -0.325893000 |
| H | 5.308475000  | -7.921793000 | -1.809316000 | C           | 0.557183000  | 9.267969000  | 1.017962000  |
| H | 6.638495000  | -6.005011000 | -2.662601000 | C           | 0.510702000  | 8.291277000  | 2.013901000  |
| H | 5.903252000  | -3.672339000 | -2.174700000 | C           | 0.540917000  | 6.941199000  | 1.668938000  |
| H | 3.921787000  | 0.963167000  | 0.660109000  | C           | 1.446074000  | 1.999859000  | 1.768562000  |
| H | 5.313710000  | 0.358253000  | -0.231375000 | C           | 0.543498000  | 1.969679000  | 2.988255000  |
| H | 6.288269000  | -1.965317000 | 0.540922000  | C           | 0.708625000  | 0.876896000  | 3.855284000  |
| H | 6.857463000  | -3.328801000 | 2.526382000  | C           | 0.021935000  | 0.806103000  | 5.065700000  |
| H | 5.754975000  | -2.877085000 | 4.709025000  | C           | -0.861256000 | 1.825051000  | 5.426815000  |
| H | 4.096317000  | -1.030366000 | 4.890235000  | C           | -1.056974000 | 2.899191000  | 4.559727000  |
| H | 3.529156000  | 0.319290000  | 2.901392000  | C           | -0.361573000 | 2.974943000  | 3.350706000  |
| C | 2.536751000  | -0.533719000 | -3.009682000 | H           | 0.675879000  | 7.226754000  | -1.708786000 |
| C | 2.999903000  | 0.228489000  | -1.758838000 | H           | 0.647275000  | 9.650623000  | -1.102575000 |
| C | 1.896690000  | 1.160965000  | -1.270675000 | H           | 0.535678000  | 10.319764000 | 1.288415000  |
| C | 0.627129000  | 0.740507000  | -1.421854000 | H           | 0.441640000  | 8.579869000  | 3.058592000  |
| C | 0.132465000  | -0.431839000 | -2.208967000 | H           | 0.465861000  | 6.194495000  | 2.455100000  |
| C | 1.251467000  | -1.324438000 | -2.761784000 | H           | 2.430637000  | 2.390768000  | 2.066796000  |
| H | 3.879678000  | 0.804990000  | -2.037401000 | H           | 1.617738000  | 0.971331000  | 1.454050000  |
| H | 3.335494000  | -1.197293000 | -3.349314000 | H           | 1.379176000  | 0.070640000  | 3.571969000  |
| H | 2.368423000  | 0.208926000  | -3.799578000 | H           | 0.165559000  | -0.052060000 | 5.716209000  |
| H | -0.466666000 | -0.021300000 | -3.032271000 | H           | -1.406356000 | 1.771526000  | 6.364555000  |
| H | -0.575055000 | -1.002012000 | -1.598644000 | H           | -1.763578000 | 3.683216000  | 4.816515000  |
| H | 0.915204000  | -1.794077000 | -3.691219000 | H           | -0.563193000 | 3.795090000  | 2.673251000  |
| H | 1.441268000  | -2.149606000 | -2.068585000 | H           | 3.273662000  | 4.110813000  | -0.087045000 |
| O | -0.455696000 | 1.427570000  | -0.896967000 | H           | 1.388871000  | 4.511913000  | 1.710622000  |
| C | 2.138052000  | 2.436913000  | -0.577306000 | <b>TS1'</b> |              |              |              |
| C | 3.197628000  | 3.251981000  | -0.749981000 | N           | -2.142360000 | -2.607162000 | -1.135449000 |
| C | 4.231777000  | 3.168703000  | -1.792653000 | N           | -0.615183000 | -1.539956000 | 0.315699000  |
| C | 3.875737000  | 2.996564000  | -3.141141000 | N           | -0.829163000 | -0.835649000 | -1.877669000 |

|   |              |              |              |   |              |              |              |
|---|--------------|--------------|--------------|---|--------------|--------------|--------------|
| C | -1.187312000 | -1.664282000 | -0.867583000 | H | -2.363342000 | -2.009947000 | 1.351923000  |
| C | -0.814112000 | -1.194655000 | -3.301197000 | C | -1.561268000 | -3.933780000 | 3.192866000  |
| H | -0.656193000 | -2.270451000 | -3.411894000 | H | 0.198223000  | -3.538442000 | 1.999496000  |
| H | -1.764890000 | -0.927108000 | -3.781393000 | H | -1.146607000 | -4.165020000 | 1.070630000  |
| C | 0.324146000  | -0.331608000 | -3.849156000 | C | -1.649901000 | -1.539827000 | 3.988998000  |
| C | 0.170606000  | 0.962769000  | -3.040916000 | H | 0.093384000  | -0.972281000 | 2.830775000  |
| H | -0.659699000 | 1.560655000  | -3.428183000 | H | -1.340393000 | -0.071373000 | 2.411697000  |
| H | 1.075131000  | 1.573499000  | -3.028522000 | C | -1.238766000 | -2.973673000 | 4.344543000  |
| C | -0.196143000 | 0.473121000  | -1.628913000 | H | -1.243910000 | -4.954166000 | 3.439056000  |
| H | 0.698971000  | 0.347102000  | -1.034934000 | H | -2.651459000 | -3.969841000 | 3.048503000  |
| H | 0.245073000  | -0.172087000 | -4.928191000 | H | -1.392447000 | -0.852206000 | 4.803155000  |
| O | -2.169090000 | 1.846971000  | -1.528896000 | H | -2.743071000 | -1.497887000 | 3.878614000  |
| C | -1.172307000 | 1.437959000  | -0.937173000 | H | -1.741913000 | -3.300127000 | 5.262707000  |
| N | -0.828790000 | 1.797954000  | 0.326256000  | H | -0.158662000 | -3.003264000 | 4.547678000  |
| C | -1.425788000 | 2.885777000  | 1.040472000  | C | -3.370724000 | -2.377668000 | -1.919005000 |
| C | -2.754423000 | 2.809728000  | 1.487074000  | C | -4.298488000 | -3.579302000 | -1.707033000 |
| C | -3.278085000 | 3.915063000  | 2.170376000  | C | -4.076538000 | -1.066355000 | -1.548368000 |
| H | -4.306845000 | 3.885114000  | 2.517508000  | H | -3.107789000 | -2.345930000 | -2.982941000 |
| C | -2.501963000 | 5.039180000  | 2.421838000  | C | -5.602664000 | -3.418932000 | -2.498740000 |
| C | -1.177074000 | 5.083378000  | 1.989913000  | H | -4.532547000 | -3.656750000 | -0.633922000 |
| H | -0.578425000 | 5.963039000  | 2.198952000  | H | -3.781278000 | -4.503562000 | -1.993942000 |
| C | -0.615274000 | 4.016060000  | 1.287211000  | C | -5.375966000 | -0.903208000 | -2.346185000 |
| H | 0.017689000  | 1.410077000  | 0.734975000  | H | -4.301860000 | -1.090481000 | -0.472412000 |
| C | -3.626324000 | 1.582524000  | 1.273820000  | H | -3.418477000 | -0.209717000 | -1.717923000 |
| C | -4.797477000 | 1.895389000  | 0.328350000  | C | -6.311300000 | -2.102787000 | -2.151152000 |
| H | -3.012437000 | 0.810613000  | 0.802702000  | H | -6.259655000 | -4.274872000 | -2.305290000 |
| H | -5.440535000 | 2.678337000  | 0.747405000  | H | -5.373956000 | -3.435714000 | -3.573808000 |
| H | -4.418982000 | 2.230522000  | -0.639345000 | H | -5.871973000 | 0.027587000  | -2.050910000 |
| H | -5.417198000 | 1.003470000  | 0.176960000  | H | -5.133192000 | -0.800196000 | -3.413884000 |
| C | 0.812066000  | 4.071650000  | 0.753813000  | H | -7.215118000 | -1.988853000 | -2.761443000 |
| C | 0.807689000  | 4.418027000  | -0.748080000 | H | -6.640789000 | -2.136529000 | -1.102515000 |
| H | 1.257693000  | 3.079581000  | 0.869451000  | H | -2.242745000 | -3.297586000 | -0.404333000 |
| H | 0.439530000  | 5.439040000  | -0.903886000 | O | 1.699224000  | 0.828050000  | 1.878835000  |
| H | 1.822591000  | 4.354787000  | -1.159297000 | O | 2.728463000  | 0.880261000  | -0.158113000 |
| H | 0.163448000  | 3.745619000  | -1.321233000 | N | 2.756437000  | -1.301818000 | -0.728260000 |
| H | 1.288633000  | -0.802196000 | -3.637115000 | C | 2.161504000  | 0.199420000  | 0.936950000  |
| C | 1.721723000  | 5.038618000  | 1.520879000  | C | 2.107380000  | -1.202919000 | 0.543948000  |
| H | 1.710268000  | 4.829526000  | 2.595616000  | C | 3.064321000  | -0.103264000 | -1.079504000 |
| H | 2.752639000  | 4.931540000  | 1.166709000  | C | 3.668809000  | 0.342462000  | -2.329342000 |
| H | 1.431957000  | 6.085443000  | 1.370699000  | C | 3.869420000  | 1.706497000  | -2.590071000 |
| C | -4.136794000 | 1.017942000  | 2.610835000  | C | 4.419853000  | 2.110299000  | -3.805111000 |
| H | -4.668756000 | 0.072683000  | 2.445836000  | C | 4.775037000  | 1.163125000  | -4.766643000 |
| H | -3.314393000 | 0.831279000  | 3.307825000  | C | 4.582420000  | -0.197260000 | -4.506095000 |
| H | -4.835660000 | 1.707602000  | 3.097513000  | C | 4.034143000  | -0.608408000 | -3.296283000 |
| C | -1.276086000 | -2.032863000 | 1.528052000  | C | 2.495159000  | -2.268073000 | 1.564018000  |
| C | -0.889250000 | -3.479317000 | 1.890518000  | C | 3.949350000  | -2.159618000 | 1.967053000  |
| C | -0.987957000 | -1.068903000 | 2.689000000  | C | 4.319646000  | -1.382369000 | 3.071096000  |

|                |              |              |              |   |              |              |              |
|----------------|--------------|--------------|--------------|---|--------------|--------------|--------------|
| C              | 5.662846000  | -1.226548000 | 3.413147000  | H | 1.685542000  | 0.608557000  | 1.417465000  |
| C              | 6.655490000  | -1.846532000 | 2.652768000  | H | 3.332811000  | 2.113657000  | 3.525033000  |
| C              | 6.295734000  | -2.617420000 | 1.545905000  | H | 2.411553000  | 2.854788000  | 2.195502000  |
| C              | 4.952062000  | -2.770466000 | 1.205587000  | H | 1.570344000  | 1.983762000  | 3.501468000  |
| H              | 3.589217000  | 2.437572000  | -1.839465000 | C | 4.709703000  | 0.649053000  | -2.605641000 |
| H              | 4.569789000  | 3.168147000  | -4.001163000 | C | 5.660953000  | 1.641758000  | -3.291714000 |
| H              | 5.201803000  | 1.481318000  | -5.713484000 | H | 3.691824000  | 0.933102000  | -2.880102000 |
| H              | 4.862621000  | -0.938124000 | -5.249665000 | H | 6.712960000  | 1.372794000  | -3.142867000 |
| H              | 3.878642000  | -1.659324000 | -3.075511000 | H | 5.477014000  | 1.650756000  | -4.372287000 |
| H              | 2.292097000  | -3.252790000 | 1.128508000  | H | 5.517763000  | 2.658665000  | -2.909452000 |
| H              | 1.862627000  | -2.161082000 | 2.449971000  | H | -1.076674000 | 2.333045000  | -4.140698000 |
| H              | 3.547748000  | -0.884634000 | 3.652602000  | C | 4.926692000  | -0.785182000 | -3.120443000 |
| H              | 5.933790000  | -0.620624000 | 4.273645000  | H | 4.185825000  | -1.466632000 | -2.694324000 |
| H              | 7.702218000  | -1.727603000 | 2.918964000  | H | 4.821734000  | -0.818549000 | -4.210993000 |
| H              | 7.063129000  | -3.099044000 | 0.945525000  | H | 5.930239000  | -1.144617000 | -2.860577000 |
| H              | 4.672054000  | -3.355605000 | 0.334021000  | C | 2.589026000  | -0.539908000 | 2.970696000  |
| H              | -2.925177000 | 5.883240000  | 2.959721000  | H | 1.658166000  | -0.591029000 | 3.547707000  |
| H              | 0.669509000  | -1.341519000 | 0.373745000  | H | 2.690726000  | -1.461485000 | 2.392419000  |
| <b>TS2-SS'</b> |              |              |              | H | 3.420795000  | -0.501979000 | 3.683190000  |
| N              | -2.041336000 | 3.936187000  | -0.019989000 | C | -1.970360000 | 1.654417000  | 1.717789000  |
| N              | -1.343173000 | 1.737953000  | 0.392064000  | C | -3.460562000 | 1.283305000  | 1.614084000  |
| N              | -0.583161000 | 2.866084000  | -1.489175000 | C | -1.216486000 | 0.655127000  | 2.601334000  |
| C              | -1.303237000 | 2.833642000  | -0.362693000 | H | -1.873172000 | 2.642194000  | 2.187292000  |
| C              | -0.816918000 | 3.819065000  | -2.585519000 | C | -4.105464000 | 1.195084000  | 3.003189000  |
| H              | -1.872518000 | 4.098859000  | -2.615973000 | H | -3.536462000 | 0.318389000  | 1.100183000  |
| H              | -0.214572000 | 4.724153000  | -2.438083000 | H | -3.994997000 | 2.009405000  | 0.984902000  |
| C              | -0.315601000 | 3.047846000  | -3.806519000 | C | -1.855978000 | 0.590962000  | 3.993218000  |
| C              | 0.904607000  | 2.312821000  | -3.244898000 | H | -1.235946000 | -0.338319000 | 2.141036000  |
| H              | 1.747059000  | 3.008184000  | -3.150603000 | H | -0.167818000 | 0.954320000  | 2.665910000  |
| H              | 1.226417000  | 1.443696000  | -3.817864000 | C | -3.341077000 | 0.219365000  | 3.906843000  |
| C              | 0.447731000  | 1.869780000  | -1.837441000 | H | -5.153725000 | 0.890057000  | 2.903613000  |
| H              | 0.014386000  | 0.868532000  | -1.877490000 | H | -4.111139000 | 2.193704000  | 3.465787000  |
| H              | -0.074207000 | 3.710669000  | -4.642098000 | H | -1.318142000 | -0.140627000 | 4.602725000  |
| O              | 1.823575000  | 2.908745000  | -0.151728000 | H | -1.748179000 | 1.566295000  | 4.491346000  |
| C              | 1.620665000  | 1.912059000  | -0.844419000 | H | -3.788743000 | 0.202001000  | 4.907940000  |
| N              | 2.396437000  | 0.807172000  | -0.885050000 | H | -3.428091000 | -0.797114000 | 3.502989000  |
| C              | 3.681332000  | 0.743935000  | -0.260767000 | C | -1.422145000 | 5.273192000  | 0.149120000  |
| C              | 3.787886000  | 0.720788000  | 1.141515000  | C | -2.501207000 | 6.241715000  | 0.639407000  |
| C              | 5.067791000  | 0.691970000  | 1.704510000  | C | -0.218733000 | 5.238154000  | 1.100843000  |
| H              | 5.169874000  | 0.679706000  | 2.785520000  | H | -1.083757000 | 5.618402000  | -0.832002000 |
| C              | 6.206241000  | 0.649430000  | 0.907424000  | C | -1.921227000 | 7.649063000  | 0.838818000  |
| C              | 6.078998000  | 0.631197000  | -0.478755000 | H | -2.897363000 | 5.874806000  | 1.599514000  |
| H              | 6.969076000  | 0.578566000  | -1.098337000 | H | -3.337815000 | 6.259433000  | -0.069414000 |
| C              | 4.821634000  | 0.690200000  | -1.088777000 | C | 0.360607000  | 6.645691000  | 1.290866000  |
| H              | 2.161205000  | 0.083025000  | -1.582633000 | H | -0.555565000 | 4.846364000  | 2.072801000  |
| C              | 2.571390000  | 0.693146000  | 2.051540000  | H | 0.539410000  | 4.549181000  | 0.714983000  |
| C              | 2.464810000  | 1.993984000  | 2.865461000  | C | -0.708420000 | 7.631816000  | 1.779525000  |

|   |              |              |              |                |              |              |              |
|---|--------------|--------------|--------------|----------------|--------------|--------------|--------------|
| H | -2.699742000 | 8.317563000  | 1.224194000  | H              | -2.064462000 | -4.210368000 | -3.597967000 |
| H | -1.617618000 | 8.052171000  | -0.137827000 | H              | 0.145348000  | -0.809373000 | -5.129263000 |
| H | 1.200547000  | 6.606903000  | 1.993259000  | H              | -1.098345000 | -0.596155000 | -3.894353000 |
| H | 0.772655000  | 6.998350000  | 0.334244000  | H              | -0.235013000 | -3.295104000 | -5.067894000 |
| H | -0.288310000 | 8.640638000  | 1.868568000  | H              | -1.764389000 | -2.476060000 | -5.409049000 |
| H | -1.037771000 | 7.337555000  | 2.786583000  | O              | 1.687174000  | -0.653039000 | -3.168646000 |
| H | -1.004623000 | 0.842405000  | 0.007490000  | C              | 1.669160000  | -2.835885000 | -1.411458000 |
| H | -2.712359000 | 3.740146000  | 0.711704000  | C              | 2.550128000  | -3.056635000 | -0.596470000 |
| O | -0.549219000 | -0.831701000 | -0.322379000 | C              | 3.465217000  | -3.320769000 | 0.456416000  |
| O | -2.746693000 | -1.109781000 | -0.860115000 | C              | 4.678243000  | -2.613448000 | 0.574094000  |
| N | -2.955304000 | -3.351985000 | -0.754522000 | C              | 3.148375000  | -4.281559000 | 1.442807000  |
| C | -1.488154000 | -1.596790000 | -0.501265000 | C              | 5.529026000  | -2.847777000 | 1.649118000  |
| C | -1.583197000 | -3.046278000 | -0.563263000 | H              | 4.931858000  | -1.867455000 | -0.168586000 |
| C | -3.564509000 | -2.232934000 | -0.953761000 | C              | 4.004654000  | -4.504258000 | 2.516417000  |
| C | -4.974585000 | -2.002934000 | -1.222101000 | H              | 2.222106000  | -4.840996000 | 1.356954000  |
| C | -5.486403000 | -0.702043000 | -1.352246000 | C              | 5.199019000  | -3.787858000 | 2.627816000  |
| C | -6.844575000 | -0.508864000 | -1.592825000 | H              | 6.450117000  | -2.277836000 | 1.725551000  |
| C | -7.701673000 | -1.604461000 | -1.709396000 | H              | 3.737696000  | -5.240735000 | 3.269819000  |
| C | -7.193143000 | -2.901368000 | -1.584355000 | H              | 5.865050000  | -3.961708000 | 3.468344000  |
| C | -5.839591000 | -3.103749000 | -1.342604000 | H              | 7.191761000  | 0.618960000  | 1.364775000  |
| C | -0.834501000 | -3.907726000 | 0.436238000  | <b>TS2-RR'</b> |              |              |              |
| C | -1.159283000 | -3.580494000 | 1.877442000  | N              | 1.634049000  | 0.239901000  | 3.481665000  |
| C | -2.442403000 | -3.792773000 | 2.401034000  | N              | 0.210785000  | -0.533522000 | 1.783092000  |
| C | -2.718456000 | -3.508865000 | 3.738033000  | N              | 2.073864000  | 0.721993000  | 1.241049000  |
| C | -1.715300000 | -3.007939000 | 4.572530000  | C              | 1.304849000  | 0.130531000  | 2.157630000  |
| C | -0.439415000 | -2.781480000 | 4.055784000  | C              | 3.071664000  | 1.761838000  | 1.523839000  |
| C | -0.166290000 | -3.060476000 | 2.715402000  | H              | 2.786116000  | 2.319554000  | 2.418352000  |
| H | -4.815305000 | 0.145422000  | -1.265365000 | H              | 4.054774000  | 1.302296000  | 1.688642000  |
| H | -7.234883000 | 0.500191000  | -1.691707000 | C              | 3.063733000  | 2.576703000  | 0.231349000  |
| H | -8.760141000 | -1.450538000 | -1.898487000 | C              | 2.916367000  | 1.494156000  | -0.846129000 |
| H | -7.856735000 | -3.756404000 | -1.676528000 | H              | 3.890029000  | 1.040002000  | -1.056540000 |
| H | -5.427901000 | -4.102382000 | -1.242708000 | H              | 2.485204000  | 1.851055000  | -1.781684000 |
| H | 0.236352000  | -3.794058000 | 0.271882000  | C              | 1.971435000  | 0.449691000  | -0.205550000 |
| H | -1.096625000 | -4.949595000 | 0.215923000  | H              | 0.955994000  | 0.627330000  | -0.559298000 |
| H | -3.219681000 | -4.184871000 | 1.751481000  | H              | 3.966914000  | 3.179573000  | 0.110419000  |
| H | -3.715336000 | -3.686636000 | 4.133182000  | O              | 3.137709000  | -1.612906000 | 0.287400000  |
| H | -1.929445000 | -2.795241000 | 5.616447000  | C              | 2.422207000  | -0.992501000 | -0.500736000 |
| H | 0.349482000  | -2.392348000 | 4.693766000  | N              | 1.994352000  | -1.446990000 | -1.696584000 |
| H | 0.826967000  | -2.882362000 | 2.316726000  | C              | 2.427137000  | -2.673225000 | -2.289174000 |
| C | -1.606721000 | -3.238529000 | -3.387451000 | C              | 1.966920000  | -3.901400000 | -1.788221000 |
| C | -0.587057000 | -3.389976000 | -2.263312000 | C              | 2.398771000  | -5.074696000 | -2.418672000 |
| C | 0.614493000  | -2.590661000 | -2.320081000 | H              | 2.062118000  | -6.036092000 | -2.040911000 |
| C | 0.734340000  | -1.475689000 | -3.199134000 | C              | 3.239424000  | -5.027234000 | -3.524405000 |
| C | -0.332452000 | -1.294513000 | -4.271582000 | C              | 3.672078000  | -3.797339000 | -4.017690000 |
| C | -0.990854000 | -2.621850000 | -4.644941000 | H              | 4.327108000  | -3.770479000 | -4.882081000 |
| H | -0.417164000 | -4.421569000 | -1.960885000 | C              | 3.281922000  | -2.602342000 | -3.409356000 |
| H | -2.433334000 | -2.588272000 | -3.077043000 | H              | 1.487319000  | -0.783103000 | -2.311322000 |

|   |              |              |              |   |              |              |              |
|---|--------------|--------------|--------------|---|--------------|--------------|--------------|
| C | 1.024400000  | -3.983251000 | -0.600052000 | H | 3.227285000  | -1.795153000 | 2.549003000  |
| C | 1.733606000  | -4.611361000 | 0.611408000  | C | 4.618881000  | -1.905947000 | 5.748235000  |
| H | 0.744380000  | -2.962386000 | -0.330315000 | H | 4.304208000  | -0.305027000 | 7.191101000  |
| H | 2.037062000  | -5.643468000 | 0.399056000  | H | 5.120185000  | 0.197803000  | 5.715278000  |
| H | 2.623340000  | -4.028995000 | 0.863200000  | H | 4.744893000  | -3.185480000 | 3.991072000  |
| H | 1.070097000  | -4.635589000 | 1.485372000  | H | 5.385838000  | -1.566544000 | 3.753052000  |
| C | 3.817415000  | -1.256037000 | -3.877029000 | H | 5.597791000  | -2.194822000 | 6.148885000  |
| C | 5.046793000  | -0.875411000 | -3.028159000 | H | 3.875745000  | -2.555775000 | 6.232937000  |
| H | 3.040945000  | -0.505532000 | -3.706832000 | O | -1.183353000 | 0.225435000  | -0.473065000 |
| H | 5.878033000  | -1.560945000 | -3.233385000 | O | -3.310540000 | -0.580500000 | -0.401392000 |
| H | 5.379678000  | 0.143558000  | -3.260514000 | N | -4.510166000 | 1.275494000  | -0.845355000 |
| H | 4.828661000  | -0.937244000 | -1.957642000 | C | -2.382513000 | 0.447314000  | -0.554092000 |
| H | 2.206598000  | 3.254943000  | 0.218722000  | C | -3.136781000 | 1.623838000  | -0.960192000 |
| C | 4.155908000  | -1.207885000 | -5.371833000 | C | -4.555627000 | 0.017331000  | -0.565508000 |
| H | 3.302932000  | -1.520818000 | -5.983358000 | C | -5.722580000 | -0.829116000 | -0.370964000 |
| H | 4.421056000  | -0.184357000 | -5.658659000 | C | -5.586624000 | -2.193133000 | -0.067011000 |
| H | 5.010116000  | -1.847564000 | -5.623547000 | C | -6.719985000 | -2.978259000 | 0.131263000  |
| C | -0.270040000 | -4.732131000 | -0.957096000 | C | -7.992862000 | -2.415880000 | 0.023285000  |
| H | -0.961352000 | -4.735498000 | -0.105933000 | C | -8.130410000 | -1.058967000 | -0.286661000 |
| H | -0.775576000 | -4.256864000 | -1.804863000 | C | -7.005208000 | -0.267124000 | -0.483363000 |
| H | -0.073168000 | -5.776166000 | -1.225600000 | C | -2.771542000 | 3.012540000  | -0.442700000 |
| C | -0.699916000 | -1.282208000 | 2.657682000  | C | -2.283719000 | 3.023395000  | 0.988211000  |
| C | -1.779525000 | -0.354601000 | 3.237636000  | C | -3.178564000 | 3.028809000  | 2.065392000  |
| C | -1.316118000 | -2.433876000 | 1.852938000  | C | -2.711463000 | 3.079961000  | 3.379388000  |
| H | -0.105058000 | -1.718043000 | 3.471075000  | C | -1.338686000 | 3.119422000  | 3.633532000  |
| C | -2.828971000 | -1.127834000 | 4.042669000  | C | -0.438492000 | 3.087749000  | 2.566969000  |
| H | -2.263523000 | 0.170674000  | 2.406198000  | C | -0.907382000 | 3.035075000  | 1.254344000  |
| H | -1.319170000 | 0.428091000  | 3.849810000  | H | -4.596057000 | -2.628452000 | 0.004766000  |
| C | -2.373502000 | -3.190933000 | 2.665799000  | H | -6.608151000 | -4.032764000 | 0.366584000  |
| H | -1.775896000 | -2.024814000 | 0.946909000  | H | -8.874781000 | -3.031129000 | 0.176602000  |
| H | -0.517319000 | -3.106790000 | 1.533966000  | H | -9.119776000 | -0.619208000 | -0.374393000 |
| C | -3.456314000 | -2.246817000 | 3.203059000  | H | -7.092532000 | 0.787175000  | -0.723301000 |
| H | -3.597721000 | -0.432173000 | 4.398670000  | H | -2.005654000 | 3.460978000  | -1.073361000 |
| H | -2.360367000 | -1.564397000 | 4.937727000  | H | -3.678841000 | 3.617397000  | -0.539360000 |
| H | -2.819653000 | -3.972717000 | 2.039189000  | H | -4.246999000 | 3.007383000  | 1.865675000  |
| H | -1.890128000 | -3.706256000 | 3.509028000  | H | -3.418910000 | 3.099597000  | 4.204214000  |
| H | -4.188216000 | -2.806228000 | 3.797819000  | H | -0.973592000 | 3.175098000  | 4.655805000  |
| H | -4.003802000 | -1.803871000 | 2.360762000  | H | 0.630075000  | 3.117621000  | 2.758535000  |
| C | 2.947590000  | -0.212628000 | 3.996158000  | H | -0.213112000 | 3.015707000  | 0.420012000  |
| C | 2.978440000  | 0.017086000  | 5.508619000  | C | -3.375569000 | 0.597079000  | -3.582985000 |
| C | 3.232180000  | -1.677576000 | 3.637392000  | C | -2.609580000 | 1.701908000  | -2.850974000 |
| H | 3.721235000  | 0.413799000  | 3.543499000  | C | -1.166787000 | 1.709566000  | -2.960714000 |
| C | 4.316411000  | -0.443638000 | 6.103799000  | C | -0.431752000 | 0.523557000  | -3.269911000 |
| H | 2.160089000  | -0.556988000 | 5.971443000  | C | -1.227630000 | -0.698951000 | -3.698668000 |
| H | 2.794062000  | 1.075339000  | 5.728927000  | C | -2.478702000 | -0.272992000 | -4.470419000 |
| C | 4.572026000  | -2.130440000 | 4.231176000  | H | -3.063447000 | 2.684837000  | -2.964540000 |
| H | 2.420622000  | -2.300031000 | 4.044802000  | H | -3.888517000 | -0.058689000 | -2.871369000 |

|                |              |              |              |   |              |              |              |
|----------------|--------------|--------------|--------------|---|--------------|--------------|--------------|
| H              | -4.175844000 | 1.053930000  | -4.175763000 | C | -4.370841000 | -2.545814000 | -0.839305000 |
| H              | -0.567186000 | -1.333983000 | -4.298038000 | H | -1.753112000 | -1.456776000 | 0.497377000  |
| H              | -1.509968000 | -1.276010000 | -2.805763000 | C | -1.156004000 | -1.111747000 | -2.408235000 |
| H              | -2.171284000 | 0.292583000  | -5.358756000 | C | -1.483902000 | 0.163518000  | -3.208435000 |
| H              | -3.040841000 | -1.147003000 | -4.820918000 | H | -0.798300000 | -0.802232000 | -1.423574000 |
| O              | 0.825263000  | 0.466770000  | -3.236001000 | H | -1.856793000 | -0.089148000 | -4.208218000 |
| C              | -0.396473000 | 2.835082000  | -2.597314000 | H | -2.259026000 | 0.745174000  | -2.697812000 |
| C              | 0.336159000  | 3.754188000  | -2.265146000 | H | -0.593033000 | 0.791026000  | -3.329658000 |
| C              | 1.209204000  | 4.767916000  | -1.794018000 | C | -5.143655000 | -2.460635000 | 0.466646000  |
| C              | 2.526828000  | 4.866101000  | -2.291469000 | C | -6.281993000 | -1.430040000 | 0.348775000  |
| C              | 0.808038000  | 5.661962000  | -0.777596000 | H | -4.447309000 | -2.098605000 | 1.229712000  |
| C              | 3.410852000  | 5.808141000  | -1.775201000 | H | -7.017717000 | -1.752951000 | -0.397883000 |
| H              | 2.838817000  | 4.187158000  | -3.078681000 | H | -6.802845000 | -1.317269000 | 1.307868000  |
| C              | 1.699197000  | 6.603014000  | -0.270501000 | H | -5.889538000 | -0.456268000 | 0.042581000  |
| H              | -0.200642000 | 5.593245000  | -0.382688000 | H | -2.296516000 | 1.758489000  | 4.279727000  |
| C              | 3.005240000  | 6.679966000  | -0.760913000 | C | -5.669551000 | -3.824098000 | 0.938578000  |
| H              | 4.422317000  | 5.865793000  | -2.168968000 | H | -4.862373000 | -4.562338000 | 1.001997000  |
| H              | 1.373225000  | 7.278436000  | 0.516137000  | H | -6.124917000 | -3.729108000 | 1.930988000  |
| H              | 3.697956000  | 7.414874000  | -0.360905000 | H | -6.437456000 | -4.222256000 | 0.265853000  |
| H              | -0.194107000 | -0.307986000 | 0.868900000  | C | -0.025820000 | -1.921076000 | -3.058249000 |
| H              | 0.873038000  | -0.030185000 | 4.092340000  | H | 0.886779000  | -1.317746000 | -3.103136000 |
| H              | 3.558361000  | -5.947841000 | -4.005899000 | H | 0.192933000  | -2.825262000 | -2.482730000 |
| <b>TS2-SR'</b> |              |              |              | H | -0.271943000 | -2.220751000 | -4.083602000 |
| N              | -1.920884000 | 4.031213000  | 0.338147000  | C | 0.612298000  | 2.932744000  | -0.506288000 |
| N              | -0.212119000 | 2.438146000  | 0.599769000  | C | 1.591280000  | 4.021962000  | -0.045361000 |
| N              | -2.263872000 | 2.153443000  | 1.641407000  | C | 1.363215000  | 1.786854000  | -1.189573000 |
| C              | -1.445028000 | 2.868787000  | 0.850731000  | H | -0.079452000 | 3.357036000  | -1.245616000 |
| C              | -3.211163000 | 2.735318000  | 2.595857000  | C | 2.409191000  | 4.562066000  | -1.227601000 |
| H              | -2.854597000 | 3.715029000  | 2.920451000  | H | 2.253655000  | 3.582486000  | 0.707974000  |
| H              | -4.209495000 | 2.849947000  | 2.153039000  | H | 1.047592000  | 4.838706000  | 0.450557000  |
| C              | -3.215735000 | 1.667972000  | 3.692675000  | C | 2.106719000  | 2.340069000  | -2.413812000 |
| C              | -3.198732000 | 0.364800000  | 2.879781000  | H | 2.068493000  | 1.337887000  | -0.481892000 |
| H              | -4.211429000 | 0.125205000  | 2.537737000  | H | 0.655386000  | 1.003901000  | -1.473469000 |
| H              | -2.818678000 | -0.493219000 | 3.437462000  | C | 3.098972000  | 3.438242000  | -2.012601000 |
| C              | -2.293334000 | 0.688279000  | 1.660136000  | H | 3.155288000  | 5.276585000  | -0.862227000 |
| H              | -1.294022000 | 0.280187000  | 1.789967000  | H | 1.738735000  | 5.118237000  | -1.900758000 |
| H              | -4.080406000 | 1.747019000  | 4.357738000  | H | 2.633737000  | 1.534132000  | -2.933363000 |
| O              | -3.768192000 | 0.847455000  | -0.254474000 | H | 1.372913000  | 2.742711000  | -3.129176000 |
| C              | -2.952901000 | 0.168777000  | 0.372279000  | H | 3.587589000  | 3.853469000  | -2.902567000 |
| N              | -2.620040000 | -1.111065000 | 0.084477000  | H | 3.887306000  | 2.996522000  | -1.396452000 |
| C              | -3.159624000 | -1.852602000 | -1.015019000 | C | -3.247109000 | 4.103247000  | -0.309564000 |
| C              | -2.431866000 | -1.916090000 | -2.215610000 | C | -3.976396000 | 5.394867000  | 0.061990000  |
| C              | -2.948852000 | -2.693386000 | -3.256663000 | C | -3.106534000 | 3.948762000  | -1.829837000 |
| H              | -2.404974000 | -2.759554000 | -4.193722000 | H | -3.807272000 | 3.237532000  | 0.048064000  |
| C              | -4.150588000 | -3.379697000 | -3.109329000 | C | -5.352313000 | 5.451214000  | -0.617804000 |
| C              | -4.857156000 | -3.301158000 | -1.911630000 | H | -3.371559000 | 6.256725000  | -0.258095000 |
| H              | -5.793862000 | -3.839728000 | -1.806260000 | H | -4.075348000 | 5.464087000  | 1.151592000  |



|   |              |              |              |                |              |              |              |
|---|--------------|--------------|--------------|----------------|--------------|--------------|--------------|
| C | -4.483235000 | 3.998510000  | -2.504389000 | C              | 0.151011000  | -0.468598000 | 4.471938000  |
| H | -2.469404000 | 4.757495000  | -2.221231000 | C              | 0.245818000  | -1.990558000 | 4.373707000  |
| H | -2.607319000 | 2.998665000  | -2.048381000 | H              | 3.443661000  | -2.023766000 | 2.960009000  |
| C | -5.236913000 | 5.284479000  | -2.139406000 | H              | 2.244581000  | -2.123835000 | 5.173478000  |
| H | -5.852276000 | 6.395211000  | -0.371266000 | H              | 1.805881000  | -3.507358000 | 4.190659000  |
| H | -5.982131000 | 4.645889000  | -0.213775000 | H              | -0.887399000 | -0.127334000 | 4.446534000  |
| H | -4.369237000 | 3.914909000  | -3.591416000 | H              | 0.564220000  | -0.133223000 | 5.435716000  |
| H | -5.061370000 | 3.123398000  | -2.178737000 | H              | -0.305410000 | -2.316262000 | 3.484709000  |
| H | -6.234389000 | 5.282289000  | -2.594686000 | H              | -0.224174000 | -2.464408000 | 5.244278000  |
| H | -4.701695000 | 6.149626000  | -2.557524000 | O              | 0.503642000  | 1.397520000  | 3.028518000  |
| H | 0.241821000  | 1.892368000  | 1.363545000  | C              | 3.023984000  | 0.448501000  | 2.141758000  |
| H | -1.219662000 | 4.650028000  | -0.050712000 | C              | 3.857446000  | 1.130370000  | 1.566385000  |
| O | -0.006591000 | -1.379276000 | 0.953377000  | C              | 4.824783000  | 1.938443000  | 0.913837000  |
| O | 1.908695000  | -1.369981000 | -0.268645000 | C              | 4.918339000  | 3.319325000  | 1.193383000  |
| N | 3.088638000  | -3.018108000 | 0.720773000  | C              | 5.704179000  | 1.388649000  | -0.042784000 |
| C | 1.087569000  | -1.874811000 | 0.725210000  | C              | 5.831050000  | 4.121105000  | 0.514173000  |
| C | 1.862476000  | -2.882608000 | 1.428923000  | H              | 4.266116000  | 3.745981000  | 1.948837000  |
| C | 3.082673000  | -2.113878000 | -0.195930000 | C              | 6.616823000  | 2.197329000  | -0.711965000 |
| C | 4.141325000  | -1.766751000 | -1.128685000 | H              | 5.651122000  | 0.329340000  | -0.258942000 |
| C | 3.904807000  | -0.873816000 | -2.182978000 | C              | 6.681593000  | 3.567841000  | -0.446627000 |
| C | 4.938458000  | -0.518870000 | -3.044639000 | H              | 5.882978000  | 5.183141000  | 0.739767000  |
| C | 6.215893000  | -1.052438000 | -2.864736000 | H              | 7.273681000  | 1.751157000  | -1.453722000 |
| C | 6.453131000  | -1.952198000 | -1.819939000 | H              | 7.390347000  | 4.196909000  | -0.977624000 |
| C | 5.424473000  | -2.310731000 | -0.954954000 | H              | -4.538766000 | -3.977549000 | -3.929602000 |
| C | 1.161624000  | -4.184994000 | 1.789686000  | <b>TS2-RS'</b> |              |              |              |
| C | 0.450008000  | -4.733087000 | 0.566462000  | N              | -4.159658000 | -2.599358000 | -0.394014000 |
| C | 1.172067000  | -5.316369000 | -0.483149000 | N              | -2.874914000 | -1.753071000 | 1.394062000  |
| C | 0.525028000  | -5.717722000 | -1.651910000 | N              | -1.874523000 | -2.292733000 | -0.618344000 |
| C | -0.853080000 | -5.537980000 | -1.790977000 | C              | -2.972939000 | -2.193796000 | 0.144388000  |
| C | -1.582301000 | -4.960190000 | -0.751702000 | C              | -1.655318000 | -3.308325000 | -1.655615000 |
| C | -0.932514000 | -4.562552000 | 0.416980000  | H              | -2.240959000 | -4.201408000 | -1.427871000 |
| H | 2.913380000  | -0.459134000 | -2.307324000 | H              | -1.945736000 | -2.922790000 | -2.638844000 |
| H | 4.748699000  | 0.182324000  | -3.852229000 | C              | -0.138978000 | -3.495056000 | -1.567160000 |
| H | 7.023958000  | -0.769896000 | -3.533470000 | C              | 0.391087000  | -2.070176000 | -1.318149000 |
| H | 7.446449000  | -2.367417000 | -1.675734000 | H              | 0.627259000  | -1.580924000 | -2.267262000 |
| H | 5.593527000  | -2.994970000 | -0.130473000 | H              | 1.280663000  | -2.066899000 | -0.689512000 |
| H | 0.430960000  | -4.030902000 | 2.585211000  | C              | -0.772050000 | -1.316549000 | -0.612154000 |
| H | 1.916270000  | -4.887772000 | 2.157733000  | H              | -0.496905000 | -1.043386000 | 0.405877000  |
| H | 2.247418000  | -5.433051000 | -0.384875000 | H              | 0.280223000  | -3.949294000 | -2.468937000 |
| H | 1.099765000  | -6.165707000 | -2.458314000 | O              | -1.917109000 | -0.260432000 | -2.462552000 |
| H | -1.356516000 | -5.835182000 | -2.706357000 | C              | -1.211914000 | -0.106535000 | -1.460684000 |
| H | -2.650710000 | -4.803987000 | -0.859034000 | N              | -0.716386000 | 1.070724000  | -1.035239000 |
| H | -1.501229000 | -4.099403000 | 1.219931000  | C              | -0.806977000 | 2.306298000  | -1.754122000 |
| C | 1.710350000  | -2.419901000 | 4.256581000  | C              | -1.852206000 | 3.195486000  | -1.450746000 |
| C | 2.404128000  | -1.739009000 | 3.097136000  | C              | -1.891524000 | 4.423545000  | -2.118003000 |
| C | 2.123965000  | -0.343076000 | 2.893364000  | H              | -2.687374000 | 5.129156000  | -1.900394000 |
| C | 0.923452000  | 0.263184000  | 3.379768000  | C              | -0.919523000 | 4.752047000  | -3.060379000 |

|   |              |              |              |   |              |              |              |
|---|--------------|--------------|--------------|---|--------------|--------------|--------------|
| C | 0.113401000  | 3.861557000  | -3.338837000 | H | -6.516013000 | -3.009330000 | -1.688467000 |
| H | 0.872972000  | 4.132507000  | -4.065050000 | H | -5.223472000 | -3.892587000 | -2.505769000 |
| C | 0.196234000  | 2.627506000  | -2.685815000 | C | -5.581317000 | 0.043752000  | -2.787517000 |
| H | -0.234830000 | 1.090867000  | -0.127565000 | H | -5.993455000 | -0.606863000 | -0.754810000 |
| C | -2.862136000 | 2.847698000  | -0.371781000 | H | -4.359499000 | 0.037730000  | -0.998256000 |
| C | -4.287596000 | 3.316439000  | -0.688375000 | C | -6.614638000 | -0.841352000 | -3.497317000 |
| H | -2.885417000 | 1.756560000  | -0.299438000 | H | -6.861081000 | -2.904280000 | -4.146784000 |
| H | -4.375346000 | 4.408652000  | -0.669388000 | H | -5.238296000 | -2.258938000 | -4.373747000 |
| H | -4.608639000 | 2.967276000  | -1.675532000 | H | -5.988143000 | 1.047243000  | -2.616434000 |
| H | -4.986677000 | 2.923387000  | 0.059574000  | H | -4.690578000 | 0.165919000  | -3.417322000 |
| C | 1.323070000  | 1.652338000  | -2.983547000 | H | -6.880989000 | -0.409785000 | -4.469380000 |
| C | 0.980153000  | 0.796642000  | -4.217102000 | H | -7.538786000 | -0.868772000 | -2.901263000 |
| H | 1.396290000  | 0.981866000  | -2.124731000 | O | 0.542644000  | 1.280691000  | 1.399564000  |
| H | 0.919201000  | 1.421951000  | -5.116264000 | O | 2.256291000  | 0.424796000  | 0.172669000  |
| H | 1.757225000  | 0.040411000  | -4.386494000 | N | 4.046187000  | 1.043546000  | 1.394130000  |
| H | 0.017061000  | 0.292596000  | -4.090650000 | C | 1.752921000  | 1.142936000  | 1.245399000  |
| H | 0.107341000  | -4.136859000 | -0.718249000 | C | 2.882884000  | 1.472020000  | 2.088531000  |
| C | 2.689357000  | 2.333871000  | -3.135295000 | C | 3.641434000  | 0.423622000  | 0.341273000  |
| H | 2.920630000  | 2.952532000  | -2.263103000 | C | 4.438012000  | -0.260472000 | -0.663213000 |
| H | 3.472482000  | 1.574867000  | -3.234510000 | C | 3.847243000  | -0.842476000 | -1.794003000 |
| H | 2.733930000  | 2.970126000  | -4.027253000 | C | 4.635584000  | -1.500241000 | -2.734294000 |
| C | -2.381542000 | 3.388209000  | 0.988251000  | C | 6.016705000  | -1.586671000 | -2.556784000 |
| H | -3.100624000 | 3.149904000  | 1.780778000  | C | 6.610056000  | -1.007132000 | -1.430135000 |
| H | -1.413930000 | 2.956620000  | 1.260943000  | C | 5.829334000  | -0.347081000 | -0.487649000 |
| H | -2.272274000 | 4.478680000  | 0.949431000  | C | 2.941631000  | 2.874577000  | 2.676860000  |
| C | -3.941527000 | -1.185644000 | 2.222277000  | C | 2.772815000  | 3.869022000  | 1.541241000  |
| C | -3.889179000 | -1.829008000 | 3.615781000  | C | 3.849684000  | 4.203160000  | 0.711348000  |
| C | -3.793513000 | 0.342436000  | 2.279765000  | C | 3.651632000  | 4.985269000  | -0.427341000 |
| H | -4.911489000 | -1.412477000 | 1.764013000  | C | 2.370491000  | 5.428531000  | -0.762703000 |
| C | -4.888672000 | -1.174867000 | 4.577269000  | C | 1.291140000  | 5.104686000  | 0.060304000  |
| H | -2.867705000 | -1.727837000 | 4.000906000  | C | 1.495671000  | 4.341696000  | 1.208820000  |
| H | -4.080637000 | -2.904836000 | 3.523498000  | H | 2.775580000  | -0.785592000 | -1.924217000 |
| C | -4.793230000 | 0.974548000  | 3.254745000  | H | 4.166936000  | -1.957137000 | -3.600840000 |
| H | -2.767067000 | 0.584340000  | 2.581046000  | H | 6.629167000  | -2.105143000 | -3.288888000 |
| H | -3.925681000 | 0.747935000  | 1.271977000  | H | 7.684692000  | -1.074289000 | -1.286383000 |
| C | -4.688046000 | 0.344306000  | 4.648809000  | H | 6.271222000  | 0.103010000  | 0.394731000  |
| H | -4.788468000 | -1.623928000 | 5.572100000  | H | 2.149024000  | 3.022983000  | 3.412928000  |
| H | -5.914556000 | -1.386615000 | 4.240653000  | H | 3.904179000  | 3.001032000  | 3.182399000  |
| H | -4.624340000 | 2.056541000  | 3.305150000  | H | 4.839487000  | 3.822642000  | 0.947017000  |
| H | -5.814699000 | 0.835530000  | 2.870593000  | H | 4.497239000  | 5.234124000  | -1.063199000 |
| H | -5.424427000 | 0.793297000  | 5.325750000  | H | 2.210412000  | 6.011155000  | -1.665156000 |
| H | -3.696139000 | 0.559983000  | 5.070262000  | H | 0.288685000  | 5.426717000  | -0.205299000 |
| C | -4.609623000 | -1.997394000 | -1.672229000 | H | 0.651279000  | 4.077011000  | 1.837859000  |
| C | -5.644330000 | -2.892266000 | -2.351148000 | C | 2.097745000  | 0.666949000  | 4.742001000  |
| C | -5.143703000 | -0.574869000 | -1.454825000 | C | 2.582176000  | -0.065559000 | 3.511575000  |
| H | -3.726925000 | -1.912238000 | -2.307019000 | C | 1.732099000  | -1.091172000 | 2.978949000  |
| C | -6.093387000 | -2.273445000 | -3.683679000 | C | 0.324248000  | -1.092700000 | 3.214760000  |

|                             |              |              |              |   |              |              |              |
|-----------------------------|--------------|--------------|--------------|---|--------------|--------------|--------------|
| C                           | -0.234620000 | -0.190199000 | 4.309176000  | H | -1.804573000 | 7.370233000  | 1.343989000  |
| C                           | 0.616497000  | 1.038271000  | 4.636409000  | C | -0.093194000 | 7.521317000  | 0.058430000  |
| H                           | 3.645254000  | -0.288756000 | 3.494114000  | C | 0.805756000  | 6.830849000  | -0.748499000 |
| H                           | 2.245741000  | -0.008675000 | 5.599619000  | H | 1.600796000  | 7.372375000  | -1.253358000 |
| H                           | 2.713109000  | 1.549211000  | 4.942029000  | C | 0.692903000  | 5.449941000  | -0.935262000 |
| H                           | -1.248407000 | 0.107897000  | 4.023645000  | H | 0.385134000  | 2.802659000  | -0.238422000 |
| H                           | -0.341785000 | -0.824781000 | 5.203062000  | C | -2.344681000 | 4.719885000  | 1.337879000  |
| H                           | 0.480733000  | 1.772065000  | 3.837289000  | C | -3.733120000 | 5.059959000  | 0.770045000  |
| H                           | 0.273245000  | 1.501184000  | 5.569738000  | H | -2.172340000 | 3.649873000  | 1.218095000  |
| O                           | -0.465804000 | -1.883767000 | 2.627976000  | H | -3.944733000 | 6.131251000  | 0.875891000  |
| C                           | 2.260095000  | -2.070270000 | 2.102149000  | H | -3.785835000 | 4.791360000  | -0.286291000 |
| C                           | 2.710405000  | -2.940848000 | 1.376365000  | H | -4.512638000 | 4.511534000  | 1.312298000  |
| C                           | 3.189913000  | -3.974909000 | 0.529595000  | C | 1.669168000  | 4.737360000  | -1.861528000 |
| C                           | 2.429226000  | -5.148836000 | 0.338282000  | C | 1.483596000  | 5.204393000  | -3.315139000 |
| C                           | 4.419230000  | -3.855647000 | -0.150311000 | H | 1.454476000  | 3.668610000  | -1.837966000 |
| C                           | 2.872754000  | -6.150415000 | -0.519871000 | H | 1.706123000  | 6.272203000  | -3.423666000 |
| H                           | 1.494999000  | -5.257728000 | 0.880635000  | H | 2.152346000  | 4.650893000  | -3.985068000 |
| C                           | 4.856132000  | -4.864262000 | -1.002549000 | H | 0.452078000  | 5.044138000  | -3.647442000 |
| H                           | 5.013959000  | -2.960750000 | -0.011645000 | H | -0.142678000 | -0.815437000 | -3.228146000 |
| C                           | 4.086763000  | -6.013945000 | -1.198171000 | C | 3.124878000  | 4.905120000  | -1.397184000 |
| H                           | 2.271171000  | -7.045601000 | -0.655777000 | H | 3.254814000  | 4.537882000  | -0.374629000 |
| H                           | 5.801682000  | -4.744067000 | -1.524376000 | H | 3.797452000  | 4.332212000  | -2.045960000 |
| H                           | 4.430845000  | -6.797101000 | -1.867962000 | H | 3.439645000  | 5.954726000  | -1.424956000 |
| H                           | -1.932093000 | -1.751467000 | 1.846101000  | C | -2.291883000 | 5.025276000  | 2.844339000  |
| H                           | -4.904774000 | -2.718646000 | 0.282710000  | H | -2.998298000 | 4.381523000  | 3.381853000  |
| H                           | -0.964832000 | 5.708403000  | -3.574743000 | H | -1.292736000 | 4.853004000  | 3.256312000  |
| <b>TS3-SSR<sub>a</sub>'</b> |              |              |              | H | -2.565315000 | 6.065077000  | 3.058482000  |
| N                           | -4.237665000 | -0.579130000 | -1.403309000 | C | -3.853359000 | 0.069043000  | 1.414598000  |
| N                           | -2.819350000 | -0.060426000 | 0.368308000  | C | -3.430105000 | -0.698546000 | 2.671858000  |
| N                           | -2.203813000 | 0.446183000  | -1.833260000 | C | -4.091428000 | 1.553169000  | 1.728022000  |
| C                           | -3.074758000 | -0.045228000 | -0.943715000 | H | -4.781943000 | -0.365982000 | 1.030364000  |
| C                           | -2.149351000 | -0.032418000 | -3.224869000 | C | -4.438377000 | -0.503888000 | 3.810787000  |
| H                           | -2.543486000 | -1.049540000 | -3.271899000 | H | -2.442027000 | -0.337402000 | 2.975456000  |
| H                           | -2.756018000 | 0.618086000  | -3.867757000 | H | -3.322456000 | -1.763666000 | 2.449261000  |
| C                           | -0.666496000 | 0.073431000  | -3.581762000 | C | -5.116542000 | 1.732162000  | 2.852622000  |
| C                           | -0.207447000 | 1.305721000  | -2.794408000 | H | -3.131151000 | 1.979566000  | 2.032254000  |
| H                           | -0.441657000 | 2.220505000  | -3.350759000 | H | -4.402328000 | 2.074668000  | 0.816083000  |
| H                           | 0.860227000  | 1.306016000  | -2.570696000 | C | -4.675590000 | 0.980529000  | 4.115236000  |
| C                           | -1.038070000 | 1.268680000  | -1.484844000 | H | -4.079092000 | -1.033104000 | 4.701055000  |
| H                           | -0.459383000 | 0.790390000  | -0.695518000 | H | -5.395923000 | -0.971153000 | 3.534920000  |
| H                           | -0.513583000 | 0.181969000  | -4.659582000 | H | -5.248174000 | 2.800089000  | 3.065679000  |
| O                           | -2.491185000 | 3.205627000  | -1.472160000 | H | -6.097740000 | 1.354416000  | 2.527195000  |
| C                           | -1.433084000 | 2.701030000  | -1.110479000 | H | -5.423196000 | 1.091868000  | 4.910188000  |
| N                           | -0.439859000 | 3.352085000  | -0.451612000 | H | -3.742765000 | 1.426257000  | 4.488848000  |
| C                           | -0.347391000 | 4.767687000  | -0.270558000 | C | -5.127894000 | 0.035772000  | -2.403217000 |
| C                           | -1.249951000 | 5.443673000  | 0.573331000  | C | -6.488037000 | -0.666496000 | -2.340493000 |
| C                           | -1.110041000 | 6.829288000  | 0.707964000  | C | -5.289203000 | 1.546728000  | -2.186266000 |

|   |              |              |              |   |              |              |              |
|---|--------------|--------------|--------------|---|--------------|--------------|--------------|
| H | -4.716567000 | -0.134249000 | -3.406681000 | C | 3.129397000  | 1.659841000  | 3.146336000  |
| C | -7.455758000 | -0.075102000 | -3.373838000 | C | 2.685854000  | 0.316295000  | 2.493865000  |
| H | -6.904267000 | -0.537650000 | -1.329971000 | C | 1.175035000  | 0.156272000  | 2.390908000  |
| H | -6.357467000 | -1.740657000 | -2.504260000 | C | 0.313537000  | 1.300989000  | 2.253880000  |
| C | -6.243440000 | 2.141493000  | -3.228883000 | C | 0.865558000  | 2.634814000  | 2.736628000  |
| H | -5.701732000 | 1.702997000  | -1.178921000 | C | 1.968632000  | 2.428696000  | 3.776593000  |
| H | -4.320440000 | 2.053317000  | -2.209377000 | H | 3.074701000  | -0.511854000 | 3.094409000  |
| C | -7.608575000 | 1.442288000  | -3.203700000 | H | 3.586105000  | 2.316376000  | 2.394570000  |
| H | -8.429618000 | -0.572379000 | -3.293498000 | H | 3.915536000  | 1.462462000  | 3.881248000  |
| H | -7.076624000 | -0.290997000 | -4.383051000 | H | 0.019731000  | 3.202559000  | 3.133078000  |
| H | -6.357189000 | 3.216850000  | -3.051601000 | H | 1.254410000  | 3.211811000  | 1.886269000  |
| H | -5.798991000 | 2.036817000  | -4.229687000 | H | 1.563390000  | 1.871536000  | 4.630592000  |
| H | -8.263210000 | 1.846082000  | -3.985504000 | H | 2.324333000  | 3.392501000  | 4.159592000  |
| H | -8.100276000 | 1.648829000  | -2.242113000 | O | -0.868785000 | 1.249859000  | 1.847503000  |
| H | -1.881805000 | 0.193919000  | 0.704377000  | C | 0.607220000  | -1.073493000 | 2.509475000  |
| H | -4.646181000 | -1.294414000 | -0.816087000 | C | 0.107289000  | -2.233704000 | 2.603428000  |
| O | 2.031481000  | 1.680430000  | -0.292037000 | C | -0.499756000 | -3.026511000 | 3.666782000  |
| O | 4.276002000  | 1.871758000  | -0.172274000 | C | -1.123688000 | -2.408321000 | 4.767467000  |
| N | 4.848343000  | 0.215475000  | 1.275493000  | C | -0.515471000 | -4.430331000 | 3.587602000  |
| C | 3.080293000  | 1.279839000  | 0.152490000  | C | -1.748565000 | -3.169137000 | 5.751186000  |
| C | 3.397055000  | 0.131005000  | 1.104825000  | H | -1.112507000 | -1.324539000 | 4.832891000  |
| C | 5.262813000  | 1.167833000  | 0.538561000  | C | -1.135847000 | -5.188552000 | 4.580003000  |
| C | 6.635147000  | 1.621116000  | 0.333938000  | H | -0.043237000 | -4.919604000 | 2.740508000  |
| C | 6.921045000  | 2.710483000  | -0.499917000 | C | -1.758402000 | -4.564134000 | 5.661886000  |
| C | 8.242137000  | 3.115496000  | -0.678611000 | H | -2.225958000 | -2.673596000 | 6.592855000  |
| C | 9.276819000  | 2.439293000  | -0.030847000 | H | -1.135976000 | -6.272687000 | 4.504065000  |
| C | 8.991136000  | 1.351936000  | 0.800741000  | H | -2.247143000 | -5.157580000 | 6.429612000  |
| C | 7.676066000  | 0.941301000  | 0.984506000  | H | 0.001363000  | 8.596556000  | 0.184022000  |
| C | 3.019566000  | -1.208324000 | 0.422521000  | O | -0.240350000 | -1.490341000 | -0.983387000 |
| C | 3.712629000  | -1.412389000 | -0.902539000 | O | 1.109467000  | -3.304151000 | -1.273731000 |
| C | 5.012587000  | -1.926770000 | -0.968967000 | N | 0.167267000  | -4.817797000 | 0.108773000  |
| C | 5.649142000  | -2.096356000 | -2.198383000 | C | 0.011468000  | -2.654789000 | -0.717661000 |
| C | 4.992415000  | -1.750046000 | -3.380701000 | C | -0.538270000 | -3.584644000 | 0.259346000  |
| C | 3.695867000  | -1.234190000 | -3.324310000 | C | 1.123078000  | -4.580290000 | -0.721630000 |
| C | 3.062106000  | -1.066497000 | -2.093775000 | C | 2.222536000  | -5.444183000 | -1.130020000 |
| H | 6.111511000  | 3.230127000  | -1.000011000 | C | 3.231137000  | -4.963593000 | -1.980078000 |
| H | 8.463215000  | 3.959789000  | -1.324779000 | C | 4.289814000  | -5.794761000 | -2.337949000 |
| H | 10.305648000 | 2.757526000  | -0.173043000 | C | 4.351036000  | -7.104559000 | -1.859864000 |
| H | 9.796425000  | 0.825206000  | 1.304150000  | C | 3.345537000  | -7.584362000 | -1.013854000 |
| H | 7.431357000  | 0.099874000  | 1.623755000  | C | 2.287388000  | -6.760987000 | -0.646323000 |
| H | 1.939890000  | -1.197824000 | 0.280924000  | C | -2.013354000 | -3.585003000 | 0.576996000  |
| H | 3.263806000  | -2.011675000 | 1.124229000  | C | -2.997302000 | -3.788529000 | -0.557435000 |
| H | 5.523640000  | -2.195267000 | -0.049414000 | C | -4.365641000 | -3.833978000 | -0.244394000 |
| H | 6.656554000  | -2.502016000 | -2.232807000 | C | -5.329412000 | -3.987541000 | -1.239677000 |
| H | 5.485958000  | -1.884747000 | -4.339328000 | C | -4.941288000 | -4.087393000 | -2.578799000 |
| H | 3.172681000  | -0.971925000 | -4.240058000 | C | -3.586014000 | -4.042721000 | -2.901829000 |
| H | 2.040572000  | -0.705094000 | -2.046394000 | C | -2.623482000 | -3.900711000 | -1.899115000 |

|                             |              |              |              |   |              |              |              |
|-----------------------------|--------------|--------------|--------------|---|--------------|--------------|--------------|
| H                           | 3.188215000  | -3.944460000 | -2.344583000 | C | 4.238608000  | 5.095531000  | -0.250882000 |
| H                           | 5.070958000  | -5.409672000 | -2.987096000 | H | 3.399640000  | 3.136717000  | -0.162386000 |
| H                           | 5.178946000  | -7.749848000 | -2.140465000 | H | 4.856924000  | 5.779878000  | 0.341444000  |
| H                           | 3.391026000  | -8.602812000 | -0.638209000 | H | 4.753175000  | 4.915266000  | -1.202327000 |
| H                           | 1.503216000  | -7.113609000 | 0.015510000  | H | 3.289961000  | 5.601649000  | -0.460971000 |
| H                           | -2.235499000 | -2.616879000 | 1.035853000  | H | 0.232265000  | 1.174977000  | -3.697722000 |
| H                           | -2.191781000 | -4.335470000 | 1.354305000  | C | 5.316675000  | 3.021092000  | 0.748584000  |
| H                           | -4.670628000 | -3.765318000 | 0.798218000  | H | 5.132278000  | 2.065688000  | 1.248203000  |
| H                           | -6.381851000 | -4.034031000 | -0.971925000 | H | 5.823608000  | 2.810354000  | -0.200200000 |
| H                           | -5.688079000 | -4.210532000 | -3.358179000 | H | 5.999777000  | 3.608546000  | 1.373071000  |
| H                           | -3.270629000 | -4.132555000 | -3.937936000 | C | -0.363647000 | 2.491697000  | 4.671240000  |
| H                           | -1.573233000 | -3.890493000 | -2.169143000 | H | -1.361390000 | 2.041215000  | 4.735708000  |
| H                           | -0.073049000 | -2.967122000 | 1.338410000  | H | 0.376185000  | 1.687437000  | 4.720245000  |
| <b>TS3-SSS<sub>a</sub>'</b> |              |              |              | H | -0.230209000 | 3.126802000  | 5.554734000  |
| N                           | -3.533164000 | 2.566825000  | -1.766333000 | C | -3.683315000 | 1.272979000  | 0.802901000  |
| N                           | -2.475550000 | 1.406010000  | -0.031334000 | C | -4.425099000 | -0.034701000 | 0.492274000  |
| N                           | -1.212336000 | 2.399752000  | -1.713753000 | C | -3.297832000 | 1.377372000  | 2.283420000  |
| C                           | -2.392871000 | 2.126087000  | -1.143464000 | H | -4.334424000 | 2.127311000  | 0.578261000  |
| C                           | -1.051935000 | 2.806106000  | -3.118566000 | C | -5.640316000 | -0.224287000 | 1.409560000  |
| H                           | -1.866237000 | 2.399419000  | -3.717199000 | H | -3.738651000 | -0.880350000 | 0.619602000  |
| H                           | -1.051104000 | 3.901094000  | -3.194249000 | H | -4.739539000 | -0.041496000 | -0.562441000 |
| C                           | 0.321400000  | 2.241413000  | -3.473117000 | C | -4.519609000 | 1.179789000  | 3.188263000  |
| C                           | 1.109353000  | 2.469884000  | -2.179650000 | H | -2.530326000 | 0.630941000  | 2.504740000  |
| H                           | 1.425170000  | 3.517456000  | -2.112068000 | H | -2.837638000 | 2.353991000  | 2.456162000  |
| H                           | 1.993346000  | 1.842067000  | -2.074760000 | C | -5.238353000 | -0.141467000 | 2.887001000  |
| C                           | 0.083137000  | 2.166911000  | -1.061380000 | H | -6.103514000 | -1.192631000 | 1.196297000  |
| H                           | 0.166975000  | 1.124947000  | -0.742588000 | H | -6.394691000 | 0.548931000  | 1.195088000  |
| H                           | 0.763980000  | 2.744099000  | -4.337753000 | H | -4.203805000 | 1.217803000  | 4.238061000  |
| O                           | -0.373892000 | 4.141233000  | 0.263076000  | H | -5.221437000 | 2.015134000  | 3.044202000  |
| C                           | 0.292733000  | 3.120758000  | 0.125902000  | H | -6.123588000 | -0.245750000 | 3.525829000  |
| N                           | 1.326269000  | 2.745412000  | 0.917100000  | H | -4.575971000 | -0.983672000 | 3.124118000  |
| C                           | 1.905135000  | 3.536287000  | 1.959936000  | C | -3.756462000 | 4.000099000  | -2.066273000 |
| C                           | 1.183669000  | 3.792453000  | 3.141861000  | C | -5.174875000 | 4.158523000  | -2.618936000 |
| C                           | 1.809240000  | 4.550853000  | 4.137865000  | C | -3.524238000 | 4.896073000  | -0.841591000 |
| H                           | 1.267678000  | 4.768516000  | 5.053634000  | H | -3.056791000 | 4.296432000  | -2.853373000 |
| C                           | 3.109456000  | 5.019900000  | 3.983013000  | C | -5.469770000 | 5.627254000  | -2.953412000 |
| C                           | 3.808610000  | 4.744462000  | 2.812129000  | H | -5.892580000 | 3.808817000  | -1.860284000 |
| H                           | 4.822240000  | 5.115762000  | 2.690803000  | H | -5.303561000 | 3.521792000  | -3.502544000 |
| C                           | 3.221196000  | 4.008359000  | 1.778962000  | C | -3.812105000 | 6.363380000  | -1.184269000 |
| H                           | 1.820033000  | 1.900247000  | 0.649444000  | H | -4.199539000 | 4.568327000  | -0.036908000 |
| C                           | -0.234164000 | 3.290671000  | 3.363866000  | H | -2.498989000 | 4.771174000  | -0.477801000 |
| C                           | -1.223515000 | 4.469517000  | 3.342369000  | C | -5.230094000 | 6.540536000  | -1.743202000 |
| H                           | -0.482965000 | 2.606619000  | 2.550848000  | H | -6.500988000 | 5.724280000  | -3.311932000 |
| H                           | -0.994118000 | 5.185154000  | 4.141182000  | H | -4.819211000 | 5.943193000  | -3.781355000 |
| H                           | -1.173716000 | 4.986920000  | 2.382105000  | H | -3.667209000 | 6.986271000  | -0.294541000 |
| H                           | -2.250141000 | 4.118053000  | 3.501135000  | H | -3.080668000 | 6.710332000  | -1.928630000 |
| C                           | 3.999166000  | 3.770078000  | 0.492278000  | H | -5.404692000 | 7.586551000  | -2.021676000 |

|   |              |              |              |   |              |              |              |
|---|--------------|--------------|--------------|---|--------------|--------------|--------------|
| H | -5.960394000 | 6.297253000  | -0.957971000 | O | -0.497679000 | 0.273827000  | 1.457733000  |
| H | -1.652346000 | 0.882123000  | 0.317807000  | C | 0.024972000  | -1.577598000 | -0.529373000 |
| H | -4.365346000 | 2.122186000  | -1.399547000 | C | -0.834914000 | -1.813164000 | -1.436323000 |
| O | 3.014808000  | 0.630135000  | -0.285835000 | C | -1.101136000 | -1.302299000 | -2.784806000 |
| O | 5.004472000  | -0.404601000 | -0.046947000 | C | -2.269031000 | -0.558662000 | -3.026064000 |
| N | 4.461146000  | -2.600100000 | -0.268461000 | C | -0.255928000 | -1.585296000 | -3.871404000 |
| C | 3.651153000  | -0.395362000 | -0.274841000 | C | -2.565144000 | -0.084334000 | -4.301517000 |
| C | 3.221887000  | -1.846116000 | -0.468240000 | H | -2.941185000 | -0.360339000 | -2.199268000 |
| C | 5.392288000  | -1.754225000 | -0.067105000 | C | -0.552437000 | -1.105200000 | -5.146912000 |
| C | 6.814403000  | -2.009117000 | 0.137139000  | H | 0.625598000  | -2.197035000 | -3.719538000 |
| C | 7.719254000  | -0.954370000 | 0.318835000  | C | -1.703820000 | -0.347277000 | -5.369625000 |
| C | 9.072634000  | -1.229894000 | 0.501662000  | H | -3.473866000 | 0.490981000  | -4.458503000 |
| C | 9.525635000  | -2.549924000 | 0.504237000  | H | 0.119656000  | -1.331396000 | -5.970096000 |
| C | 8.622400000  | -3.602013000 | 0.323210000  | H | -1.935286000 | 0.019398000  | -6.365429000 |
| C | 7.270504000  | -3.336333000 | 0.139666000  | H | 3.577314000  | 5.600016000  | 4.773817000  |
| C | 2.726526000  | -2.060654000 | -1.919242000 | O | -1.833126000 | -5.712721000 | -1.299223000 |
| C | 3.678560000  | -1.561107000 | -2.978435000 | O | -1.475855000 | -4.821807000 | 0.793548000  |
| C | 4.859081000  | -2.248072000 | -3.292965000 | N | -2.834752000 | -3.023053000 | 0.737522000  |
| C | 5.741458000  | -1.741841000 | -4.246309000 | C | -2.059618000 | -4.825340000 | -0.505359000 |
| C | 5.454735000  | -0.544830000 | -4.905722000 | C | -2.801960000 | -3.573200000 | -0.564904000 |
| C | 4.274835000  | 0.138799000  | -4.612114000 | C | -2.013465000 | -3.732301000 | 1.440550000  |
| C | 3.395283000  | -0.368791000 | -3.656227000 | C | -1.598962000 | -3.489986000 | 2.813634000  |
| H | 7.359304000  | 0.068323000  | 0.313856000  | C | -0.932978000 | -4.475544000 | 3.559633000  |
| H | 9.773781000  | -0.412701000 | 0.642012000  | C | -0.556267000 | -4.217373000 | 4.876163000  |
| H | 10.581550000 | -2.760747000 | 0.647294000  | C | -0.830430000 | -2.978074000 | 5.459758000  |
| H | 8.975018000  | -4.629065000 | 0.325972000  | C | -1.487016000 | -1.992306000 | 4.716546000  |
| H | 6.552467000  | -4.137106000 | -0.001353000 | C | -1.864093000 | -2.243255000 | 3.402291000  |
| H | 1.777574000  | -1.537525000 | -2.013963000 | C | -3.970827000 | -3.410601000 | -1.508403000 |
| H | 2.529784000  | -3.132702000 | -2.027565000 | C | -5.264378000 | -3.999577000 | -0.981753000 |
| H | 5.084624000  | -3.178159000 | -2.781468000 | C | -5.359534000 | -5.366454000 | -0.686764000 |
| H | 6.653901000  | -2.284783000 | -4.476655000 | C | -6.540808000 | -5.901045000 | -0.176472000 |
| H | 6.143587000  | -0.152406000 | -5.648483000 | C | -7.649290000 | -5.080105000 | 0.047333000  |
| H | 4.036322000  | 1.065025000  | -5.127837000 | C | -7.567726000 | -3.720743000 | -0.251205000 |
| H | 2.469737000  | 0.154961000  | -3.438544000 | C | -6.382337000 | -3.189512000 | -0.764140000 |
| C | 2.828505000  | -2.220932000 | 2.006990000  | H | -0.720866000 | -5.434307000 | 3.099144000  |
| C | 2.153360000  | -2.256928000 | 0.611139000  | H | -0.043253000 | -4.985440000 | 5.448216000  |
| C | 0.869500000  | -1.429139000 | 0.525763000  | H | -0.529546000 | -2.779326000 | 6.484465000  |
| C | 0.465098000  | -0.520702000 | 1.569946000  | H | -1.691933000 | -1.020552000 | 5.158021000  |
| C | 1.219307000  | -0.546102000 | 2.883592000  | H | -2.344640000 | -1.481920000 | 2.802744000  |
| C | 1.858544000  | -1.908512000 | 3.139820000  | H | -3.691236000 | -3.896985000 | -2.451009000 |
| H | 1.903826000  | -3.297343000 | 0.372502000  | H | -4.125438000 | -2.350593000 | -1.732559000 |
| H | 3.608674000  | -1.447207000 | 2.025771000  | H | -4.500542000 | -6.008092000 | -0.862012000 |
| H | 3.344345000  | -3.171320000 | 2.169310000  | H | -6.597794000 | -6.963207000 | 0.046785000  |
| H | 0.510332000  | -0.269301000 | 3.666099000  | H | -8.568394000 | -5.498779000 | 0.448224000  |
| H | 1.990897000  | 0.239715000  | 2.858481000  | H | -8.424547000 | -3.072281000 | -0.086170000 |
| H | 1.079447000  | -2.672964000 | 3.204535000  | H | -6.322829000 | -2.130056000 | -1.001646000 |
| H | 2.390524000  | -1.908780000 | 4.098077000  | H | -1.743480000 | -2.709439000 | -1.086921000 |

**TS5-SS**

|   |              |              |              |   |              |              |              |
|---|--------------|--------------|--------------|---|--------------|--------------|--------------|
|   |              |              |              | C | -2.639402000 | 6.244150000  | 2.986580000  |
| N | -4.793716000 | -2.482168000 | -0.890315000 | C | -1.382724000 | 6.447120000  | 3.849622000  |
| N | -2.548145000 | -2.252445000 | -0.233842000 | C | -3.894239000 | 6.097384000  | 3.863134000  |
| N | -3.323806000 | -1.166774000 | -2.117611000 | H | -2.768318000 | 7.143495000  | 2.369525000  |
| C | -3.548559000 | -1.968671000 | -1.063673000 | H | -0.493600000 | 6.578170000  | 3.224014000  |
| C | -4.090668000 | -1.183128000 | -3.366868000 | H | -1.488550000 | 7.330888000  | 4.489850000  |
| H | -4.411776000 | -2.202271000 | -3.592860000 | H | -1.207993000 | 5.581616000  | 4.499228000  |
| H | -4.975538000 | -0.538564000 | -3.299987000 | H | -3.817685000 | 5.220829000  | 4.516986000  |
| C | -3.073927000 | -0.601754000 | -4.352028000 | H | -4.028099000 | 6.978975000  | 4.501046000  |
| C | -2.393274000 | 0.503062000  | -3.526446000 | H | -4.792096000 | 5.976944000  | 3.247704000  |
| H | -2.982274000 | 1.424420000  | -3.572988000 | C | -2.667524000 | -3.011271000 | 1.015009000  |
| H | -1.382189000 | 0.732844000  | -3.868597000 | C | -2.561347000 | -4.524160000 | 0.752447000  |
| C | -2.383554000 | -0.038796000 | -2.071113000 | C | -1.572658000 | -2.561595000 | 1.988017000  |
| H | -1.383993000 | -0.363963000 | -1.776950000 | H | -3.644685000 | -2.773431000 | 1.456208000  |
| H | -3.547198000 | -0.221652000 | -5.261553000 | C | -2.624477000 | -5.323156000 | 2.061399000  |
| O | -4.150259000 | 1.150138000  | -0.922740000 | H | -1.609861000 | -4.703251000 | 0.237004000  |
| C | -2.935005000 | 1.030279000  | -1.106095000 | H | -3.353566000 | -4.853164000 | 0.065644000  |
| N | -1.963961000 | 1.812275000  | -0.605929000 | C | -1.660697000 | -3.339882000 | 3.305168000  |
| C | -2.175488000 | 2.908974000  | 0.286521000  | H | -0.604198000 | -2.739704000 | 1.509933000  |
| C | -2.151540000 | 2.676734000  | 1.672079000  | H | -1.653472000 | -1.485602000 | 2.157110000  |
| C | -2.307679000 | 3.769507000  | 2.526792000  | C | -1.563241000 | -4.851256000 | 3.064274000  |
| H | -2.298022000 | 3.601817000  | 3.600136000  | H | -2.503193000 | -6.391578000 | 1.847920000  |
| C | -2.477383000 | 5.067707000  | 2.039248000  | H | -3.621820000 | -5.205051000 | 2.510703000  |
| C | -2.482989000 | 5.261515000  | 0.656763000  | H | -0.863056000 | -3.012974000 | 3.980992000  |
| H | -2.603176000 | 6.270573000  | 0.273180000  | H | -2.611848000 | -3.106926000 | 3.806332000  |
| C | -2.323743000 | 4.202230000  | -0.240750000 | H | -1.668539000 | -5.397033000 | 4.009197000  |
| H | -1.020888000 | 1.377816000  | -0.592545000 | H | -0.563146000 | -5.086340000 | 2.675352000  |
| C | -2.019464000 | 1.269104000  | 2.232479000  | C | -5.978604000 | -1.590685000 | -0.856543000 |
| C | -3.392328000 | 0.787317000  | 2.735318000  | C | -7.156634000 | -2.204726000 | -1.612820000 |
| H | -1.713756000 | 0.612703000  | 1.414833000  | C | -6.347190000 | -1.262736000 | 0.596094000  |
| H | -3.746816000 | 1.407165000  | 3.567393000  | H | -5.670946000 | -0.653713000 | -1.323961000 |
| H | -4.130202000 | 0.850768000  | 1.928722000  | C | -8.375120000 | -1.271301000 | -1.561337000 |
| H | -3.342723000 | -0.250668000 | 3.088656000  | H | -7.412930000 | -3.172353000 | -1.156044000 |
| C | -2.335908000 | 4.425305000  | -1.744395000 | H | -6.866285000 | -2.411216000 | -2.649419000 |
| C | -3.774995000 | 4.330273000  | -2.287024000 | C | -7.560733000 | -0.325425000 | 0.644290000  |
| H | -1.755011000 | 3.610624000  | -2.189142000 | H | -6.577801000 | -2.197004000 | 1.132556000  |
| H | -4.387401000 | 5.148704000  | -1.888810000 | H | -5.486047000 | -0.800127000 | 1.089610000  |
| H | -3.781781000 | 4.407488000  | -3.381855000 | C | -8.754096000 | -0.918779000 | -0.116315000 |
| H | -4.246679000 | 3.387542000  | -1.994950000 | H | -9.222627000 | -1.735354000 | -2.079035000 |
| H | -2.349977000 | -1.373616000 | -4.633424000 | H | -8.139428000 | -0.347122000 | -2.107946000 |
| C | -1.672374000 | 5.741487000  | -2.168659000 | H | -7.831512000 | -0.120596000 | 1.686458000  |
| H | -0.665099000 | 5.827608000  | -1.750504000 | H | -7.275988000 | 0.636235000  | 0.196808000  |
| H | -2.254912000 | 6.614833000  | -1.853009000 | H | -9.596041000 | -0.216627000 | -0.108272000 |
| C | -0.933985000 | 1.158986000  | 3.312905000  | H | -9.097034000 | -1.827932000 | 0.398951000  |
| H | -0.854320000 | 0.124967000  | 3.669154000  | H | -1.584252000 | -2.162657000 | -0.587097000 |
| H | 0.043212000  | 1.450780000  | 2.915033000  | H | -1.592590000 | 5.783550000  | -3.261211000 |
| H | -1.152195000 | 1.787288000  | 4.183755000  | H | -4.842640000 | -3.253898000 | -0.236256000 |

|   |             |              |              |               |             |              |              |
|---|-------------|--------------|--------------|---------------|-------------|--------------|--------------|
| O | 0.059430000 | -2.663614000 | -0.936530000 | H             | 9.528010000 | 3.567616000  | 0.154917000  |
| O | 1.746540000 | -1.450886000 | -1.889251000 | C             | 1.565368000 | 2.150887000  | -0.774476000 |
| N | 3.498794000 | -2.074733000 | -0.605245000 | C             | 1.072793000 | 2.269946000  | -2.081829000 |
| C | 1.222996000 | -2.276782000 | -0.912206000 | C             | 2.197650000 | 3.253120000  | -0.185106000 |
| C | 2.328161000 | -2.542095000 | 0.008999000  | C             | 1.232790000 | 3.452474000  | -2.798570000 |
| C | 3.111442000 | -1.353757000 | -1.609738000 | H             | 0.583994000 | 1.412030000  | -2.530305000 |
| C | 3.906503000 | -0.462207000 | -2.432399000 | C             | 2.342647000 | 4.443643000  | -0.895801000 |
| C | 3.348660000 | 0.217767000  | -3.525616000 | H             | 2.568331000 | 3.178415000  | 0.830040000  |
| C | 4.115932000 | 1.130487000  | -4.243268000 | C             | 1.870046000 | 4.544397000  | -2.206202000 |
| C | 5.443560000 | 1.370277000  | -3.882369000 | H             | 0.862151000 | 3.524135000  | -3.817589000 |
| C | 6.006216000 | 0.686173000  | -2.801361000 | H             | 2.825586000 | 5.294893000  | -0.424212000 |
| C | 5.244685000 | -0.223203000 | -2.076703000 | H             | 1.993781000 | 5.470236000  | -2.761120000 |
| C | 2.348298000 | -3.829935000 | 0.795322000  | H             | 0.924136000 | -1.110357000 | 1.473175000  |
| C | 2.271796000 | -5.051208000 | -0.099569000 | C             | 2.742893000 | -1.475222000 | 2.574004000  |
| C | 1.202659000 | -5.946496000 | -0.002357000 | C             | 2.019644000 | -1.832845000 | 3.722532000  |
| C | 1.121156000 | -7.061435000 | -0.838015000 | C             | 4.141131000 | -1.623003000 | 2.591500000  |
| C | 2.113564000 | -7.293543000 | -1.789624000 | C             | 2.665625000 | -2.304379000 | 4.864148000  |
| C | 3.185951000 | -6.404374000 | -1.896155000 | H             | 0.939582000 | -1.714653000 | 3.720488000  |
| C | 3.264288000 | -5.292924000 | -1.059106000 | C             | 4.784744000 | -2.102662000 | 3.729355000  |
| H | 2.314535000 | 0.035119000  | -3.793605000 | H             | 4.704211000 | -1.393653000 | 1.696304000  |
| H | 3.673487000 | 1.663969000  | -5.079874000 | C             | 4.053782000 | -2.441090000 | 4.871367000  |
| H | 6.036632000 | 2.091838000  | -4.437449000 | H             | 2.085154000 | -2.565462000 | 5.745126000  |
| H | 7.031500000 | 0.883041000  | -2.504844000 | H             | 5.865278000 | -2.219635000 | 3.723418000  |
| H | 5.657045000 | -0.739723000 | -1.218961000 | H             | 4.562590000 | -2.812944000 | 5.756433000  |
| H | 3.266508000 | -3.847628000 | 1.389352000  | <b>TS5-RR</b> |             |              |              |
| H | 1.515143000 | -3.841925000 | 1.505842000  | N             | 4.982953000 | -2.478288000 | 0.333848000  |
| H | 0.428330000 | -5.769394000 | 0.739185000  | N             | 2.742836000 | -2.138991000 | -0.327316000 |
| H | 0.281795000 | -7.746112000 | -0.745880000 | N             | 3.419966000 | -1.578844000 | 1.798590000  |
| H | 2.053757000 | -8.159445000 | -2.443347000 | C             | 3.709362000 | -2.062203000 | 0.582287000  |
| H | 3.964132000 | -6.577713000 | -2.634811000 | C             | 4.153887000 | -1.890510000 | 3.028362000  |
| H | 4.090218000 | -4.593371000 | -1.150180000 | H             | 4.536818000 | -2.912535000 | 2.984656000  |
| C | 1.999348000 | -0.981318000 | 1.396123000  | H             | 4.998265000 | -1.204091000 | 3.171836000  |
| C | 2.348425000 | 0.250398000  | 0.742417000  | C             | 3.078409000 | -1.651546000 | 4.091811000  |
| C | 1.334799000 | 0.859317000  | -0.057996000 | C             | 2.353953000 | -0.402916000 | 3.563473000  |
| O | 0.209926000 | 0.298312000  | -0.222025000 | H             | 2.905845000 | 0.496723000  | 3.851758000  |
| C | 3.647004000 | 0.795266000  | 0.772888000  | H             | 1.327256000 | -0.302481000 | 3.919688000  |
| C | 4.760510000 | 1.289135000  | 0.736785000  | C             | 2.373516000 | -0.570271000 | 2.023629000  |
| C | 6.030979000 | 1.901537000  | 0.606982000  | H             | 1.401252000 | -0.921360000 | 1.679495000  |
| C | 7.138830000 | 1.462264000  | 1.359305000  | H             | 3.504304000 | -1.508078000 | 5.088829000  |
| C | 6.210340000 | 2.958865000  | -0.311103000 | O             | 3.970895000 | 0.991489000  | 1.097746000  |
| C | 8.385146000 | 2.058715000  | 1.192583000  | C             | 2.784826000 | 0.737810000  | 1.325277000  |
| H | 7.003502000 | 0.651594000  | 2.068884000  | N             | 1.735526000 | 1.539031000  | 1.062256000  |
| C | 7.459303000 | 3.550931000  | -0.465230000 | C             | 1.824415000 | 2.900060000  | 0.638098000  |
| H | 5.360805000 | 3.287892000  | -0.900618000 | C             | 2.245465000 | 3.223033000  | -0.661422000 |
| C | 8.553490000 | 3.104543000  | 0.281550000  | C             | 2.244756000 | 4.568591000  | -1.040102000 |
| H | 9.230727000 | 1.706566000  | 1.777596000  | H             | 2.569904000 | 4.828234000  | -2.043723000 |
| H | 7.582735000 | 4.362868000  | -1.177351000 | C             | 1.812529000 | 5.579146000  | -0.180707000 |



|   |              |              |              |   |              |              |              |
|---|--------------|--------------|--------------|---|--------------|--------------|--------------|
| C | 1.388606000  | 5.220440000  | 1.100360000  | H | 1.202369000  | -1.495918000 | -4.603932000 |
| H | 1.038678000  | 6.000056000  | 1.769644000  | H | 2.908024000  | -1.923682000 | -4.498290000 |
| C | 1.387983000  | 3.895012000  | 1.533779000  | H | 1.586787000  | -3.902294000 | -5.228621000 |
| H | 0.800345000  | 1.179362000  | 1.330404000  | H | 0.554554000  | -3.769172000 | -3.804426000 |
| C | 2.662691000  | 2.160251000  | -1.663491000 | C | 6.103268000  | -1.520805000 | 0.511651000  |
| C | 4.173079000  | 2.227025000  | -1.940857000 | C | 7.364428000  | -2.234276000 | 0.995464000  |
| H | 2.447621000  | 1.185268000  | -1.217642000 | C | 6.348346000  | -0.744949000 | -0.788222000 |
| H | 4.444812000  | 3.183723000  | -2.402972000 | H | 5.771590000  | -0.795117000 | 1.256151000  |
| H | 4.728633000  | 2.119459000  | -1.006412000 | C | 8.517309000  | -1.233502000 | 1.165538000  |
| H | 4.476410000  | 1.426966000  | -2.628642000 | H | 7.648642000  | -3.002343000 | 0.260423000  |
| C | 0.970506000  | 3.521150000  | 2.948271000  | H | 7.156976000  | -2.757114000 | 1.936455000  |
| C | 2.224350000  | 3.417446000  | 3.838475000  | C | 7.495670000  | 0.257067000  | -0.612039000 |
| H | 0.501832000  | 2.533010000  | 2.909497000  | H | 6.596815000  | -1.455544000 | -1.592723000 |
| H | 2.684769000  | 4.404993000  | 3.962458000  | H | 5.427842000  | -0.225372000 | -1.070431000 |
| H | 1.967084000  | 3.034150000  | 4.833394000  | C | 8.772649000  | -0.440063000 | -0.123819000 |
| H | 2.977087000  | 2.759112000  | 3.393322000  | H | 9.425777000  | -1.761097000 | 1.478579000  |
| H | 2.396157000  | -2.507704000 | 4.124317000  | H | 8.265059000  | -0.533741000 | 1.974997000  |
| C | -0.059800000 | 4.474642000  | 3.564226000  | H | 7.679047000  | 0.783444000  | -1.555799000 |
| H | -0.929725000 | 4.588742000  | 2.911242000  | H | 7.186230000  | 1.017691000  | 0.117381000  |
| H | 0.363436000  | 5.467523000  | 3.757168000  | H | 9.569108000  | 0.295628000  | 0.038875000  |
| C | 1.851675000  | 2.263862000  | -2.966023000 | H | 9.132294000  | -1.126215000 | -0.904561000 |
| H | 2.092951000  | 1.431953000  | -3.639018000 | H | 1.773671000  | -2.169568000 | 0.037320000  |
| H | 0.776658000  | 2.240193000  | -2.764385000 | O | 0.248679000  | -2.595542000 | 0.724634000  |
| H | 2.070433000  | 3.192956000  | -3.504074000 | O | -0.857628000 | -1.215464000 | -0.726957000 |
| C | 1.749808000  | 7.026465000  | -0.636303000 | N | -2.932824000 | -2.111154000 | -0.664006000 |
| C | 0.641537000  | 7.216659000  | -1.686766000 | C | -0.805171000 | -2.232085000 | 0.205163000  |
| C | 3.102399000  | 7.534716000  | -1.158872000 | C | -2.173841000 | -2.700541000 | 0.363704000  |
| H | 1.482770000  | 7.631835000  | 0.240189000  | C | -2.183713000 | -1.198597000 | -1.187116000 |
| H | -0.325252000 | 6.883420000  | -1.295200000 | C | -2.521781000 | -0.201515000 | -2.185692000 |
| H | 0.553285000  | 8.269686000  | -1.979475000 | C | -1.524770000 | 0.490912000  | -2.890626000 |
| H | 0.856141000  | 6.632292000  | -2.589430000 | C | -1.877416000 | 1.472229000  | -3.811705000 |
| H | 3.412067000  | 6.989111000  | -2.057742000 | C | -3.223078000 | 1.777741000  | -4.030500000 |
| H | 3.041385000  | 8.597383000  | -1.421160000 | C | -4.217913000 | 1.083576000  | -3.337459000 |
| H | 3.887635000  | 7.409938000  | -0.405788000 | C | -3.873656000 | 0.092329000  | -2.423927000 |
| C | 2.879019000  | -2.528096000 | -1.733452000 | C | -2.380670000 | -4.163731000 | 0.683235000  |
| C | 2.570447000  | -4.026546000 | -1.891755000 | C | -1.686833000 | -5.032065000 | -0.349342000 |
| C | 1.932874000  | -1.666545000 | -2.580374000 | C | -0.563274000 | -5.793052000 | -0.010151000 |
| H | 3.909393000  | -2.319883000 | -2.048352000 | C | 0.104955000  | -6.552496000 | -0.973032000 |
| C | 2.549719000  | -4.457022000 | -3.362574000 | C | -0.337704000 | -6.552016000 | -2.296057000 |
| H | 1.592301000  | -4.224358000 | -1.437533000 | C | -1.452395000 | -5.785657000 | -2.648080000 |
| H | 3.300689000  | -4.617757000 | -1.321835000 | C | -2.120912000 | -5.033817000 | -1.682971000 |
| C | 1.921484000  | -2.108773000 | -4.047899000 | H | -0.481469000 | 0.261863000  | -2.704658000 |
| H | 0.921860000  | -1.750257000 | -2.168592000 | H | -1.100933000 | 2.004890000  | -4.353505000 |
| H | 2.226421000  | -0.616226000 | -2.487387000 | H | -3.495125000 | 2.555959000  | -4.738131000 |
| C | 1.574201000  | -3.597424000 | -4.175394000 | H | -5.264371000 | 1.327624000  | -3.490406000 |
| H | 2.270584000  | -5.514406000 | -3.424709000 | H | -4.631605000 | -0.440707000 | -1.865217000 |
| H | 3.559617000  | -4.367139000 | -3.790279000 | H | -3.455299000 | -4.363491000 | 0.706832000  |

|   |              |              |              |               |              |              |              |
|---|--------------|--------------|--------------|---------------|--------------|--------------|--------------|
| H | -1.987661000 | -4.382739000 | 1.680559000  | H             | -6.627653000 | -4.555701000 | 4.137777000  |
| H | -0.206146000 | -5.781250000 | 1.015986000  | <b>TS5-SR</b> |              |              |              |
| H | 0.973171000  | -7.141661000 | -0.688951000 | N             | -3.146419000 | -3.388200000 | 0.748175000  |
| H | 0.177053000  | -7.145684000 | -3.046650000 | N             | -1.680067000 | -1.603134000 | 1.180344000  |
| H | -1.804961000 | -5.779073000 | -3.676093000 | N             | -2.423326000 | -2.003351000 | -0.977757000 |
| H | -2.978062000 | -4.426463000 | -1.958193000 | C             | -2.410508000 | -2.314970000 | 0.318591000  |
| C | -2.701626000 | -1.554116000 | 2.003147000  | C             | -2.868991000 | -2.891653000 | -2.060106000 |
| C | -2.904603000 | -0.204962000 | 1.544753000  | H             | -2.759514000 | -3.934783000 | -1.761950000 |
| C | -1.774967000 | 0.670826000  | 1.489227000  | H             | -3.920944000 | -2.688927000 | -2.297550000 |
| O | -0.615159000 | 0.310159000  | 1.841697000  | C             | -1.959442000 | -2.474940000 | -3.215783000 |
| C | -4.135483000 | 0.254259000  | 1.032601000  | C             | -1.866214000 | -0.954090000 | -3.036714000 |
| C | -5.154504000 | 0.713373000  | 0.545855000  | H             | -2.749895000 | -0.469671000 | -3.464558000 |
| C | -6.269526000 | 1.302799000  | -0.099340000 | H             | -0.974519000 | -0.506316000 | -3.476796000 |
| C | -7.529935000 | 0.672028000  | -0.118238000 | C             | -1.847193000 | -0.758600000 | -1.503452000 |
| C | -6.119918000 | 2.539000000  | -0.766142000 | H             | -0.815385000 | -0.639820000 | -1.177301000 |
| C | -8.601691000 | 1.256636000  | -0.786679000 | H             | -2.366942000 | -2.769157000 | -4.186924000 |
| H | -7.650489000 | -0.276539000 | 0.396270000  | O             | -3.901903000 | 0.331499000  | -0.847698000 |
| C | -7.199476000 | 3.115101000  | -1.427292000 | C             | -2.697973000 | 0.448172000  | -1.082389000 |
| H | -5.147967000 | 3.021466000  | -0.759793000 | N             | -1.987478000 | 1.591580000  | -1.073225000 |
| C | -8.444449000 | 2.478941000  | -1.444472000 | C             | -2.536314000 | 2.901186000  | -0.907045000 |
| H | -9.566310000 | 0.755860000  | -0.794121000 | C             | -2.871070000 | 3.375309000  | 0.371762000  |
| H | -7.068827000 | 4.066600000  | -1.936548000 | C             | -3.307768000 | 4.697340000  | 0.487197000  |
| H | -9.283722000 | 2.932065000  | -1.964549000 | H             | -3.560803000 | 5.079170000  | 1.471497000  |
| C | -1.958897000 | 2.055462000  | 0.938243000  | C             | -3.406182000 | 5.545155000  | -0.616795000 |
| C | -1.201150000 | 2.444853000  | -0.170573000 | C             | -3.084438000 | 5.034371000  | -1.875804000 |
| C | -2.866213000 | 2.964406000  | 1.496852000  | H             | -3.166675000 | 5.687434000  | -2.739485000 |
| C | -1.355177000 | 3.712125000  | -0.728233000 | C             | -2.649571000 | 3.719165000  | -2.046296000 |
| H | -0.507554000 | 1.737189000  | -0.607557000 | H             | -1.008146000 | 1.513944000  | -1.398754000 |
| C | -3.007524000 | 4.240307000  | 0.953191000  | C             | -2.794160000 | 2.482977000  | 1.598896000  |
| H | -3.465431000 | 2.664992000  | 2.350130000  | C             | -4.194689000 | 1.948247000  | 1.953899000  |
| C | -2.255855000 | 4.614548000  | -0.164815000 | H             | -2.161240000 | 1.629964000  | 1.335968000  |
| H | -0.758709000 | 3.997436000  | -1.588571000 | H             | -4.856592000 | 2.773983000  | 2.242770000  |
| H | -3.710326000 | 4.940029000  | 1.397274000  | H             | -4.632935000 | 1.428730000  | 1.099238000  |
| H | -2.374526000 | 5.606140000  | -0.593422000 | H             | -4.141378000 | 1.252259000  | 2.801575000  |
| H | -0.403302000 | 4.076747000  | 4.525749000  | C             | -2.347702000 | 3.149903000  | -3.424994000 |
| H | 5.072114000  | -3.045687000 | -0.501445000 | C             | -3.587815000 | 2.403299000  | -3.955943000 |
| H | -1.766286000 | -1.665470000 | 2.547959000  | H             | -1.540385000 | 2.418612000  | -3.314227000 |
| C | -3.808861000 | -2.364489000 | 2.562011000  | H             | -4.404409000 | 3.110999000  | -4.142951000 |
| C | -3.609309000 | -3.028263000 | 3.782248000  | H             | -3.359659000 | 1.890789000  | -4.898651000 |
| C | -5.042617000 | -2.526164000 | 1.907119000  | H             | -3.951388000 | 1.667026000  | -3.232996000 |
| C | -4.616431000 | -3.806105000 | 4.352064000  | H             | -0.978309000 | -2.943890000 | -3.093442000 |
| H | -2.654918000 | -2.919650000 | 4.291782000  | C             | -1.871110000 | 4.195520000  | -4.440292000 |
| C | -6.044934000 | -3.309197000 | 2.473598000  | H             | -1.019976000 | 4.769606000  | -4.057956000 |
| H | -5.191670000 | -2.058878000 | 0.942618000  | H             | -1.558110000 | 3.700816000  | -5.366248000 |
| C | -5.841075000 | -3.947427000 | 3.699761000  | H             | -2.665402000 | 4.903812000  | -4.702510000 |
| H | -4.442384000 | -4.303156000 | 5.302654000  | C             | -2.152854000 | 3.179803000  | 2.807414000  |
| H | -6.990465000 | -3.428006000 | 1.950967000  | H             | -2.023405000 | 2.466858000  | 3.630235000  |

|   |              |              |              |   |              |              |              |
|---|--------------|--------------|--------------|---|--------------|--------------|--------------|
| H | -1.173891000 | 3.590203000  | 2.549593000  | O | 0.920508000  | -0.566241000 | 0.719454000  |
| H | -2.779353000 | 3.995774000  | 3.185686000  | O | 0.658577000  | -2.512725000 | -0.442279000 |
| C | -3.815324000 | 6.998531000  | -0.453214000 | N | 2.791373000  | -3.046360000 | -0.925588000 |
| C | -2.740339000 | 7.784319000  | 0.318284000  | C | 1.446471000  | -1.486153000 | 0.103926000  |
| C | -5.191836000 | 7.142838000  | 0.214961000  | C | 2.809256000  | -1.770351000 | -0.311415000 |
| H | -3.886750000 | 7.433014000  | -1.459442000 | C | 1.556447000  | -3.404384000 | -1.012334000 |
| H | -1.767763000 | 7.710752000  | -0.180392000 | C | 1.011786000  | -4.617765000 | -1.598844000 |
| H | -3.008919000 | 8.844558000  | 0.395929000  | C | -0.268605000 | -5.079196000 | -1.252276000 |
| H | -2.623521000 | 7.389903000  | 1.334404000  | C | -0.764816000 | -6.250561000 | -1.818630000 |
| H | -5.179180000 | 6.749298000  | 1.237872000  | C | 0.006835000  | -6.972353000 | -2.731791000 |
| H | -5.488613000 | 8.196888000  | 0.267995000  | C | 1.286673000  | -6.521021000 | -3.069272000 |
| H | -5.959103000 | 6.596007000  | -0.343186000 | C | 1.791247000  | -5.352920000 | -2.507761000 |
| C | -1.613521000 | -1.829670000 | 2.629378000  | C | 3.954493000  | -1.468607000 | 0.630317000  |
| C | -0.558131000 | -2.890392000 | 2.989974000  | C | 3.721190000  | -2.060810000 | 2.005406000  |
| C | -1.317679000 | -0.501287000 | 3.332801000  | C | 3.557463000  | -3.442432000 | 2.181978000  |
| H | -2.605513000 | -2.165324000 | 2.959784000  | C | 3.312020000  | -3.973319000 | 3.447957000  |
| C | -0.475782000 | -3.089228000 | 4.508803000  | C | 3.234048000  | -3.131963000 | 4.560660000  |
| H | 0.413402000  | -2.554417000 | 2.610512000  | C | 3.395784000  | -1.755752000 | 4.394374000  |
| H | -0.779727000 | -3.840154000 | 2.484014000  | C | 3.628383000  | -1.225600000 | 3.124149000  |
| C | -1.241178000 | -0.697508000 | 4.851729000  | H | -0.858001000 | -4.528382000 | -0.528303000 |
| H | -0.365977000 | -0.108424000 | 2.954166000  | H | -1.753485000 | -6.605247000 | -1.539477000 |
| H | -2.095981000 | 0.220134000  | 3.073289000  | H | -0.383538000 | -7.883920000 | -3.174874000 |
| C | -0.203005000 | -1.761642000 | 5.227251000  | H | 1.890938000  | -7.081939000 | -3.776433000 |
| H | 0.314683000  | -3.812191000 | 4.736302000  | H | 2.781232000  | -4.986319000 | -2.759007000 |
| H | -1.420317000 | -3.518767000 | 4.876122000  | H | 4.083079000  | -0.388947000 | 0.720542000  |
| H | -1.001959000 | 0.258569000  | 5.331829000  | H | 4.865480000  | -1.873419000 | 0.178134000  |
| H | -2.230222000 | -0.997648000 | 5.228985000  | H | 3.622021000  | -4.096546000 | 1.317316000  |
| H | -0.190600000 | -1.915485000 | 6.313174000  | H | 3.191312000  | -5.046863000 | 3.568293000  |
| H | 0.795142000  | -1.408593000 | 4.942375000  | H | 3.052675000  | -3.545765000 | 5.548911000  |
| C | -4.605892000 | -3.474180000 | 0.493920000  | H | 3.341794000  | -1.093094000 | 5.254116000  |
| C | -5.148132000 | -4.702275000 | 1.228373000  | H | 3.745928000  | -0.152857000 | 2.994524000  |
| C | -5.340448000 | -2.192577000 | 0.910598000  | C | 2.978474000  | -0.410445000 | -1.825818000 |
| H | -4.755152000 | -3.631123000 | -0.578295000 | C | 2.788558000  | 0.901956000  | -1.269601000 |
| C | -6.660901000 | -4.844494000 | 1.010174000  | C | 1.481359000  | 1.480642000  | -1.375859000 |
| H | -4.947518000 | -4.589012000 | 2.305460000  | O | 0.553177000  | 0.977479000  | -2.074959000 |
| H | -4.617058000 | -5.601785000 | 0.894066000  | C | 3.785598000  | 1.621859000  | -0.578697000 |
| C | -6.850957000 | -2.339107000 | 0.686992000  | C | 4.589539000  | 2.289436000  | 0.052289000  |
| H | -5.142316000 | -2.008758000 | 1.977535000  | C | 5.450050000  | 3.093036000  | 0.840073000  |
| H | -4.945960000 | -1.337722000 | 0.351061000  | C | 6.748225000  | 2.662671000  | 1.184774000  |
| C | -7.410939000 | -3.567972000 | 1.415184000  | C | 5.006130000  | 4.348289000  | 1.310945000  |
| H | -7.035044000 | -5.707662000 | 1.572607000  | C | 7.571243000  | 3.462180000  | 1.971562000  |
| H | -6.850844000 | -5.056060000 | -0.051712000 | H | 7.095314000  | 1.696926000  | 0.829616000  |
| H | -7.362026000 | -1.427884000 | 1.016753000  | C | 5.837449000  | 5.137388000  | 2.098620000  |
| H | -7.047925000 | -2.432163000 | -0.390796000 | H | 4.006226000  | 4.681051000  | 1.050893000  |
| H | -8.481912000 | -3.680768000 | 1.209347000  | C | 7.122857000  | 4.702252000  | 2.433069000  |
| H | -7.312342000 | -3.421099000 | 2.500508000  | H | 8.569036000  | 3.115448000  | 2.227409000  |
| H | -0.875623000 | -1.072888000 | 0.823093000  | H | 5.481058000  | 6.100940000  | 2.453679000  |

|               |              |              |              |   |              |              |              |
|---------------|--------------|--------------|--------------|---|--------------|--------------|--------------|
| H             | 7.768773000  | 5.323436000  | 3.047063000  | C | 2.750296000  | -2.046809000 | 4.783220000  |
| C             | 1.189784000  | 2.771663000  | -0.669604000 | C | 1.933791000  | -2.869071000 | 4.007764000  |
| C             | 1.394367000  | 2.914153000  | 0.709039000  | H | 1.573104000  | -3.801986000 | 4.434014000  |
| C             | 0.640761000  | 3.835852000  | -1.392906000 | C | 1.569458000  | -2.537402000 | 2.699402000  |
| C             | 1.072918000  | 4.112946000  | 1.342869000  | H | 0.633486000  | -0.868139000 | 0.670145000  |
| H             | 1.795558000  | 2.079638000  | 1.272463000  | C | 3.290431000  | 0.894988000  | 2.403332000  |
| C             | 0.323323000  | 5.036240000  | -0.759620000 | C | 4.815805000  | 0.944650000  | 2.223849000  |
| H             | 0.471366000  | 3.714841000  | -2.457956000 | H | 2.832855000  | 1.027241000  | 1.421097000  |
| C             | 0.537914000  | 5.177446000  | 0.610514000  | H | 5.330636000  | 0.842808000  | 3.186708000  |
| H             | 1.236272000  | 4.216436000  | 2.412305000  | H | 5.141078000  | 0.135852000  | 1.565503000  |
| H             | -0.111130000 | 5.850053000  | -1.331571000 | H | 5.122345000  | 1.903049000  | 1.784594000  |
| H             | 0.278887000  | 6.107388000  | 1.108879000  | C | 0.680560000  | -3.481475000 | 1.903339000  |
| H             | -2.912306000 | -3.665029000 | 1.693042000  | C | 1.311952000  | -4.877120000 | 1.768631000  |
| H             | 2.088709000  | -0.724136000 | -2.367658000 | H | 0.577642000  | -3.078319000 | 0.894725000  |
| C             | 4.217968000  | -0.895576000 | -2.479272000 | H | 1.427044000  | -5.365185000 | 2.743031000  |
| C             | 5.506413000  | -0.432820000 | -2.167644000 | H | 0.676578000  | -5.523354000 | 1.150927000  |
| C             | 4.091381000  | -1.888765000 | -3.466820000 | H | 2.303052000  | -4.819862000 | 1.304450000  |
| C             | 6.623706000  | -0.949380000 | -2.822373000 | H | 0.922817000  | -1.988852000 | -4.068276000 |
| H             | 5.629056000  | 0.341303000  | -1.421860000 | C | -0.731585000 | -3.559251000 | 2.507539000  |
| C             | 5.205963000  | -2.402909000 | -4.121150000 | H | -1.184901000 | -2.567979000 | 2.583065000  |
| H             | 3.100393000  | -2.256136000 | -3.717301000 | H | -1.385053000 | -4.181289000 | 1.885756000  |
| C             | 6.481835000  | -1.936101000 | -3.798205000 | H | -0.710631000 | -3.995715000 | 3.512879000  |
| H             | 7.611291000  | -0.573508000 | -2.568661000 | C | 2.792294000  | 2.040260000  | 3.299733000  |
| H             | 5.080097000  | -3.165422000 | -4.885291000 | H | 3.040992000  | 3.012742000  | 2.858701000  |
| H             | 7.355828000  | -2.334630000 | -4.306096000 | H | 1.706332000  | 1.992247000  | 3.425495000  |
| <b>TS5-RS</b> |              |              |              | H | 3.248624000  | 1.999313000  | 4.295294000  |
| N             | 4.260019000  | 1.107865000  | -3.197148000 | C | 3.136422000  | -2.444187000 | 6.197370000  |
| N             | 2.386307000  | 1.838139000  | -1.949894000 | C | 2.588820000  | -1.446873000 | 7.232070000  |
| N             | 2.591494000  | -0.376356000 | -2.620926000 | C | 4.658296000  | -2.610399000 | 6.341581000  |
| C             | 3.064899000  | 0.875899000  | -2.567864000 | H | 2.674250000  | -3.419865000 | 6.398852000  |
| C             | 2.949139000  | -1.329767000 | -3.684022000 | H | 1.501530000  | -1.348980000 | 7.146162000  |
| H             | 3.005216000  | -0.809871000 | -4.642648000 | H | 2.827002000  | -1.773306000 | 8.251279000  |
| H             | 3.920855000  | -1.799643000 | -3.487729000 | H | 3.025818000  | -0.451755000 | 7.088673000  |
| C             | 1.827194000  | -2.360703000 | -3.574350000 | H | 5.176450000  | -1.660833000 | 6.163754000  |
| C             | 1.611428000  | -2.447634000 | -2.060373000 | H | 4.918595000  | -2.949536000 | 7.351192000  |
| H             | 2.397277000  | -3.061735000 | -1.605915000 | H | 5.044083000  | -3.340208000 | 5.621974000  |
| H             | 0.644222000  | -2.853762000 | -1.783532000 | C | 2.925818000  | 3.172941000  | -1.659418000 |
| C             | 1.751717000  | -0.985827000 | -1.575880000 | C | 2.332122000  | 4.223723000  | -2.607627000 |
| H             | 0.779535000  | -0.490639000 | -1.529775000 | C | 2.707672000  | 3.551374000  | -0.192834000 |
| H             | 2.096657000  | -3.320392000 | -4.023543000 | H | 4.008344000  | 3.129865000  | -1.817595000 |
| O             | 3.709163000  | -0.998239000 | -0.168576000 | C | 2.927719000  | 5.608533000  | -2.318733000 |
| C             | 2.479331000  | -0.954567000 | -0.224547000 | H | 1.244562000  | 4.242275000  | -2.466818000 |
| N             | 1.641901000  | -0.966973000 | 0.837064000  | H | 2.514064000  | 3.930054000  | -3.649878000 |
| C             | 2.035212000  | -1.319889000 | 2.168498000  | C | 3.292881000  | 4.939106000  | 0.100475000  |
| C             | 2.837063000  | -0.453573000 | 2.932402000  | H | 1.639336000  | 3.540313000  | 0.032410000  |
| C             | 3.191990000  | -0.845148000 | 4.224484000  | H | 3.179636000  | 2.797270000  | 0.441350000  |
| H             | 3.819779000  | -0.183452000 | 4.815152000  | C | 2.735518000  | 6.006907000  | -0.849428000 |

|   |              |              |              |   |              |              |              |
|---|--------------|--------------|--------------|---|--------------|--------------|--------------|
| H | 2.472412000  | 6.354162000  | -2.980985000 | H | -4.168073000 | 0.259779000  | 0.681217000  |
| H | 4.002438000  | 5.595022000  | -2.555713000 | H | -5.271067000 | -0.913451000 | -0.046653000 |
| H | 3.078331000  | 5.208105000  | 1.141079000  | H | -5.092014000 | -3.382006000 | 0.898099000  |
| H | 4.388385000  | 4.899857000  | 0.003910000  | H | -4.921675000 | -4.704197000 | 2.992101000  |
| H | 3.215313000  | 6.973924000  | -0.655632000 | H | -3.988243000 | -3.663032000 | 5.049052000  |
| H | 1.665537000  | 6.133388000  | -0.649476000 | H | -3.242870000 | -1.290528000 | 4.998100000  |
| C | 5.461547000  | 0.392508000  | -2.692560000 | H | -3.420522000 | 0.020557000  | 2.898500000  |
| C | 6.486810000  | 0.205171000  | -3.809099000 | C | -2.988983000 | 0.222519000  | -1.928262000 |
| C | 6.060893000  | 1.119155000  | -1.481562000 | C | -2.635580000 | 1.425170000  | -1.235747000 |
| H | 5.113946000  | -0.579145000 | -2.336987000 | C | -1.257134000 | 1.791457000  | -1.147347000 |
| C | 7.727197000  | -0.534356000 | -3.285075000 | O | -0.320528000 | 1.240063000  | -1.794752000 |
| H | 6.783523000  | 1.192352000  | -4.194918000 | C | -3.551730000 | 2.244841000  | -0.535524000 |
| H | 6.029349000  | -0.337616000 | -4.644484000 | C | -4.254985000 | 3.004213000  | 0.109799000  |
| C | 7.293178000  | 0.371454000  | -0.958210000 | C | -5.018755000 | 3.899114000  | 0.900081000  |
| H | 6.346074000  | 2.141548000  | -1.776330000 | C | -6.420797000 | 3.784083000  | 0.993654000  |
| H | 5.301493000  | 1.192591000  | -0.697420000 | C | -4.373785000 | 4.927882000  | 1.620389000  |
| C | 8.335895000  | 0.173619000  | -2.066453000 | C | -7.150419000 | 4.670246000  | 1.779937000  |
| H | 8.470039000  | -0.629342000 | -4.085634000 | H | -6.922941000 | 2.992127000  | 0.446277000  |
| H | 7.438657000  | -1.556364000 | -3.000826000 | C | -5.114082000 | 5.807586000  | 2.402863000  |
| H | 7.726896000  | 0.915399000  | -0.111239000 | H | -3.294170000 | 5.015804000  | 1.554915000  |
| H | 6.971035000  | -0.605117000 | -0.572315000 | C | -6.503771000 | 5.686242000  | 2.487714000  |
| H | 9.190794000  | -0.398711000 | -1.687347000 | H | -8.230480000 | 4.566882000  | 1.842245000  |
| H | 8.725909000  | 1.154216000  | -2.376384000 | H | -4.603354000 | 6.593845000  | 2.952910000  |
| O | -1.173306000 | -0.573693000 | 0.688166000  | H | -7.077119000 | 6.375589000  | 3.101026000  |
| O | -1.271077000 | -2.438191000 | -0.637628000 | H | 1.365727000  | 1.682094000  | -1.779487000 |
| N | -3.457721000 | -2.485842000 | -1.169197000 | C | -0.927025000 | 2.941763000  | -0.233068000 |
| C | -1.847307000 | -1.318874000 | -0.010850000 | C | -0.587134000 | 2.687387000  | 1.101128000  |
| C | -3.225930000 | -1.294356000 | -0.453768000 | C | -0.991058000 | 4.261516000  | -0.690734000 |
| C | -2.319650000 | -3.083958000 | -1.278707000 | C | -0.305070000 | 3.748014000  | 1.962810000  |
| C | -2.031443000 | -4.326760000 | -1.975918000 | H | -0.572564000 | 1.661227000  | 1.453206000  |
| C | -0.871105000 | -5.070019000 | -1.705269000 | C | -0.714271000 | 5.320463000  | 0.174652000  |
| C | -0.631067000 | -6.261397000 | -2.385763000 | H | -1.292760000 | 4.456953000  | -1.715961000 |
| C | -1.542686000 | -6.724632000 | -3.336234000 | C | -0.364938000 | 5.065665000  | 1.502997000  |
| C | -2.704652000 | -5.992131000 | -3.599701000 | H | -0.047936000 | 3.546966000  | 2.998455000  |
| C | -2.952024000 | -4.801130000 | -2.926425000 | H | -0.785236000 | 6.343988000  | -0.183375000 |
| C | -4.313108000 | -0.800532000 | 0.470257000  | H | -0.152158000 | 5.889761000  | 2.178255000  |
| C | -4.287065000 | -1.586832000 | 1.765622000  | H | 4.440799000  | 2.086892000  | -3.385384000 |
| C | -4.702219000 | -2.924356000 | 1.803041000  | H | -2.121264000 | -0.225503000 | -2.407996000 |
| C | -4.596139000 | -3.667231000 | 2.977982000  | C | -4.234193000 | -0.012669000 | -2.685503000 |
| C | -4.072241000 | -3.083292000 | 4.133821000  | C | -5.449515000 | 0.641084000  | -2.422208000 |
| C | -3.655828000 | -1.752150000 | 4.105067000  | C | -4.203089000 | -0.961726000 | -3.723882000 |
| C | -3.760934000 | -1.010938000 | 2.927244000  | C | -6.587772000 | 0.351077000  | -3.172406000 |
| H | -0.175852000 | -4.722649000 | -0.949681000 | H | -5.496060000 | 1.381395000  | -1.634329000 |
| H | 0.266302000  | -6.833047000 | -2.166242000 | C | -5.338948000 | -1.249452000 | -4.472849000 |
| H | -1.352353000 | -7.653341000 | -3.866516000 | H | -3.271252000 | -1.478088000 | -3.935868000 |
| H | -3.417546000 | -6.351191000 | -4.336615000 | C | -6.541142000 | -0.594097000 | -4.197753000 |
| H | -3.846023000 | -4.217115000 | -3.119321000 | H | -7.517205000 | 0.869989000  | -2.953583000 |

|                |              |              |              |   |             |              |              |
|----------------|--------------|--------------|--------------|---|-------------|--------------|--------------|
| H              | -5.286930000 | -1.983567000 | -5.272561000 | H | 1.764811000 | -0.203578000 | -3.599657000 |
| H              | -7.431664000 | -0.816275000 | -4.779292000 | H | 3.295607000 | -0.208965000 | -4.484833000 |
| <b>TS5-SS'</b> |              |              |              | C | 4.426265000 | 4.457581000  | -4.294702000 |
| N              | 3.873882000  | -3.034084000 | 2.578271000  | C | 3.795989000 | 4.121422000  | -5.656713000 |
| N              | 2.002502000  | -2.618545000 | 1.190848000  | C | 5.957629000 | 4.329059000  | -4.348253000 |
| N              | 2.732862000  | -1.032282000 | 2.722006000  | H | 4.187536000 | 5.505219000  | -4.067466000 |
| C              | 2.856894000  | -2.227506000 | 2.131257000  | H | 2.707654000 | 4.238720000  | -5.625538000 |
| C              | 3.256783000  | -0.721220000 | 4.060180000  | H | 4.191859000 | 4.776687000  | -6.441622000 |
| H              | 3.185785000  | -1.602661000 | 4.700432000  | H | 4.012001000 | 3.085991000  | -5.945074000 |
| H              | 4.308252000  | -0.411260000 | 4.010652000  | H | 6.257851000 | 3.301516000  | -4.584620000 |
| C              | 2.375957000  | 0.456568000  | 4.477385000  | H | 6.376831000 | 4.986010000  | -5.119534000 |
| C              | 2.227359000  | 1.240195000  | 3.167040000  | H | 6.408265000 | 4.594620000  | -3.386142000 |
| H              | 3.125796000  | 1.842616000  | 2.990546000  | C | 2.147441000 | -3.785998000 | 0.309647000  |
| H              | 1.356320000  | 1.893231000  | 3.132769000  | C | 0.896103000 | -4.669059000 | 0.409705000  |
| C              | 2.113160000  | 0.139629000  | 2.083573000  | C | 2.417848000 | -3.343845000 | -1.132328000 |
| H              | 1.067393000  | -0.052135000 | 1.844374000  | H | 3.010872000 | -4.370886000 | 0.643924000  |
| H              | 2.825945000  | 1.045460000  | 5.281557000  | C | 0.999318000 | -5.874891000 | -0.532740000 |
| O              | 4.092557000  | 0.205165000  | 0.703217000  | H | 0.021234000 | -4.068282000 | 0.138203000  |
| C              | 2.911234000  | 0.528119000  | 0.827296000  | H | 0.757273000 | -4.991416000 | 1.448920000  |
| N              | 2.191511000  | 1.275181000  | -0.045301000 | C | 2.505444000 | -4.549879000 | -2.075256000 |
| C              | 2.747989000  | 2.047115000  | -1.113080000 | H | 1.605277000 | -2.684922000 | -1.451449000 |
| C              | 3.424215000  | 1.419458000  | -2.176110000 | H | 3.342060000 | -2.759935000 | -1.160938000 |
| C              | 3.970803000  | 2.220768000  | -3.180800000 | C | 1.254731000 | -5.432444000 | -1.978991000 |
| H              | 4.502375000  | 1.739041000  | -3.997036000 | H | 0.078691000 | -6.466353000 | -0.470859000 |
| C              | 3.834071000  | 3.609619000  | -3.182608000 | H | 1.817753000 | -6.530965000 | -0.199552000 |
| C              | 3.117655000  | 4.195100000  | -2.139681000 | H | 2.646868000 | -4.197561000 | -3.103890000 |
| H              | 2.980946000  | 5.273150000  | -2.140986000 | H | 3.395806000 | -5.145817000 | -1.823541000 |
| C              | 2.572411000  | 3.446571000  | -1.092782000 | H | 1.360666000 | -6.309805000 | -2.628610000 |
| H              | 1.242241000  | 1.506908000  | 0.266770000  | H | 0.387029000 | -4.868862000 | -2.340982000 |
| C              | 3.519459000  | -0.091397000 | -2.307314000 | C | 5.270496000 | -2.562982000 | 2.383408000  |
| C              | 4.977867000  | -0.573442000 | -2.278441000 | C | 6.202647000 | -3.261721000 | 3.371644000  |
| H              | 3.005035000  | -0.535618000 | -1.455379000 | C | 5.724342000 | -2.757131000 | 0.930815000  |
| H              | 5.545340000  | -0.173936000 | -3.127170000 | H | 5.267943000 | -1.488823000 | 2.576398000  |
| H              | 5.458827000  | -0.250889000 | -1.352414000 | C | 7.651409000 | -2.789714000 | 3.179104000  |
| H              | 5.025622000  | -1.668331000 | -2.338197000 | H | 6.147605000 | -4.349150000 | 3.209460000  |
| C              | 1.752595000  | 4.147898000  | -0.018495000 | H | 5.861230000 | -3.075887000 | 4.396653000  |
| C              | 2.451951000  | 5.385989000  | 0.562702000  | C | 7.169728000 | -2.279874000 | 0.744801000  |
| H              | 1.596788000  | 3.456547000  | 0.811261000  | H | 5.648746000 | -3.823853000 | 0.667240000  |
| H              | 2.576854000  | 6.177633000  | -0.184710000 | H | 5.055007000 | -2.196188000 | 0.273193000  |
| H              | 1.847747000  | 5.798564000  | 1.378438000  | C | 8.119152000 | -2.975807000 | 1.728838000  |
| H              | 3.443585000  | 5.135953000  | 0.956313000  | H | 8.312319000 | -3.327193000 | 3.869018000  |
| H              | 1.400986000  | 0.091524000  | 4.819746000  | H | 7.717937000 | -1.725185000 | 3.445460000  |
| C              | 0.361571000  | 4.511393000  | -0.571273000 | H | 7.488071000 | -2.453618000 | -0.289482000 |
| H              | -0.143136000 | 3.630986000  | -0.979094000 | H | 7.202851000 | -1.193360000 | 0.903547000  |
| H              | 0.448957000  | 5.251132000  | -1.376699000 | H | 9.139360000 | -2.592027000 | 1.610534000  |
| C              | 2.796749000  | -0.569710000 | -3.578257000 | H | 8.157935000 | -4.050283000 | 1.497118000  |
| H              | 2.774676000  | -1.665092000 | -3.621248000 | H | 1.136887000 | -2.065294000 | 1.025794000  |

|   |              |              |              |                |              |              |              |
|---|--------------|--------------|--------------|----------------|--------------|--------------|--------------|
| O | -0.170938000 | 1.906116000  | 1.368694000  | H              | -9.394457000 | -3.026072000 | -2.903876000 |
| O | -1.477379000 | 1.413544000  | -0.436657000 | C              | -1.475246000 | -2.161081000 | -1.051154000 |
| N | -3.540837000 | 1.677382000  | 0.446620000  | C              | -0.595345000 | -1.656690000 | -2.020102000 |
| C | -1.287808000 | 1.715452000  | 0.899080000  | C              | -2.297727000 | -3.247167000 | -1.380535000 |
| C | -2.612207000 | 1.725102000  | 1.493771000  | C              | -0.569899000 | -2.195575000 | -3.304732000 |
| C | -2.864894000 | 1.390233000  | -0.621226000 | H              | 0.045472000  | -0.822609000 | -1.752320000 |
| C | -3.360624000 | 1.055937000  | -1.940708000 | C              | -2.256242000 | -3.799412000 | -2.660514000 |
| C | -2.488028000 | 0.870694000  | -3.023828000 | H              | -2.970613000 | -3.656617000 | -0.637340000 |
| C | -2.989810000 | 0.480261000  | -4.261712000 | C              | -1.404396000 | -3.265916000 | -3.630487000 |
| C | -4.360748000 | 0.277404000  | -4.432758000 | H              | 0.098888000  | -1.779174000 | -4.051576000 |
| C | -5.234039000 | 0.473979000  | -3.359132000 | H              | -2.895375000 | -4.644576000 | -2.900791000 |
| C | -4.740393000 | 0.858197000  | -2.118113000 | H              | -1.386548000 | -3.686779000 | -4.631997000 |
| C | -2.866086000 | 2.566086000  | 2.718718000  | H              | -0.268945000 | 4.931749000  | 0.217176000  |
| C | -2.462436000 | 4.008875000  | 2.484115000  | H              | 3.762578000  | -4.005538000 | 2.312692000  |
| C | -1.336661000 | 4.548662000  | 3.113879000  | H              | -1.622000000 | -0.327198000 | 2.545409000  |
| C | -0.942372000 | 5.865242000  | 2.869545000  | C              | -3.699791000 | -0.273224000 | 3.121893000  |
| C | -1.668495000 | 6.658560000  | 1.980760000  | C              | -3.359387000 | -0.424438000 | 4.476100000  |
| C | -2.787712000 | 6.124387000  | 1.337215000  | C              | -5.048464000 | -0.040798000 | 2.795609000  |
| C | -3.179755000 | 4.810043000  | 1.585966000  | C              | -4.331355000 | -0.378932000 | 5.474213000  |
| H | -1.424364000 | 1.021619000  | -2.883513000 | H              | -2.318041000 | -0.591024000 | 4.741926000  |
| H | -2.307258000 | 0.325721000  | -5.092490000 | C              | -6.016780000 | 0.012303000  | 3.794331000  |
| H | -4.748193000 | -0.035928000 | -5.398345000 | H              | -5.316746000 | 0.135954000  | 1.763010000  |
| H | -6.298419000 | 0.301268000  | -3.482536000 | C              | -5.667107000 | -0.163409000 | 5.135881000  |
| H | -5.400149000 | 0.989353000  | -1.269403000 | H              | -4.044241000 | -0.507186000 | 6.514457000  |
| H | -3.927140000 | 2.491370000  | 2.972496000  | H              | -7.052426000 | 0.202079000  | 3.524598000  |
| H | -2.303496000 | 2.160458000  | 3.565801000  | H              | -6.428200000 | -0.121929000 | 5.910155000  |
| H | -0.763490000 | 3.928246000  | 3.797831000  | <b>TS5-RR'</b> |              |              |              |
| H | -0.066924000 | 6.269419000  | 3.371276000  | N              | 4.619093000  | -3.007501000 | 1.155670000  |
| H | -1.362035000 | 7.682461000  | 1.785557000  | N              | 2.588015000  | -2.314818000 | 0.211321000  |
| H | -3.354818000 | 6.733015000  | 0.638017000  | N              | 3.480625000  | -1.184203000 | 2.042910000  |
| H | -4.039137000 | 4.387349000  | 1.072727000  | C              | 3.547288000  | -2.151623000 | 1.119214000  |
| C | -2.620450000 | -0.328958000 | 2.115463000  | C              | 4.220121000  | -1.209722000 | 3.313549000  |
| C | -2.702326000 | -1.118038000 | 0.919473000  | H              | 4.420953000  | -2.242384000 | 3.606688000  |
| C | -1.471106000 | -1.494069000 | 0.289701000  | H              | 5.174362000  | -0.678106000 | 3.208167000  |
| O | -0.344680000 | -1.210727000 | 0.793273000  | C              | 3.287408000  | -0.444594000 | 4.252453000  |
| C | -3.935248000 | -1.452822000 | 0.321658000  | C              | 2.738435000  | 0.659359000  | 3.341496000  |
| C | -4.983619000 | -1.749526000 | -0.223944000 | H              | 3.474872000  | 1.464721000  | 3.246626000  |
| C | -6.163803000 | -2.100780000 | -0.924834000 | H              | 1.792939000  | 1.085981000  | 3.675357000  |
| C | -7.433905000 | -1.973937000 | -0.327039000 | C              | 2.548505000  | -0.045404000 | 1.978911000  |
| C | -6.083191000 | -2.571035000 | -2.253204000 | H              | 1.519308000  | -0.392714000 | 1.880279000  |
| C | -8.583844000 | -2.303130000 | -1.038424000 | H              | 3.811520000  | -0.057044000 | 5.130539000  |
| H | -7.499190000 | -1.616288000 | 0.696135000  | O              | 4.031433000  | 0.919250000  | 0.322747000  |
| C | -7.238883000 | -2.902924000 | -2.952239000 | C              | 2.903573000  | 0.893421000  | 0.813692000  |
| H | -5.107512000 | -2.649705000 | -2.721192000 | N              | 1.875010000  | 1.695904000  | 0.469419000  |
| C | -8.494382000 | -2.769602000 | -2.352341000 | C              | 1.929229000  | 2.753694000  | -0.487581000 |
| H | -9.556219000 | -2.196705000 | -0.564773000 | C              | 2.087158000  | 2.475437000  | -1.856834000 |
| H | -7.161303000 | -3.261364000 | -3.975536000 | C              | 2.131615000  | 3.555581000  | -2.744937000 |

|   |              |              |              |   |              |              |              |
|---|--------------|--------------|--------------|---|--------------|--------------|--------------|
| H | 2.267297000  | 3.351314000  | -3.802873000 | H | 1.916651000  | -6.553608000 | -1.566904000 |
| C | 1.998136000  | 4.877004000  | -2.317174000 | H | 3.360080000  | -5.701347000 | -2.109796000 |
| C | 1.802151000  | 5.112555000  | -0.954201000 | H | 1.442195000  | -3.140944000 | -4.178060000 |
| H | 1.686876000  | 6.137314000  | -0.615218000 | H | 3.068677000  | -3.611530000 | -3.696429000 |
| C | 1.772791000  | 4.074749000  | -0.021591000 | H | 1.637822000  | -5.635465000 | -3.894573000 |
| H | 1.016854000  | 1.584738000  | 1.014956000  | H | 0.466804000  | -4.944167000 | -2.769588000 |
| C | 2.219199000  | 1.057715000  | -2.390755000 | C | 6.015303000  | -2.513617000 | 1.081974000  |
| C | 3.656432000  | 0.807981000  | -2.882057000 | C | 6.948430000  | -3.724741000 | 1.008434000  |
| H | 2.012639000  | 0.374146000  | -1.563997000 | C | 6.233650000  | -1.560313000 | -0.101019000 |
| H | 3.897068000  | 1.461352000  | -3.729426000 | H | 6.236826000  | -1.976729000 | 2.009079000  |
| H | 4.368550000  | 0.999006000  | -2.076368000 | C | 8.415522000  | -3.279763000 | 0.928783000  |
| H | 3.778077000  | -0.228831000 | -3.220585000 | H | 6.698894000  | -4.310358000 | 0.109500000  |
| C | 1.665200000  | 4.351565000  | 1.471955000  | H | 6.783461000  | -4.376905000 | 1.874539000  |
| C | 3.076669000  | 4.364430000  | 2.091700000  | C | 7.699154000  | -1.113012000 | -0.170931000 |
| H | 1.111555000  | 3.525271000  | 1.928400000  | H | 5.967764000  | -2.089827000 | -1.028636000 |
| H | 3.650213000  | 5.218539000  | 1.712402000  | H | 5.565926000  | -0.697602000 | -0.010873000 |
| H | 3.020520000  | 4.448849000  | 3.183732000  | C | 8.650277000  | -2.314709000 | -0.241660000 |
| H | 3.632282000  | 3.456311000  | 1.838856000  | H | 9.063533000  | -4.159374000 | 0.840159000  |
| H | 2.478845000  | -1.100602000 | 4.593878000  | H | 8.689694000  | -2.782318000 | 1.869989000  |
| C | 0.911671000  | 5.642893000  | 1.812784000  | H | 7.843138000  | -0.454785000 | -1.034932000 |
| H | -0.079710000 | 5.666761000  | 1.348884000  | H | 7.935257000  | -0.512061000 | 0.719204000  |
| H | 1.462453000  | 6.534241000  | 1.491278000  | H | 9.693971000  | -1.978763000 | -0.247421000 |
| C | 1.192251000  | 0.754861000  | -3.495437000 | H | 8.486214000  | -2.849778000 | -1.188265000 |
| H | 1.314877000  | -0.273496000 | -3.853887000 | H | 1.674066000  | -1.816488000 | 0.309215000  |
| H | 0.166614000  | 0.863358000  | -3.133171000 | O | -0.205100000 | 1.347411000  | 2.361445000  |
| H | 1.316684000  | 1.417227000  | -4.359372000 | O | -1.875974000 | -0.206540000 | 2.383894000  |
| C | 2.052830000  | 6.036078000  | -3.298379000 | N | -3.504715000 | 0.888178000  | 1.259263000  |
| C | 0.791590000  | 6.083406000  | -4.176990000 | C | -1.324660000 | 0.997041000  | 1.994122000  |
| C | 3.325329000  | 6.003465000  | -4.159810000 | C | -2.320098000 | 1.627255000  | 1.134064000  |
| H | 2.077501000  | 6.960415000  | -2.705875000 | C | -3.183544000 | -0.199824000 | 1.880223000  |
| H | -0.107006000 | 6.188644000  | -3.560437000 | C | -3.991488000 | -1.385659000 | 2.089019000  |
| H | 0.830547000  | 6.929109000  | -4.873737000 | C | -3.512648000 | -2.479764000 | 2.824483000  |
| H | 0.690596000  | 5.164080000  | -4.765841000 | C | -4.282079000 | -3.634462000 | 2.935140000  |
| H | 3.342773000  | 5.122632000  | -4.811711000 | C | -5.535235000 | -3.705716000 | 2.323433000  |
| H | 3.379123000  | 6.890862000  | -4.801011000 | C | -6.021430000 | -2.611912000 | 1.601696000  |
| H | 4.223904000  | 5.974168000  | -3.534660000 | C | -5.255376000 | -1.459057000 | 1.479635000  |
| C | 2.699826000  | -3.218512000 | -0.944799000 | C | -2.363673000 | 3.131201000  | 1.028914000  |
| C | 2.215351000  | -4.639035000 | -0.607004000 | C | -2.829280000 | 3.764120000  | 2.324385000  |
| C | 1.927510000  | -2.640717000 | -2.133866000 | C | -1.930829000 | 4.025984000  | 3.366360000  |
| H | 3.759223000  | -3.254604000 | -1.232074000 | C | -2.376326000 | 4.577976000  | 4.567114000  |
| C | 2.305044000  | -5.562551000 | -1.828583000 | C | -3.729158000 | 4.871106000  | 4.746029000  |
| H | 1.179539000  | -4.576890000 | -0.262296000 | C | -4.633452000 | 4.602704000  | 3.717178000  |
| H | 2.792857000  | -5.054185000 | 0.231200000  | C | -4.184914000 | 4.051995000  | 2.517034000  |
| C | 2.024616000  | -3.565980000 | -3.352418000 | H | -2.536308000 | -2.421816000 | 3.290070000  |
| H | 0.878415000  | -2.512212000 | -1.854846000 | H | -3.898135000 | -4.483765000 | 3.493242000  |
| H | 2.322677000  | -1.650577000 | -2.364660000 | H | -6.129831000 | -4.611601000 | 2.403617000  |
| C | 1.534772000  | -4.981139000 | -3.020716000 | H | -6.986739000 | -2.669500000 | 1.108921000  |



|   |              |              |              |                |              |              |              |
|---|--------------|--------------|--------------|----------------|--------------|--------------|--------------|
| H | -5.604722000 | -0.612766000 | 0.900985000  | H              | -1.589908000 | 4.535859000  | -3.595414000 |
| H | -3.038048000 | 3.409388000  | 0.216581000  | H              | -5.401166000 | 2.679011000  | -2.877186000 |
| H | -1.364778000 | 3.492993000  | 0.760584000  | H              | -4.041401000 | 4.421606000  | -4.020099000 |
| H | -0.882541000 | 3.779051000  | 3.236829000  | <b>TS5-SR'</b> |              |              |              |
| H | -1.665351000 | 4.778979000  | 5.364503000  | N              | -2.727558000 | -4.128124000 | 0.810409000  |
| H | -4.076570000 | 5.303194000  | 5.680620000  | N              | -1.481612000 | -2.175113000 | 1.115910000  |
| H | -5.689686000 | 4.822264000  | 3.849107000  | N              | -1.527412000 | -3.166400000 | -0.958946000 |
| H | -4.889499000 | 3.832552000  | 1.719360000  | C              | -1.916830000 | -3.152233000 | 0.325090000  |
| C | -1.636710000 | 0.895398000  | -0.744087000 | C              | -1.466816000 | -4.351410000 | -1.821856000 |
| C | -1.882531000 | -0.525872000 | -0.745746000 | H              | -1.218766000 | -5.231910000 | -1.224114000 |
| C | -0.873922000 | -1.369457000 | -0.192112000 | H              | -2.430936000 | -4.509070000 | -2.321438000 |
| O | 0.233508000  | -0.907964000 | 0.224200000  | C              | -0.382517000 | -3.973619000 | -2.831763000 |
| C | -3.098577000 | -1.093327000 | -1.180083000 | C              | -0.588705000 | -2.465480000 | -3.027893000 |
| C | -4.131866000 | -1.634894000 | -1.532487000 | H              | -1.386740000 | -2.281072000 | -3.752183000 |
| C | -5.316475000 | -2.323910000 | -1.891200000 | H              | 0.315887000  | -1.948089000 | -3.353948000 |
| C | -6.343057000 | -1.687073000 | -2.617232000 | C              | -1.035851000 | -1.947704000 | -1.646168000 |
| C | -5.495093000 | -3.668872000 | -1.502016000 | H              | -0.191376000 | -1.511983000 | -1.111518000 |
| C | -7.510281000 | -2.373860000 | -2.937577000 | H              | -0.478885000 | -4.538069000 | -3.763716000 |
| H | -6.208127000 | -0.653421000 | -2.921152000 | O              | -3.231635000 | -1.293729000 | -2.384011000 |
| C | -6.662830000 | -4.347416000 | -1.833993000 | C              | -2.205461000 | -0.958083000 | -1.794155000 |
| H | -4.715332000 | -4.153294000 | -0.923801000 | N              | -1.993986000 | 0.252842000  | -1.232828000 |
| C | -7.677376000 | -3.705858000 | -2.550077000 | C              | -2.832867000 | 1.405040000  | -1.372183000 |
| H | -8.294394000 | -1.867728000 | -3.494518000 | C              | -4.107126000 | 1.453762000  | -0.773110000 |
| H | -6.787296000 | -5.382021000 | -1.524513000 | C              | -4.825869000 | 2.649589000  | -0.852953000 |
| H | -8.589881000 | -4.238363000 | -2.802867000 | H              | -5.808887000 | 2.696142000  | -0.393579000 |
| C | -1.101063000 | -2.838654000 | -0.006474000 | C              | -4.317621000 | 3.785178000  | -1.485324000 |
| C | -0.718483000 | -3.393943000 | 1.223325000  | C              | -3.060423000 | 3.695239000  | -2.080020000 |
| C | -1.626313000 | -3.682080000 | -0.994938000 | H              | -2.656325000 | 4.568929000  | -2.582474000 |
| C | -0.888280000 | -4.753440000 | 1.475626000  | C              | -2.301257000 | 2.523103000  | -2.045147000 |
| H | -0.307591000 | -2.735790000 | 1.981425000  | H              | -1.085148000 | 0.420021000  | -0.813050000 |
| C | -1.772623000 | -5.047945000 | -0.751314000 | C              | -4.737163000 | 0.271488000  | -0.053295000 |
| H | -1.916336000 | -3.269975000 | -1.953525000 | C              | -5.897234000 | -0.297730000 | -0.888839000 |
| C | -1.414591000 | -5.586610000 | 0.486736000  | H              | -3.978908000 | -0.509088000 | 0.048292000  |
| H | -0.608976000 | -5.163433000 | 2.442548000  | H              | -6.664714000 | 0.467634000  | -1.053028000 |
| H | -2.173349000 | -5.690839000 | -1.530194000 | H              | -5.528804000 | -0.641308000 | -1.857370000 |
| H | -1.544097000 | -6.648244000 | 0.677811000  | H              | -6.371969000 | -1.139220000 | -0.370804000 |
| H | 0.773228000  | 5.719523000  | 2.896297000  | C              | -0.956030000 | 2.477347000  | -2.753678000 |
| H | 4.480089000  | -3.827623000 | 0.579792000  | C              | -1.162951000 | 2.251770000  | -4.262642000 |
| H | -0.586211000 | 1.130979000  | -0.605493000 | H              | -0.391496000 | 1.619676000  | -2.386836000 |
| C | -2.334321000 | 1.836669000  | -1.643671000 | H              | -1.725953000 | 3.079949000  | -4.709433000 |
| C | -1.586692000 | 2.855497000  | -2.259541000 | H              | -0.193416000 | 2.184032000  | -4.769599000 |
| C | -3.722559000 | 1.796751000  | -1.871990000 | H              | -1.720115000 | 1.326968000  | -4.450081000 |
| C | -2.193147000 | 3.771215000  | -3.117098000 | H              | 0.600278000  | -4.173977000 | -2.404155000 |
| H | -0.521906000 | 2.928414000  | -2.065205000 | C              | -0.102384000 | 3.726091000  | -2.494147000 |
| C | -4.326610000 | 2.721747000  | -2.718899000 | H              | -0.014142000 | 3.936582000  | -1.424406000 |
| H | -4.321992000 | 1.062976000  | -1.352339000 | H              | 0.901111000  | 3.580906000  | -2.896880000 |
| C | -3.565623000 | 3.705501000  | -3.355479000 | H              | -0.523495000 | 4.615694000  | -2.976825000 |

|   |              |              |              |   |              |              |              |
|---|--------------|--------------|--------------|---|--------------|--------------|--------------|
| C | -5.220055000 | 0.643136000  | 1.359790000  | H | -7.221641000 | -4.533164000 | 0.709590000  |
| H | -5.532617000 | -0.257839000 | 1.902037000  | H | -0.509578000 | -1.809892000 | 0.974493000  |
| H | -4.436353000 | 1.136494000  | 1.941518000  | O | 1.380803000  | 0.224142000  | -1.215307000 |
| H | -6.083735000 | 1.316459000  | 1.325864000  | O | 0.236055000  | 1.624209000  | 0.194455000  |
| C | -5.096144000 | 5.088619000  | -1.506114000 | N | 1.896925000  | 2.962223000  | 0.916000000  |
| C | -5.253322000 | 5.660856000  | -0.086660000 | C | 1.417468000  | 1.139836000  | -0.410665000 |
| C | -6.460958000 | 4.930679000  | -2.195439000 | C | 2.488883000  | 1.913609000  | 0.187745000  |
| H | -4.508016000 | 5.808265000  | -2.090712000 | C | 0.626083000  | 2.723512000  | 0.945878000  |
| H | -4.279379000 | 5.784997000  | 0.397510000  | C | -0.399724000 | 3.448184000  | 1.679616000  |
| H | -5.756279000 | 6.634656000  | -0.113160000 | C | -1.764762000 | 3.191981000  | 1.479597000  |
| H | -5.854989000 | 4.991041000  | 0.539774000  | C | -2.722555000 | 3.901059000  | 2.200292000  |
| H | -7.104148000 | 4.234391000  | -1.644688000 | C | -2.331631000 | 4.871166000  | 3.125304000  |
| H | -6.981872000 | 5.893753000  | -2.248641000 | C | -0.971436000 | 5.132257000  | 3.323986000  |
| H | -6.345843000 | 4.544128000  | -3.213542000 | C | -0.008947000 | 4.428639000  | 2.608791000  |
| C | -2.046765000 | -1.769752000 | 2.405458000  | C | 3.780289000  | 2.137695000  | -0.557371000 |
| C | -1.352153000 | -2.484988000 | 3.577319000  | C | 3.581092000  | 2.903543000  | -1.847996000 |
| C | -1.887618000 | -0.246545000 | 2.530186000  | C | 3.557525000  | 4.302948000  | -1.853756000 |
| H | -3.117928000 | -2.016027000 | 2.398062000  | C | 3.364083000  | 5.006729000  | -3.042344000 |
| C | -1.860569000 | -1.970076000 | 4.930306000  | C | 3.186396000  | 4.318377000  | -4.244140000 |
| H | -0.275757000 | -2.296996000 | 3.481707000  | C | 3.193223000  | 2.922227000  | -4.246018000 |
| H | -1.491932000 | -3.573519000 | 3.502700000  | C | 3.387274000  | 2.220966000  | -3.055222000 |
| C | -2.397204000 | 0.266022000  | 3.880127000  | H | -2.074602000 | 2.454892000  | 0.752931000  |
| H | -0.825675000 | -0.005362000 | 2.414584000  | H | -3.774337000 | 3.696818000  | 2.025735000  |
| H | -2.410396000 | 0.235191000  | 1.700945000  | H | -3.080145000 | 5.422862000  | 3.687036000  |
| C | -1.696973000 | -0.448284000 | 5.042685000  | H | -0.662411000 | 5.886685000  | 4.042062000  |
| H | -1.327106000 | -2.476866000 | 5.743042000  | H | 1.050170000  | 4.616107000  | 2.751751000  |
| H | -2.924239000 | -2.228821000 | 5.043395000  | H | 4.228683000  | 1.162883000  | -0.772325000 |
| H | -2.242061000 | 1.349078000  | 3.937474000  | H | 4.463583000  | 2.677378000  | 0.103914000  |
| H | -3.481873000 | 0.099006000  | 3.953430000  | H | 3.686526000  | 4.837076000  | -0.916178000 |
| H | -2.092304000 | -0.095961000 | 6.002926000  | H | 3.351884000  | 6.093369000  | -3.030699000 |
| H | -0.626878000 | -0.199161000 | 5.027706000  | H | 3.037412000  | 4.865738000  | -5.170846000 |
| C | -3.902451000 | -4.695160000 | 0.119377000  | H | 3.049614000  | 2.377933000  | -5.175851000 |
| C | -4.644731000 | -5.599324000 | 1.108711000  | H | 3.378724000  | 1.134894000  | -3.051631000 |
| C | -4.825068000 | -3.605233000 | -0.437967000 | C | 3.010360000  | 0.537728000  | 1.693028000  |
| H | -3.551706000 | -5.322541000 | -0.706847000 | C | 3.245021000  | -0.731049000 | 1.060726000  |
| C | -5.889930000 | -6.217041000 | 0.458585000  | C | 2.091771000  | -1.559734000 | 0.895139000  |
| H | -4.951105000 | -4.995286000 | 1.976905000  | O | 0.968459000  | -1.232501000 | 1.392021000  |
| H | -3.970166000 | -6.381515000 | 1.478501000  | C | 4.501814000  | -1.151952000 | 0.578215000  |
| C | -6.067445000 | -4.222562000 | -1.090552000 | C | 5.567155000  | -1.554305000 | 0.140289000  |
| H | -5.127992000 | -2.957448000 | 0.396906000  | C | 6.762891000  | -2.074779000 | -0.414801000 |
| H | -4.289272000 | -2.974835000 | -1.153998000 | C | 7.920635000  | -1.279668000 | -0.541790000 |
| C | -6.818194000 | -5.138000000 | -0.115389000 | C | 6.808999000  | -3.412091000 | -0.864783000 |
| H | -6.420985000 | -6.833594000 | 1.192802000  | C | 9.081377000  | -1.807013000 | -1.098439000 |
| H | -5.574502000 | -6.892808000 | -0.348913000 | H | 7.892117000  | -0.248437000 | -0.203045000 |
| H | -6.722440000 | -3.424360000 | -1.456109000 | C | 7.973781000  | -3.927310000 | -1.423787000 |
| H | -5.761598000 | -4.801932000 | -1.973752000 | H | 5.920763000  | -4.028291000 | -0.765811000 |
| H | -7.676683000 | -5.605805000 | -0.611467000 | C | 9.115841000  | -3.131022000 | -1.543124000 |

|                |              |              |              |   |              |              |              |
|----------------|--------------|--------------|--------------|---|--------------|--------------|--------------|
| H              | 9.964747000  | -1.180447000 | -1.188442000 | C | -5.089694000 | 2.229657000  | -1.013509000 |
| H              | 7.993001000  | -4.958858000 | -1.765875000 | H | -6.017656000 | 2.232958000  | -0.448865000 |
| H              | 10.024100000 | -3.538280000 | -1.978030000 | C | -4.861062000 | 3.241860000  | -1.945883000 |
| C              | 2.184076000  | -2.883590000 | 0.202349000  | C | -3.653829000 | 3.222177000  | -2.641526000 |
| C              | 2.897810000  | -3.070147000 | -0.990483000 | H | -3.452182000 | 4.011974000  | -3.359273000 |
| C              | 1.519452000  | -3.980404000 | 0.770305000  | C | -2.702561000 | 2.216691000  | -2.458599000 |
| C              | 2.994499000  | -4.337734000 | -1.563525000 | H | -0.996591000 | 0.502409000  | -1.335377000 |
| H              | 3.370202000  | -2.219314000 | -1.463897000 | C | -4.494995000 | 0.204816000  | 0.335055000  |
| C              | 1.614196000  | -5.247800000 | 0.197142000  | C | -5.717056000 | -0.643940000 | -0.055819000 |
| H              | 0.952886000  | -3.831117000 | 1.683780000  | H | -3.645056000 | -0.469920000 | 0.450684000  |
| C              | 2.366584000  | -5.433946000 | -0.964643000 | H | -6.602176000 | -0.013344000 | -0.198826000 |
| H              | 3.556743000  | -4.468188000 | -2.484160000 | H | -5.516969000 | -1.187563000 | -0.980323000 |
| H              | 1.115930000  | -6.092587000 | 0.665834000  | H | -5.953191000 | -1.365650000 | 0.735370000  |
| H              | 2.452274000  | -6.422015000 | -1.408561000 | C | -1.392723000 | 2.273621000  | -3.233017000 |
| H              | -2.797060000 | -4.128168000 | 1.819566000  | C | -1.588395000 | 2.604989000  | -4.720245000 |
| H              | 2.021102000  | 0.569763000  | 2.139184000  | H | -0.909455000 | 1.295815000  | -3.193185000 |
| C              | 3.989971000  | 1.332421000  | 2.460415000  | H | -1.957298000 | 3.625473000  | -4.873075000 |
| C              | 5.379717000  | 1.308490000  | 2.251911000  | H | -0.630005000 | 2.522984000  | -5.244693000 |
| C              | 3.486438000  | 2.188665000  | 3.458498000  | H | -2.297682000 | 1.915607000  | -5.191178000 |
| C              | 6.227674000  | 2.106363000  | 3.018385000  | H | 0.901105000  | -3.832142000 | -2.758189000 |
| H              | 5.794030000  | 0.657351000  | 1.494839000  | C | -0.434290000 | 3.277671000  | -2.566322000 |
| C              | 4.333082000  | 2.983838000  | 4.222893000  | H | -0.285748000 | 3.034897000  | -1.511130000 |
| H              | 2.414167000  | 2.226075000  | 3.624186000  | H | 0.543539000  | 3.258242000  | -3.057774000 |
| C              | 5.712099000  | 2.947112000  | 4.004925000  | H | -0.839041000 | 4.295589000  | -2.619994000 |
| H              | 7.299350000  | 2.067944000  | 2.842077000  | C | -4.737634000 | 0.890173000  | 1.692674000  |
| H              | 3.917922000  | 3.632673000  | 4.989446000  | H | -4.917005000 | 0.134510000  | 2.466790000  |
| H              | 6.377582000  | 3.566843000  | 4.599721000  | H | -3.885222000 | 1.498609000  | 2.006750000  |
| <b>TS5-RS'</b> |              |              |              | H | -5.617199000 | 1.542683000  | 1.662470000  |
| N              | -2.075636000 | -4.334153000 | 0.845401000  | C | -5.880307000 | 4.341678000  | -2.189963000 |
| N              | -0.973459000 | -2.293642000 | 1.211498000  | C | -6.018196000 | 5.265696000  | -0.967926000 |
| N              | -1.037212000 | -3.222731000 | -0.909175000 | C | -7.245478000 | 3.772394000  | -2.608552000 |
| C              | -1.357711000 | -3.269579000 | 0.389800000  | H | -5.504495000 | 4.950708000  | -3.022806000 |
| C              | -0.957054000 | -4.390388000 | -1.801325000 | H | -5.053069000 | 5.707697000  | -0.700171000 |
| H              | -0.472712000 | -5.219981000 | -1.280061000 | H | -6.725557000 | 6.078061000  | -1.171942000 |
| H              | -1.954917000 | -4.712938000 | -2.120177000 | H | -6.388820000 | 4.711271000  | -0.097088000 |
| C              | -0.165582000 | -3.834360000 | -2.986065000 | H | -7.688822000 | 3.173754000  | -1.804345000 |
| C              | -0.690166000 | -2.397893000 | -3.100509000 | H | -7.946160000 | 4.581404000  | -2.845630000 |
| H              | -1.663477000 | -2.391271000 | -3.602070000 | H | -7.150176000 | 3.129000000  | -3.489461000 |
| H              | -0.011504000 | -1.722399000 | -3.618377000 | C | -1.516821000 | -2.067346000 | 2.557590000  |
| C              | -0.870883000 | -1.949711000 | -1.635019000 | C | -0.716136000 | -2.808322000 | 3.639999000  |
| H              | 0.006665000  | -1.403852000 | -1.291735000 | C | -1.549427000 | -0.566761000 | 2.863926000  |
| H              | -0.325711000 | -4.419623000 | -3.895742000 | H | -2.550588000 | -2.435899000 | 2.552751000  |
| O              | -3.251890000 | -1.695511000 | -1.585763000 | C | -1.325357000 | -2.561593000 | 5.028183000  |
| C              | -2.160347000 | -1.134306000 | -1.499832000 | H | 0.318083000  | -2.443794000 | 3.611118000  |
| N              | -1.968408000 | 0.197145000  | -1.325743000 | H | -0.676064000 | -3.885965000 | 3.426047000  |
| C              | -2.969324000 | 1.203698000  | -1.512303000 | C | -2.200829000 | -0.318255000 | 4.228221000  |
| C              | -4.162890000 | 1.213097000  | -0.759696000 | H | -0.522325000 | -0.187909000 | 2.881763000  |

|   |              |              |              |   |              |              |              |
|---|--------------|--------------|--------------|---|--------------|--------------|--------------|
| H | -2.073433000 | -0.036244000 | 2.065807000  | H | -1.096067000 | 6.985509000  | 2.105792000  |
| C | -1.447606000 | -1.062855000 | 5.337697000  | H | 0.660694000  | 5.221157000  | 1.979378000  |
| H | -0.714550000 | -3.058702000 | 5.790853000  | H | 3.978623000  | 0.420775000  | 1.369669000  |
| H | -2.322013000 | -3.026269000 | 5.072094000  | H | 4.051213000  | 1.988839000  | 2.178427000  |
| H | -2.219099000 | 0.758005000  | 4.433388000  | H | 2.378043000  | 2.268466000  | 4.235213000  |
| H | -3.249028000 | -0.649924000 | 4.199747000  | H | 1.712501000  | 1.164459000  | 6.357576000  |
| H | -1.949015000 | -0.919910000 | 6.302603000  | H | 1.962535000  | -1.297556000 | 6.612342000  |
| H | -0.442280000 | -0.635762000 | 5.431099000  | H | 2.873775000  | -2.642888000 | 4.727612000  |
| C | -3.377855000 | -4.678485000 | 0.225530000  | H | 3.534855000  | -1.524992000 | 2.612200000  |
| C | -3.523969000 | -6.191174000 | 0.054095000  | C | 2.821246000  | 1.968112000  | -0.659512000 |
| C | -4.528934000 | -4.090977000 | 1.052898000  | C | 3.234972000  | 0.728247000  | -1.255379000 |
| H | -3.397261000 | -4.181704000 | -0.747033000 | C | 2.231034000  | -0.017113000 | -1.959677000 |
| C | -4.881955000 | -6.540334000 | -0.571235000 | O | 1.062977000  | 0.400028000  | -2.182887000 |
| H | -3.437783000 | -6.670591000 | 1.040469000  | C | 4.525385000  | 0.175949000  | -1.125503000 |
| H | -2.699989000 | -6.576142000 | -0.556999000 | C | 5.614342000  | -0.370213000 | -1.042295000 |
| C | -5.885410000 | -4.440940000 | 0.427726000  | C | 6.840839000  | -1.074376000 | -0.968233000 |
| H | -4.479143000 | -4.491941000 | 2.077548000  | C | 7.912957000  | -0.607443000 | -0.179143000 |
| H | -4.406535000 | -3.004668000 | 1.115389000  | C | 7.007347000  | -2.279076000 | -1.686939000 |
| C | -6.042861000 | -5.956062000 | 0.245027000  | C | 9.105803000  | -1.320422000 | -0.113820000 |
| H | -4.983093000 | -7.628167000 | -0.659778000 | H | 7.793396000  | 0.316434000  | 0.378889000  |
| H | -4.919816000 | -6.136543000 | -1.593121000 | C | 8.203693000  | -2.984188000 | -1.611558000 |
| H | -6.694973000 | -4.040460000 | 1.048835000  | H | 6.185749000  | -2.642330000 | -2.295962000 |
| H | -5.962678000 | -3.941132000 | -0.547042000 | C | 9.259656000  | -2.511769000 | -0.827196000 |
| H | -6.998710000 | -6.181421000 | -0.242200000 | H | 9.921314000  | -0.944710000 | 0.498702000  |
| H | -6.070080000 | -6.440204000 | 1.232093000  | H | 8.315320000  | -3.909399000 | -2.171353000 |
| O | 1.159973000  | -0.558737000 | 0.705749000  | H | 10.192714000 | -3.065489000 | -0.773177000 |
| O | -0.027101000 | 1.403910000  | 0.842767000  | H | -0.216320000 | -1.657805000 | 0.914138000  |
| N | 1.573052000  | 2.799131000  | 1.608180000  | C | 2.634350000  | -1.371838000 | -2.482418000 |
| C | 1.144110000  | 0.651156000  | 0.914662000  | C | 3.020278000  | -2.389265000 | -1.599991000 |
| C | 2.200829000  | 1.593060000  | 1.226200000  | C | 2.647468000  | -1.619787000 | -3.858345000 |
| C | 0.325694000  | 2.673908000  | 1.305638000  | C | 3.440992000  | -3.625263000 | -2.090091000 |
| C | -0.714259000 | 3.684499000  | 1.371146000  | H | 3.000346000  | -2.191489000 | -0.533630000 |
| C | -2.043277000 | 3.376769000  | 1.052433000  | C | 3.076629000  | -2.853001000 | -4.351115000 |
| C | -3.025740000 | 4.359966000  | 1.122803000  | H | 2.341337000  | -0.830476000 | -4.539291000 |
| C | -2.690009000 | 5.659590000  | 1.504243000  | C | 3.482161000  | -3.856421000 | -3.468338000 |
| C | -1.361674000 | 5.973064000  | 1.814707000  | H | 3.748515000  | -4.404535000 | -1.397725000 |
| C | -0.375381000 | 4.995693000  | 1.749654000  | H | 3.102689000  | -3.028236000 | -5.423251000 |
| C | 3.413325000  | 1.119910000  | 1.991181000  | H | 3.822017000  | -4.814894000 | -3.851328000 |
| C | 3.021259000  | 0.447960000  | 3.290022000  | H | -2.063822000 | -4.441399000 | 1.852510000  |
| C | 2.491991000  | 1.194334000  | 4.351753000  | H | 1.840255000  | 2.254393000  | -1.028909000 |
| C | 2.111879000  | 0.570512000  | 5.539628000  | C | 3.690337000  | 3.151102000  | -0.450614000 |
| C | 2.250030000  | -0.812866000 | 5.683173000  | C | 5.065259000  | 3.083536000  | -0.174181000 |
| C | 2.760870000  | -1.566512000 | 4.625360000  | C | 3.087887000  | 4.420195000  | -0.517229000 |
| C | 3.139066000  | -0.938818000 | 3.436922000  | C | 5.807333000  | 4.247114000  | 0.023681000  |
| H | -2.297136000 | 2.376553000  | 0.732661000  | H | 5.553153000  | 2.119204000  | -0.128197000 |
| H | -4.047658000 | 4.104511000  | 0.867978000  | C | 3.829381000  | 5.581011000  | -0.322075000 |
| H | -3.457177000 | 6.427283000  | 1.556023000  | H | 2.023922000  | 4.487454000  | -0.723183000 |

|   |             |             |              |   |             |             |              |
|---|-------------|-------------|--------------|---|-------------|-------------|--------------|
| C | 5.196046000 | 5.499153000 | -0.047732000 | H | 3.340972000 | 6.549819000 | -0.384537000 |
| H | 6.871373000 | 4.172367000 | 0.231961000  | H | 5.779145000 | 6.403150000 | 0.106020000  |

## 9. Determination of absolute configurations of the compounds D1, E1 and G1

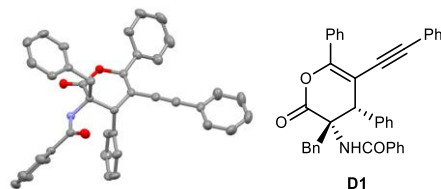

The colourless crystal in block-shape, with approximate dimensions of  $0.096 \times 0.138 \times 0.470 \text{ mm}^3$ , was selected and mounted for the single-crystal X-ray diffraction. The data set was collected by Bruker D8 Venture Photon II diffractometer at 173(2)K equipped with micro-focus Cu radiation source ( $K_{\alpha} = 1.54178 \text{ \AA}$ ). Applied with face-indexed numerical absorption correction, the structure solution was solved and refinement was processed by SHELXTL (version 6.14) and OLEX 2.3 program package<sup>13-16</sup>. The structure was analyzed by ADDSYM routine implemented in PLATON suite and no higher symmetry was suggested<sup>17</sup>. The crystal data and further details are listed in Table S12. The crystal of product **D1** was obtained in the solvents of dichloromethane and isopropanol. CCDC: 2290734.

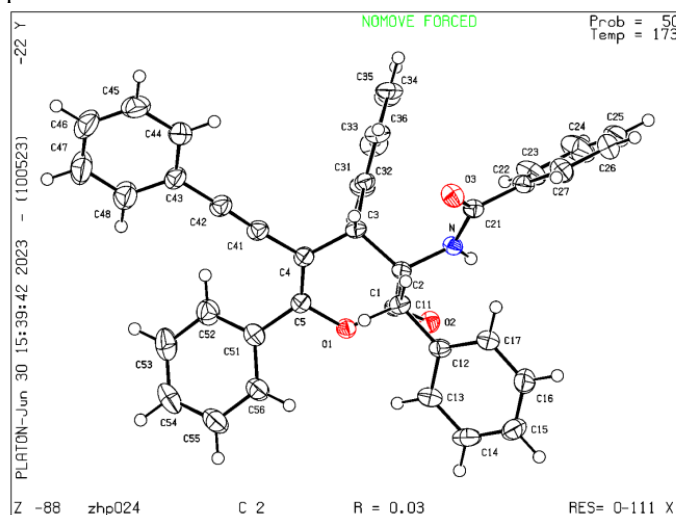

**Figure S13.** The thermal ellipsoid figure of **D1** with 50% probabilities

**Table S12** Crystallographic Data for  $\text{C}_{39}\text{H}_{29}\text{NO}_3$ .

|                                                   |                                         |
|---------------------------------------------------|-----------------------------------------|
| Formula                                           | $\text{C}_{39}\text{H}_{29}\text{NO}_3$ |
| Formula mass (amu)                                | 559.67                                  |
| Space group                                       | C 2                                     |
| $a$ (Å)                                           | 21.1267 (9)                             |
| $b$ (Å)                                           | 6.7221 (3)                              |
| $c$ (Å)                                           | 22.0658 (10)                            |
| $\alpha$ (deg)                                    | 90                                      |
| $\beta$ (deg)                                     | 100.794 (2)                             |
| $\gamma$ (deg)                                    | 90                                      |
| $V$ (Å <sup>3</sup> )                             | 3078.2 (2)                              |
| $Z$                                               | 4                                       |
| $\lambda$ (Å)                                     | 1.54178                                 |
| $T$ (K)                                           | 173                                     |
| $\rho_{\text{calc}}$ (g cm <sup>-3</sup> )        | 1.208                                   |
| $\mu$ (mm <sup>-1</sup> )                         | 0.599                                   |
| Transmission factors                              | 0.715-1.000                             |
| $\theta_{\text{max}}$ (deg)                       | 68.237                                  |
| No. of unique data, including $F_o^2 < 0$         | 5595                                    |
| No. of unique data, with $F_o^2 > 2\sigma(F_o^2)$ | 5352                                    |
| No. of variables                                  | 393                                     |
| $R(F)$ for $F_o^2 > 2\sigma(F_o^2)$ <sup>a</sup>  | 0.0310                                  |

|                 |        |
|-----------------|--------|
| $R_w(F_o^2)^b$  | 0.0752 |
| Goodness of fit | 1.054  |

$$^a R(F) = \sum ||F_o| - |F_c|| / \sum |F_o|.$$

$$^b R_w(F_o^2) = [\sum [w(F_o^2 - F_c^2)^2] / \sum wF_o^4]^{1/2}; w^{-1} = [\sigma^2(F_o^2) + (Ap)^2 + Bp], \text{ where } p = [\max(F_o^2, 0) + 2F_c^2] / 3.$$

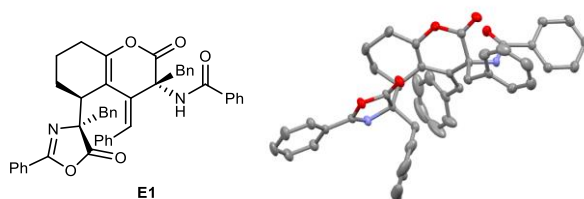

The colourless crystal in block-shape, with approximate dimensions of  $0.157 \times 0.169 \times 0.265 \text{ mm}^3$ , was selected and mounted for the single-crystal X-ray diffraction. The data set was collected by Bruker D8 Venture Photon II diffractometer at 173(2)K equipped with micro-focus Cu radiation source ( $K_\alpha = 1.54178 \text{ \AA}$ ). Applied with face-indexed numerical absorption correction, the structure solution was solved and refinement was processed by SHELXTL (version 6.14) and OLEX 2.3 program package<sup>[13], [14], [15], [16]</sup>. The structure was analyzed by ADDSYM routine implemented in PLATON suite and no higher symmetry was suggested<sup>[17]</sup>. The crystal data and further details are listed in Table S13. The crystal of product **E1** was obtained in the solvents of dichloromethane and isopropanol. CCDC: 2290736.

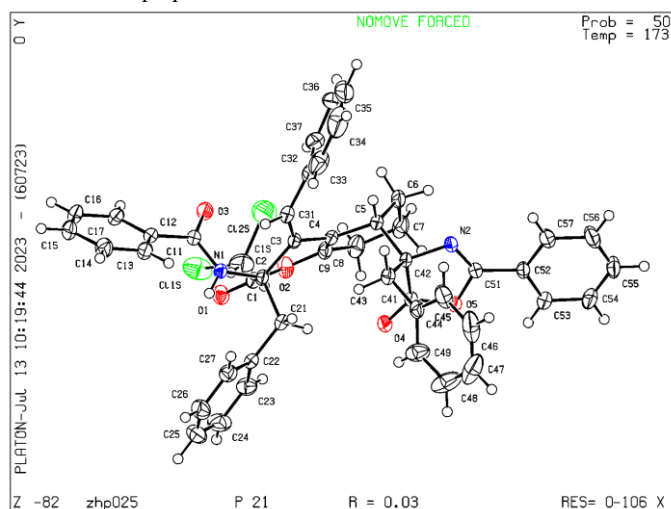

**Figure S14.** The thermal ellipsoid figure of **E1** with 50% probabilities

**Table S13** Crystallographic Data for  $\text{C}_{46}\text{H}_{38}\text{N}_2\text{O}_5$ .

|                                                   |                                                  |
|---------------------------------------------------|--------------------------------------------------|
| Formula                                           | $\text{C}_{46}\text{H}_{38}\text{N}_2\text{O}_5$ |
| Formula mass (amu)                                | 698.82                                           |
| Space group                                       | P 21                                             |
| $a$ (Å)                                           | 13.1610 (3)                                      |
| $b$ (Å)                                           | 11.3464 (2)                                      |
| $c$ (Å)                                           | 13.7532 (3)                                      |
| $\alpha$ (deg)                                    | 90                                               |
| $\beta$ (deg)                                     | 105.382 (1)                                      |
| $\gamma$ (deg)                                    | 90                                               |
| $V$ (Å <sup>3</sup> )                             | 1980.20 (7)                                      |
| Z                                                 | 2                                                |
| $\lambda$ (Å)                                     | 1.54178                                          |
| $T$ (K)                                           | 173                                              |
| $\rho_{\text{calcd}}$ (g cm <sup>-3</sup> )       | 1.314                                            |
| $\mu$ (mm <sup>-1</sup> )                         | 1.878                                            |
| Transmission factors                              | 0.840-0.965                                      |
| $\theta_{\text{max}}$ (deg)                       | 68.261                                           |
| No. of unique data, including $F_o^2 < 0$         | 7234                                             |
| No. of unique data, with $F_o^2 > 2\sigma(F_o^2)$ | 7036                                             |
| No. of variables                                  | 510                                              |
| $R(F)$ for $F_o^2 > 2\sigma(F_o^2)$ <sup>a</sup>  | 0.0275                                           |
| $R_w(F_o^2)$ <sup>b</sup>                         | 0.0655                                           |
| Goodness of fit                                   | 1.030                                            |

$$^a R(F) = \sum ||F_o| - |F_c|| / \sum |F_o|.$$

$$^b R_w(F_o^2) = [\sum [w(F_o^2 - F_c^2)^2] / \sum wF_o^4]^{1/2}; w^{-1} = [\sigma^2(F_o^2) + (Ap)^2 + Bp], \text{ where } p = [\max(F_o^2, 0) + 2F_c^2] / 3.$$

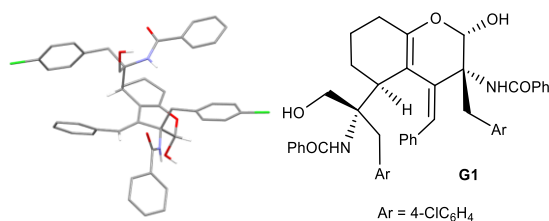

The colourless crystal in block-shape, with approximate dimensions of  $0.174 \times 0.220 \times 0.332 \text{ mm}^3$ , was selected and mounted for the single-crystal X-ray diffraction. The data set was collected by Bruker D8 Venture Photon II diffractometer at 173(2)K equipped with micro-focus Cu radiation source ( $K\alpha = 1.54178\text{\AA}$ ). Applied with face-indexed numerical absorption correction, the structure solution was solved and refinement was processed by SHELXTL (version 6.14) and OLEX 2.3 program package<sup>[13], [14], [15], [16]</sup>. The structure was analyzed by ADDSYM routine implemented in PLATON suite and no higher symmetry was suggested<sup>[17]</sup>. The crystal data and further details are listed in Table S14. The crystal of product **G1** was obtained in the solvents of tetrahydrofuran and petroleum ether. CCDC: 2310080.

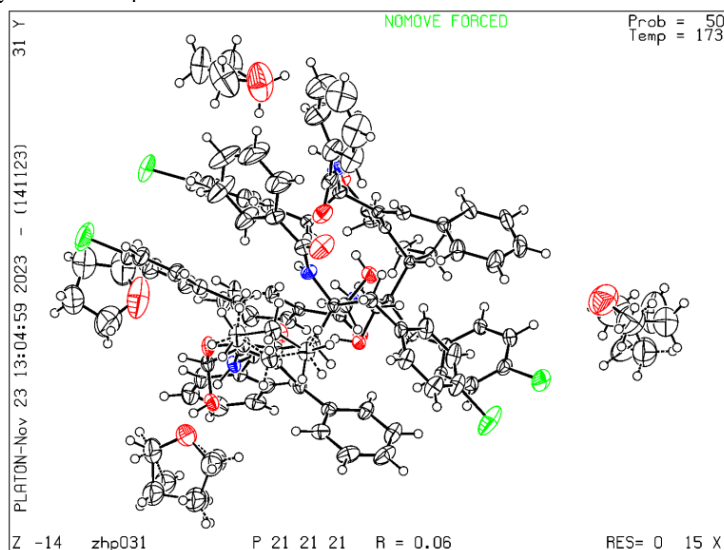

**Figure S15.** The thermal ellipsoid figure of **G1** with 50% probabilities

**Table S14** Crystallographic Data for C<sub>46</sub>H<sub>42</sub>Cl<sub>2</sub>N<sub>2</sub>O<sub>5</sub>.

|                                                   |                                                                               |
|---------------------------------------------------|-------------------------------------------------------------------------------|
| Formula                                           | C <sub>46</sub> H <sub>42</sub> Cl <sub>2</sub> N <sub>2</sub> O <sub>5</sub> |
| Formula mass (amu)                                | 773.75                                                                        |
| Space group                                       | P 21 21 21                                                                    |
| <i>a</i> (Å)                                      | 15.6884 (5)                                                                   |
| <i>b</i> (Å)                                      | 16.7218 (6)                                                                   |
| <i>c</i> (Å)                                      | 36.4564 (12)                                                                  |
| $\alpha$ (deg)                                    | 90                                                                            |
| $\beta$ (deg)                                     | 90                                                                            |
| $\gamma$ (deg)                                    | 90                                                                            |
| <i>V</i> (Å <sup>3</sup> )                        | 9563.9 (6)                                                                    |
| <i>Z</i>                                          | 4                                                                             |
| $\lambda$ (Å)                                     | 1.54178                                                                       |
| <i>T</i> (K)                                      | 173                                                                           |
| $\rho_{\text{calc}}$ (g cm <sup>-3</sup> )        | 1.275                                                                         |
| $\mu$ (mm <sup>-1</sup> )                         | 1.660                                                                         |
| Transmission factors                              | 0.655-0.869                                                                   |
| $\theta_{\text{max}}$ (deg)                       | 68.326                                                                        |
| No. of unique data, including $F_o^2 < 0$         | 17245                                                                         |
| No. of unique data, with $F_o^2 > 2\sigma(F_o^2)$ | 15873                                                                         |
| No. of variables                                  | 1225                                                                          |
| $R(F)$ for $F_o^2 > 2\sigma(F_o^2)$ <sup>a</sup>  | 0.0565                                                                        |
| $R_w(F_o^2)$ <sup>b</sup>                         | 0.1399                                                                        |
| Goodness of fit                                   | 1.041                                                                         |

<sup>a</sup>  $R(F) = \sum ||F_o| - |F_c|| / \sum |F_o|$ .

<sup>b</sup>  $R_w(F_o^2) = [\sum [w(F_o^2 - F_c^2)^2] / \sum wF_o^4]^{1/2}$ ;  $w^{-1} = [\sigma^2(F_o^2) + (Ap)^2 + Bp]$ , where  $p = [\max(F_o^2, 0) + 2F_c^2] / 3$ .

## 10. Analysis result of 2D NMR spectra of the product E3

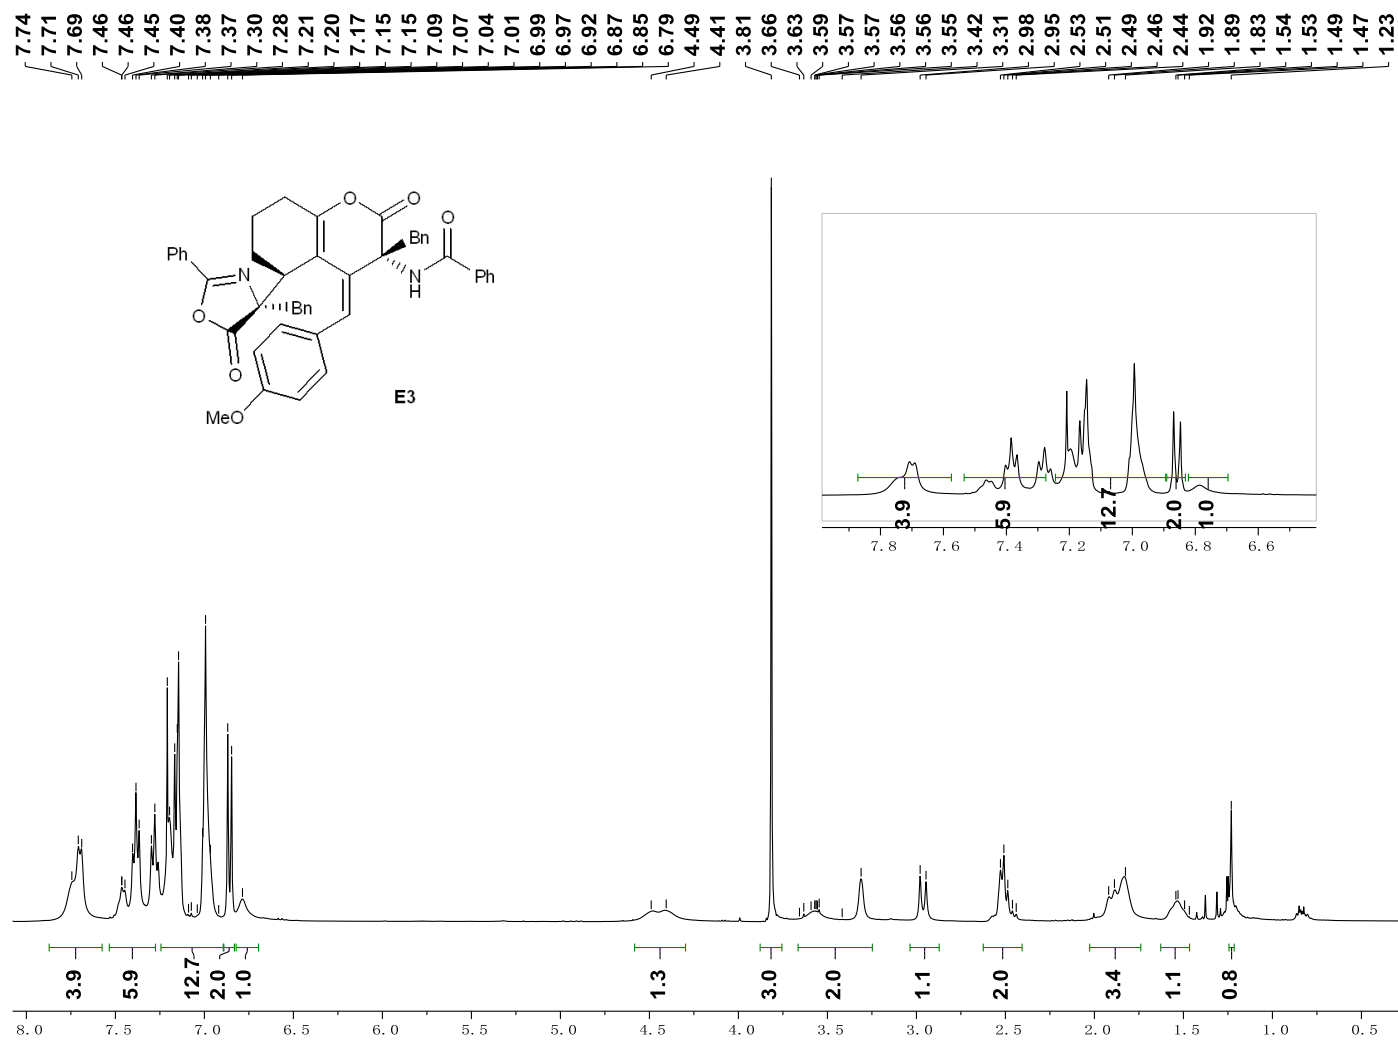



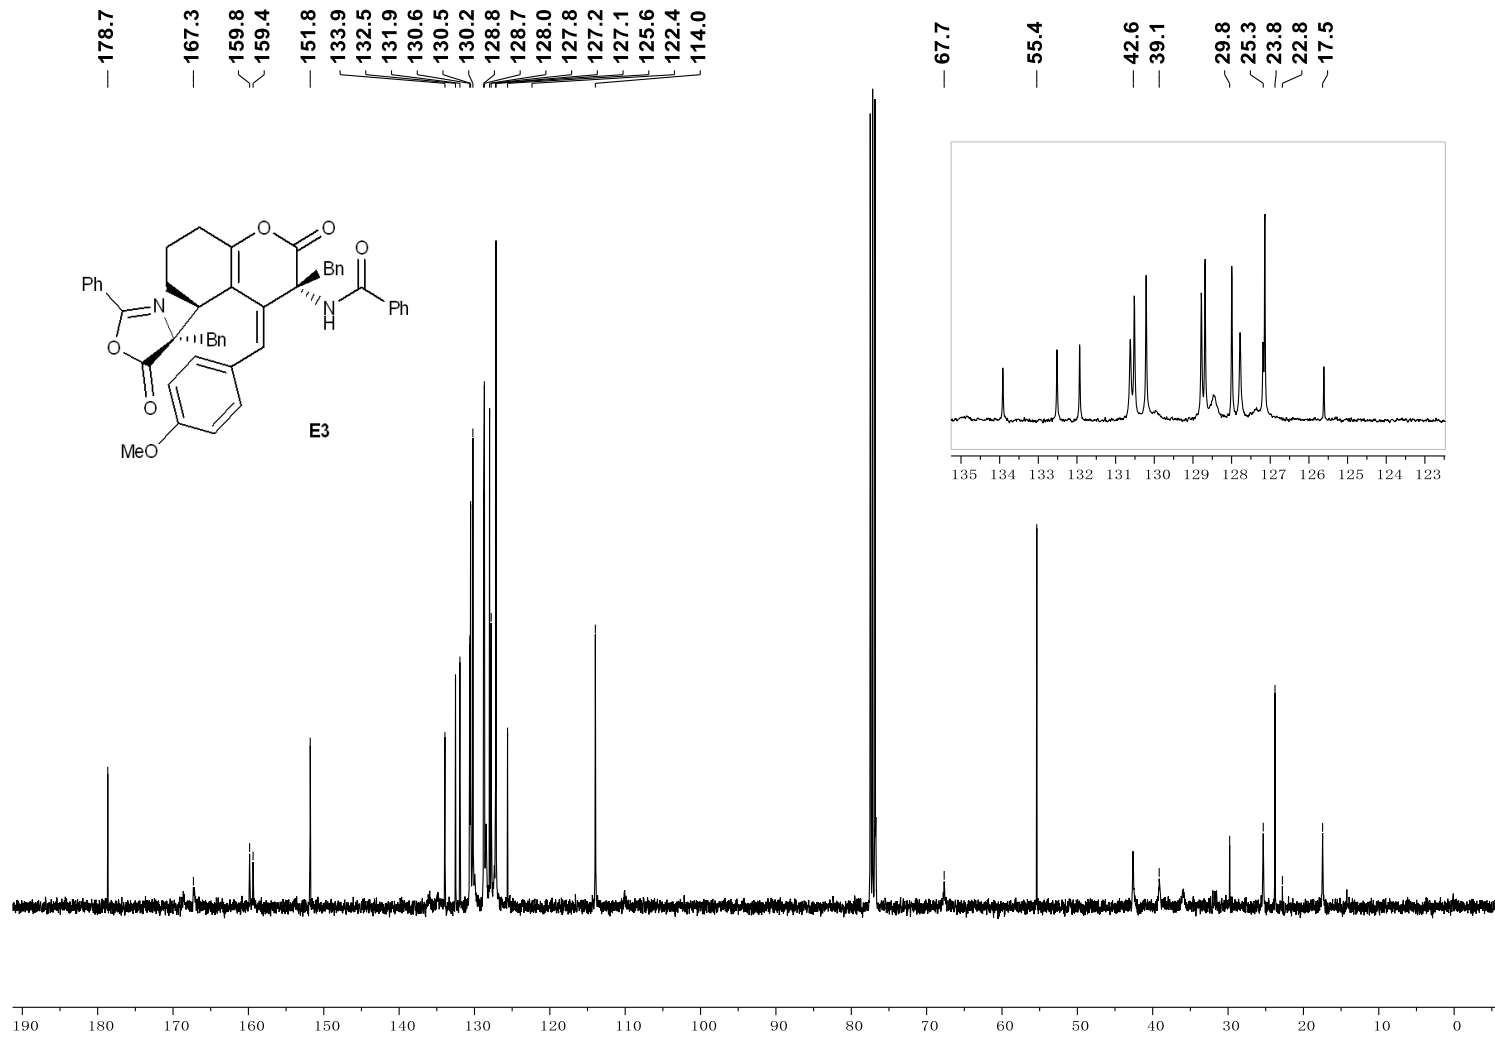

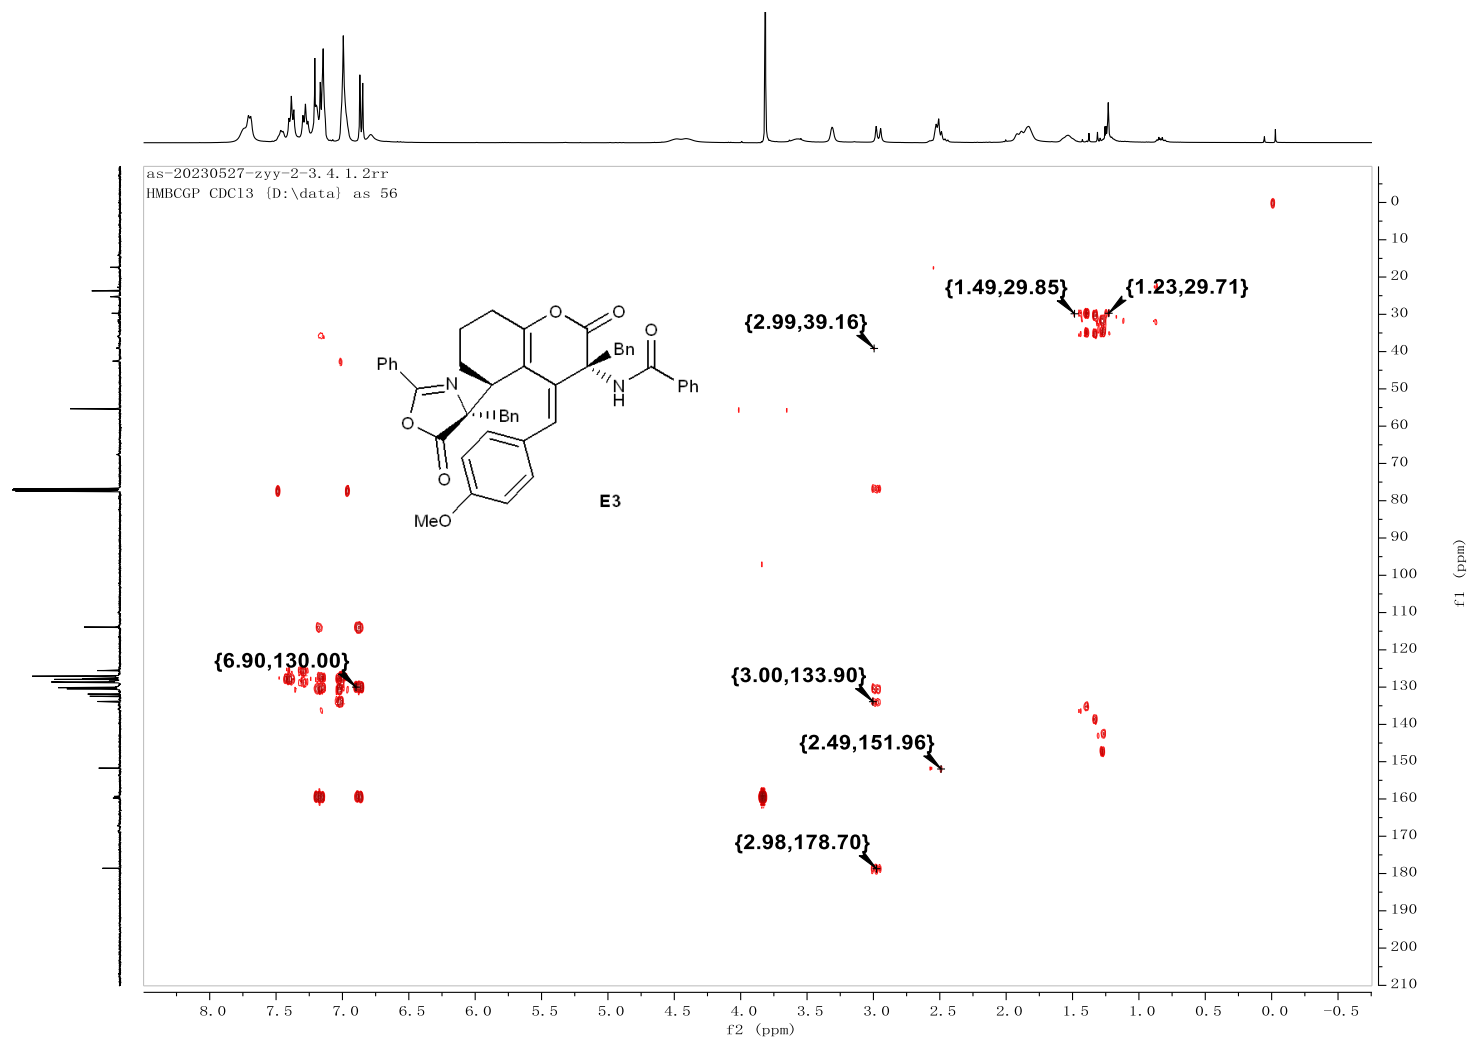

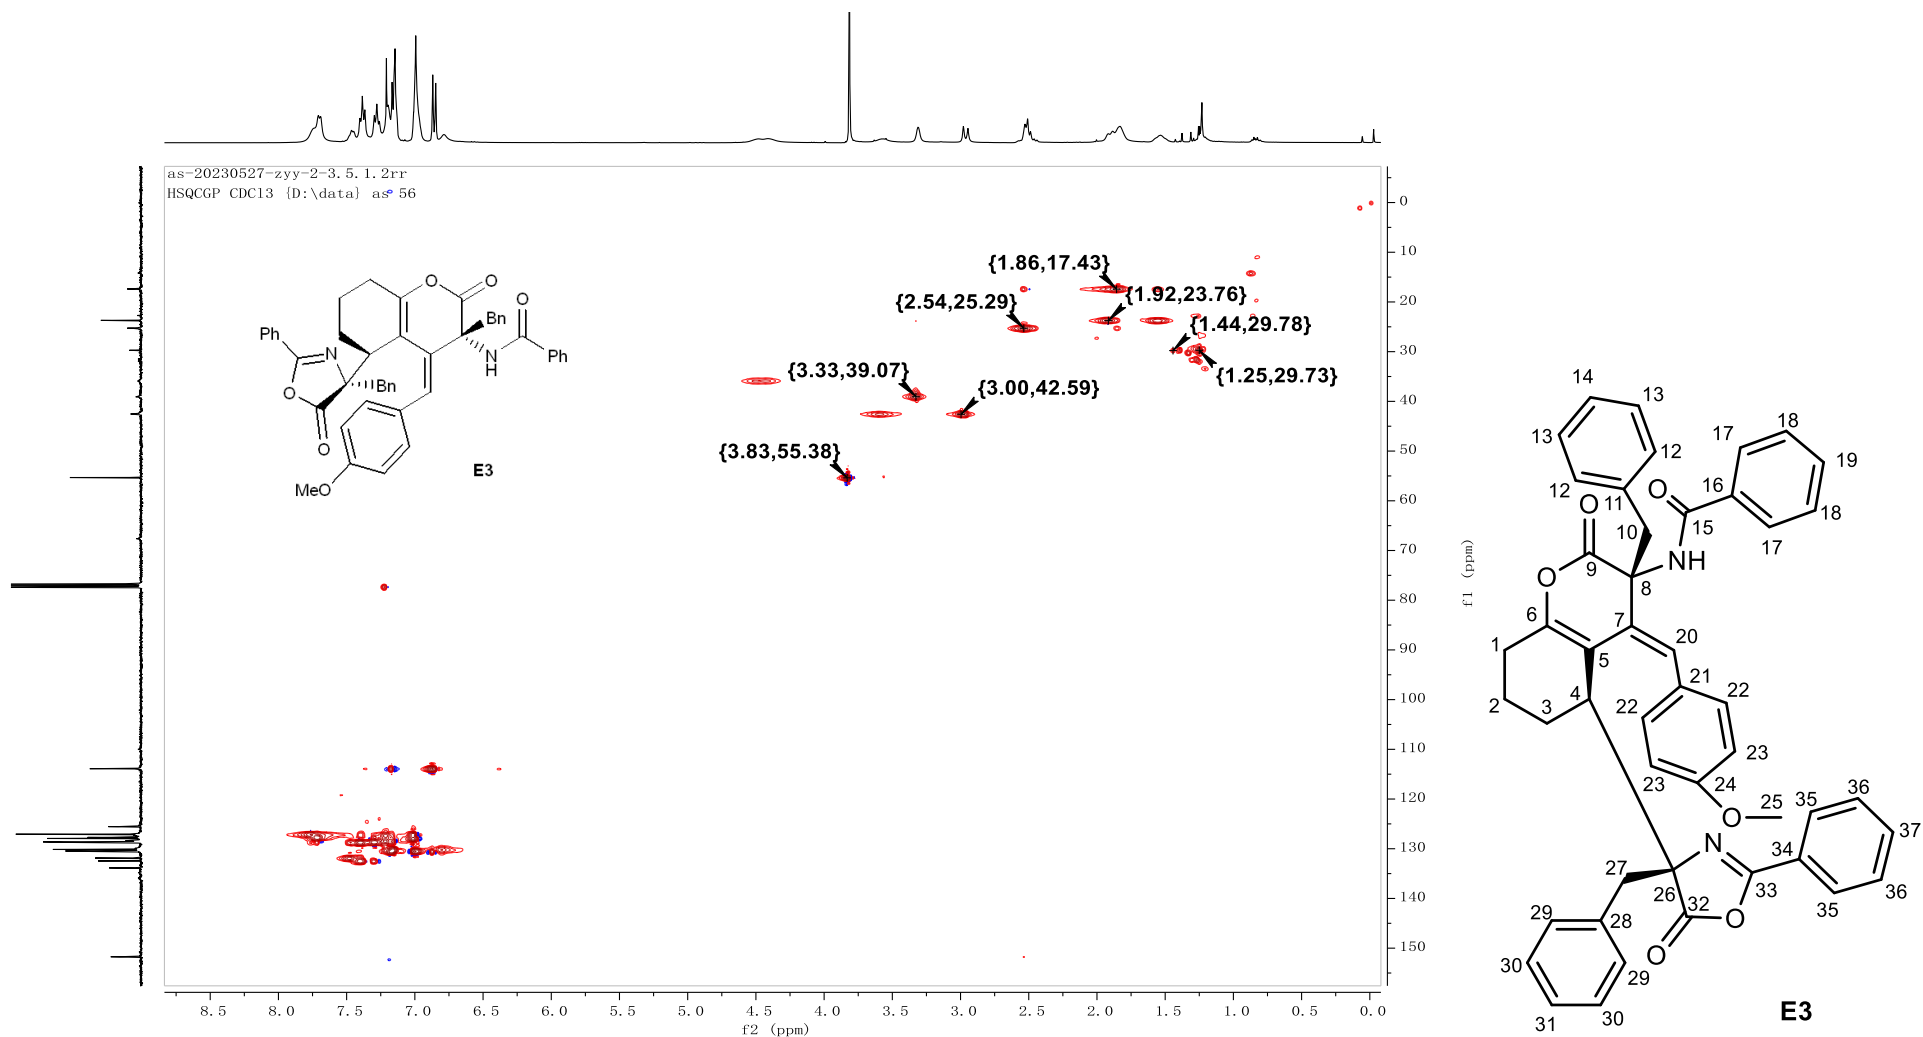

**HSQC-Correlation Peak:** (1.25, 29.7); (1.44, 29.8); (1.86, 17.4); (1.92, 23.8); (2.54, 25.3); (3.00, 42.6); (3.33, 39.1); (3.83, 55.4).

**HMBC-Correlation Peak:** (1.23, 29.7); (1.49, 29.9); (2.99, 39.2); (3.00, 133.9); (2.49, 152.0); (2.98, 178.7); (6.90, 130.0).

| Number of Atom | H (ppm)   | C (ppm)     |
|----------------|-----------|-------------|
| 1              | 1.21-1.62 | 29.8        |
| 2              | 1.75-2.05 | 17.5        |
| 3              | 3.24-3.68 | 39.1        |
| 4              | 2.90-3.03 | 42.6        |
| 5              | -         | 114.0-132.5 |
| 6              | -         | 133.9       |

---

|    |                      |             |
|----|----------------------|-------------|
| 7  | -                    | 114.0-132.5 |
| 8  | -                    | 67.7        |
| 9  | -                    | 167.3       |
| 10 | 1.75-2.05, 4.38-4.52 | 23.8        |
| 11 | -                    | 114.0-132.5 |
| 12 | 6.82-7.81            | 114.0-132.5 |
| 13 | 6.82-7.81            | 114.0-132.5 |
| 14 | 6.82-7.81            | 114.0-132.5 |
| 15 | -                    | 159.8       |
| 16 | -                    | 114.0-132.5 |
| 17 | 6.82-7.81            | 114.0-132.5 |
| 18 | 6.82-7.81            | 114.0-132.5 |
| 19 | 6.82-7.81            | 114.0-132.5 |
| 20 | 6.82-7.81            | 114.0-132.5 |
| 21 | -                    | 114.0-132.5 |
| 22 | 6.82-7.81            | 114.0-132.5 |
| 23 | 6.82-7.81            | 114.0-132.5 |
| 24 | -                    | 159.4       |
| 25 | 3.81(s)              | 55.4        |
| 26 | -                    | 22.8        |
| 27 | 2.41-2.57            | 25.3        |
| 28 | -                    | 114.0-132.5 |
| 29 | 6.82-7.81            | 114.0-132.5 |
| 30 | 6.82-7.81            | 114.0-132.5 |
| 31 | 6.82-7.81            | 114.0-132.5 |
| 32 | -                    | 178.7       |
| 33 | -                    | 151.8       |
| 34 | -                    | 114.0-132.5 |
| 35 | 6.82-7.81            | 114.0-132.5 |
| 36 | 6.82-7.81            | 114.0-132.5 |
| 37 | 6.82-7.81            | 114.0-132.5 |

---

## 11. Characterization of the products

### *N*-((3*S*,4*S*)-3-benzyl-2-oxo-4,6-diphenyl-5-(phenylethynyl)-3,4-dihydro-2*H*-pyran-3-yl)benzamide (D1)

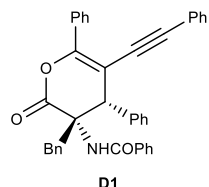

49.8 mg, 89% yield; white solid, melting point: 186.3 – 189.2 °C,  $[\alpha]_{\text{D}}^{22} = 40.2$  ( $c = 0.87$ ,  $\text{CH}_2\text{Cl}_2$ ).

Dissolved in *i*PrOH for SFC; SFC (Daicel chiralcel IC-3,  $\text{CO}_2/\text{IPROH} = 85/15$ , flow rate = 1.5 mL/min,  $\lambda = 254$  nm) retention time:  $t_{\text{major}} = 3.94$  min,  $t_{\text{minor}} = 5.68$  min. er = 95:5. dr >19:1.

$^1\text{H NMR}$  (400 MHz,  $\text{CDCl}_3$ )  $\delta$  8.28 – 8.22 (m, 2H), 7.58 – 7.43 (m, 3H), 7.44 – 7.08 (m, 20H), 6.65 (s, 1H), 5.18 (s, 1H), 4.37 (d,  $J = 12.0$  Hz, 1H), 3.60 (d,  $J = 16.0$  Hz, 1H).

$^{13}\text{C NMR}$  (101 MHz,  $\text{CDCl}_3$ )  $\delta$  168.0, 168.0, 151.9, 136.3, 135.1, 134.8, 131.7, 131.5, 131.4, 130.4, 130.1, 128.9, 128.7, 128.6, 128.5, 128.5, 128.2, 127.7, 127.6, 126.7, 122.9, 102.7, 96.6, 86.3, 64.7, 52.6, 38.5.

**IR** (neat):  $\nu(\text{cm}^{-1})$ : 3416, 2923, 1768, 1665, 1485, 1165, 692, 528.

**HRMS** (ESI-TOF) calcd for  $\text{C}_{39}\text{H}_{29}\text{NO}_3^+$  ( $[\text{M}]+\text{H}^+$ ) = 560.2220, found 560.2224.

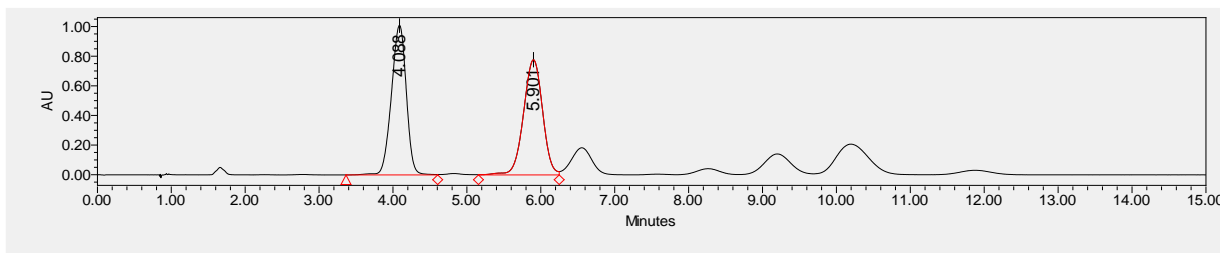

|   | Retention Time | Area     | % Area |
|---|----------------|----------|--------|
| 1 | 4.088          | 14105758 | 50.37  |
| 2 | 5.901          | 13898569 | 49.63  |

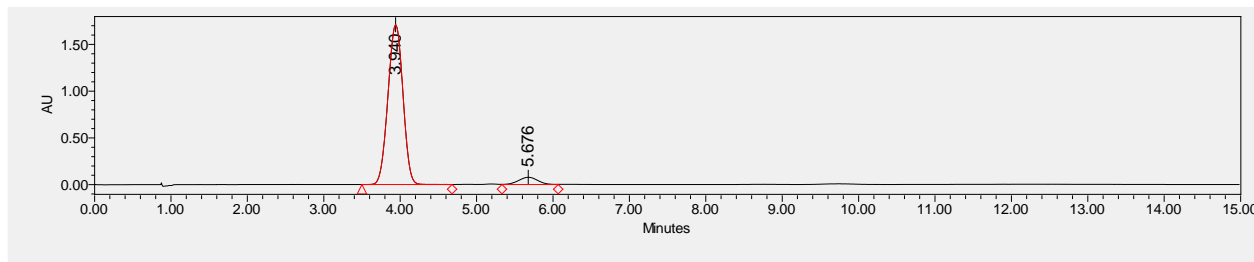

|   | Retention Time | Area     | % Area |
|---|----------------|----------|--------|
| 1 | 3.940          | 23205226 | 94.50  |
| 2 | 5.676          | 1351045  | 5.50   |

***N*-((3*S*,4*S*)-3-benzyl-2-oxo-6-phenyl-5-(phenylethynyl)-4-(*p*-tolyl)-3,4-dihydro-2H-pyran-3-yl)benzamide (D2)**

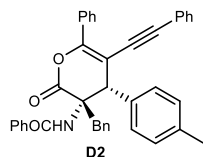

49.3 mg, 86% yield; white solid, melting point: 91.2 – 94.7 °C,  $[\alpha]_D^{19} = 33.0$  ( $c = 0.71$ ,  $\text{CH}_2\text{Cl}_2$ ).

Dissolved in *i*PrOH for SFC; SFC (Daicel chiralcel IA-3,  $\text{CO}_2/\text{MeOH} = 85/15$ , flow rate = 1.5 mL/min,  $\lambda = 254$  nm) retention time:  $t_{\text{major}} = 9.99$  min,  $t_{\text{minor}} = 7.41$  min. er = 89:11. dr >19:1.

**$^1\text{H NMR}$**  (400 MHz,  $\text{CDCl}_3$ )  $\delta$  8.29 – 8.22 (m, 2H), 7.59 – 7.45 (m, 3H), 7.48 – 7.18 (m, 15H), 7.14 – 7.01 (m, 4H), 6.64 (s, 1H), 5.14 (s, 1H), 4.34 (d,  $J = 12.0$  Hz, 1H), 3.58 (d,  $J = 12.0$  Hz, 1H), 2.23 (s, 3H).

**$^{13}\text{C NMR}$**  (101 MHz,  $\text{CDCl}_3$ )  $\delta$  168.1, 168.0, 151.8, 137.9, 135.2, 134.9, 133.1, 131.7, 131.5, 130.4, 130.1, 129.6, 128.7, 128.6, 128.5, 128.1, 127.7, 127.6, 126.8, 123.0, 103.0, 96.6, 86.4, 64.9, 52.2, 38.5, 21.2.

**IR** (neat):  $\nu(\text{cm}^{-1})$ : 3419, 3029, 1768, 1666, 1512, 1166, 753, 528.

**HRMS** (ESI-TOF) calcd for  $\text{C}_{40}\text{H}_{31}\text{NO}_3^+$  ( $[\text{M}+\text{H}^+]$ ) = 574.2377, found 574.2379.

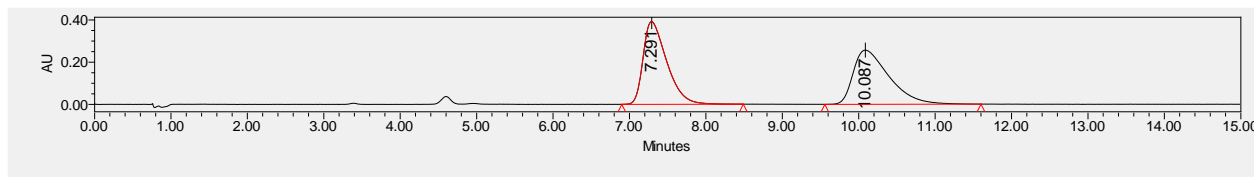

|   | Retention Time | Area    | % Area |
|---|----------------|---------|--------|
| 1 | 7.291          | 8417752 | 50.12  |
| 2 | 10.087         | 8376888 | 49.88  |

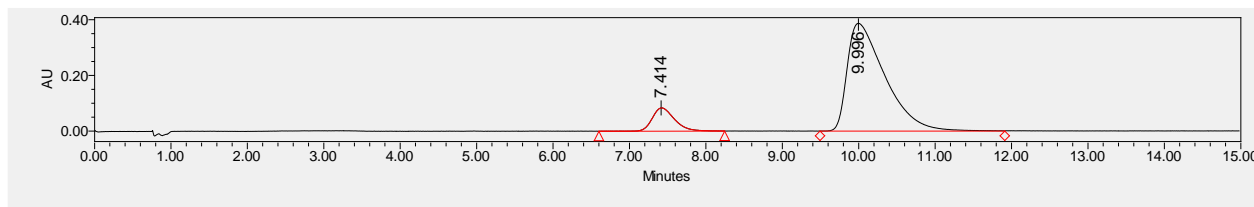

|   | Retention Time | Area     | % Area |
|---|----------------|----------|--------|
| 1 | 7.414          | 1696537  | 11.30  |
| 2 | 9.996          | 13318101 | 88.70  |

***N*-((3*S*,4*S*)-3-benzyl-4-(4-methoxyphenyl)-2-oxo-6-phenyl-5-(phenylethynyl)-3,4-dihydro-2*H*-pyran-3-yl)benzamide (D3)**

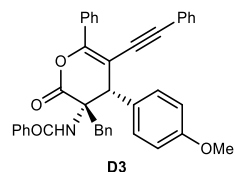

24.1 mg, 41% yield; pale yellow solid, melting point: 93.2 – 97.5 °C,  $[\alpha]_D^{20} = 30.8$  ( $c = 0.40$ ,  $\text{CH}_2\text{Cl}_2$ ).

Dissolved in *i*PrOH for SFC; SFC (Daicel chiralcel IA-3,  $\text{CO}_2/\text{MeOH} = 85/15$ , flow rate = 1.5 mL/min,  $\lambda = 254$  nm) retention time:  $t_{\text{major}} = 10.48$  min,  $t_{\text{minor}} = 8.73$  min. er = 93:7. dr >19:1.

**$^1\text{H NMR}$**  (400 MHz,  $\text{CDCl}_3$ )  $\delta$  8.28 – 8.23 (m, 2H), 7.59 – 7.46 (m, 3H), 7.47 – 7.41 (m, 3H), 7.42 – 7.26 (m, 7H), 7.29 – 7.18 (m, 5H), 7.15 – 7.07 (m, 2H), 6.79 – 6.74 (m, 2H), 6.65 (s, 1H), 5.12 (s, 1H), 4.33 (d,  $J = 12.0$  Hz, 1H), 3.70 (s, 3H), 3.57 (d,  $J = 12.0$  Hz, 1H).

**$^{13}\text{C NMR}$**  (101 MHz,  $\text{CDCl}_3$ )  $\delta$  168.1, 168.0, 159.4, 151.7, 135.2, 135.0, 131.7, 131.5, 131.5, 130.4, 130.1, 129.4, 128.7, 128.6, 128.5, 128.5, 128.1, 127.7, 127.6, 126.8, 123.0, 114.3, 103.1, 96.6, 86.4, 65.0, 55.3, 51.8, 38.5.

**IR** (neat):  $\nu(\text{cm}^{-1})$ : 3418, 2928, 1768, 1666, 1512, 1261, 755, 528.

**HRMS** (ESI-TOF) calcd for  $\text{C}_{40}\text{H}_{31}\text{NO}_4^+$  ( $[\text{M}+\text{H}^+]$ ) = 590.2326, found 590.2328.

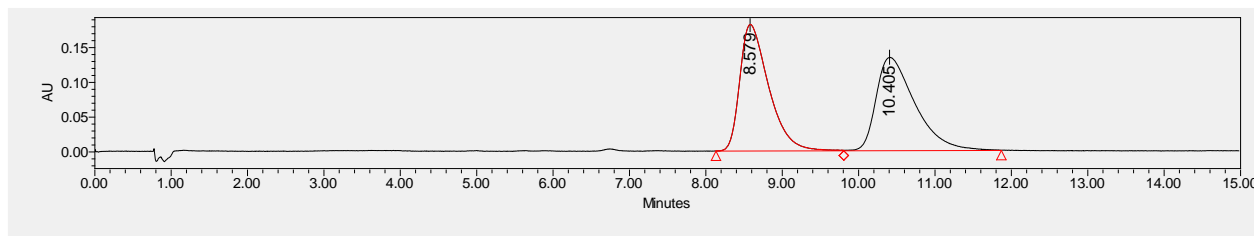

|   | Retention Time | Area    | % Area |
|---|----------------|---------|--------|
| 1 | 8.579          | 4786115 | 50.24  |
| 2 | 10.405         | 4740546 | 49.76  |

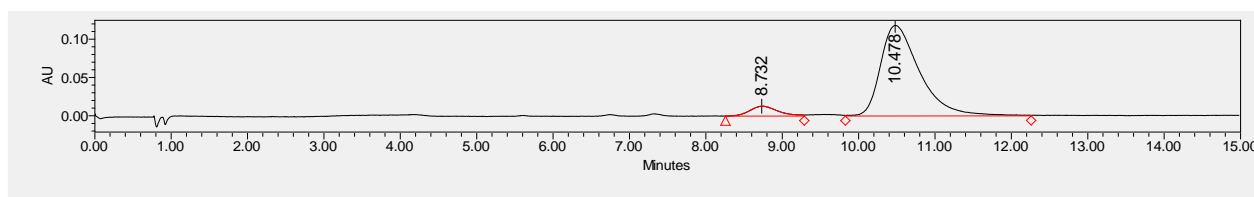

|   | Retention Time | Area    | % Area |
|---|----------------|---------|--------|
| 1 | 8.732          | 332242  | 7.31   |
| 2 | 10.478         | 4214833 | 92.69  |

***N*-((3*S*,4*S*)-3-benzyl-4-(4-fluorophenyl)-2-oxo-6-phenyl-5-(phenylethynyl)-3,4-dihydro-2*H*-pyran-3-yl)benzamide (D4)**

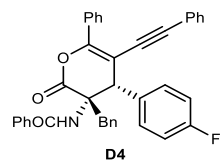

49.6 mg, 86% yield; white solid, melting point: 98.6 – 101.4 °C,  $[\alpha]_D^{20} = 49.0$  ( $c = 0.87$ ,  $\text{CH}_2\text{Cl}_2$ ).

Dissolved in *i*PrOH for SFC; SFC (Daicel chiralcel IA-3,  $\text{CO}_2/\text{MeOH} = 85/15$ , flow rate = 1.5 mL/min,  $\lambda = 254$  nm) retention time:  $t_{\text{major}} = 6.64$  min,  $t_{\text{minor}} = 4.79$  min. er = 92:8. dr >19:1.

**$^1\text{H NMR}$**  (400 MHz,  $\text{CDCl}_3$ )  $\delta$  8.29 – 8.22 (m, 2H), 7.59 – 7.27 (m, 15H), 7.25 – 7.20 (m, 3H), 7.13 – 7.09 (m, 2H), 6.96 – 6.90 (m, 2H), 6.67 (s, 1H), 5.18 (s, 1H), 4.32 (d,  $J = 12.0$  Hz, 1H), 3.58 (d,  $J = 12.0$  Hz, 1H).

**$^{13}\text{C NMR}$**  (101 MHz,  $\text{CDCl}_3$ )  $\delta$  168.0, 167.9, 162.6 (d,  $J = 240.0$  Hz), 151.9, 134.9, 134.7, 132.2 (d,  $J = 10.0$  Hz), 131.9, 131.5, 131.3, 130.5, 130.1, 130.0, 129.9, 128.8, 128.8, 128.6, 128.5, 127.7, 127.7, 126.7, 122.8, 115.9 (d,  $J = 20.0$  Hz), 102.6, 96.8, 86.1, 64.7, 51.9, 38.6.



$^{19}\text{F}$  NMR (376 MHz,  $\text{CDCl}_3$ )  $\delta$  -113.74.

IR (neat):  $\nu(\text{cm}^{-1})$ : 3415, 3061, 1766, 1663, 1509, 1161, 690, 528.

HRMS (ESI-TOF) calcd for  $\text{C}_{39}\text{H}_{28}\text{FNO}_3^+$  ( $[\text{M}+\text{H}]^+$ ) = 578.2126, found 578.2129.

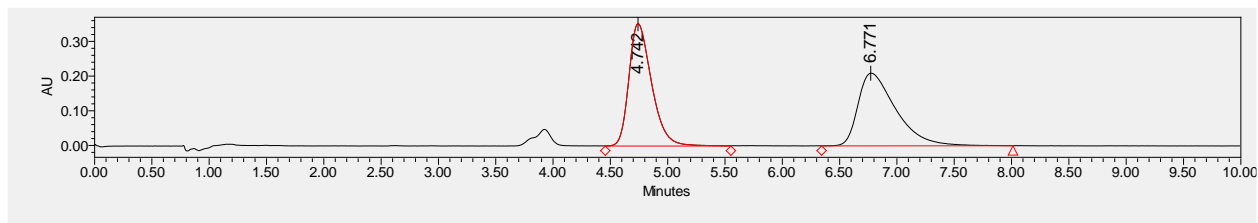

|   | Retention Time | Area    | % Area |
|---|----------------|---------|--------|
| 1 | 4.742          | 4850723 | 50.22  |
| 2 | 6.771          | 4809094 | 49.78  |

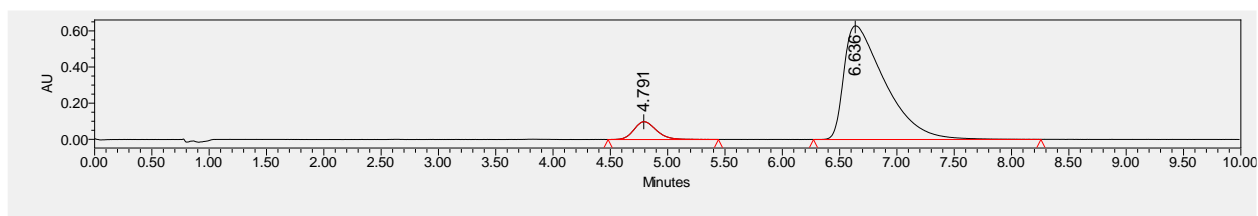

|   | Retention Time | Area     | % Area |
|---|----------------|----------|--------|
| 1 | 4.791          | 1347749  | 7.93   |
| 2 | 6.636          | 15642650 | 92.07  |

*N*-((3*S*,4*S*)-3-benzyl-4-(4-chlorophenyl)-2-oxo-6-phenyl-5-(phenylethynyl)-3,4-dihydro-2*H*-pyran-3-yl)benzamide (D5)

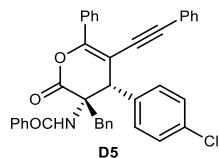

53.5 mg, 90% yield; white solid, melting point: 100.2 – 104.7 °C,  $[\alpha]_{\text{D}}^{19} = 25.9$  ( $c = 0.90$ ,  $\text{CH}_2\text{Cl}_2$ ).

Dissolved in *i*PrOH for SFC; SFC (Daicel chiralcel IA-3,  $\text{CO}_2/\text{MeOH} = 85/15$ , flow rate = 1.5 mL/min,  $\lambda = 254$  nm) retention time:  $t_{\text{major}} = 10.50$  min,  $t_{\text{minor}} = 7.26$  min. er = 91:9. dr >19:1.

**<sup>1</sup>H NMR** (400 MHz, CDCl<sub>3</sub>) δ 8.28 – 8.22 (m, 2H), 7.59 – 7.40 (m, 6H), 7.42 – 7.17 (m, 14H), 7.15 – 7.06 (m, 2H), 6.68 (s, 1H), 5.18 (s, 1H), 4.32 (d, *J* = 12.0 Hz, 1H), 3.58 (d, *J* = 12.0 Hz, 1H).

**<sup>13</sup>C NMR** (101 MHz, CDCl<sub>3</sub>) δ 168.0, 167.8, 152.0, 134.9, 134.8, 134.6, 134.1, 131.9, 131.5, 131.2, 130.6, 130.1, 129.7, 129.1, 128.9, 128.8, 128.6, 128.5, 127.7, 126.8, 122.7, 102.4, 96.9, 86.0, 64.6, 52.0, 38.6.

**IR** (neat):  $\nu$ (cm<sup>-1</sup>): 3416, 3030, 1769, 1666, 1488, 1166, 753, 529.

**HRMS** (ESI-TOF) calcd for C<sub>39</sub>H<sub>28</sub>ClNO<sub>3</sub><sup>+</sup> ([M]<sup>+</sup>+H<sup>+</sup>) = 594.1830, 595.1864, found 594.1837, 595.1865.

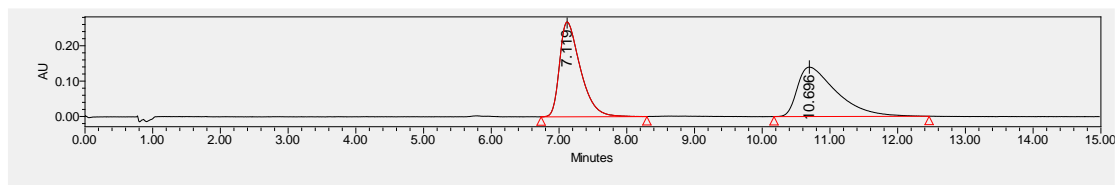

|   | Retention Time | Area    | % Area |
|---|----------------|---------|--------|
| 1 | 7.119          | 5722630 | 50.55  |
| 2 | 10.696         | 5597601 | 49.45  |

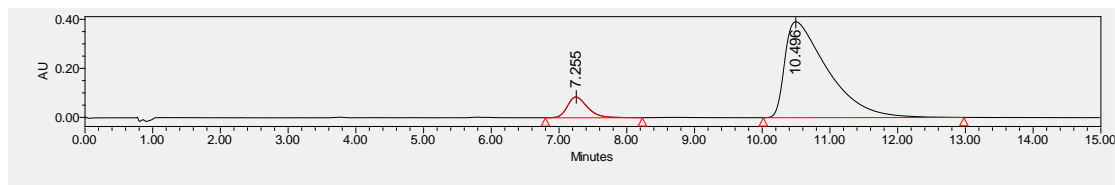

|   | Retention Time | Area     | % Area |
|---|----------------|----------|--------|
| 1 | 7.255          | 1755465  | 9.27   |
| 2 | 10.496         | 17177644 | 90.73  |

***N*-((3*S*,4*S*)-3-benzyl-4-(4-bromophenyl)-2-oxo-phenyl-5-(phenylethynyl)-3,4-dihydro-2H-pyran-3-yl)benzamide (D6)**

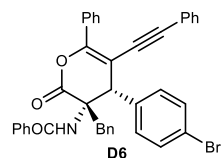

47.9 mg, 75% yield; pale yellow solid, melting point: 97.3 – 99.8 °C, [ $\alpha$ ]<sub>D</sub><sup>19</sup> = 16.0 (*c* = 0.60, CH<sub>2</sub>Cl<sub>2</sub>).

Dissolved in *i*PrOH for SFC; SFC (Daicel chiralcel IA-3, CO<sub>2</sub>/MeOH = 85/15, flow rate = 1.5 mL/min,  $\lambda$  = 254 nm) retention time: *t*<sub>major</sub> = 13.46 min, *t*<sub>minor</sub> = 8.87 min. er = 92:8. dr >19:1.

**<sup>1</sup>H NMR** (400 MHz, CDCl<sub>3</sub>) δ 8.28 – 8.20 (m, 2H), 7.59 – 7.27 (m, 15H), 7.27 – 7.17 (m, 5H), 7.14 – 7.06 (m, 2H), 6.68 (s, 1H), 5.16 (s, 1H), 4.31 (d, *J* = 16.0 Hz, 1H), 3.57 (d, *J* = 16.0 Hz, 1H).

**<sup>13</sup>C NMR** (101 MHz, CDCl<sub>3</sub>) δ 168.0, 167.8, 152.0, 135.5, 134.8, 134.6, 132.1, 131.9, 131.5, 131.2, 130.6, 130.1, 130.0, 128.9, 128.8, 128.6, 128.6, 127.7, 126.8, 122.7, 122.4, 102.3, 96.9, 86.0, 64.5, 52.1, 38.6.

**IR** (neat):  $\nu$ (cm<sup>-1</sup>): 3415, 3030, 1769, 1666, 1486, 1166, 754, 528.

**HRMS** (ESI-TOF) calcd for C<sub>39</sub>H<sub>28</sub>BrNO<sub>3</sub><sup>+</sup> ([M]+H<sup>+</sup>) = 638.1325, 640.1305, found 638.1329, 640.1302.

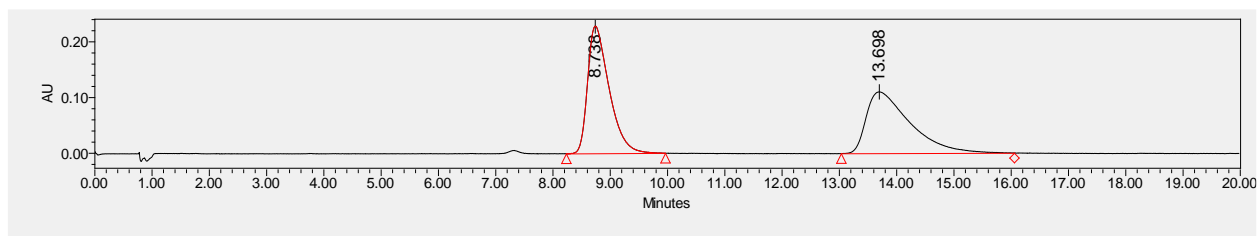

|   | Retention Time | Area    | % Area |
|---|----------------|---------|--------|
| 1 | 8.738          | 5989133 | 50.25  |
| 2 | 13.698         | 5928445 | 49.75  |

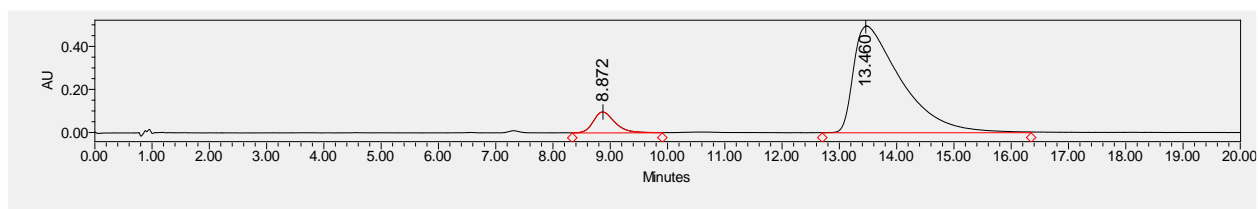

|   | Retention Time | Area     | % Area |
|---|----------------|----------|--------|
| 1 | 8.872          | 2561746  | 8.18   |
| 2 | 13.460         | 28764468 | 91.82  |

***N*-((3*S*,4*S*)-3-benzyl-2-oxo-6-phenyl-5-(phenylethynyl)-4-(3-(trifluoromethyl)phenyl)-3,4-dihydro-2H-pyran-3-yl)benzamide (D7)**

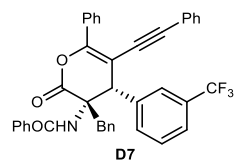

52.7 mg, 84% yield; pale yellow solid, melting point: 88.5 – 90.4 °C,  $[\alpha]_D^{19} = 51.1$  ( $c = 0.90$ ,  $\text{CH}_2\text{Cl}_2$ ).

Dissolved in *i*PrOH for SFC; SFC (Daicel chiralcel IA-3,  $\text{CO}_2/\text{MeOH} = 90/10$ , flow rate = 1.0 mL/min,  $\lambda = 254$  nm) retention time:  $t_{\text{major}} = 9.87$  min,  $t_{\text{minor}} = 8.02$  min. er = 86:14. dr >19:1.

$^1\text{H NMR}$  (400 MHz,  $\text{CDCl}_3$ )  $\delta$  8.28 – 8.25 (m, 2H), 7.72 – 7.67 (m, 1H), 7.61 – 7.20 (m, 19H), 7.15 – 7.08 (m, 2H), 6.65 (s, 1H), 5.29 (s, 1H), 4.34 (d,  $J = 16.0$  Hz, 1H), 3.60 (d,  $J = 12.0$  Hz, 1H).

$^{13}\text{C NMR}$  (101 MHz,  $\text{CDCl}_3$ )  $\delta$  168.2, 167.6, 152.4, 137.4, 134.7, 134.5, 131.9, 131.5, 131.3, 131.2, 131.0, 130.8, 130.7, 130.1, 129.6, 129.1, 128.9, 128.7, 128.7, 128.6, 127.8, 126.8, 126.0 (q,  $J = 3.3$  Hz), 125.2 (q,  $J = 3.3$  Hz), 122.6, 122.6, 101.9, 97.0, 85.9, 64.6, 52.3, 38.6.

$^{19}\text{F NMR}$  (377 MHz,  $\text{CDCl}_3$ )  $\delta$  -62.56.

**IR** (neat):  $\nu(\text{cm}^{-1})$ : 3416, 3031, 1769, 1665, 1327, 1165, 755, 529.

**HRMS** (ESI-TOF) calcd for  $\text{C}_{40}\text{H}_{28}\text{F}_3\text{NO}_3^+$  ( $[\text{M}]+\text{H}^+$ ) = 628.2094, found 628.2095.

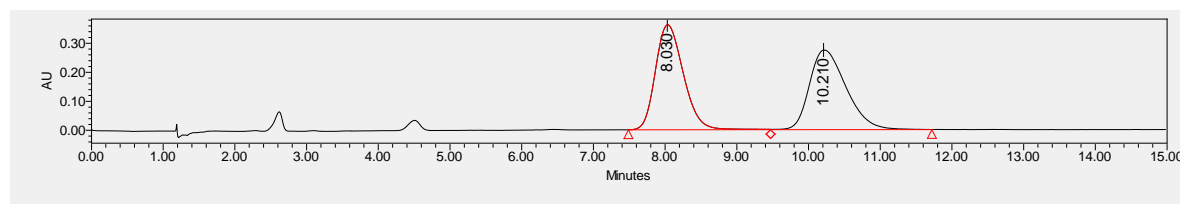

|   | Retention Time | Area    | % Area |
|---|----------------|---------|--------|
| 1 | 8.030          | 9787718 | 50.15  |
| 2 | 10.210         | 9727338 | 49.85  |

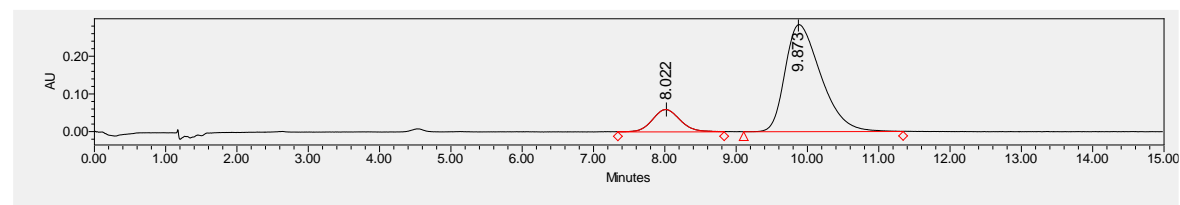

|   | Retention Time | Area    | % Area |
|---|----------------|---------|--------|
| 1 | 8.022          | 1605504 | 13.93  |
| 2 | 9.873          | 9916634 | 86.07  |

***N*-((3*S*,4*S*)-3-benzyl-4-(3-chlorophenyl)-2-oxo-6-phenyl-5-(phenylethynyl)-3,4-dihydro-2H-pyran-3-yl)benzamide (D8)**

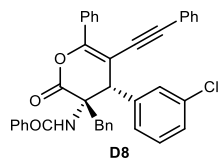

37.4 mg, 63% yield; white solid, melting point: 91.0 – 92.7 °C,  $[\alpha]_D^{19} = 46.4$  ( $c = 0.60$ ,  $\text{CH}_2\text{Cl}_2$ ).

Dissolved in *i*PrOH for SFC; SFC (Daicel chiralcel IA-3,  $\text{CO}_2/\text{MeOH} = 90/10$ , flow rate = 1.5 mL/min,  $\lambda = 254$  nm) retention time:  $t_{\text{major}} = 15.15$  min,  $t_{\text{minor}} = 11.56$  min. er = 88:12. dr >19:1.

$^1\text{H NMR}$  (400 MHz,  $\text{CDCl}_3$ )  $\delta$  8.28 – 8.24 (m, 2H), 7.60 – 7.47 (m, 3H), 7.50 – 7.28 (m, 11H), 7.27 – 7.06 (m, 8H), 6.65 (s, 1H), 5.17 (s, 1H), 4.33 (d,  $J = 16.0$  Hz, 1H), 3.57 (d,  $J = 16.0$  Hz, 1H).

$^{13}\text{C NMR}$  (101 MHz,  $\text{CDCl}_3$ )  $\delta$  168.3, 167.6, 152.2, 138.3, 135.0, 134.7, 134.6, 131.8, 131.5, 131.2, 130.6, 130.2, 130.1, 128.9, 128.8, 128.7, 128.6, 128.6, 127.8, 127.7, 126.8, 126.2, 122.7, 102.0, 96.9, 86.0, 64.6, 52.2, 38.6.

**IR** (neat):  $\nu(\text{cm}^{-1})$ : 3415, 3029, 1770, 1666, 1485, 1166, 752, 532.

**HRMS** (ESI-TOF) calcd for  $\text{C}_{39}\text{H}_{28}\text{ClNO}_3^+$  ( $[\text{M}+\text{H}]^+$ ) = 594.1830, 595.1864, found 594.1833, 595.1865.

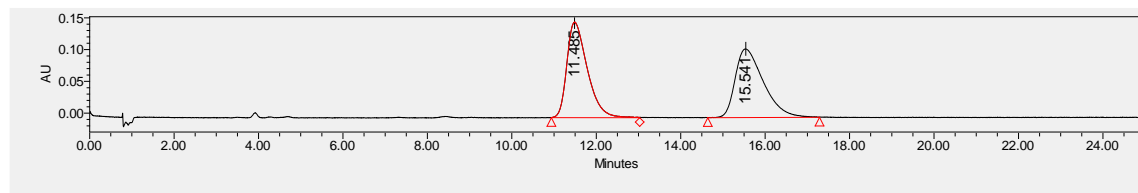

|   | Retention Time | Area    | % Area |
|---|----------------|---------|--------|
| 1 | 11.485         | 5035647 | 50.08  |
| 2 | 15.541         | 5020458 | 49.92  |

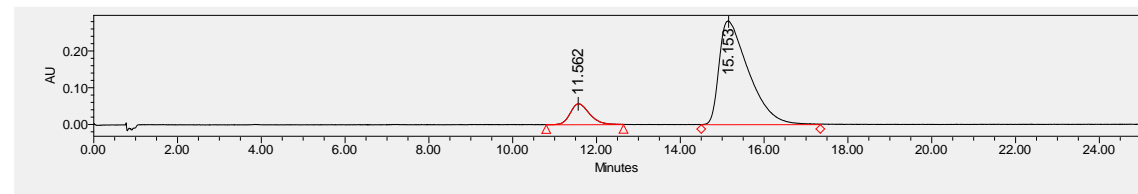

|   | Retention Time | Area     | % Area |
|---|----------------|----------|--------|
| 1 | 11.562         | 1842215  | 11.76  |
| 2 | 15.153         | 13819510 | 88.24  |

***N*-((3*S*,4*S*)-3-benzyl-2-oxo-4,6-diphenyl-5-(*p*-tolylethynyl)-3,4-dihydro-2*H*-pyran-3-yl)benzamide (D9)**

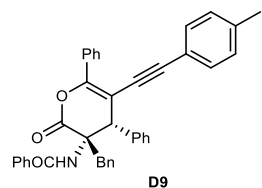

48.1 mg, 84% yield; pale yellow solid, melting point: 157.2 – 160.4 °C,  $[\alpha]_D^{19} = 34.8$  ( $c = 0.72$ ,  $\text{CH}_2\text{Cl}_2$ ).

Dissolved in *i*PrOH for SFC; SFC (Daicel chiralcel IA-3,  $\text{CO}_2/\text{MeOH} = 85/15$ , flow rate = 1.5 mL/min,  $\lambda = 254$  nm) retention time:  $t_{\text{major}} = 11.29$  min,  $t_{\text{minor}} = 6.95$  min. er = 90:10. dr >19:1.

$^1\text{H NMR}$  (400 MHz,  $\text{CDCl}_3$ )  $\delta$  8.29 – 8.22 (m, 2H), 7.58 – 7.44 (m, 3H), 7.47 – 7.34 (m, 3H), 7.36 – 7.15 (m, 12H), 7.16 – 7.07 (m, 4H), 6.63 (s, 1H), 5.16 (s, 1H), 4.36 (d,  $J = 12.0$  Hz, 1H), 3.59 (d,  $J = 16.0$  Hz, 1H), 2.33 (s, 3H).

$^{13}\text{C NMR}$  (101 MHz,  $\text{CDCl}_3$ )  $\delta$  168.1, 151.5, 139.0, 136.4, 135.2, 134.9, 131.7, 131.5, 131.4, 130.3, 130.1, 129.3, 128.9, 128.7, 128.6, 128.5, 128.3, 128.2, 127.7, 127.6, 126.8, 119.9, 103.0, 97.0, 85.7, 64.8, 52.7, 38.6, 21.7.

**IR** (neat):  $\nu(\text{cm}^{-1})$ : 3418, 3030, 1770, 1666, 1511, 1167, 753, 528.

**HRMS** (ESI-TOF) calcd for  $\text{C}_{40}\text{H}_{31}\text{NO}_3^+$  ( $[\text{M}+\text{H}^+]$ ) = 574.2377, found 574.2379.

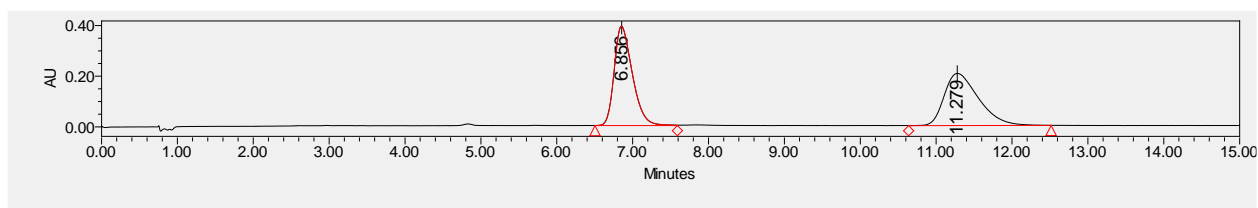

|   | Retention Time | Area    | % Area |
|---|----------------|---------|--------|
| 1 | 6.856          | 6518930 | 50.22  |
| 2 | 11.279         | 6460883 | 49.78  |

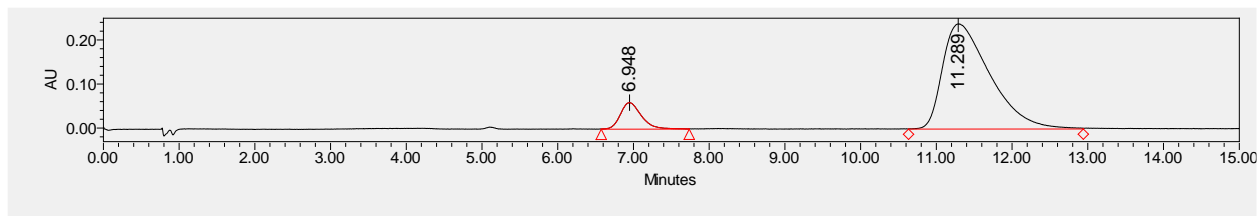

|   | Retention Time | Area     | % Area |
|---|----------------|----------|--------|
| 1 | 6.948          | 1165666  | 10.08  |
| 2 | 11.289         | 10401995 | 89.92  |

***N*-((3*S*,4*S*)-3-benzyl-5-((4-fluorophenyl)ethynyl)-2-oxo-4,6-diphenyl-3,4-dihydro-2*H*-pyran-3-yl)benzamide (D10)**

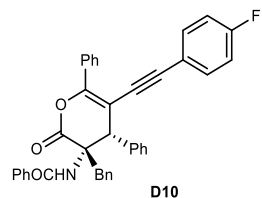

45.0 mg, 78% yield; white solid, melting point: 92.7 – 95.3 °C,  $[\alpha]_D^{19} = 47.9$  ( $c = 0.72$ ,  $\text{CH}_2\text{Cl}_2$ ).

Dissolved in *i*PrOH for SFC; SFC (Daicel chiralcel IA-3,  $\text{CO}_2/\text{MeOH} = 85/15$ , flow rate = 1.5 mL/min,  $\lambda = 254$  nm) retention time:  $t_{\text{major}} = 7.11$  min,  $t_{\text{minor}} = 5.72$  min. er = 91:9. dr >19:1.

**$^1\text{H}$  NMR** (400 MHz,  $\text{CDCl}_3$ )  $\delta$  8.25 – 8.21 (m, 2H), 7.59 – 7.45 (m, 3H), 7.47 – 7.27 (m, 9H), 7.29 – 7.16 (m, 6H), 7.13 – 7.10 (m, 2H), 7.05 – 6.94 (m, 2H), 6.63 (s, 1H), 5.15 (s, 1H), 4.36 (d,  $J = 12.0$  Hz, 1H), 3.58 (d,  $J = 16.0$  Hz, 1H).

**$^{13}\text{C}$  NMR** (101 MHz,  $\text{CDCl}_3$ )  $\delta$  168.1, 168.0, 162.8 (d,  $J = 250.6$  Hz), 152.0, 136.3, 135.1, 134.8, 133.4 (d,  $J = 8.3$  Hz), 131.7, 131.4, 130.5, 130.1, 129.0, 128.7, 128.6, 128.5, 128.3, 128.3, 127.7, 127.6, 126.8, 119.04 (d,  $J = 3.5$  Hz), 115.87 (d,  $J = 22.1$  Hz), 102.6, 95.4, 86.0, 64.8, 52.6, 38.6.

**$^{19}\text{F}$  NMR** (376 MHz,  $\text{CDCl}_3$ )  $\delta$  -109.96.

**IR** (neat):  $\nu(\text{cm}^{-1})$ : 3417, 3031, 1768, 1665, 1452, 1156, 696, 529.

**HRMS** (ESI-TOF) calcd for  $\text{C}_{39}\text{H}_{28}\text{FNO}_3^+$  ( $[\text{M}]+\text{H}^+$ ) = 578.2126, found 578.2128.

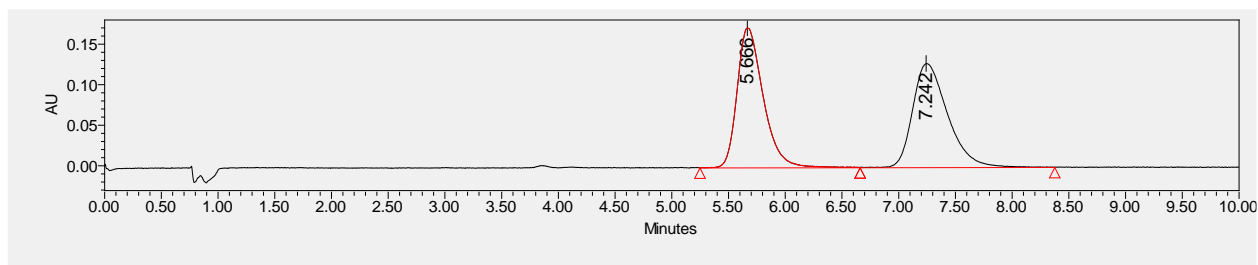

|   | Retention Time | Area    | % Area |
|---|----------------|---------|--------|
| 1 | 5.666          | 2771112 | 50.10  |
| 2 | 7.242          | 2760374 | 49.90  |

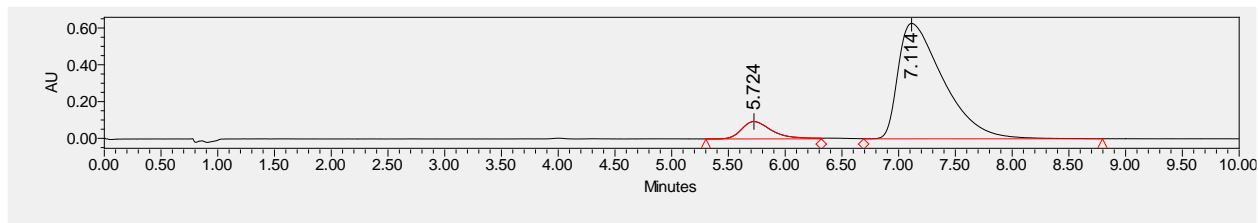

|   | Retention Time | Area     | % Area |
|---|----------------|----------|--------|
| 1 | 5.724          | 1763982  | 9.22   |
| 2 | 7.114          | 17366612 | 90.78  |

***N*-((3*S*,4*S*)-3-benzyl-5-((4-chlorophenyl)ethynyl)-2-oxo-4,6-diphenyl-3,4-dihydro-2*H*-pyran-3-yl)benzamide (D11)**

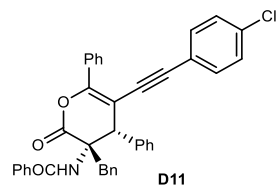

48.1 mg, 81% yield; white solid, melting point: 93.5 – 96.7 °C,  $[\alpha]_D^{19} = 36.9$  ( $c = 0.80$ ,  $\text{CH}_2\text{Cl}_2$ ).

Dissolved in *i*PrOH for SFC; SFC (Daicel chiralcel IA-3,  $\text{CO}_2/\text{MeOH} = 85/15$ , flow rate = 1.5 mL/min,  $\lambda = 254$  nm) retention time:  $t_{\text{major}} = 13.98$  min,  $t_{\text{minor}} = 9.65$  min. er = 93:7. dr >19:1.

<sup>1</sup>H NMR (400 MHz,  $\text{CDCl}_3$ )  $\delta$  8.24 – 8.20 (m, 2H), 7.59 – 7.46 (m, 3H), 7.48 – 7.17 (m, 17H), 7.14 – 7.09 (m, 2H), 6.63 (s, 1H), 5.16 (s, 1H), 4.36 (d,  $J = 12.0$  Hz, 1H), 3.58 (d,  $J = 12.0$  Hz, 1H).

<sup>13</sup>C NMR (101 MHz,  $\text{CDCl}_3$ )  $\delta$  168.1, 167.9, 152.3, 136.2, 135.1, 134.8, 134.8, 132.7, 131.7, 131.4, 130.6, 130.1, 129.0, 128.9, 128.7, 128.6, 128.5, 128.3, 128.2, 127.7, 127.6, 126.8, 121.4, 102.5, 95.3, 87.3, 64.7, 52.5, 38.6.

IR (neat):  $\nu(\text{cm}^{-1})$ : 3417, 3030, 1770, 1667, 1486, 1083, 749, 525.

HRMS (ESI-TOF) calcd for  $\text{C}_{39}\text{H}_{28}\text{ClNO}_3^+$  ( $[\text{M}]+\text{Na}^+$ ) = 616.1650, 617.1683, found 616.1653, 617.1682.



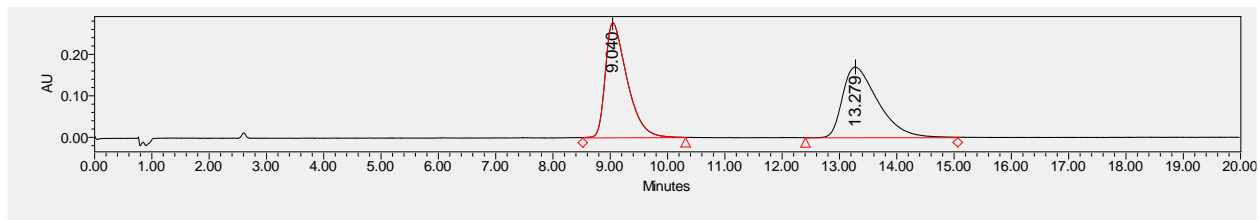

|   | Retention Time | Area    | % Area |
|---|----------------|---------|--------|
| 1 | 9.040          | 7325228 | 49.91  |
| 2 | 13.279         | 7351792 | 50.09  |

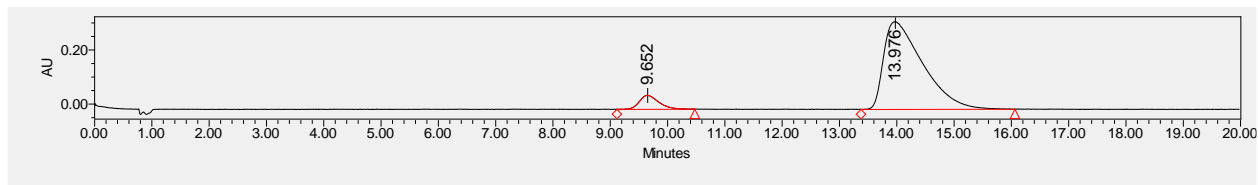

|   | Retention Time | Area     | % Area |
|---|----------------|----------|--------|
| 1 | 9.652          | 1236713  | 7.43   |
| 2 | 13.976         | 15407674 | 92.57  |

***N*-((3*S*,4*S*)-3-benzyl-5-((4-bromophenyl)ethynyl)-2-oxo-4,6-diphenyl-3,4-dihydro-2*H*-pyran-3-yl)benzamide (D12)**

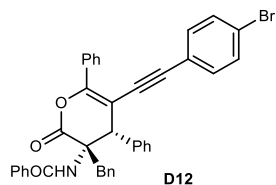

53.0 mg, 83% yield; white solid, melting point: 184.3 – 187.9 °C,  $[\alpha]_D^{19} = 24.3$  ( $c = 0.92$ ,  $\text{CH}_2\text{Cl}_2$ ).

Dissolved in *i*PrOH for SFC; SFC (Daicel chiralcel IA-3,  $\text{CO}_2/\text{MeOH} = 85/15$ , flow rate = 1.5 mL/min,  $\lambda = 254$  nm) retention time:  $t_{\text{major}} = 18.33$  min,  $t_{\text{minor}} = 11.99$  min. er = 91:9. dr >19:1.

**$^1\text{H NMR}$**  (400 MHz,  $\text{CDCl}_3$ )  $\delta$  8.23 – 8.20 (m, 2H), 7.59 – 7.46 (m, 3H), 7.47 – 7.34 (m, 5H), 7.36 – 7.27 (m, 4H), 7.28 – 7.17 (m, 8H), 7.13 – 7.09 (m, 2H), 6.63 (s, 1H), 5.15 (s, 1H), 4.36 (d,  $J = 12.0$  Hz, 1H), 3.57 (d,  $J = 12.0$  Hz, 1H).

**$^{13}\text{C NMR}$**  (101 MHz,  $\text{CDCl}_3$ )  $\delta$  168.1, 167.9, 152.3, 136.2, 135.1, 134.8, 132.9, 131.8, 131.7, 131.4, 130.6, 130.1, 129.0, 128.7, 128.6, 128.5, 128.3, 128.2, 127.7, 127.6, 126.8, 123.1, 121.8, 102.5, 95.4, 87.5, 64.7, 52.5, 38.6.

IR (neat):  $\nu(\text{cm}^{-1})$ : 3416, 3030, 1768, 1664, 1483, 1163, 695, 523.

HRMS (ESI-TOF) calcd for  $\text{C}_{39}\text{H}_{28}\text{BrNO}_3^+$  ( $[\text{M}+\text{H}^+]$ ) = 638.1325, 640.1305, found 638.1323, 640.1305.

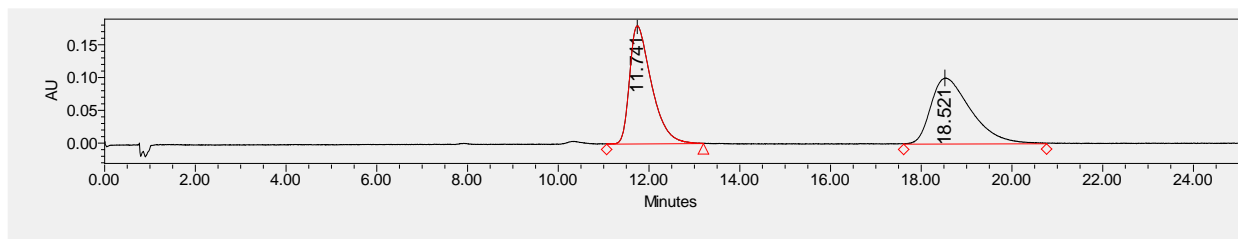

|   | Retention Time | Area    | % Area |
|---|----------------|---------|--------|
| 1 | 11.741         | 6057230 | 49.41  |
| 2 | 18.521         | 6201365 | 50.59  |

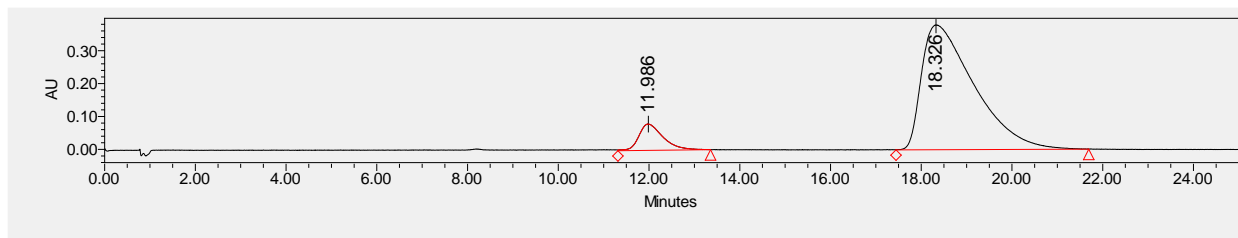

|   | Retention Time | Area     | % Area |
|---|----------------|----------|--------|
| 1 | 11.986         | 2973587  | 8.90   |
| 2 | 18.326         | 30455381 | 91.10  |

*N*-((3*S*,4*S*)-3-benzyl-5-((4-nitrophenyl)ethynyl)-2-oxo-4,6-diphenyl-3,4-dihydro-2*H*-pyran-3-yl)benzamide (D13)

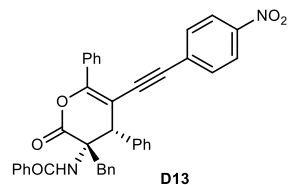

30.8 mg, 51% yield; yellow solid, melting point: 102.9 – 106.3 °C,  $[\alpha]_{\text{D}}^{19} = 11.1$  ( $c = 0.41$ ,  $\text{CH}_2\text{Cl}_2$ ).

Dissolved in *i*PrOH for SFC; SFC (Daicel chiralcel IA-3,  $\text{CO}_2/\text{MeOH} = 85/15$ , flow rate = 1.5 mL/min,  $\lambda = 254$  nm) retention time:  $t_{\text{major}} = 20.47$  min,  $t_{\text{minor}} = 15.42$  min. er = 82:18. dr >19:1.

**<sup>1</sup>H NMR** (400 MHz, CDCl<sub>3</sub>) δ 8.23 – 8.13 (m, 4H), 7.61 – 7.53 (m, 3H), 7.51 – 7.18 (m, 15H), 7.15 – 7.08 (m, 2H), 6.62 (s, 1H), 5.19 (s, 1H), 4.37 (d, *J* = 16.0 Hz, 1H), 3.57 (d, *J* = 12.0 Hz, 1H).

**<sup>13</sup>C NMR** (101 MHz, CDCl<sub>3</sub>) δ 168.2, 167.7, 153.8, 147.2, 136.0, 135.0, 134.6, 132.1, 131.8, 131.2, 131.0, 130.1, 129.7, 129.1, 128.7, 128.6, 128.6, 128.5, 128.2, 127.9, 127.7, 126.8, 123.8, 101.9, 94.1, 91.7, 64.8, 52.3, 38.7.

**IR** (neat):  $\nu$ (cm<sup>-1</sup>): 3417, 2925, 1771, 1665, 1515, 1261, 696, 571.

**HRMS** (ESI-TOF) calcd for C<sub>39</sub>H<sub>28</sub>N<sub>2</sub>O<sub>5</sub><sup>+</sup> ([M]+H<sup>+</sup>) = 605.2071, found 605.2069.

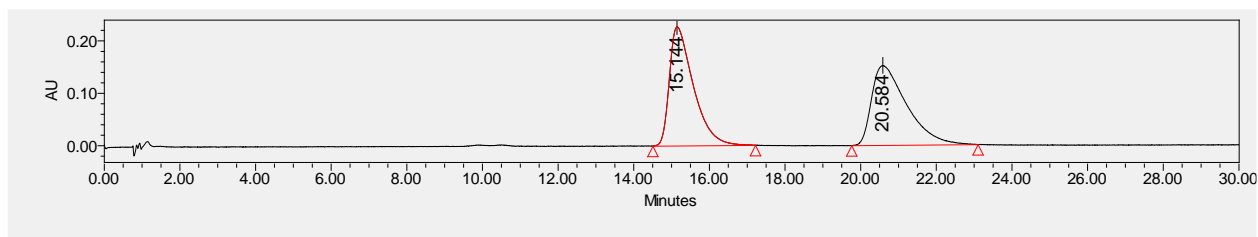

|   | Retention Time | Area     | % Area |
|---|----------------|----------|--------|
| 1 | 15.144         | 10026844 | 50.43  |
| 2 | 20.584         | 9857065  | 49.57  |

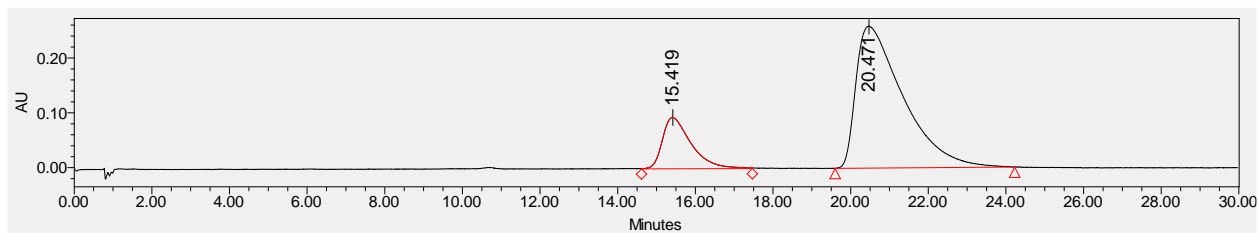

|   | Retention Time | Area     | % Area |
|---|----------------|----------|--------|
| 1 | 15.419         | 4815553  | 18.11  |
| 2 | 20.471         | 21772688 | 81.89  |

***N*-((3*S*,4*S*)-3-benzyl-2-oxo-4,6-diphenyl-5-(thiophen-3-ylethynyl)-3,4-dihydro-2H-pyran-3-yl)benzamide (D14)**

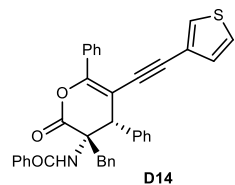

45.2 mg, 80% yield; pale yellow solid, melting point: 155.9 – 159.1 °C,  $[\alpha]_D^{18} = 52.7$  ( $c = 0.66$ ,  $\text{CH}_2\text{Cl}_2$ ).

Dissolved in *i*PrOH for SFC; SFC (Daicel chiralcel IA-3,  $\text{CO}_2/\text{MeOH} = 85/15$ , flow rate = 1.5 mL/min,  $\lambda = 254$  nm) retention time:  $t_{\text{major}} = 10.73$  min,  $t_{\text{minor}} = 8.23$  min. er = 92:8. dr >19:1.

$^1\text{H NMR}$  (400 MHz,  $\text{CDCl}_3$ )  $\delta$  8.26 – 8.21 (m, 2H), 7.58 – 7.44 (m, 3H), 7.47 – 7.27 (m, 8H), 7.28 – 7.17 (m, 7H), 7.15 – 7.02 (m, 3H), 6.62 (s, 1H), 5.15 (s, 1H), 4.35 (d,  $J = 12.0$  Hz, 1H), 3.58 (d,  $J = 16.0$  Hz, 1H).

$^{13}\text{C NMR}$  (101 MHz,  $\text{CDCl}_3$ )  $\delta$  168.1, 168.0, 151.8, 136.3, 135.2, 134.9, 131.7, 131.4, 130.4, 130.1, 129.6, 129.2, 128.9, 128.7, 128.6, 128.5, 128.3, 127.6, 127.6, 126.8, 125.7, 122.0, 102.7, 91.9, 85.8, 64.8, 52.5, 38.5.

**IR** (neat):  $\nu(\text{cm}^{-1})$ : 3416, 3030, 1771, 1665, 1512, 1166, 696, 552.

**HRMS** (ESI-TOF) calcd for  $\text{C}_{37}\text{H}_{27}\text{NO}_3\text{S}^+$  ( $[\text{M}]+\text{H}^+$ ) = 566.1784, found 566.1784.

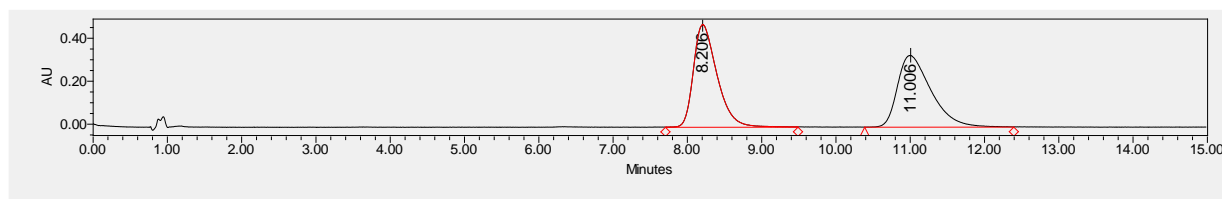

|   | Retention Time | Area     | % Area |
|---|----------------|----------|--------|
| 1 | 8.206          | 10579726 | 50.23  |
| 2 | 11.006         | 10481918 | 49.77  |

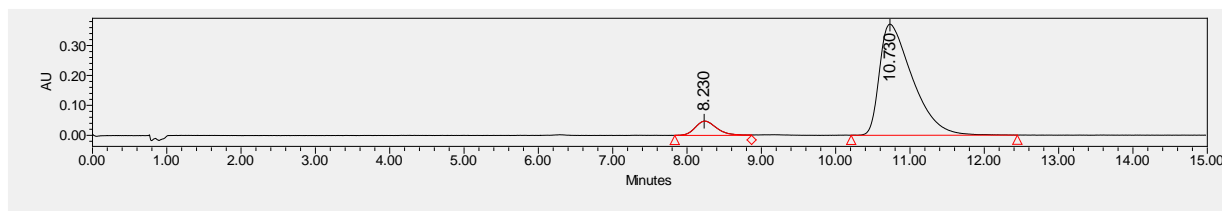

|   | Retention Time | Area     | % Area |
|---|----------------|----------|--------|
| 1 | 8.230          | 970843   | 7.83   |
| 2 | 10.730         | 11431362 | 92.17  |

***N*-((3*S*,4*S*)-3-benzyl-5-(naphthalen-1-ylethynyl)-2-oxo-4,6-diphenyl-3,4-dihydro-2H-pyran-3-yl)benzamide (D15)**

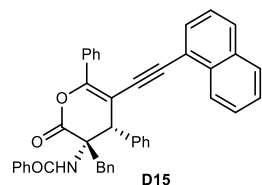

51.8 mg, 85% yield; pale yellow solid, melting point: 88.5 – 91.4 °C,  $[\alpha]_D^{19} = 7.7$  ( $c = 0.88$ ,  $\text{CH}_2\text{Cl}_2$ ).

Dissolved in *i*PrOH for SFC; SFC (Daicel chiralcel IC-3,  $\text{CO}_2/\text{IPROH} = 80/20$ , flow rate = 1.0 mL/min,  $\lambda = 254$  nm) retention time:  $t_{\text{major}} = 10.70$  min,  $t_{\text{minor}} = 8.13$  min. er = 83:17. dr >19:1.

$^1\text{H NMR}$  (400 MHz,  $\text{CDCl}_3$ )  $\delta$  8.33 – 8.30 (m, 2H), 8.04 – 7.97 (m, 1H), 7.82 – 7.77 (m, 2H), 7.62 – 7.49 (m, 4H), 7.52 – 7.34 (m, 8H), 7.36 – 7.11 (m, 10H), 6.69 (s, 1H), 5.29 (s, 1H), 4.42 (d,  $J = 16.0$  Hz, 1H), 3.66 (d,  $J = 16.0$  Hz, 1H).

$^{13}\text{C NMR}$  (101 MHz,  $\text{CDCl}_3$ )  $\delta$  168.1, 168.0, 151.9, 136.6, 135.1, 134.8, 133.2, 133.0, 131.7, 131.6, 130.5, 130.1, 129.2, 129.0, 128.7, 128.6, 128.3, 127.9, 127.6, 126.9, 126.8, 126.6, 126.2, 125.3, 120.5, 103.1, 95.0, 91.0, 64.8, 53.1, 38.8.

**IR** (neat):  $\nu(\text{cm}^{-1})$ : 3417, 3060, 1769, 1666, 1511, 1167, 752, 550.

**HRMS** (ESI-TOF) calcd for  $\text{C}_{43}\text{H}_{31}\text{NO}_3^+$  ( $[\text{M}]+\text{Na}^+$ ) = 632.2196, found 632.2197.

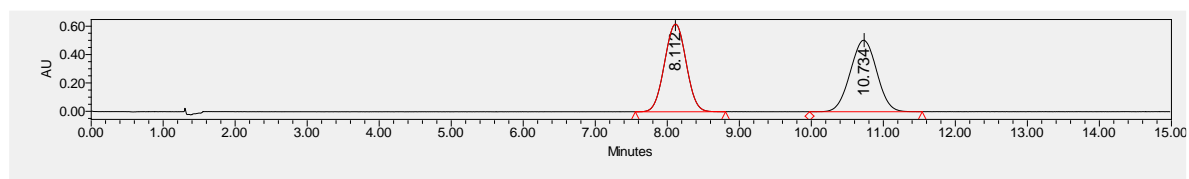

|   | Retention Time | Area     | % Area |
|---|----------------|----------|--------|
| 1 | 8.112          | 12834441 | 49.89  |
| 2 | 10.734         | 12890277 | 50.11  |

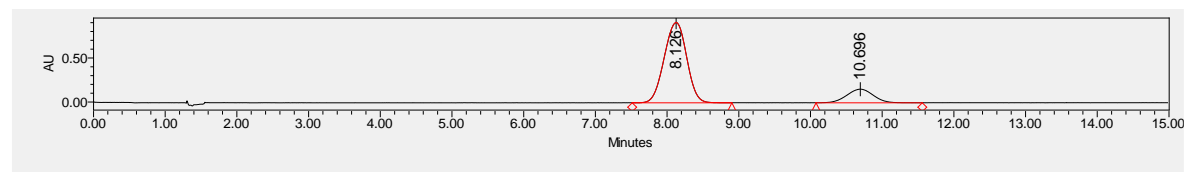

|   | Retention Time | Area     | % Area |
|---|----------------|----------|--------|
| 1 | 8.126          | 19770001 | 83.36  |
| 2 | 10.696         | 3945164  | 16.64  |

***N*-((3*S*,4*S*)-3-benzyl-4-(4-fluorophenyl)-5-((4-fluorophenyl)ethynyl)-2-oxo-6-phenyl-3,4-dihydro-2*H*-pyran-3-yl)benzamide (D16)**

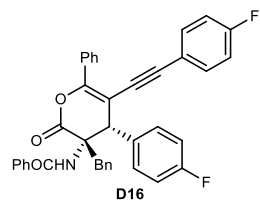

58.3 mg, 98% yield; white solid, melting point: 92.4 – 96.8 °C,  $[\alpha]_D^{20} = 47.3$  ( $c = 0.90$ ,  $\text{CH}_2\text{Cl}_2$ ).

Dissolved in *i*PrOH for SFC; SFC (Daicel chiralcel IA-3,  $\text{CO}_2/\text{MeOH} = 85/15$ , flow rate = 1.5 mL/min,  $\lambda = 254$  nm) retention time:  $t_{\text{major}} = 5.22$  min,  $t_{\text{minor}} = 4.19$  min. er = 90:10. dr >19:1.

**$^1\text{H}$  NMR** (400 MHz,  $\text{CDCl}_3$ )  $\delta$  8.26 – 8.19 (m, 2H), 7.59 – 7.38 (m, 6H), 7.39 – 7.26 (m, 6H), 7.25 – 7.20 (m, 3H), 7.13 – 7.09 (m, 2H), 7.05 – 6.88 (m, 4H), 6.67 (s, 1H), 5.16 (s, 1H), 4.32 (d,  $J = 16.0$  Hz, 1H), 3.57 (d,  $J = 12.0$  Hz, 1H).

**$^{13}\text{C}$  NMR** (101 MHz,  $\text{CDCl}_3$ )  $\delta$  168.0, 167.8, 164.0 (d,  $J = 250.0$  Hz), 161.5 (d,  $J = 240.0$  Hz), 152.0, 134.9, 134.7, 133.5, 133.4, 132.1 (d,  $J = 3.3$  Hz), 131.9, 131.3, 130.6, 130.1, 130.0, 129.9, 128.8, 128.6, 128.5, 127.7, 126.7, 118.9 (d,  $J = 3.6$  Hz), 115.9 (d,  $J = 22.1$  Hz), 102.5, 95.6, 85.8, 64.8, 51.8, 38.6.

**$^{19}\text{F}$  NMR** (376 MHz,  $\text{CDCl}_3$ )  $\delta$  -109.76, -113.64.

**IR** (neat):  $\nu(\text{cm}^{-1})$ : 3415, 2925, 1768, 1664, 1511, 1157, 694, 528.

**HRMS** (ESI-TOF) calcd for  $\text{C}_{39}\text{H}_{27}\text{F}_2\text{NO}_3^+$  ( $[\text{M}+\text{H}^+]$ ) = 596.2032, found 596.2032.

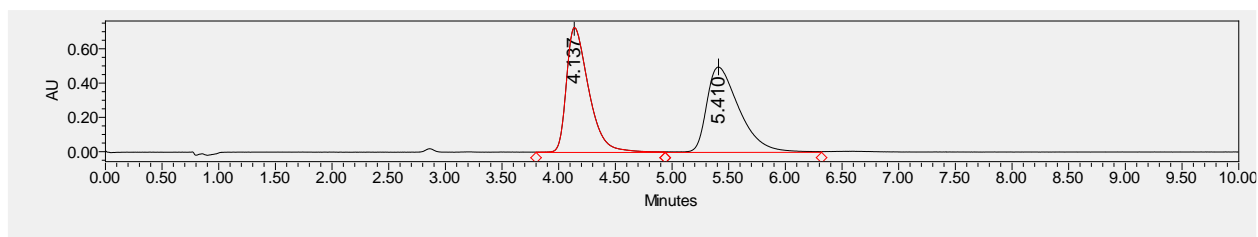

|   | Retention Time | Area    | % Area |
|---|----------------|---------|--------|
| 1 | 4.137          | 9988864 | 50.09  |
| 2 | 5.410          | 9952668 | 49.91  |

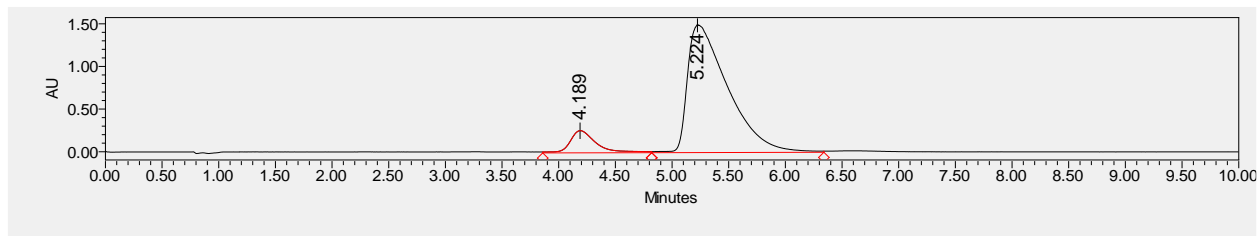

|   | Retention Time | Area     | % Area |
|---|----------------|----------|--------|
| 1 | 4.189          | 4154213  | 10.08  |
| 2 | 5.224          | 37072869 | 89.92  |

***N*-((3*S*,4*S*)-3-(4-methoxybenzyl)-2-oxo-4,6-diphenyl-5-(phenylethynyl)-3,4-dihydro-2*H*-pyran-3-yl)benzamide (D17)**

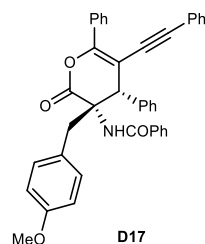

40.0 mg, 68% yield; white solid, melting point: 88.4 – 92.3 °C,  $[\alpha]_D^{21} = 61.2$  ( $c = 0.64$ ,  $\text{CH}_2\text{Cl}_2$ ).

Dissolved in *i*PrOH for SFC; SFC (Daicel chiralcel IA-3,  $\text{CO}_2/\text{MeOH} = 85/15$ , flow rate = 1.5 mL/min,  $\lambda = 254$  nm) retention time:  $t_{\text{major}} = 11.02$  min,  $t_{\text{minor}} = 8.41$  min. er = 94:6. dr >19:1.

**<sup>1</sup>H NMR** (400 MHz,  $\text{CDCl}_3$ )  $\delta$  8.27 – 8.22 (m, 2H), 7.59 – 7.45 (m, 3H), 7.48 – 7.26 (m, 12H), 7.28 – 7.16 (m, 3H), 7.06 – 7.01 (m, 2H), 6.79 – 6.73 (m, 2H), 6.64 (s, 1H), 5.13 (s, 1H), 4.29 (d,  $J = 12.0$  Hz, 1H), 3.73 (s, 3H), 3.54 (d,  $J = 12.0$  Hz, 1H).

**<sup>13</sup>C NMR** (101 MHz,  $\text{CDCl}_3$ )  $\delta$  168.1, 168.0, 159.0, 151.9, 136.5, 135.2, 131.7, 131.5, 131.2, 130.4, 129.0, 128.9, 128.7, 128.7, 128.5, 128.5, 128.3, 128.2, 127.7, 126.9, 126.8, 123.0, 114.0, 102.8, 96.6, 86.4, 64.9, 55.3, 52.6, 37.8.

**IR** (neat):  $\nu(\text{cm}^{-1})$ : 3418, 2930, 1768, 1666, 1512, 1252, 753, 527.

**HRMS** (ESI-TOF) calcd for  $\text{C}_{40}\text{H}_{31}\text{NO}_4^+$  ( $[\text{M}]+\text{H}^+$ ) = 590.2326, found 590.2328.

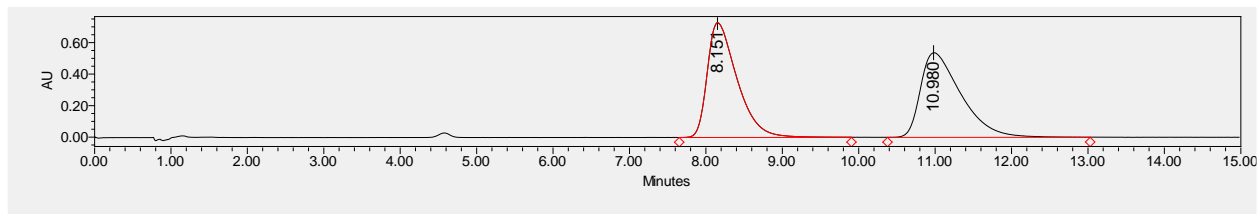

|   | Retention Time | Area     | % Area |
|---|----------------|----------|--------|
| 1 | 8.151          | 19768584 | 50.00  |
| 2 | 10.980         | 19768479 | 50.00  |

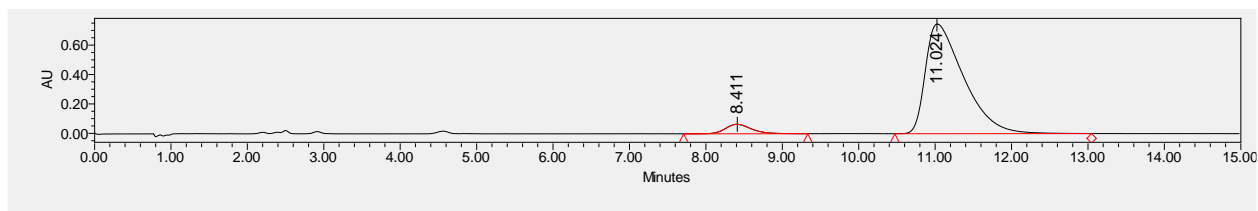

|   | Retention Time | Area     | % Area |
|---|----------------|----------|--------|
| 1 | 8.411          | 1547903  | 5.61   |
| 2 | 11.024         | 26034472 | 94.39  |

***N*-((3*S*,4*S*)-3-(4-chlorobenzyl)-2-oxo-4,6-diphenyl-5-(phenylethynyl)-3,4-dihydro-2*H*-pyran-3-yl)benzamide (D18)**

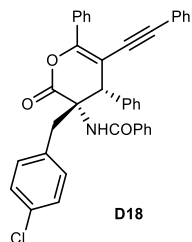

50.5 mg, 85% yield; white solid, melting point: 99.2 – 102.9 °C,  $[\alpha]_D^{20} = 63.2$  ( $c = 0.88$ ,  $\text{CH}_2\text{Cl}_2$ ).

Dissolved in *i*PrOH for SFC; SFC (Daicel chiralcel IA-3,  $\text{CO}_2/\text{IPROH} = 80/20$ , flow rate = 1.5 mL/min,  $\lambda = 254$  nm) retention time:  $t_{\text{major}} = 12.27$  min,  $t_{\text{minor}} = 5.97$  min. er = 91:9. dr >19:1.

$^1\text{H NMR}$  (400 MHz,  $\text{CDCl}_3$ )  $\delta$  8.27 – 8.22 (m, 2H), 7.59 – 7.46 (m, 3H), 7.49 – 7.15 (m, 17H), 7.07 – 7.02 (m, 2H), 6.62 (s, 1H), 5.14 (s, 1H), 4.35 (d,  $J = 16.0$  Hz, 1H), 3.56 (d,  $J = 16.0$  Hz, 1H).



$^{13}\text{C}$  NMR (101 MHz,  $\text{CDCl}_3$ )  $\delta$  168.1, 167.9, 151.8, 136.2, 134.9, 133.6, 133.3, 131.9, 131.5, 131.4, 131.3, 130.5, 129.0, 128.8, 128.8, 128.5, 128.4, 128.2, 127.7, 126.7, 122.8, 102.7, 96.8, 86.2, 64.6, 52.6, 38.0.

IR (neat):  $\nu(\text{cm}^{-1})$ : 3415, 3061, 1767, 1665, 1486, 1162, 691, 528.

HRMS (ESI-TOF) calcd for  $\text{C}_{39}\text{H}_{28}\text{ClNO}_3^+$  ( $[\text{M}]+\text{Na}^+$ ) = 616.1650, 617.1683, found 616.1658, 617.1694.

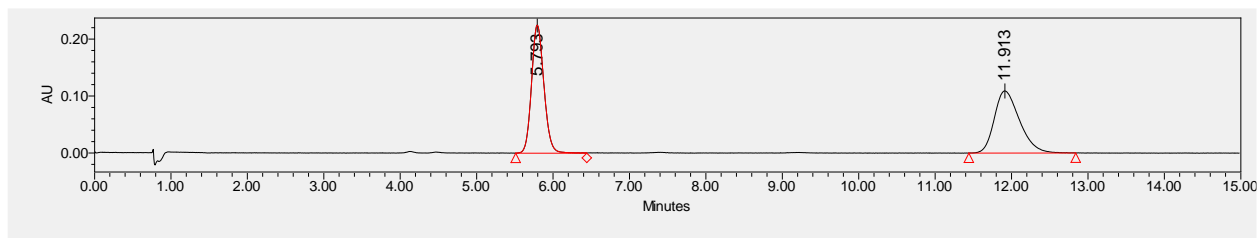

|   | Retention Time | Area    | % Area |
|---|----------------|---------|--------|
| 1 | 5.793          | 2530728 | 50.28  |
| 2 | 11.913         | 2502913 | 49.72  |

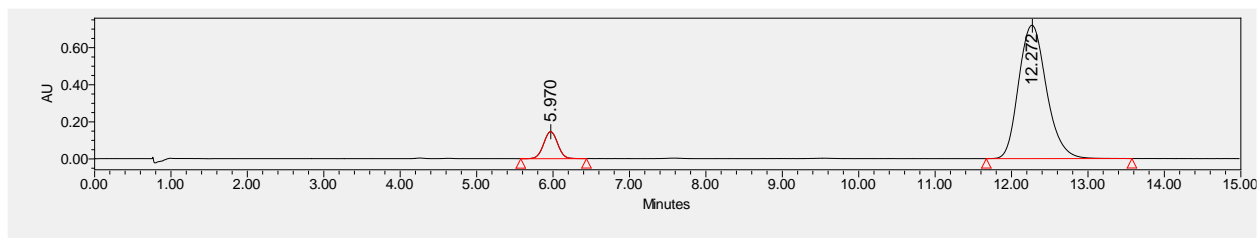

|   | Retention Time | Area     | % Area |
|---|----------------|----------|--------|
| 1 | 5.970          | 1856190  | 9.27   |
| 2 | 12.272         | 18169076 | 90.73  |

*N*-((3*S*,4*S*)-3-(4-bromobenzyl)-2-oxo-4,6-diphenyl-5-(phenylethynyl)-3,4-dihydro-2*H*-pyran-3-yl)benzamide (D19)

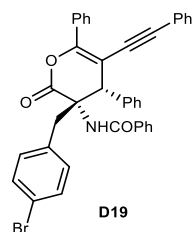

58.7 mg, 92% yield; pale yellow solid, melting point: 102.3 – 105.7 °C,  $[\alpha]_D^{20} = 61.1$  ( $c = 0.93$ ,  $\text{CH}_2\text{Cl}_2$ ).

Dissolved in *i*PrOH for SFC; SFC (Daicel chiralcel IA-3,  $\text{CO}_2/\text{MeOH} = 85/15$ , flow rate = 1.5 mL/min,  $\lambda = 254$  nm) retention time:  $t_{\text{major}} = 14.72$  min,  $t_{\text{minor}} = 8.37$  min. er = 89:11. dr >19:1.

$^1\text{H NMR}$  (400 MHz,  $\text{CDCl}_3$ )  $\delta$  8.28 – 8.20 (m, 2H), 7.59 – 7.45 (m, 3H), 7.49 – 7.25 (m, 14H), 7.26 – 7.16 (m, 3H), 7.01 – 6.96 (m, 2H), 6.62 (s, 1H), 5.14 (s, 1H), 4.34 (d,  $J = 12.0$  Hz, 1H), 3.54 (d,  $J = 12.0$  Hz, 1H).

$^{13}\text{C NMR}$  (101 MHz,  $\text{CDCl}_3$ )  $\delta$  168.1, 167.8, 151.8, 136.1, 134.9, 133.9, 131.9, 131.8, 131.7, 131.5, 131.3, 130.5, 129.0, 128.8, 128.8, 128.5, 128.4, 128.2, 127.7, 126.7, 122.8, 121.8, 102.7, 96.8, 86.2, 64.5, 52.6, 38.1.

**IR** (neat):  $\nu(\text{cm}^{-1})$ : 3416, 3061, 1767, 1665, 1486, 1163, 692, 527.

**HRMS** (ESI-TOF) calcd for  $\text{C}_{39}\text{H}_{28}\text{BrNO}_3^+$  ( $[\text{M}+\text{H}^+]$ ) = 638.1325, 640.1305, found 638.1321, 640.1307.

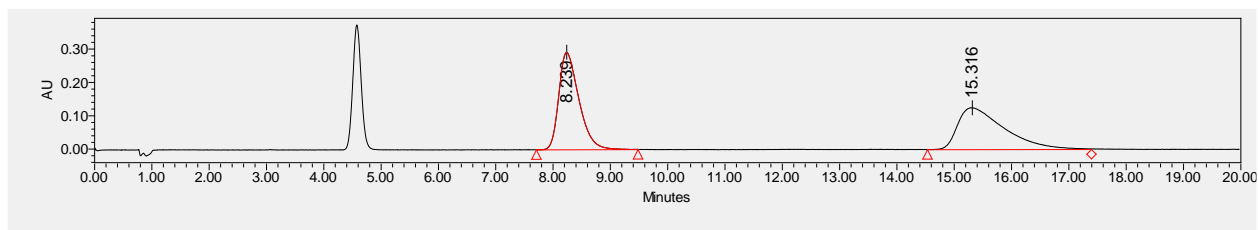

|   | Retention Time | Area    | % Area |
|---|----------------|---------|--------|
| 1 | 8.239          | 7154132 | 49.98  |
| 2 | 15.316         | 7158787 | 50.02  |

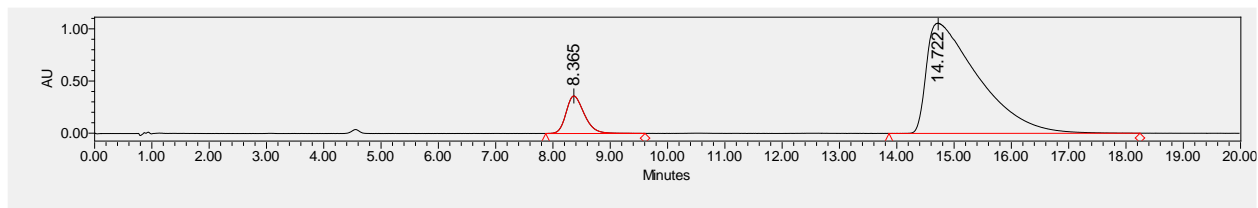

|   | Retention Time | Area     | % Area |
|---|----------------|----------|--------|
| 1 | 8.365          | 7946904  | 10.66  |
| 2 | 14.722         | 66621256 | 89.34  |

***N*-((3*S*,4*S*)-2-oxo-4,6-diphenyl-5-(phenylethynyl)-3-(thiophen-2-ylmethyl)-3,4-dihydro-2H-pyran-3-yl)benzamide (D20)**

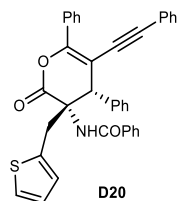

45.2 mg, 80% yield; pale yellow solid, melting point: 97.4 – 100.5 °C,  $[\alpha]_D^{20} = 71.4$  ( $c = 0.75$ ,  $\text{CH}_2\text{Cl}_2$ ).

Dissolved in *i*PrOH for SFC; SFC (Daicel chiralcel IC-3,  $\text{CO}_2/\text{IPROH} = 85/15$ , flow rate = 1.5 mL/min,  $\lambda = 254$  nm) retention time:  $t_{\text{major}} = 4.93$  min,  $t_{\text{minor}} = 6.57$  min. er = 89:11. dr >19:1.

$^1\text{H NMR}$  (400 MHz,  $\text{CDCl}_3$ )  $\delta$  8.25 – 8.20 (m, 2H), 7.58 – 7.40 (m, 6H), 7.40 – 7.17 (m, 12H), 7.17 – 7.11 (m, 1H), 6.91 – 6.88 (m, 1H), 6.83 – 6.80 (m, 2H), 5.12 (s, 1H), 4.63 (d,  $J = 16.0$  Hz, 1H), 3.85 (d,  $J = 12.0$  Hz, 1H).

$^{13}\text{C NMR}$  (101 MHz,  $\text{CDCl}_3$ )  $\delta$  168.0, 167.6, 152.1, 136.1, 135.0, 131.8, 131.5, 131.4, 130.4, 129.0, 128.8, 128.7, 128.5, 128.5, 128.3, 128.3, 127.7, 127.0, 126.9, 125.6, 122.9, 102.4, 96.6, 86.2, 64.8, 52.2, 32.8.

**IR** (neat):  $\nu(\text{cm}^{-1})$ : 3417, 3062, 1767, 1666, 1485, 1145, 692, 527.

**HRMS** (ESI-TOF) calcd for  $\text{C}_{37}\text{H}_{27}\text{SNO}_3^+$  ( $[\text{M}]+\text{H}^+$ ) = 566.1784, found 566.1788.

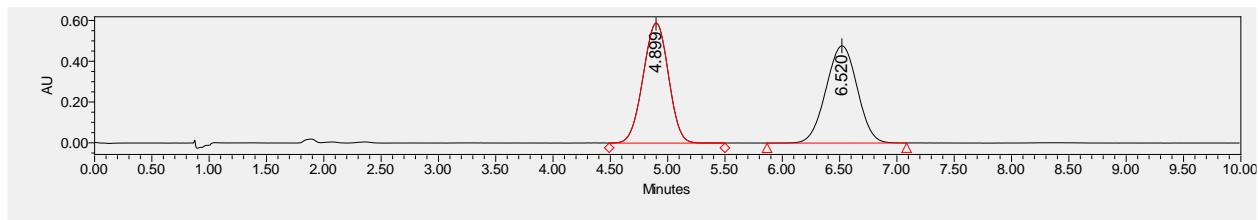

|   | Retention Time | Area    | % Area |
|---|----------------|---------|--------|
| 1 | 4.899          | 9038233 | 49.99  |
| 2 | 6.520          | 9040820 | 50.01  |

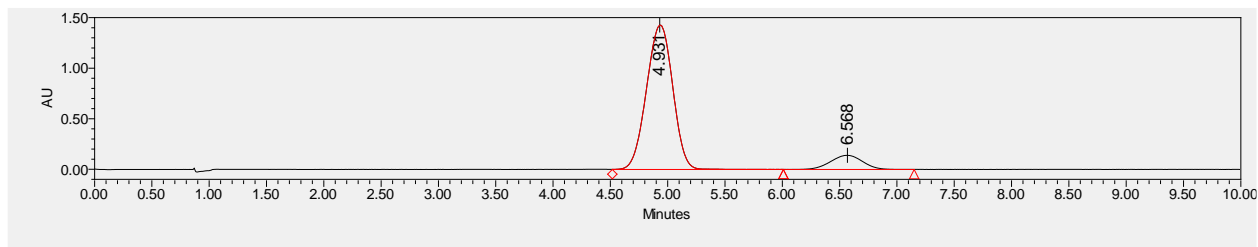

|   | Retention Time | Area     | % Area |
|---|----------------|----------|--------|
| 1 | 4.931          | 22713108 | 89.37  |
| 2 | 6.568          | 2700279  | 10.63  |

***N*-((3*S*,4*S*)-3-(naphthalen-2-ylmethyl)-2-oxo-4,6-diphenyl-5-(phenylethynyl)-3,4-dihydro-2*H*-pyran-3-yl)benzamide (D21)**

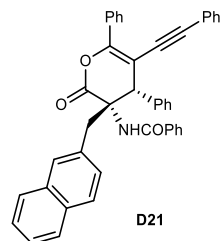

43.3 mg, 71% yield; pale yellow solid, melting point: 95.1 – 97.2 °C,  $[\alpha]_D^{20} = 64.7$  ( $c = 0.78$ ,  $\text{CH}_2\text{Cl}_2$ ).

Dissolved in *i*PrOH for SFC; SFC (Daicel chiralcel IC-3,  $\text{CO}_2/\text{IPROH} = 85/15$ , flow rate = 1.5 mL/min,  $\lambda = 254$  nm) retention time:  $t_{\text{major}} = 8.03$  min,  $t_{\text{minor}} = 10.81$  min. er = 79:21. dr >19:1.

$^1\text{H NMR}$  (400 MHz,  $\text{CDCl}_3$ )  $\delta$  8.32 – 8.26 (m, 2H), 7.80 – 7.62 (m, 3H), 7.61 – 7.48 (m, 4H), 7.46 – 7.26 (m, 14H), 7.28 – 7.17 (m, 4H), 6.64 (s, 1H), 5.22 (s, 1H), 4.52 (d,  $J = 12.0$  Hz, 1H), 3.76 (d,  $J = 16.0$  Hz, 1H).

$^{13}\text{C NMR}$  (101 MHz,  $\text{CDCl}_3$ )  $\delta$  168.3, 168.0, 151.9, 136.4, 135.2, 133.4, 132.8, 132.4, 131.7, 131.5, 131.5, 130.5, 129.3, 129.0, 128.8, 128.7, 128.5, 128.3, 128.2, 128.0, 127.9, 127.8, 127.8, 126.8, 126.2, 126.0, 123.0, 102.8, 96.7, 86.4, 64.8, 52.7, 38.8.

**IR** (neat):  $\nu(\text{cm}^{-1})$ : 3415, 3058, 1767, 1665, 1511, 1167, 692, 531.

**HRMS** (ESI-TOF) calcd for  $\text{C}_{43}\text{H}_{31}\text{NO}_3^+$  ( $[\text{M}+\text{H}^+]$ ) = 610.2377, found 610.2375.

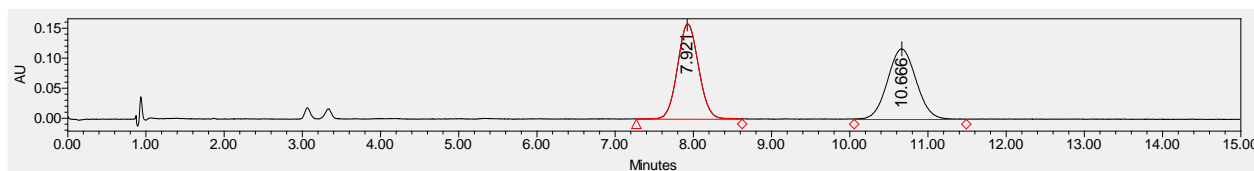

|   | Retention Time | Area    | % Area |
|---|----------------|---------|--------|
| 1 | 7.921          | 2998018 | 49.89  |
| 2 | 10.666         | 3011120 | 50.11  |

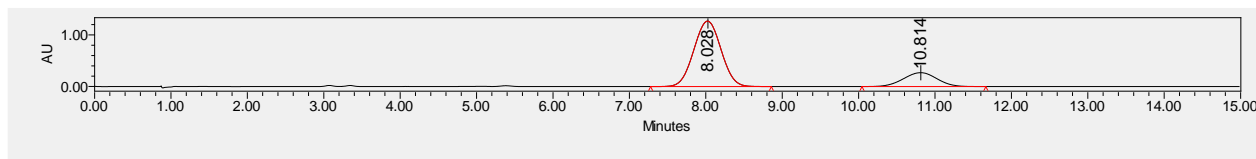

|   | Retention Time | Area     | % Area |
|---|----------------|----------|--------|
| 1 | 8.028          | 31468123 | 79.19  |
| 2 | 10.814         | 8271116  | 20.81  |

***N*-((3*S*,4*S*)-3-methyl-2-oxo-4,6-diphenyl-5-(phenylethynyl)-3,4-dihydro-2H-pyran-3-yl)benzamide (D22)**

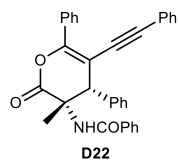

33.3 mg, 69% yield; white solid, melting point: 72.9 – 75.3 °C,  $[\alpha]_D^{19} = -67.0$  ( $c = 0.61$ ,  $\text{CH}_2\text{Cl}_2$ ).

Dissolved in *i*PrOH for SFC; SFC (Daicel chiralcel IA-3,  $\text{CO}_2/\text{MeOH} = 85/15$ , flow rate = 1.5 mL/min,  $\lambda = 254$  nm) retention time:  $t_{\text{major}} = 4.03$  min,  $t_{\text{minor}} = 4.62$  min. er = 70:30. dr >19:1.

$^1\text{H NMR}$  (400 MHz,  $\text{CDCl}_3$ )  $\delta$  8.19 – 8.14 (m, 2H), 7.54 – 7.41 (m, 6H), 7.40 – 7.29 (m, 4H), 7.33 – 7.16 (m, 8H), 6.99 (s, 1H), 4.99 (s, 1H), 2.15 (s, 3H).

$^{13}\text{C NMR}$  (101 MHz,  $\text{CDCl}_3$ )  $\delta$  170.2, 167.4, 152.0, 136.5, 134.9, 131.7, 131.5, 131.4, 130.3, 129.0, 128.7, 128.7, 128.5, 128.4, 128.2, 128.0, 127.7, 126.9, 122.9, 102.8, 96.5, 86.3, 59.4, 52.3, 22.1.

**IR** (neat):  $\nu(\text{cm}^{-1})$ : 3419, 3061, 1767, 1666, 1513, 1093, 692, 529.

**HRMS** (ESI-TOF) calcd for  $\text{C}_{33}\text{H}_{25}\text{NO}_3^+$  ( $[\text{M}+\text{H}^+]$ ) = 484.1907, found 484.1911.

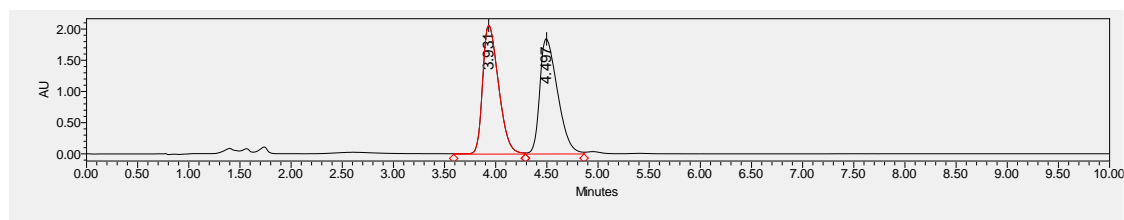

|   | Retention Time | Area     | % Area |
|---|----------------|----------|--------|
| 1 | 3.931          | 22301486 | 49.93  |
| 2 | 4.497          | 22364139 | 50.07  |

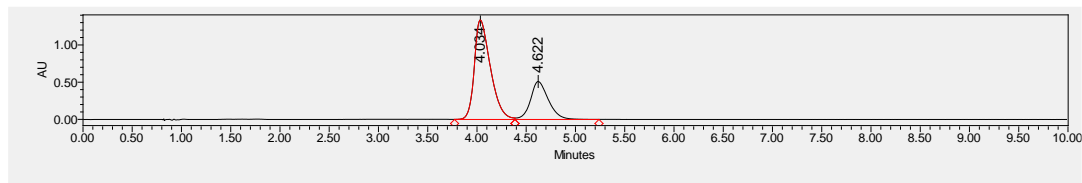

|   | Retention Time | Area     | % Area |
|---|----------------|----------|--------|
| 1 | 4.034          | 15136522 | 70.06  |
| 2 | 4.622          | 6468650  | 29.94  |

***N*-((3*S*,4*S*)-3-ethyl-2-oxo-4,6-diphenyl-5-(phenylethynyl)-3,4-dihydro-2*H*-pyran-3-yl)benzamide (D23)**

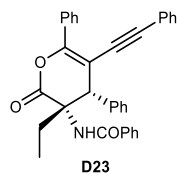

31.8 mg, 64% yield; pale yellow solid, melting point: 67.9 – 70.3 °C,  $[\alpha]_D^{21} = 54.7$  ( $c = 0.51$ ,  $\text{CH}_2\text{Cl}_2$ ).

Dissolved in *i*PrOH for SFC; SFC (Daicel chiralcel IA-3,  $\text{CO}_2/\text{IPROH} = 90/10$ , flow rate = 1.5 mL/min,  $\lambda = 254$  nm) retention time:  $t_{\text{major}} = 11.95$  min,  $t_{\text{minor}} = 7.11$  min. er = 69:31. dr >19:1.

**$^1\text{H NMR}$**  (400 MHz,  $\text{CDCl}_3$ )  $\delta$  8.18 – 8.13 (m, 2H), 7.54 – 7.41 (m, 6H), 7.40 – 7.16 (m, 12H), 6.85 (s, 1H), 4.97 (s, 1H), 3.15 – 3.02 (m, 1H), 2.41 – 2.27 (m, 1H), 0.97 (t,  $J = 4.0$  Hz, 3H).

**$^{13}\text{C NMR}$**  (101 MHz,  $\text{CDCl}_3$ )  $\delta$  169.0, 167.4, 151.9, 136.8, 134.9, 131.7, 131.5, 130.3, 128.9, 128.7, 128.7, 128.5, 128.4, 128.2, 127.7, 126.8, 123.0, 102.7, 96.3, 86.4, 64.0, 52.6, 26.3, 8.9.

**IR** (neat):  $\nu(\text{cm}^{-1})$ : 3420, 2932, 1762, 1666, 1485, 1095, 692, 528.

**HRMS** (ESI-TOF) calcd for  $\text{C}_{34}\text{H}_{27}\text{NO}_3^+$  ( $[\text{M}+\text{H}^+]$ ) = 498.2064, found 498.2064.

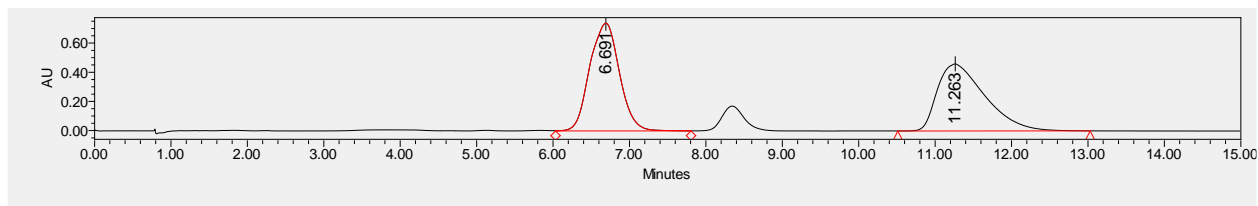

|   | Retention Time | Area     | % Area |
|---|----------------|----------|--------|
| 1 | 6.691          | 19955672 | 50.17  |
| 2 | 11.263         | 19820169 | 49.83  |

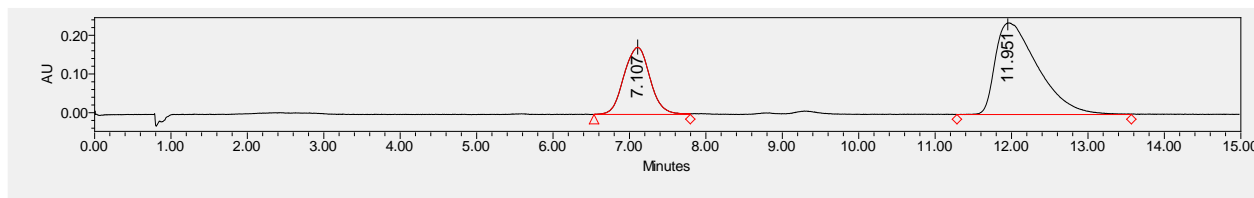

|   | Retention Time | Area    | % Area |
|---|----------------|---------|--------|
| 1 | 7.107          | 4112459 | 30.99  |
| 2 | 11.951         | 9156188 | 69.01  |

***N*-((3*S*,4*S*)-3-allyl-2-oxo-4,6-diphenyl-5-(phenylethynyl)-3,4-dihydro-2*H*-pyran-3-yl)benzamide (D24)**

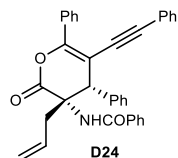

29.0 mg, 57% yield; pale yellow solid, melting point: 134.2 – 138.5 °C,  $[\alpha]_D^{21} = 76.5$  ( $c = 0.51$ ,  $\text{CH}_2\text{Cl}_2$ ).

Dissolved in *i*PrOH for SFC; SFC (Daicel chiralcel IA-3,  $\text{CO}_2/\text{MeOH} = 90/10$ , flow rate = 1.5 mL/min,  $\lambda = 254$  nm) retention time:  $t_{\text{major}} = 7.05$  min,  $t_{\text{minor}} = 4.98$  min. er = 79:21. dr >19:1.

**$^1\text{H}$  NMR** (400 MHz,  $\text{CDCl}_3$ )  $\delta$  8.18 – 8.14 (m, 2H), 7.55 – 7.40 (m, 6H), 7.40 – 7.16 (m, 12H), 6.86 (s, 1H), 5.82 – 5.67 (m, 1H), 5.23 – 5.12 (m, 2H), 5.01 (s, 1H), 3.91 – 3.82 (m, 1H), 3.04 – 2.94 (m, 1H).

**$^{13}\text{C}$  NMR** (101 MHz,  $\text{CDCl}_3$ )  $\delta$  168.4, 167.5, 152.0, 136.3, 134.9, 131.7, 131.5, 131.4, 131.1, 130.3, 129.0, 128.7, 128.5, 128.4, 128.3, 128.2, 127.7, 126.8, 122.9, 120.6, 102.6, 96.5, 86.3, 63.5, 52.3, 37.3.

**IR** (neat):  $\nu(\text{cm}^{-1})$ : 3418, 3062, 1762, 1666, 1485, 1145, 692, 530.

**HRMS** (ESI-TOF) calcd for  $\text{C}_{35}\text{H}_{27}\text{NO}_3^+$  ( $[\text{M}]+\text{H}^+$ ) = 510.2064, found 510.2067.

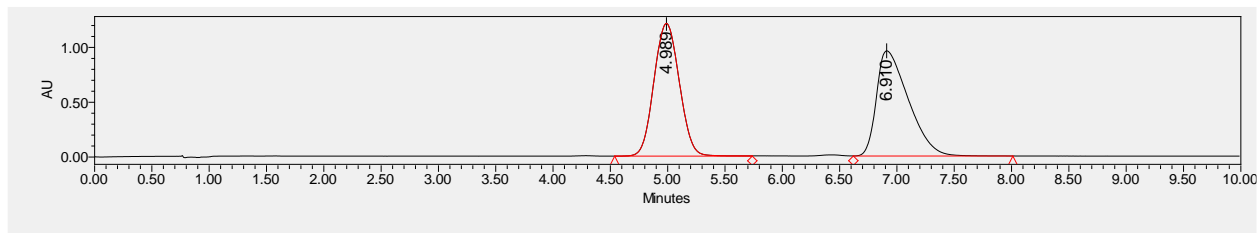

|   | Retention Time | Area     | % Area |
|---|----------------|----------|--------|
| 1 | 4.989          | 18616533 | 50.06  |
| 2 | 6.910          | 18569888 | 49.94  |

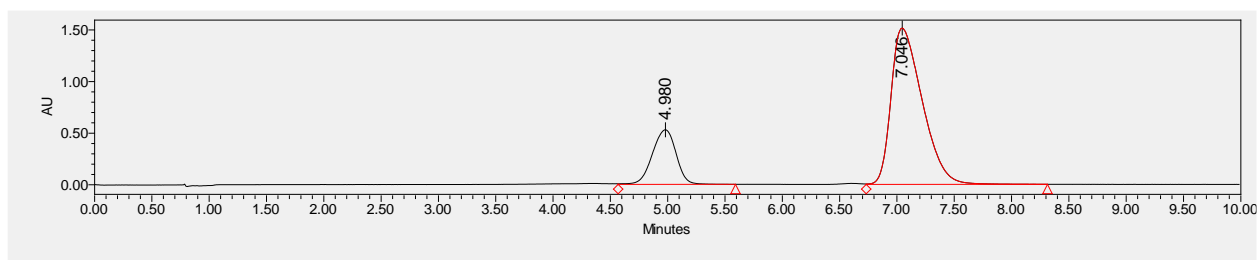

|   | Retention Time | Area     | % Area |
|---|----------------|----------|--------|
| 1 | 4.980          | 7617998  | 21.05  |
| 2 | 7.046          | 28567167 | 78.95  |

***N*-((3*S*,4*S*)-3-benzyl-2-oxo-4,6-diphenyl-5-(phenylethynyl)-3,4-dihydro-2*H*-pyran-3-yl)-4-methoxybenzamide (D25)**

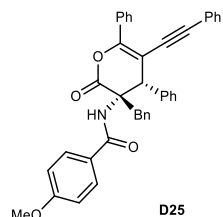

53.0 mg, 90% yield; white solid, melting point: 88.4 – 90.2 °C,  $[\alpha]_D^{20} = 42.8$  ( $c = 0.86$ ,  $\text{CH}_2\text{Cl}_2$ ).

Dissolved in *i*PrOH for SFC; SFC (Daicel chiralcel IA-3,  $\text{CO}_2/\text{MeOH} = 85/15$ , flow rate = 1.5 mL/min,  $\lambda = 254$  nm) retention time:  $t_{\text{major}} = 13.26$  min,  $t_{\text{minor}} = 9.10$  min. er = 94:6. dr >19:1.

<sup>1</sup>H NMR (400 MHz,  $\text{CDCl}_3$ )  $\delta$  8.28 – 8.23 (m, 2H), 7.59 – 7.45 (m, 3H), 7.43 – 7.25 (m, 9H), 7.27 – 7.16 (m, 6H), 7.13 – 7.09 (m, 2H), 6.84 – 6.78 (m, 2H), 6.57 (s, 1H), 5.16 (s, 1H), 4.36 (d,  $J = 12.0$  Hz, 1H), 3.79 (s, 3H), 3.57 (d,  $J = 12.0$  Hz, 1H).



$^{13}\text{C}$  NMR (101 MHz,  $\text{CDCl}_3$ )  $\delta$  168.1, 167.4, 162.4, 151.9, 136.4, 135.0, 131.5, 130.4, 130.1, 128.9, 128.7, 128.6, 128.5, 128.5, 128.5, 128.3, 128.2, 127.7, 127.5, 127.4, 122.9, 113.9, 102.8, 96.6, 86.4, 64.7, 55.5, 52.6, 38.6.

IR (neat):  $\nu(\text{cm}^{-1})$ : 3422, 3031, 1767, 1660, 1485, 1254, 763, 527.

HRMS (ESI-TOF) calcd for  $\text{C}_{40}\text{H}_{31}\text{NO}_4^+$  ( $[\text{M}+\text{H}^+$ ) = 590.2326, found 590.2328.

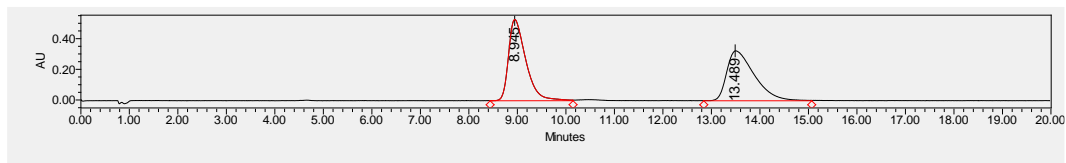

|   | Retention Time | Area     | % Area |
|---|----------------|----------|--------|
| 1 | 8.945          | 13103249 | 50.52  |
| 2 | 13.489         | 12831757 | 49.48  |

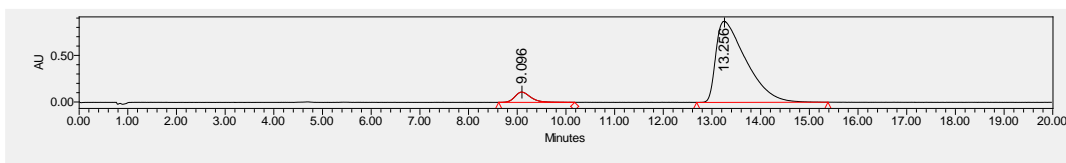

|   | Retention Time | Area     | % Area |
|---|----------------|----------|--------|
| 1 | 9.096          | 2559778  | 6.41   |
| 2 | 13.256         | 37400261 | 93.59  |

***N*-((3*S*,4*S*)-3-benzyl-2-oxo-4,6-diphenyl-5-(phenylethynyl)-3,4-dihydro-2*H*-pyran-3-yl)-3,5-dimethylbenzamide (D26)**

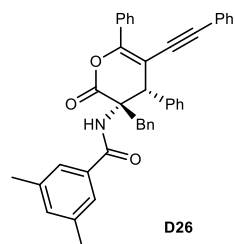

35.2 mg, 60% yield; white solid, melting point: 162.4 – 166.5 °C,  $[\alpha]_D^{20} = 45.4$  ( $c = 0.54$ ,  $\text{CH}_2\text{Cl}_2$ ).

Dissolved in *i*PrOH for SFC; SFC (Daicel chiralcel IA-3,  $\text{CO}_2/\text{MeOH} = 85/15$ , flow rate = 1.5 mL/min,  $\lambda = 254$  nm) retention time:  $t_{\text{major}} = 6.23$  min,  $t_{\text{minor}} = 5.37$  min. er = 88:12. dr >19:1.

**<sup>1</sup>H NMR** (400 MHz, CDCl<sub>3</sub>) δ 8.27 – 8.23 (m, 2H), 7.59 – 7.45 (m, 3H), 7.40 – 7.16 (m, 13H), 7.14 – 7.11 (m, 2H), 7.06 – 7.04 (m, 1H), 6.98 – 6.93 (m, 2H), 6.60 (s, 1H), 5.15 (s, 1H), 4.36 (d, *J* = 16.0 Hz, 1H), 3.57 (d, *J* = 12.0 Hz, 1H), 2.26 (s, 6H).

**<sup>13</sup>C NMR** (101 MHz, CDCl<sub>3</sub>) δ 168.4, 168.1, 151.9, 138.4, 136.4, 135.2, 134.9, 133.3, 131.5, 130.4, 130.2, 129.0, 128.7, 128.6, 128.5, 128.5, 128.3, 128.2, 127.7, 127.6, 124.5, 123.0, 102.9, 96.6, 86.4, 64.7, 52.7, 38.6, 21.3.

**IR** (neat):  $\nu$ (cm<sup>-1</sup>): 3421, 2923, 1769, 1664, 1496, 1166, 763, 553.

**HRMS** (ESI-TOF) calcd for C<sub>41</sub>H<sub>33</sub>NO<sub>3</sub><sup>+</sup> ([M]+H<sup>+</sup>) = 588.2533, found 588.2535.

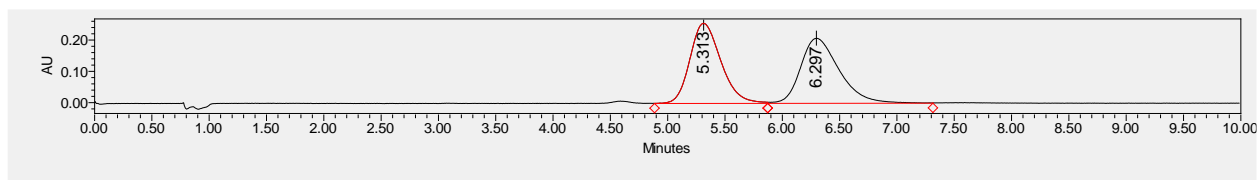

|   | Retention Time | Area    | % Area |
|---|----------------|---------|--------|
| 1 | 5.313          | 4809008 | 49.74  |
| 2 | 6.297          | 4860157 | 50.26  |

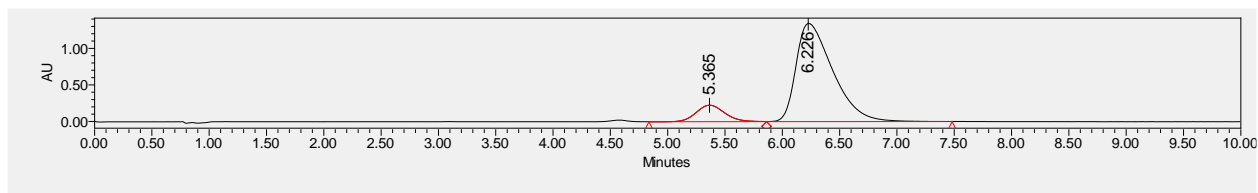

|   | Retention Time | Area     | % Area |
|---|----------------|----------|--------|
| 1 | 5.365          | 3921881  | 11.60  |
| 2 | 6.226          | 29882859 | 88.40  |

***N*-((3*S*,4*S*)-3-benzyl-2-oxo-4,6-diphenyl-5-(phenylethynyl)-3,4-dihydro-2H-pyran-3-yl)-3-methylbenzamide (D27)**

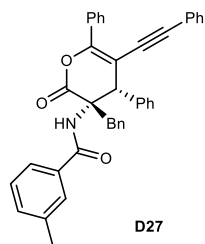

35.0 mg, 61% yield; pale pink solid, melting point: 131.8 – 134.9 °C,  $[\alpha]_D^{19} = 47.9$  ( $c = 0.56$ ,  $\text{CH}_2\text{Cl}_2$ ).

Dissolved in *i*PrOH for SFC; SFC (Daicel chiralcel IA-3,  $\text{CO}_2/\text{MeOH} = 85/15$ , flow rate = 1.5 mL/min,  $\lambda = 254$  nm) retention time:  $t_{\text{major}} = 7.34$  min,  $t_{\text{minor}} = 5.89$  min. er = 92:8. dr >19:1.

$^1\text{H NMR}$  (400 MHz,  $\text{CDCl}_3$ )  $\delta$  8.27 – 8.24 (m, 2H), 7.59 – 7.45 (m, 3H), 7.41 – 7.15 (m, 16H), 7.15 – 7.10 (m, 3H), 6.62 (s, 1H), 5.16 (s, 1H), 4.36 (d,  $J = 16.0$  Hz, 1H), 3.58 (d,  $J = 12.0$  Hz, 1H), 2.32 (s, 3H).

$^{13}\text{C NMR}$  (101 MHz,  $\text{CDCl}_3$ )  $\delta$  168.3, 168.0, 151.9, 138.6, 136.4, 135.1, 134.9, 132.5, 131.5, 131.5, 130.4, 130.1, 129.0, 128.7, 128.6, 128.5, 128.5, 128.3, 128.2, 127.7, 127.6, 127.4, 123.8, 122.9, 102.8, 96.6, 86.3, 64.7, 52.6, 38.6, 21.4.

**IR** (neat):  $\nu(\text{cm}^{-1})$ : 3419, 3031, 1768, 1665, 1506, 1165, 751, 526.

**HRMS** (ESI-TOF) calcd for  $\text{C}_{40}\text{H}_{31}\text{NO}_3^+$  ( $[\text{M}]+\text{H}^+$ ) = 574.2377, found 574.2376.

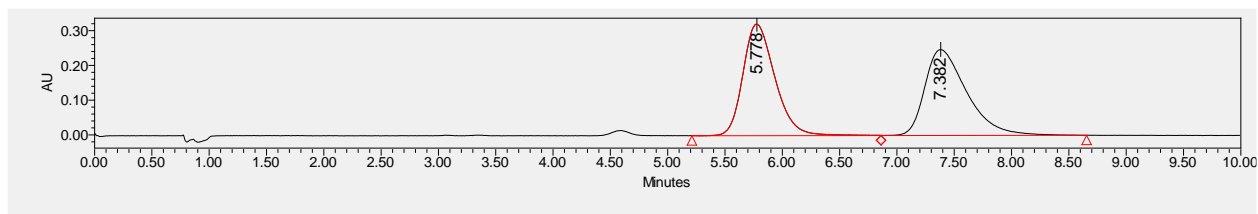

|   | Retention Time | Area    | % Area |
|---|----------------|---------|--------|
| 1 | 5.778          | 6227542 | 49.75  |
| 2 | 7.382          | 6289379 | 50.25  |

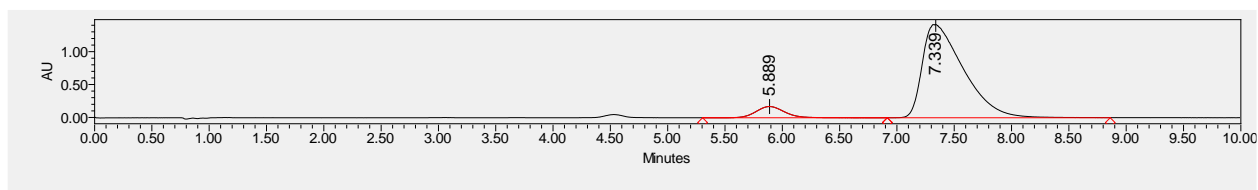

|   | Retention Time | Area     | % Area |
|---|----------------|----------|--------|
| 1 | 5.889          | 3001894  | 7.81   |
| 2 | 7.339          | 35410614 | 92.19  |

***N*-((3*S*,4*S*)-3-benzyl-2-oxo-4,6-diphenyl-5-(phenylethynyl)-3,4-dihydro-2H-pyran-3-yl)-4-chlorobenzamide (D28)**

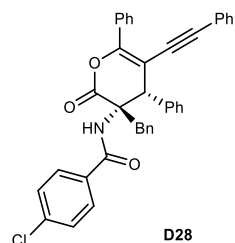

51.1 mg, 86% yield; pale yellow solid, melting point: 100.3 – 102.9 °C,  $[\alpha]_D^{19} = 33.8$  ( $c = 0.79$ ,  $\text{CH}_2\text{Cl}_2$ ).

Dissolved in *i*PrOH for SFC; SFC (Daicel chiralcel IA-3,  $\text{CO}_2/\text{MeOH} = 85/15$ , flow rate = 1.5 mL/min,  $\lambda = 254$  nm) retention time:  $t_{\text{major}} = 12.70$  min,  $t_{\text{minor}} = 7.39$  min. er = 91:9. dr >19:1.

$^1\text{H NMR}$  (400 MHz,  $\text{CDCl}_3$ )  $\delta$  8.27 – 8.23 (m, 2H), 7.59 – 7.45 (m, 3H), 7.40 – 7.18 (m, 17H), 7.11 – 7.08 (m, 2H), 6.59 (s, 1H), 5.13 (s, 1H), 4.32 (d,  $J = 16.0$  Hz, 1H), 3.59 (d,  $J = 16.0$  Hz, 1H).

$^{13}\text{C NMR}$  (101 MHz,  $\text{CDCl}_3$ )  $\delta$  168.0, 166.9, 151.9, 138.0, 136.3, 134.7, 133.4, 131.5, 131.4, 130.5, 130.1, 129.0, 128.8, 128.6, 128.5, 128.3, 128.2, 127.7, 127.7, 122.9, 102.7, 96.7, 86.2, 64.8, 52.7, 38.6.

**IR** (neat):  $\nu(\text{cm}^{-1})$ : 3412, 3030, 1768, 1667, 1481, 1167, 751, 529.

**HRMS** (ESI-TOF) calcd for  $\text{C}_{39}\text{H}_{28}\text{ClNO}_3^+$  ( $[\text{M}]+\text{H}^+$ ) = 594.1830, 595.1864, found 594.1835, 595.1866.

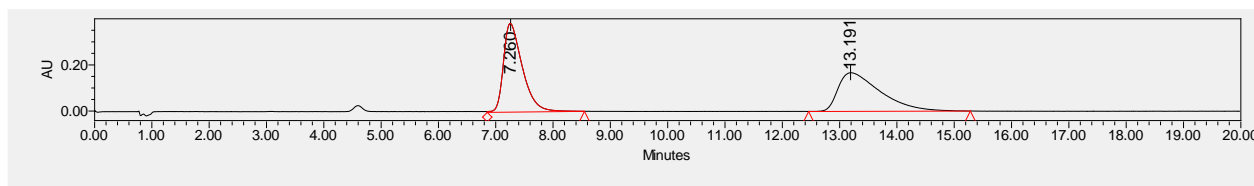

|   | Retention Time | Area    | % Area |
|---|----------------|---------|--------|
| 1 | 7.260          | 8823029 | 50.65  |
| 2 | 13.191         | 8597080 | 49.35  |

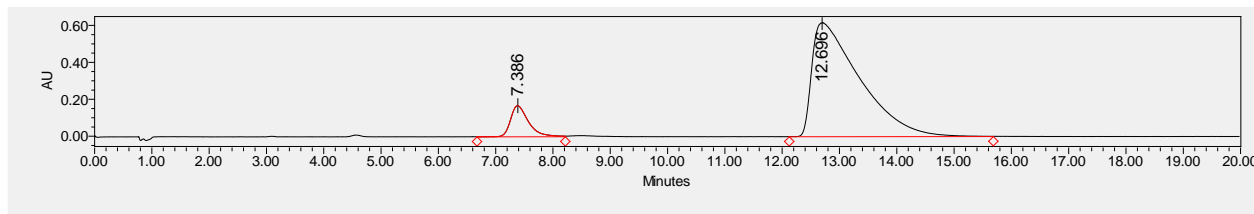

|   | Retention Time | Area     | % Area |
|---|----------------|----------|--------|
| 1 | 7.386          | 3697892  | 9.36   |
| 2 | 12.696         | 35808717 | 90.64  |

***N*-((3*S*,4*S*)-3-benzyl-2-oxo-4,6-diphenyl-5-(phenylethynyl)-3,4-dihydro-2*H*-pyran-3-yl)-2-naphthamide (D29)**

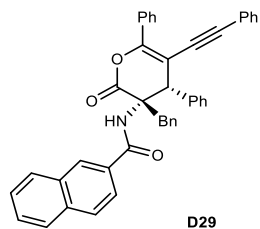

28.0 mg, 46% yield; white solid, melting point: 231.2 – 235.6 °C,  $[\alpha]_D^{19} = 30.4$  ( $c = 0.90$ ,  $\text{CH}_2\text{Cl}_2$ ).

Dissolved in *i*PrOH for SFC; SFC (Daicel chiralcel IA-3,  $\text{CO}_2/\text{MeOH} = 85/15$ , flow rate = 1.5 mL/min,  $\lambda = 254$  nm) retention time:  $t_{\text{major}} = 23.11$  min,  $t_{\text{minor}} = 16.84$  min. er = 96:4. dr >19:1.

**$^1\text{H}$  NMR** (400 MHz,  $\text{CDCl}_3$ )  $\delta$  8.29 – 8.25 (m, 2H), 7.87 – 7.76 (m, 4H), 7.60 – 7.45 (m, 6H), 7.42 – 7.11 (m, 15H), 6.80 (s, 1H), 5.21 (s, 1H), 4.42 (d,  $J = 12.0$  Hz, 1H), 3.62 (d,  $J = 12.0$  Hz, 1H).

**$^{13}\text{C}$  NMR** (101 MHz,  $\text{CDCl}_3$ )  $\delta$  168.1, 168.0, 151.9, 136.4, 134.9, 132.6, 132.2, 131.5, 131.5, 130.4, 130.2, 129.0, 129.0, 128.8, 128.7, 128.6, 128.5, 128.3, 128.3, 127.8, 127.8, 127.6, 127.3, 126.9, 123.4, 122.9, 102.8, 96.7, 86.4, 64.9, 52.7, 38.7.

**IR** (neat):  $\nu(\text{cm}^{-1})$ : 3416, 3060, 1768, 1664, 1496, 1166, 759, 529.

**HRMS** (ESI-TOF) calcd for  $\text{C}_{43}\text{H}_{31}\text{NO}_3^+$  ( $[\text{M}]+\text{H}^+$ ) = 610.2377, found 610.2379.

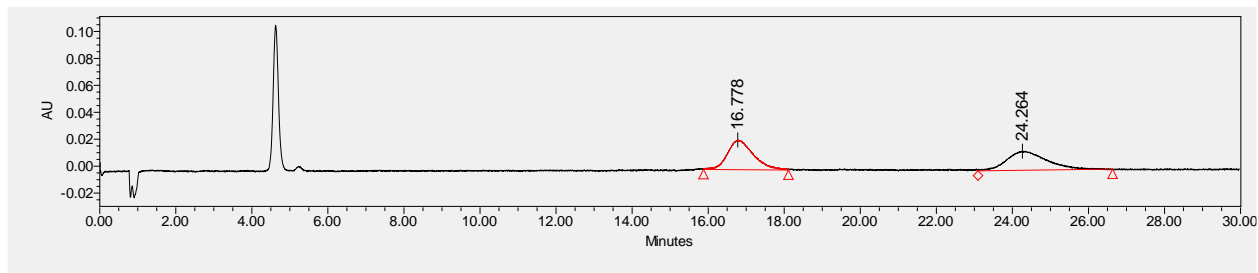

|   | Retention Time | Area    | % Area |
|---|----------------|---------|--------|
| 1 | 16.778         | 1039152 | 50.11  |
| 2 | 24.264         | 1034592 | 49.89  |

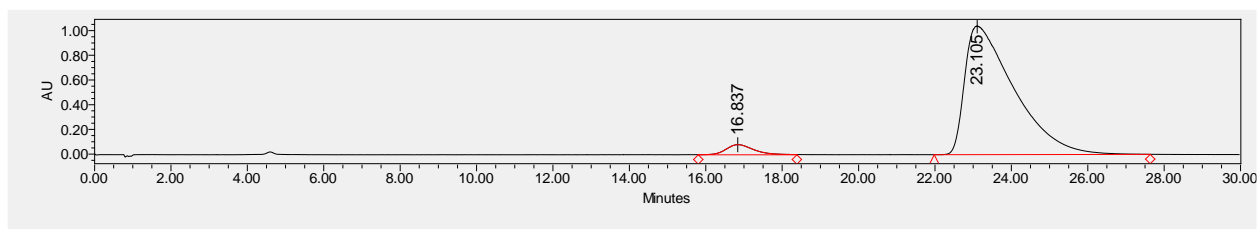

|   | Retention Time | Area     | % Area |
|---|----------------|----------|--------|
| 1 | 16.837         | 4148403  | 4.25   |
| 2 | 23.105         | 93520130 | 95.75  |

***N*-((3*R*,5*S*)-3-benzyl-5-((*S*)-4-benzyl-5-oxo-2-phenyl-4,5-dihydrooxazol-4-yl)-4-((*E*)-benzylidene)-2-oxo-3,4,5,6,7,8-hexahydro-2*H*-chromen-3-yl)benzamide (E1)**

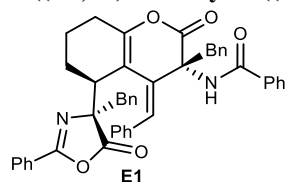

69.2 mg, 99% yield; pale yellow solid, melting point: 131.6 – 133.9 °C,  $[\alpha]_D^{23} = -232.2$  ( $c = 1.09$ ,  $\text{CH}_2\text{Cl}_2$ ).

Dissolved in *i*PrOH for HPLC; HPLC (Chiralcel IC, hexane/*i*PrOH = 95/5, flow rate 1.0 mL/min,  $\lambda = 254$  nm) retention time:  $t_{\text{major}} = 26.04$  min,  $t_{\text{minor}} = 21.17$  min. er >99:1. dr >19:1.

**<sup>1</sup>H NMR** (400 MHz,  $\text{CDCl}_3$ )  $\delta$  8.08 – 7.57 (m, 4H), 7.52 – 7.11 (m, 17H), 7.05 – 6.57 (m, 6H), 4.71 – 4.36 (m, 1H), 3.75 – 3.46 (m, 1H), 3.29 – 3.19 (m, 1H), 3.07 – 2.92 (m, 1H), 2.71 – 2.40 (m, 2H), 2.07 – 1.79 (m, 3H), 1.66 – 1.47 (m, 1H), 1.32 – 1.20 (m, 1H).

**<sup>13</sup>C NMR** (101 MHz,  $\text{CDCl}_3$ )  $\delta$  178.6, 167.2, 159.7, 152.0, 137.4, 135.8, 133.8, 132.5, 131.9, 130.4, 130.1, 129.1, 128.7, 128.6, 128.4, 127.9, 127.7, 127.1, 127.0, 125.5, 67.7, 42.4, 39.2, 36.0, 29.7, 25.3, 23.5, 17.3.

IR (neat):  $\nu(\text{cm}^{-1})$ : 3409, 2925, 1761, 1655, 1481, 1137, 968, 779.

HRMS (ESI-TOF) calcd for  $\text{C}_{46}\text{H}_{38}\text{N}_2\text{O}_5^+$  ( $[\text{M}+\text{H}]^+$ ) = 699.2853, found 699.2853.

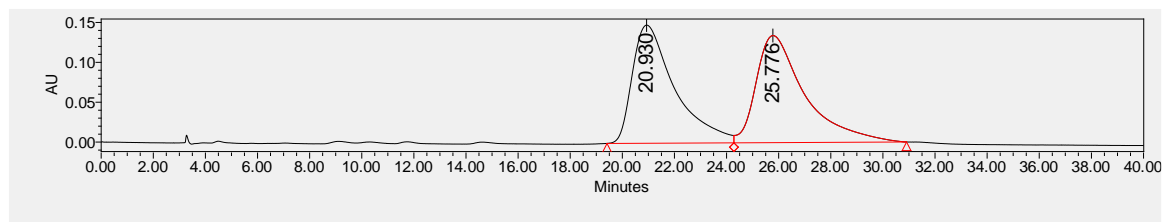

|   | Retention Time | Area     | % Area |
|---|----------------|----------|--------|
| 1 | 20.930         | 16721621 | 49.01  |
| 2 | 25.776         | 17399757 | 50.99  |

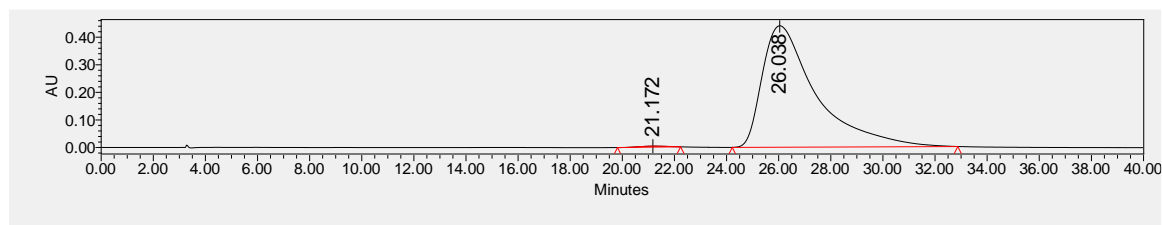

|   | Retention Time | Area     | % Area |
|---|----------------|----------|--------|
| 1 | 21.172         | 277579   | 0.44   |
| 2 | 26.038         | 63041412 | 99.56  |

*N*-((3*R*,5*S*)-3-benzyl-5-((*S*)-4-benzyl-5-oxo-2-phenyl-4,5-dihydrooxazol-4-yl)-4-((*E*)-4-methylbenzylidene)-2-oxo-3,4,5,6,7,8-hexahydro-2*H*-chromen-3-yl)benzamide (**E2**)

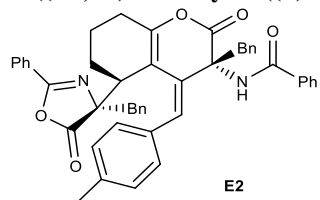

70.5 mg, 99% yield; pale yellow solid, melting point: 137.2 – 139.4 °C,  $[\alpha]_{\text{D}}^{22} = -263.4$  ( $c = 1.10$ ,  $\text{CH}_2\text{Cl}_2$ ).

Dissolved in *i*PrOH for SFC; SFC (Daicel chiralcel IC-3,  $\text{CO}_2/\text{MeOH} = 85/15$ , flow rate = 1.5 mL/min,  $\lambda = 254$  nm) retention time:  $t_{\text{major}} = 10.23$  min,  $t_{\text{minor}} = 12.57$  min. er = 99:1. dr >19:1.

**<sup>1</sup>H NMR** (400 MHz, CDCl<sub>3</sub>) δ 7.88 – 7.61 (m, 4H), 7.56 – 7.39 (m, 4H), 7.36 – 7.10 (m, 12H), 7.06 – 6.96 (m, 5H), 6.90 – 6.73 (s, 1H), 4.63 – 4.39 (m, 1H), 3.76 – 3.50 (m, 1H), 3.38 – 3.25 (m, 1H), 3.06 – 2.91 (m, 1H), 2.66 – 2.47 (m, 2H), 2.38 (s, 3H), 2.11 – 1.81 (m, 3H), 1.64 – 1.49 (m, 1H), 1.29 – 1.24 (m, 1H).

**<sup>13</sup>C NMR** (101 MHz, CDCl<sub>3</sub>) δ 178.7, 167.2, 159.8, 151.9, 137.9, 133.9, 132.5, 131.9, 130.5, 130.2, 129.3, 129.2, 128.8, 128.7, 128.5, 128.0, 127.8, 127.2, 127.2, 125.6, 67.8, 42.6, 39.2, 35.9, 29.8, 25.3, 23.7, 21.5, 17.5.

**IR** (neat): ν(cm<sup>-1</sup>): 3410, 2924, 1761, 1657, 1481, 1137, 970, 749.

**HRMS** (ESI-TOF) calcd for C<sub>47</sub>H<sub>40</sub>N<sub>2</sub>O<sub>5</sub><sup>+</sup> ([M]+H<sup>+</sup>) = 713.3010, found 713.3010.

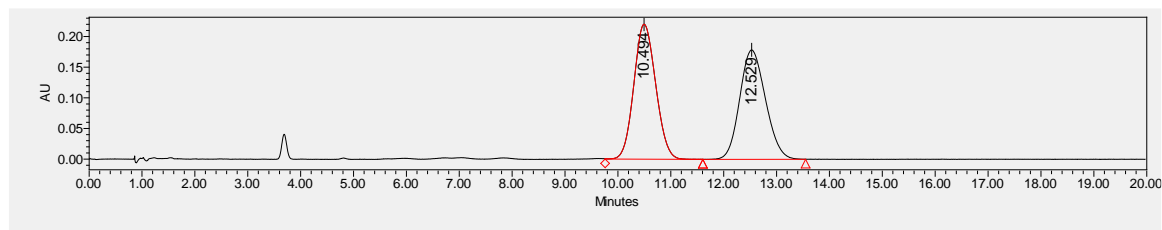

|   | Retention Time | Area    | % Area |
|---|----------------|---------|--------|
| 1 | 10.494         | 6319737 | 51.14  |
| 2 | 12.529         | 6037940 | 48.86  |

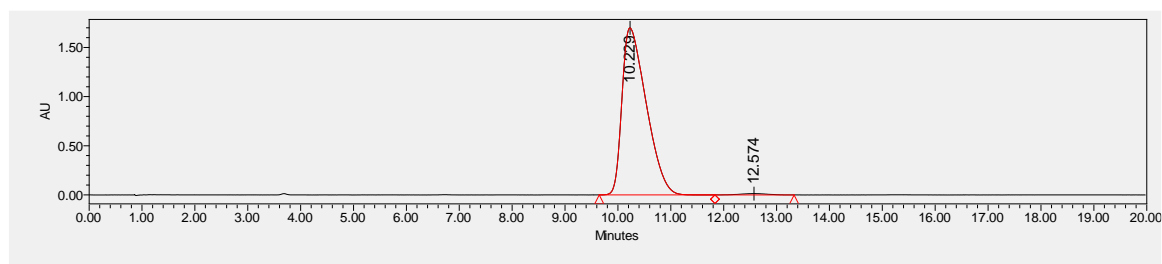

|   | Retention Time | Area     | % Area |
|---|----------------|----------|--------|
| 1 | 10.229         | 54076108 | 99.12  |
| 2 | 12.574         | 482206   | 0.88   |

***N*-((3*R*,5*S*)-3-benzyl-5-((*S*)-4-benzyl-5-oxo-2-phenyl-4,5-dihydrooxazol-4-yl)-4-((*E*)-4-methoxybenzylidene)-2-oxo-3,4,5,6,7,8-hexahydro-2*H*-chromen-3-yl)benzamide (E3)**

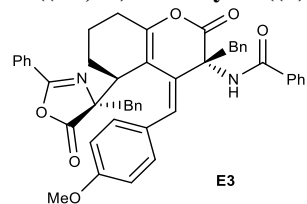



72.1 mg, 99% yield; pale yellow solid, melting point: 139.8 – 142.1 °C,  $[\alpha]_D^{22} = -300.8$  ( $c = 1.14$ ,  $\text{CH}_2\text{Cl}_2$ ).

Dissolved in *i*PrOH for SFC; SFC (Daicel chiralcel IC-3,  $\text{CO}_2/\text{MeOH} = 85/15$ , flow rate = 1.5 mL/min,  $\lambda = 254$  nm) retention time:  $t_{\text{major}} = 12.55$  min,  $t_{\text{minor}} = 15.91$  min. er = 99:1. dr >19:1.

$^1\text{H NMR}$  (400 MHz,  $\text{CDCl}_3$ )  $\delta$  7.81 – 7.65 (m, 4H), 7.51 – 7.25 (m, 6H), 7.24 – 6.89 (m, 13H), 6.89 – 6.82 (m, 2H), 6.79 (s, 1H), 4.52 – 4.38 (m, 1H), 3.81 (s, 3H), 3.68 – 3.24 (m, 2H), 3.03 – 2.90 (m, 1H), 2.57 – 2.41 (m, 2H), 2.05 – 1.75 (m, 3H), 1.62 – 1.46 (m, 1H), 1.24 – 1.21 (m, 1H).

$^{13}\text{C NMR}$  (101 MHz,  $\text{CDCl}_3$ )  $\delta$  178.7, 167.3, 159.8, 159.4, 151.8, 133.9, 132.5, 131.9, 130.6, 130.5, 130.2, 128.8, 128.7, 128.0, 127.8, 127.2, 127.1, 125.6, 122.4, 114.0, 67.7, 55.4, 42.6, 39.1, 29.8, 25.3, 23.8, 22.8, 17.5.

**IR** (neat):  $\nu(\text{cm}^{-1})$ : 3409, 2927, 1759, 1657, 1508, 1252, 970, 697.

**HRMS** (ESI-TOF) calcd for  $\text{C}_{47}\text{H}_{40}\text{N}_2\text{O}_6^+$  ( $[\text{M}+\text{H}^+]$ ) = 729.2959, found 729.2959.

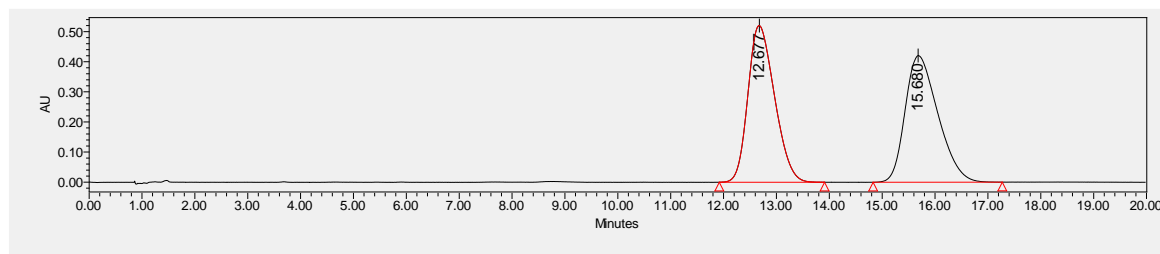

|   | Retention Time | Area     | % Area |
|---|----------------|----------|--------|
| 1 | 12.677         | 18179735 | 50.08  |
| 2 | 15.680         | 18119339 | 49.92  |

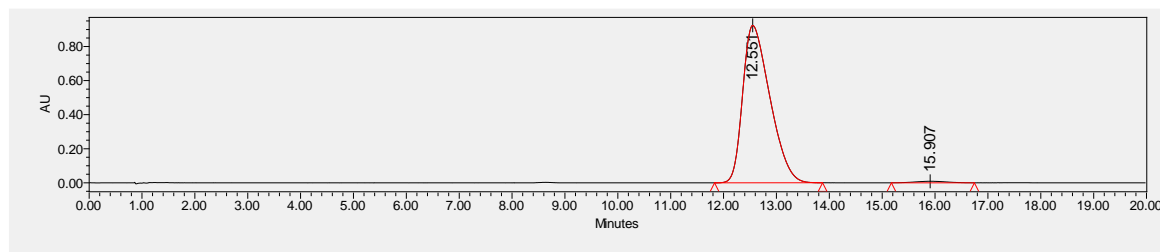

|   | Retention Time | Area     | % Area |
|---|----------------|----------|--------|
| 1 | 12.551         | 32976873 | 98.87  |
| 2 | 15.907         | 377754   | 1.13   |

*N*-((3*R*,5*S*)-3-benzyl-5-((*S*)-4-benzyl-5-oxo-2-phenyl-4,5-dihydrooxazol-4-yl)-4-((*E*)-4-fluorobenzylidene)-2-oxo-3,4,5,6,7,8-hexahydro-2H-chromen-3-yl)benzamide (E4)

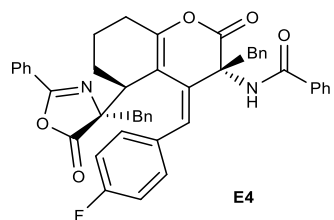

61.7 mg, 86% yield; pale yellow solid, melting point: 134.3 – 137.2 °C,  $[\alpha]_D^{22} = -220.1$  ( $c = 0.94$ ,  $\text{CH}_2\text{Cl}_2$ ).

Dissolved in *i*PrOH for SFC; SFC (Daicel chiralcel IC-3,  $\text{CO}_2/\text{MeOH} = 90/10$ , flow rate = 1.0 mL/min,  $\lambda = 254$  nm) retention time:  $t_{\text{major}} = 23.43$  min,  $t_{\text{minor}} = 26.78$  min. er = 99:1. dr >19:1.

**$^1\text{H}$  NMR** (400 MHz,  $\text{CDCl}_3$ )  $\delta$  7.80 – 7.66 (m, 4H), 7.53 – 7.38 (m, 4H), 7.37 – 7.27 (m, 4H), 7.25 – 7.14 (m, 5H), 7.07 – 6.93 (m, 8H), 6.82 (s, 1H), 4.62 – 4.36 (m, 1H), 3.68 – 3.44 (m, 1H), 3.20 – 3.16 (m, 1H), 3.05 – 2.95 (m, 1H), 2.66 – 2.45 (m, 2H), 2.04 – 1.84 (m, 3H), 1.61 – 1.50 (m, 1H), 1.32 – 1.24 (m, 1H).

**$^{13}\text{C}$  NMR** (101 MHz,  $\text{CDCl}_3$ )  $\delta$  178.6, 164.1, 161.5, 152.6, 133.7, 132.6, 132.1, 130.5, 130.2, 130.0, 128.8, 128.7, 128.6, 128.1, 127.8, 127.3, 127.2, 125.3 (d,  $J = 50.0$  Hz), 116.0 (d,  $J = 20.0$  Hz), 67.9, 42.6, 39.6, 36.2, 29.8, 25.4, 23.6, 17.5.

**$^{19}\text{F}$  NMR** (376 MHz,  $\text{CDCl}_3$ )  $\delta$  -112.61.

**IR** (neat):  $\nu(\text{cm}^{-1})$ : 3410, 2926, 1763, 1657, 1505, 1227, 971, 698.

**HRMS** (ESI-TOF) calcd for  $\text{C}_{46}\text{H}_{37}\text{FN}_2\text{O}_5^+$  ( $[\text{M}+\text{H}^+]$ ) = 717.2759, found 717.2759.

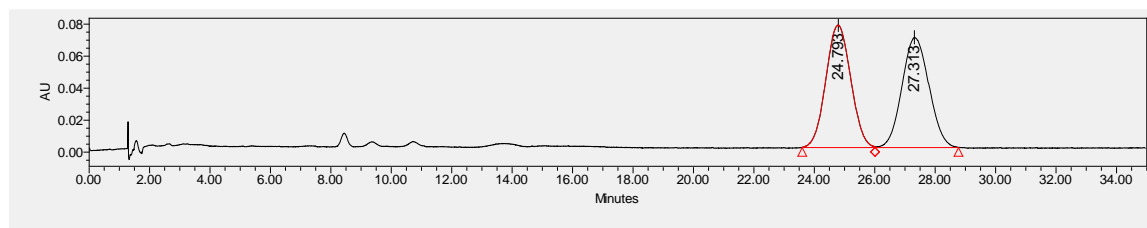

|   | Retention Time | Area    | % Area |
|---|----------------|---------|--------|
| 1 | 24.793         | 4366910 | 50.56  |
| 2 | 27.313         | 4270151 | 49.44  |

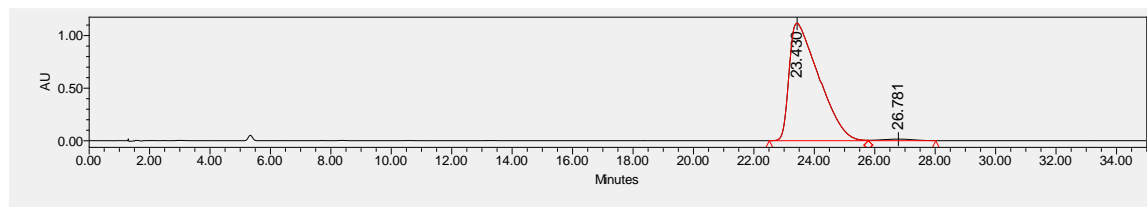

|   | Retention Time | Area     | % Area |
|---|----------------|----------|--------|
| 1 | 23.430         | 76002427 | 98.59  |
| 2 | 26.781         | 1083171  | 1.41   |

***N*-((3*R*,5*S*)-3-benzyl-5-((*S*)-4-benzyl-5-oxo-2-phenyl-4,5-dihydrooxazol-4-yl)-4-((*E*)-4-chlorobenzylidene)-2-oxo-3,4,5,6,7,8-hexahydro-2*H*-chromen-3-yl)benzamide (E5)**

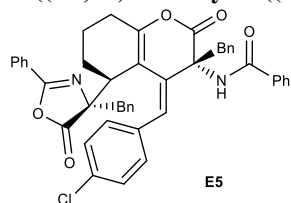

63.8 mg, 87% yield; pale yellow solid, melting point: 142.3 – 144.6 °C,  $[\alpha]_D^{21} = -220.7$  ( $c = 0.99$ ,  $\text{CH}_2\text{Cl}_2$ ).

Dissolved in *i*PrOH for SFC; SFC (Daicel chiralcel IC-3,  $\text{CO}_2/\text{MeOH} = 85/15$ , flow rate = 1.0 mL/min,  $\lambda = 254$  nm) retention time:  $t_{\text{major}} = 16.97$  min,  $t_{\text{minor}} = 19.34$  min. er = 98:2. dr >19:1.

**$^1\text{H NMR}$**  (400 MHz,  $\text{CDCl}_3$ )  $\delta$  7.92 – 7.62 (m, 4H), 7.56 – 7.08 (m, 16H), 7.07 – 6.91 (m, 5H), 6.80 (s, 1H), 4.62 – 4.23 (m, 1H), 3.74 – 3.37 (m, 1H), 3.23 – 3.13 (m, 1H), 3.03 – 2.93 (m, 1H), 2.68 – 2.45 (m, 2H), 2.28 – 1.81 (m, 3H), 1.64 – 1.43 (m, 1H), 1.29 – 1.23 (m, 1H).

**$^{13}\text{C NMR}$**  (101 MHz,  $\text{CDCl}_3$ )  $\delta$  178.6, 167.2, 159.9, 152.5, 135.8, 133.7, 132.6, 132.0, 130.6, 130.5, 130.2, 128.8, 128.7, 128.6, 128.1, 127.8, 127.3, 127.1, 125.5, 124.9, 67.7, 42.7, 39.1, 36.2, 29.8, 25.4, 23.7, 17.3.

**IR** (neat):  $\nu(\text{cm}^{-1})$ : 3410, 2925, 1763, 1656, 1483, 1138, 970, 697.

**HRMS** (ESI-TOF) calcd for  $\text{C}_{46}\text{H}_{37}\text{ClN}_2\text{O}_5^+$  ( $[\text{M}]+\text{K}^+$ ) = 771.2023, 772.2056, found 771.2025, 772.2059.

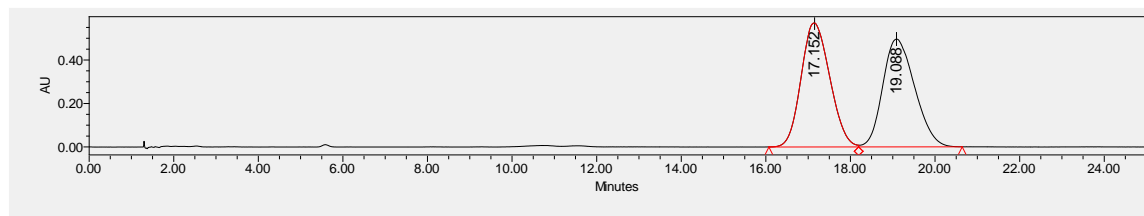

|   | Retention Time | Area     | % Area |
|---|----------------|----------|--------|
| 1 | 17.152         | 26885041 | 50.84  |
| 2 | 19.088         | 25996435 | 49.16  |

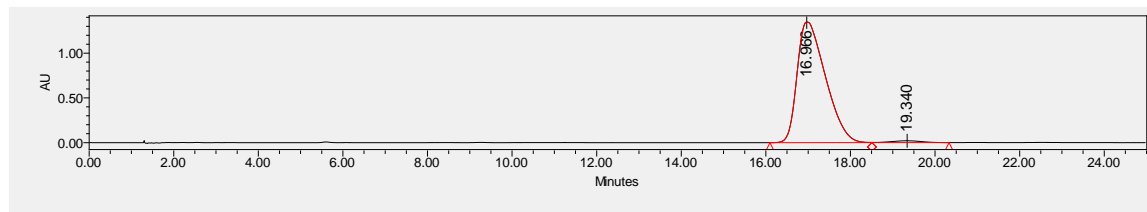

|   | Retention Time | Area     | % Area |
|---|----------------|----------|--------|
| 1 | 16.966         | 62616730 | 98.40  |
| 2 | 19.340         | 1016100  | 1.60   |

***N*-((3*R*,5*S*)-3-benzyl-5-((*S*)-4-benzyl-5-oxo-2-phenyl-4,5-dihydrooxazol-4-yl)-4-((*E*)-4-bromobenzylidene)-2-oxo-3,4,5,6,7,8-hexahydro-2*H*-chromen-3-yl)benzamide (E6)**

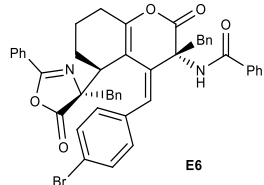

74.7 mg, 96% yield; pale yellow solid, melting point: 148.2 – 151.3 °C,  $[\alpha]_D^{21} = -225.0$  ( $c = 1.21$ ,  $\text{CH}_2\text{Cl}_2$ ).

Dissolved in *i*PrOH for SFC; SFC (Daicel chiralcel IC-3,  $\text{CO}_2/\text{MeOH} = 85/15$ , flow rate = 1.5 mL/min,  $\lambda = 254$  nm) retention time:  $t_{\text{major}} = 13.16$  min,  $t_{\text{minor}} = 15.18$  min. er = 98:2. dr >19:1.

$^1\text{H NMR}$  (400 MHz,  $\text{CDCl}_3$ )  $\delta$  7.84 – 7.67 (m, 4H), 7.53 – 7.28 (m, 9H), 7.26 – 7.10 (m, 7H), 7.07 – 6.90 (m, 5H), 6.76 (s, 1H), 4.61 – 4.22 (m, 1H), 3.68 – 3.41 (m, 1H), 3.23 – 3.15 (m, 1H), 3.04 – 2.93 (m, 1H), 2.66 – 2.44 (m, 2H), 2.11 – 1.84 (m, 3H), 1.61 – 1.46 (m, 1H), 1.33 – 1.19 (m, 1H).

$^{13}\text{C NMR}$  (101 MHz,  $\text{CDCl}_3$ )  $\delta$  178.6, 167.2, 160.0, 152.5, 133.7, 132.6, 132.0, 131.7, 130.9, 130.5, 130.2, 128.8, 128.7, 128.5, 128.1, 127.8, 127.3, 127.1, 125.5, 122.0, 67.7, 42.6, 39.3, 36.1, 29.8, 25.4, 23.7, 17.3.

**IR** (neat):  $\nu(\text{cm}^{-1})$ : 3410, 2926, 1764, 1656, 1482, 1138, 969, 697.

**HRMS** (ESI-TOF) calcd for  $\text{C}_{46}\text{H}_{37}\text{BrN}_2\text{O}_5^+$  ( $[\text{M}] + \text{Na}^+$ ) = 799.1778, 801.1758, found 799.1779, 801.1768.

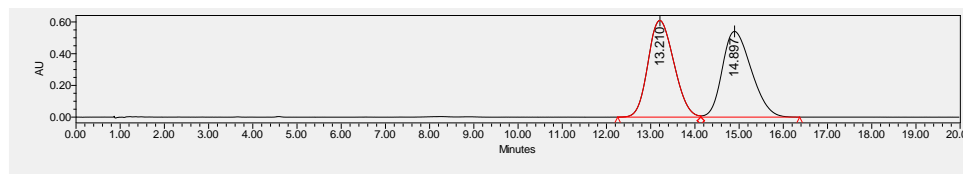

|   | Retention Time | Area     | % Area |
|---|----------------|----------|--------|
| 1 | 13.210         | 24804168 | 50.17  |
| 2 | 14.897         | 24638847 | 49.83  |

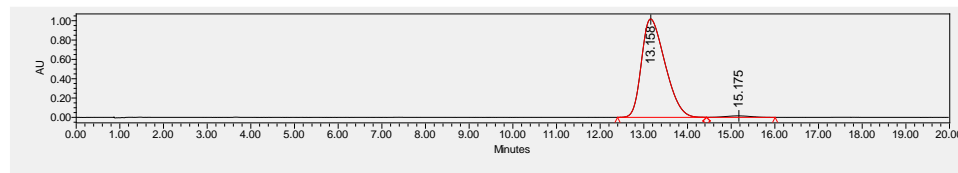

|   | Retention Time | Area     | % Area |
|---|----------------|----------|--------|
| 1 | 13.158         | 38159677 | 98.34  |
| 2 | 15.175         | 644292   | 1.66   |

*N*-((3*R*,5*S*)-3-benzyl-5-((*S*)-4-benzyl-5-oxo-2-phenyl-4,5-dihydrooxazol-4-yl)-4-((*E*)-2-fluorobenzylidene)-2-oxo-3,4,5,6,7,8-hexahydro-2*H*-chromen-3-yl)benzamide (E7)

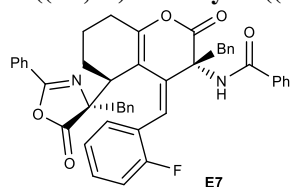

68.8 mg, 96% yield; pale yellow solid, melting point: 138.1 – 141.6 °C,  $[\alpha]_D^{22} = -210.3$  ( $c = 0.99$ ,  $\text{CH}_2\text{Cl}_2$ ).

Dissolved in *i*PrOH for SFC; SFC (Daicel chiralcel IC-3,  $\text{CO}_2/\text{MeOH} = 90/10$ , flow rate = 1.0 mL/min,  $\lambda = 254$  nm) retention time:  $t_{\text{major}} = 23.25$  min,  $t_{\text{minor}} = 26.46$  min. er = 98:2. dr >19:1.

$^1\text{H NMR}$  (400 MHz,  $\text{CDCl}_3$ )  $\delta$  7.84 – 7.65 (m, 4H), 7.52 – 6.95 (m, 21H), 6.86 – 6.78 (s, 1H), 4.55 – 4.34 (m, 1H), 3.61 – 3.47 (m, 1H), 3.21 – 3.15 (m, 1H), 3.03 – 2.94 (m, 1H), 2.58 – 2.44 (m, 2H), 2.08 – 1.82 (m, 3H), 1.62 – 1.48 (m, 1H), 1.31 – 1.23 (m, 1H).

$^{13}\text{C NMR}$  (101 MHz,  $\text{CDCl}_3$ )  $\delta$  178.6, 167.3, 162.40 (d,  $J = 240.0$  Hz), 159.9, 152.3, 133.7, 132.6, 132.0, 131.0, 130.9, 130.5, 130.2, 128.8, 128.7, 128.5, 128.0, 127.8, 127.3, 127.1, 125.5, 115.59 (d,  $J = 20.0$  Hz), 67.8, 42.6, 38.3, 31.4, 29.8, 25.4, 23.7, 17.4.

$^{19}\text{F NMR}$  (376 MHz,  $\text{CDCl}_3$ )  $\delta$  -112.78.

IR (neat):  $\nu(\text{cm}^{-1})$ : 3410, 2926, 1765, 1657, 1505, 1228, 971, 750.

HRMS (ESI-TOF) calcd for  $\text{C}_{46}\text{H}_{37}\text{FN}_2\text{O}_5^+$  ( $[\text{M}]+\text{Na}^+$ ) = 739.2579, found 739.2579.

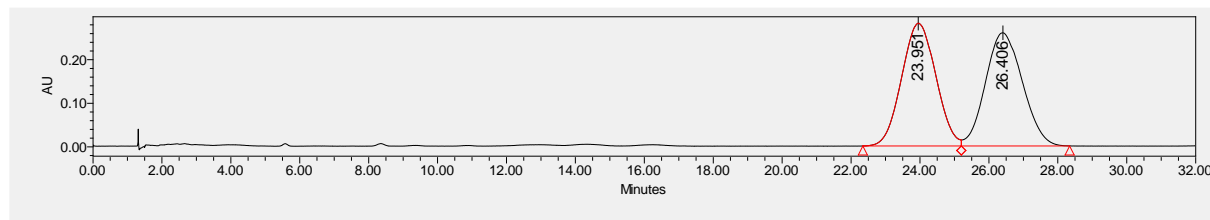

|   | Retention Time | Area     | % Area |
|---|----------------|----------|--------|
| 1 | 23.951         | 19436202 | 50.04  |
| 2 | 26.406         | 19406716 | 49.96  |

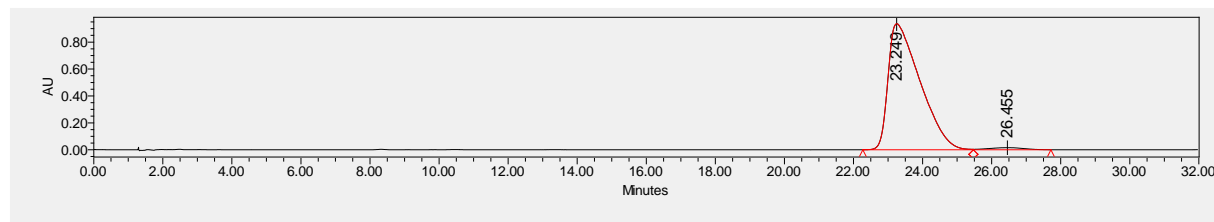

|   | Retention Time | Area     | % Area |
|---|----------------|----------|--------|
| 1 | 23.249         | 60049288 | 98.22  |
| 2 | 26.455         | 1090584  | 1.78   |

***N*-((3*R*,5*S*)-3-benzyl-5-((*S*)-4-benzyl-5-oxo-2-phenyl-4,5-dihydrooxazol-4-yl)-4-((*E*)-3-fluorobenzylidene)-2-oxo-3,4,5,6,7,8-hexahydro-2*H*-chromen-3-yl)benzamide (E8)**

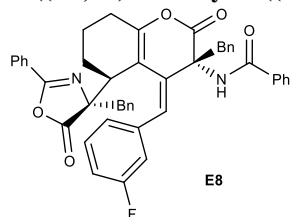

69.5 mg, 97% yield; pale yellow solid, melting point: 134.1 – 136.8 °C,  $[\alpha]_D^{22} = -212.2$  ( $c = 1.06$ ,  $\text{CH}_2\text{Cl}_2$ ).

Dissolved in *i*PrOH for SFC; SFC (Daicel chiralcel IC-3,  $\text{CO}_2/\text{MeOH} = 90/10$ , flow rate = 1.0 mL/min,  $\lambda = 254$  nm) retention time:  $t_{\text{major}} = 21.43$  min,  $t_{\text{minor}} = 24.48$  min. er = 98:2. dr >19:1.

$^1\text{H NMR}$  (400 MHz,  $\text{CDCl}_3$ )  $\delta$  7.77 – 7.69 (m, 4H), 7.53 – 7.27 (m, 8H), 7.27 – 7.11 (m, 5H), 7.08 – 6.93 (m, 8H), 6.82 (s, 1H), 4.59 – 4.34 (m, 1H), 3.61 – 3.47 (m, 1H), 3.23 – 3.14 (m, 1H), 3.06 – 2.96 (m, 1H), 2.60 – 2.47 (m, 2H), 1.99 – 1.84 (m, 3H), 1.61 – 1.50 (m, 1H), 1.34 – 1.23 (m, 1H).

$^{13}\text{C NMR}$  (101 MHz,  $\text{CDCl}_3$ )  $\delta$  178.6, 167.2, 162.8 (d,  $J = 250.0$  Hz), 159.9, 152.6, 133.7, 132.6, 132.1, 130.5, 130.2, 130.0, 130.0, 128.8, 128.7, 128.6, 128.1, 127.8, 127.3, 127.2, 125.3 (d,  $J = 50.0$  Hz), 116.0 (d,  $J = 20.0$  Hz), 67.7, 42.7, 39.6, 36.0, 29.8, 25.4, 23.6, 17.4.

$^{19}\text{F NMR}$  (376 MHz,  $\text{CDCl}_3$ )  $\delta$  -112.61.

**IR** (neat):  $\nu(\text{cm}^{-1})$ : 3410, 2926, 1765, 1656, 1481, 1139, 972, 696.

**HRMS** (ESI-TOF) calcd for  $\text{C}_{46}\text{H}_{37}\text{FN}_2\text{O}_5^+$  ( $[\text{M}]+\text{K}^+$ ) = 755.2318, found 755.2318.

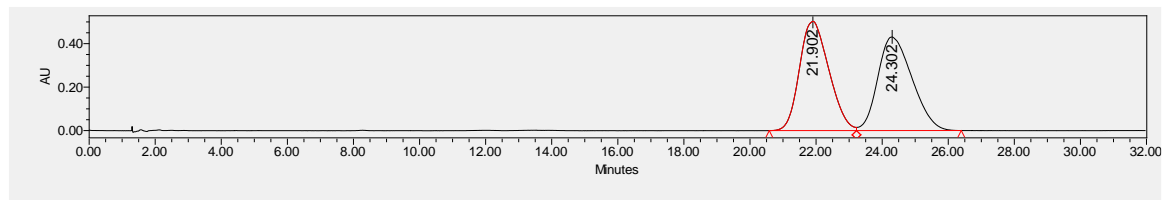

|   | Retention Time | Area     | % Area |
|---|----------------|----------|--------|
| 1 | 21.902         | 31084315 | 50.07  |
| 2 | 24.302         | 31001150 | 49.93  |

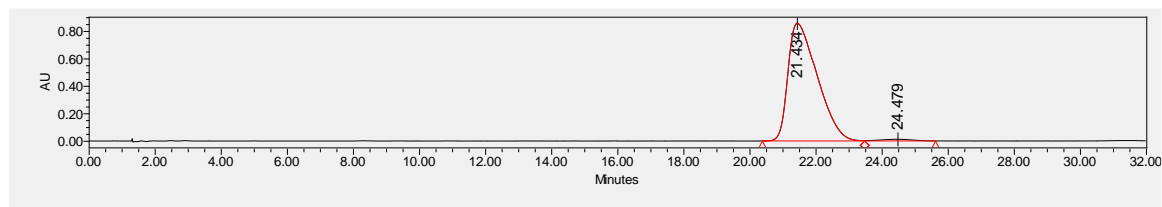

|   | Retention Time | Area     | % Area |
|---|----------------|----------|--------|
| 1 | 21.434         | 52744755 | 98.44  |
| 2 | 24.479         | 835102   | 1.56   |

***N*-((3*R*,5*S*,*E*)-3-benzyl-5-((*S*)-4-benzyl-5-oxo-2-phenyl-4,5-dihydrooxazol-4-yl)-2-oxo-4-(thiophen-3-ylmethylene)-3,4,5,6,7,8-hexahydro-2*H*-chromen-3-yl)benzamide (E9)**

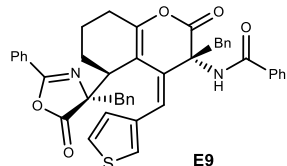

60.6 mg, 86% yield; pale yellow solid, melting point: 137.5 – 140.2 °C,  $[\alpha]_D^{22} = -249.4$  ( $c = 0.89$ ,  $\text{CH}_2\text{Cl}_2$ ).

Dissolved in *i*PrOH for SFC; SFC (Daicel chiralcel IC-3,  $\text{CO}_2/\text{MeOH} = 85/15$ , flow rate = 1.0 mL/min,  $\lambda = 254$  nm) retention time:  $t_{\text{major}} = 17.59$  min,  $t_{\text{minor}} = 19.78$  min. er = 98:2. dr >19:1.

**$^1\text{H NMR}$**  (400 MHz,  $\text{CDCl}_3$ )  $\delta$  8.04 – 7.66 (m, 4H), 7.55 – 6.95 (m, 20H), 6.76 (s, 1H), 4.66 – 4.29 (m, 1H), 3.76 – 3.51 (m, 1H), 3.44 – 3.31 (m, 1H), 3.11 – 2.98 (m, 1H), 2.68 – 2.43 (m, 2H), 2.20 – 1.80 (m, 3H), 1.62 – 1.50 (m, 1H), 1.33 – 1.24 (m, 1H).

**$^{13}\text{C NMR}$**  (101 MHz,  $\text{CDCl}_3$ )  $\delta$  178.7, 167.3, 159.8, 151.9, 138.3, 133.9, 132.5, 132.0, 130.5, 130.2, 128.8, 128.7, 128.4, 128.0, 127.8, 127.2, 127.2, 126.0, 125.6, 124.7, 67.6, 42.7, 39.3, 36.1, 29.8, 25.4, 23.9, 17.5.

**IR** (neat):  $\nu(\text{cm}^{-1})$ : 3409, 2926, 1761, 1657, 1481, 1137, 971, 698.

HRMS (ESI-TOF) calcd for C<sub>44</sub>H<sub>36</sub>N<sub>2</sub>O<sub>5</sub>S<sup>+</sup> ([M]+H<sup>+</sup>) = 705.2418, found 705.2418.

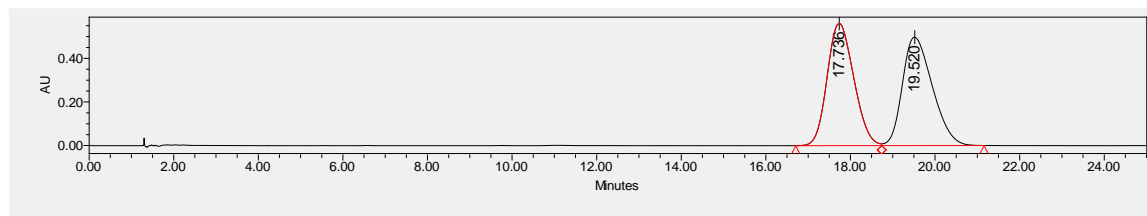

|   | Retention Time | Area     | % Area |
|---|----------------|----------|--------|
| 1 | 17.736         | 24471101 | 50.03  |
| 2 | 19.520         | 24442172 | 49.97  |

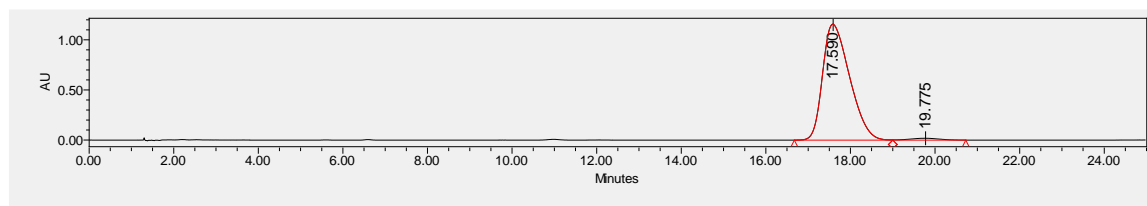

|   | Retention Time | Area     | % Area |
|---|----------------|----------|--------|
| 1 | 17.590         | 51168580 | 98.33  |
| 2 | 19.775         | 871117   | 1.67   |

*N*-((3*R*,5*S*,*E*)-3-benzyl-5-((*S*)-4-benzyl-5-oxo-2-phenyl-4,5-dihydrooxazol-4-yl)-4-(naphthalen-1-ylmethylene)-2-oxo-3,4,5,6,7,8-hexahydro-2*H*-chromen-3-yl)benzamide (E10)

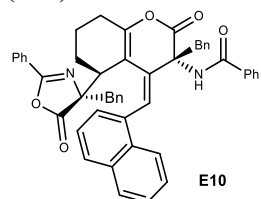

74.2 mg, 99% yield; pale yellow solid, melting point: 208.5 – 212.4 °C,  $[\alpha]_D^{22} = -228.9$  ( $c = 1.26$ , CH<sub>2</sub>Cl<sub>2</sub>).

Dissolved in *i*PrOH for HPLC; HPLC (Chiralcel IC, hexane/*i*PrOH = 95/5, flow rate 0.8 mL/min,  $\lambda = 254$  nm) retention time:  $t_{\text{major}} = 17.74$  min,  $t_{\text{minor}} = 15.28$  min. er = 99:1. dr >19:1.

<sup>1</sup>H NMR (400 MHz, CDCl<sub>3</sub>)  $\delta$  8.21 – 8.07 (m, 1H), 7.94 – 7.76 (m, 4H), 7.64 – 7.60 (m, 2H), 7.56 – 7.25 (m, 15H), 7.23 (m, 1H), 7.06 – 6.75 (m, 6H), 4.73 – 4.57 (m, 1H), 3.72 – 3.55 (m, 1H), 3.14 – 3.01 (m, 1H), 2.69 (m, 1H), 2.58 – 2.36 (m, 2H), 1.90 – 1.55 (m, 4H), 1.28 – 1.25 (m, 1H).



<sup>13</sup>C NMR (101 MHz, CDCl<sub>3</sub>) δ 178.8, 167.7, 159.7, 152.0, 136.1, 135.1, 134.9, 133.9, 133.7, 132.5, 132.0, 131.7, 130.4, 129.9, 129.0, 128.8, 128.7, 128.6, 128.0, 127.7, 127.5, 127.2, 126.6, 125.9, 125.5, 125.1, 68.1, 43.3, 40.2, 36.4, 29.8, 25.3, 23.7, 17.4.

IR (neat): ν(cm<sup>-1</sup>): 3408, 2925, 1760, 1657, 1481, 1136, 969, 697.

HRMS (ESI-TOF) calcd for C<sub>50</sub>H<sub>40</sub>N<sub>2</sub>O<sub>5</sub><sup>+</sup> ([M]+H<sup>+</sup>) = 749.3010, found 749.3010.

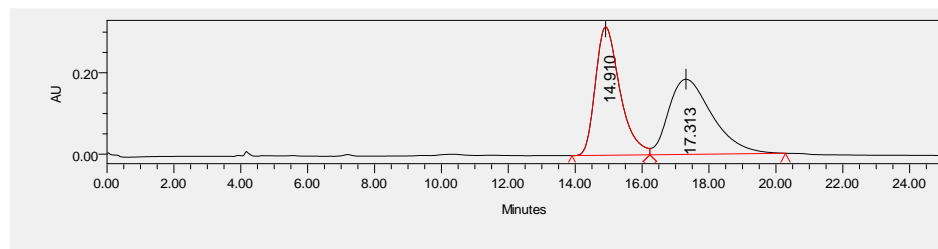

|   | Retention Time | Area     | % Area |
|---|----------------|----------|--------|
| 1 | 14.910         | 16064721 | 49.05  |
| 2 | 17.313         | 16689101 | 50.95  |

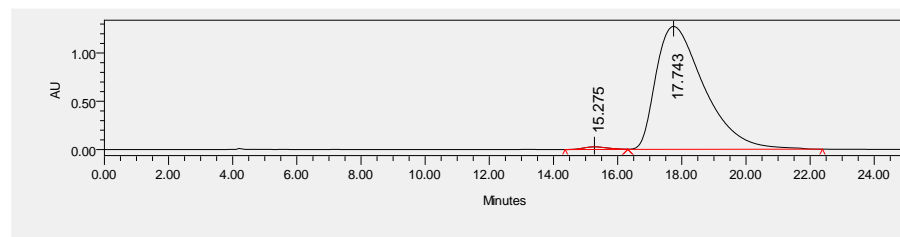

|   | Retention Time | Area      | % Area |
|---|----------------|-----------|--------|
| 1 | 15.275         | 1436220   | 1.07   |
| 2 | 17.743         | 133314724 | 98.93  |

*N*-((3*R*,5*S*,*E*)-3-benzyl-5-((*S*)-4-benzyl-5-oxo-2-phenyl-4,5-dihydrooxazol-4-yl)-4-(naphthalen-2-ylmethylene)-2-oxo-3,4,5,6,7,8-hexahydro-2*H*-chromen-3-yl)benzamide (E11)

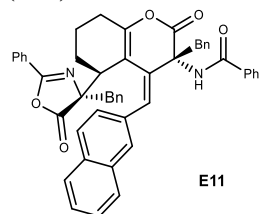

74.2 mg, 99% yield; pale yellow solid, melting point: 151.3 – 154.5 °C, [α]<sup>22</sup><sub>D</sub> = -275.4 (c = 1.20, CH<sub>2</sub>Cl<sub>2</sub>).

Dissolved in *i*PrOH for SFC; SFC (Daicel chiralcel IC-3, CO<sub>2</sub>/MeOH = 80/10, flow rate = 1.5 mL/min, λ = 254 nm) retention time:  $t_{\text{major}} = 10.94$  min,  $t_{\text{minor}} = 13.98$  min. er = 98:2. dr >19:1.

<sup>1</sup>H NMR (400 MHz, CDCl<sub>3</sub>) δ 7.82 – 7.54 (m, 8H), 7.46 – 7.01 (m, 15H), 6.96 – 6.82 (m, 6H), 4.61 – 4.35 (m, 1H), 3.64 – 3.46 (m, 1H), 3.27 – 3.17 (m, 1H), 2.93 – 2.80 (m, 1H), 2.58 – 2.45 (m, 2H), 1.91 – 1.73 (m, 3H), 1.58 – 1.44 (m, 1H), 1.20 – 1.16 (m, 1H).

<sup>13</sup>C NMR (101 MHz, CDCl<sub>3</sub>) δ 178.7, 167.3, 159.8, 152.2, 135.0, 133.8, 133.3, 132.9, 132.5, 132.0, 130.5, 130.3, 128.8, 128.7, 128.5, 128.2, 128.1, 128.0, 127.9, 127.8, 127.5, 127.4, 127.2, 127.0, 126.6, 125.5, 67.9, 42.6, 39.7, 36.1, 29.8, 25.4, 23.8, 17.5.

IR (neat): ν (cm<sup>-1</sup>): 3409, 2925, 1761, 1656, 1481, 1137, 970, 697.

HRMS (ESI-TOF) calcd for C<sub>50</sub>H<sub>40</sub>N<sub>2</sub>O<sub>5</sub><sup>+</sup> ([M]+K<sup>+</sup>) = 787.2569, found 787.2569.

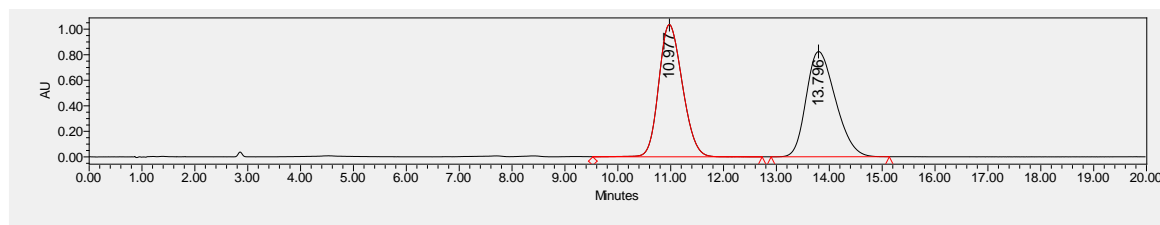

|   | Retention Time | Area     | % Area |
|---|----------------|----------|--------|
| 1 | 10.977         | 32173511 | 50.40  |
| 2 | 13.796         | 31662039 | 49.60  |

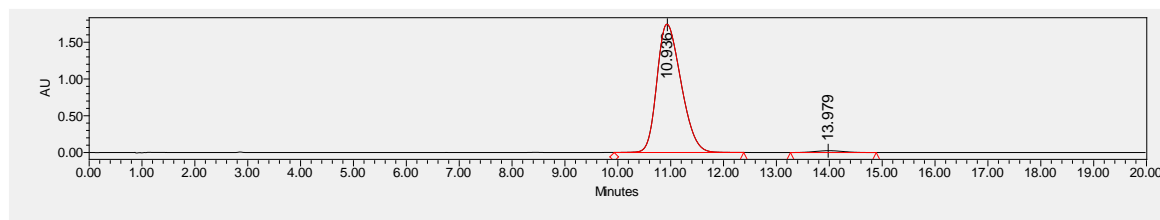

|   | Retention Time | Area     | % Area |
|---|----------------|----------|--------|
| 1 | 10.936         | 55233407 | 98.35  |
| 2 | 13.979         | 927239   | 1.65   |

*N*-((3*R*,5*S*)-3-benzyl-5-((*S*)-4-benzyl-5-oxo-2-phenyl-4,5-dihydrooxazol-4-yl)-4-((*E*)-ferrocenyl-ylmethylene)-2-oxo-3,4,5,6,7,8-hexahydro-2H-chromen-3-yl)benzamide (E12)

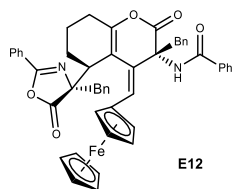

68.6 mg, 85% yield; orange solid, melting point: 149.6 – 153.1 °C,  $[\alpha]_D^{25} = 437.3$  ( $c = 1.29$ ,  $\text{CH}_2\text{Cl}_2$ ).

Dissolved in *i*PrOH for HPLC; HPLC (Chiralcel IC, hexane/*i*PrOH = 90/10, flow rate 1.0 mL/min,  $\lambda = 254$  nm) retention time:  $t_{\text{major}} = 44.84$  min,  $t_{\text{minor}} = 24.87$  min. er = 99:1. dr >19:1.

**$^1\text{H}$  NMR** (400 MHz,  $\text{CDCl}_3$ )  $\delta$  7.90 – 7.64 (m, 4H), 7.54 – 7.36 (m, 4H), 7.32 – 7.12 (m, 8H), 7.04 – 6.94 (m, 5H), 6.68 (s, 1H), 4.51 – 4.18 (m, 5H), 4.07 – 4.00 (m, 5H), 3.84 – 3.47 (m, 2H), 3.03 – 2.92 (m, 1H), 2.63 – 2.45 (m, 2H), 2.10 – 1.52 (m, 5H).

**$^{13}\text{C}$  NMR** (101 MHz,  $\text{CDCl}_3$ )  $\delta$  178.7, 166.0, 159.7, 151.0, 134.0, 132.5, 132.0, 130.5, 130.2, 128.9, 128.7, 128.0, 127.7, 127.1, 127.0, 125.6, 71.4, 70.2, 70.0, 69.6, 69.0, 68.1, 42.6, 38.5, 35.8, 29.8, 25.4, 23.9, 17.5.

**IR** (neat):  $\nu(\text{cm}^{-1})$ : 3408, 2926, 1762, 1656, 1452, 1141, 967, 697.

**HRMS** (ESI-TOF) calcd for  $\text{C}_{50}\text{H}_{42}\text{FeN}_2\text{O}_5^+$  ( $[\text{M}]+\text{H}^+$ ) = 807.2516, found 807.2515.

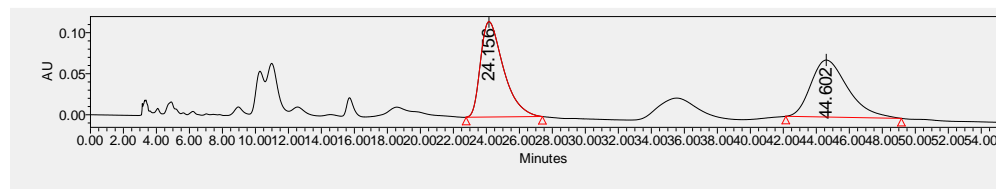

|   | Retention Time | Area     | % Area |
|---|----------------|----------|--------|
| 1 | 24.156         | 11252525 | 50.94  |
| 2 | 44.602         | 10836079 | 49.06  |

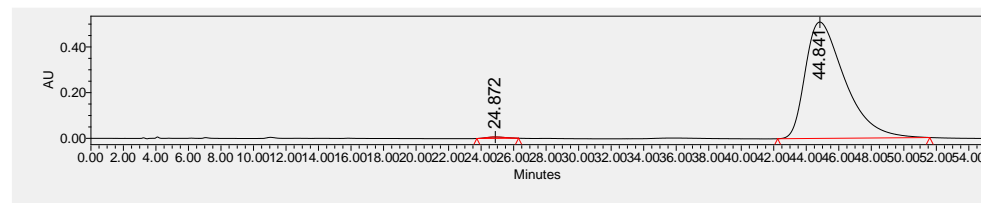

|   | Retention Time | Area     | % Area |
|---|----------------|----------|--------|
| 1 | 24.872         | 500331   | 0.58   |
| 2 | 44.841         | 85819965 | 99.42  |

***N*-((3*R*,5*S*)-4-((*E*)-benzylidene)-3-(4-methoxybenzyl)-5-((*S*)-4-(4-methoxybenzyl)-5-oxo-2-phenyl-4,5-dihydrooxazol-4-yl)-2-oxo-3,4,5,6,7,8-hexahydro-2*H*-chromen-3-yl)benzamide (E13)**

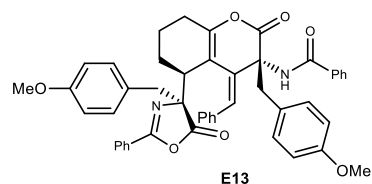

75.0 mg, 99% yield; pale yellow solid, melting point: 141.2 – 144.7 °C,  $[\alpha]_D^{21} = -198.4$  ( $c = 1.32$ ,  $\text{CH}_2\text{Cl}_2$ ).

Dissolved in *i*PrOH for SFC; SFC (Daicel chiralcel IC-3,  $\text{CO}_2/\text{MeOH} = 85/15$ , flow rate = 1.5 mL/min,  $\lambda = 254$  nm) retention time:  $t_{\text{major}} = 16.53$  min,  $t_{\text{minor}} = 19.32$  min. er = 99:1. dr >19:1.

$^1\text{H NMR}$  (400 MHz,  $\text{CDCl}_3$ )  $\delta$  7.83 – 7.66 (m, 4H), 7.57 – 7.28 (m, 10H), 7.27 – 7.20 (m, 2H), 7.11 – 7.06 (m, 2H), 6.96 – 6.72 (m, 5H), 6.60 – 6.54 (m, 2H), 4.56 – 4.30 (m, 1H), 3.77 – 3.72 (m, 3H), 3.63 – 3.60 (m, 3H), 3.55 – 3.26 (m, 1H), 3.23 – 3.14 (m, 1H), 2.98 – 2.85 (m, 1H), 2.64 – 2.48 (m, 2H), 2.07 – 1.74 (m, 4H), 1.63 – 1.47 (m, 1H).

$^{13}\text{C NMR}$  (101 MHz,  $\text{CDCl}_3$ )  $\delta$  178.7, 167.3, 159.8, 158.7, 152.0, 132.5, 132.0, 131.5, 131.2, 129.2, 128.8, 128.7, 128.4, 128.0, 127.8, 127.1, 125.9, 125.6, 113.8, 113.4, 68.0, 55.3, 55.1, 45.6, 41.6, 39.2, 35.1, 25.4, 23.6, 17.3.

**IR** (neat):  $\nu(\text{cm}^{-1})$ : 3410, 2954, 1762, 1655, 1511, 1249, 1031, 696.

**HRMS** (ESI-TOF) calcd for  $\text{C}_{48}\text{H}_{42}\text{N}_2\text{O}_7^+$  ( $[\text{M}+\text{K}^+]$ ) = 797.2624, found 797.2625.

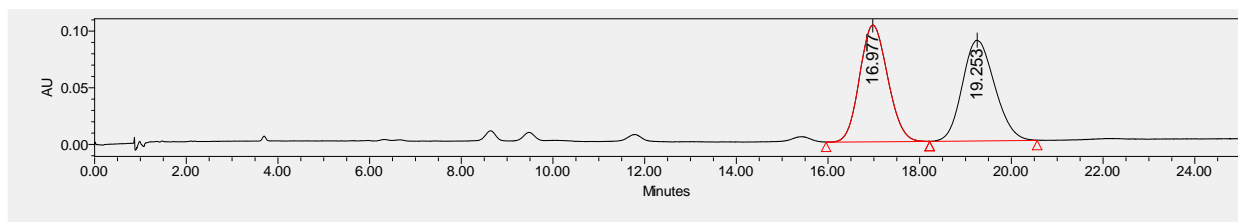

|   | Retention Time | Area    | % Area |
|---|----------------|---------|--------|
| 1 | 16.977         | 4387918 | 50.10  |
| 2 | 19.253         | 4370725 | 49.90  |

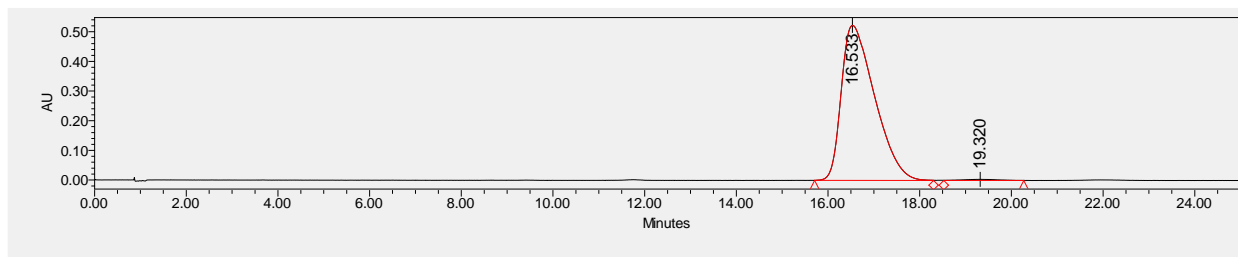

|   | Retention Time | Area     | % Area |
|---|----------------|----------|--------|
| 1 | 16.533         | 26363194 | 99.26  |
| 2 | 19.320         | 197004   | 0.74   |

***N*-((3*R*,5*S*)-4-((*E*)-benzylidene)-3-(4-bromobenzyl)-5-((*S*)-4-(4-bromobenzyl)-5-oxo-2-phenyl-4,5-dihydrooxazol-4-yl)-2-oxo-3,4,5,6,7,8-hexahydro-2*H*-chromen-3-yl)benzamide (E14)**

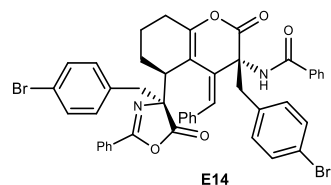

84.7 mg, 99% yield; white solid, melting point: 149.6 – 153.7 °C,  $[\alpha]_D^{20} = -202.4$  ( $c = 1.44$ ,  $\text{CH}_2\text{Cl}_2$ ).

Dissolved in *i*PrOH for HPLC; HPLC (Chiralcel IC, hexane/*i*PrOH = 98/2, flow rate 1.0 mL/min,  $\lambda = 254$  nm) retention time:  $t_{\text{major}} = 20.77$  min,  $t_{\text{minor}} = 26.72$  min. er = 95:5. dr >19:1.

<sup>1</sup>H NMR (400 MHz,  $\text{CDCl}_3$ )  $\delta$  7.83 – 7.70 (m, 4H), 7.57 – 7.26 (m, 12H), 7.26 – 7.12 (m, 4H), 7.04 – 6.97 (m, 2H), 6.89 – 6.85 (m, 3H), 4.52 – 4.24 (m, 1H), 3.55 – 3.39 (m, 1H), 3.21 – 3.13 (m, 1H), 2.99 – 2.89 (m, 1H), 2.64 – 2.43 (m, 2H), 2.00 – 1.70 (m, 4H), 1.59 – 1.45 (m, 1H).

<sup>13</sup>C NMR (101 MHz,  $\text{CDCl}_3$ )  $\delta$  178.5, 167.3, 160.1, 152.2, 137.4, 132.9, 132.8, 132.2, 132.1, 131.8, 131.6, 131.2, 129.2, 128.9, 128.8, 128.5, 127.8, 127.1, 125.3, 121.5, 67.3, 41.8, 39.3, 38.2, 35.3, 25.3, 23.6, 17.4.

IR (neat):  $\nu(\text{cm}^{-1})$ : 3408, 2952, 1761, 1655, 1484, 1137, 973, 696.

HRMS (ESI-TOF) calcd for  $\text{C}_{46}\text{H}_{36}\text{Br}_2\text{N}_2\text{O}_5^+$  ( $[\text{M}+\text{K}]^+$ ) = 893.0623, 895.0602, found 893.0627, 895.0610.

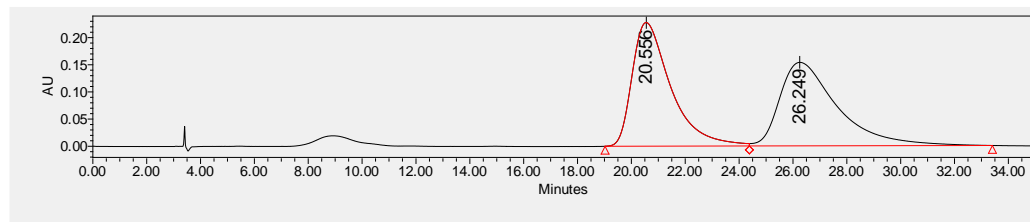

|   | Retention Time | Area     | % Area |
|---|----------------|----------|--------|
| 1 | 20.556         | 22747678 | 49.93  |
| 2 | 26.249         | 22809372 | 50.07  |

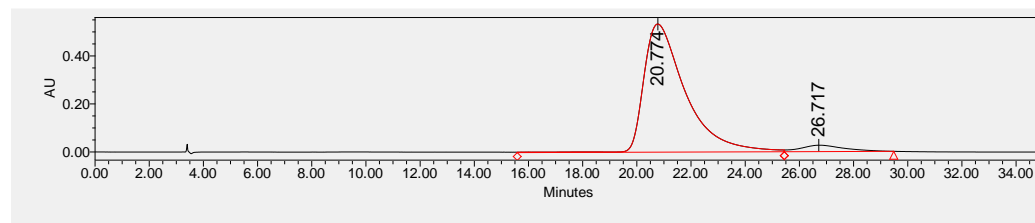

|   | Retention Time | Area     | % Area |
|---|----------------|----------|--------|
| 1 | 20.774         | 56675227 | 95.05  |
| 2 | 26.717         | 2954270  | 4.95   |

***N*-((3*R*,5*S*)-4-((*E*)-benzylidene)-3-(4-chlorobenzyl)-5-((*S*)-4-(4-chlorobenzyl)-5-oxo-2-phenyl-4,5-dihydrooxazol-4-yl)-2-oxo-3,4,5,6,7,8-hexahydro-2*H*-chromen-3-yl)benzamide (E15)**

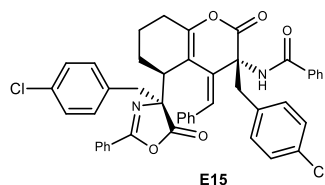

72.9 mg, 95% yield; white solid, melting point: 142.8 – 146.5 °C,  $[\alpha]_D^{19} = -225.4$  ( $c = 1.20$ ,  $\text{CH}_2\text{Cl}_2$ ).

Dissolved in *i*PrOH for HPLC; HPLC (Chiralcel IC, hexane/*i*PrOH = 98/2, flow rate 1.0 mL/min,  $\lambda = 254$  nm) retention time:  $t_{\text{major}} = 19.38$  min,  $t_{\text{minor}} = -$  min. er >99:1. dr >19:1.

**$^1\text{H NMR}$**  (400 MHz,  $\text{CDCl}_3$ )  $\delta$  7.86 – 7.69 (m, 4H), 7.58 – 7.15 (m, 14H), 7.10 – 6.98 (m, 4H), 6.96 – 6.84 (m, 3H), 4.52 – 4.27 (m, 1H), 3.57 – 3.45 (m, 1H), 3.23 – 3.14 (m, 1H), 3.00 – 2.92 (m, 1H), 2.64 – 2.43 (m, 2H), 1.94 – 1.73 (m, 4H), 1.61 – 1.45 (m, 1H).

$^{13}\text{C}$  NMR (101 MHz,  $\text{CDCl}_3$ )  $\delta$  178.6, 167.3, 160.1, 152.2, 137.4, 133.3, 132.8, 132.4, 132.2, 131.8, 131.4, 129.2, 128.9, 128.8, 128.7, 128.6, 128.3, 127.8, 127.1, 125.3, 67.5, 41.8, 39.3, 35.5, 29.8, 25.3, 23.6, 17.4.

IR (neat):  $\nu(\text{cm}^{-1})$ : 3409, 2926, 1762, 1655, 1487, 1093, 973, 696.

HRMS (ESI-TOF) calcd for  $\text{C}_{46}\text{H}_{36}\text{Cl}_2\text{N}_2\text{O}_5^+$  ( $[\text{M}+\text{H}]^+$ ) = 767.2074, 769.2045, found 767.2071, 769.2045.

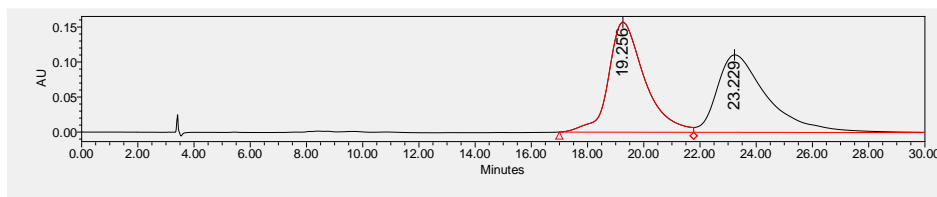

|   | Retention Time | Area     | % Area |
|---|----------------|----------|--------|
| 1 | 19.256         | 13989975 | 50.48  |
| 2 | 23.229         | 13724717 | 49.52  |

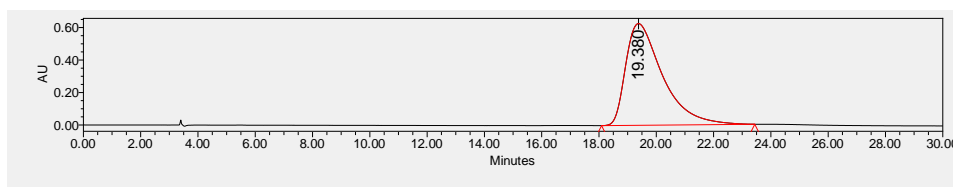

|   | Retention Time | Area     | % Area |
|---|----------------|----------|--------|
| 1 | 19.380         | 55946804 | 100.00 |

*N*-((3*R*,5*S*)-4-((*E*)-benzylidene)-2-oxo-5-((*S*)-5-oxo-2-phenyl-4-(thiophen-2-ylmethyl)-4,5-dihydrooxazol-4-yl)-3-(thiophen-2-ylmethyl)-3,4,5,6,7,8-hexahydro-2*H*-chromen-3-yl)benzamide (E16)

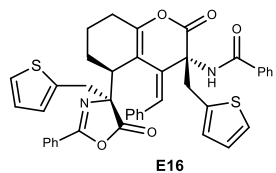

70.3 mg, 99% yield; white solid, melting point: 143.2 – 145.1 °C,  $[\alpha]_{\text{D}}^{20} = -259.1$  ( $c = 1.27$ ,  $\text{CH}_2\text{Cl}_2$ ).

Dissolved in *i*PrOH for SFC; SFC (Daicel chiralcel IC-3,  $\text{CO}_2/\text{IPROH} = 85/15$ , flow rate = 1.0 mL/min,  $\lambda = 254$  nm) retention time:  $t_{\text{major}} = 39.78$  min,  $t_{\text{minor}} = 36.13$  min. er = 99:1. dr >19:1.

**<sup>1</sup>H NMR** (400 MHz, CDCl<sub>3</sub>) δ 7.95 – 7.76 (m, 4H), 7.55 – 7.25 (m, 10H), 7.24 – 7.07 (m, 3H), 7.00 – 6.69 (m, 6H), 4.79 – 4.66 (m, 1H), 3.95 – 3.82 (m, 1H), 3.26 – 3.06 (m, 2H), 2.56 – 2.45 (m, 2H), 1.95 – 1.73 (m, 4H), 1.59 – 1.45 (m, 1H).

**<sup>13</sup>C NMR** (101 MHz, CDCl<sub>3</sub>) δ 178.4, 167.1, 161.0, 152.4, 137.2, 135.0, 132.8, 132.1, 130.7, 129.2, 128.8, 128.6, 128.2, 128.1, 127.8, 127.3, 126.7, 125.7, 125.6, 125.3, 67.5, 39.2, 36.7, 30.5, 29.8, 25.2, 23.5, 17.3.

**IR** (neat): ν(cm<sup>-1</sup>): 3408, 2922, 1762, 1654, 1480, 1134, 969, 694.

**HRMS** (ESI-TOF) calcd for C<sub>42</sub>H<sub>34</sub>N<sub>2</sub>O<sub>5</sub>S<sub>2</sub><sup>+</sup> ([M]+Na<sup>+</sup>) = 733.1801, found 733.1801.

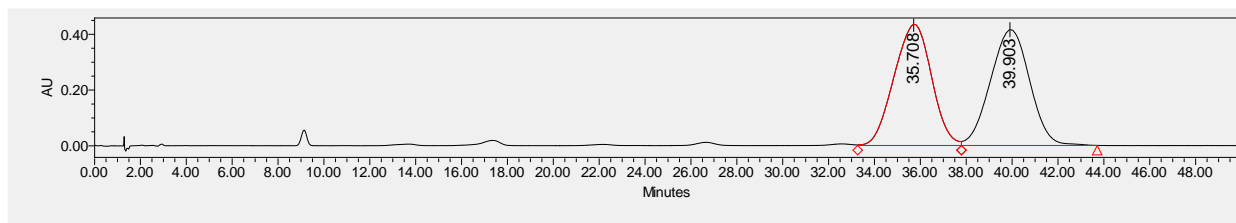

|   | Retention Time | Area     | % Area |
|---|----------------|----------|--------|
| 1 | 35.708         | 49362276 | 49.94  |
| 2 | 39.903         | 49483487 | 50.06  |

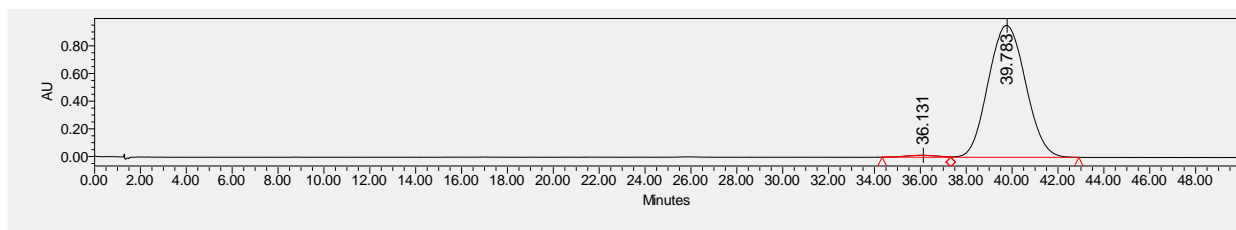

|   | Retention Time | Area      | % Area |
|---|----------------|-----------|--------|
| 1 | 36.131         | 1335484   | 1.22   |
| 2 | 39.783         | 108038629 | 98.78  |

***N*-((3*R*,5*S*)-4-((*E*)-benzylidene)-3-(naphthalen-1-ylmethyl)-5-((*S*)-4-(naphthalen-1-ylmethyl)-5-oxo-2-phenyl-4,5-dihydrooxazol-4-yl)-2-oxo-3,4,5,6,7,8-hexahydro-2H-chromen-3-yl)benzamide (E17)**



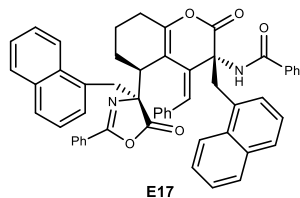

79.0 mg, 99% yield; white solid, melting point: 154.8 – 158.2 °C,  $[\alpha]_D^{20} = -104.1$  ( $c = 2.86$ ,  $\text{CH}_2\text{Cl}_2$ ).

Dissolved in *i*PrOH for SFC; SFC (Daicel chiralcel IC-3,  $\text{CO}_2/\text{MeOH} = 70/30$ , flow rate = 1.0 mL/min,  $\lambda = 254$  nm) retention time:  $t_{\text{major}} = 17.15$  min,  $t_{\text{minor}} = 19.31$  min. er = 99:1. dr >19:1.

$^1\text{H NMR}$  (400 MHz,  $\text{CDCl}_3$ )  $\delta$  8.32 – 8.15 (m, 1H), 8.02 – 7.69 (m, 4H), 7.58 – 6.83 (m, 26H), 5.43 – 4.80 (m, 1H), 4.31 – 4.16 (m, 1H), 3.98 – 3.76 (m, 2H), 3.60 – 3.27 (m, 2H), 2.73 – 2.50 (m, 2H), 2.37 – 2.02 (m, 2H), 1.77 – 1.55 (m, 1H).

$^{13}\text{C NMR}$  (101 MHz,  $\text{CDCl}_3$ )  $\delta$  178.9, 166.3, 159.3, 152.3, 138.7, 134.1, 133.6, 132.8, 132.2, 131.8, 130.6, 129.6, 129.2, 128.3, 128.2, 127.7, 127.4, 127.0, 126.2, 125.9, 125.5, 125.4, 125.2, 125.1, 125.0, 122.7, 64.8, 39.7, 38.9, 29.7, 25.7, 23.8, 17.4, 14.2.

**IR** (neat):  $\nu(\text{cm}^{-1})$ : 3415, 3055, 1770, 1655, 1478, 1141, 967, 696.

**HRMS** (ESI-TOF) calcd for  $\text{C}_{54}\text{H}_{42}\text{N}_2\text{O}_5^+$  ( $[\text{M}+\text{H}^+]$ ) = 799.3166, found 799.3174.

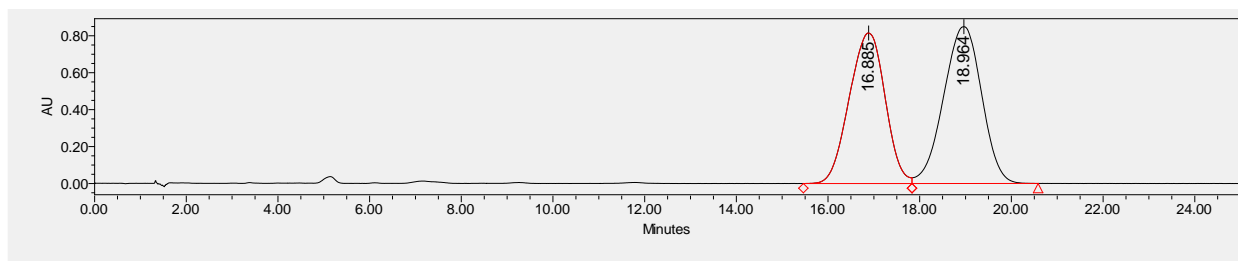

|   | Retention Time | Area     | % Area |
|---|----------------|----------|--------|
| 1 | 16.885         | 44205011 | 47.41  |
| 2 | 18.964         | 49038777 | 52.59  |

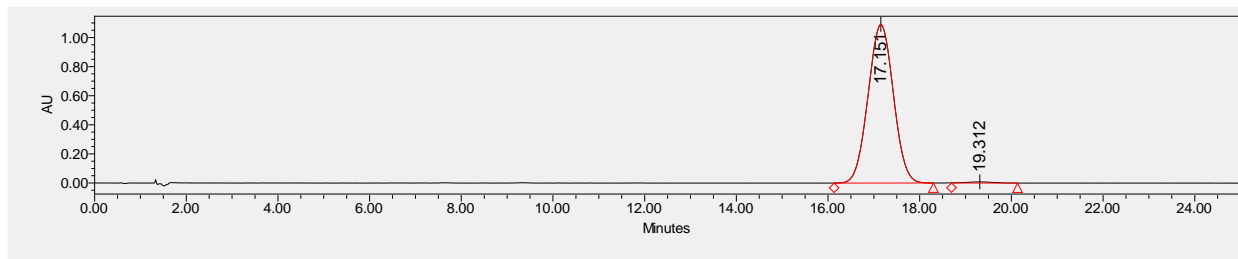

|   | Retention Time | Area     | % Area |
|---|----------------|----------|--------|
| 1 | 17.151         | 41761836 | 99.27  |
| 2 | 19.312         | 308641   | 0.73   |

***N*-((3*R*,5*S*)-4-((*E*)-benzylidene)-3-(naphthalen-2-ylmethyl)-5-((*S*)-4-(naphthalen-2-ylmethyl)-5-oxo-2-phenyl-4,5-dihydrooxazol-4-yl)-2-oxo-3,4,5,6,7,8-hexahydro-2H-chromen-3-yl)benzamide (E18)**

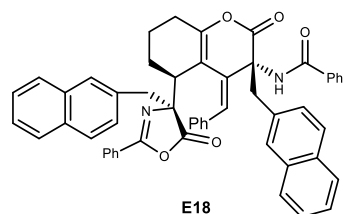

79.0 mg, 99% yield; white solid, melting point: 152.6 – 154.8 °C,  $[\alpha]_D^{20} = -216.9$  ( $c = 1.30$ ,  $\text{CH}_2\text{Cl}_2$ ).

Dissolved in *i*PrOH for SFC; SFC (Daicel chiralcel IC-3,  $\text{CO}_2/\text{MeOH} = 85/15$ , flow rate = 1.5 mL/min,  $\lambda = 254$  nm) retention time:  $t_{\text{major}} = 33.18$  min,  $t_{\text{minor}} = 36.72$  min. er = 99:1. dr >19:1.

$^1\text{H NMR}$  (400 MHz,  $\text{CDCl}_3$ )  $\delta$  7.82 – 7.52 (m, 10H), 7.53 – 7.24 (m, 16H), 7.24 – 7.11 (m, 4H), 6.95 (s, 1H), 4.84 – 4.51 (m, 1H), 3.88 – 3.70 (m, 1H), 3.36 – 3.17 (m, 2H), 2.74 – 2.48 (m, 2H), 2.26 – 1.73 (m, 4H), 1.66 – 1.48 (m, 1H).

$^{13}\text{C NMR}$  (101 MHz,  $\text{CDCl}_3$ )  $\delta$  178.7, 167.5, 159.9, 152.2, 137.6, 133.5, 133.1, 132.7, 132.5, 132.5, 132.0, 131.6, 129.4, 129.3, 128.8, 128.6, 128.5, 128.1, 127.9, 127.8, 127.7, 127.5, 127.1, 125.8, 125.7, 125.5, 67.8, 42.7, 39.4, 36.2, 29.8, 25.4, 23.7, 17.5.

**IR** (neat):  $\nu(\text{cm}^{-1})$ : 3408, 3055, 1761, 1655, 1480, 1136, 972, 696.

**HRMS** (ESI-TOF) calcd for  $\text{C}_{54}\text{H}_{42}\text{N}_2\text{O}_5^+$  ( $[\text{M}]+\text{Na}^+$ ) = 821.2986, found 821.2986.

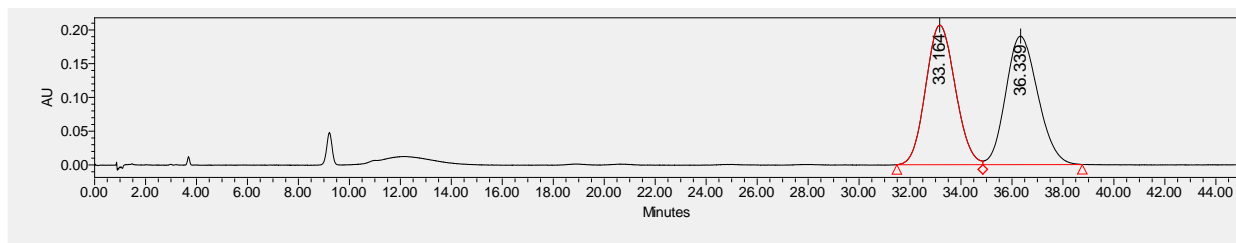

|   | Retention Time | Area     | % Area |
|---|----------------|----------|--------|
| 1 | 33.164         | 16663381 | 49.98  |
| 2 | 36.339         | 16674859 | 50.02  |

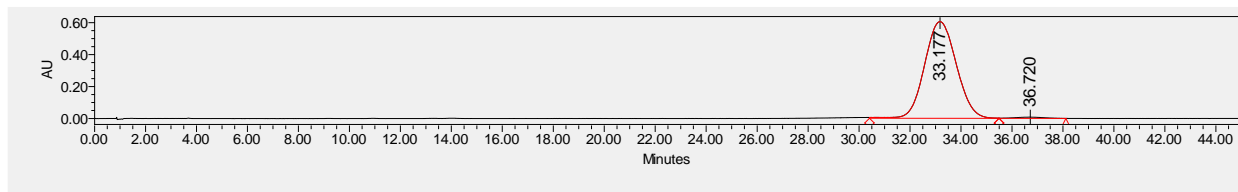

|   | Retention Time | Area     | % Area |
|---|----------------|----------|--------|
| 1 | 33.177         | 52416997 | 98.79  |
| 2 | 36.720         | 644596   | 1.21   |

***N*-((3*R*,5*S*)-3-allyl-5-((*S*)-4-allyl-5-oxo-2-phenyl-4,5-dihydrooxazol-4-yl)-4-((*E*)-benzylidene)-2-oxo-3,4,5,6,7,8-hexahydro-2*H*-chromen-3-yl)benzamide (E19)**

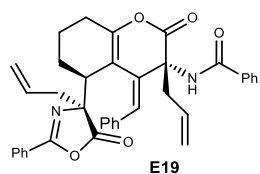

59.2 mg, 99% yield; pale yellow solid, melting point: 178.1 – 180.9 °C,  $[\alpha]_D^{19} = -218.6$  ( $c = 0.61$ ,  $\text{CH}_2\text{Cl}_2$ ).

Dissolved in *i*PrOH for SFC; SFC (Daicel chiralcel IC-3,  $\text{CO}_2/\text{IPROH} = 85/15$ , flow rate = 1.0 mL/min,  $\lambda = 254$  nm) retention time:  $t_{\text{major}} = 29.04$  min,  $t_{\text{minor}} = 32.77$  min. er = 99:1. dr >19:1.

**$^1\text{H}$  NMR** (400 MHz,  $\text{CDCl}_3$ )  $\delta$  7.93 – 7.74 (m, 4H), 7.59 – 7.37 (m, 6H), 7.36 – 7.19 (m, 6H), 6.61 (s, 1H), 6.06 – 5.82 (m, 1H), 5.42 – 5.27 (m, 3H), 5.07 – 4.93 (m, 2H), 3.09 – 3.01 (m, 1H), 2.82 – 2.67 (m, 1H), 2.50 – 2.32 (m, 3H), 2.23 – 2.11 (m, 1H), 1.90 – 1.82 (m, 1H).

**$^{13}\text{C}$  NMR** (101 MHz,  $\text{CDCl}_3$ )  $\delta$  178.5, 166.0, 159.7, 152.4, 138.2, 132.9, 132.1, 131.5, 130.0, 129.2, 129.0, 128.8, 128.2, 127.9, 127.6, 127.2, 125.7, 121.1, 75.8, 40.1, 37.8, 25.4, 23.1, 17.2.

**IR** (neat):  $\nu(\text{cm}^{-1})$ : 3414, 2924, 1768, 1654, 1480, 1152, 929, 698.

**HRMS** (ESI-TOF) calcd for  $\text{C}_{38}\text{H}_{34}\text{N}_2\text{O}_5^+$  ( $[\text{M}+\text{H}]^+$ ) = 599.2540, found 599.2540.

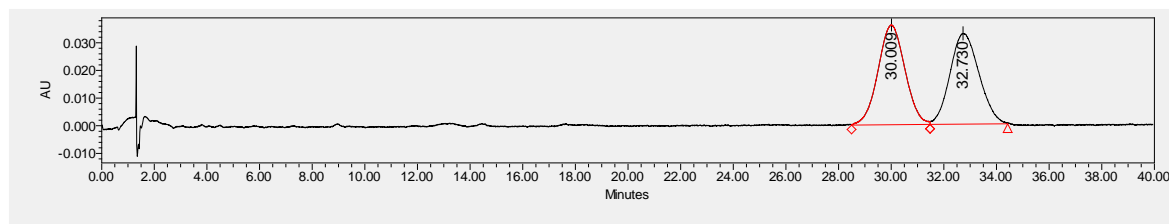

|   | Retention Time | Area    | % Area |
|---|----------------|---------|--------|
| 1 | 30.009         | 2562004 | 50.45  |
| 2 | 32.730         | 2515810 | 49.55  |

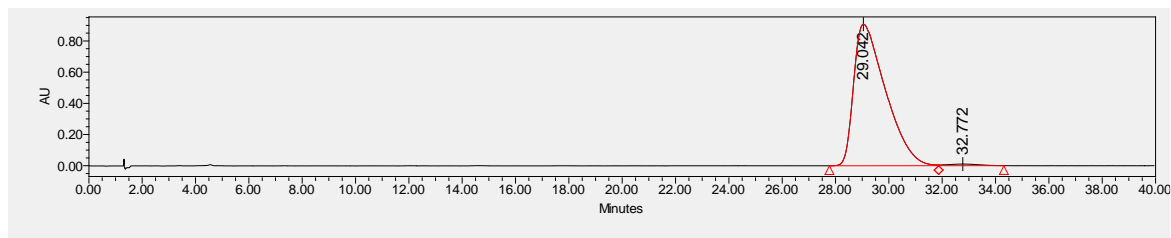

|   | Retention Time | Area     | % Area |
|---|----------------|----------|--------|
| 1 | 29.042         | 75240821 | 98.83  |
| 2 | 32.772         | 890407   | 1.17   |

***N*-((3*R*,5*S*)-4-((*E*)-benzylidene)-3-methyl-5-((*S*)-4-methyl-5-oxo-2-phenyl-4,5-dihydrooxazol-4-yl)-2-oxo-3,4,5,6,7,8-hexahydro-2*H*-chromen-3-yl)benzamide (E20)**

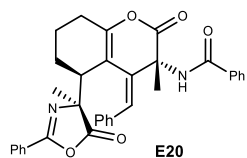

45.3 mg, 83% yield; white solid, melting point: 199.3 – 201.5 °C,  $[\alpha]_D^{20} = -315.8$  ( $c = 0.79$ ,  $\text{CH}_2\text{Cl}_2$ ).

Dissolved in *i*PrOH for SFC; SFC (Daicel chiralcel IA-3,  $\text{CO}_2/\text{MeOH} = 85/15$ , flow rate = 1.5 mL/min,  $\lambda = 254$  nm) retention time:  $t_{\text{major}} = 7.71$  min,  $t_{\text{minor}} = 9.68$  min. er = 98:2. dr >19:1.

**$^1\text{H}$  NMR** (400 MHz,  $\text{CDCl}_3$ )  $\delta$  7.96 – 7.79 (m, 4H), 7.60 – 7.37 (m, 6H), 7.34 – 7.15 (m, 6H), 6.68 (s, 1H), 3.07 – 2.92 (m, 1H), 2.52 – 2.31 (m, 2H), 2.04 – 1.90 (m, 4H), 1.84 – 1.73 (m, 3H), 1.35 (s, 3H).

**$^{13}\text{C}$  NMR** (101 MHz,  $\text{CDCl}_3$ )  $\delta$  180.0, 166.4, 159.5, 152.0, 138.1, 133.8, 132.9, 132.1, 129.1, 129.0, 128.7, 128.3, 127.9, 127.6, 127.3, 126.0, 71.4, 61.5, 38.6, 25.4, 24.0, 23.1, 17.2.

**IR** (neat):  $\nu(\text{cm}^{-1})$ : 3326, 2929, 1771, 1652, 1522, 1190, 1003, 696.

**HRMS** (ESI-TOF) calcd for  $\text{C}_{34}\text{H}_{30}\text{N}_2\text{O}_5^+$  ( $[\text{M}+\text{K}^+]$ ) = 585.1786, found 585.1786.

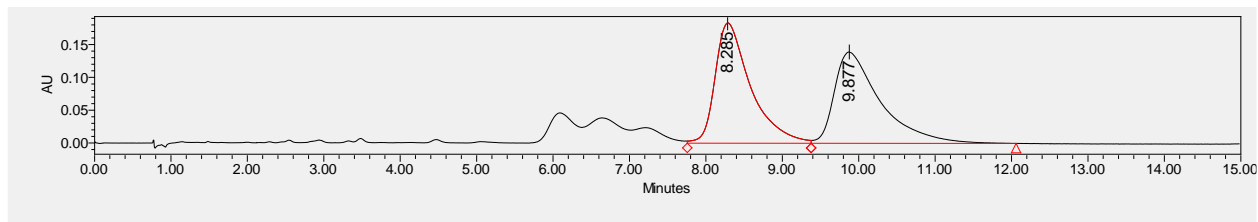

|   | Retention Time | Area    | % Area |
|---|----------------|---------|--------|
| 1 | 8.285          | 5918096 | 50.51  |
| 2 | 9.877          | 5797628 | 49.49  |

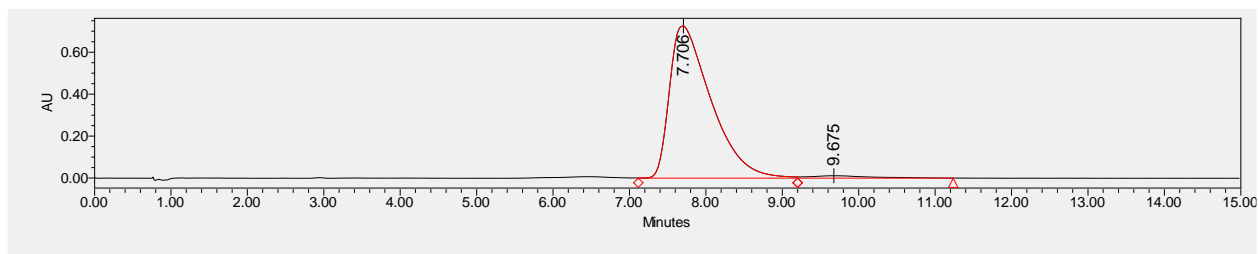

|   | Retention Time | Area     | % Area |
|---|----------------|----------|--------|
| 1 | 7.706          | 27395395 | 97.74  |
| 2 | 9.675          | 632160   | 2.26   |

***N*-((3*R*,5*S*)-4-((*E*)-benzylidene)-3-isopropyl-5-((*S*)-4-isopropyl-5-oxo-2-phenyl-4,5-dihydrooxazol-4-yl)-2-oxo-3,4,5,6,7,8-hexahydro-2*H*-chromen-3-yl)benzamide (E21)**

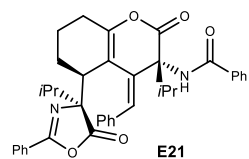

52.4 mg, 87% yield; white solid, melting point: 240.2 – 243.4 °C,  $[\alpha]_D^{20} = -187.8$  ( $c = 0.91$ ,  $\text{CH}_2\text{Cl}_2$ ).

Dissolved in *i*PrOH for SFC; SFC (Daicel chiralcel IA-3,  $\text{CO}_2/\text{MeOH} = 90/10$ , flow rate = 1.0 mL/min,  $\lambda = 254$  nm) retention time:  $t_{\text{major}} = 20.37$  min,  $t_{\text{minor}} = 14.78$  min. er = 98:2. dr >19:1.

$^1\text{H NMR}$  (400 MHz,  $\text{CDCl}_3$ )  $\delta$  7.93 – 7.86 (m, 2H), 7.81 – 7.69 (m, 2H), 7.61 – 7.25 (m, 10H), 7.25 – 7.18 (m, 1H), 6.51 (s, 1H), 6.34 (s, 1H), 3.22 – 3.13 (m, 1H), 2.58 – 2.30 (m, 3H), 2.15 – 2.06 (m, 1H), 1.96 – 1.68 (m, 4H), 1.25 – 1.20 (m, 3H), 0.74 – 0.51 (m, 9H).

$^{13}\text{C}$  NMR (101 MHz,  $\text{CDCl}_3$ )  $\delta$  177.7, 166.7, 159.4, 152.0, 138.8, 134.2, 132.8, 132.0, 129.3, 129.1, 128.9, 128.7, 128.2, 127.9, 127.8, 127.4, 127.1, 126.7, 125.9, 108.8, 78.5, 67.5, 35.0, 32.2, 31.3, 25.4, 23.2, 17.8, 17.2, 17.2, 16.7, 14.1.

IR (neat):  $\nu(\text{cm}^{-1})$ : 3345, 2970, 1773, 1654, 1482, 1165, 1020, 694.

HRMS (ESI-TOF) calcd for  $\text{C}_{38}\text{H}_{38}\text{N}_2\text{O}_5^+$  ( $[\text{M}+\text{K}^+]$ ) = 641.2412, found 641.2412.

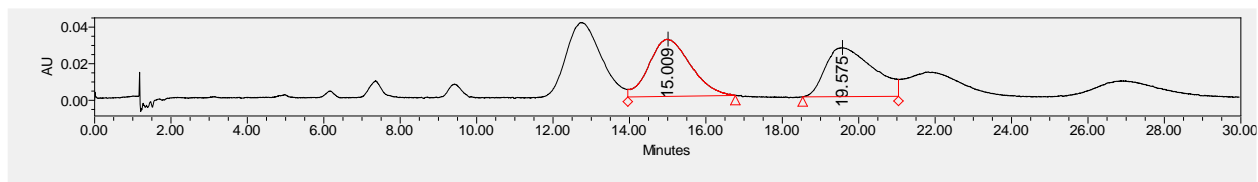

|   | Retention Time | Area    | % Area |
|---|----------------|---------|--------|
| 1 | 15.009         | 2356495 | 50.12  |
| 2 | 19.575         | 2345363 | 49.88  |

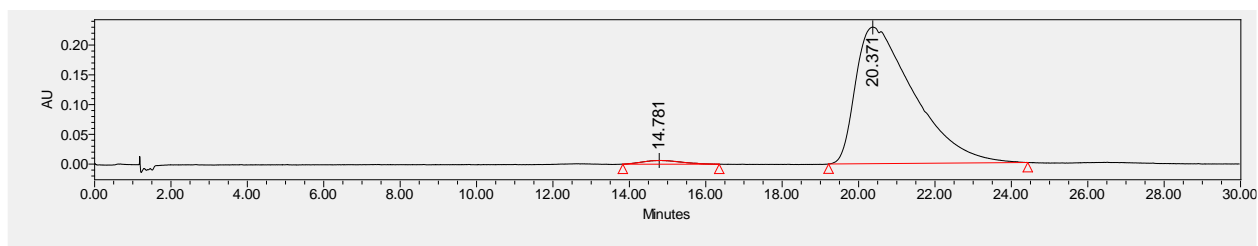

|   | Retention Time | Area     | % Area |
|---|----------------|----------|--------|
| 1 | 14.781         | 437069   | 1.77   |
| 2 | 20.371         | 24277643 | 98.23  |

*N*-((3*R*,5*S*)-4-((*E*)-benzylidene)-3-isobutyl-5-((*S*)-4-isobutyl-5-oxo-2-phenyl-4,5-dihydrooxazol-4-yl)-2-oxo-3,4,5,6,7,8-hexahydro-2*H*-chromen-3-yl)benzamide (E22)

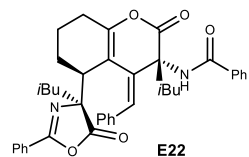

57.3 mg, 91% yield; yellow solid, melting point: 186.7 – 188.4 °C,  $[\alpha]_{\text{D}}^{20} = -313.7$  ( $c = 0.84$ ,  $\text{CH}_2\text{Cl}_2$ ).

Dissolved in *i*PrOH for SFC; SFC (Daicel chiralcel IC-3,  $\text{CO}_2/\text{MeOH} = 90/10$ , flow rate = 1.5 mL/min,  $\lambda = 254$  nm) retention time:  $t_{\text{major}} = 12.81$  min,  $t_{\text{minor}} = 9.43$  min. er = 98:2. dr >19:1.

**<sup>1</sup>H NMR** (400 MHz, CDCl<sub>3</sub>) δ 8.09 – 7.87 (m, 4H), 7.62 – 6.93 (m, 12H), 6.68 (s, 1H), 3.29 – 2.82 (m, 1H), 2.73 – 2.63 (m, 1H), 2.48 – 2.36 (m, 2H), 2.17 – 1.59 (m, 7H), 1.46 – 1.29 (m, 2H), 1.08 – 0.75 (m, 12H).

**<sup>13</sup>C NMR** (101 MHz, CDCl<sub>3</sub>) δ 180.1, 166.4, 159.2, 151.8, 138.0, 134.9, 132.7, 131.9, 129.1, 129.0, 128.8, 128.5, 128.3, 127.7, 127.2, 126.1, 75.2, 65.8, 44.6, 39.8, 29.8, 25.1, 25.0, 24.9, 24.5, 24.3, 23.5, 23.3, 22.8, 17.5.

**IR** (neat): ν(cm<sup>-1</sup>): 3411, 2957, 1760, 1656, 1483, 1157, 957, 699.

**HRMS** (ESI-TOF) calcd for C<sub>40</sub>H<sub>42</sub>N<sub>2</sub>O<sub>5</sub><sup>+</sup> ([M]+H<sup>+</sup>) = 631.3166, found 631.3165.

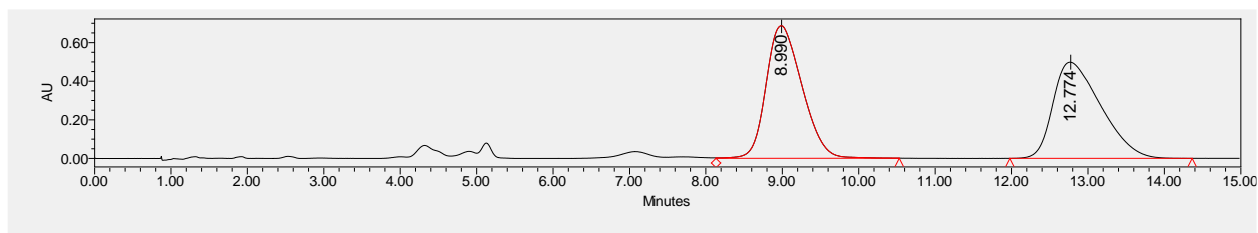

|   | Retention Time | Area     | % Area |
|---|----------------|----------|--------|
| 1 | 8.990          | 22363336 | 50.90  |
| 2 | 12.774         | 21571120 | 49.10  |

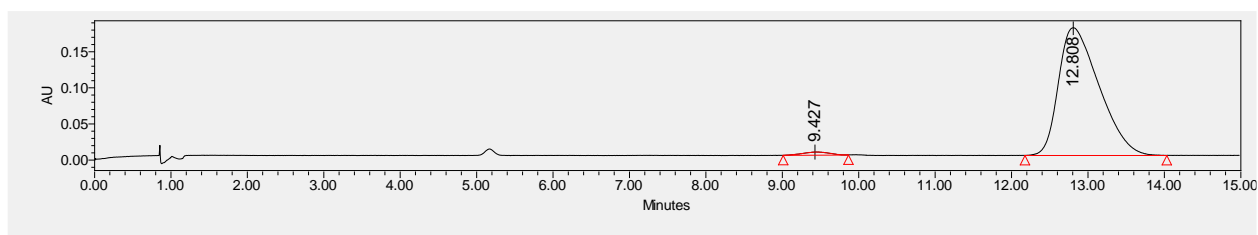

|   | Retention Time | Area    | % Area |
|---|----------------|---------|--------|
| 1 | 9.427          | 106689  | 1.61   |
| 2 | 12.808         | 6522254 | 98.39  |

***N*-((3*R*,5*S*)-3-benzyl-5-((*S*)-4-benzyl-2-(4-methoxyphenyl)-5-oxo-4,5-dihydrooxazol-4-yl)-4-((*E*)-benzylidene)-2-oxo-3,4,5,6,7,8-hexahydro-2H-chromen-3-yl)-4-methoxybenzamide (E23)**

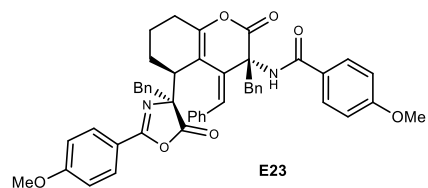

75.1 mg, 99% yield; pale yellow solid, melting point: 147.2 – 148.8 °C,  $[\alpha]_D^{19} = -225.3$  ( $c = 1.37$ ,  $\text{CH}_2\text{Cl}_2$ ).

Dissolved in *i*PrOH for SFC; SFC (Daicel chiralcel IC-3,  $\text{CO}_2/\text{IPROH} = 80/20$ , flow rate = 1.5 mL/min,  $\lambda = 254$  nm) retention time:  $t_{\text{major}} = 18.82$  min,  $t_{\text{minor}} = 16.65$  min. er = 99:1. dr >19:1.

**$^1\text{H NMR}$**  (400 MHz,  $\text{CDCl}_3$ )  $\delta$  7.81 – 7.62 (m, 4H), 7.39 – 7.25 (m, 4H), 7.26 – 7.14 (m, 6H), 7.07 – 6.73 (m, 11H), 4.61 – 4.36 (m, 1H), 3.81 (s, 3H), 3.75 (s, 3H), 3.63 – 3.46 (m, 1H), 3.24 – 3.16 (m, 1H), 3.01 – 2.94 (m, 1H), 2.61 – 2.44 (m, 2H), 1.97 – 1.78 (m, 4H), 1.58 – 1.47 (m, 1H).

**$^{13}\text{C NMR}$**  (101 MHz,  $\text{CDCl}_3$ )  $\delta$  178.8, 166.7, 163.0, 162.6, 159.4, 152.0, 137.7, 134.1, 130.5, 130.3, 129.6, 129.2, 129.0, 128.4, 127.9, 127.3, 127.1, 117.9, 114.1, 113.9, 110.1, 67.7, 55.5, 55.5, 42.6, 39.4, 36.0, 29.8, 25.3, 23.6, 17.4.

**IR** (neat):  $\nu(\text{cm}^{-1})$ : 3413, 2931, 1762, 1653, 1491, 1257, 1028, 699.

**HRMS** (ESI-TOF) calcd for  $\text{C}_{48}\text{H}_{42}\text{N}_2\text{O}_7^+$  ( $[\text{M}]+\text{K}^+$ ) = 797.2624, found 797.2625.

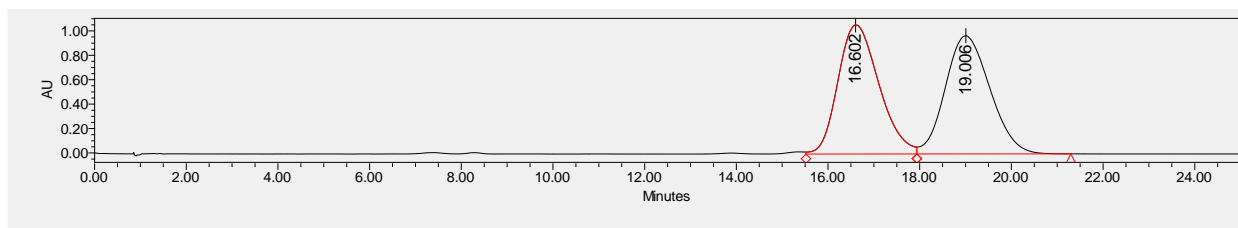

|   | Retention Time | Area     | % Area |
|---|----------------|----------|--------|
| 1 | 16.602         | 65650707 | 50.01  |
| 2 | 19.006         | 65626346 | 49.99  |

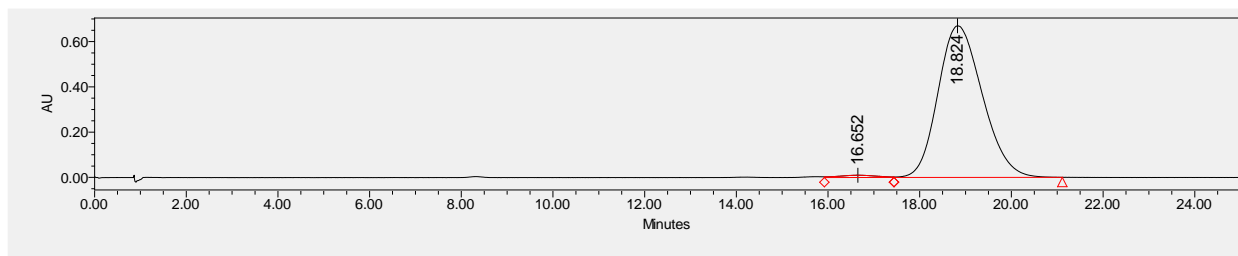



|   | Retention Time | Area     | % Area |
|---|----------------|----------|--------|
| 1 | 16.652         | 564602   | 1.24   |
| 2 | 18.824         | 45018366 | 98.76  |

***N*-((3*R*,5*S*)-3-benzyl-5-((*S*)-4-benzyl-2-(3,5-dimethylphenyl)-5-oxo-4,5-dihydrooxazol-4-yl)-4-((*E*)-benzylidene)-2-oxo-3,4,5,6,7,8-hexahydro-2*H*-chromen-3-yl)-3,5-dimethylbenzamide (E24)**

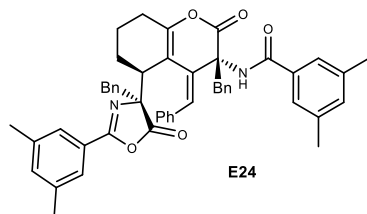

74.7 mg, 99% yield; white solid, melting point: 136.5 – 139.2 °C,  $[\alpha]_D^{20} = -226.1$  ( $c = 1.26$ ,  $\text{CH}_2\text{Cl}_2$ ).

Dissolved in *i*PrOH for SFC; SFC (Daicel chiralcel IC-3,  $\text{CO}_2/\text{IPROH} = 80/20$ , flow rate = 1.5 mL/min,  $\lambda = 254$  nm) retention time:  $t_{\text{major}} = 22.64$  min,  $t_{\text{minor}} = 19.38$  min. er = 99:1. dr >19:1.

$^1\text{H NMR}$  (400 MHz,  $\text{CDCl}_3$ )  $\delta$  7.43 – 7.10 (m, 16H), 7.07 – 6.98 (m, 6H), 6.86 (s, 1H), 4.69 – 4.42 (m, 1H), 3.66 – 3.51 (m, 1H), 3.23 – 3.19 (m, 1H), 3.01 – 2.94 (m, 1H), 2.63 – 2.43 (m, 2H), 2.38 – 2.08 (m, 12H), 1.93 – 1.74 (m, 3H), 1.59 – 1.48 (m, 1H), 1.33 – 1.22 (m, 1H).

$^{13}\text{C NMR}$  (101 MHz,  $\text{CDCl}_3$ )  $\delta$  178.7, 167.5, 160.1, 152.1, 138.5, 136.1, 134.8, 134.3, 134.0, 133.6, 130.5, 130.3, 129.3, 128.5, 128.0, 127.3, 127.2, 125.5, 125.4, 124.9, 67.8, 42.6, 39.5, 36.1, 29.8, 25.3, 23.7, 21.3, 21.1, 17.4.

**IR** (neat):  $\nu(\text{cm}^{-1})$ : 3411, 2921, 1763, 1653, 1494, 1137, 908, 699.

**HRMS** (ESI-TOF) calcd for  $\text{C}_{50}\text{H}_{46}\text{N}_2\text{O}_5^+$  ( $[\text{M}]+\text{K}^+$ ) = 793.3038, found 793.3045.

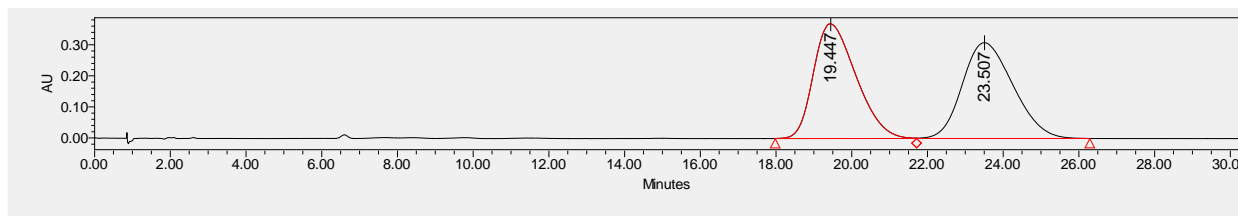

|   | Retention Time | Area     | % Area |
|---|----------------|----------|--------|
| 1 | 19.447         | 28796261 | 50.03  |
| 2 | 23.507         | 28759470 | 49.97  |

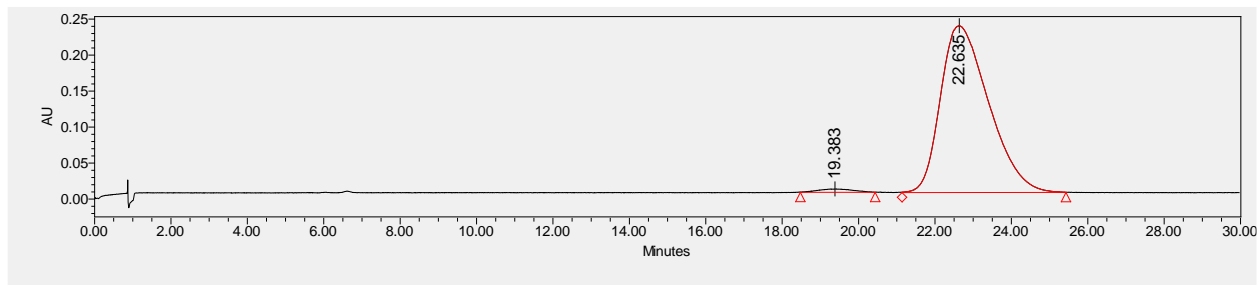

|   | Retention Time | Area     | % Area |
|---|----------------|----------|--------|
| 1 | 19.383         | 301442   | 1.47   |
| 2 | 22.635         | 20272957 | 98.53  |

***N*-((3*R*,5*S*)-3-benzyl-5-((*S*)-4-benzyl-2-(4-chlorophenyl)-5-oxo-4,5-dihydrooxazol-4-yl)-4-((*E*)-benzylidene)-2-oxo-3,4,5,6,7,8-hexahydro-2*H*-chromen-3-yl)-4-chlorobenzamide (E25)**

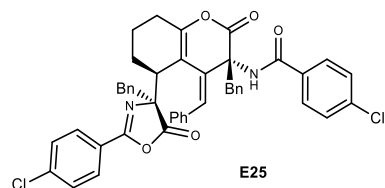

76.0 mg, 99% yield; white solid, melting point: 150.8 – 154.6 °C,  $[\alpha]_D^{19} = -211.9$  ( $c = 2.87$ ,  $\text{CH}_2\text{Cl}_2$ ).

Dissolved in *i*PrOH for HPLC; HPLC (Chiralcel IA, hexane/*i*PrOH = 80/20, flow rate 1.0 mL/min,  $\lambda = 254$  nm) retention time:  $t_{\text{major}} = 15.61$  min,  $t_{\text{minor}} = 10.32$  min. er = 99:1. dr >19:1.

**<sup>1</sup>H NMR** (400 MHz,  $\text{CDCl}_3$ )  $\delta$  7.71 – 7.61 (m, 4H), 7.40 – 7.25 (m, 7H), 7.26 – 7.10 (m, 7H), 7.06 – 6.93 (m, 6H), 6.83 (s, 1H), 4.57 – 4.22 (m, 1H), 3.61 – 3.43 (m, 1H), 3.22 – 3.15 (m, 1H), 3.04 – 2.96 (m, 1H), 2.58 – 2.47 (m, 2H), 2.00 – 1.82 (m, 4H), 1.60 – 1.48 (m, 1H).

**<sup>13</sup>C NMR** (101 MHz,  $\text{CDCl}_3$ )  $\delta$  178.3, 166.1, 158.9, 152.1, 138.9, 138.2, 133.7, 131.8, 130.4, 130.1, 129.1, 129.1, 129.0, 128.5, 128.5, 128.3, 128.1, 128.0, 127.3, 124.0, 67.6, 42.4, 39.0, 36.0, 29.8, 25.3, 23.5, 17.4.

**IR** (neat):  $\nu(\text{cm}^{-1})$ : 3407, 2951, 1761, 1654, 1479, 1089, 964, 699.

**HRMS** (ESI-TOF) calcd for  $\text{C}_{46}\text{H}_{36}\text{Cl}_2\text{N}_2\text{O}_5^+$  ( $[\text{M}+\text{H}]^+$ ) = 767.2074, 769.2045, found 767.2079, 769.2046.

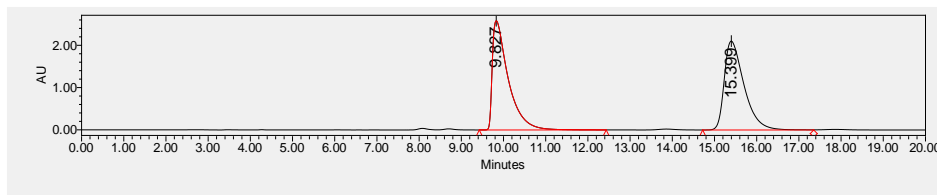

|   | Retention Time | Area     | % Area |
|---|----------------|----------|--------|
| 1 | 9.827          | 67508564 | 49.70  |
| 2 | 15.399         | 68320111 | 50.30  |

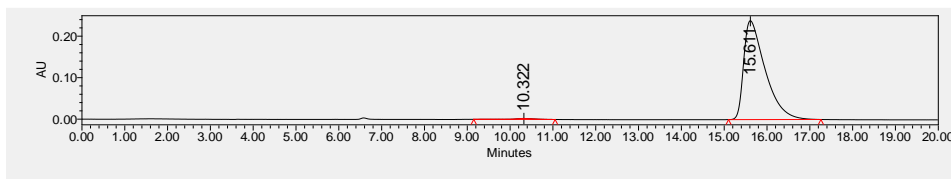

|   | Retention Time | Area    | % Area |
|---|----------------|---------|--------|
| 1 | 10.322         | 84637   | 1.01   |
| 2 | 15.611         | 8304589 | 98.99  |

***N*-((3*R*,5*S*)-3-benzyl-5-((*S*)-4-benzyl-5-oxo-2-phenyl-4,5-dihydrooxazol-4-yl)-4-((*E*)-benzylidene)-2-oxo-2,3,4,5,6,7-hexahydrocyclopenta[*b*]pyran-3-yl)benzamide (E27)**

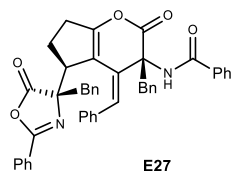

28.8 mg, 42% yield; pale yellow solid, melting point: 134.3 – 137.8 °C,  $[\alpha]_D^{20} = -118.5$  ( $c = 0.44$ ,  $\text{CH}_2\text{Cl}_2$ ).

Dissolved in *i*PrOH for SFC; SFC (Daicel chiralcel IC-3,  $\text{CO}_2/\text{MeOH} = 85/15$ , flow rate = 1.5 mL/min,  $\lambda = 254$  nm) retention time:  $t_{\text{major}} = 16.99$  min,  $t_{\text{minor}} = 19.94$  min. er = 97:3. dr >19:1.

**$^1\text{H NMR}$**  (400 MHz,  $\text{CDCl}_3$ )  $\delta$  7.73 – 7.60 (m, 4H), 7.52 – 7.31 (m, 11H), 7.23 – 7.10 (m, 5H), 7.10 – 6.85 (m, 6H), 6.48 (s, 1H), 3.92 – 3.77 (m, 1H), 3.59 – 3.47 (m, 1H), 3.21 – 3.10 (m, 1H), 2.96 – 2.82 (m, 2H), 2.60 – 2.48 (m, 1H), 2.30 – 2.10 (m, 2H), 1.27 – 1.22 (m, 1H).

**$^{13}\text{C NMR}$**  (101 MHz,  $\text{CDCl}_3$ )  $\delta$  178.5, 168.3, 159.9, 156.4, 137.6, 134.1, 132.6, 132.1, 130.9, 130.3, 129.6, 129.1, 128.8, 128.7, 128.1, 128.0, 127.9, 127.2, 127.1, 125.7, 77.6, 47.6, 40.4, 29.8, 29.6, 24.1.

**IR** (neat):  $\nu(\text{cm}^{-1})$ : 3428, 2926, 1781, 1656, 1479, 1289, 971, 698.

HRMS (ESI-TOF) calcd for  $C_{45}H_{36}N_2O_5^+$  ( $[M]+Na^+$ ) = 707.2516, found 707.2516.

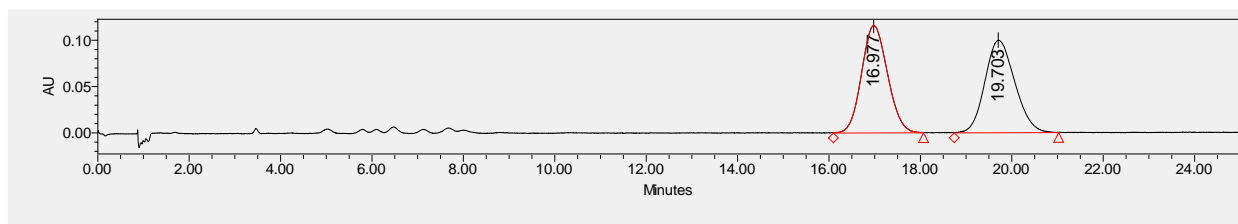

|   | Retention Time | Area    | % Area |
|---|----------------|---------|--------|
| 1 | 16.977         | 4572549 | 50.17  |
| 2 | 19.703         | 4540778 | 49.83  |

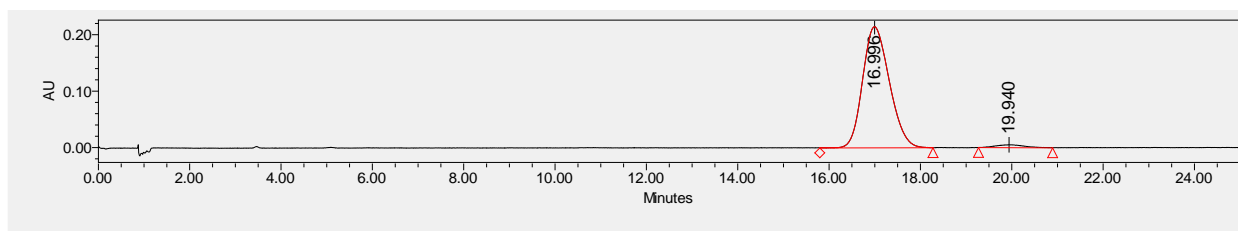

|   | Retention Time | Area    | % Area |
|---|----------------|---------|--------|
| 1 | 16.996         | 8735853 | 97.45  |
| 2 | 19.940         | 228815  | 2.55   |

**Methyl (*R,E*)-2-benzamido-3-((1*R*,2*S*)-2-((*S*)-2-benzamido-1-methoxy-1-oxo-3-phenylpropan-2-yl)-6-oxocyclohexyl)-2-benzyl-4-phenylbut-3-enoate (F1)**

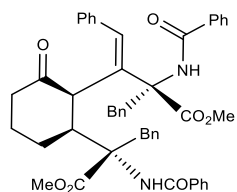

F1

137.3 mg, 90% yield; white solid, melting point: 63.4 – 65.9 °C,  $[\alpha]_D^{23} = -34.9$  ( $c = 1.25$ ,  $CH_2Cl_2$ ).

Dissolved in *i*PrOH for SFC; SFC (Daicel chiralcel AD-3,  $CO_2/MeOH = 85/15$ , flow rate = 1.5 mL/min,  $\lambda = 254$  nm) retention time:  $t_{major} = 3.58$  min. er >99:1. dr >19:1.

**<sup>1</sup>H NMR** (400 MHz, CDCl<sub>3</sub>) δ 7.45 – 7.35 (m, 2H), 7.36 – 7.24 (m, 12H), 7.23 – 7.14 (m, 6H), 7.15 – 7.08 (m, 4H), 7.09 – 7.05 (m, 4H), 4.35 – 4.29 (m, 2H), 4.01 – 3.93 (m, 4H), 3.69 – 3.60 (m, 2H), 3.45 – 3.39 (m, 2H), 3.36 (s, 6H), 2.44 – 2.33 (m, 2H).

**<sup>13</sup>C NMR** (101 MHz, CDCl<sub>3</sub>) δ 199.4, 170.4, 168.4, 141.6, 138.2, 136.7, 136.5, 136.2, 130.5, 129.2, 128.8, 128.7, 128.5, 128.3, 127.1, 126.9, 126.6, 79.3, 66.9, 52.6, 41.5, 36.2, 31.7, 30.9, 20.7.

**IR** (neat): ν(cm<sup>-1</sup>): 3030, 2949, 2360, 1741, 1632, 1398, 1232, 702, 489.

**HRMS** (ESI-TOF) calcd for C<sub>48</sub>H<sub>46</sub>N<sub>2</sub>O<sub>7</sub><sup>+</sup> ([M]+Na<sup>+</sup>) = 785.3197, found 785.3198.

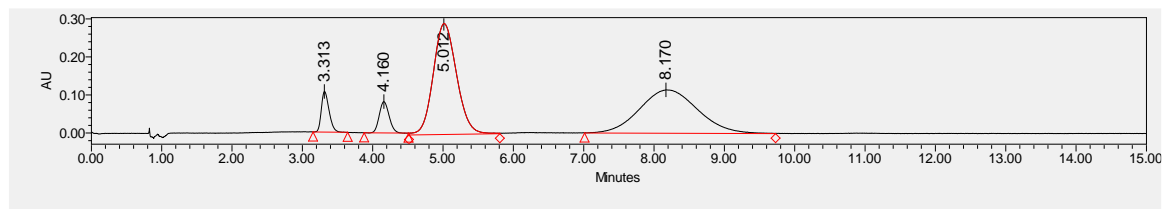

|   | Retention Time | Area    | % Area |
|---|----------------|---------|--------|
| 1 | 3.313          | 814683  | 5.47   |
| 2 | 4.160          | 800975  | 5.38   |
| 3 | 5.012          | 6717973 | 45.12  |
| 4 | 8.170          | 6554836 | 44.03  |

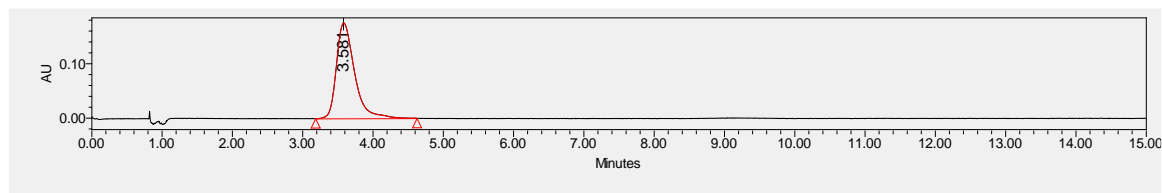

|   | Retention Time | Area    | % Area |
|---|----------------|---------|--------|
| 1 | 3.581          | 3184177 | 100.00 |

*N*-((2*S*,3*R*,5*S*)-5-((*S*)-2-benzamido-1-(4-chlorophenyl)-3-hydroxypropan-2-yl)-4-((*E*)-benzylidene)-3-(4-chlorobenzyl)-2-hydroxy-3,4,5,6,7,8-hexahydro-2H-chromen-3-yl)benzamide (G1)

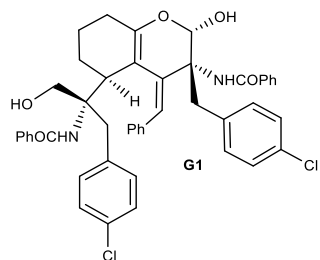

146.8 mg, 95% yield; white solid, melting point: 138.7 – 141.0 °C,  $[\alpha]_D^{22} = -170.7$  ( $c = 1.31$ ,  $\text{CH}_2\text{Cl}_2$ ).

Dissolved in *i*PrOH for SFC; SFC (Daicel chiralcel IA-3,  $\text{CO}_2/\text{EtOH} = 80/20$ , flow rate = 1.5 mL/min,  $\lambda = 254$  nm) retention time:  $t_{\text{major}} = 21.63$  min,  $t_{\text{minor}} = -$  min. er >99:1. dr >19:1.

**$^1\text{H}$  NMR** (400 MHz, Acetone- $d_6$ )  $\delta$  7.88 – 7.79 (m, 4H), 7.59 – 7.44 (m, 6H), 7.29 – 7.05 (m, 12H), 7.01 – 6.97 (m, 2H), 6.92 – 6.80 (m, 2H), 6.43 (s, 1H), 6.39 – 6.35 (m, 1H), 5.14 – 5.11 (m, 1H), 4.95 – 4.90 (m, 1H), 4.65 – 4.59 (m, 1H), 4.13 – 4.07 (m, 1H), 3.71 – 3.66 (m, 1H), 3.59 – 3.51 (m, 1H), 3.40 – 3.35 (m, 1H), 3.08 – 2.98 (m, 2H), 2.94 – 2.88 (m, 3H), 2.14 – 2.08 (m, 2H).

**$^{13}\text{C}$  NMR** (101 MHz, Acetone- $d_6$ )  $\delta$  170.0, 169.1, 153.3, 140.4, 138.0, 137.7, 137.6, 137.6, 134.3, 134.2, 133.9, 133.4, 133.3, 130.7, 130.7, 130.5, 129.9, 129.8, 129.6, 129.0, 128.8, 128.7, 126.0, 107.8, 94.9, 69.1, 67.3, 64.5, 40.1, 38.8, 37.2, 28.5, 25.6, 20.7.

**IR** (neat):  $\nu(\text{cm}^{-1})$ : 3408, 3059, 2940, 2859, 1647, 1519, 1299, 1067, 835, 703.

**HRMS** (ESI-TOF) calcd for  $\text{C}_{46}\text{H}_{42}\text{Cl}_2\text{N}_2\text{O}_5^+$  ( $[\text{M}]+\text{H}^+$ ) = 773.2544, 775.2514, found 773.2534, 775.2524.

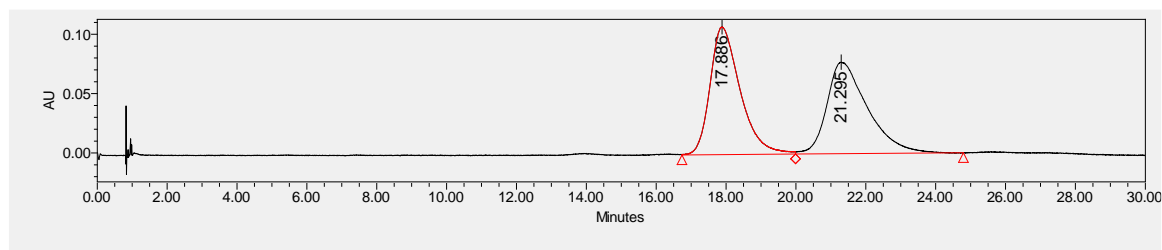

|   | Retention Time | Area    | % Area |
|---|----------------|---------|--------|
| 1 | 17.886         | 6433856 | 50.91  |
| 2 | 21.295         | 6204618 | 49.09  |

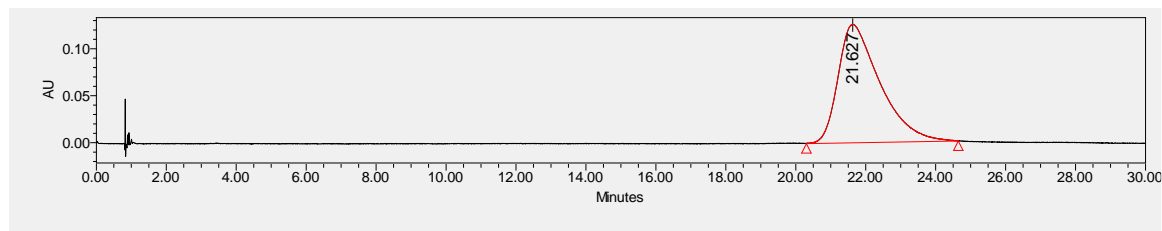

|   | Retention Time | Area     | % Area |
|---|----------------|----------|--------|
| 1 | 21.627         | 10473834 | 100.00 |

## 12. References

- Z. P. Yu, X. H. Liu, L. Zhou, L. L. Lin, X. M. Feng, *Angew. Chem. Int. Ed.* **2009**, *48*, 5195; *Angew. Chem.* **2009**, *121*, 5297.
- B. Shi, J. B. Liu, Z. T. Wang, L. Wang, Y. Lan, L. Q. Lu, W. J. Xiao, *Angew. Chem. Int. Ed.* **2022**, *61*, e202117215; doi.org/10.1002/ange.202117215.
- S. X. Dong, X. H. Liu, X. H. Chen, F. Mei, Y. L. Zhang, B. Gao, L. L. Lin, X. M. Feng, *J. Am. Chem. Soc.* **2010**, *132*, 10650.
- M. W. Miller, C. R. Johnson, *J. Org. Chem.* **1997**, *62*, 1582.
- M. J. Frisch, G. W. Trucks, H. B. Schlegel, G. E. Scuseria, M. A. Robb, J. R. Cheeseman, G. Scalmani, V. Barone, B. Mennucci, G. A. Petersson, H. Nakatsuji, M. Caricato, X. Li, H. P. Hratchian, A. F. Izmaylov, J. Bloino, G. Zheng, J. L. Sonnenberg, M. Hada, M. Ehara, K. Toyota, R. Fukuda, J. Hasegawa, M. Ishida, T. Nakajima, Y. Honda, O. Kitao, H. Nakai, T. Vreven, J. A. Jr. Montgomery, J. E. Peralta, F. Ogliaro, M. Bearpark, J. J. Heyd, E. Brothers, K. N. Kudin, V. N. Staroverov, R. Kobayashi, J. 25 Normand, K. Raghavachari, A. Rendell, J. C. Burant, S. S. Iyengar, J. Tomasi, M. Cossi, N. Rega, M. J. Millam, M. Klene, J. E. Knox, J. B. Cross, V. Bakken, C. Adamo, J. Jaramillo, R. Gomperts, R. E. Stratmann, O. Yazyev, A. J. Austin, R. Cammi, C. Pomelli, J. W. Ochterski, R. L. Martin, K. Morokuma, V. G. Zakrzewski, G. A. Voth, P. Salvador, J. J. Dannenberg, S. Dapprich, A. D. Daniels, Ö. Farkas, J. B. Foresman, J. V. Ortiz, J. Cioslowski, D. J. Fox, Gaussian09, Revision D.01; Gaussian, Inc.: Wallingford, CT, **2013**.
- (a) B. Miehlich, A. Savin, H. Stoll, H. Preuss, *Chem. Phys. Lett.* **1989**, *157*, 200. (b) A. D. A. Becke, *J. Chem. Phys.* **1993**, *98*, 1372.
- S. Grimme, J. Antony, S. Ehrlich, H. Krieg, *J. Chem. Phys.* **2010**, *132*, 154104.
- P. C. Hariharan, J. Pople, *Theor. Chim. Acta.* **1973**, *28*, 213.
- G. Scalmani, M. J. Frisch, *J. Chem. Phys.* **2010**, *132*, 114110.
- C. Y. Legault, CYLview, 1.0b; Université de Sherbrooke, **2009**, (<http://www.cylview.org>).
- T. Lu, F. Chen, *J. Comput. Chem.* **2012**, *33*, 580.
- T. Lu, Q. Chen, *J. Comput. Chem.* **2022**, *43*, 539.
- G. M. Sheldrick, *Acta Cryst.* **2008**, *A64*, 112.
- G. M. Sheldrick, *Acta Cryst.* **2015**, *A71*, 3.
- G. M. Sheldrick, *Acta Cryst.* **2015**, *C71*, 3.
- O. V. Dolomanov, L. J. Bourhis, R. J. Gildea, J. A. K. Howard, H. Puschmann, *J. Appl. Cryst.* **2009**, *42*, 339.
- A. L. Spek, *J. Appl. Cryst.* **2003**, *36*, 7.

## 13. Copies of NMR spectra for products

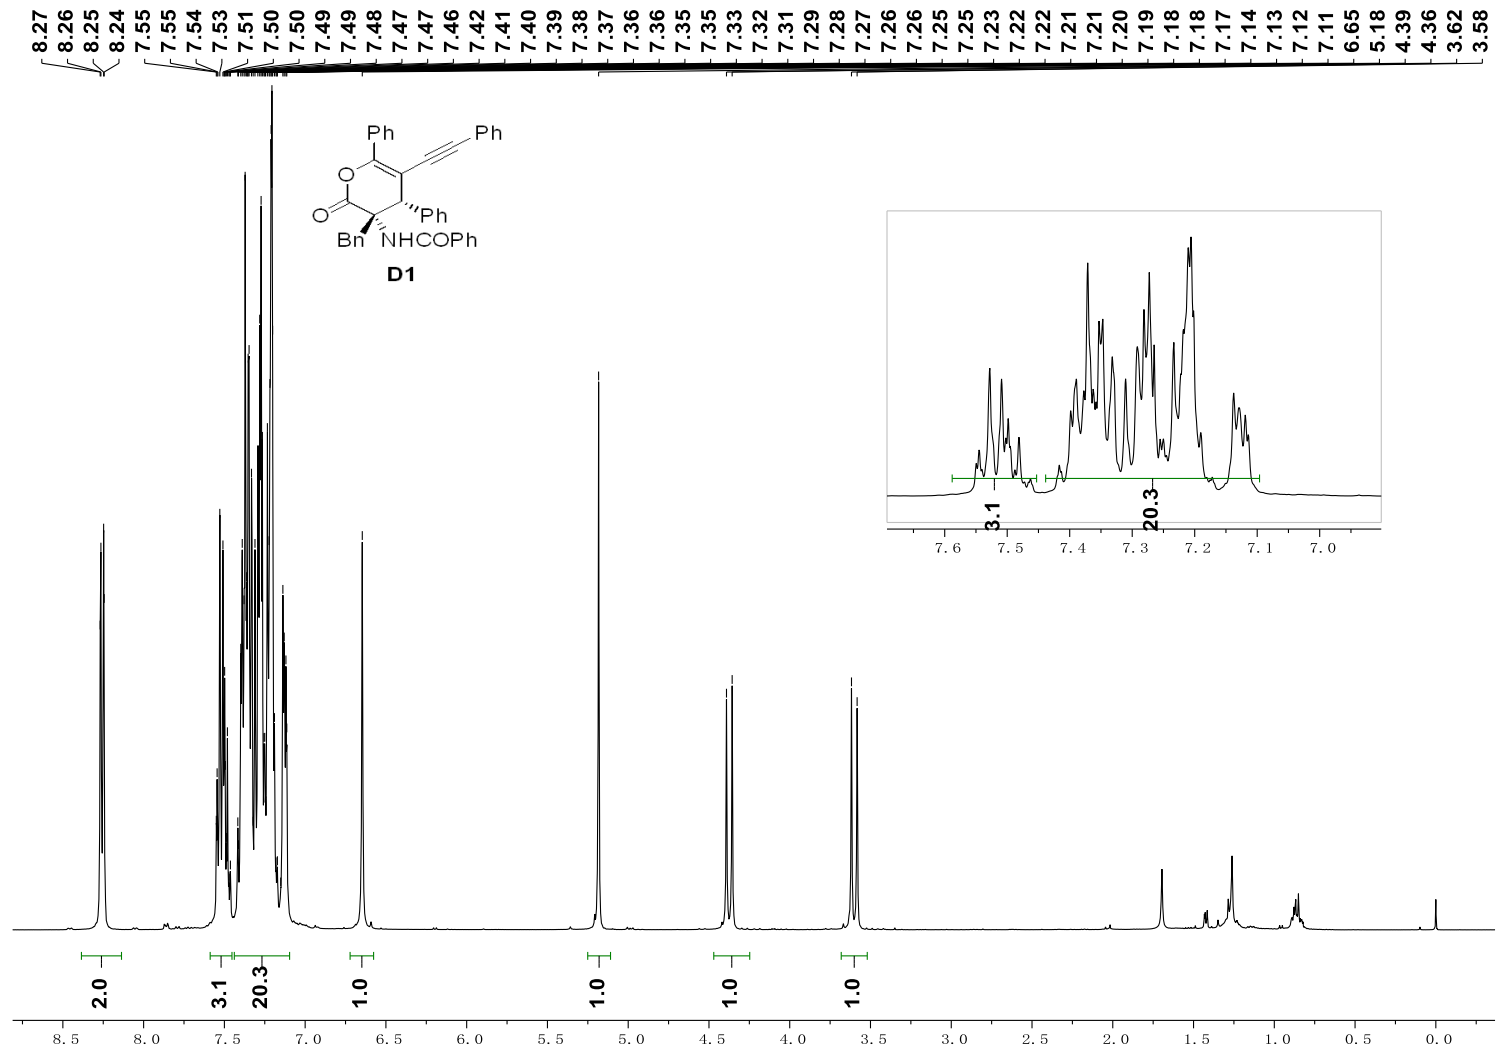



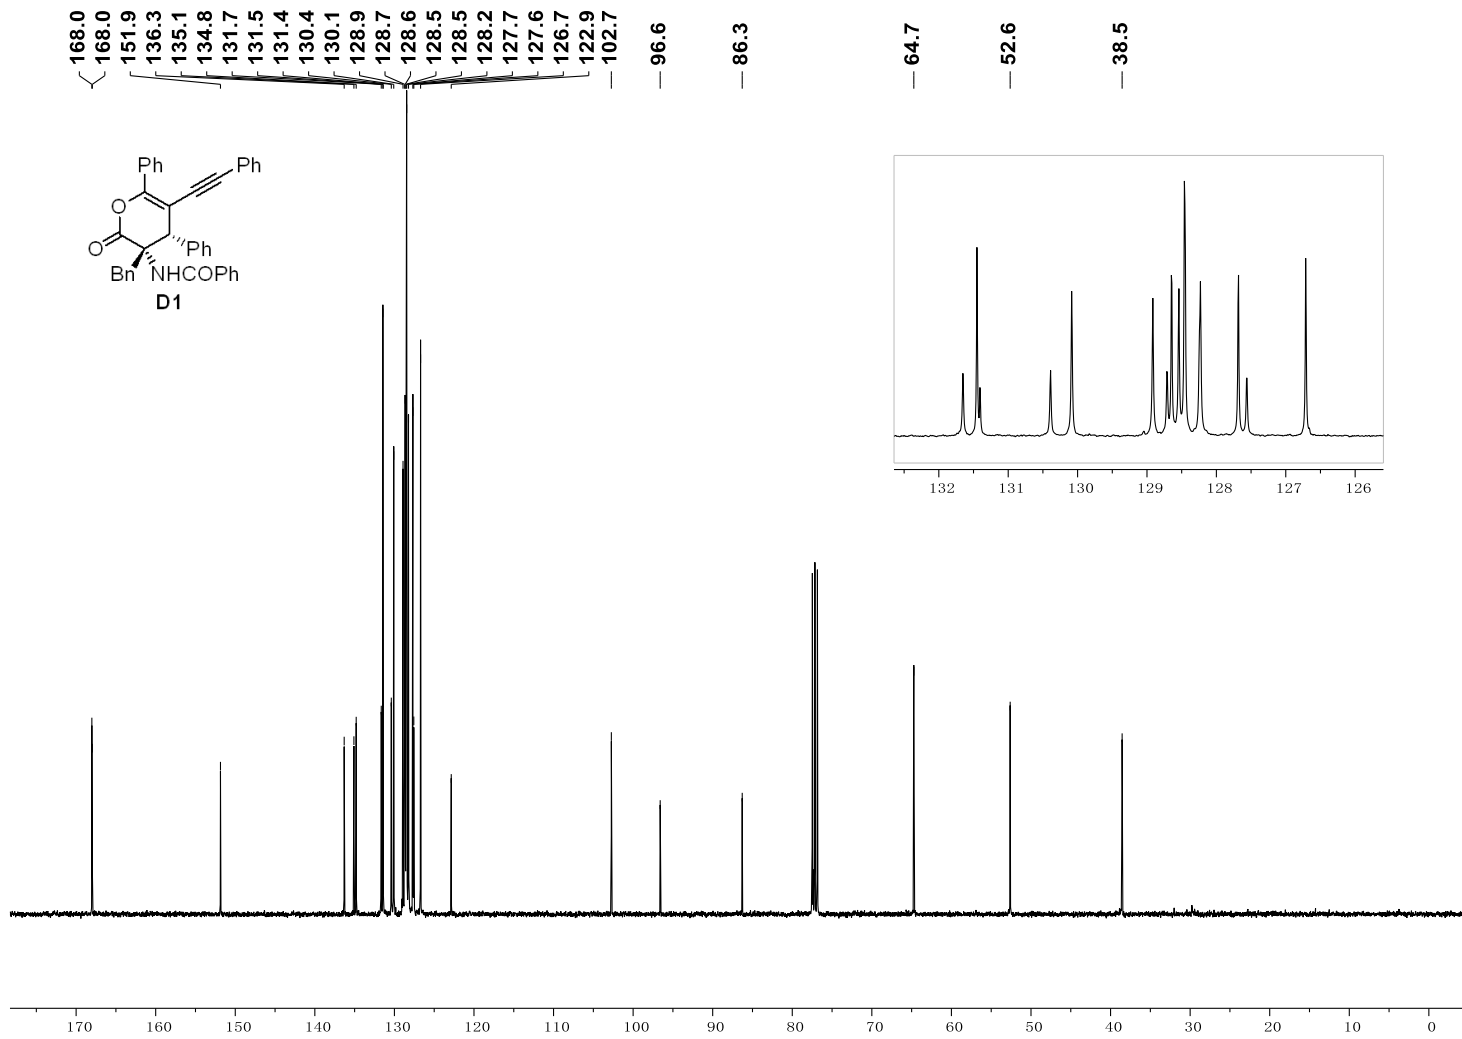

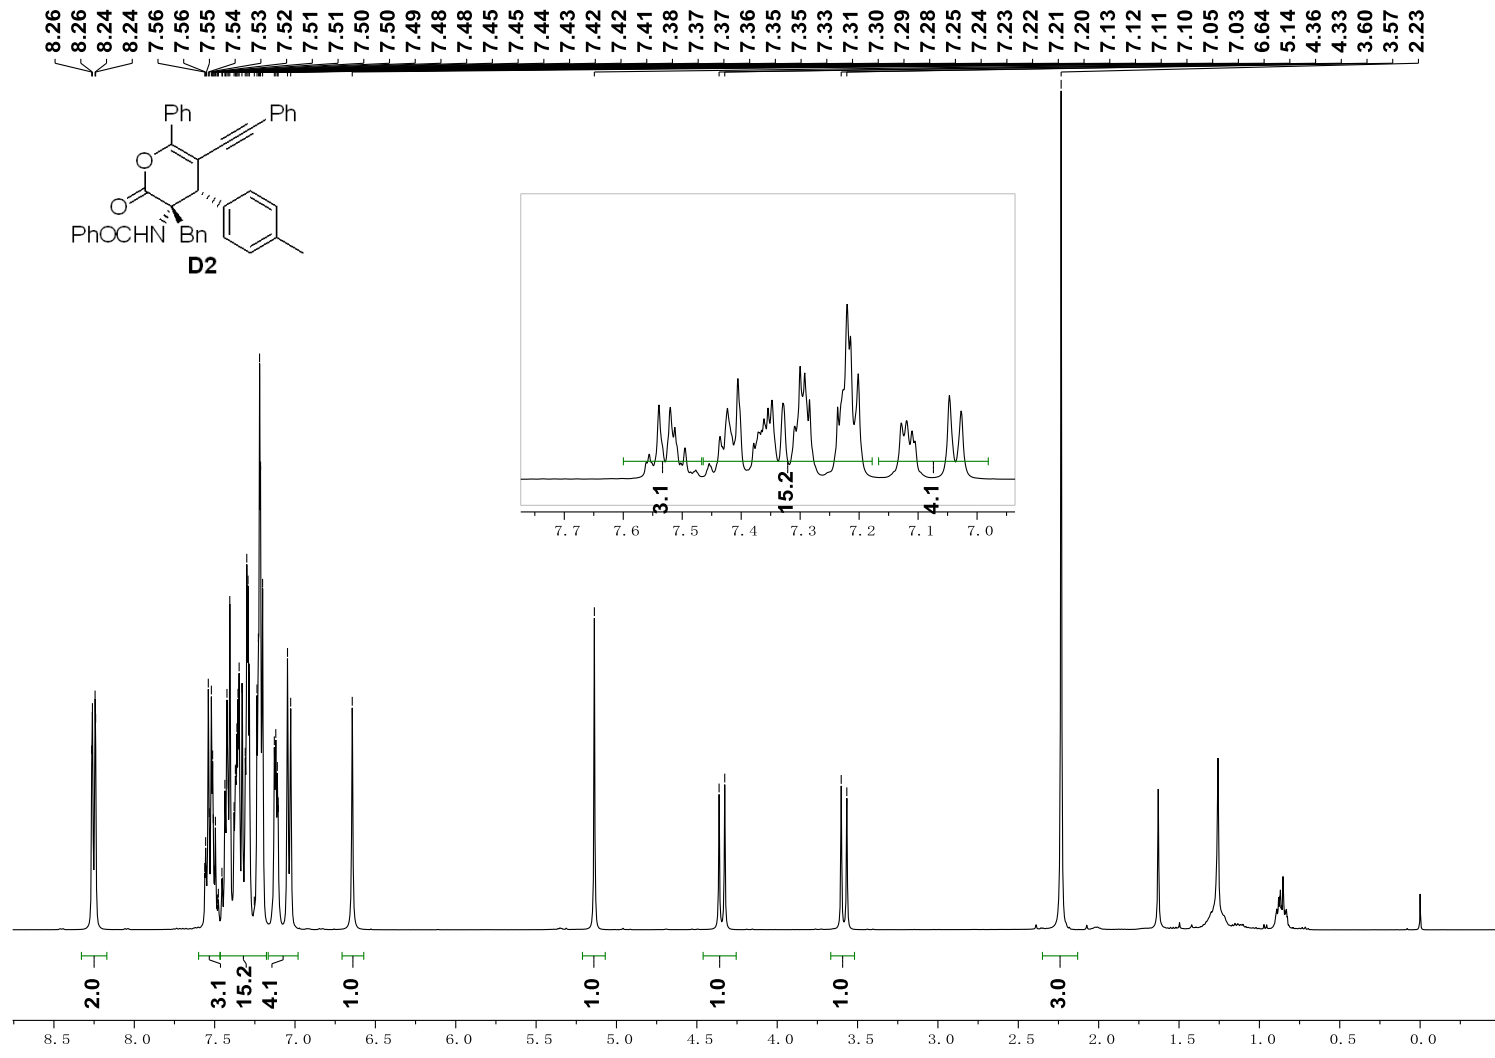

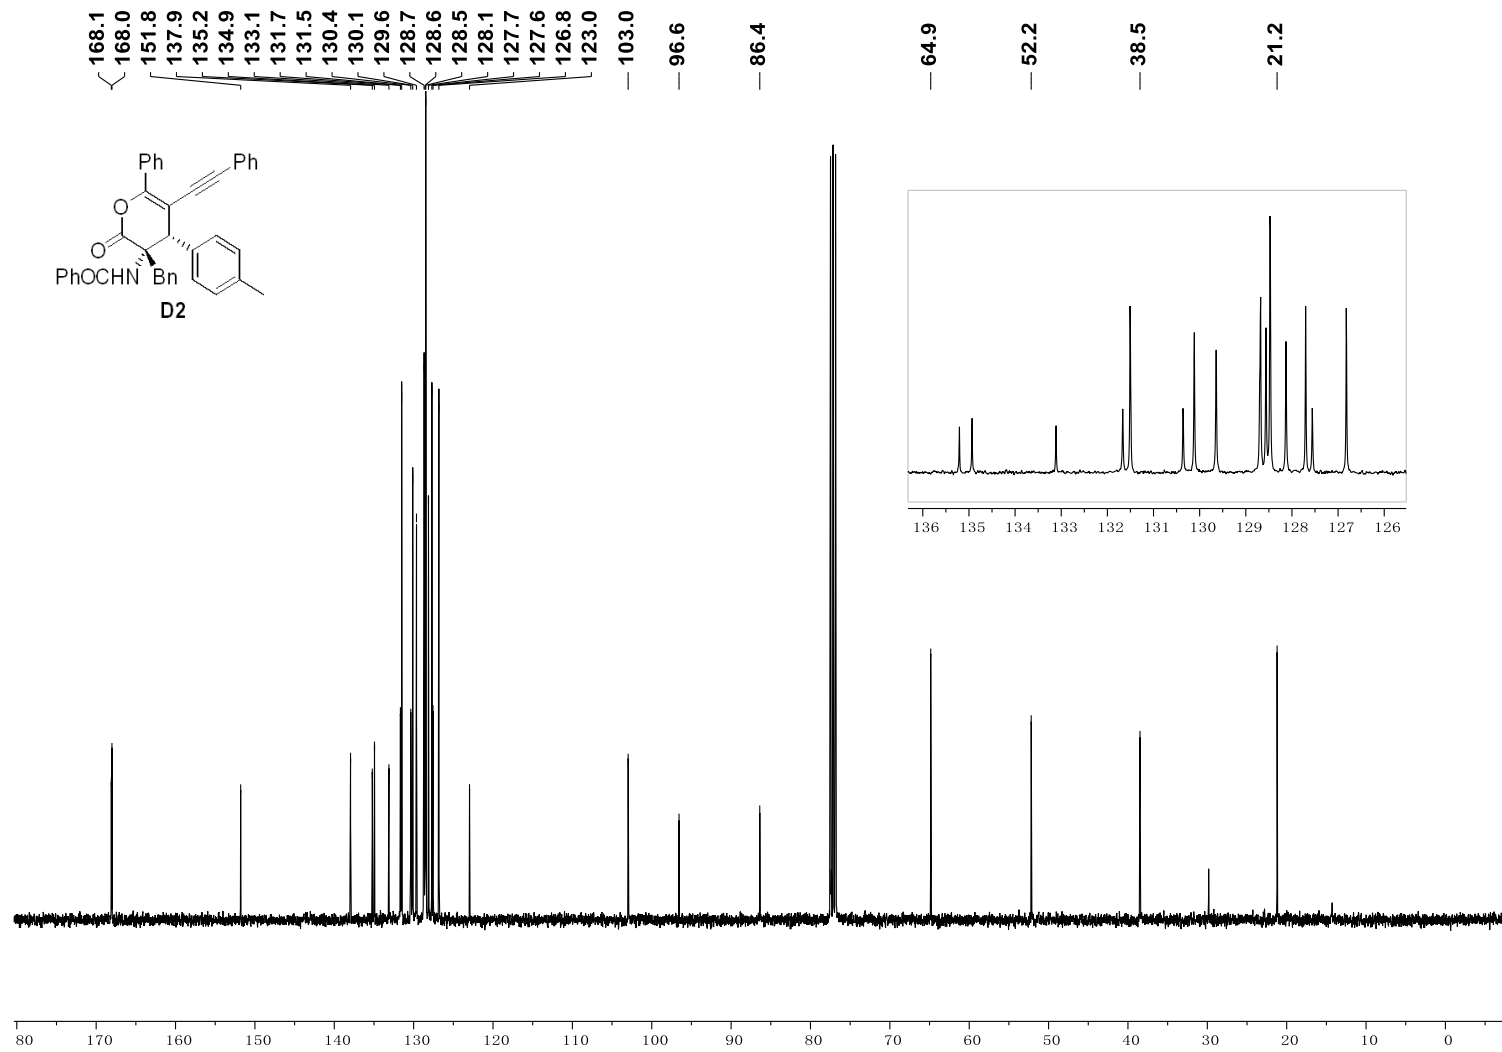

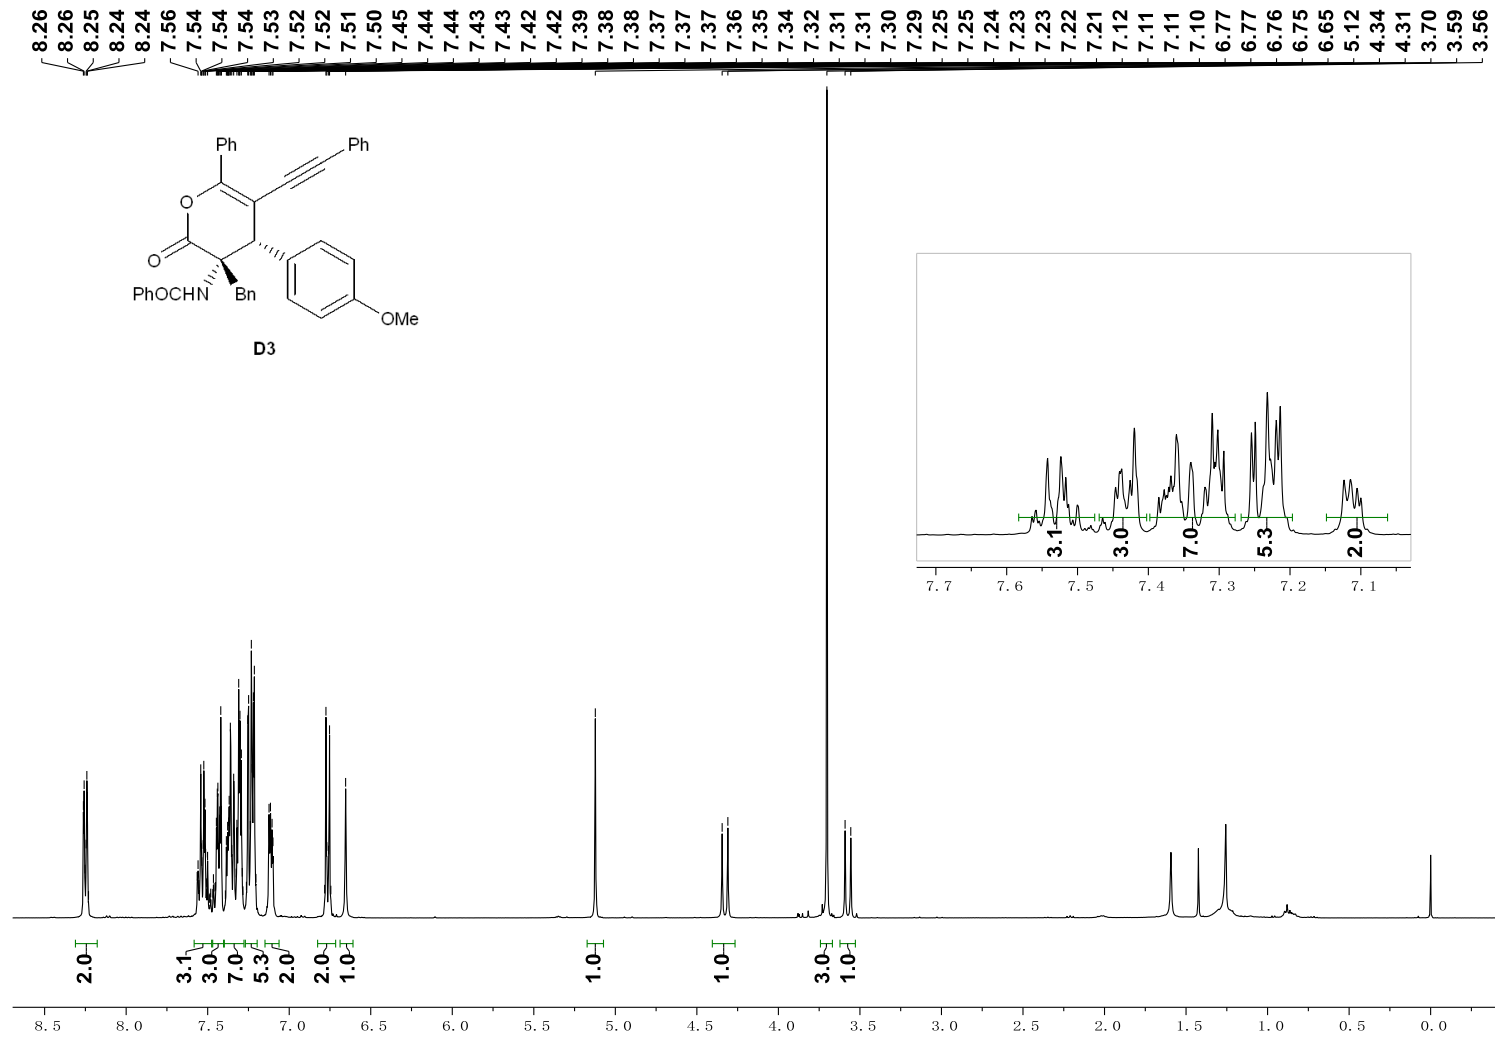

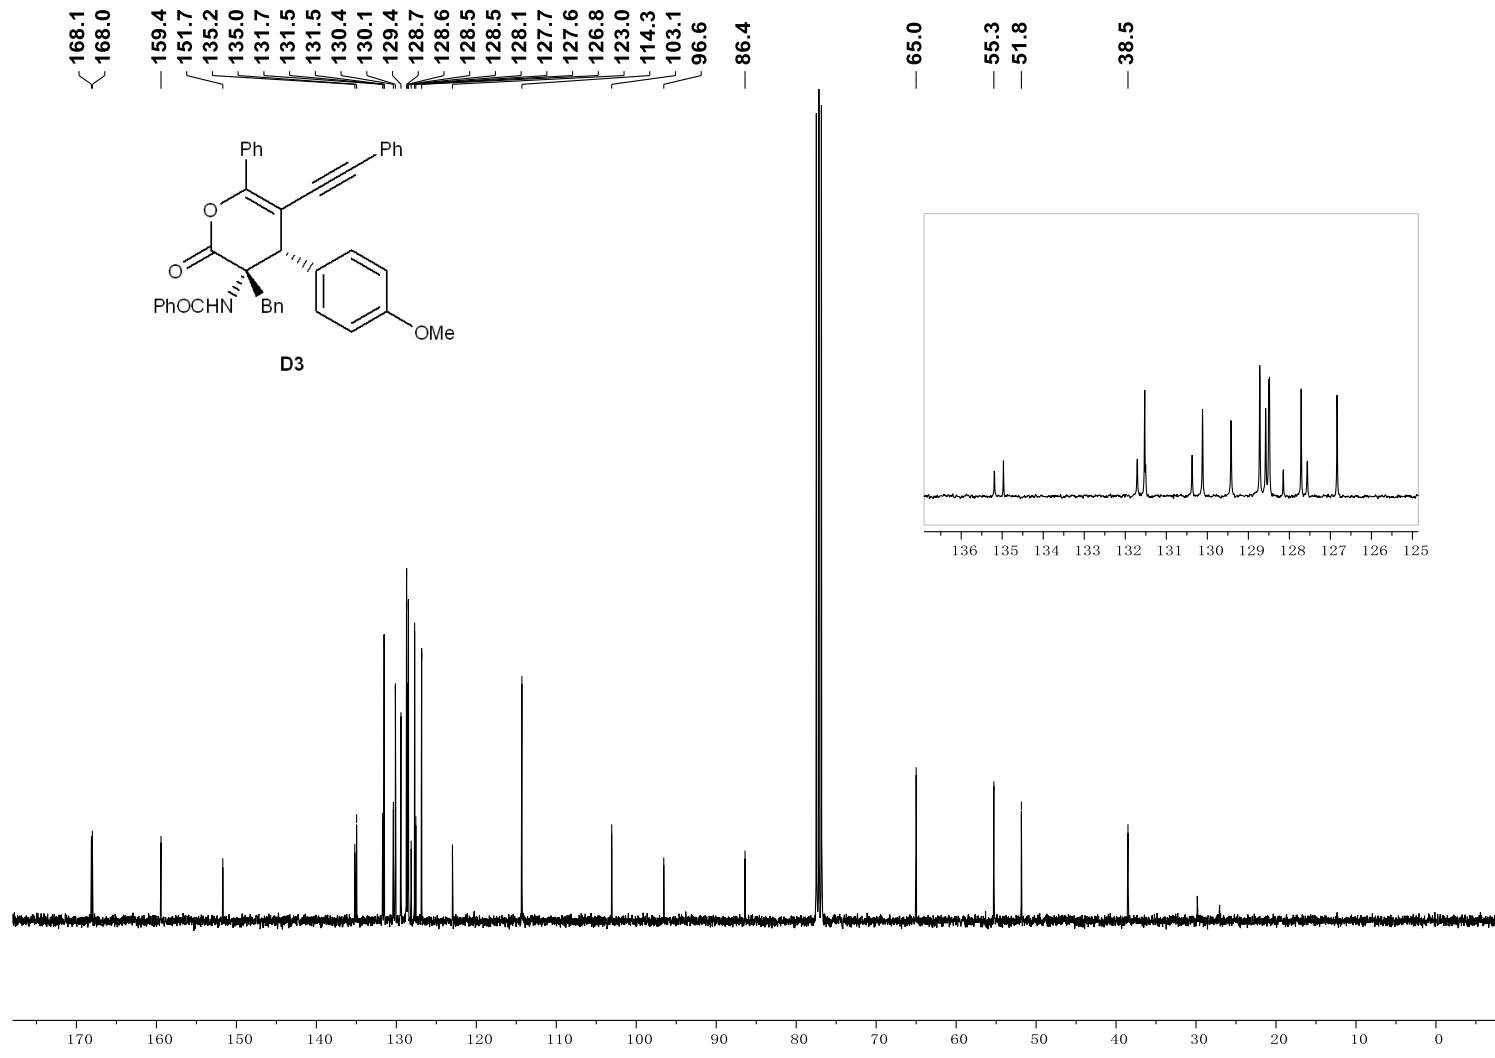



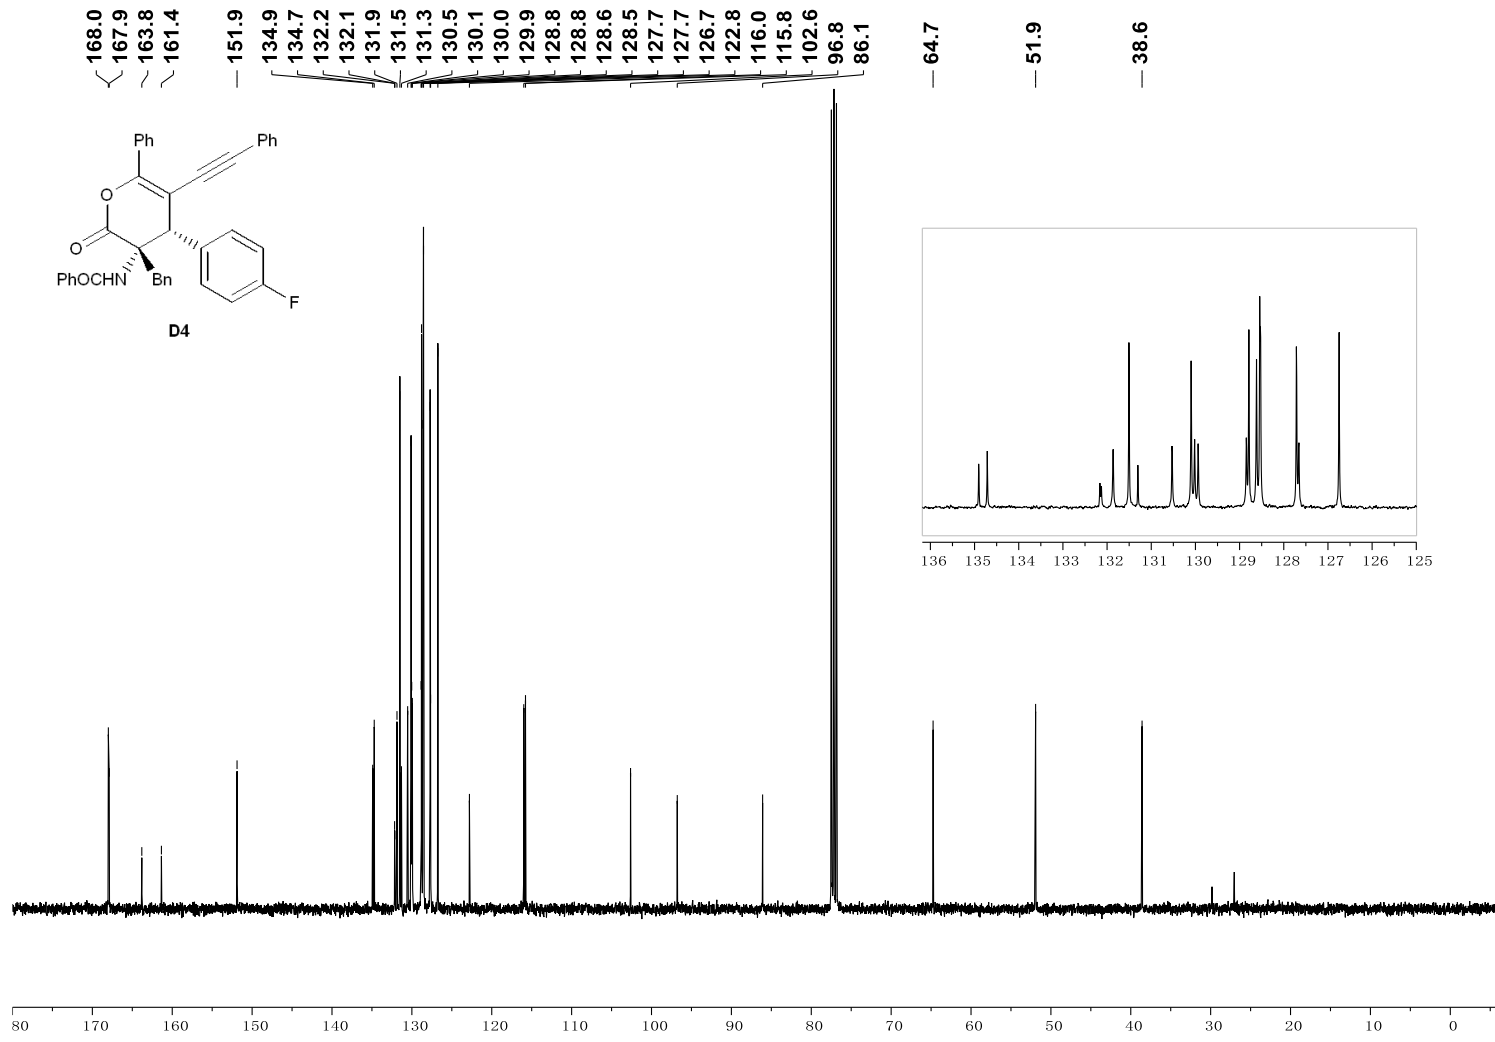

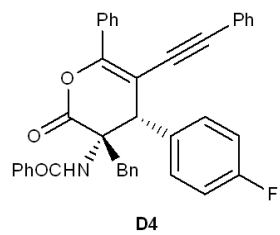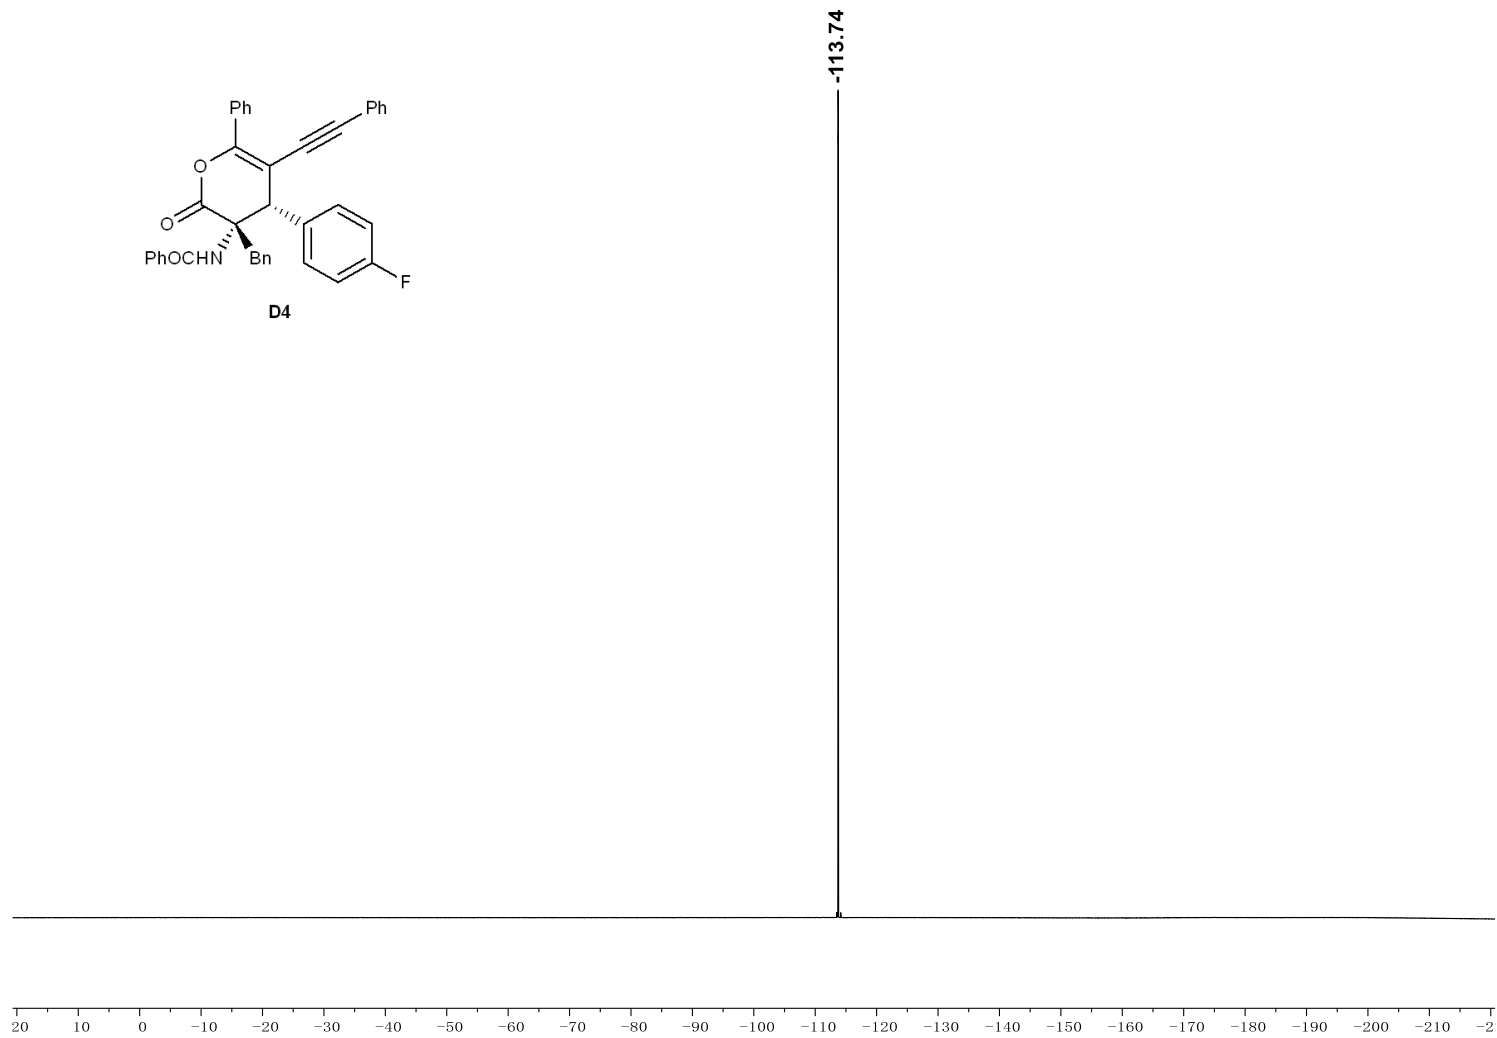



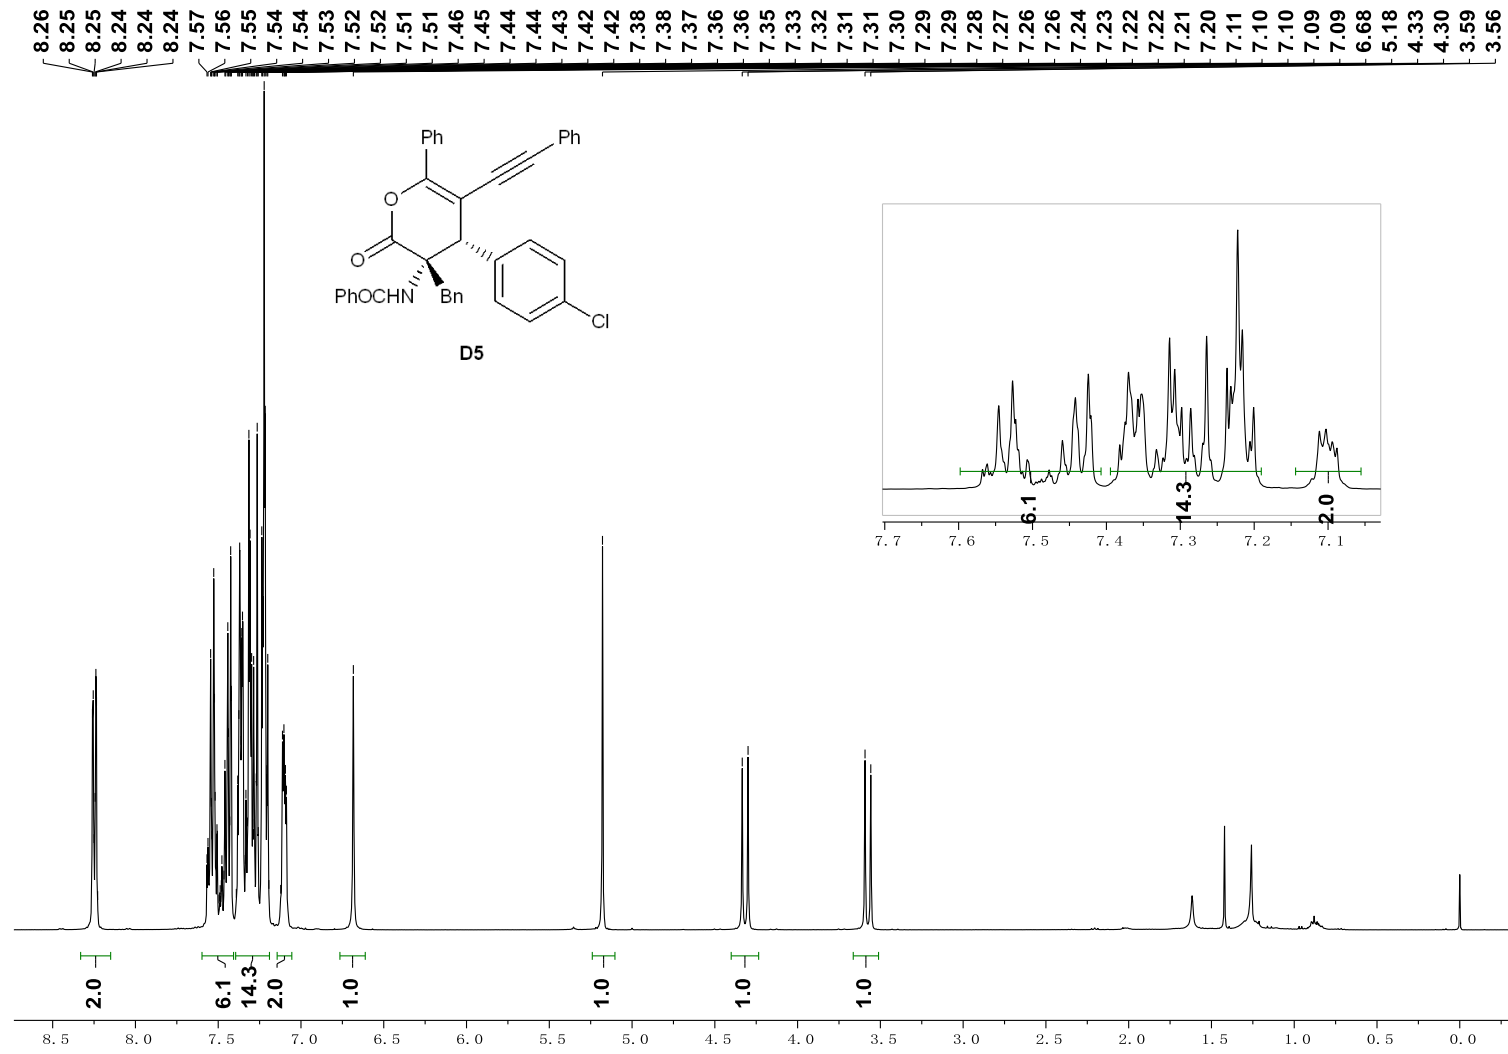

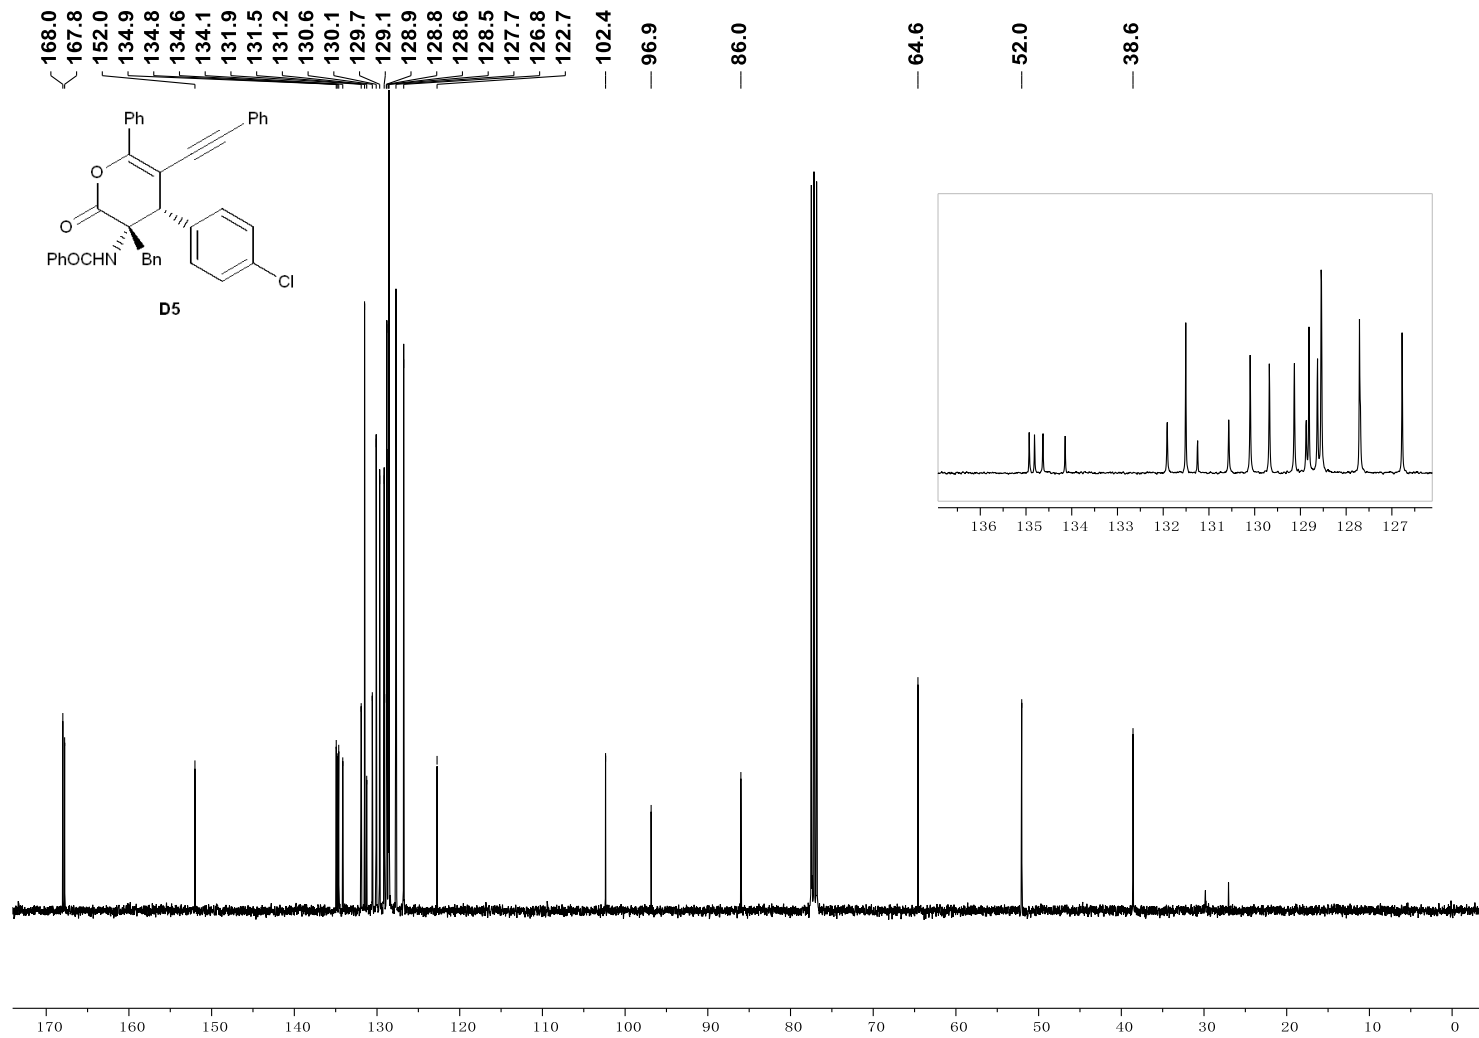

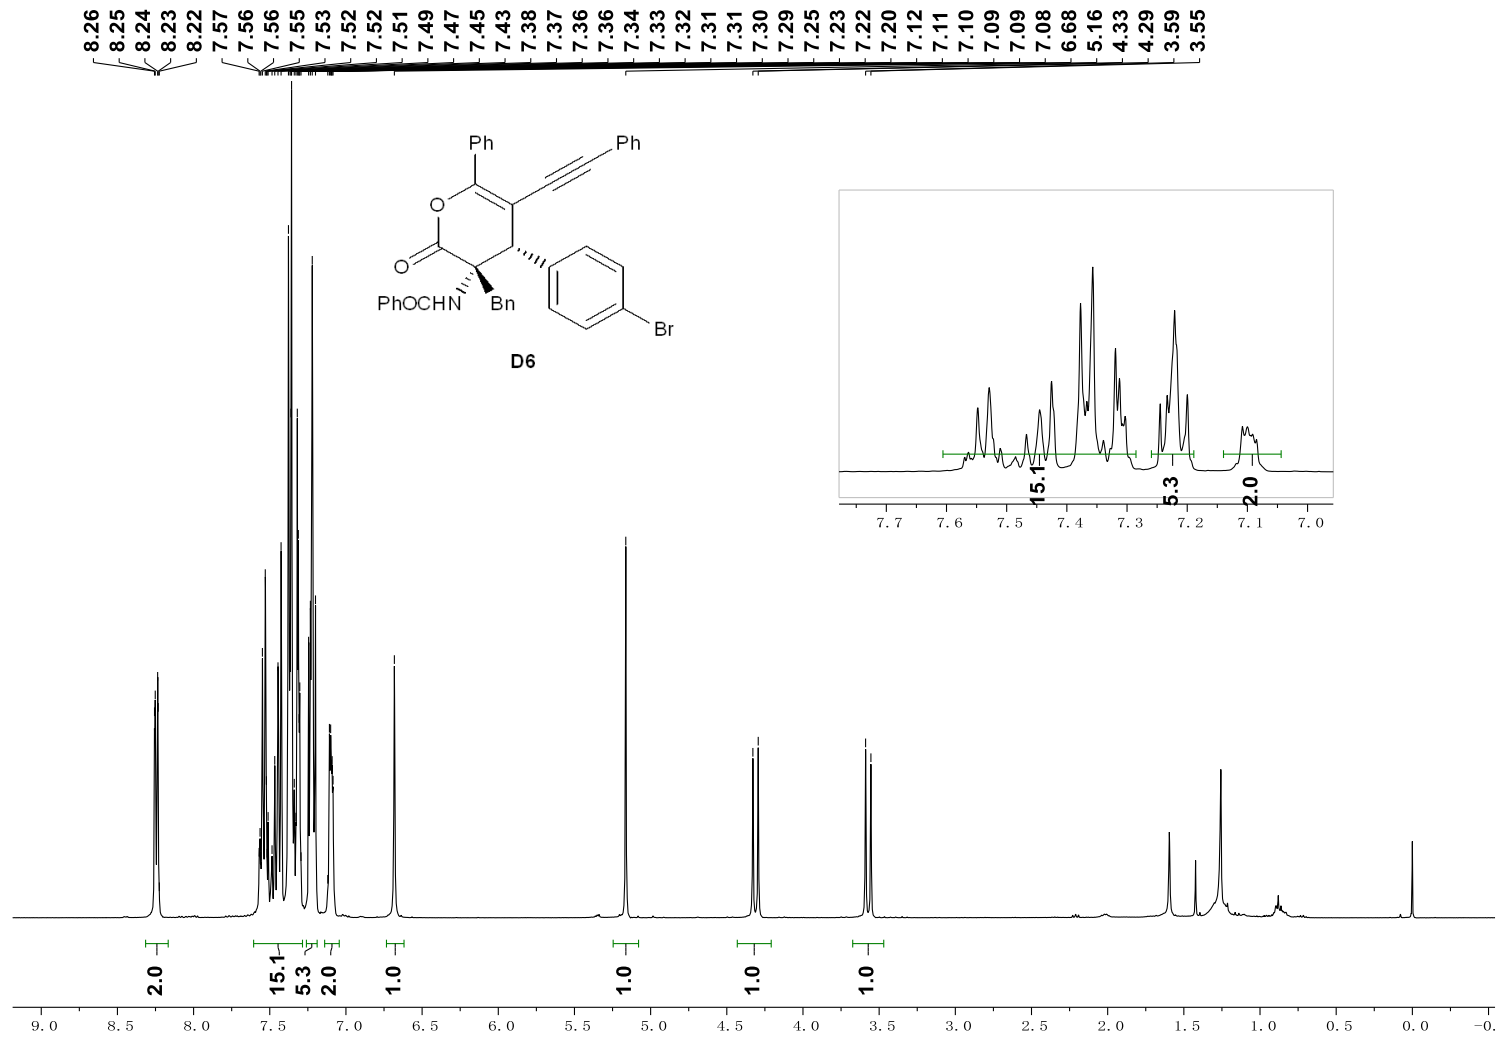

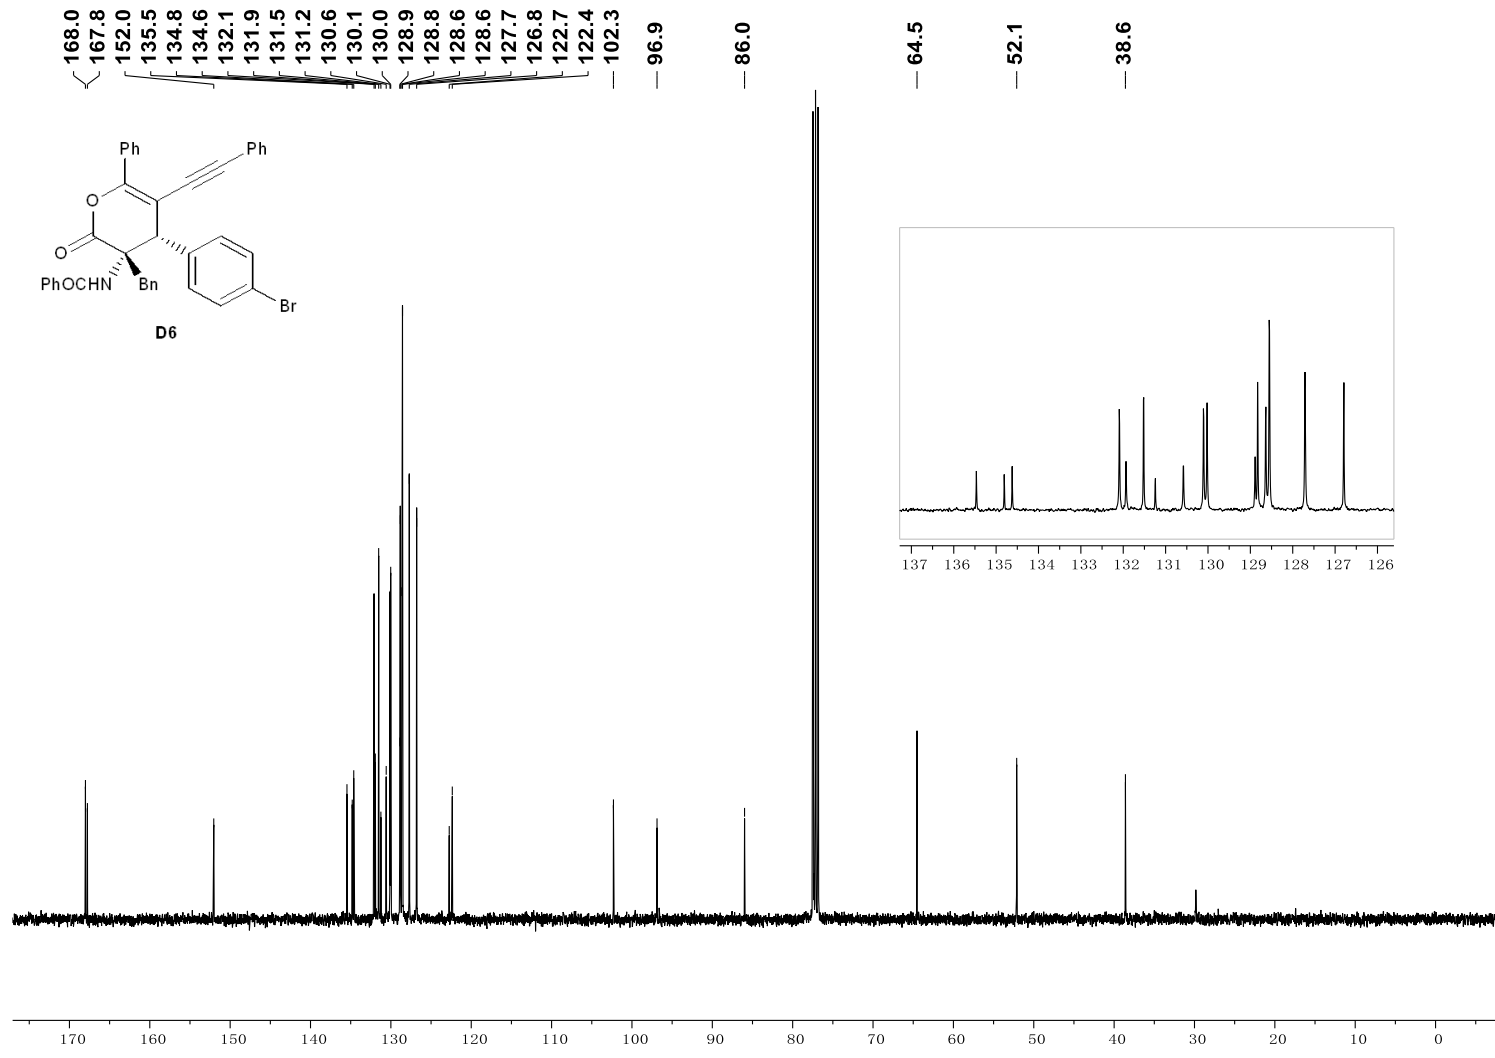

8.28  
8.27  
8.26  
8.25  
7.69  
7.58  
7.58  
7.57  
7.56  
7.56  
7.54  
7.54  
7.53  
7.52  
7.52  
7.51  
7.48  
7.47  
7.46  
7.45  
7.43  
7.41  
7.39  
7.38  
7.38  
7.37  
7.36  
7.34  
7.34  
7.33  
7.32  
7.31  
7.30  
7.25  
7.24  
7.23  
7.23  
7.13  
7.12  
7.11  
7.10  
6.65  
5.29  
4.36  
4.32  
3.62  
3.59

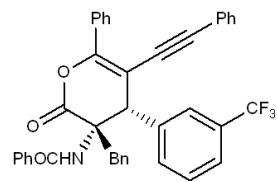

D7

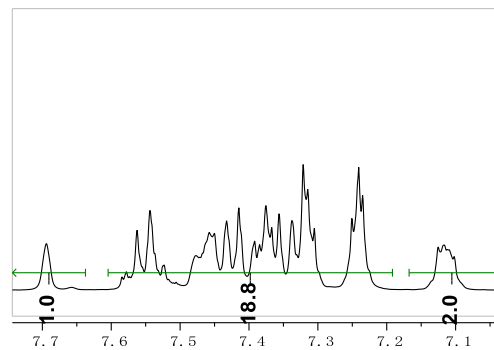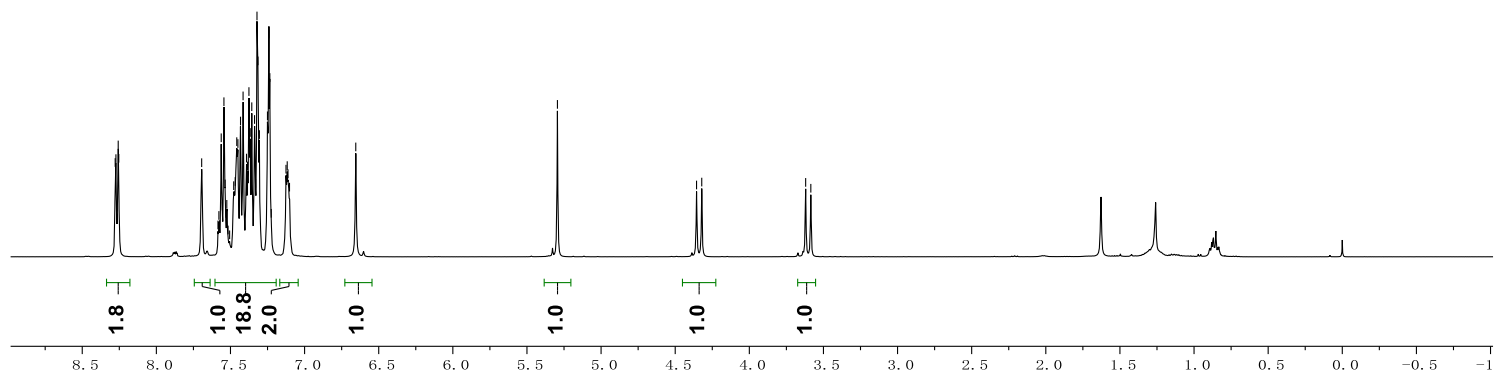

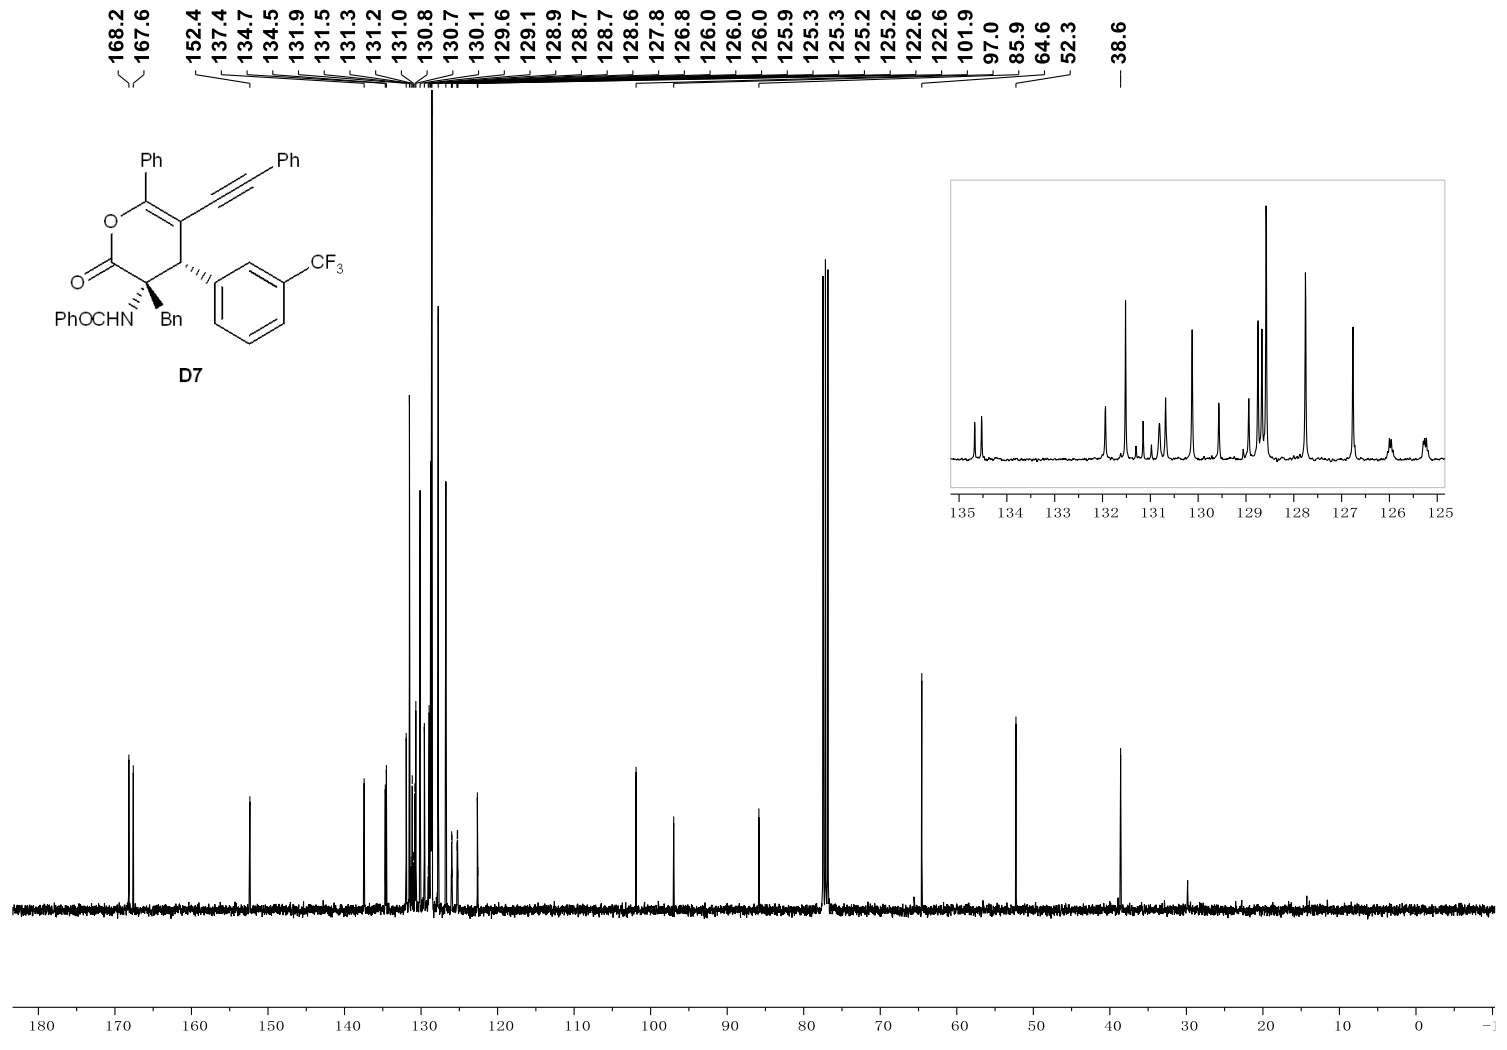

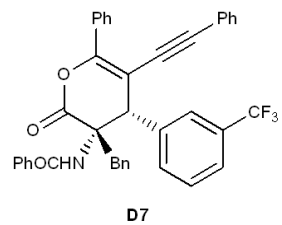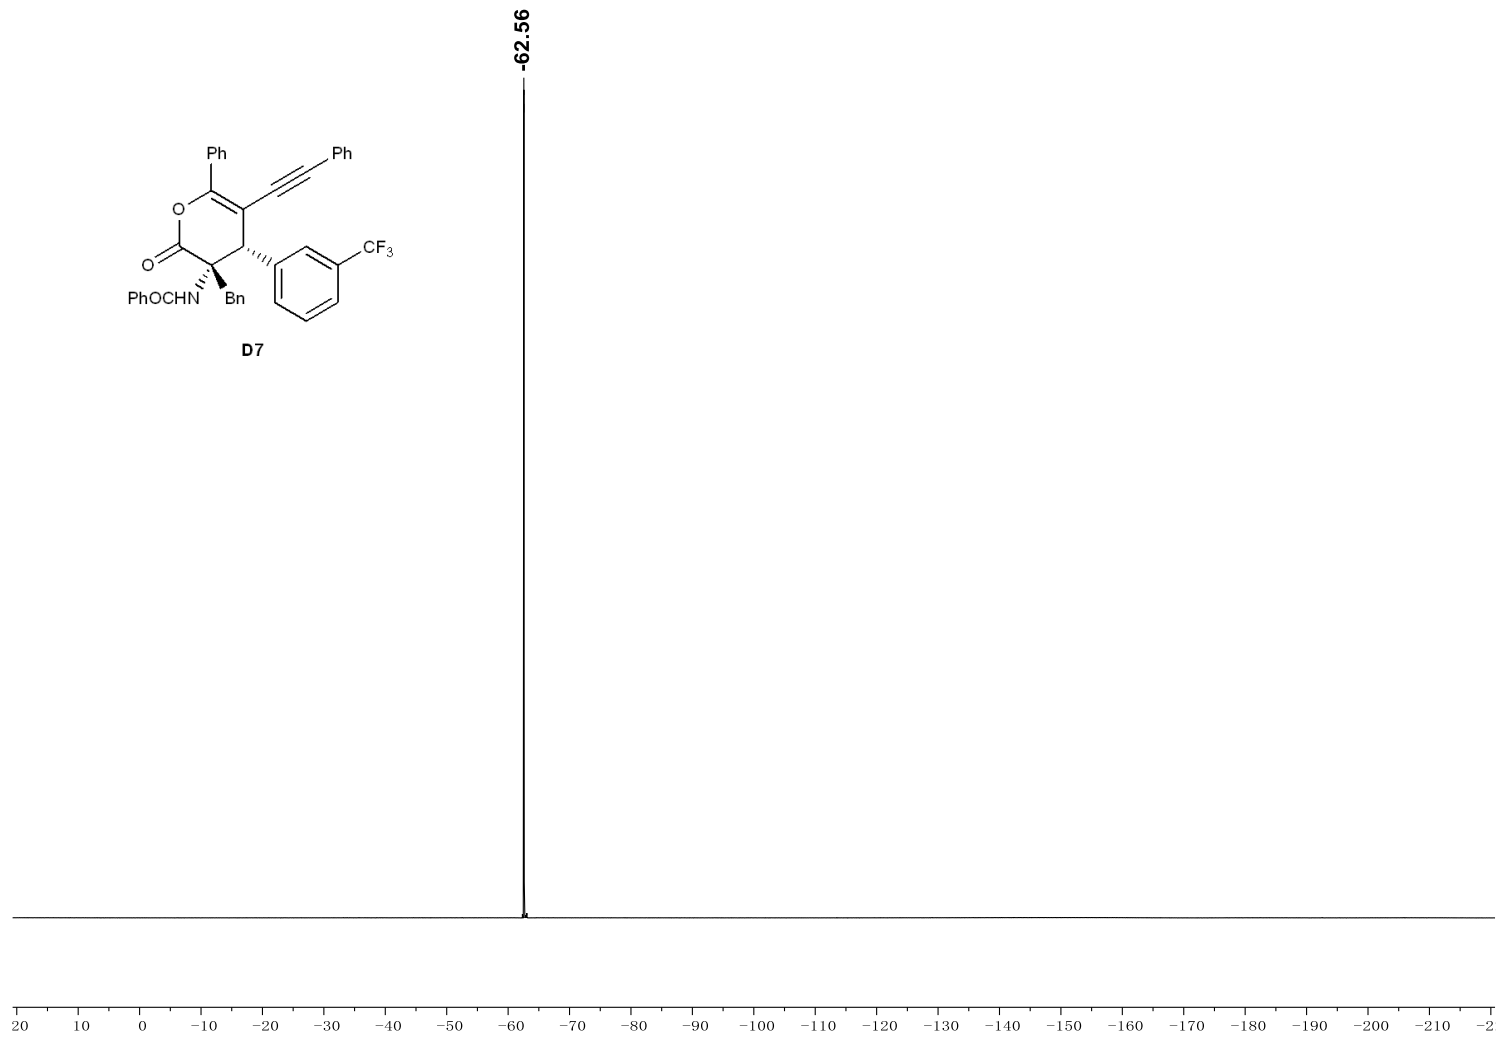

8.27  
8.27  
8.25  
8.25  
7.58  
7.57  
7.57  
7.56  
7.55  
7.54  
7.53  
7.52  
7.52  
7.51  
7.50  
7.50  
7.48  
7.47  
7.46  
7.45  
7.44  
7.43  
7.40  
7.39  
7.39  
7.38  
7.37  
7.35  
7.33  
7.32  
7.32  
7.31  
7.30  
7.25  
7.24  
7.23  
7.22  
7.21  
7.21  
7.20  
7.19  
7.18  
7.18  
7.17  
7.15  
7.13  
7.12  
7.11  
7.10  
7.10  
6.65  
5.17  
4.35  
4.31  
3.59  
3.55

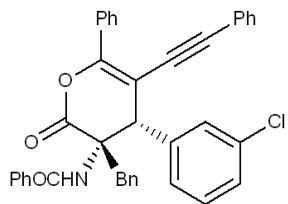

D8

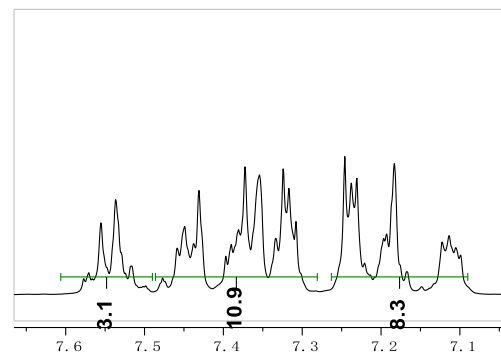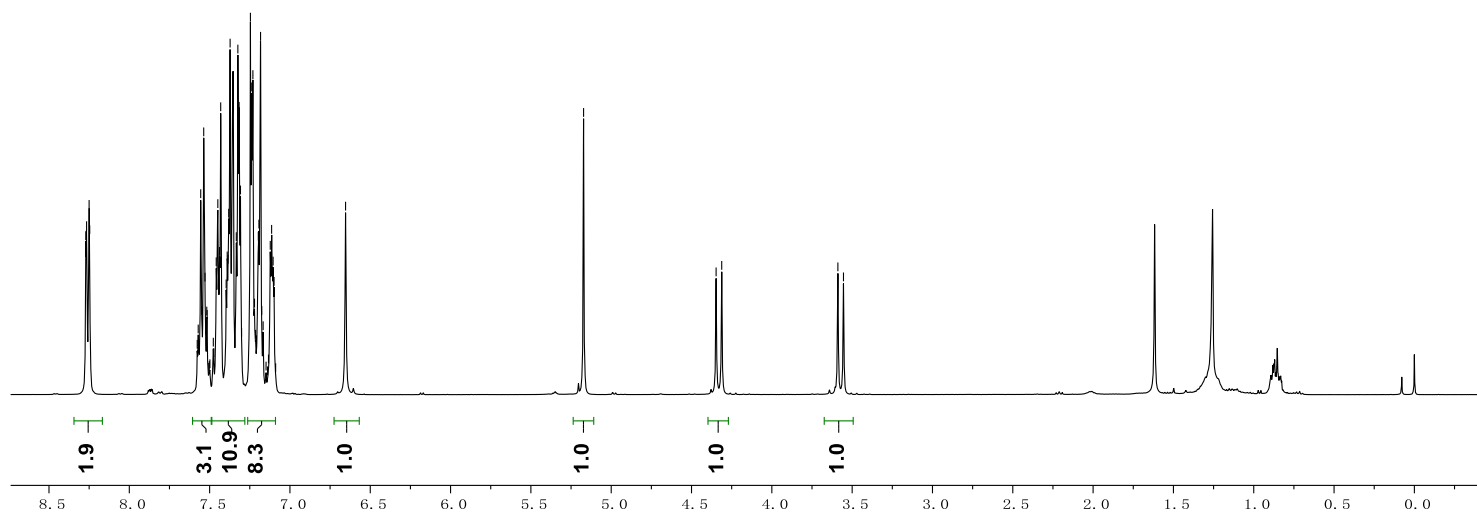



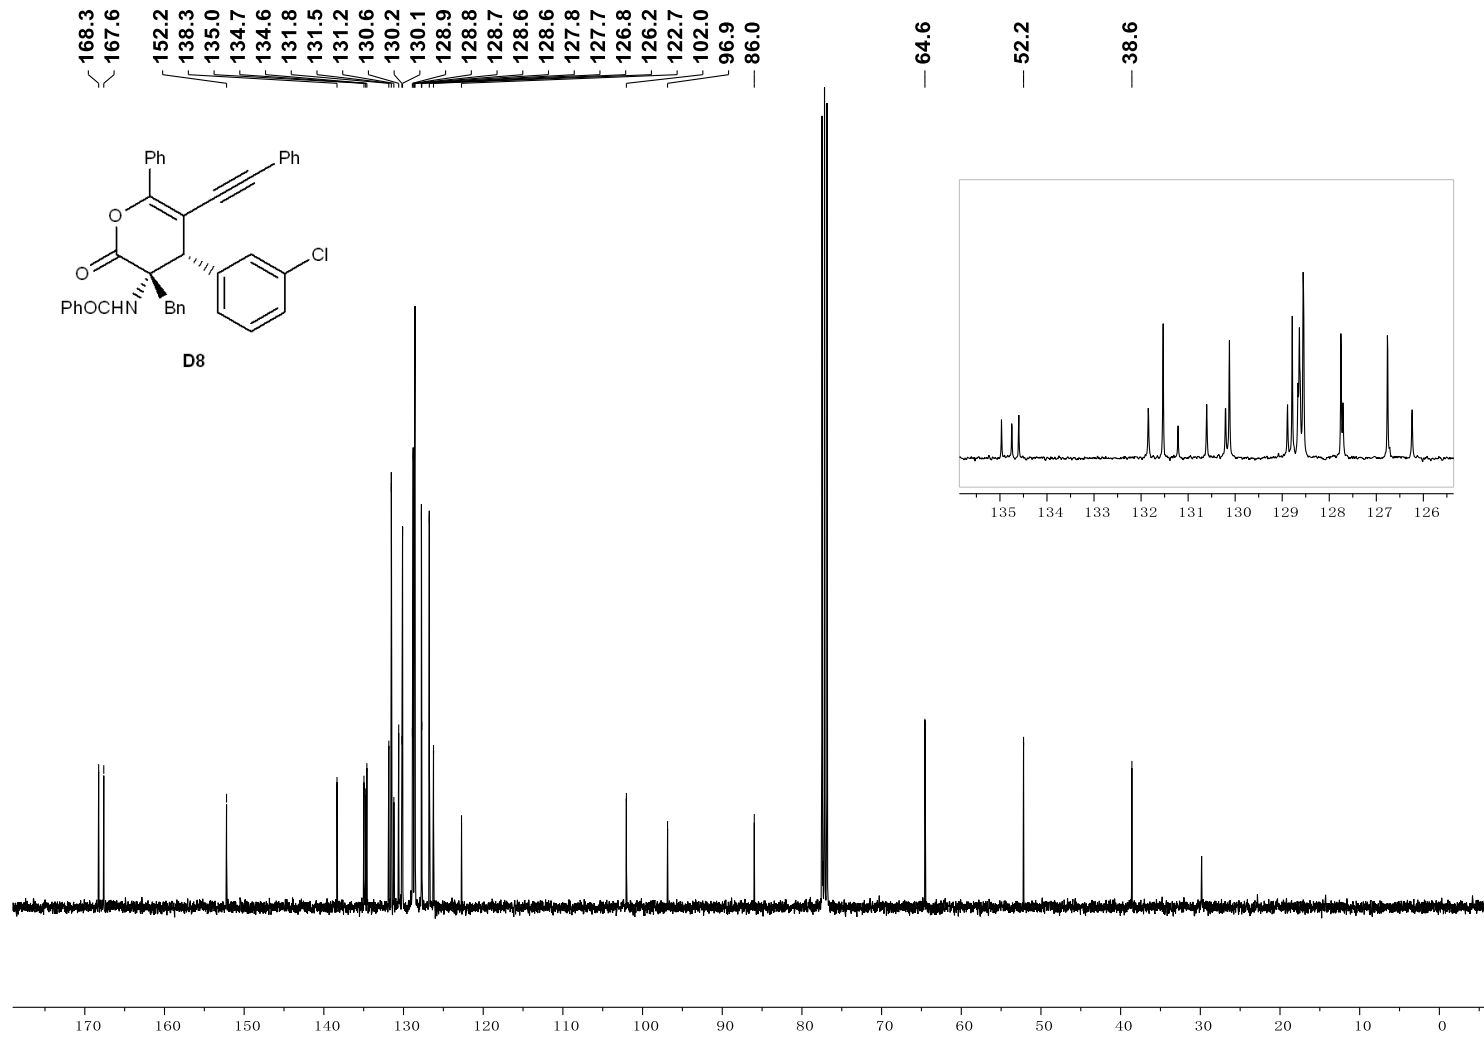

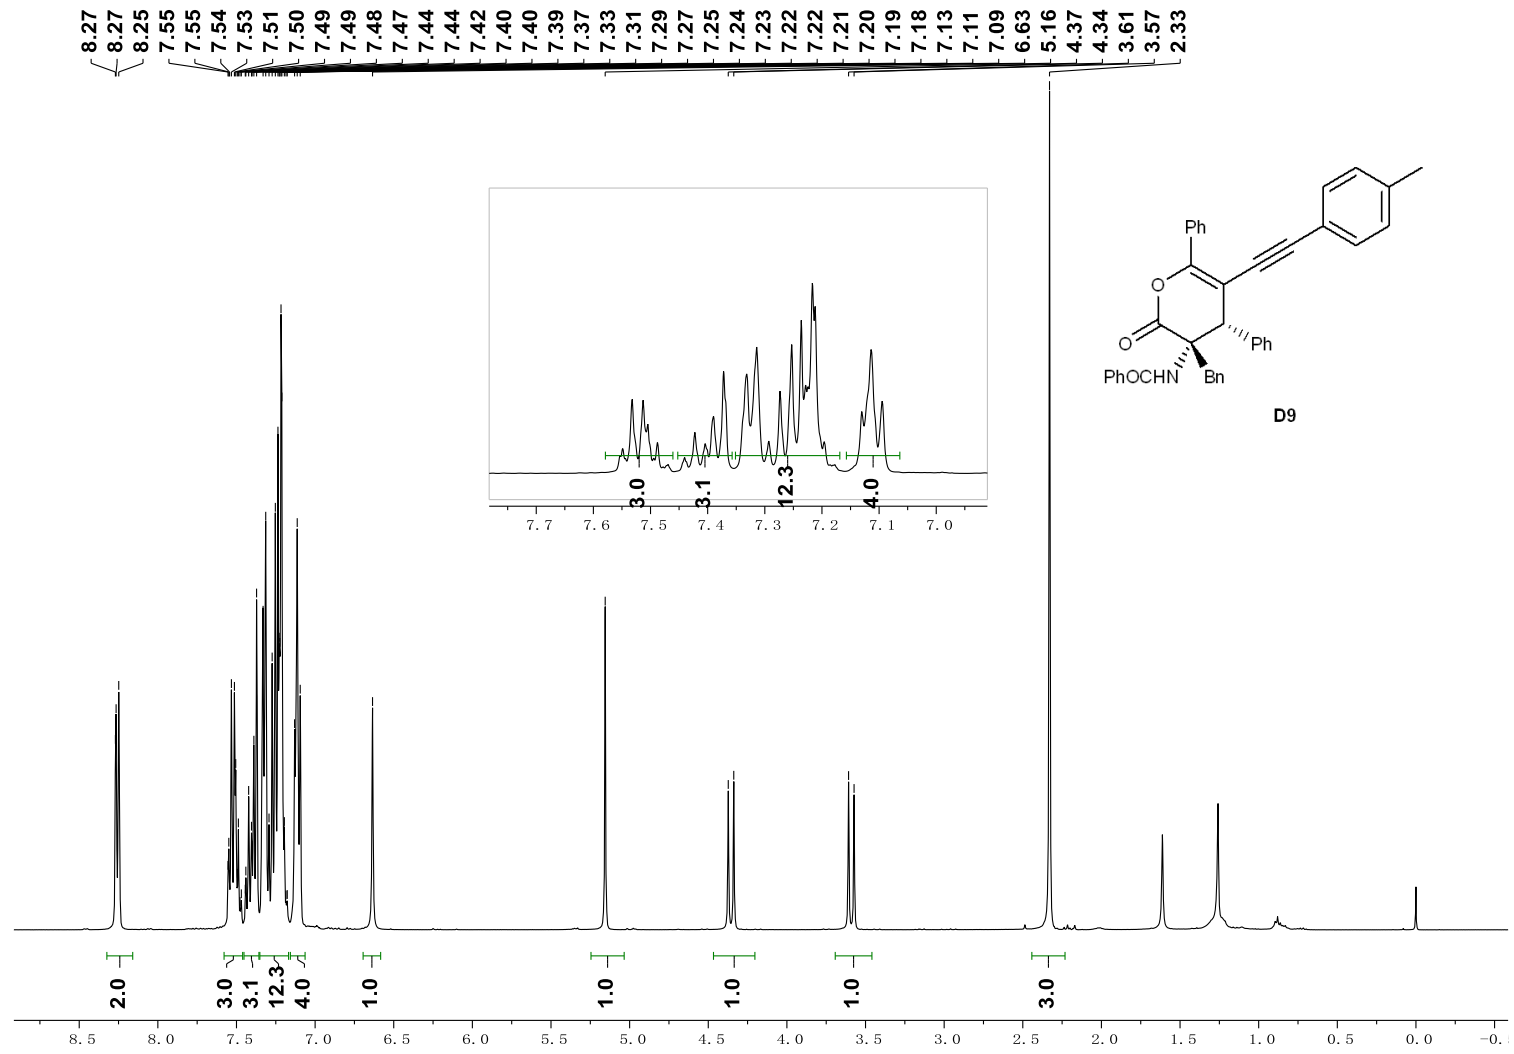

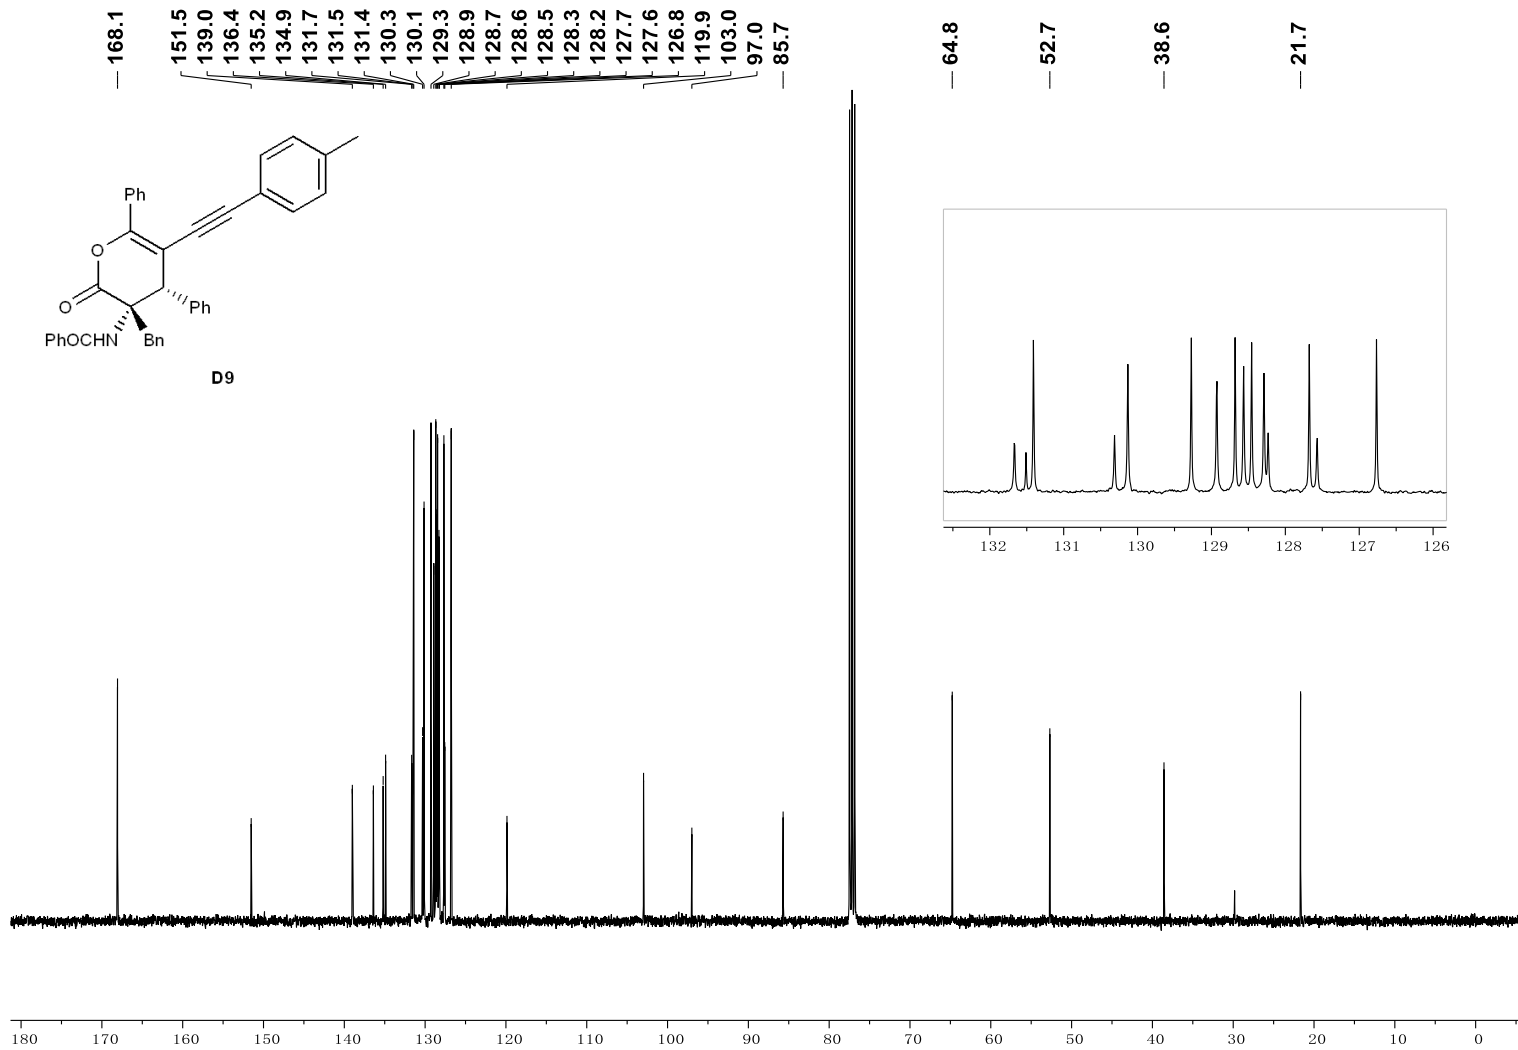

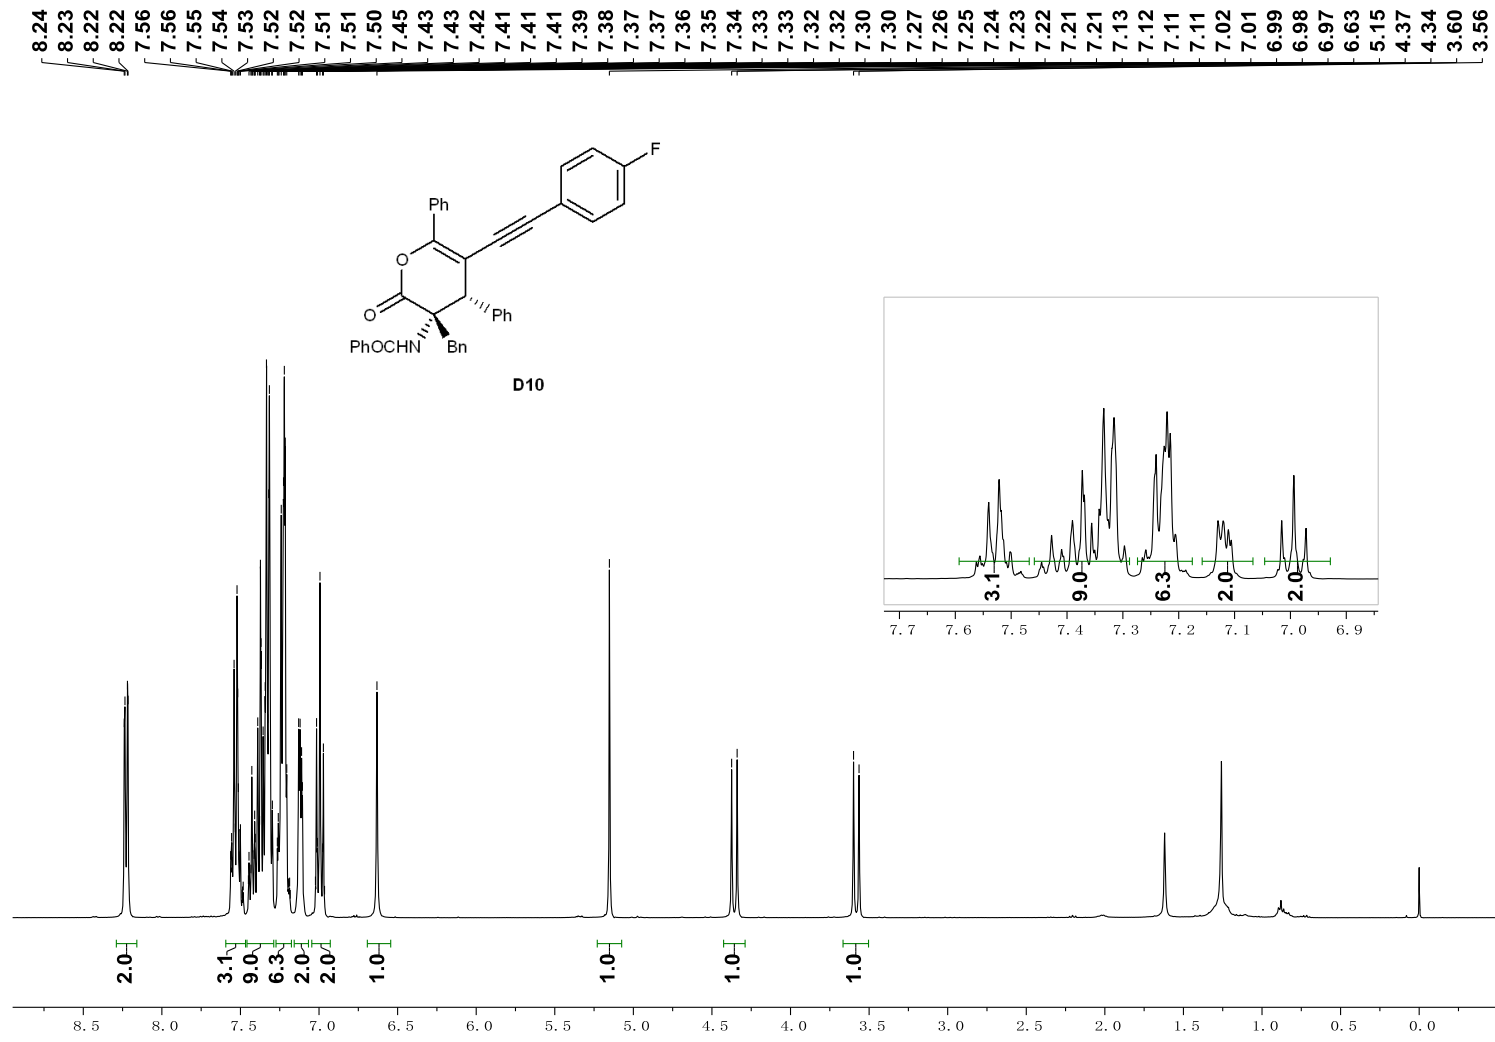

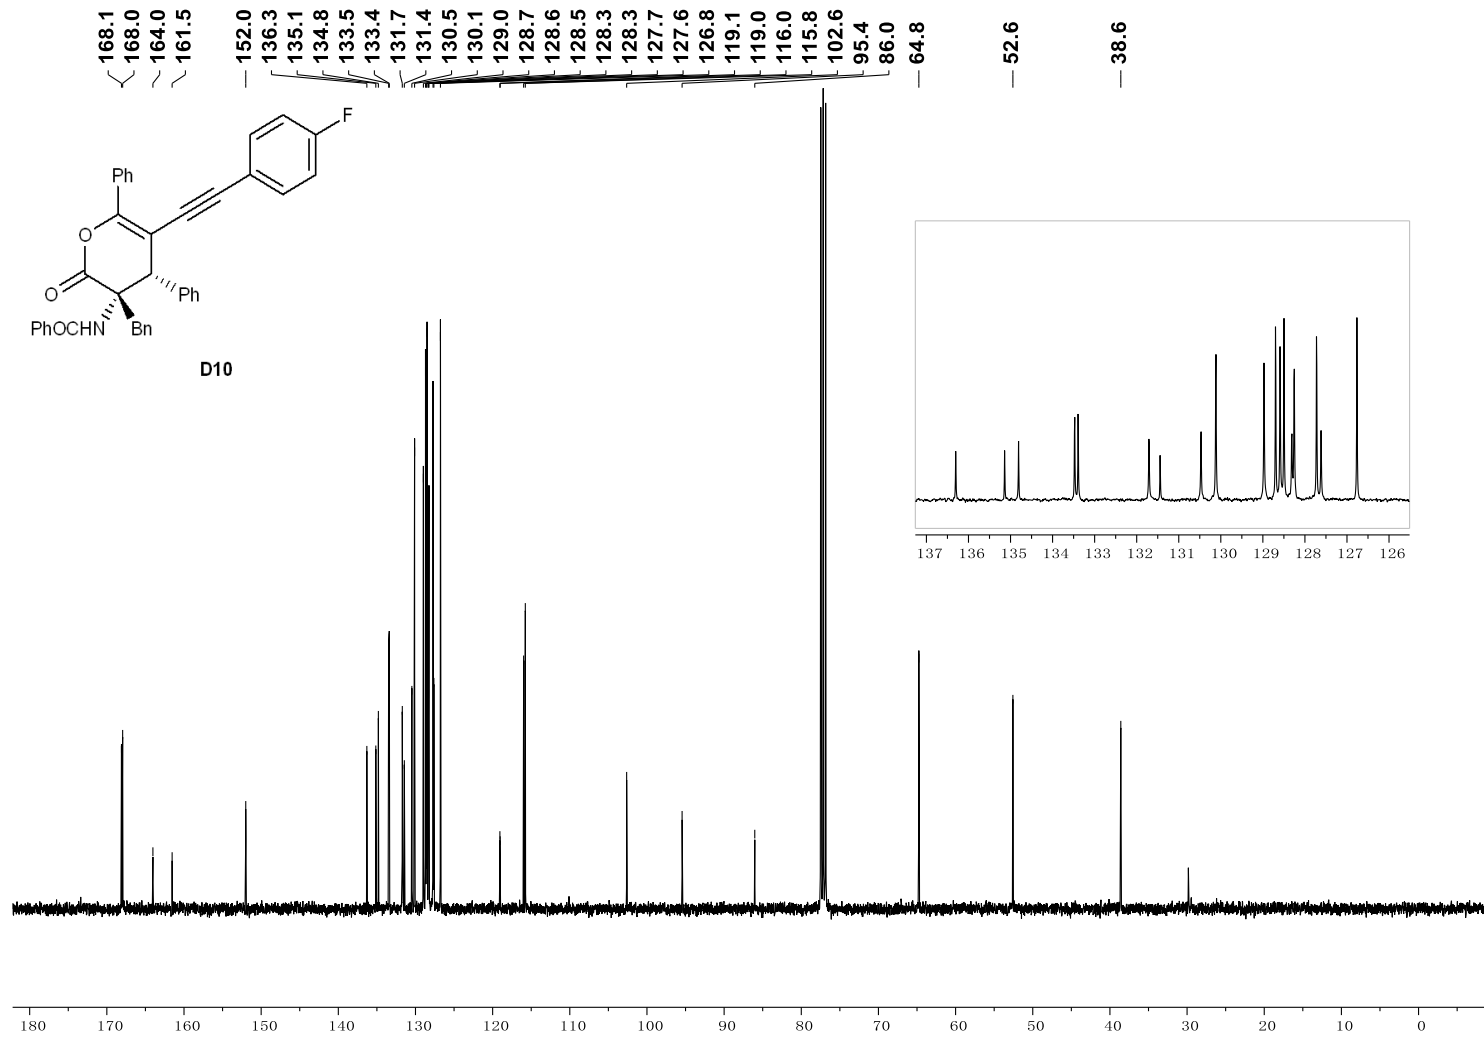

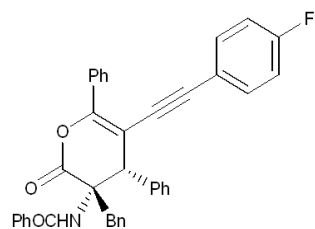

**D10**

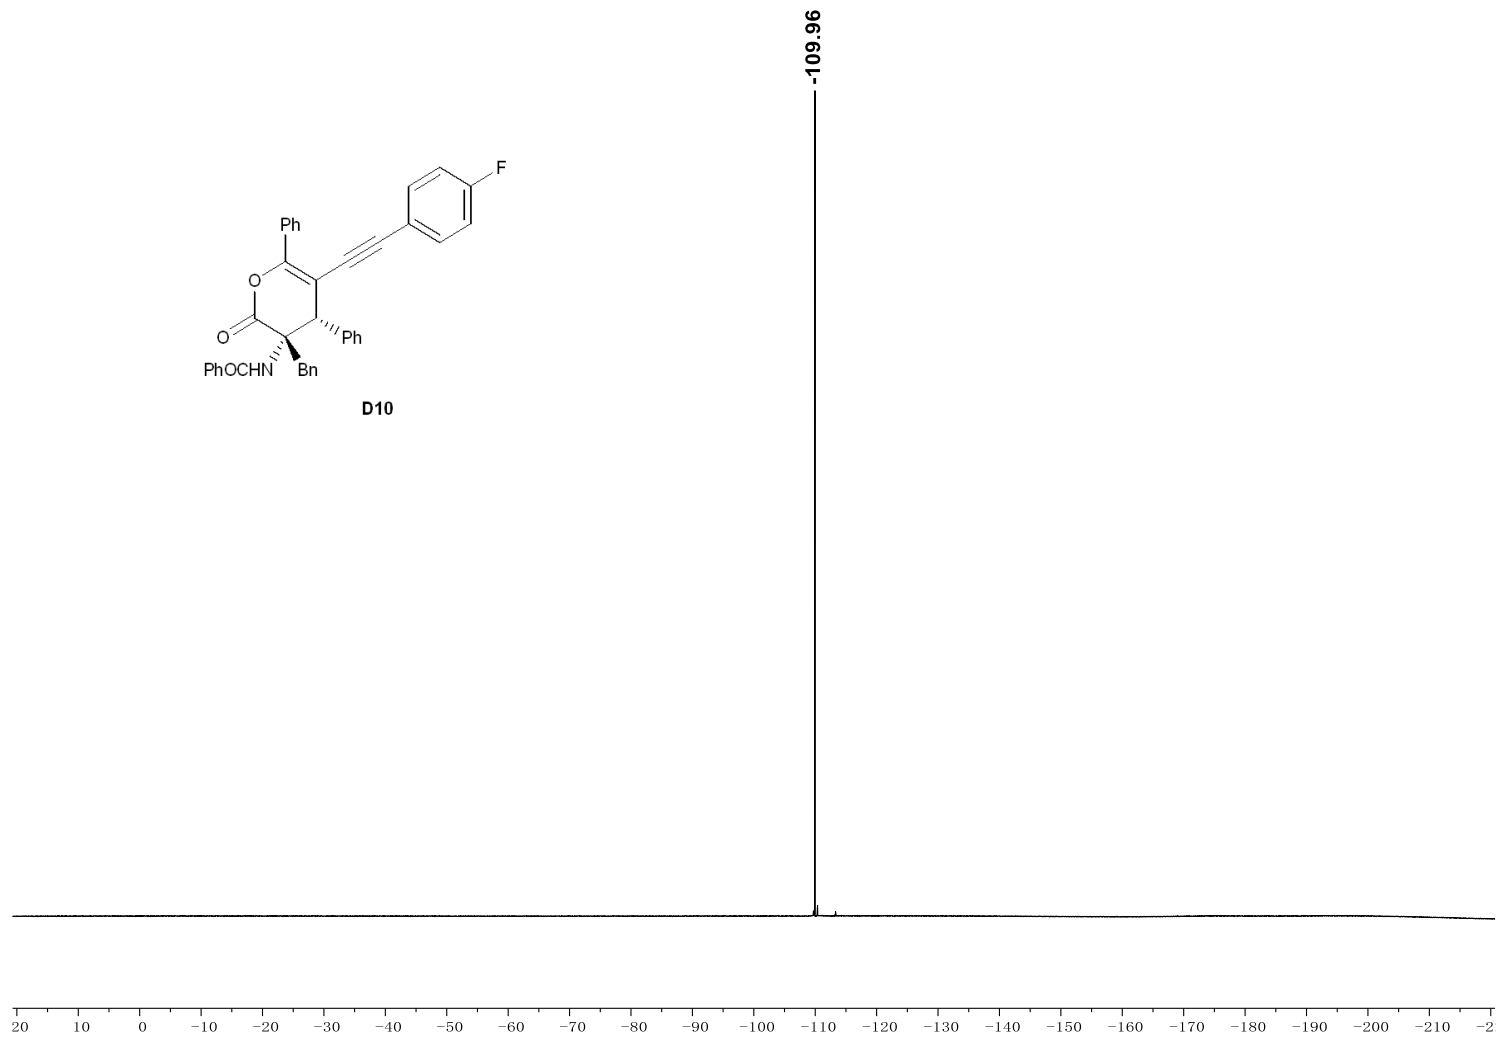

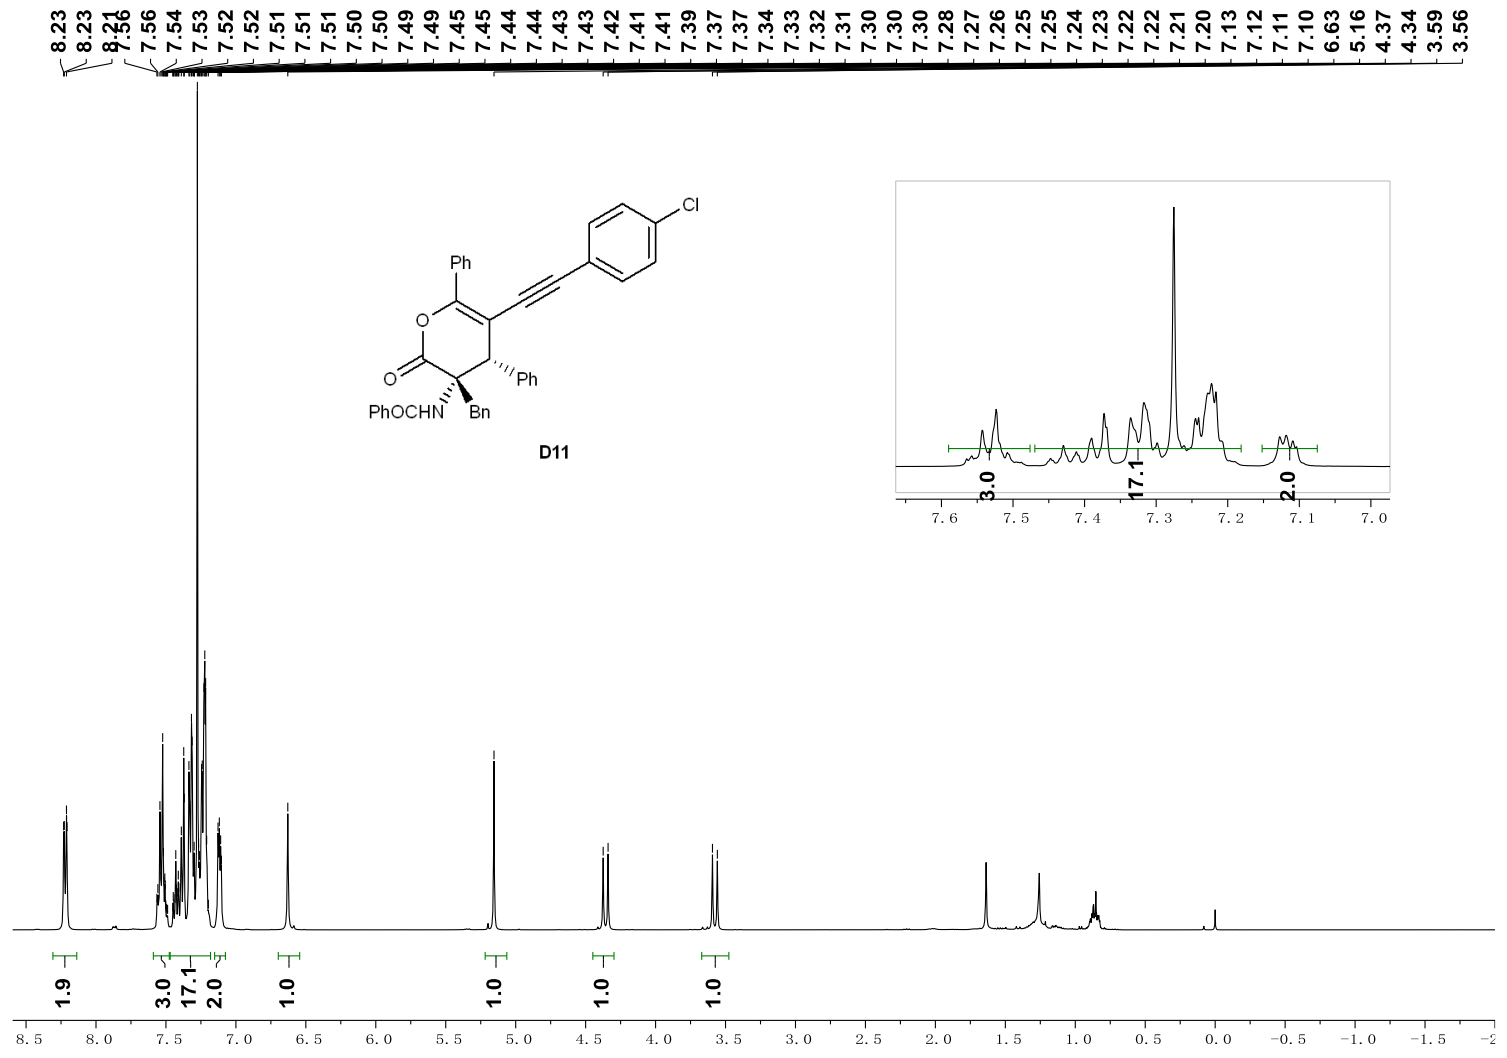

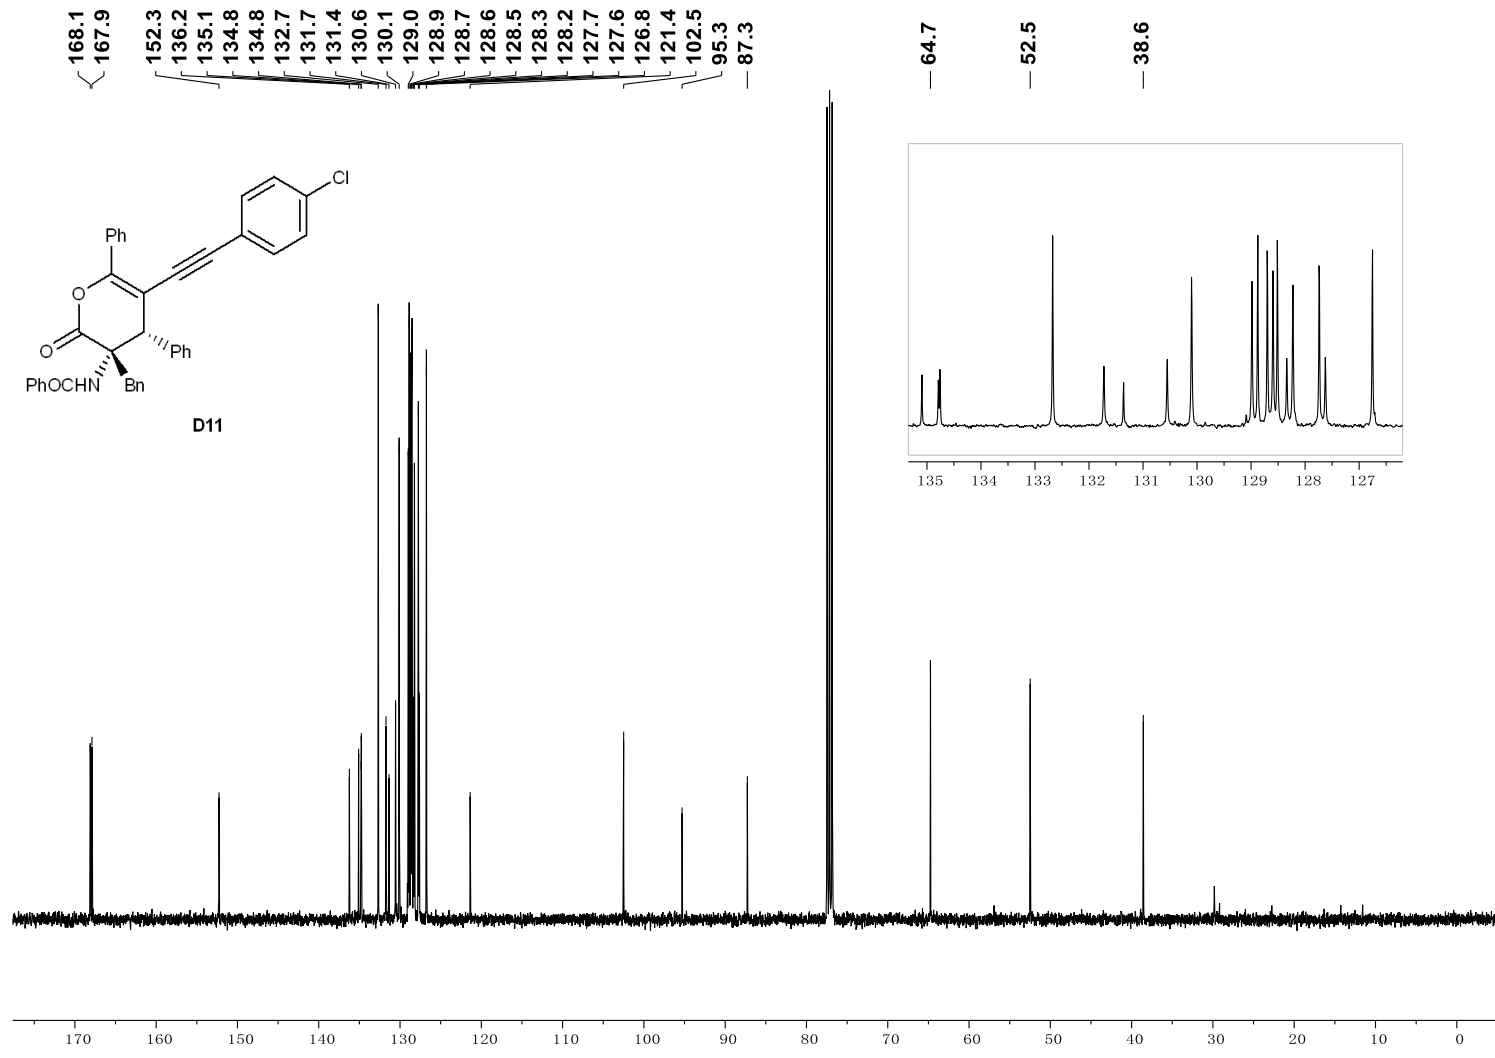



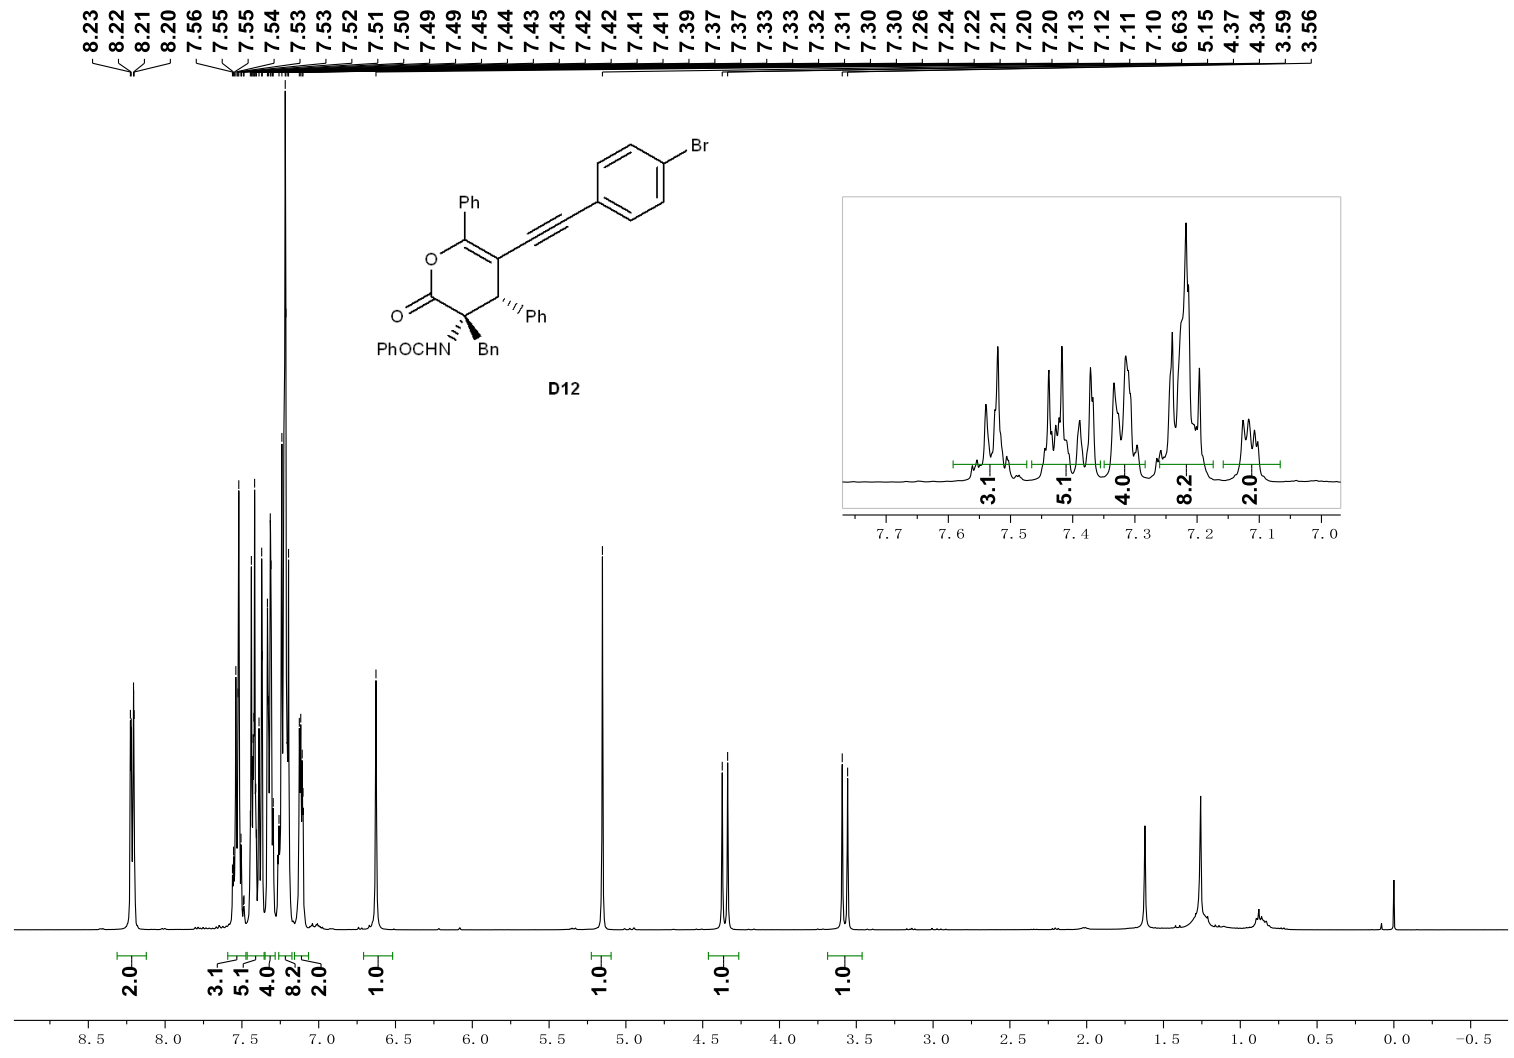

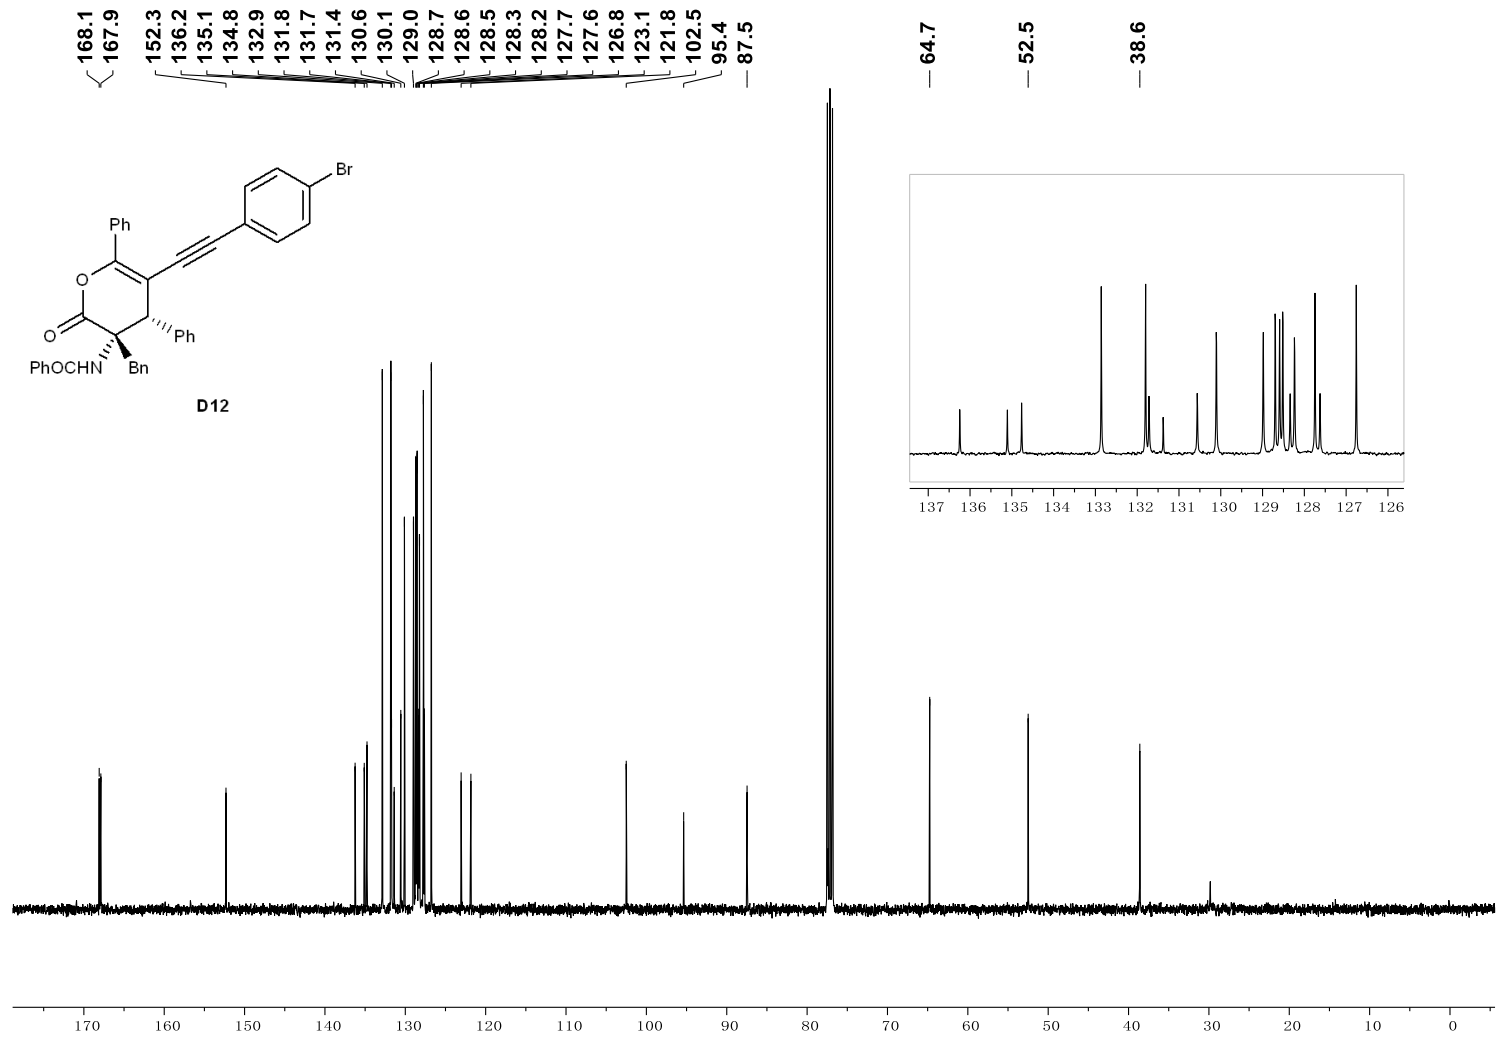

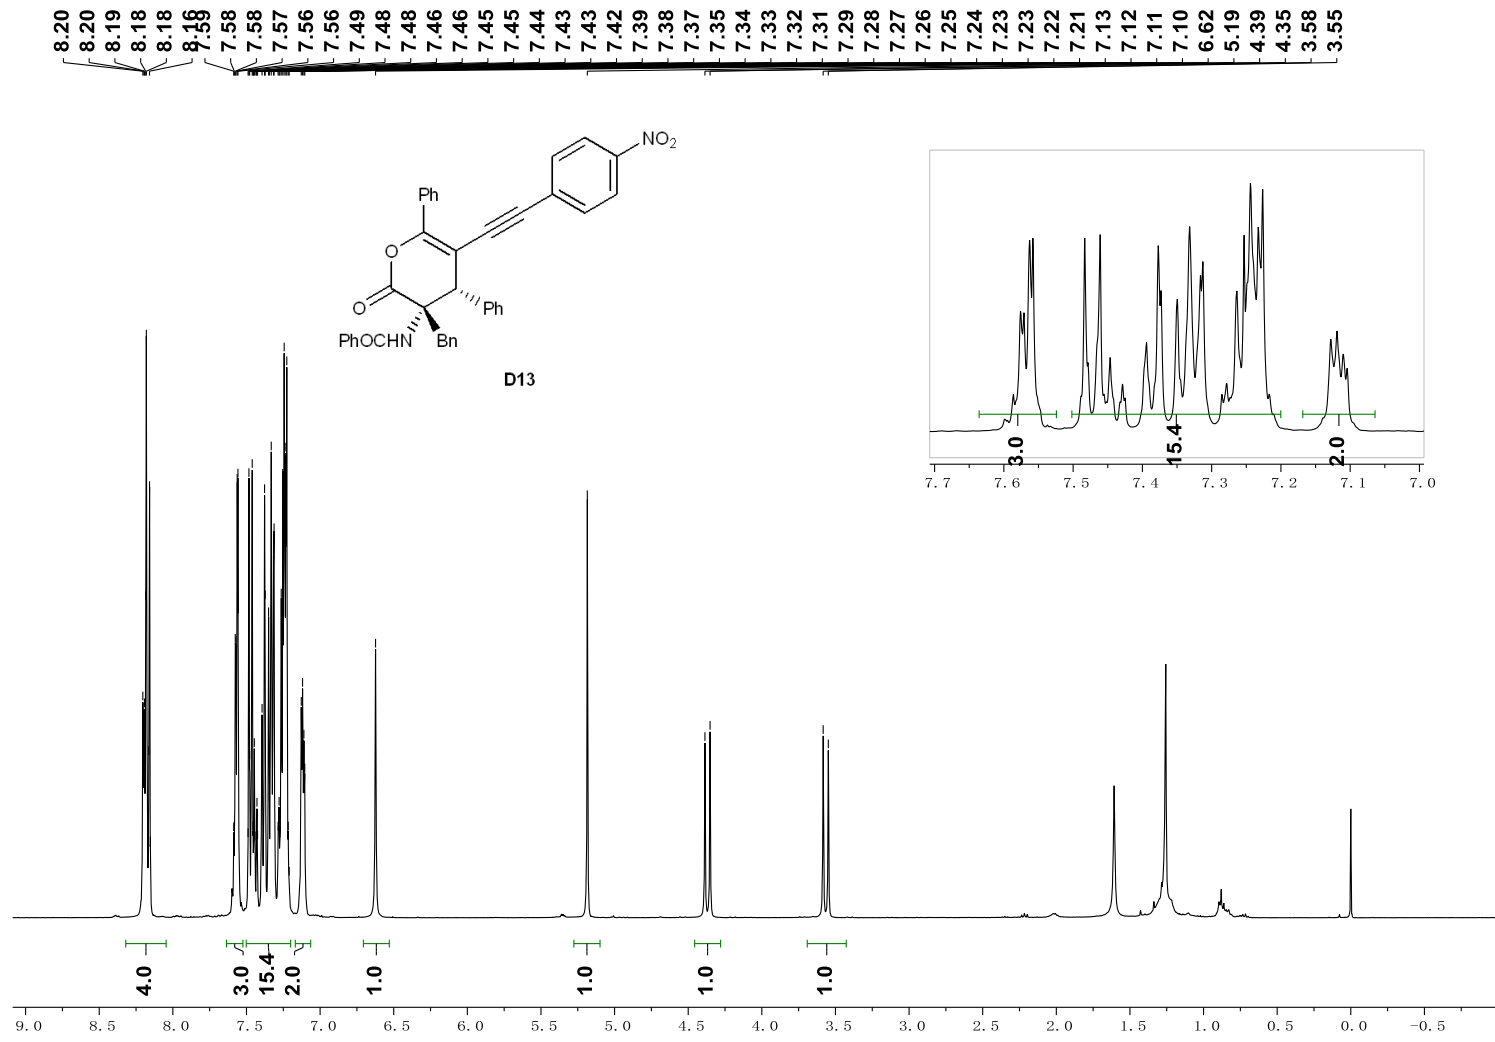

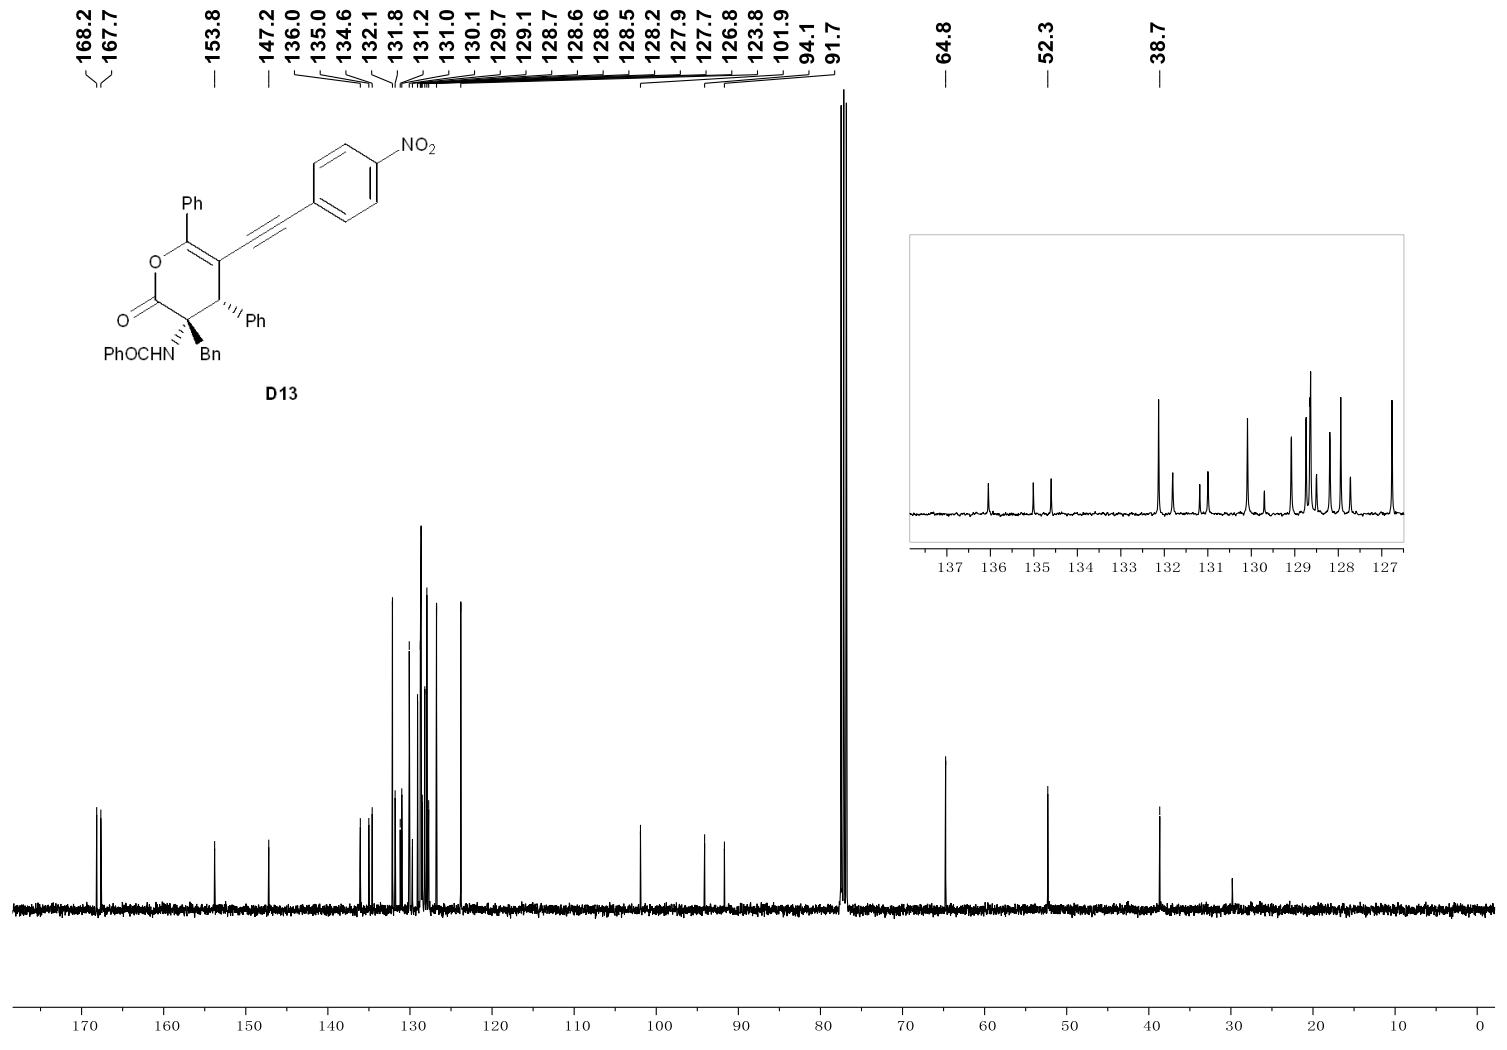

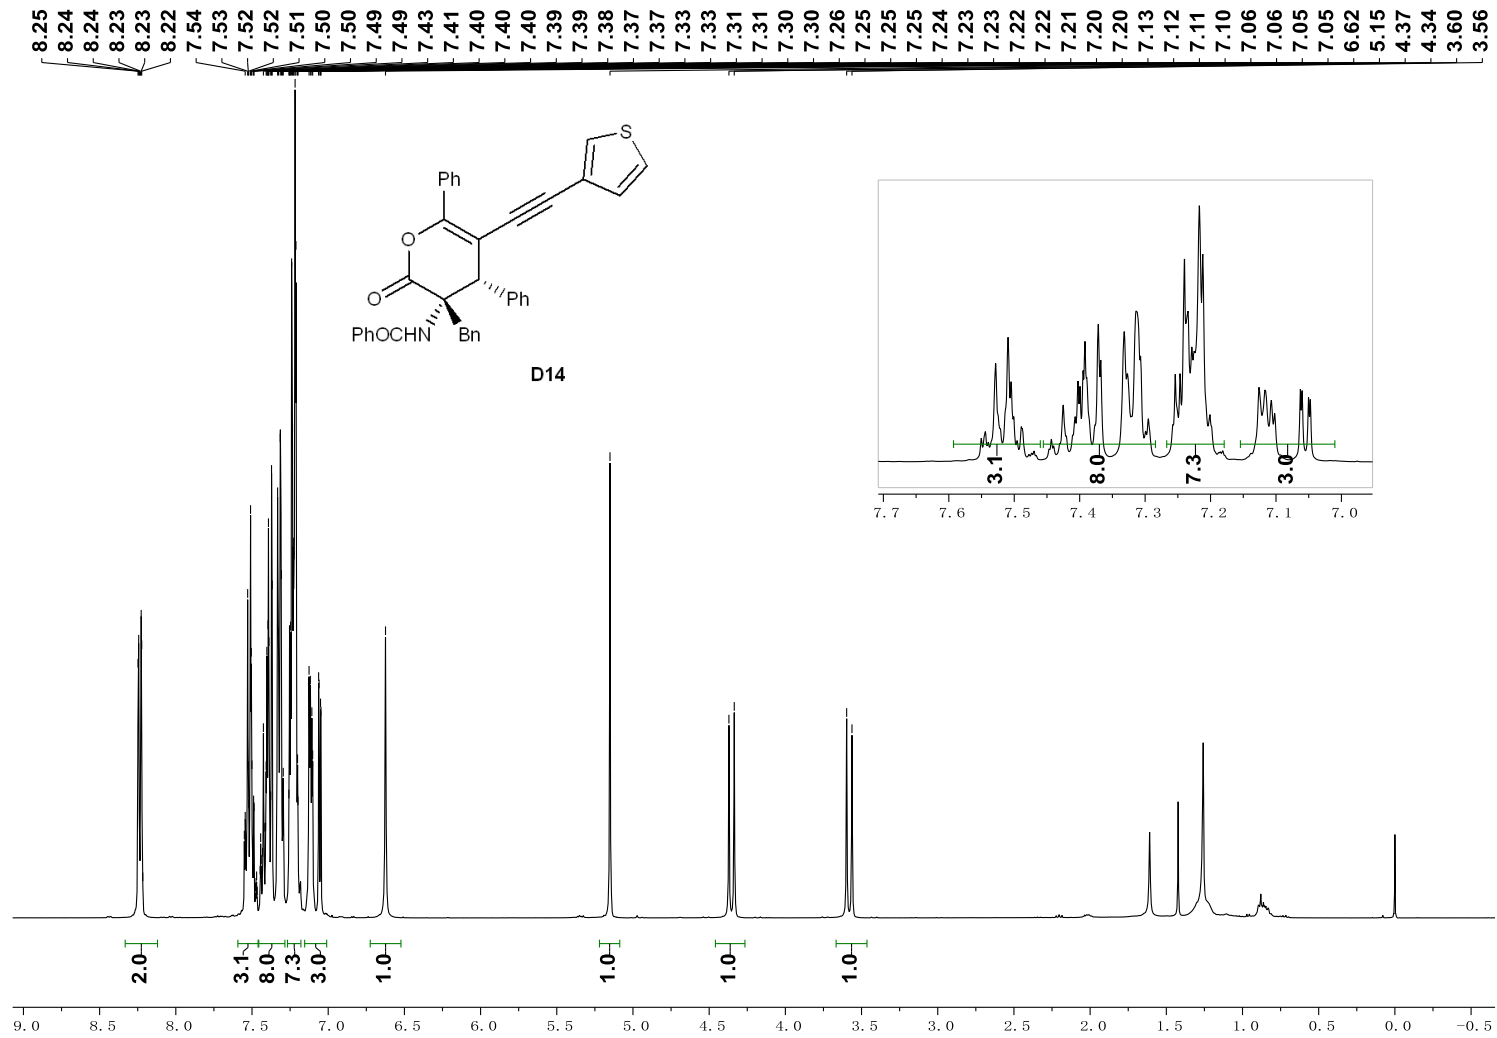

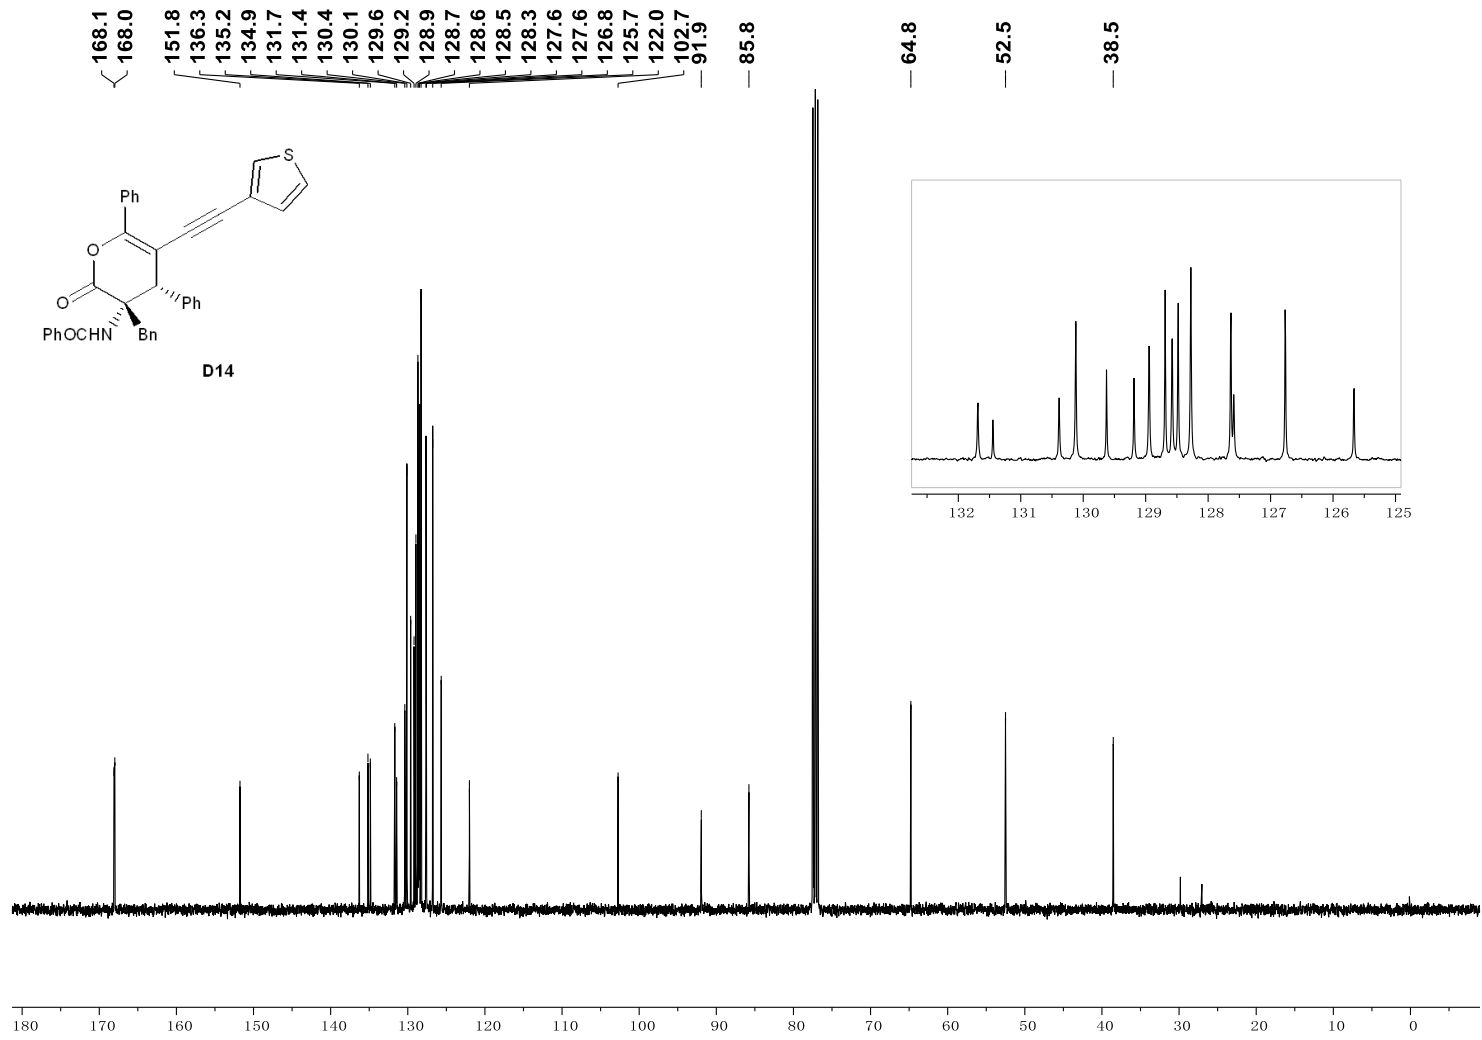

8.33  
8.32  
8.31  
8.30  
8.02  
8.00  
7.81  
7.80  
7.79  
7.78  
7.77  
7.59  
7.58  
7.57  
7.56  
7.55  
7.53  
7.51  
7.49  
7.48  
7.47  
7.46  
7.45  
7.44  
7.44  
7.43  
7.43  
7.42  
7.41  
7.38  
7.37  
7.34  
7.32  
7.30  
7.28  
7.26  
7.24  
7.23  
7.23  
7.22  
7.21  
7.20  
7.16  
7.15  
7.14  
7.14  
6.69  
5.29  
4.44  
4.40  
3.68  
3.64

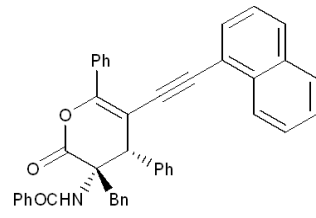

D15

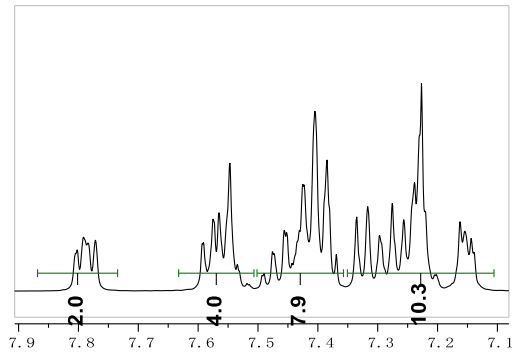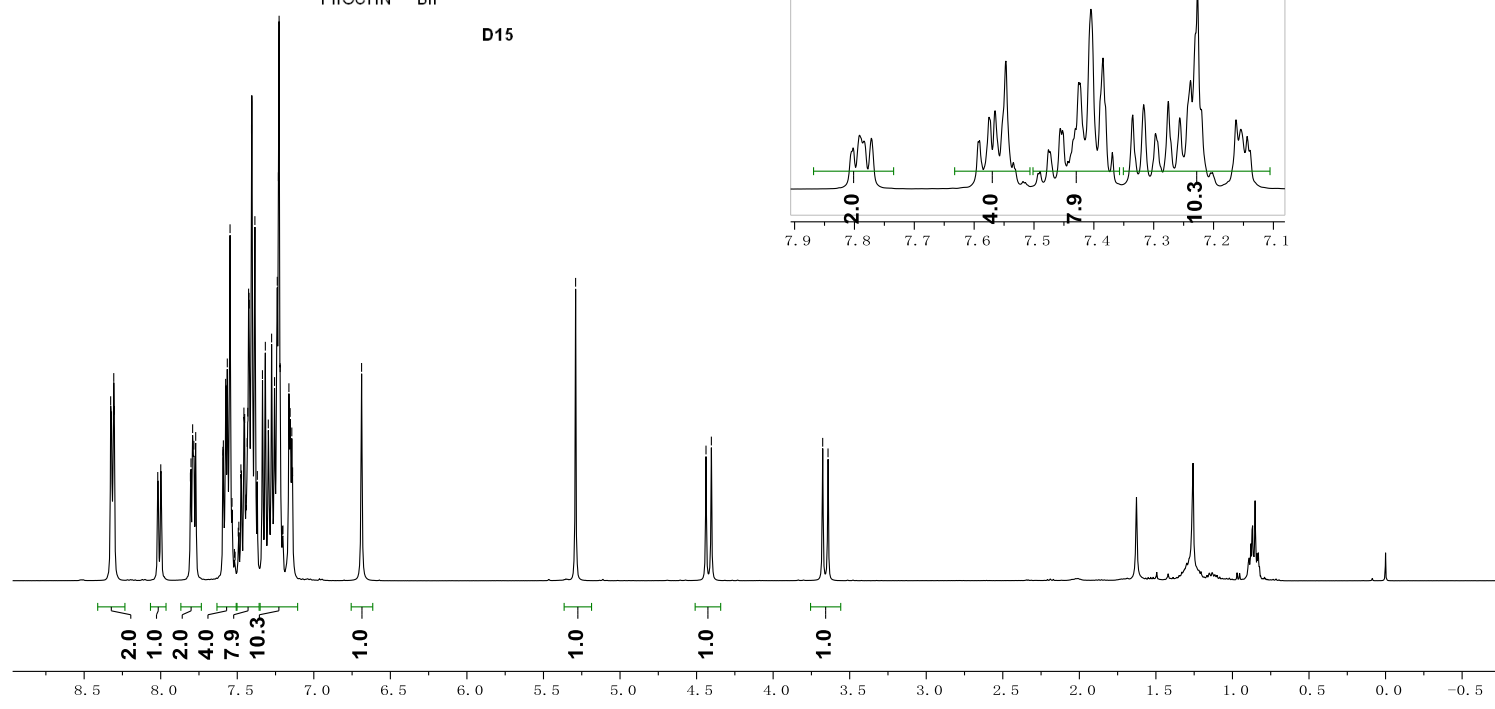

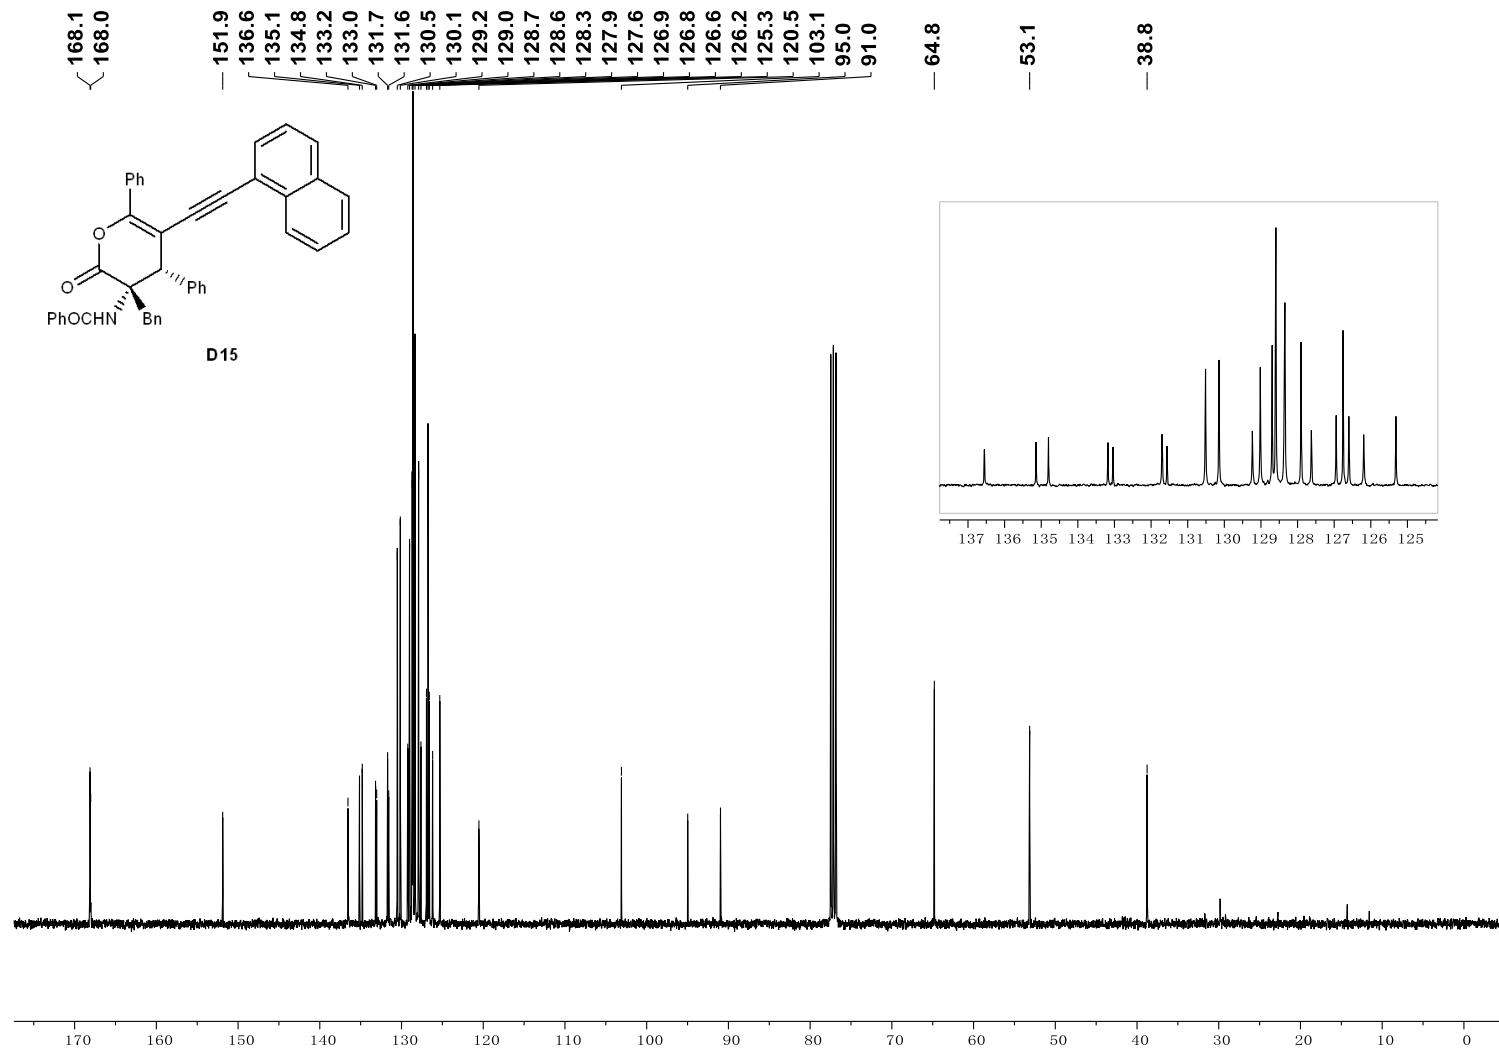



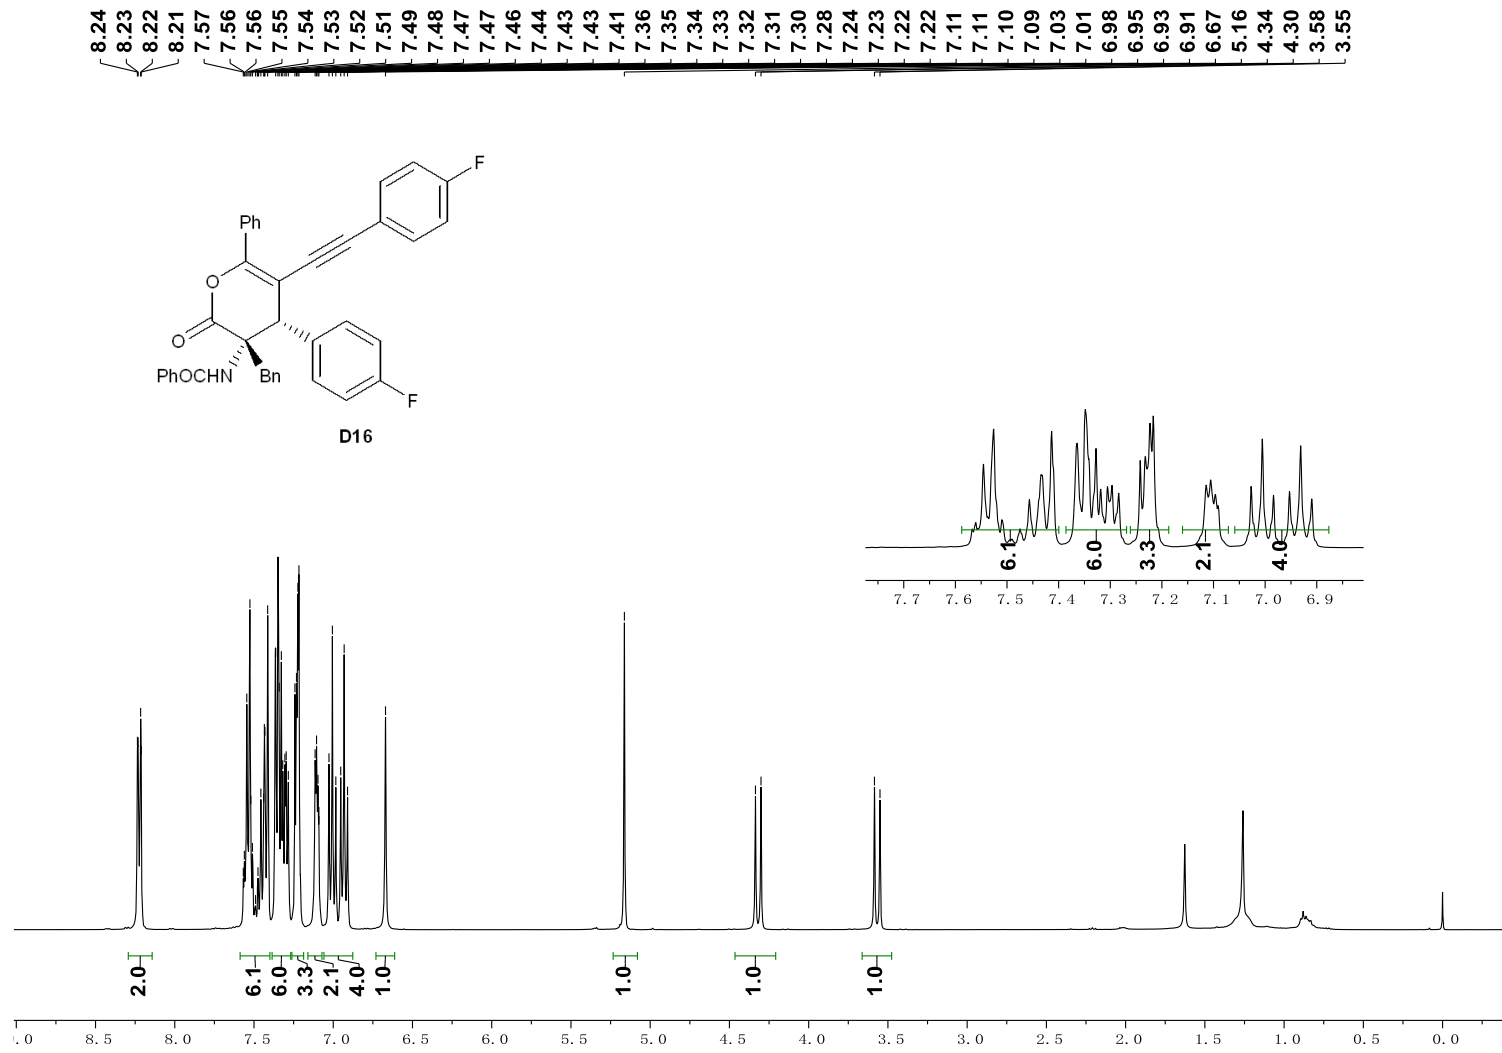

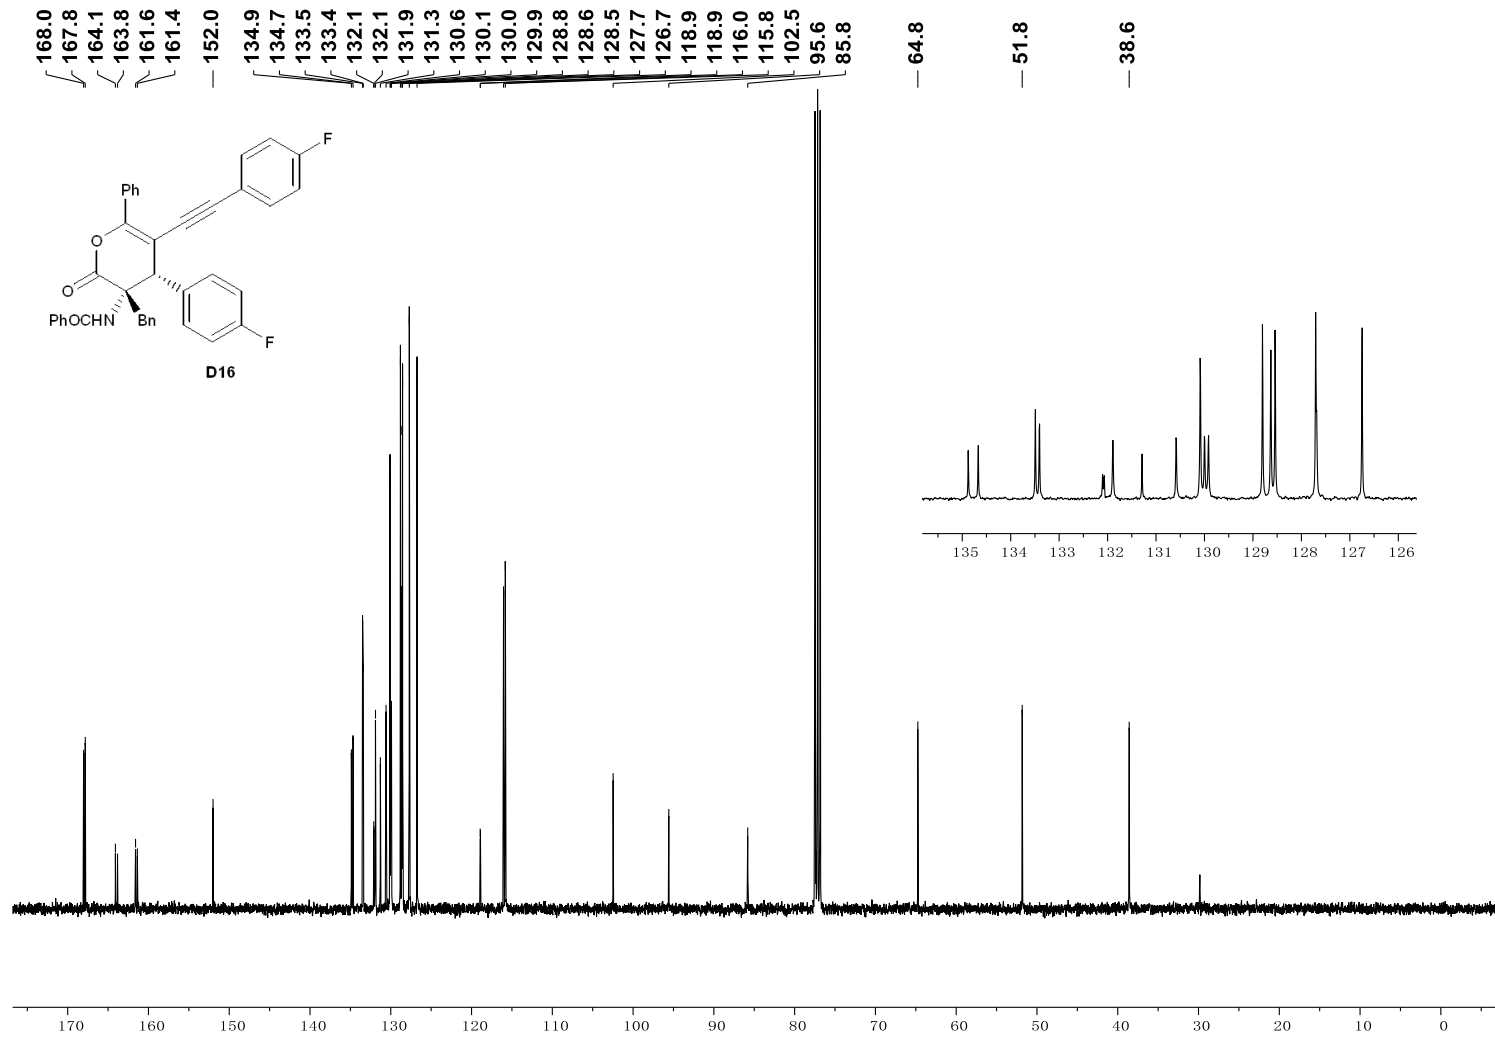

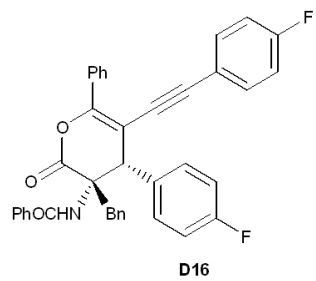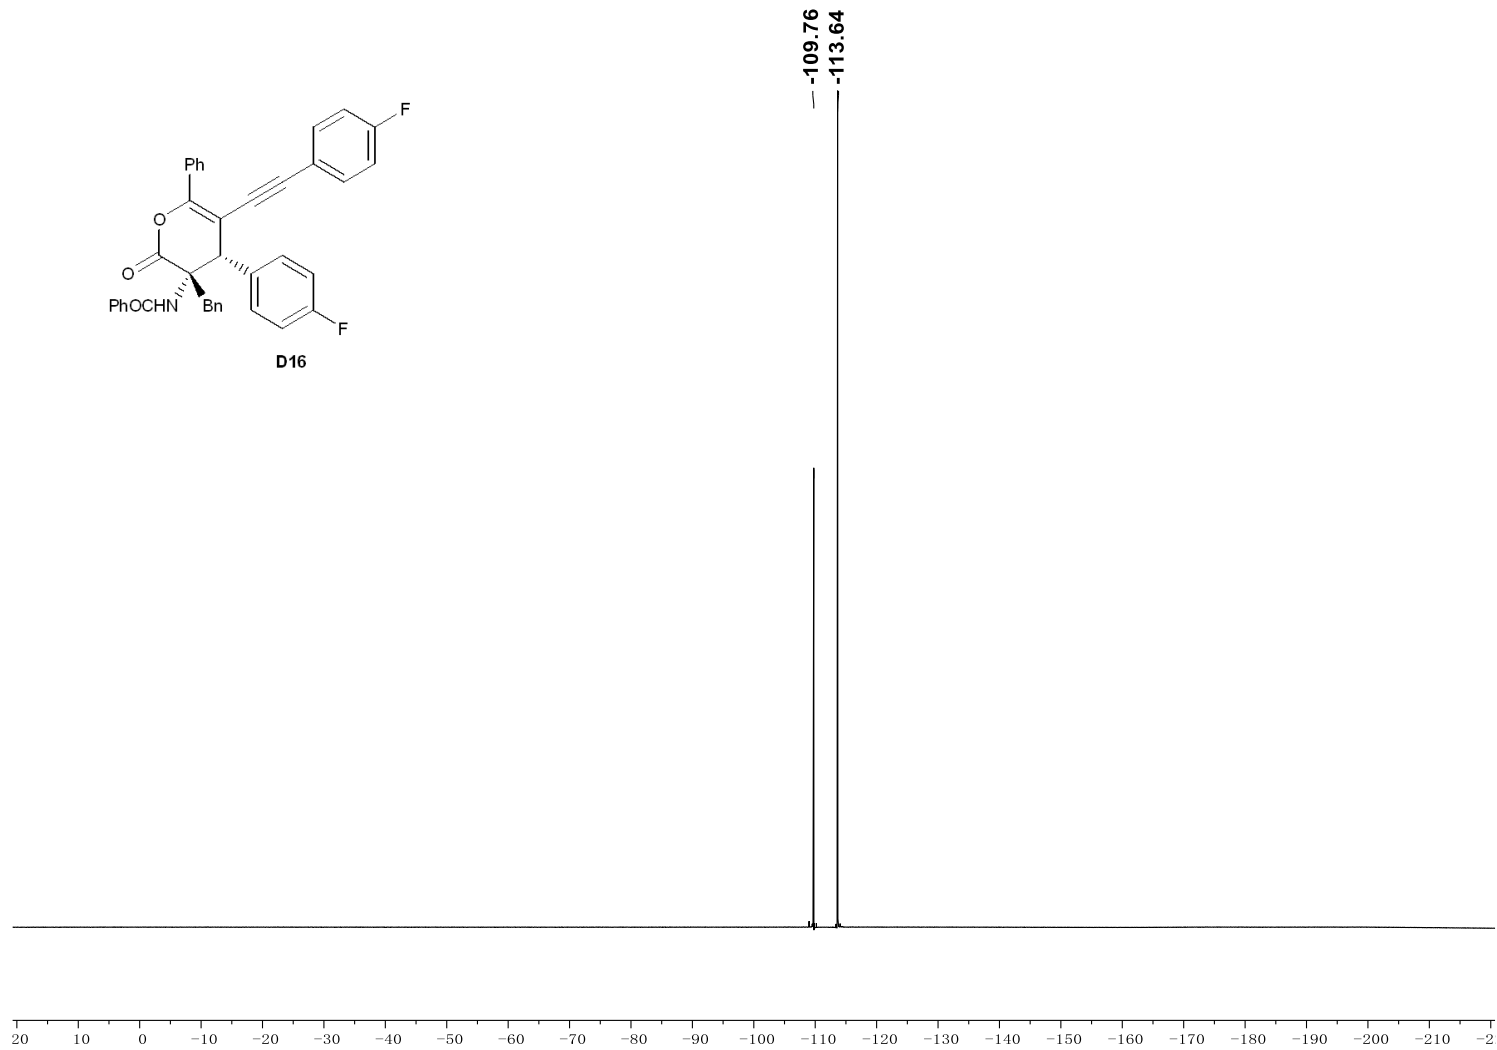

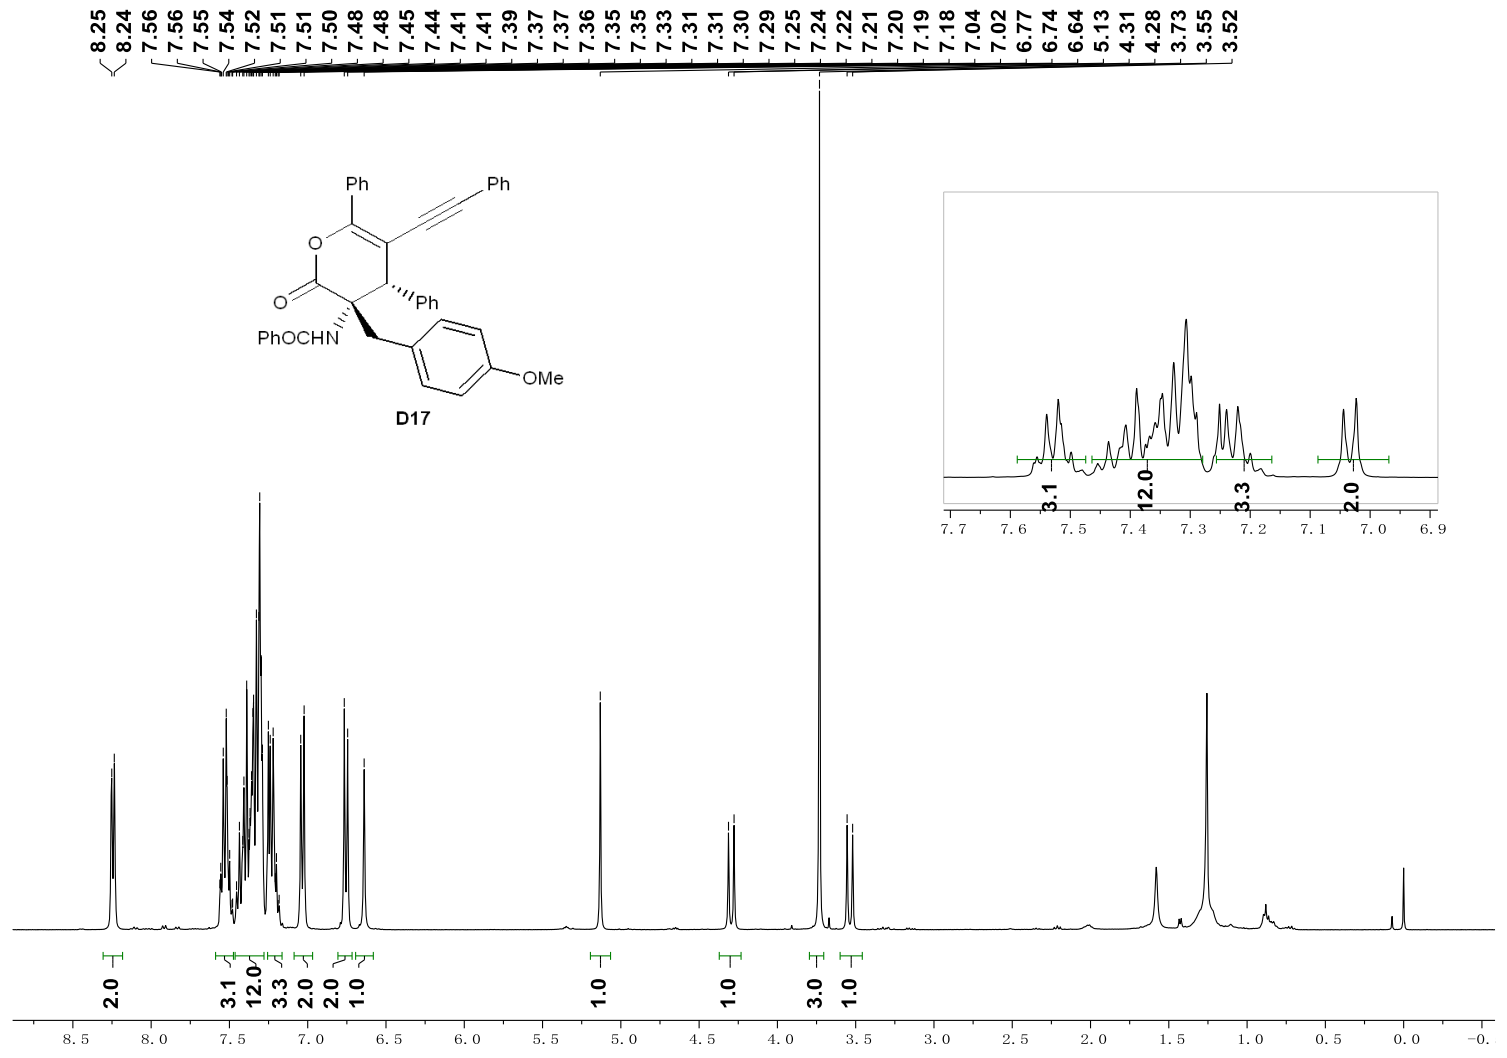

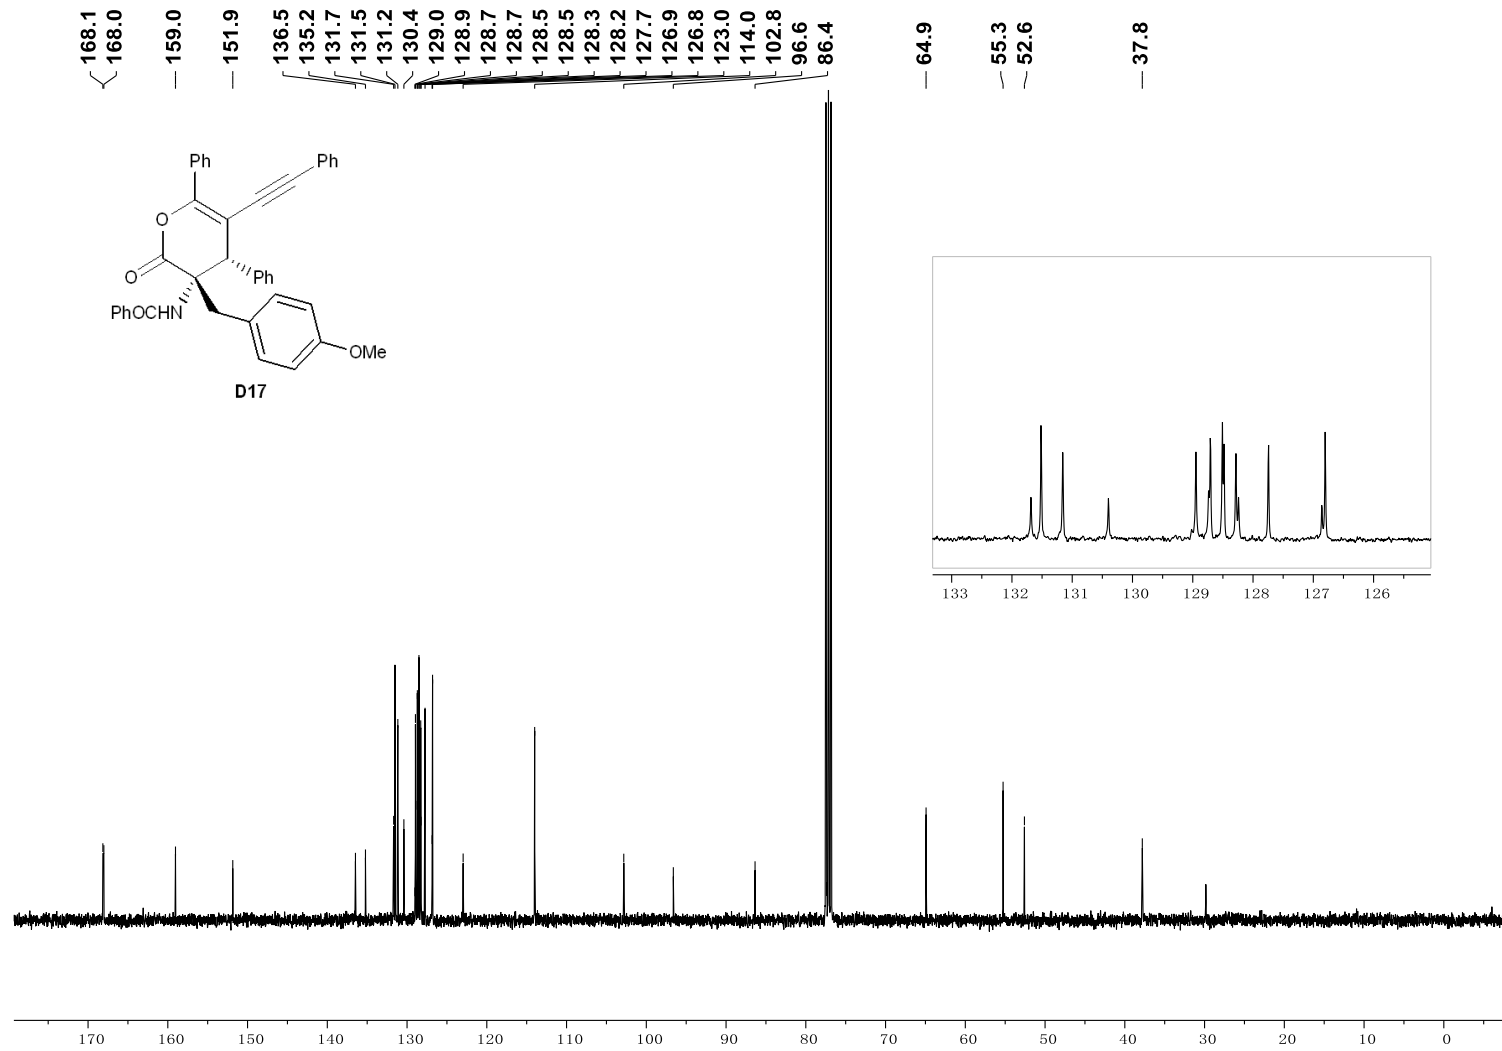

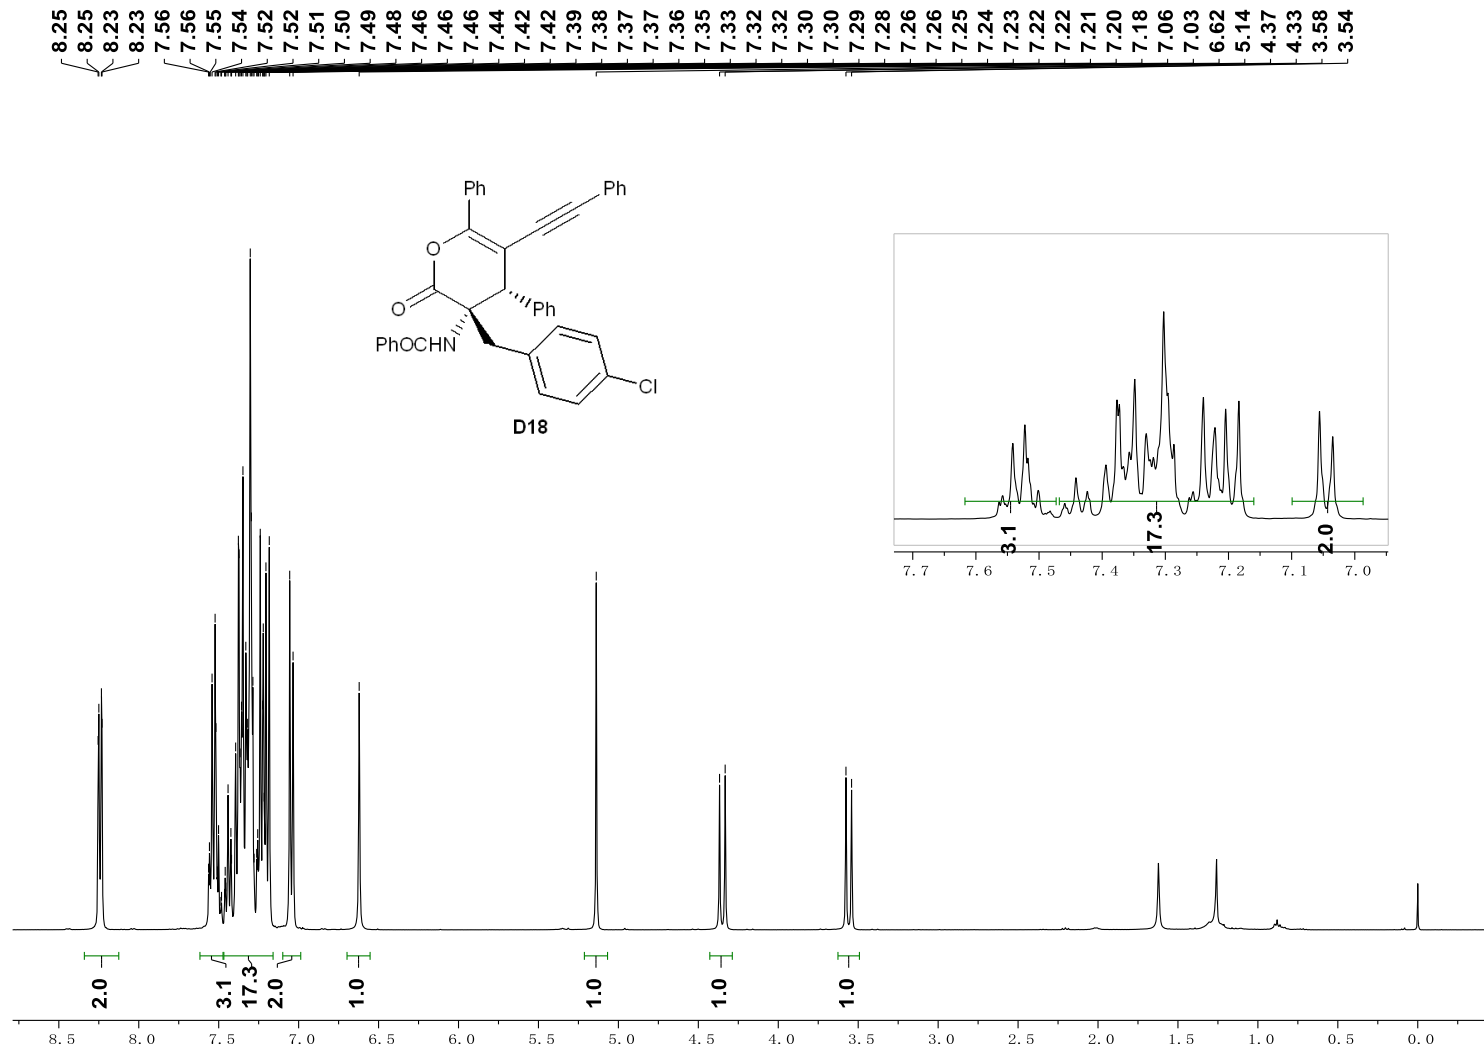

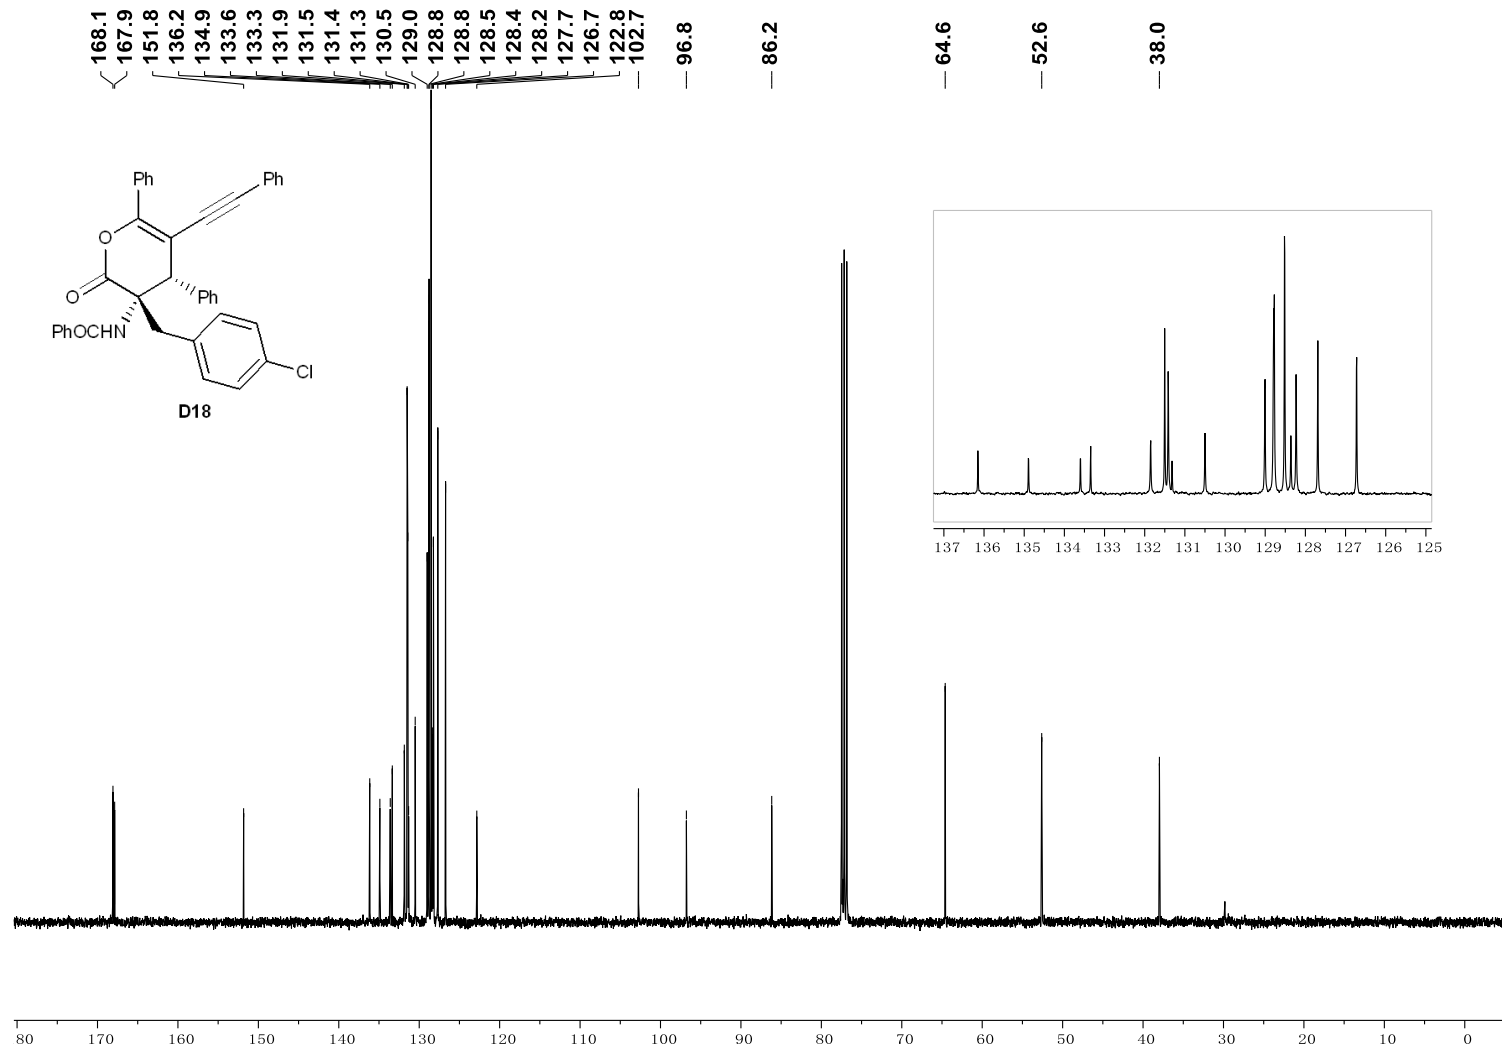

8.25  
8.23  
7.56  
7.55  
7.54  
7.52  
7.50  
7.48  
7.46  
7.44  
7.42  
7.39  
7.38  
7.37  
7.36  
7.35  
7.35  
7.33  
7.32  
7.30  
7.28  
7.24  
7.22  
7.20  
7.18  
7.00  
6.98  
6.62  
5.14  
4.35  
4.32  
3.56  
3.53

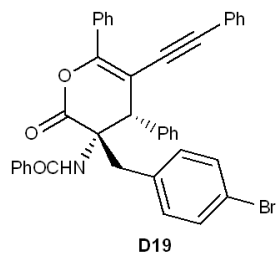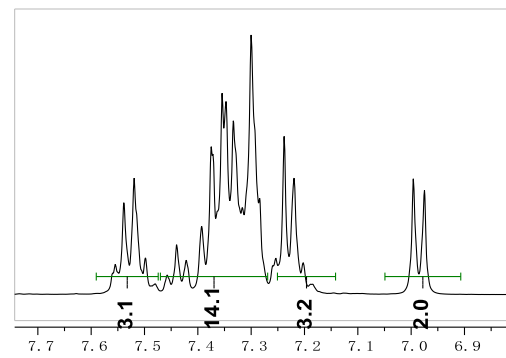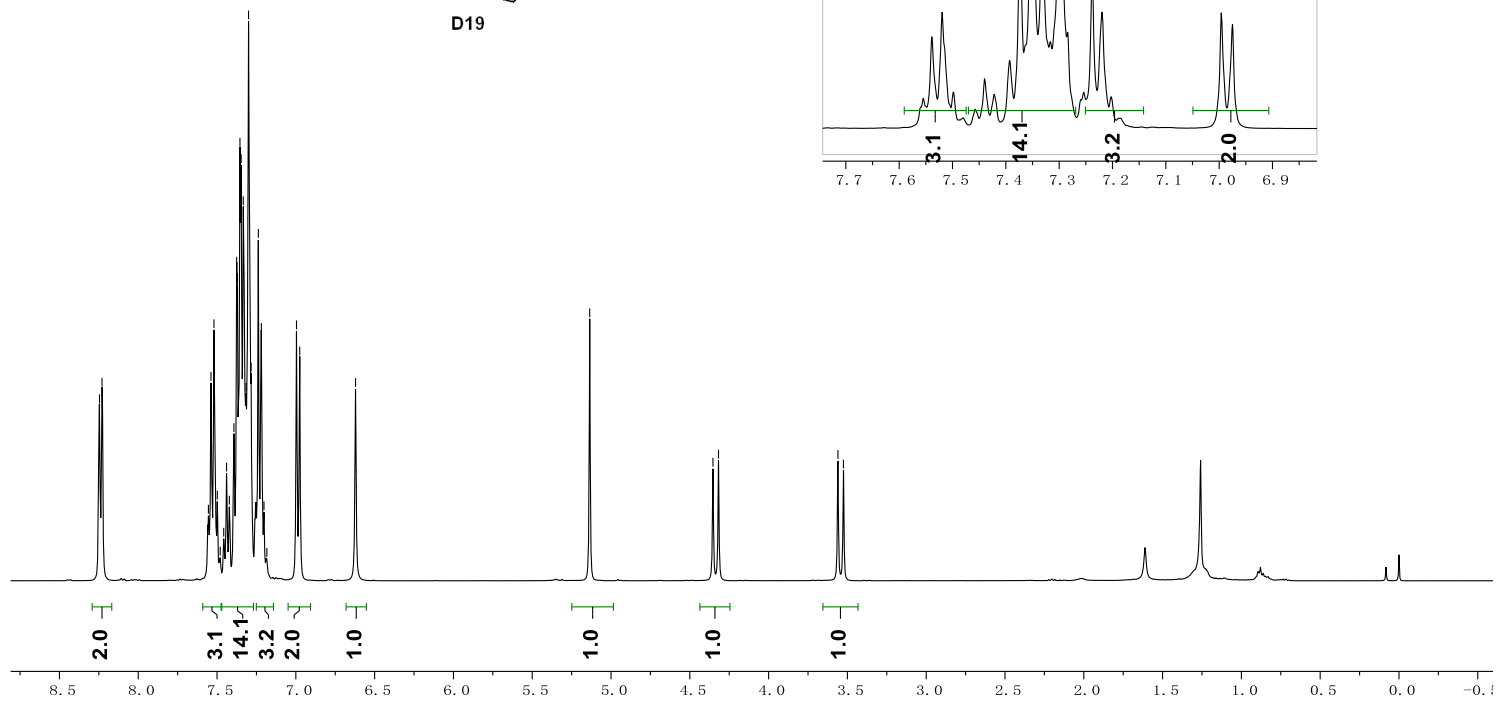



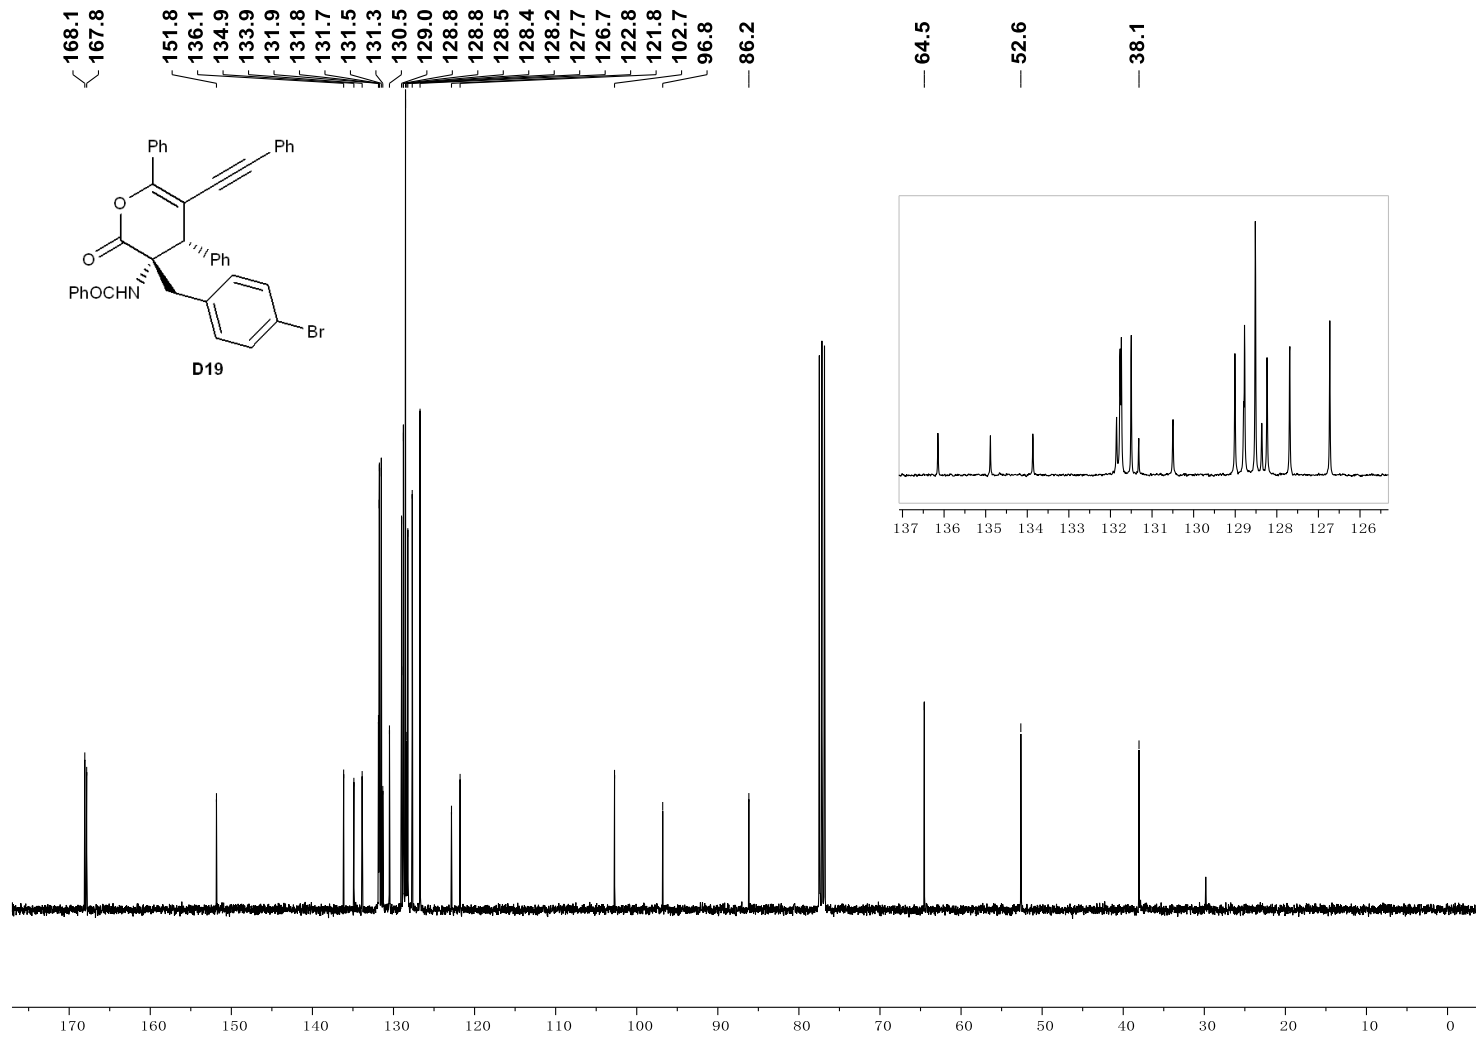

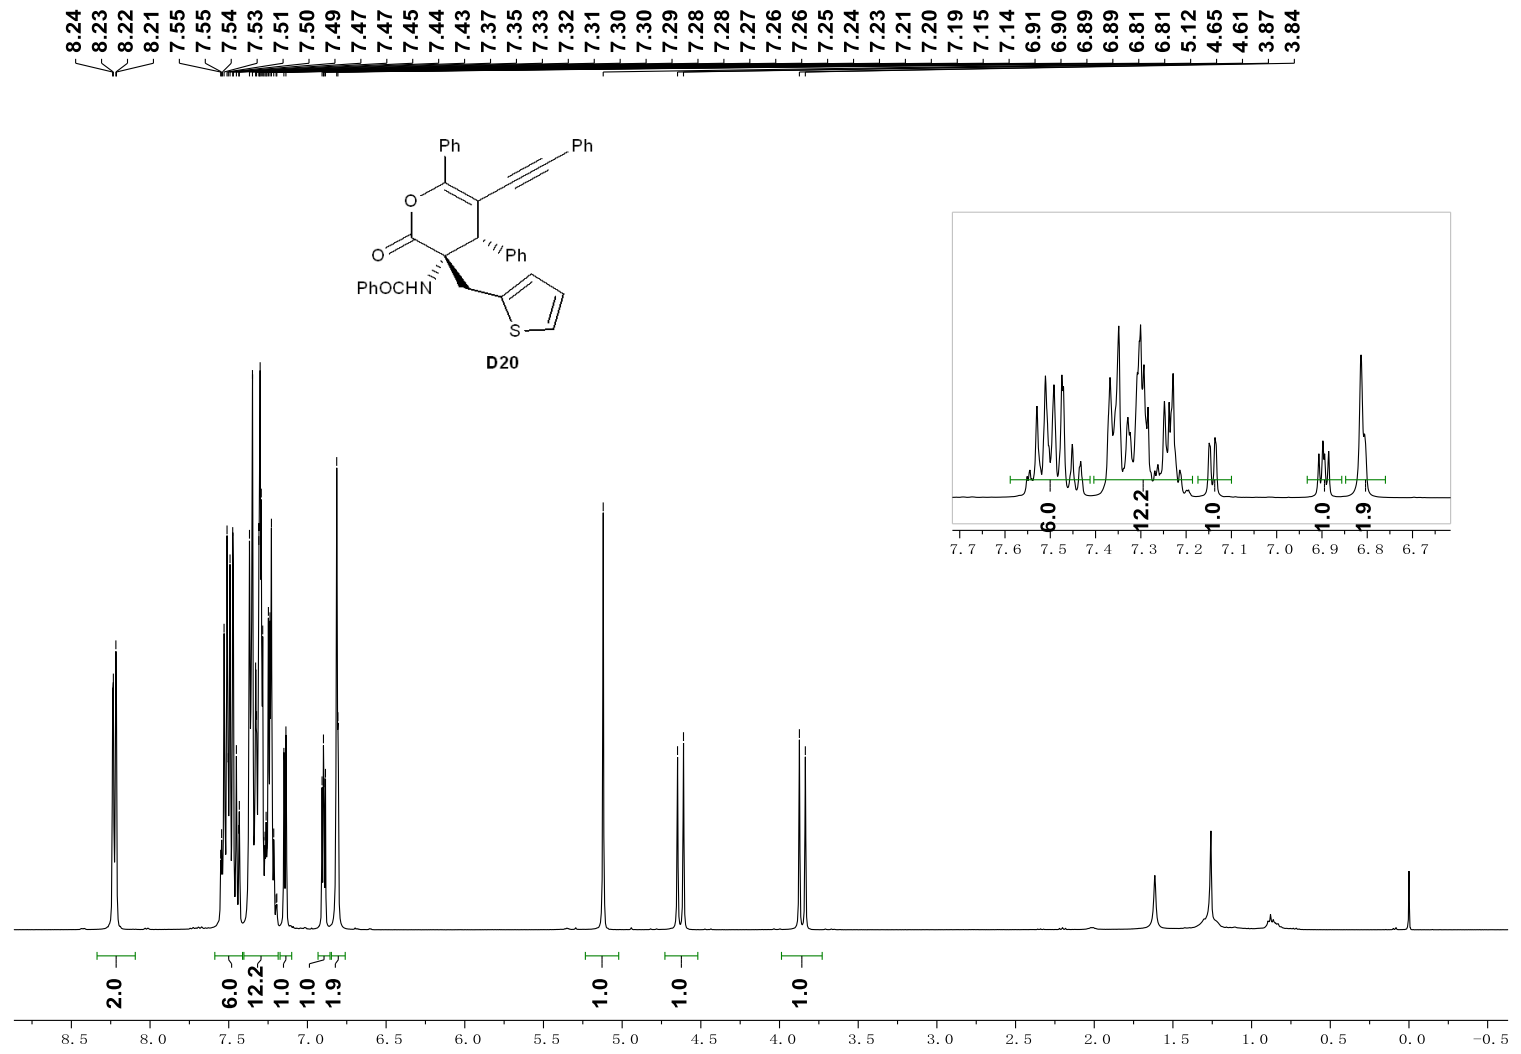

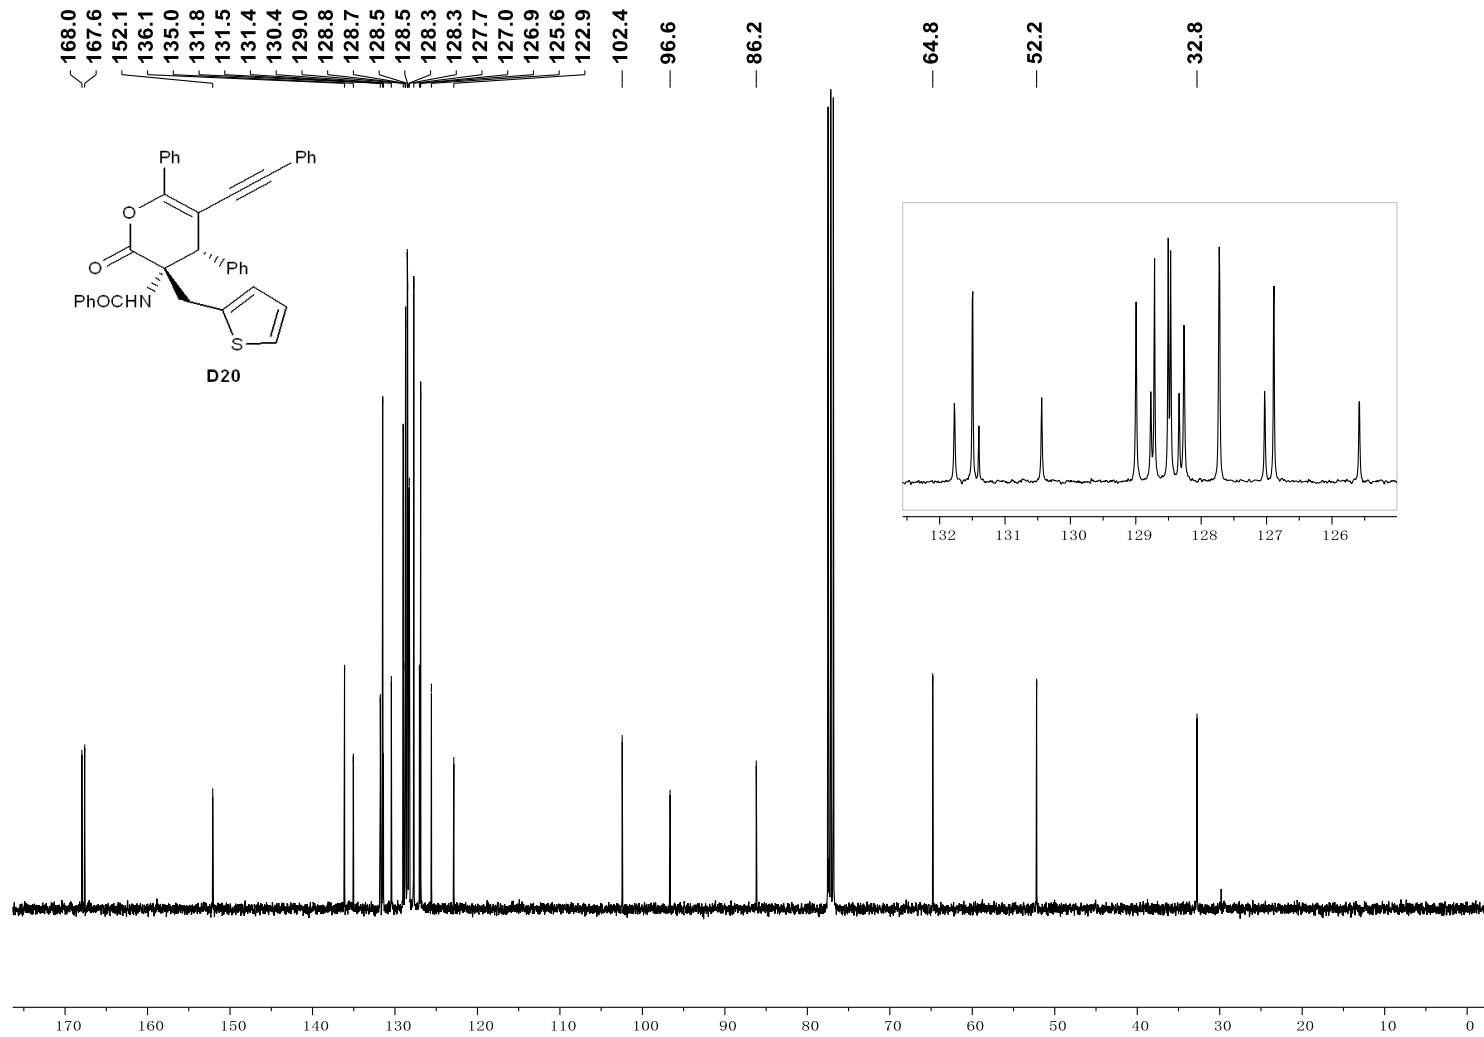

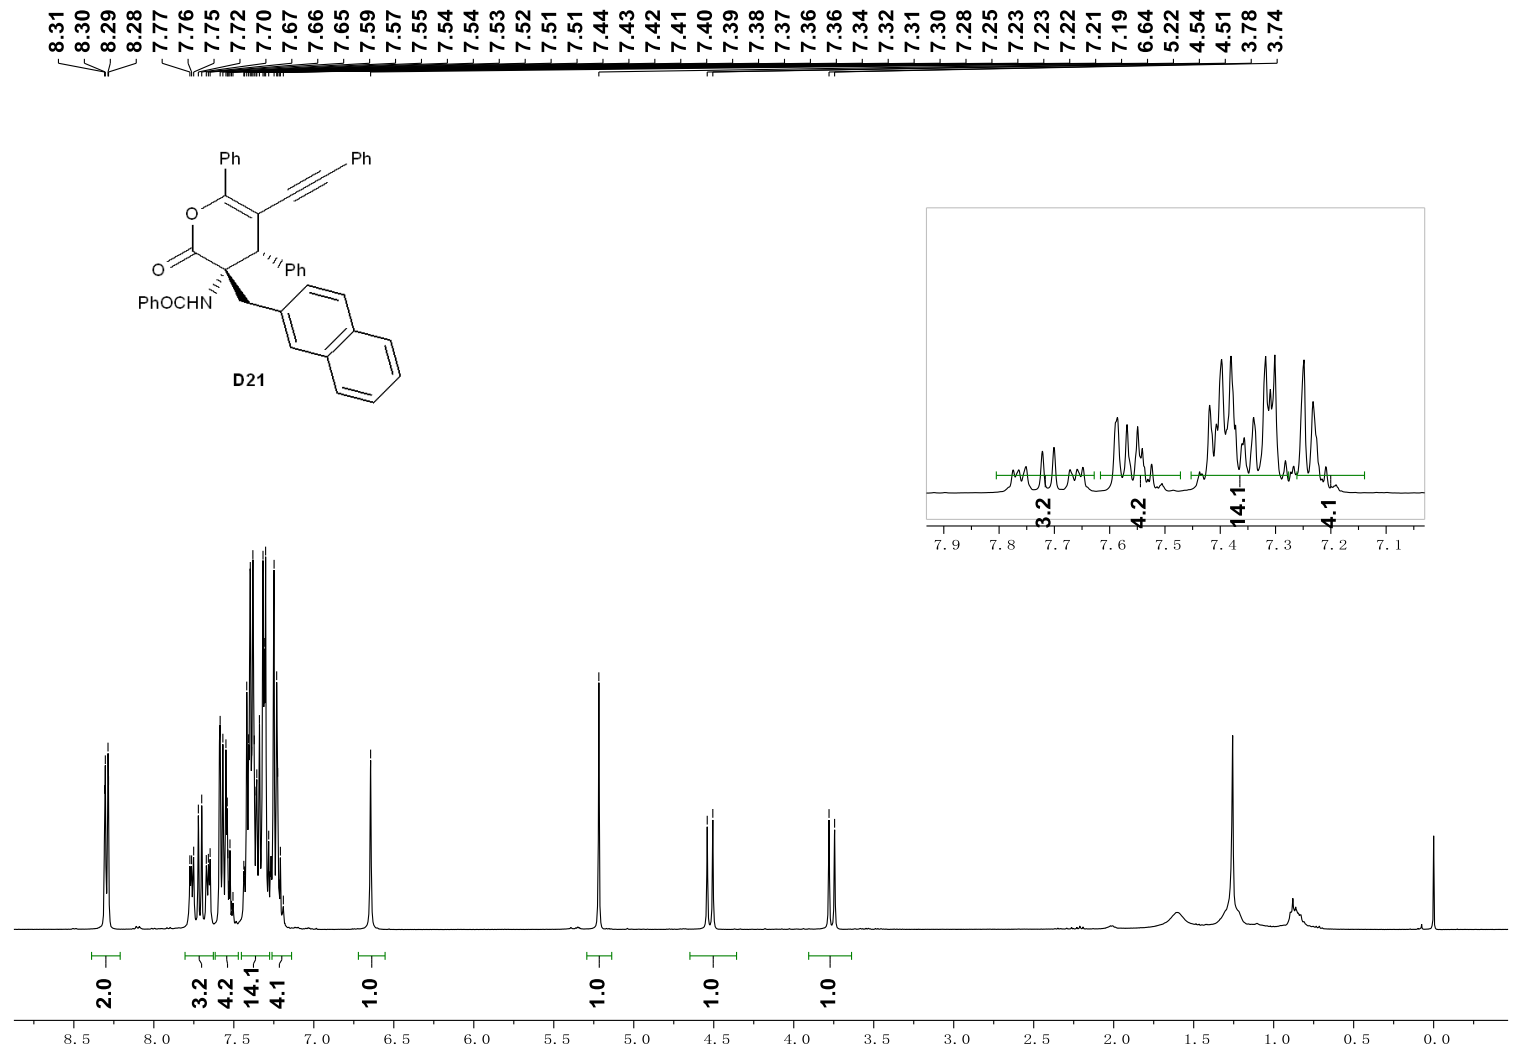

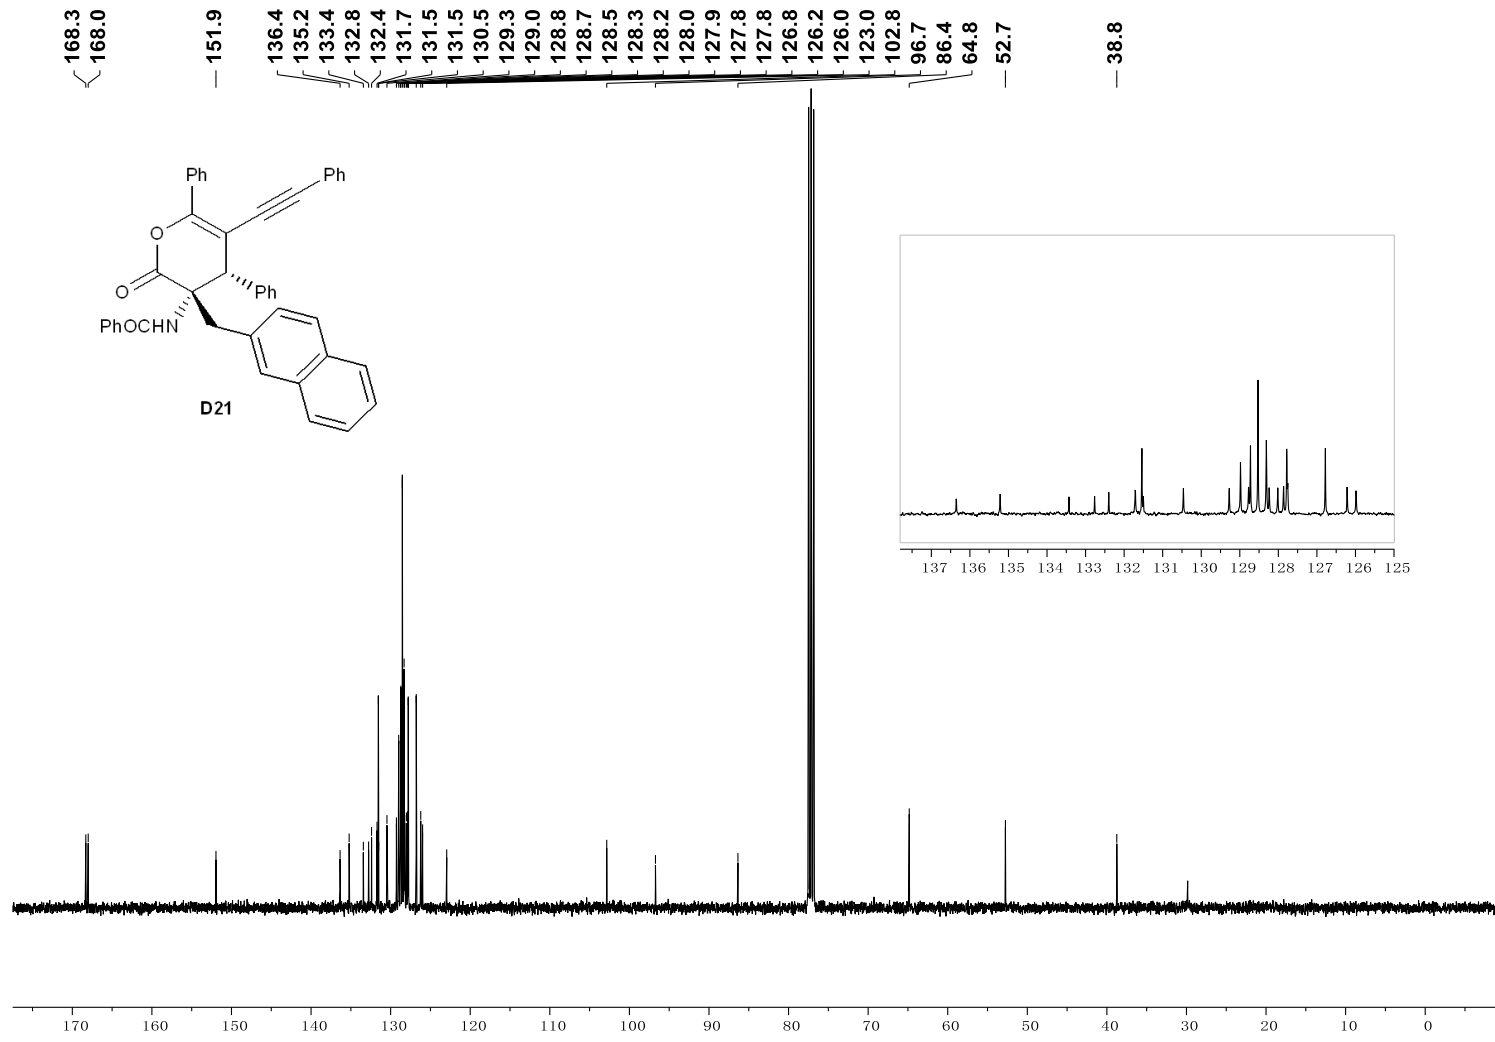

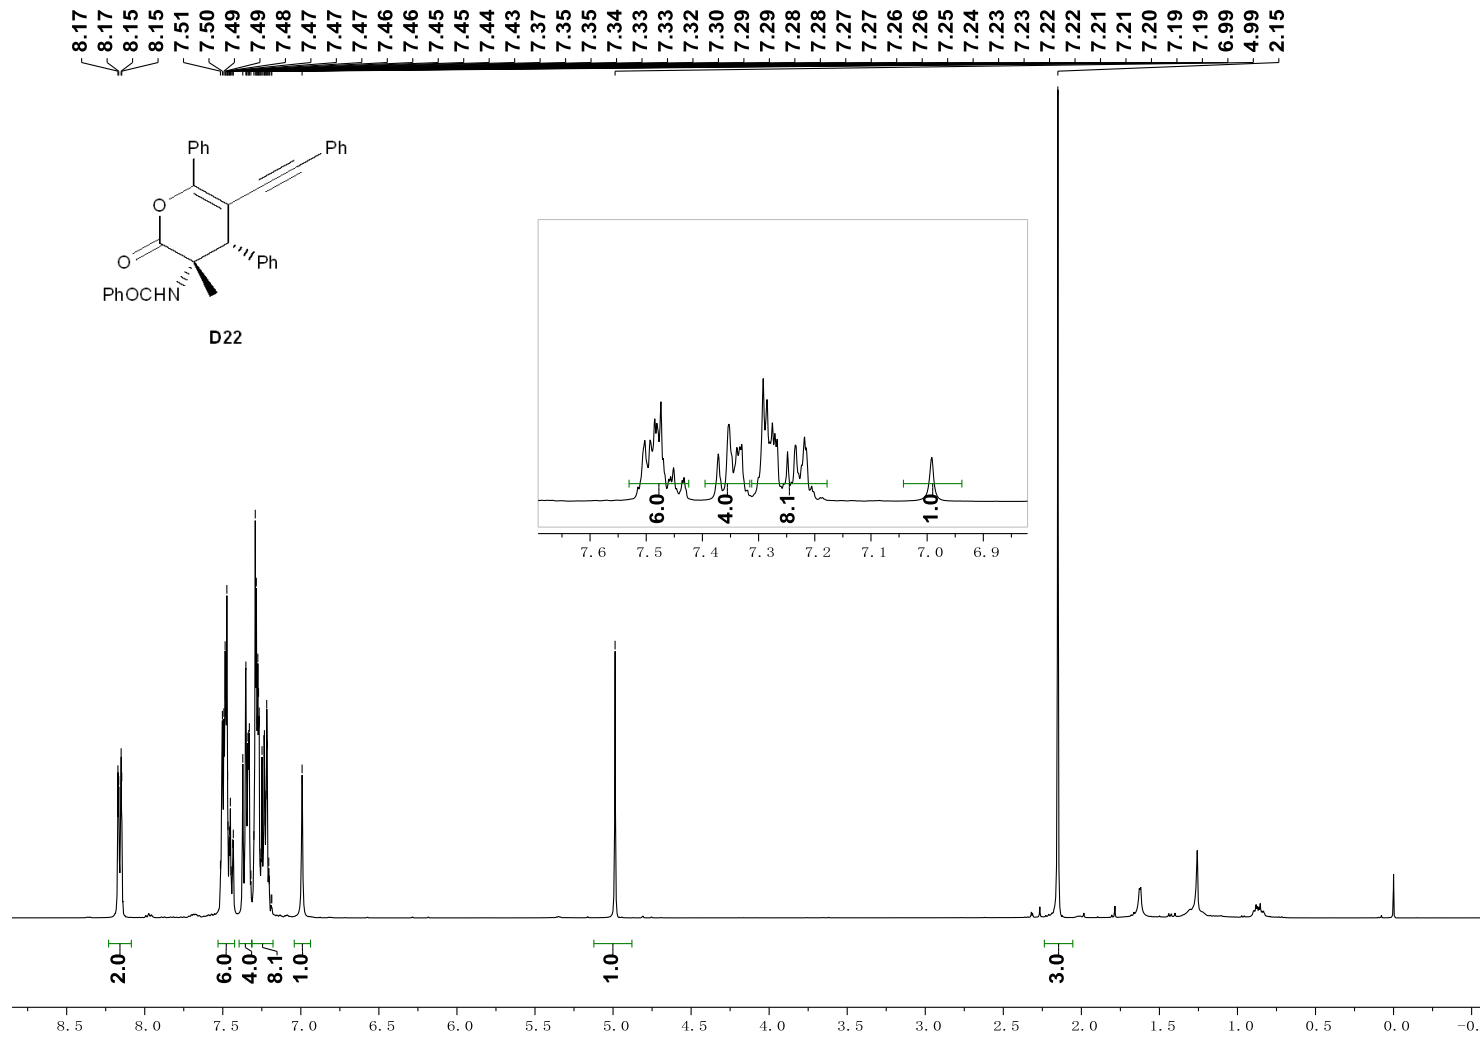

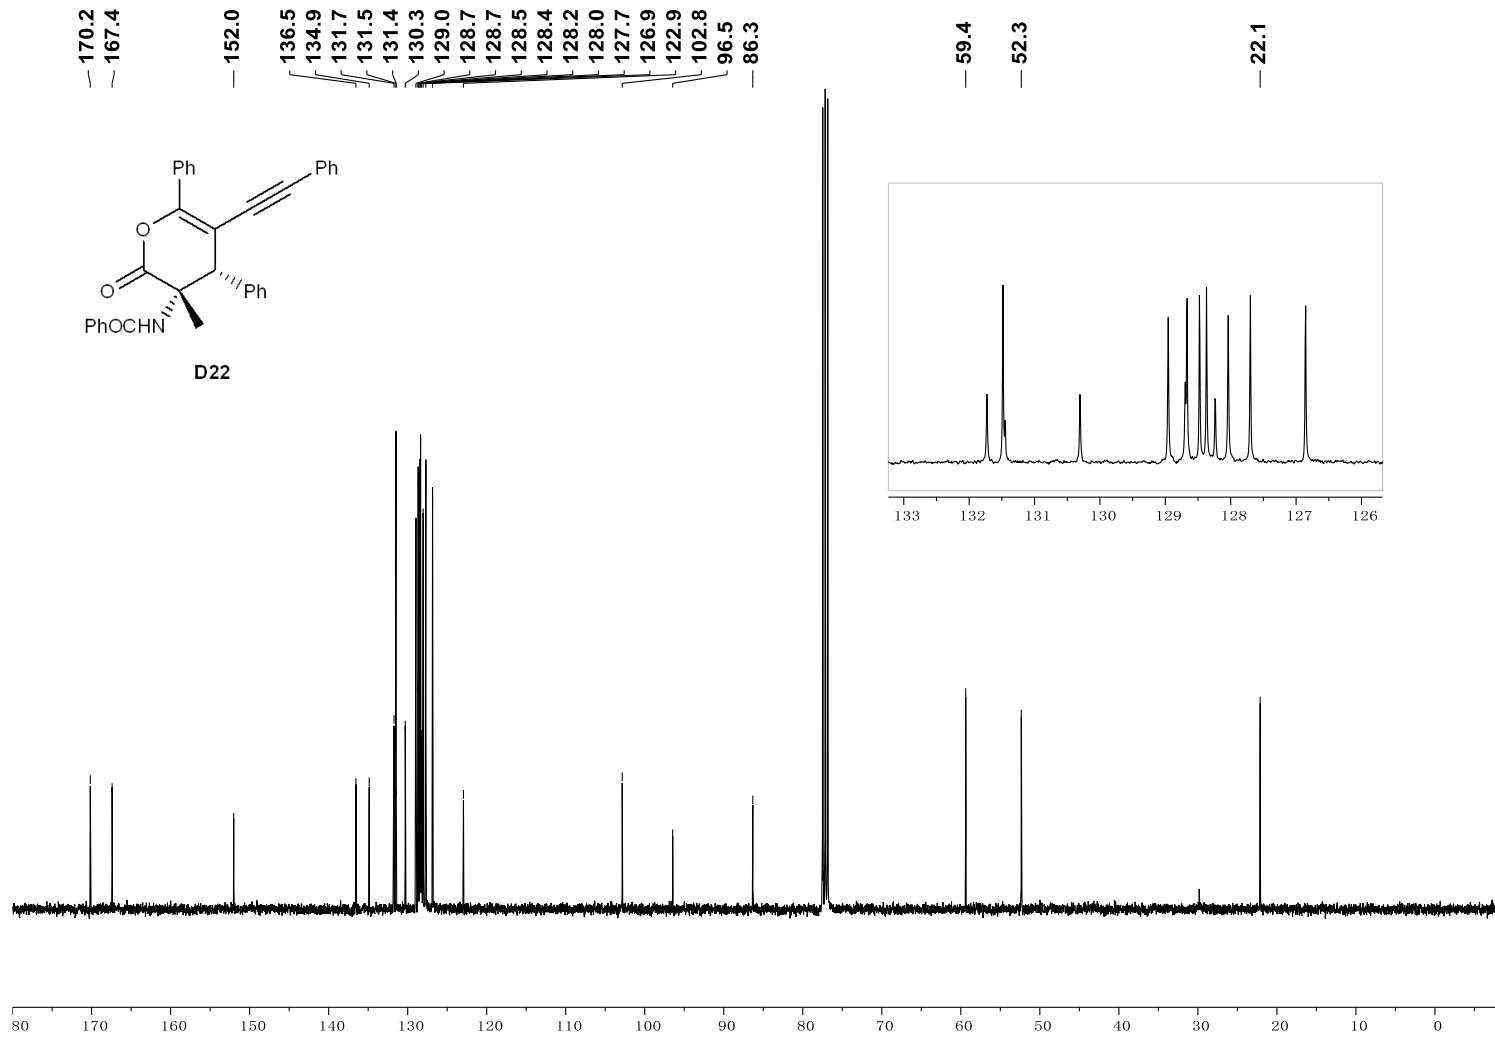

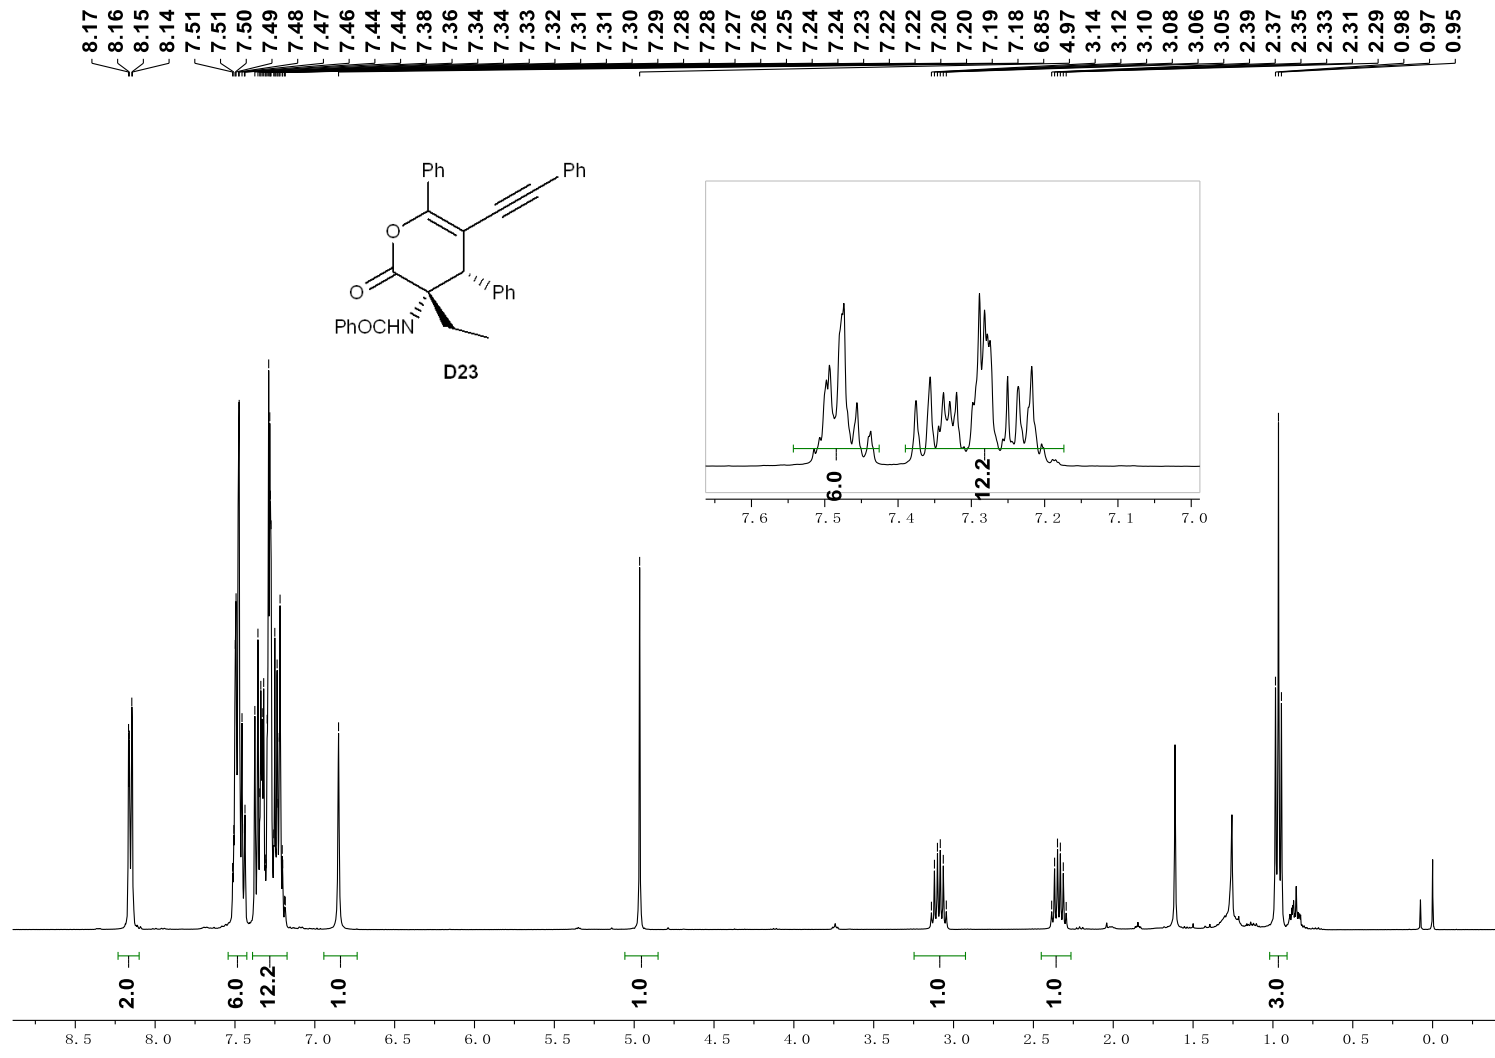



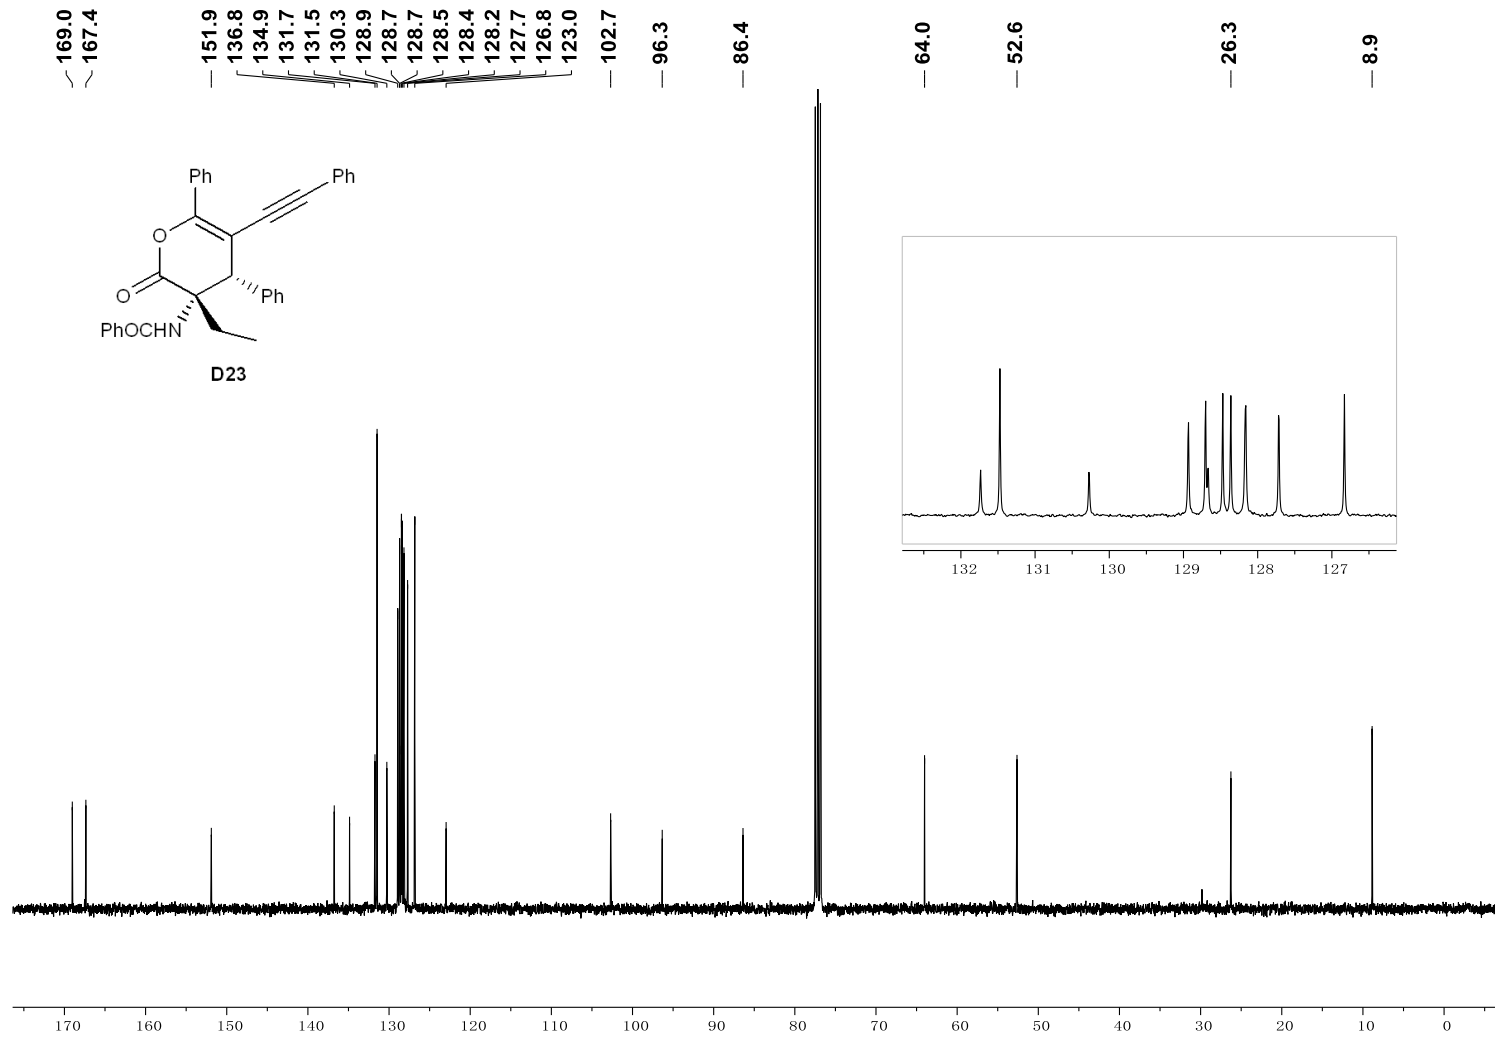

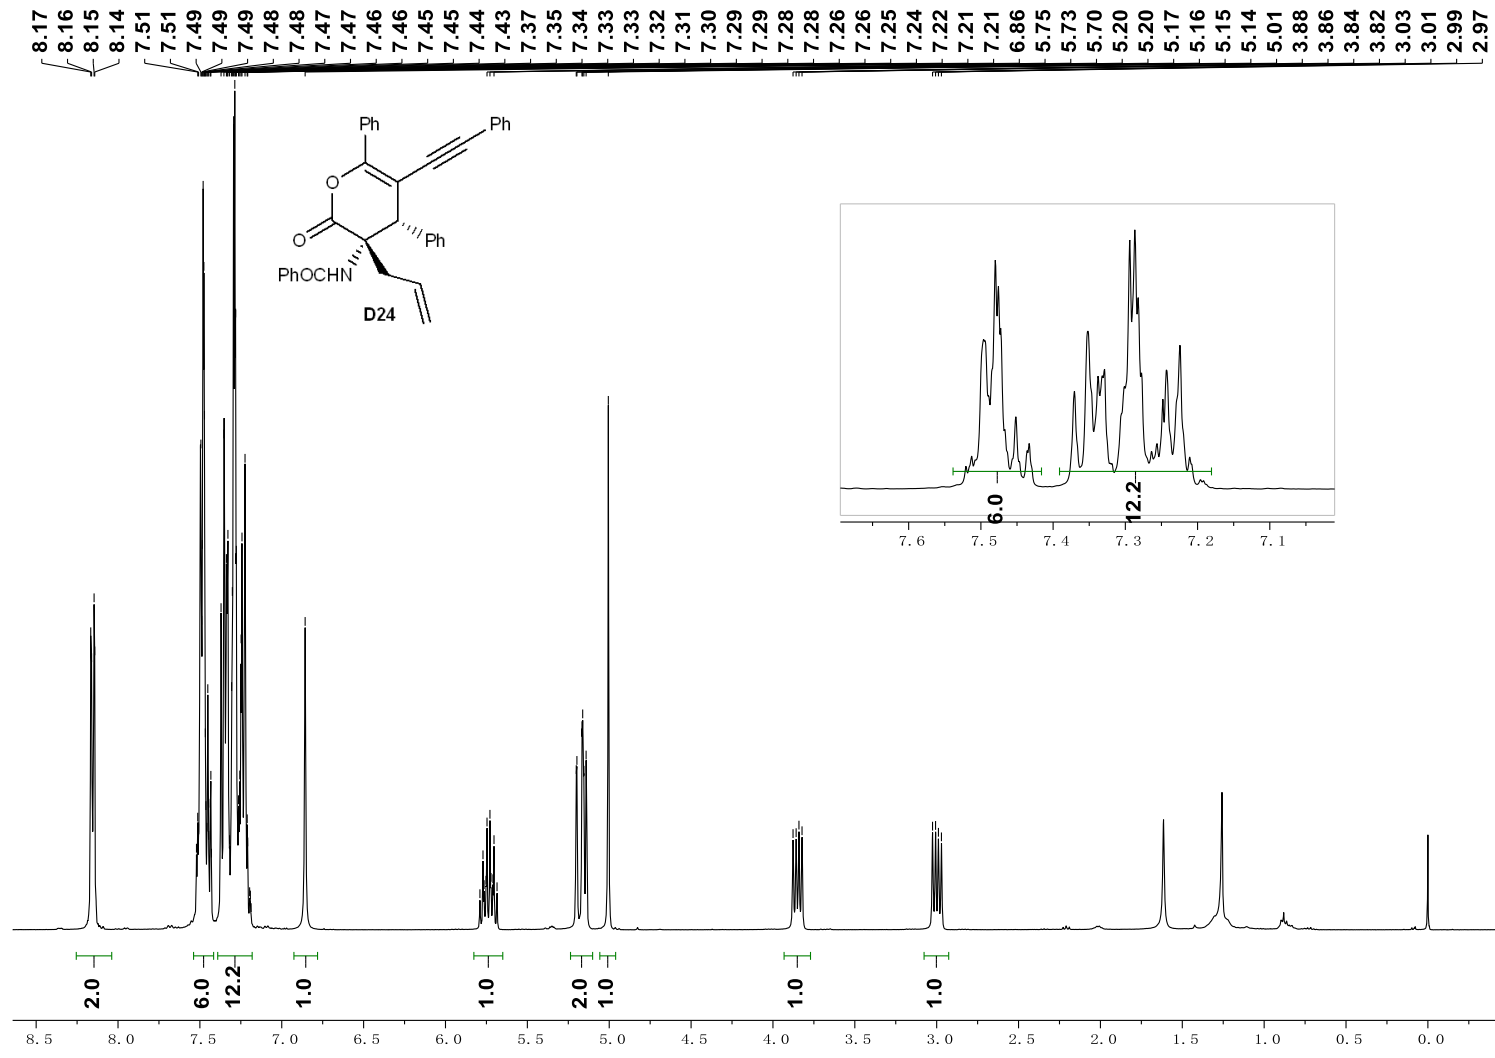

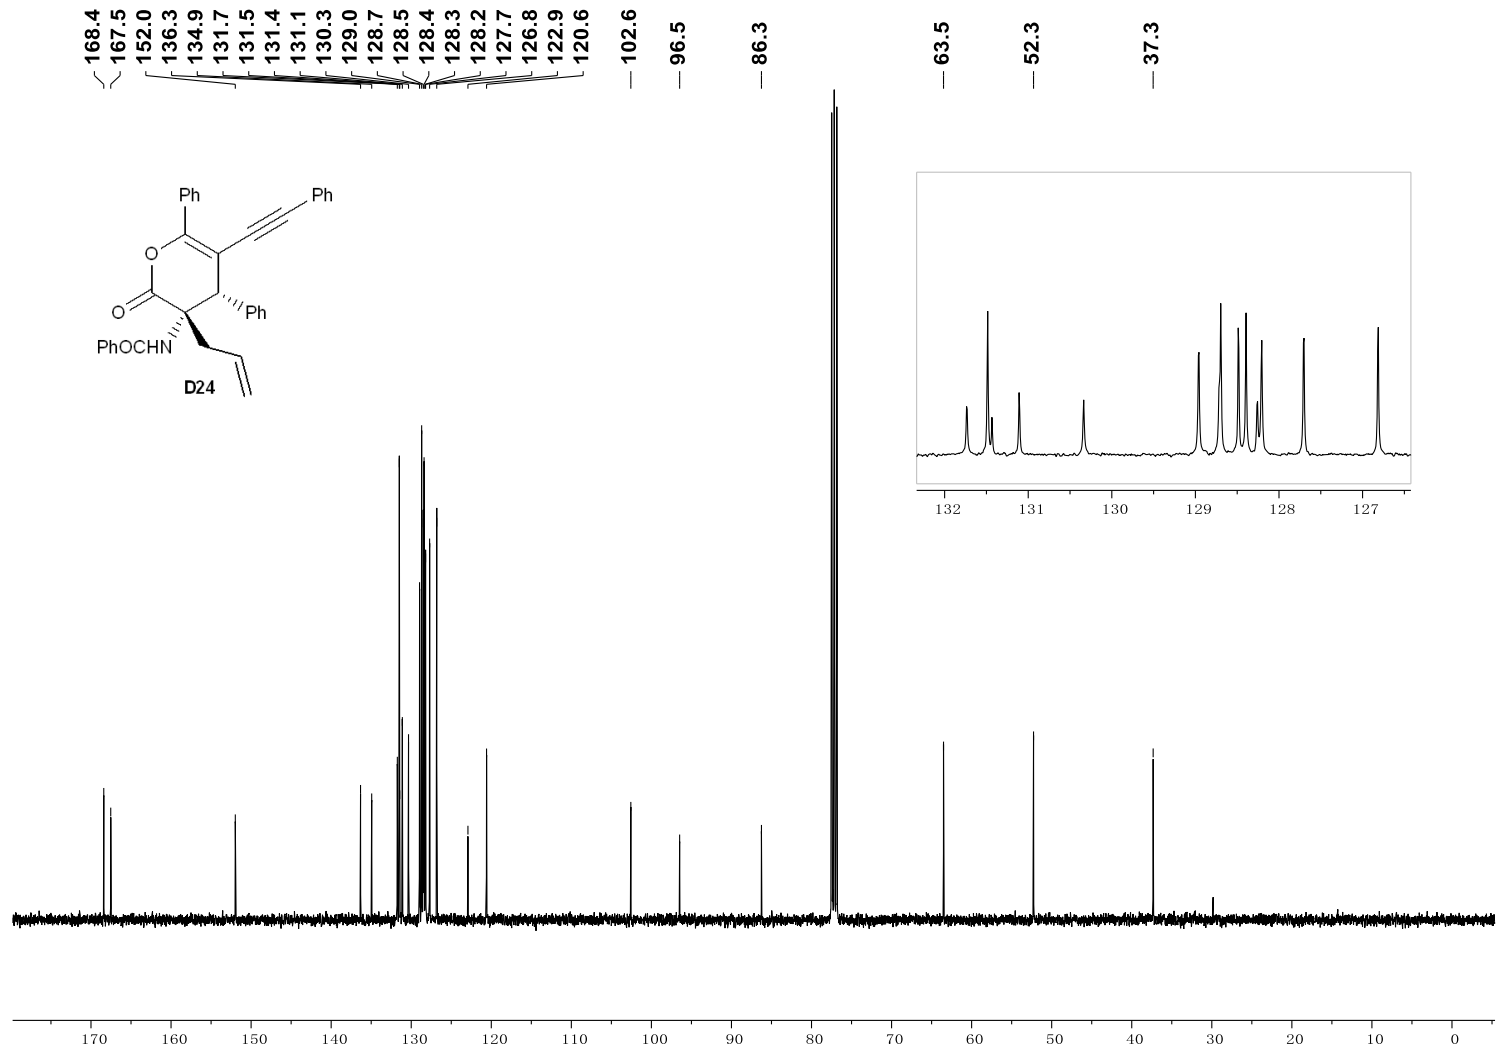

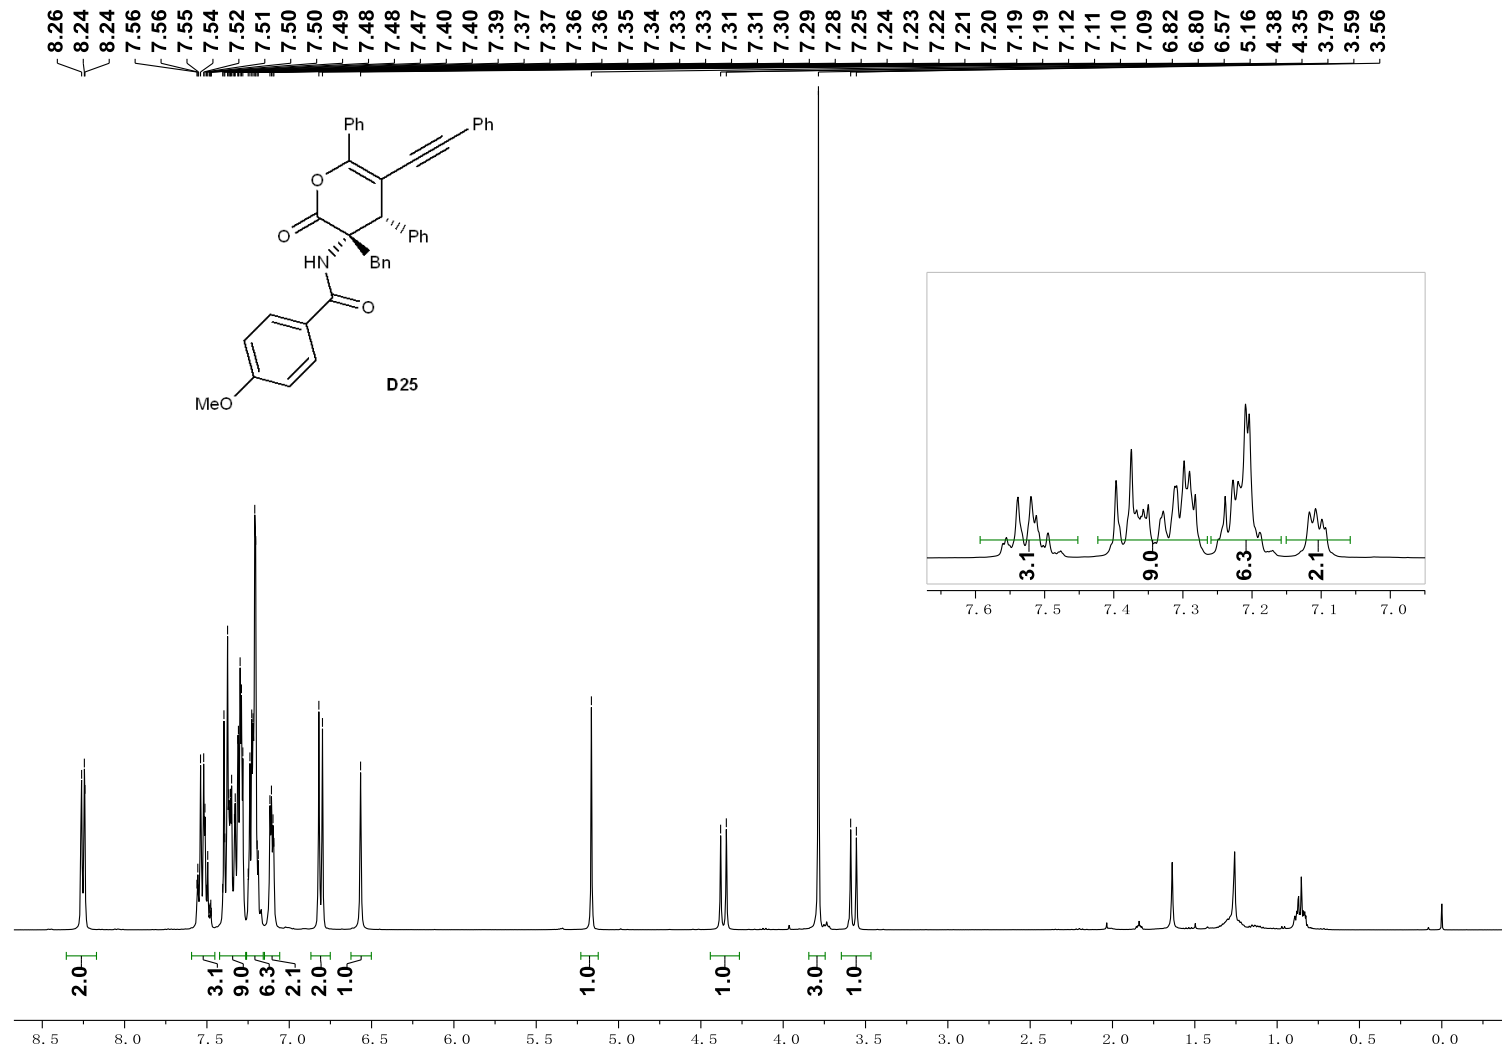

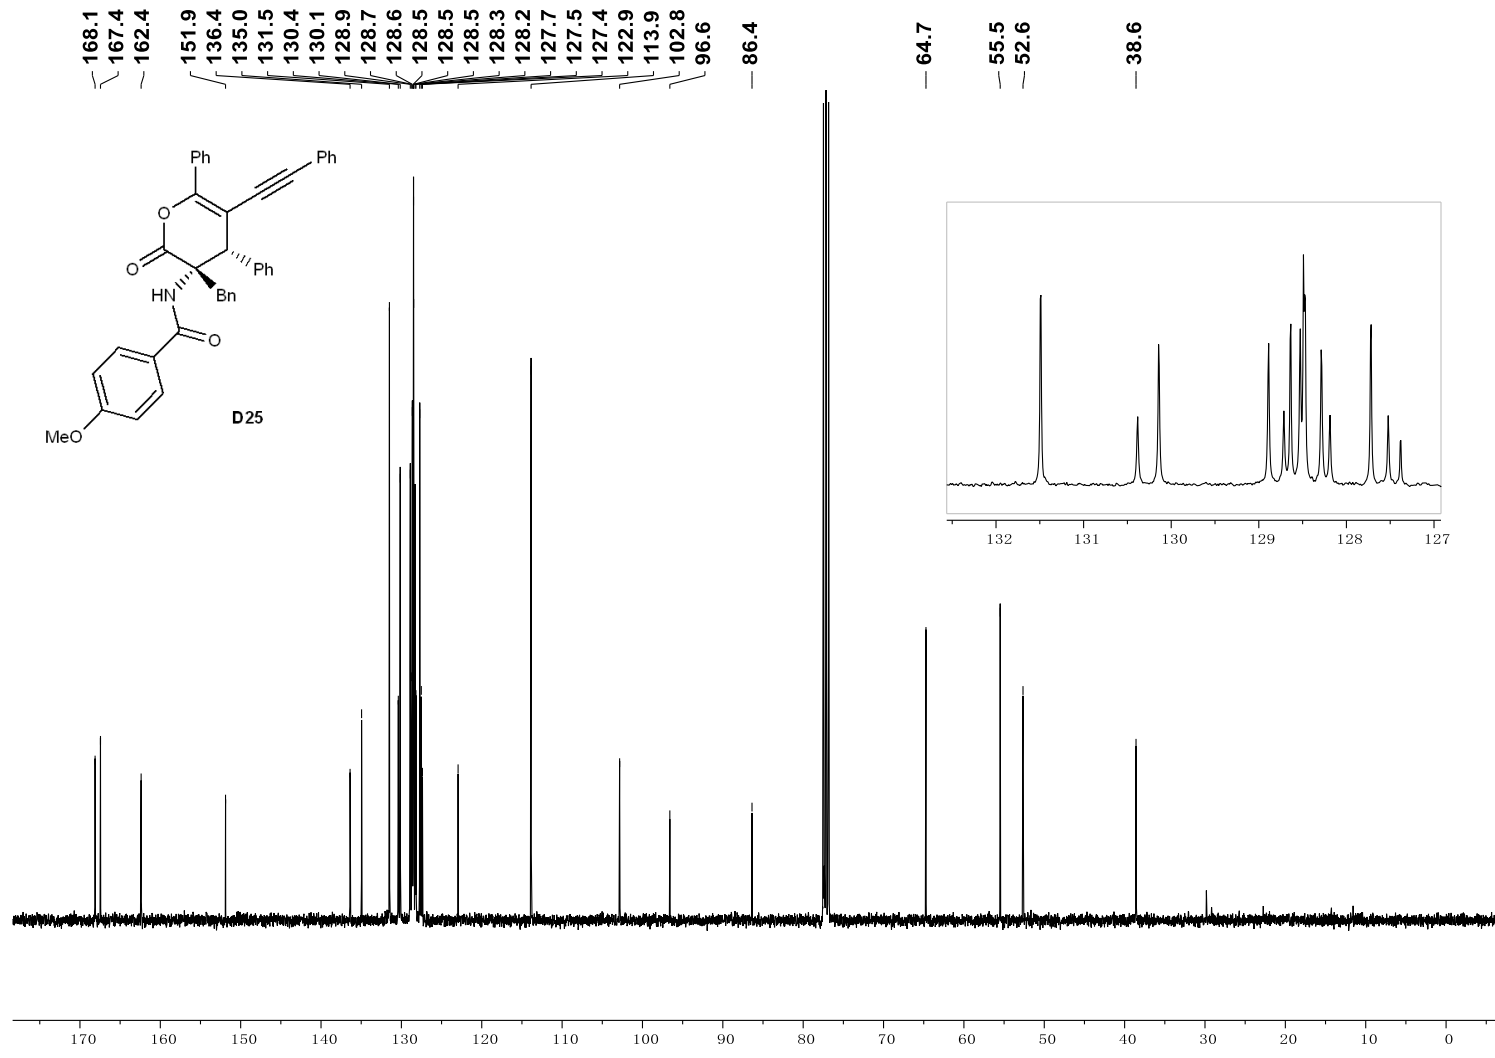

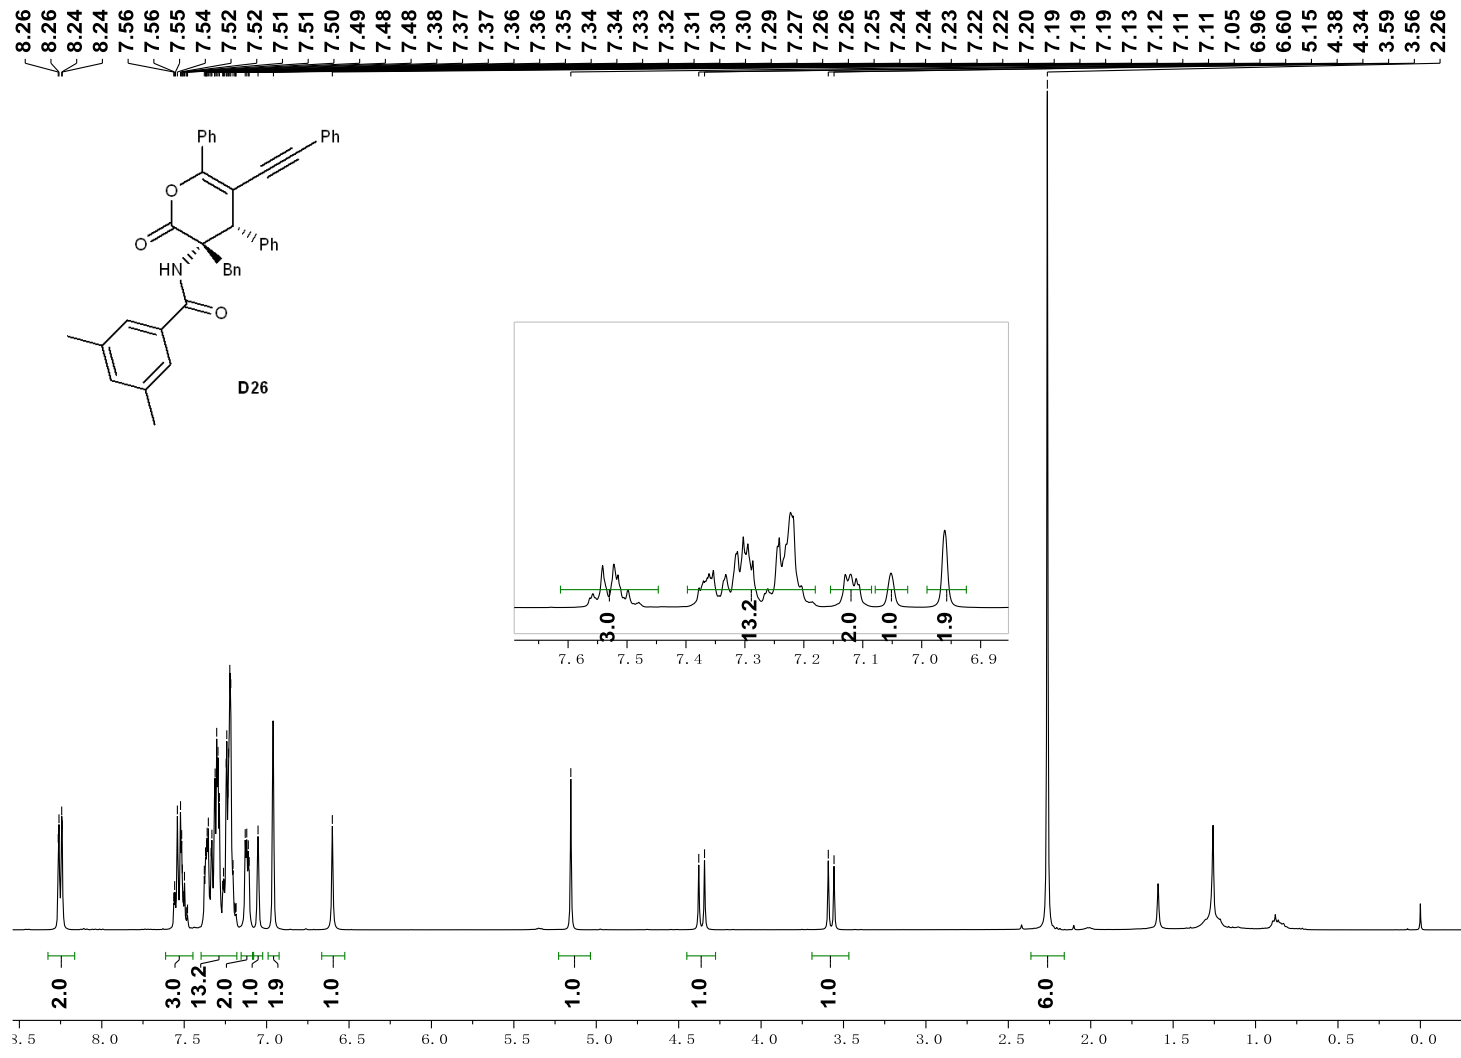

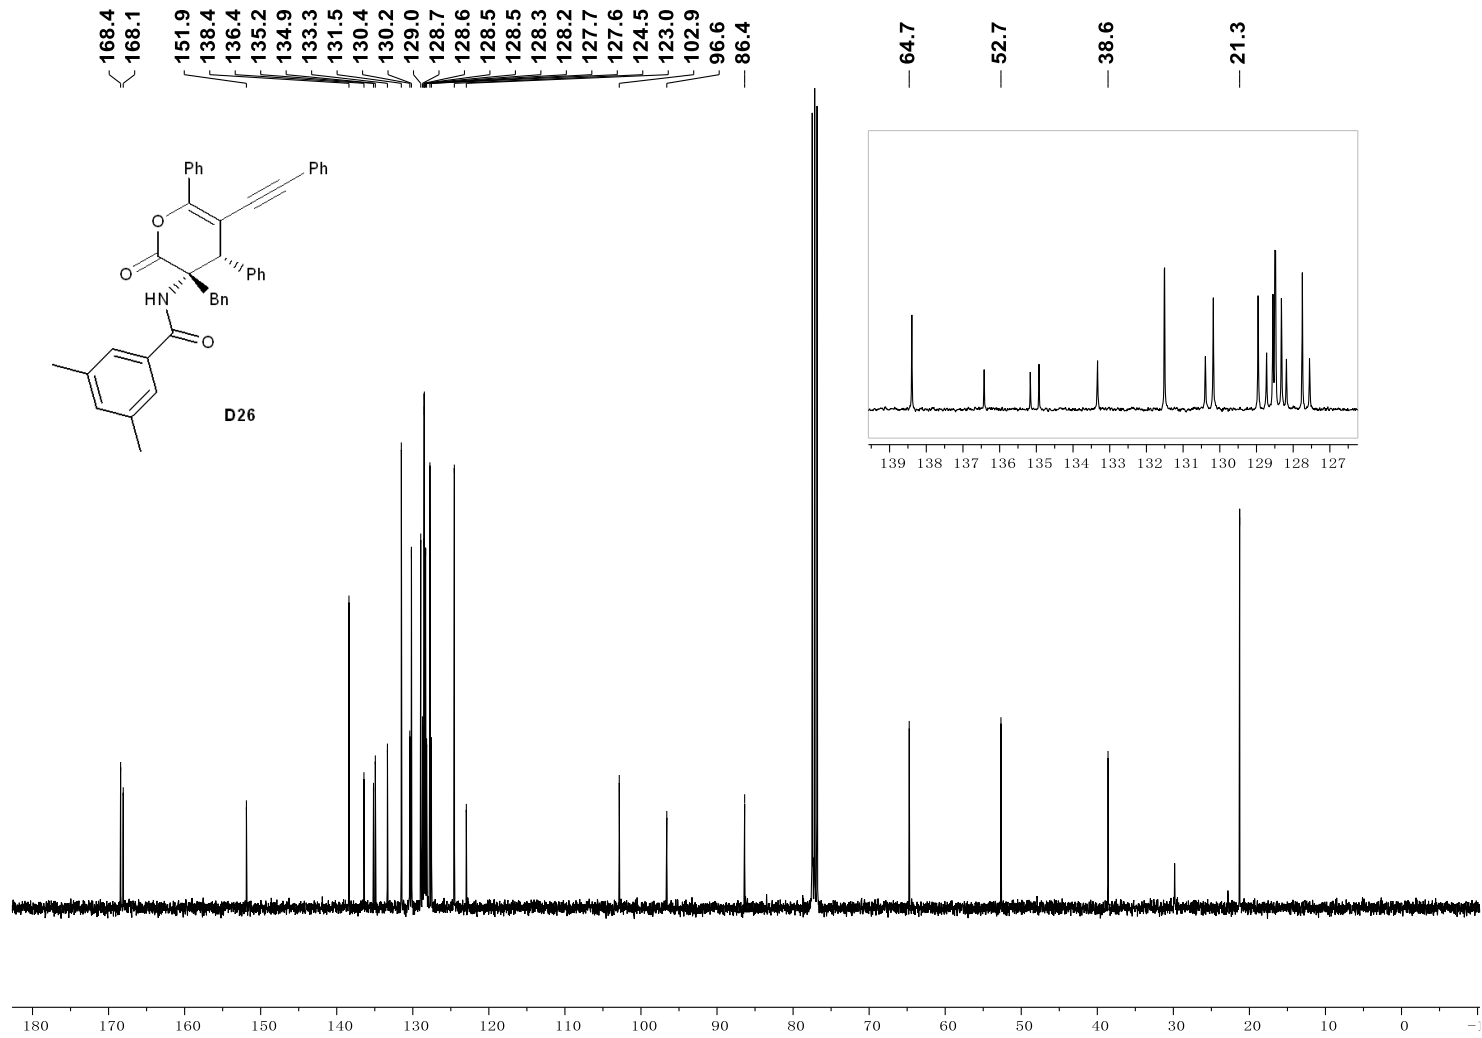

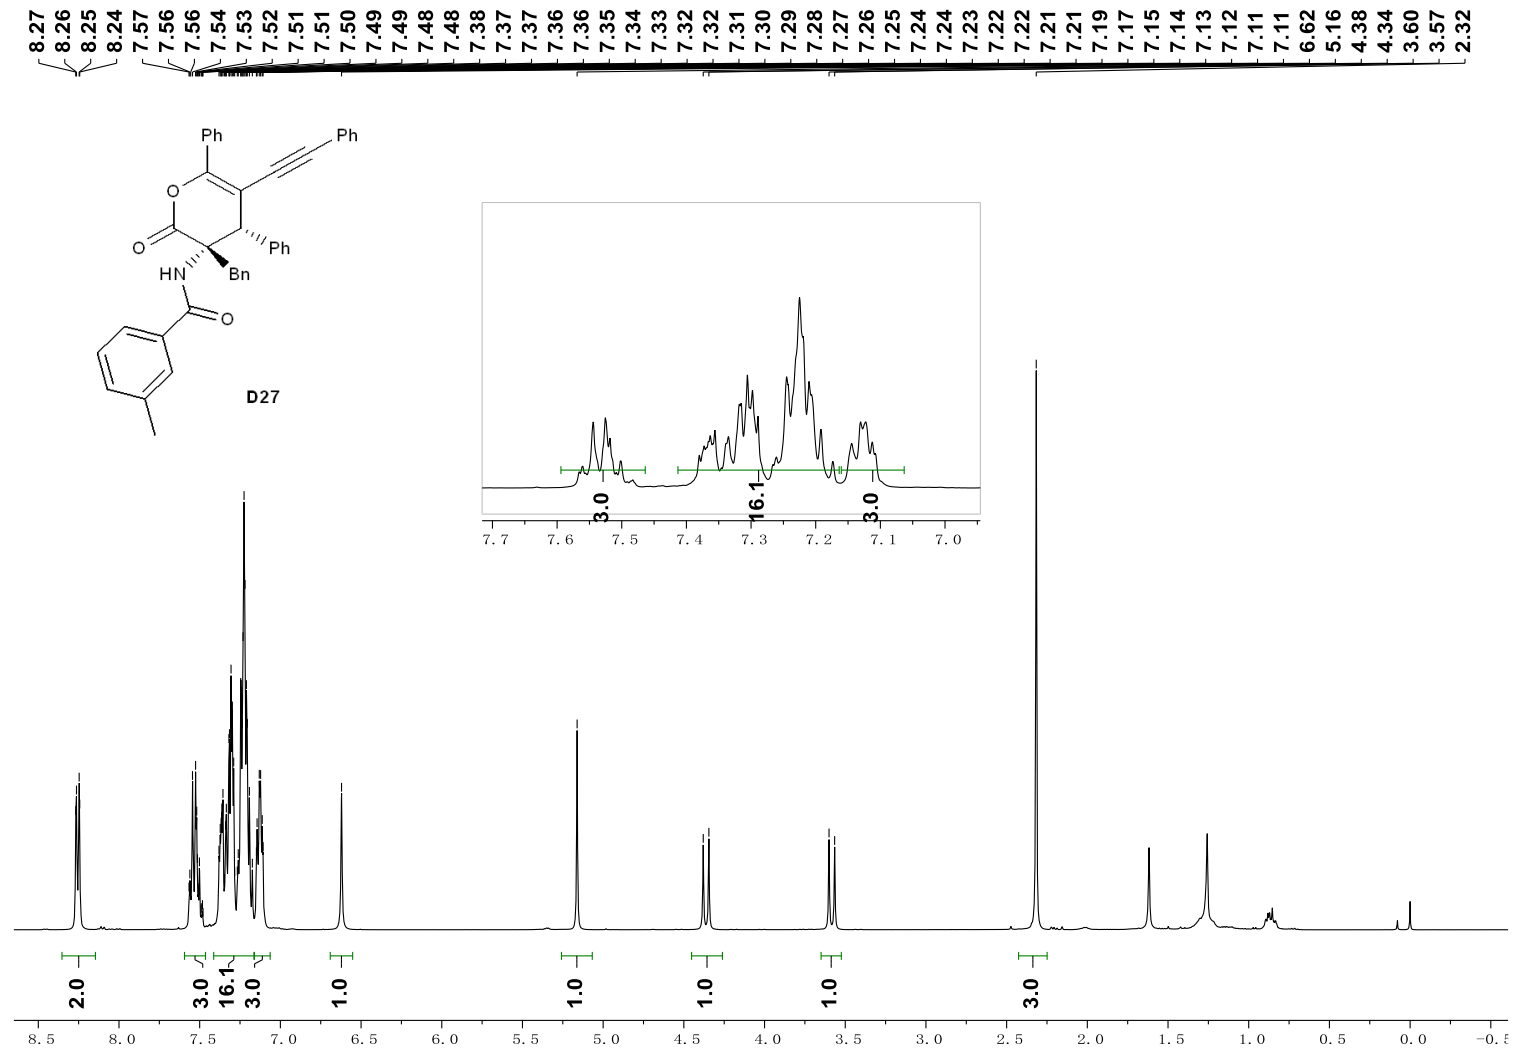



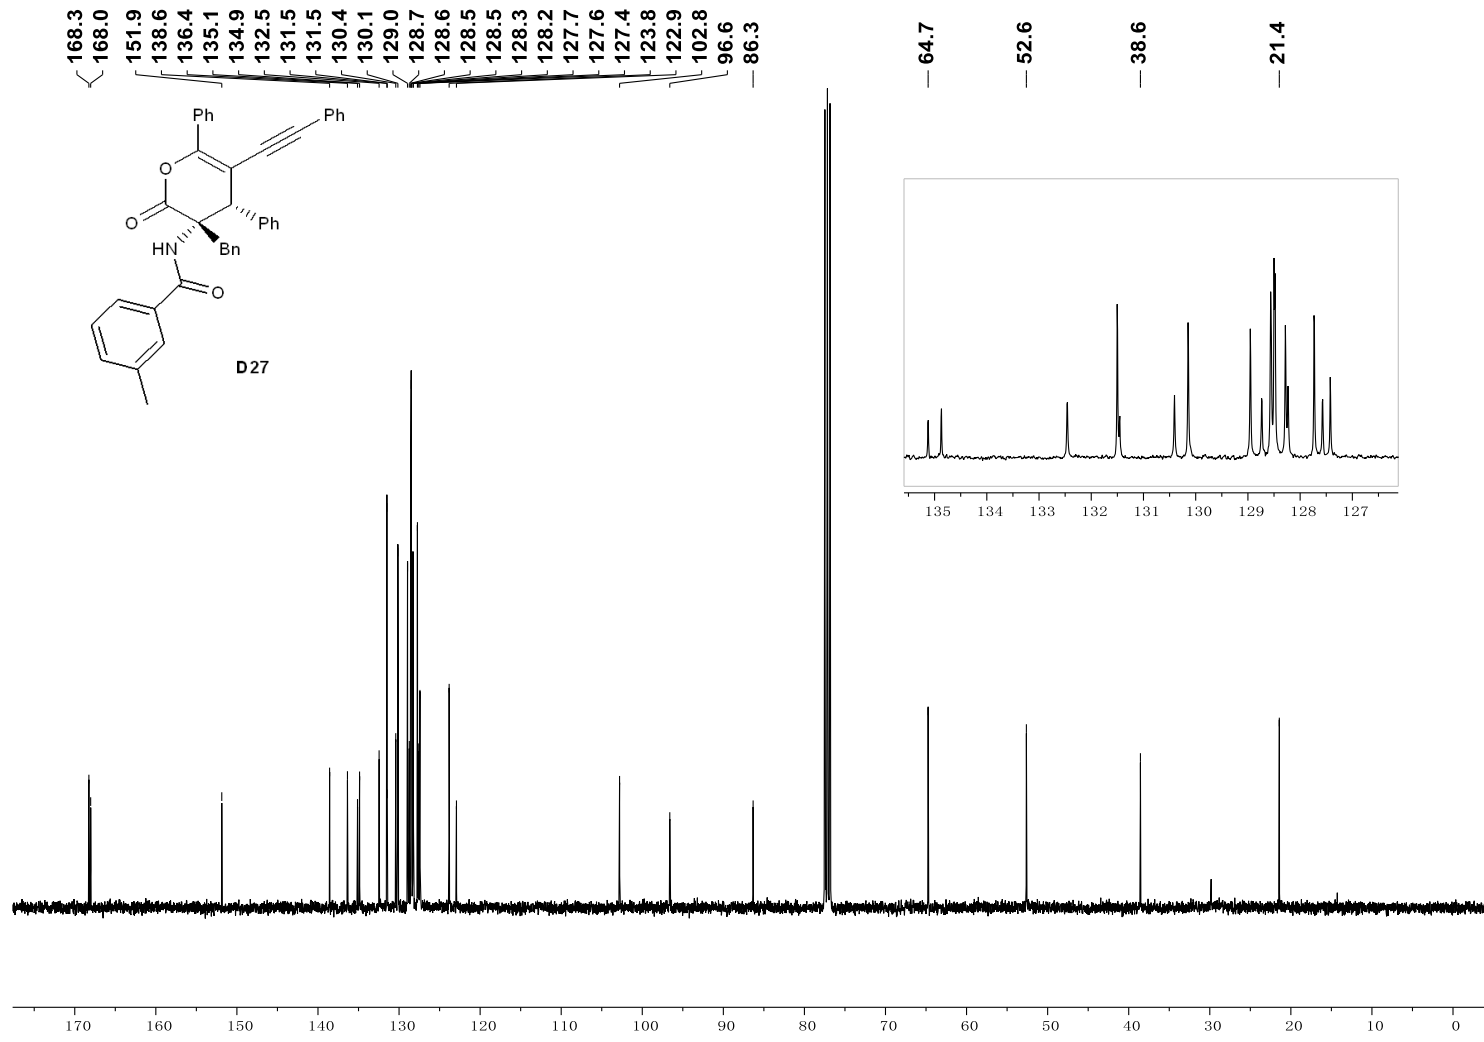

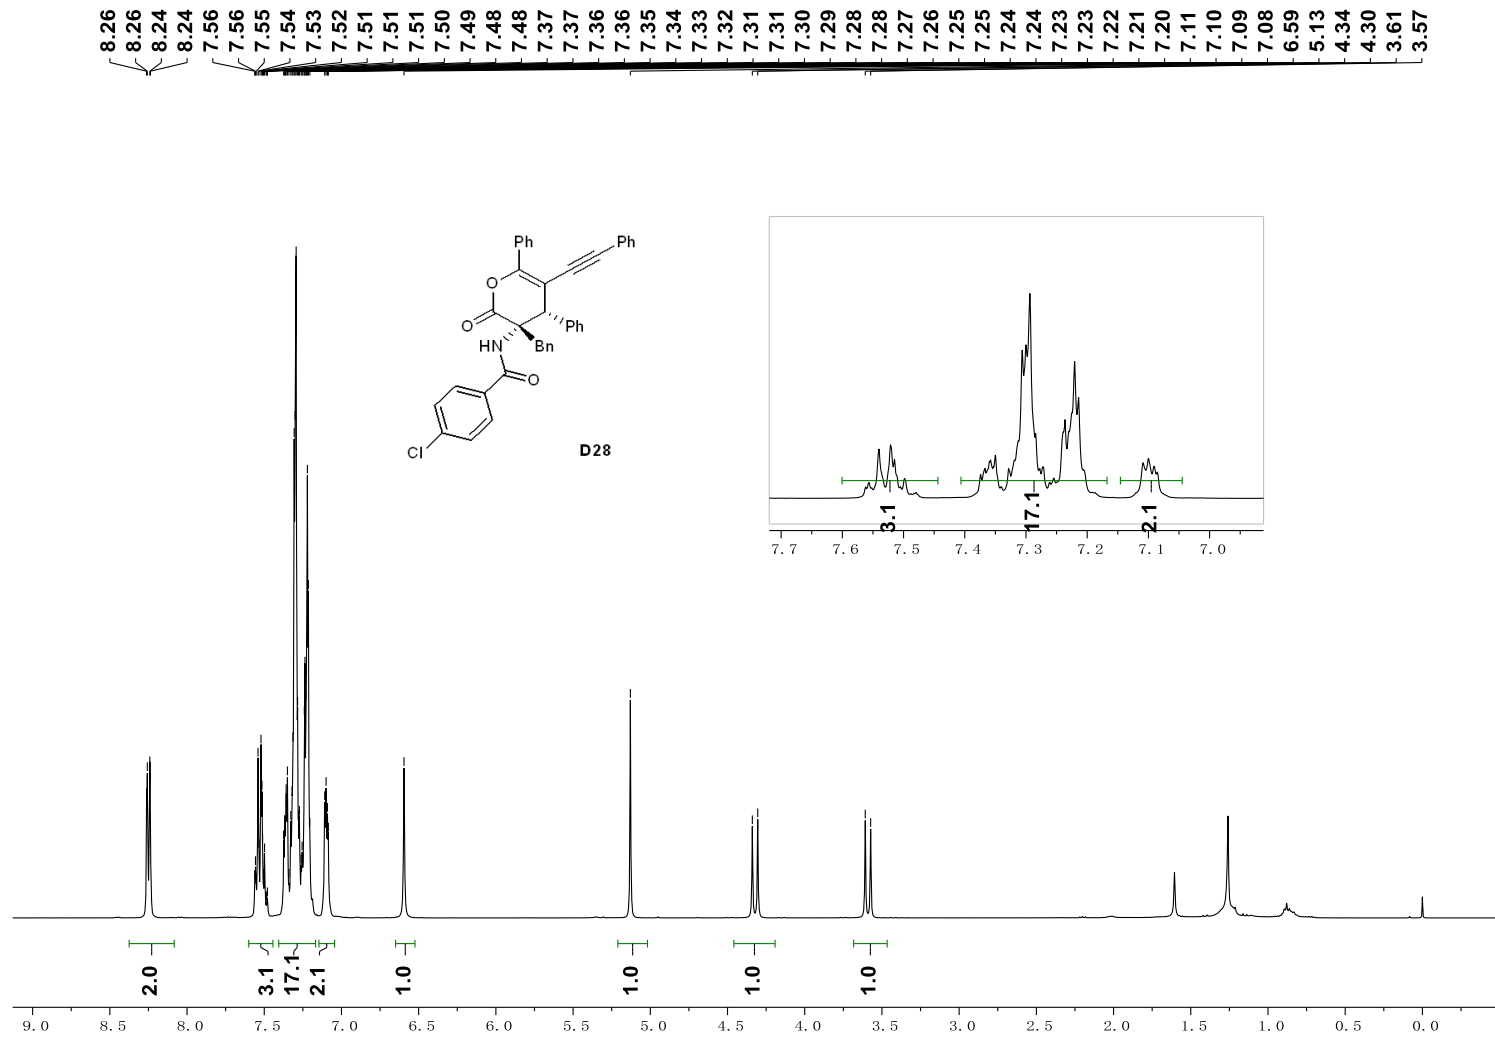

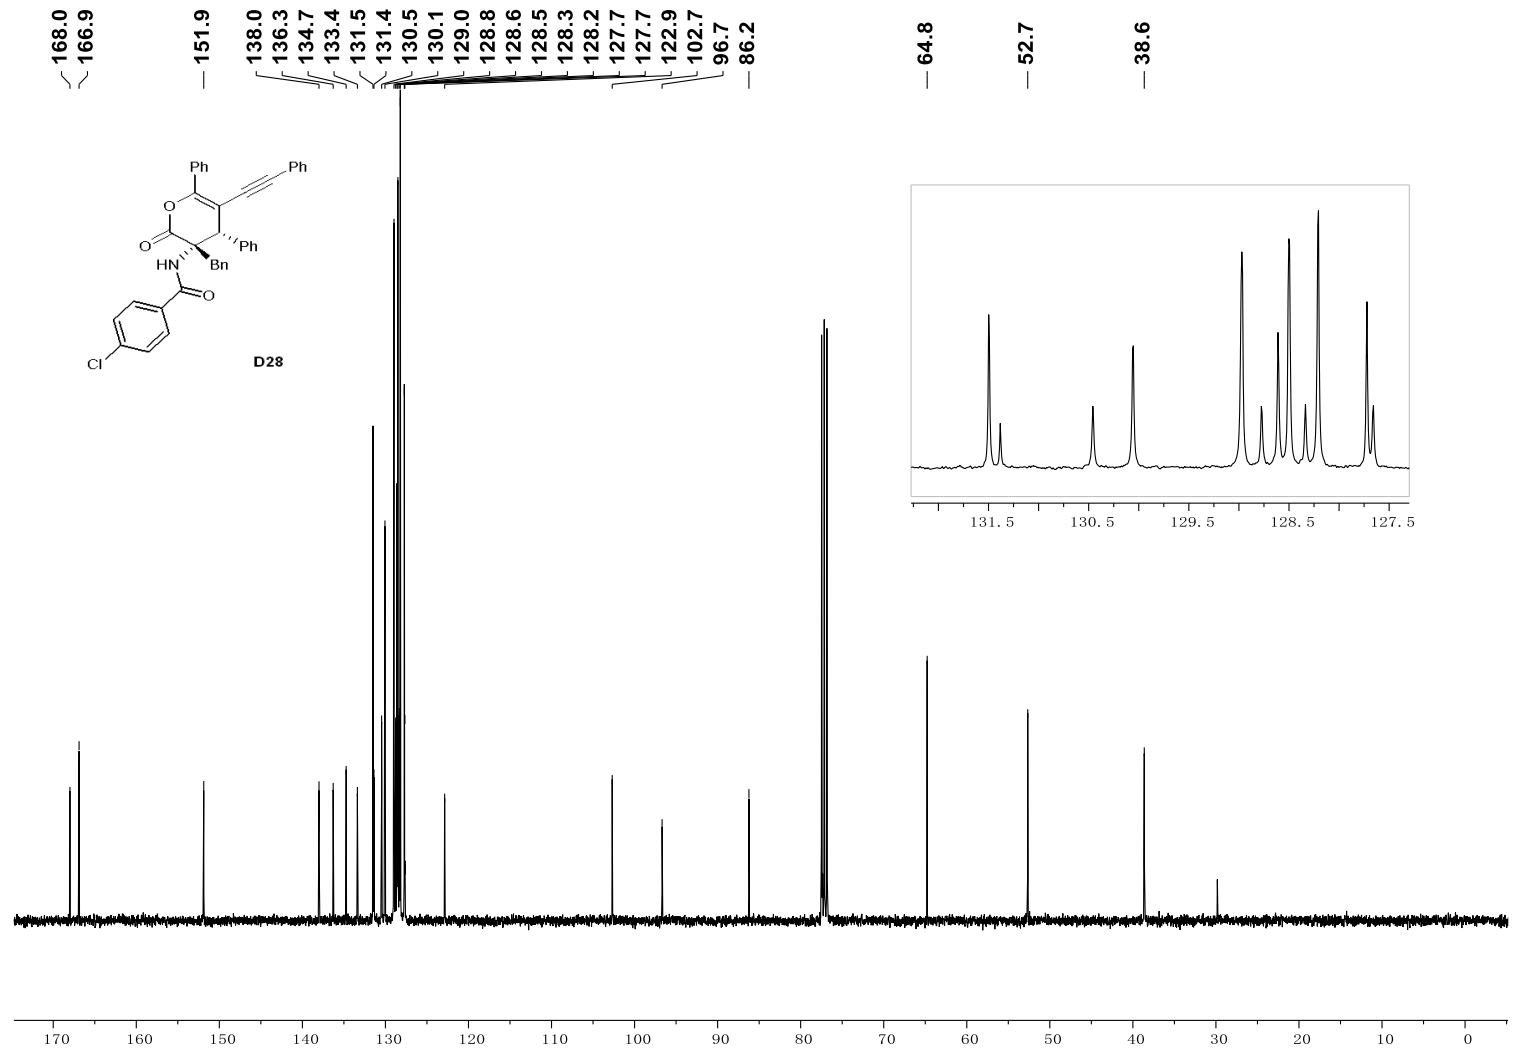

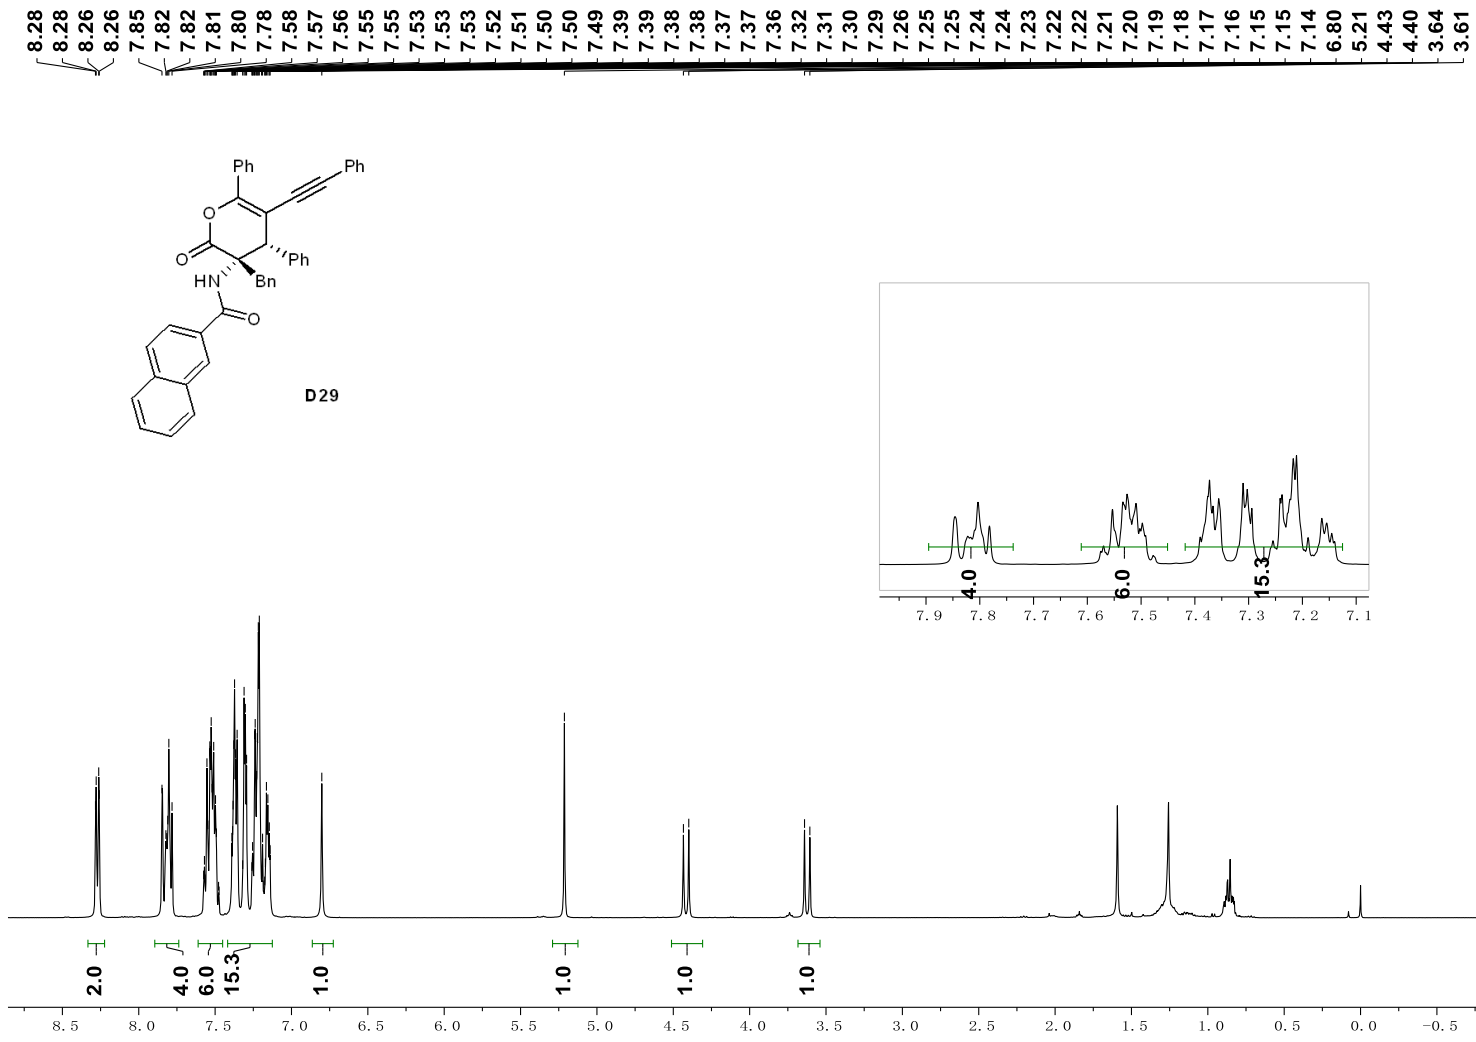

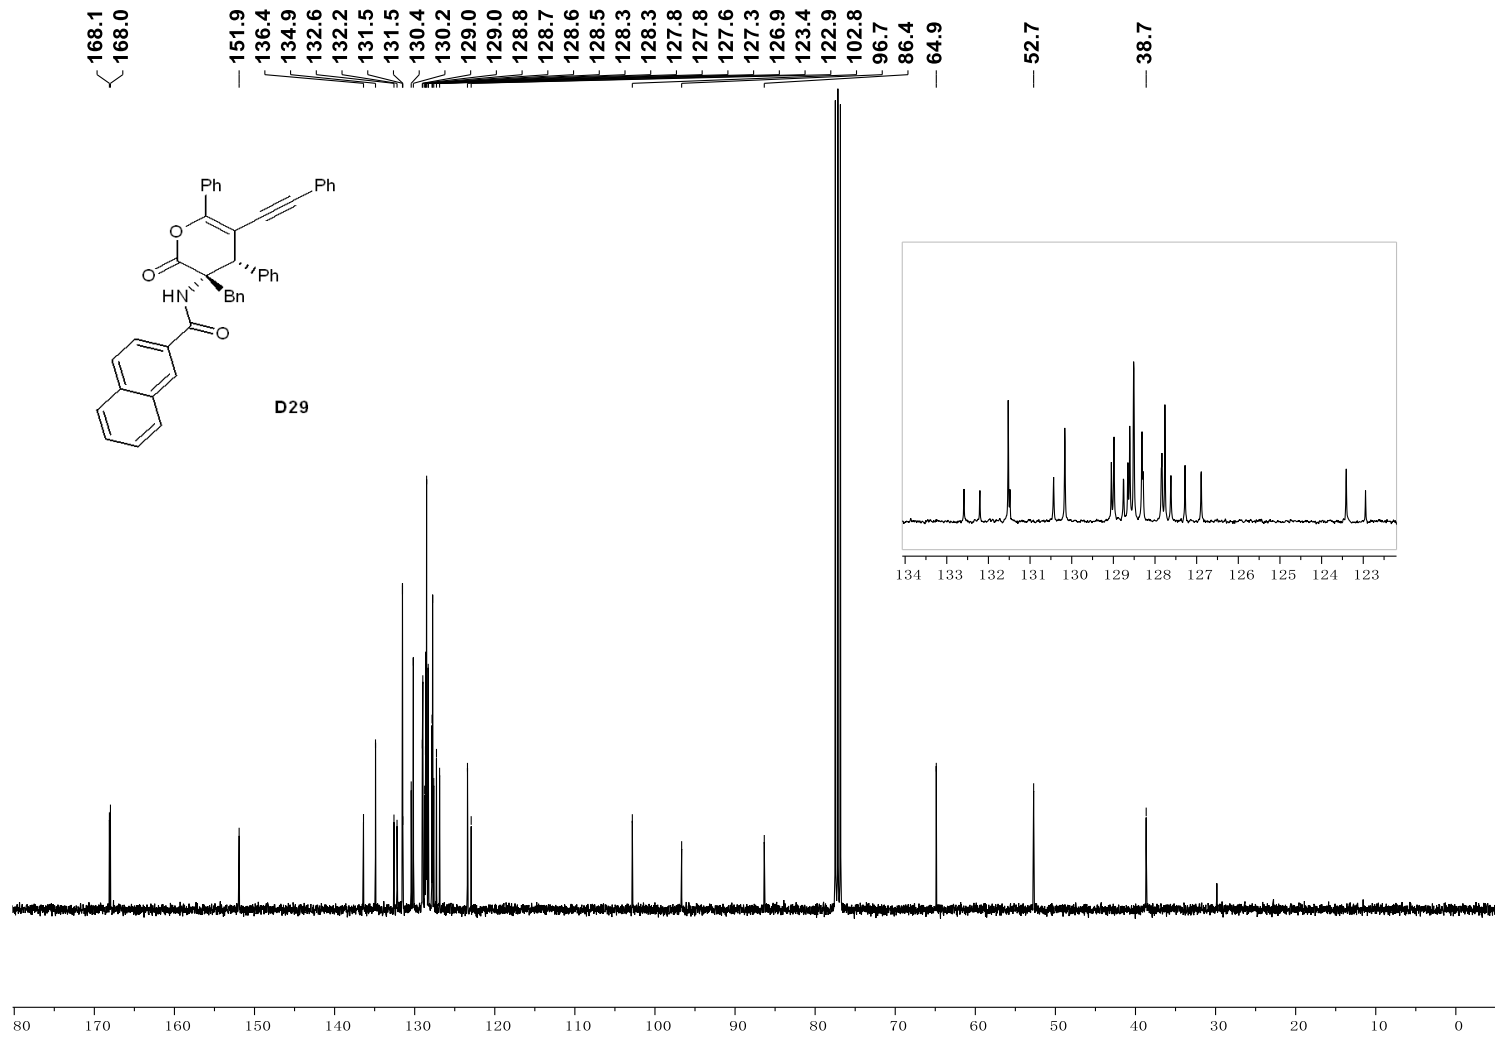

7.78  
7.76  
7.72  
7.70  
7.45  
7.39  
7.37  
7.35  
7.34  
7.32  
7.29  
7.27  
7.24  
7.19  
7.00  
6.90  
6.80  
6.75  
6.61

4.58  
4.45

3.59  
3.22  
3.02  
2.98  
2.60  
2.55  
2.53  
2.51  
2.48  
2.46  
2.02  
1.92  
1.85  
1.55  
1.53  
1.28  
1.27

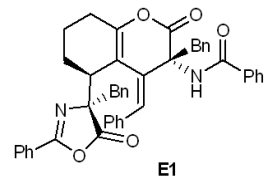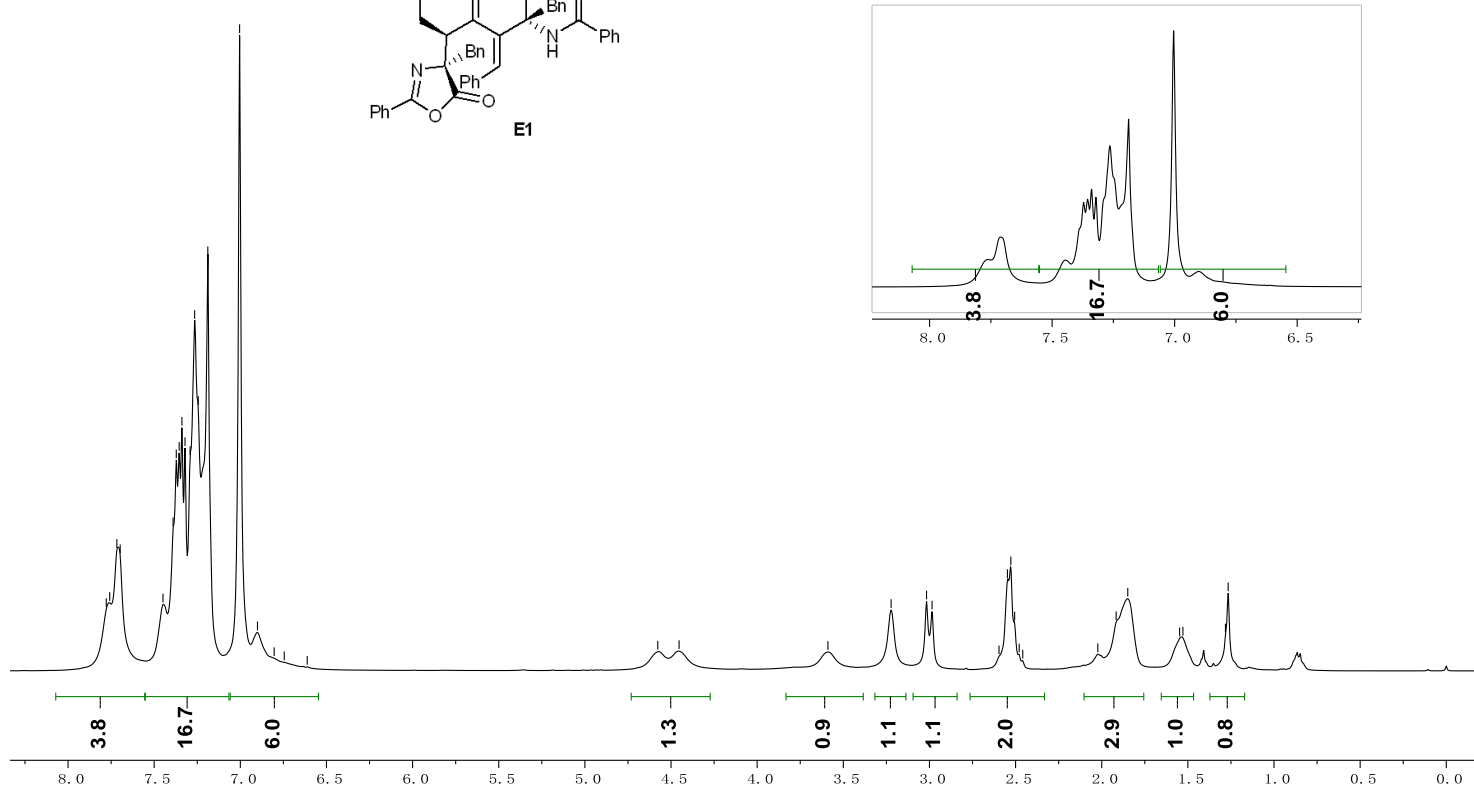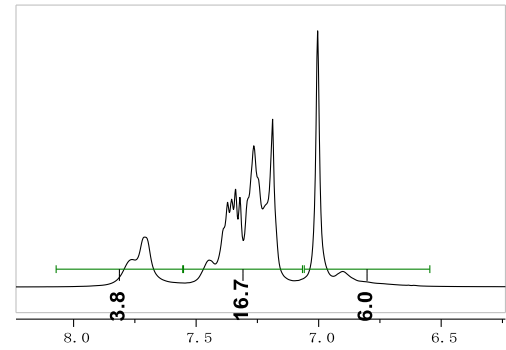

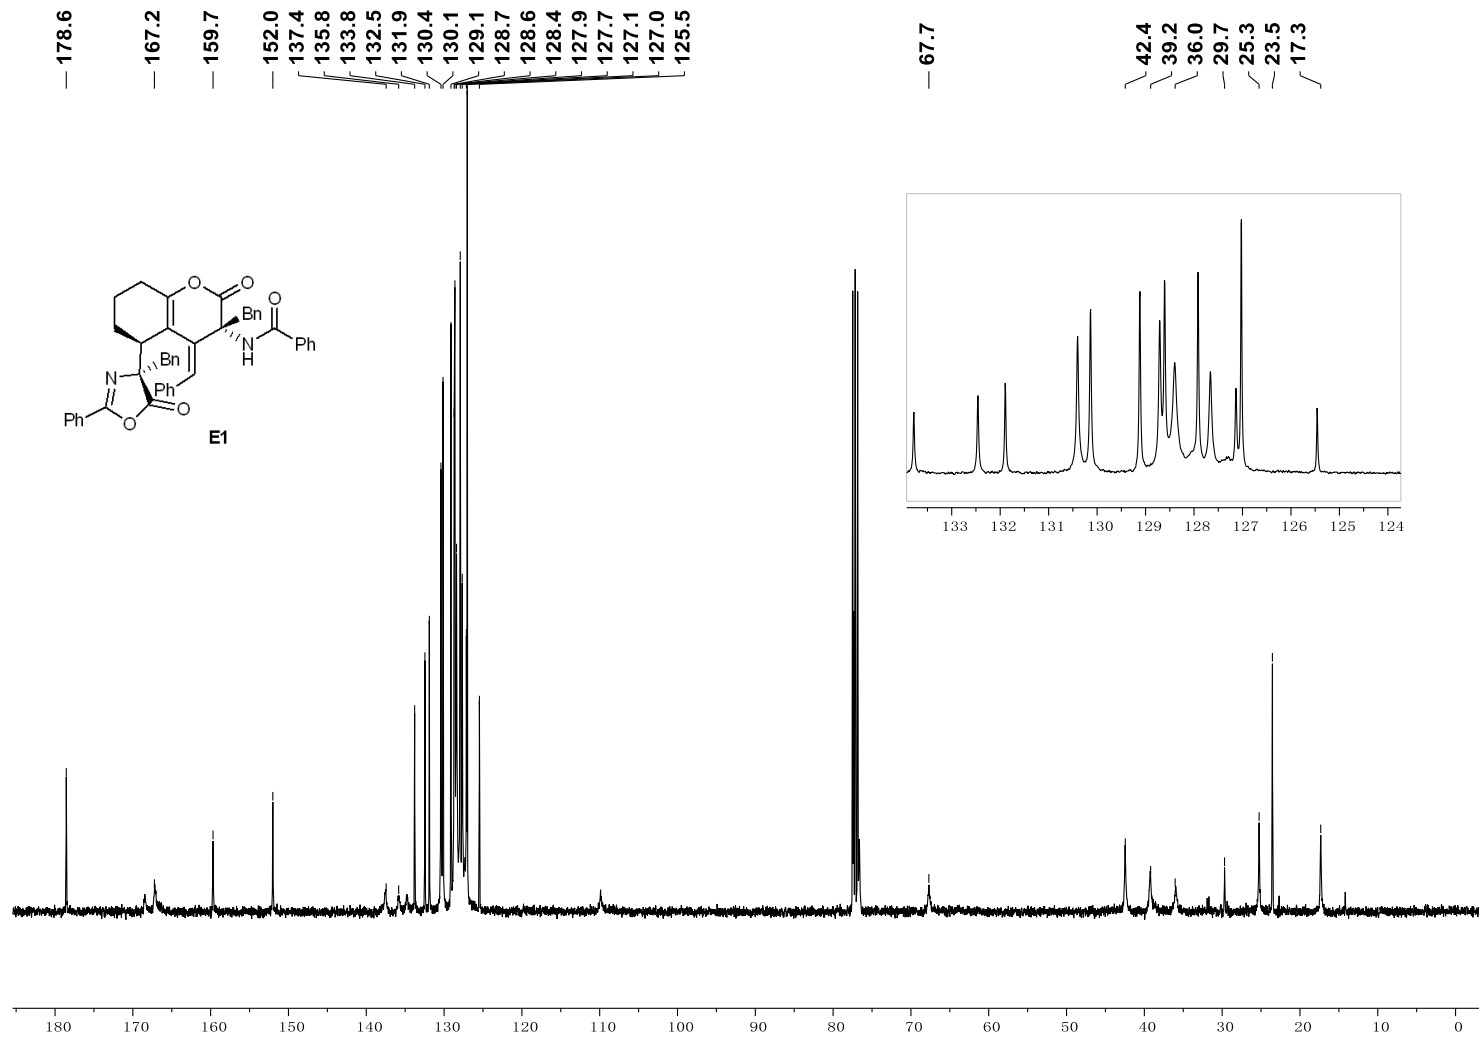





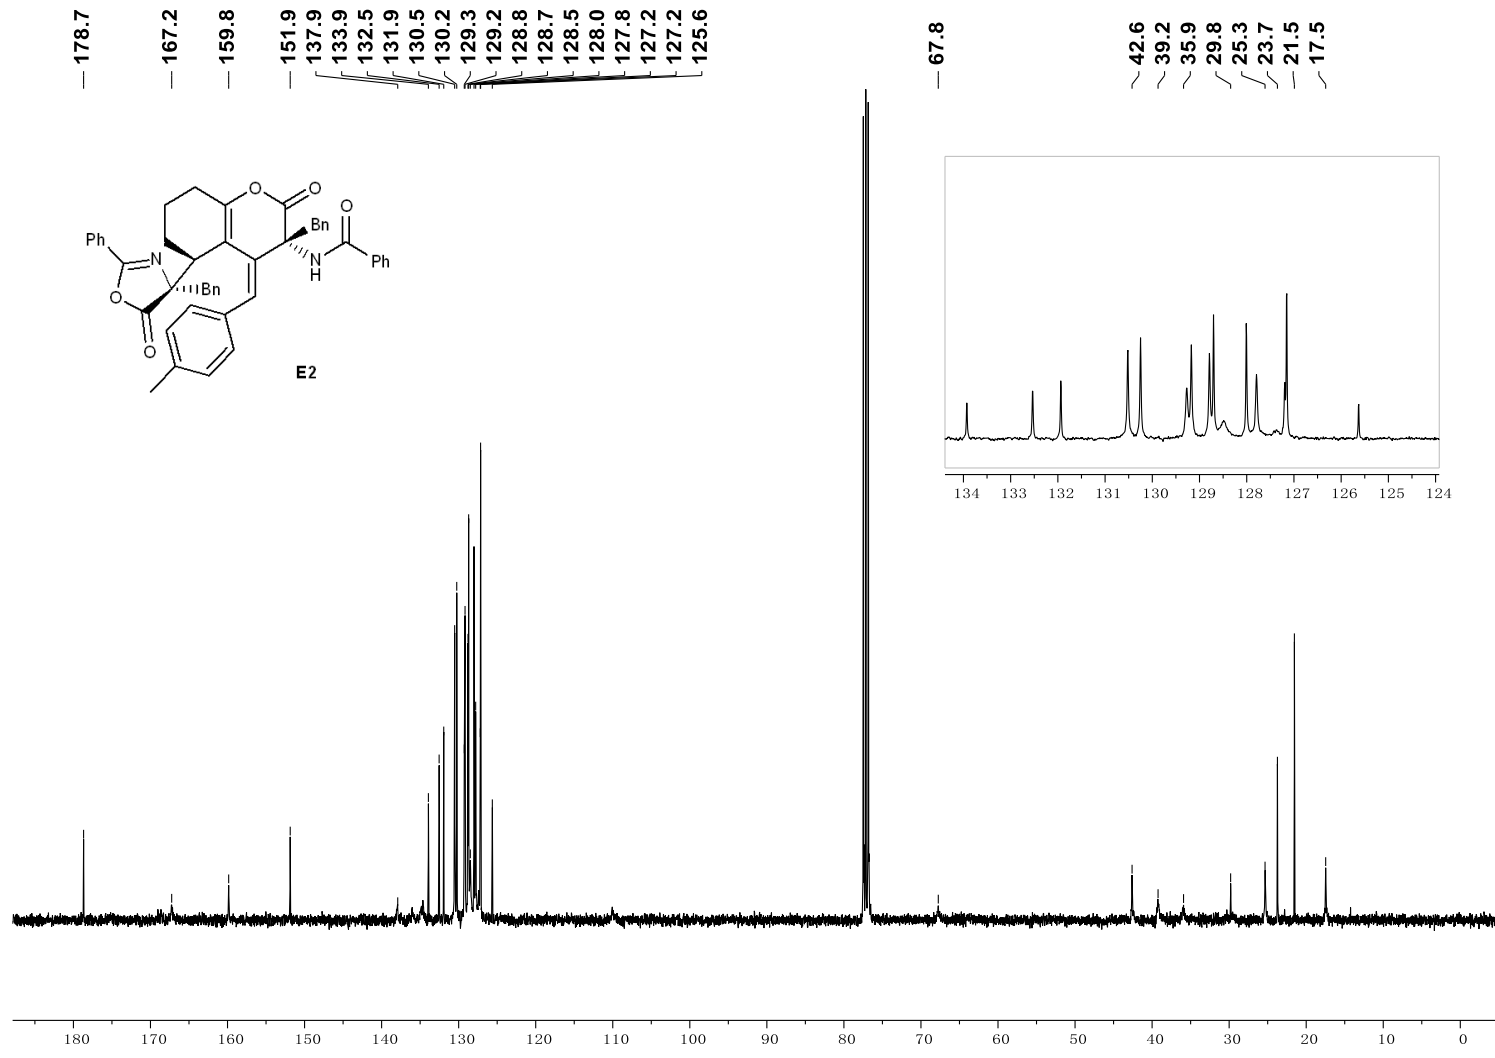

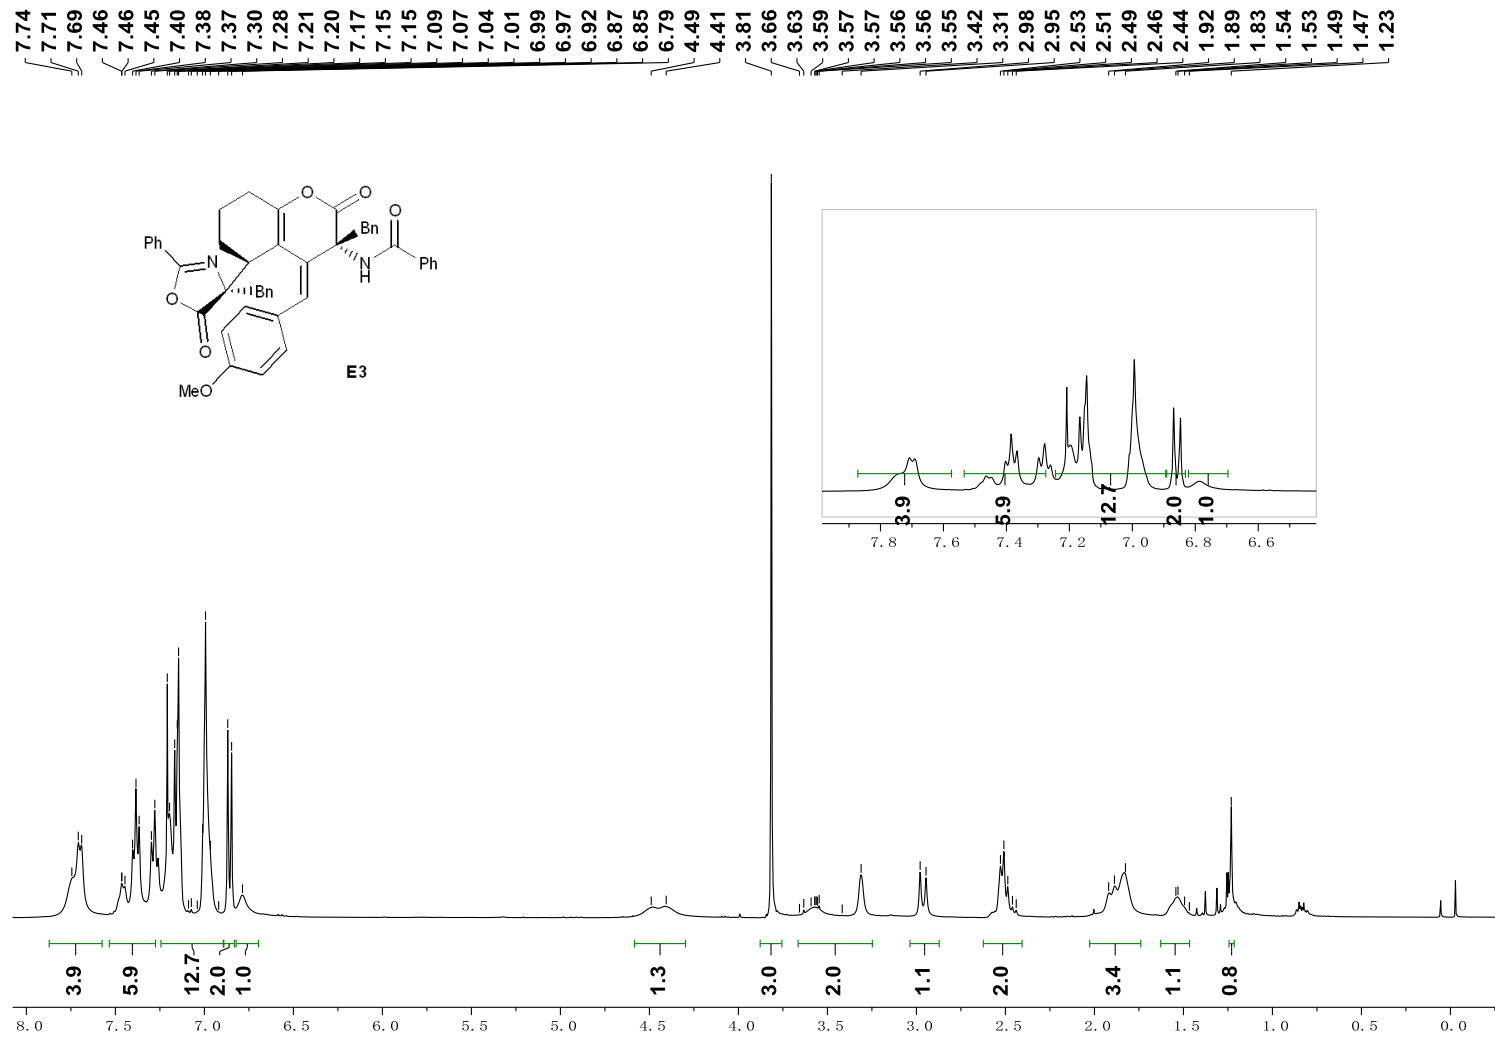

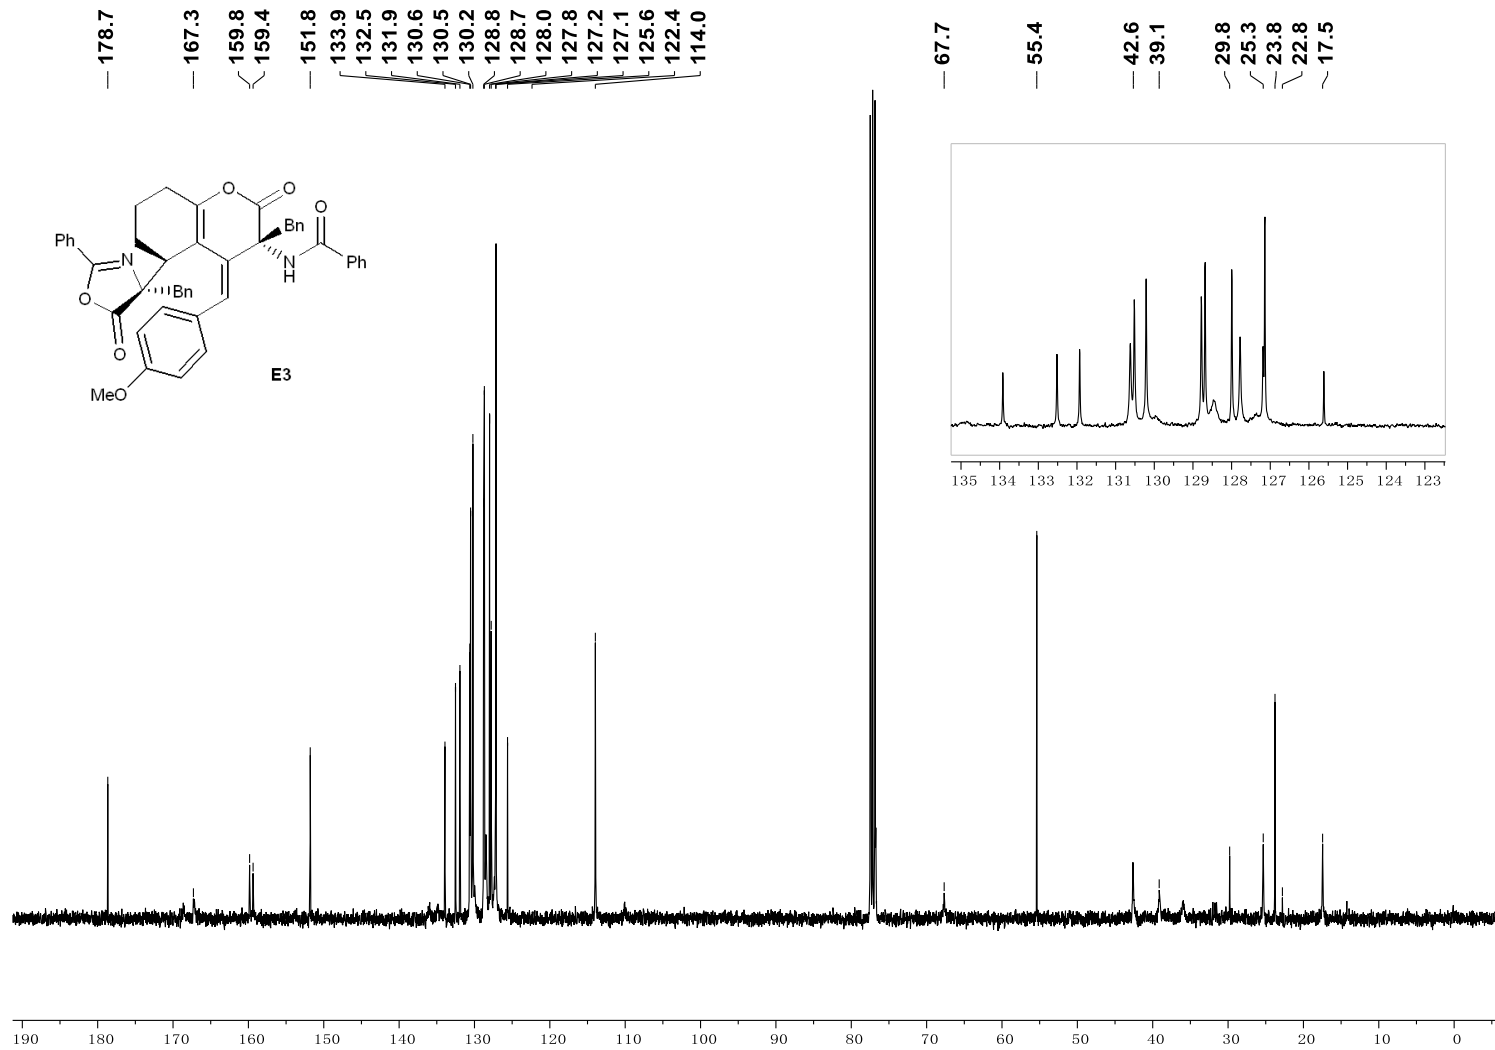

7.73  
7.50  
7.48  
7.44  
7.42  
7.40  
7.35  
7.33  
7.31  
7.31  
7.29  
7.24  
7.16  
7.15  
7.05  
7.04  
7.03  
7.01  
6.99  
6.82

4.53  
4.39

3.54  
3.17  
3.02  
2.99  
2.56  
2.54  
2.52  
2.50  
2.48  
1.97  
1.94  
1.88  
1.55  
1.26

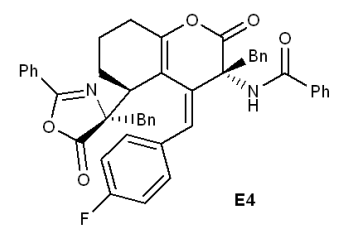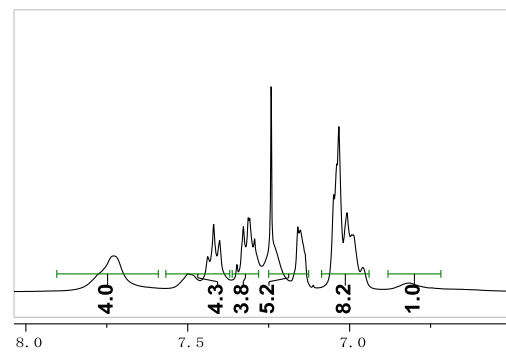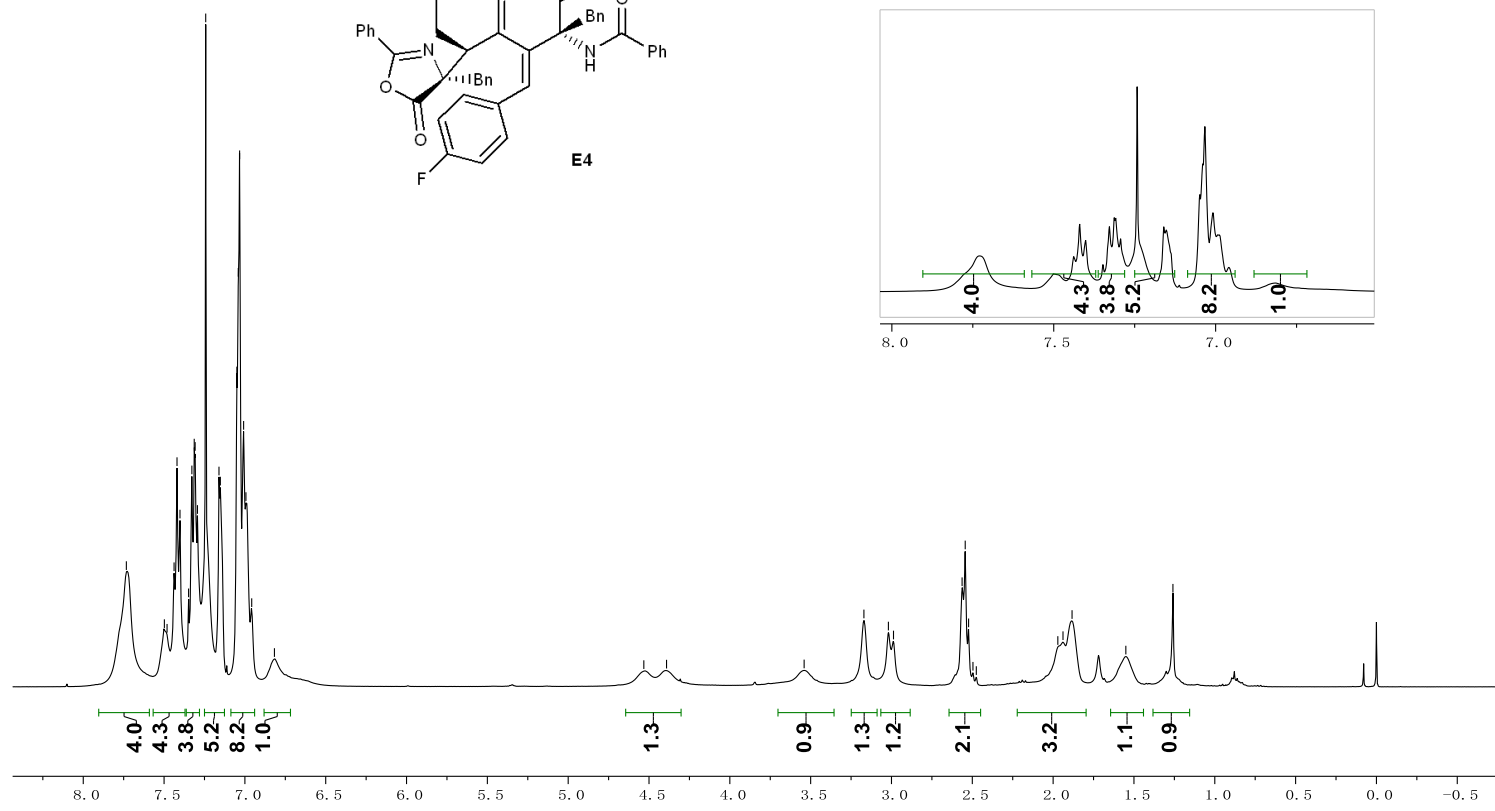

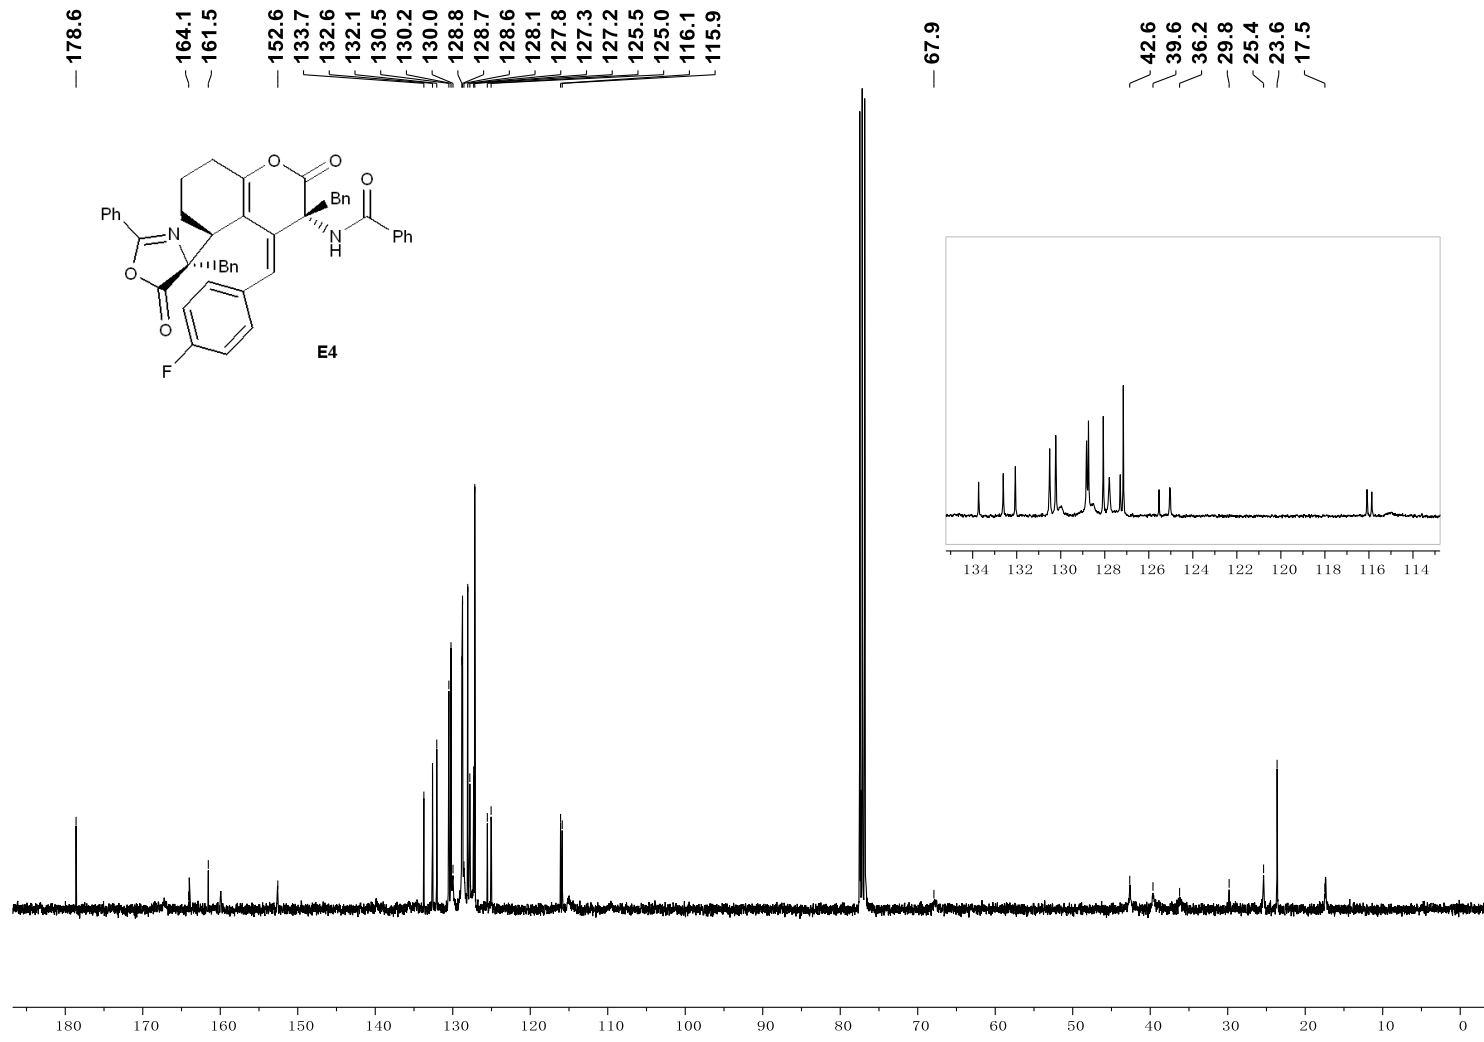

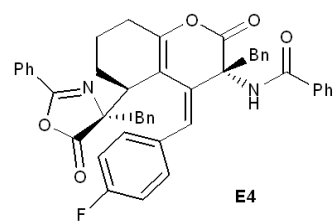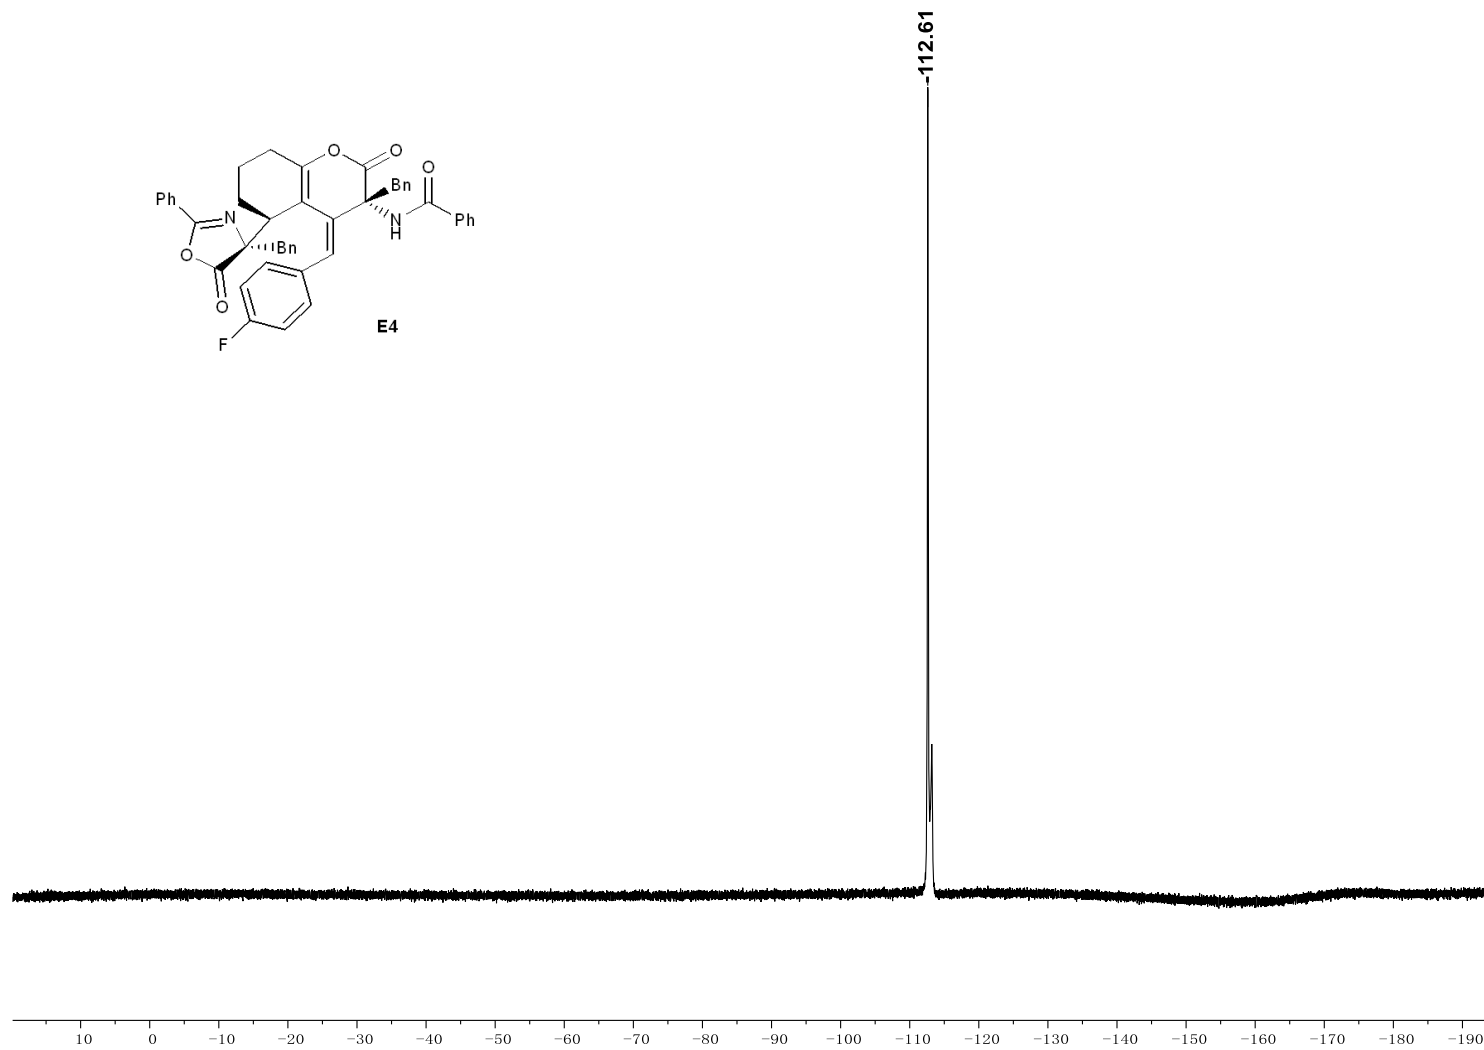

7.74  
7.50  
7.43  
7.41  
7.39  
7.34  
7.34  
7.32  
7.30  
7.28  
7.24  
7.20  
7.18  
7.14  
7.13  
7.05  
7.04  
7.03  
7.00  
6.80

4.50  
4.35  
4.30

3.53  
3.19  
3.00  
2.97  
2.61  
2.59  
2.57  
2.56  
2.54  
2.52  
2.49  
2.47  
1.99  
1.98  
1.95  
1.89  
1.87  
1.53  
1.26

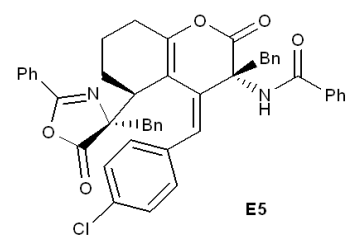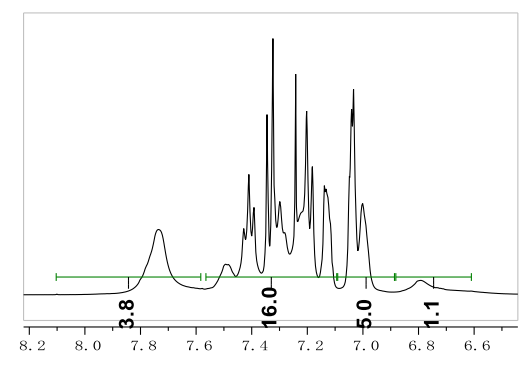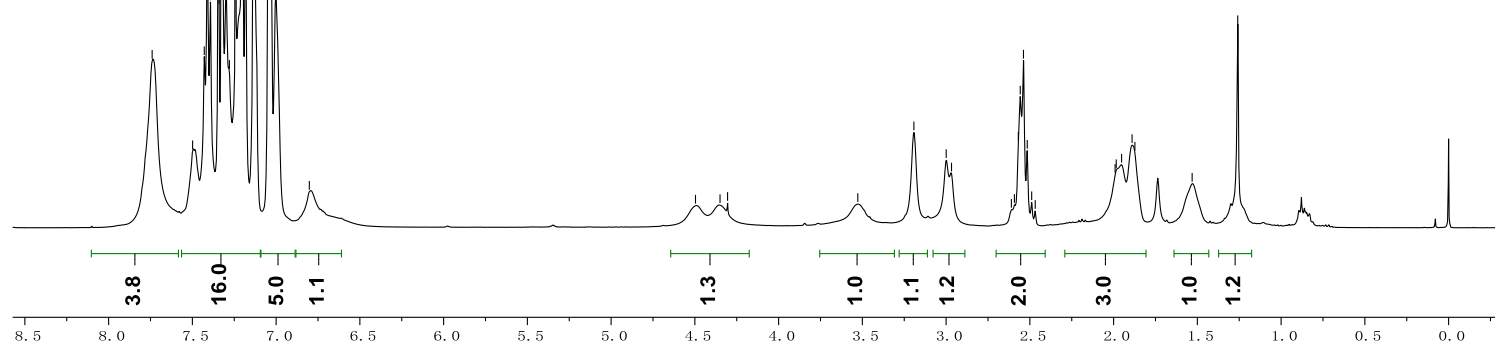

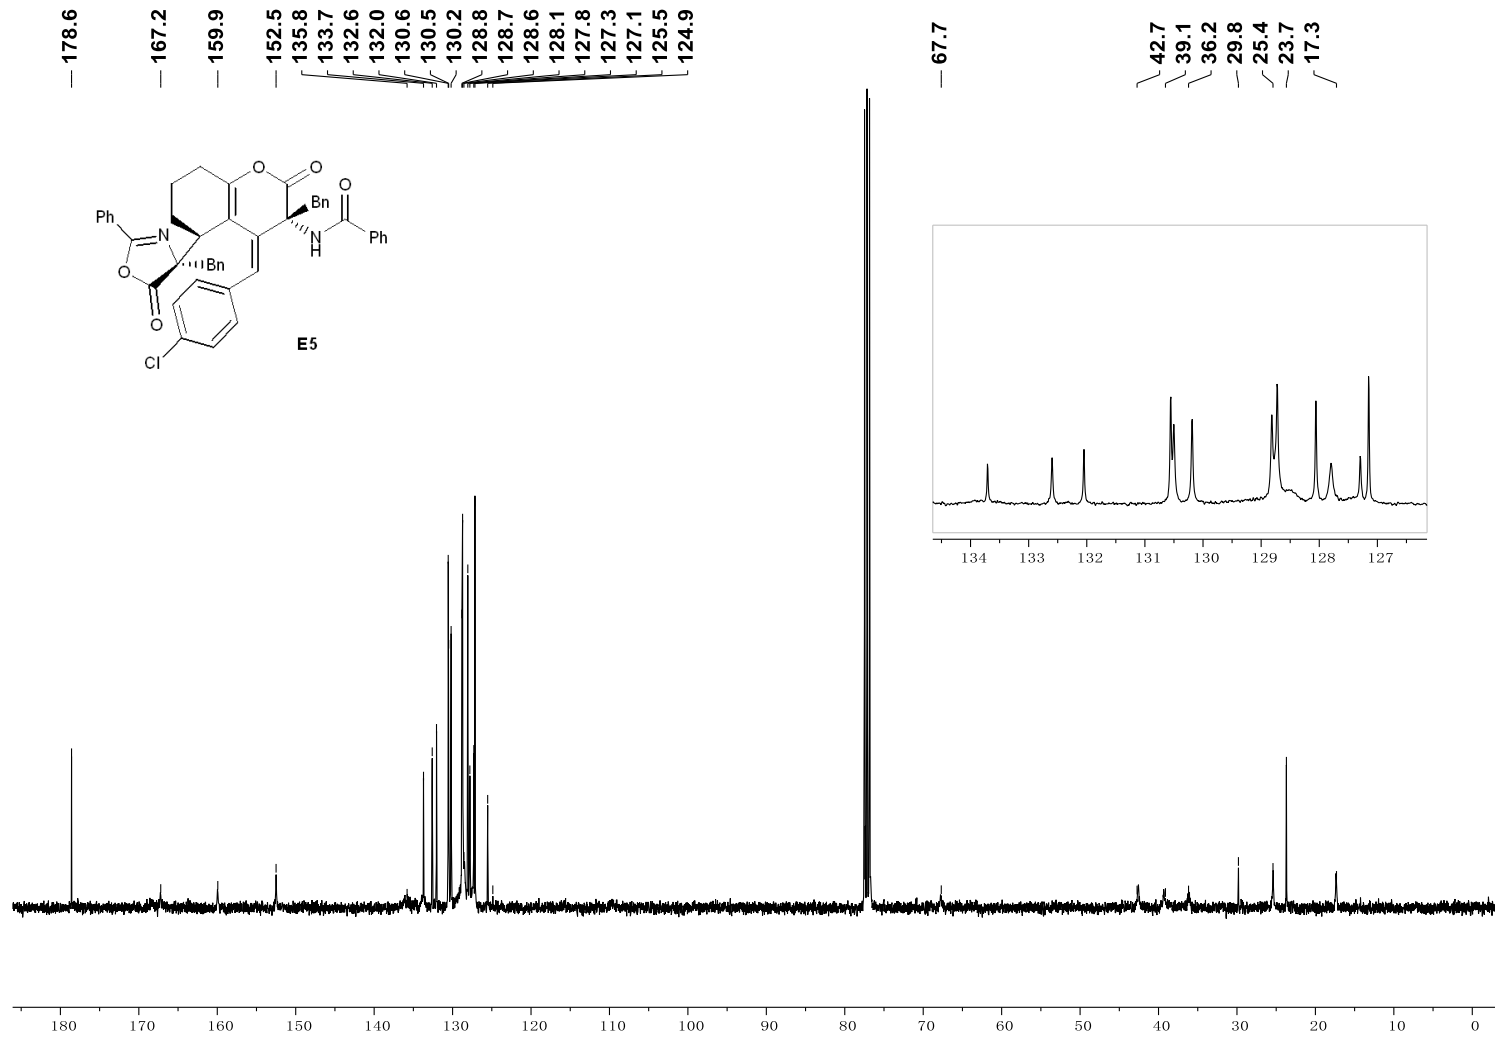



7.74  
7.72  
7.50  
7.48  
7.43  
7.41  
7.39  
7.32  
7.30  
7.24  
7.22  
7.14  
7.12  
7.04  
7.03  
7.00  
6.76

4.49  
4.35  
4.30

3.53  
3.20  
3.00  
2.97  
2.61  
2.59  
2.55  
2.54  
2.51  
2.49  
2.47  
1.99  
1.96  
1.89  
1.87  
1.53  
1.30  
1.26  
1.22

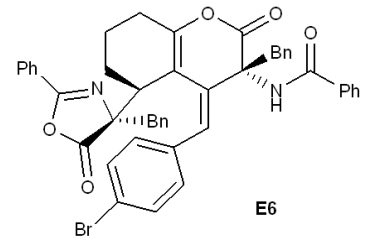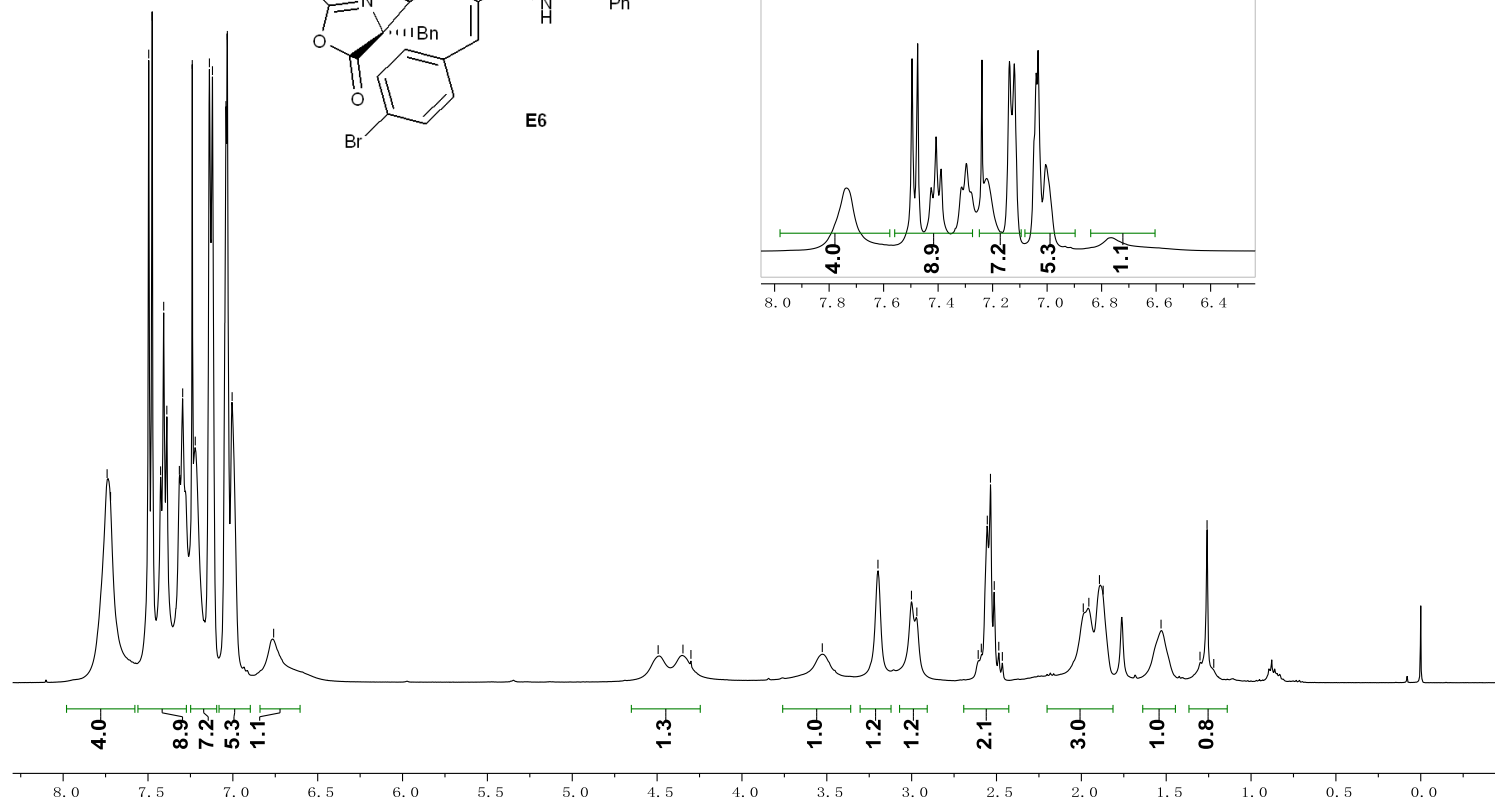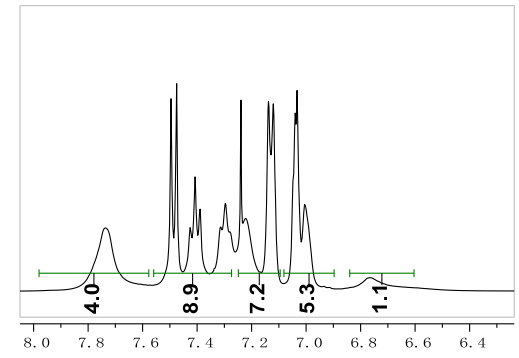

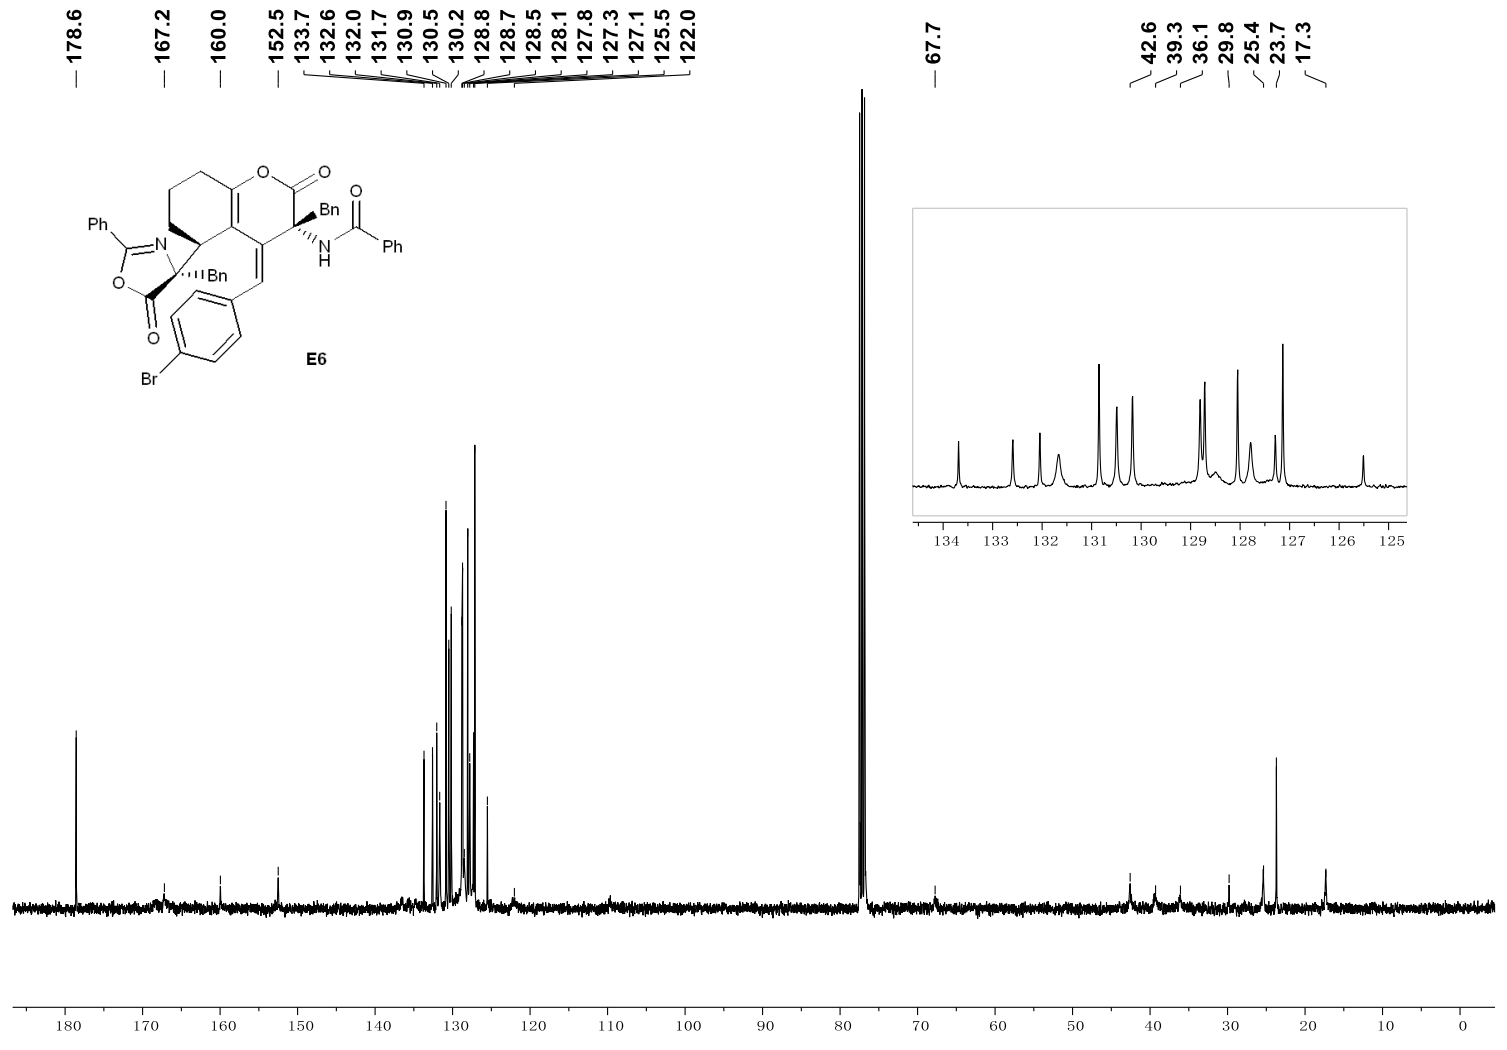

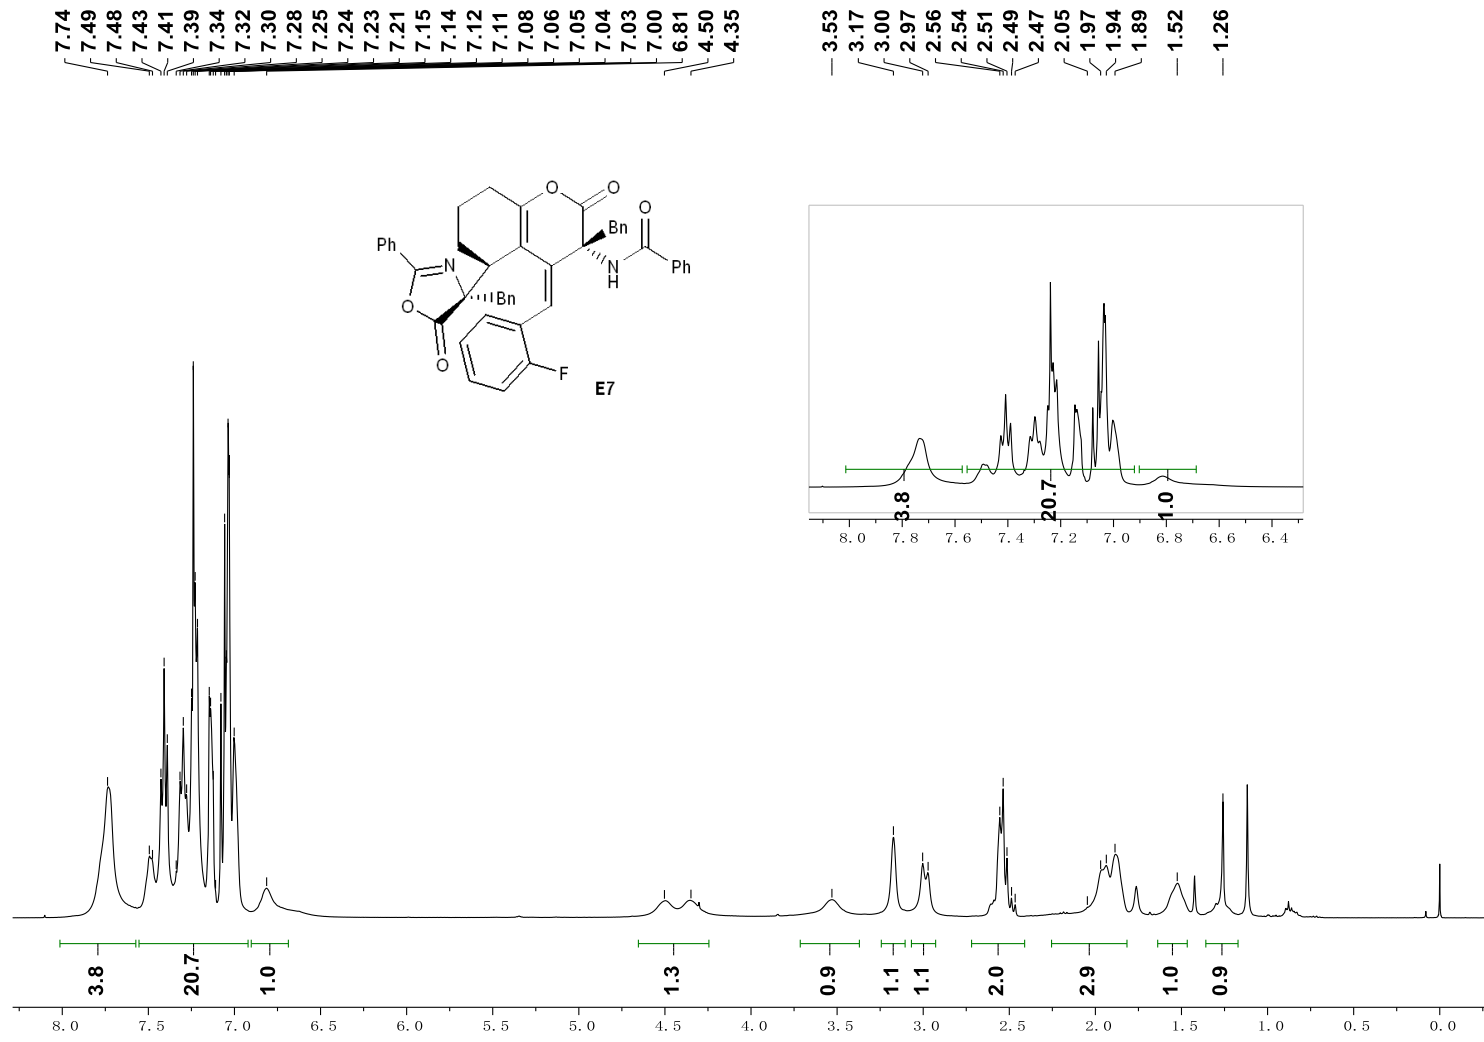

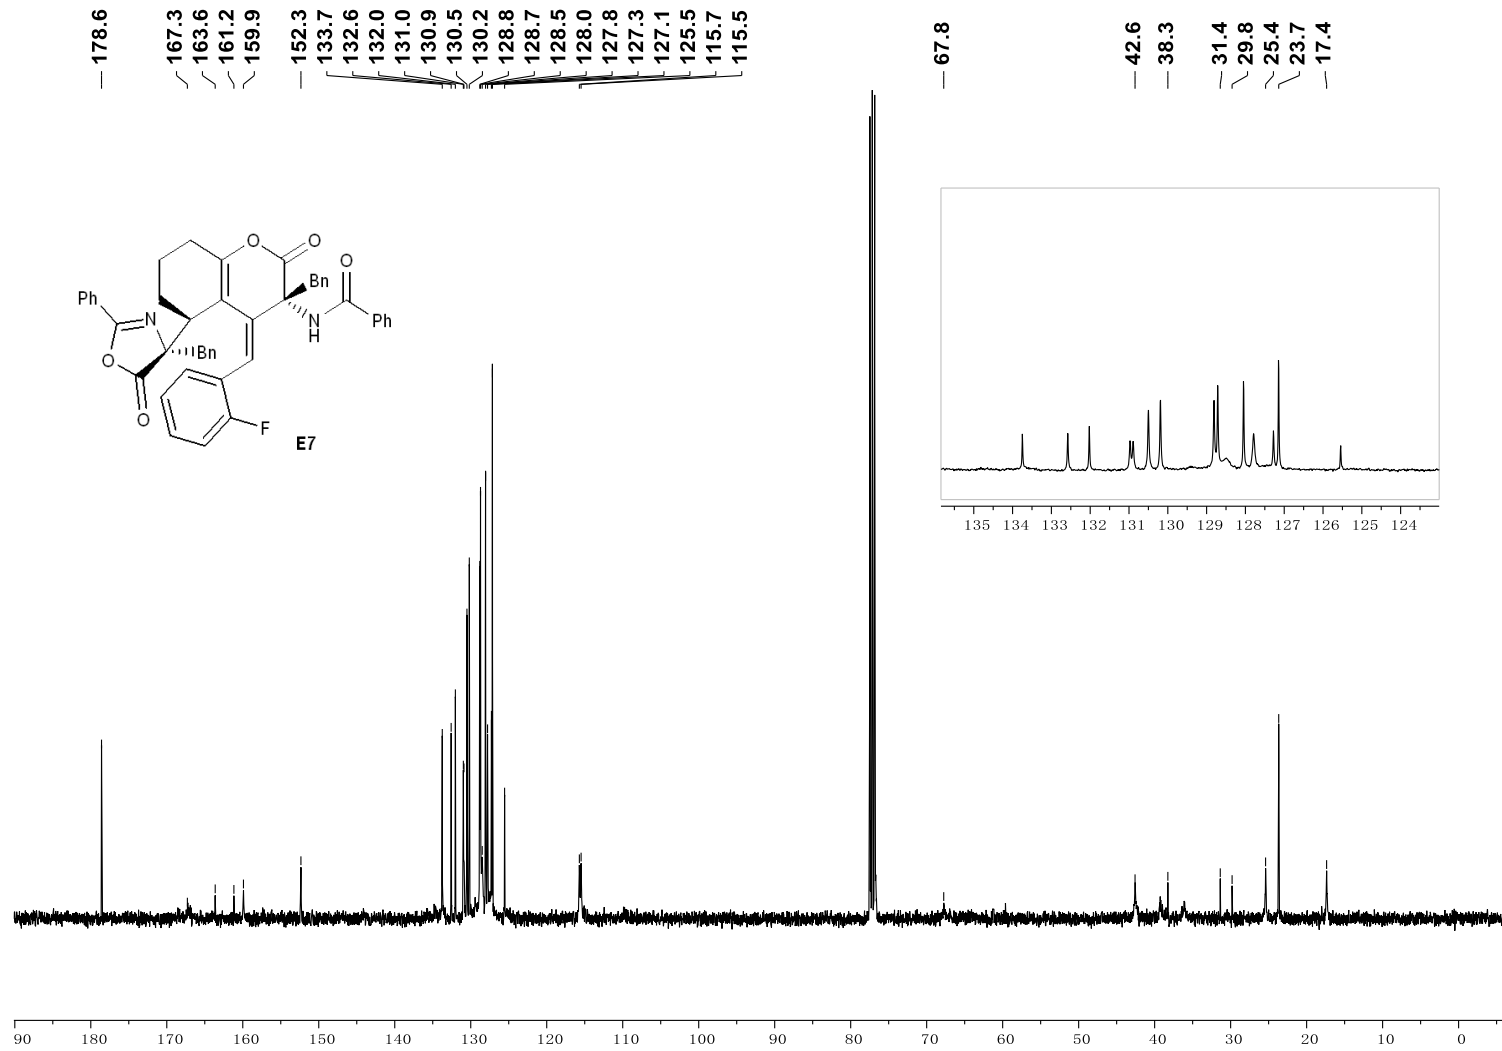



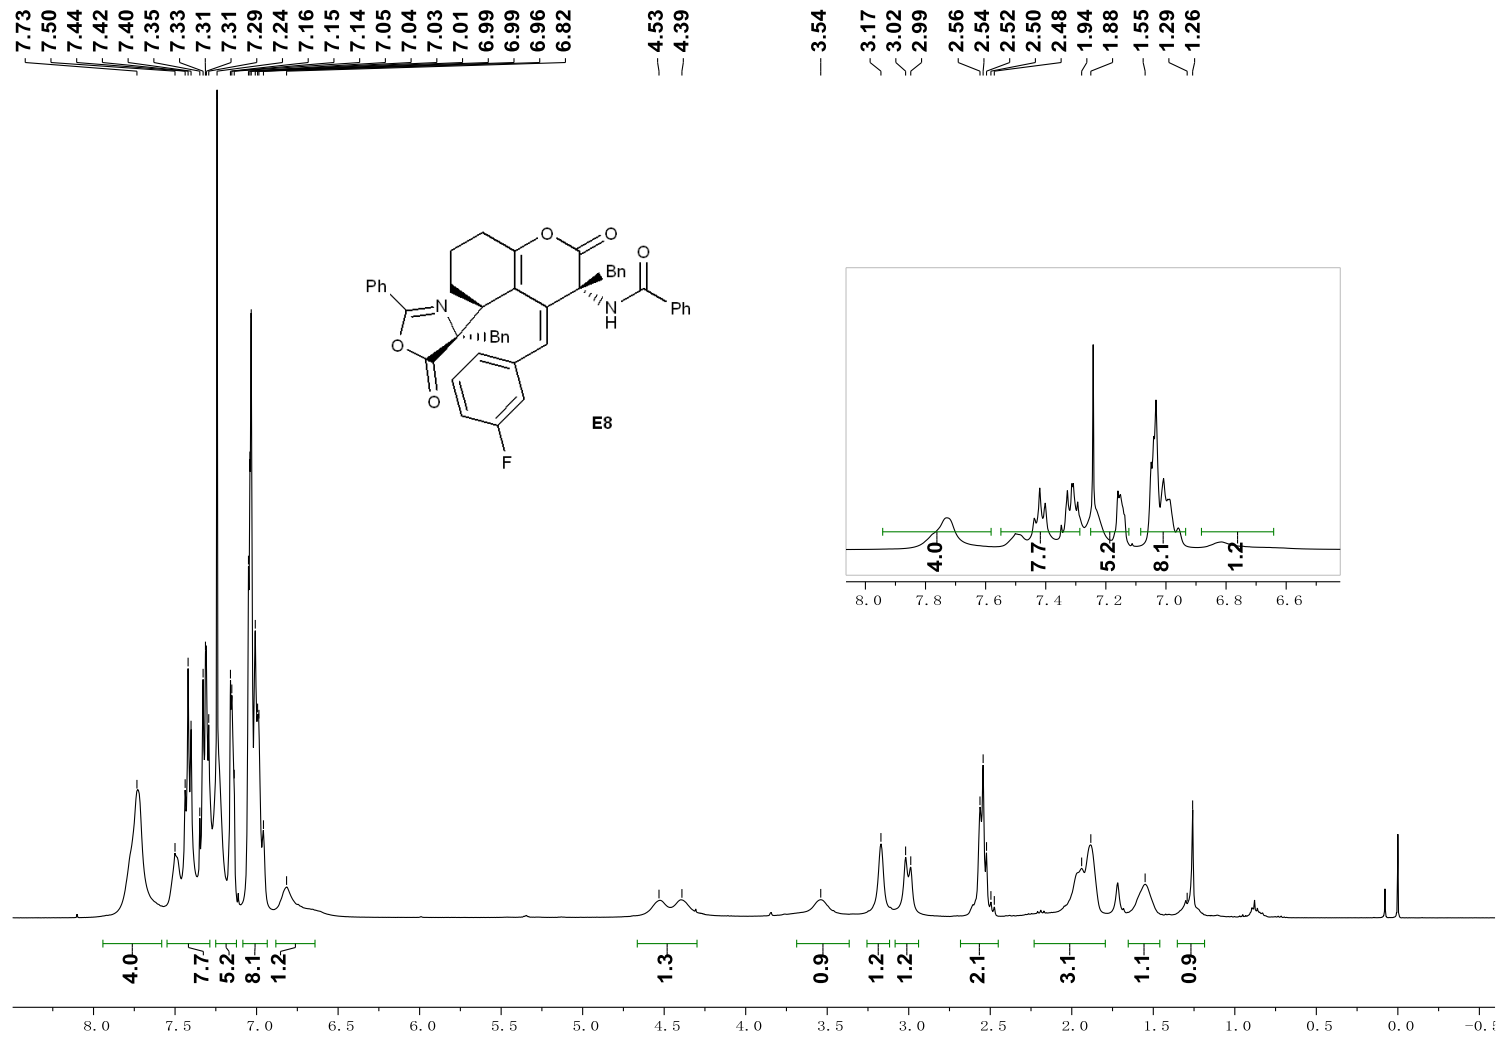

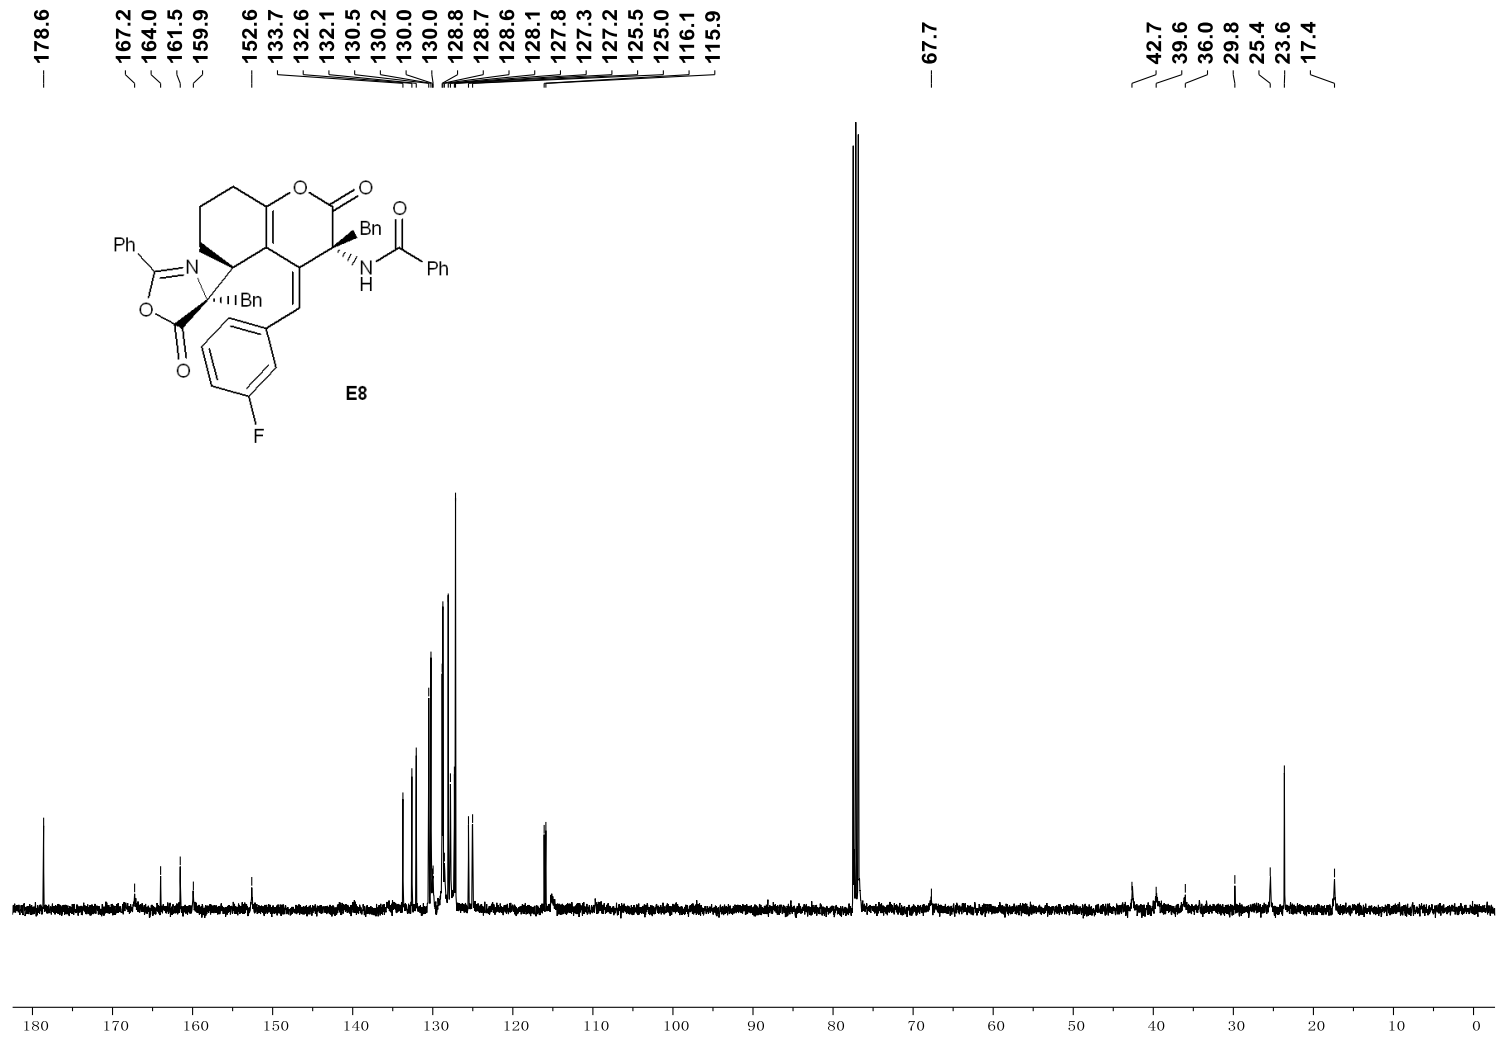

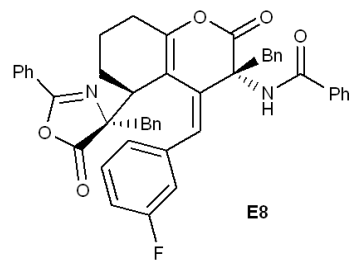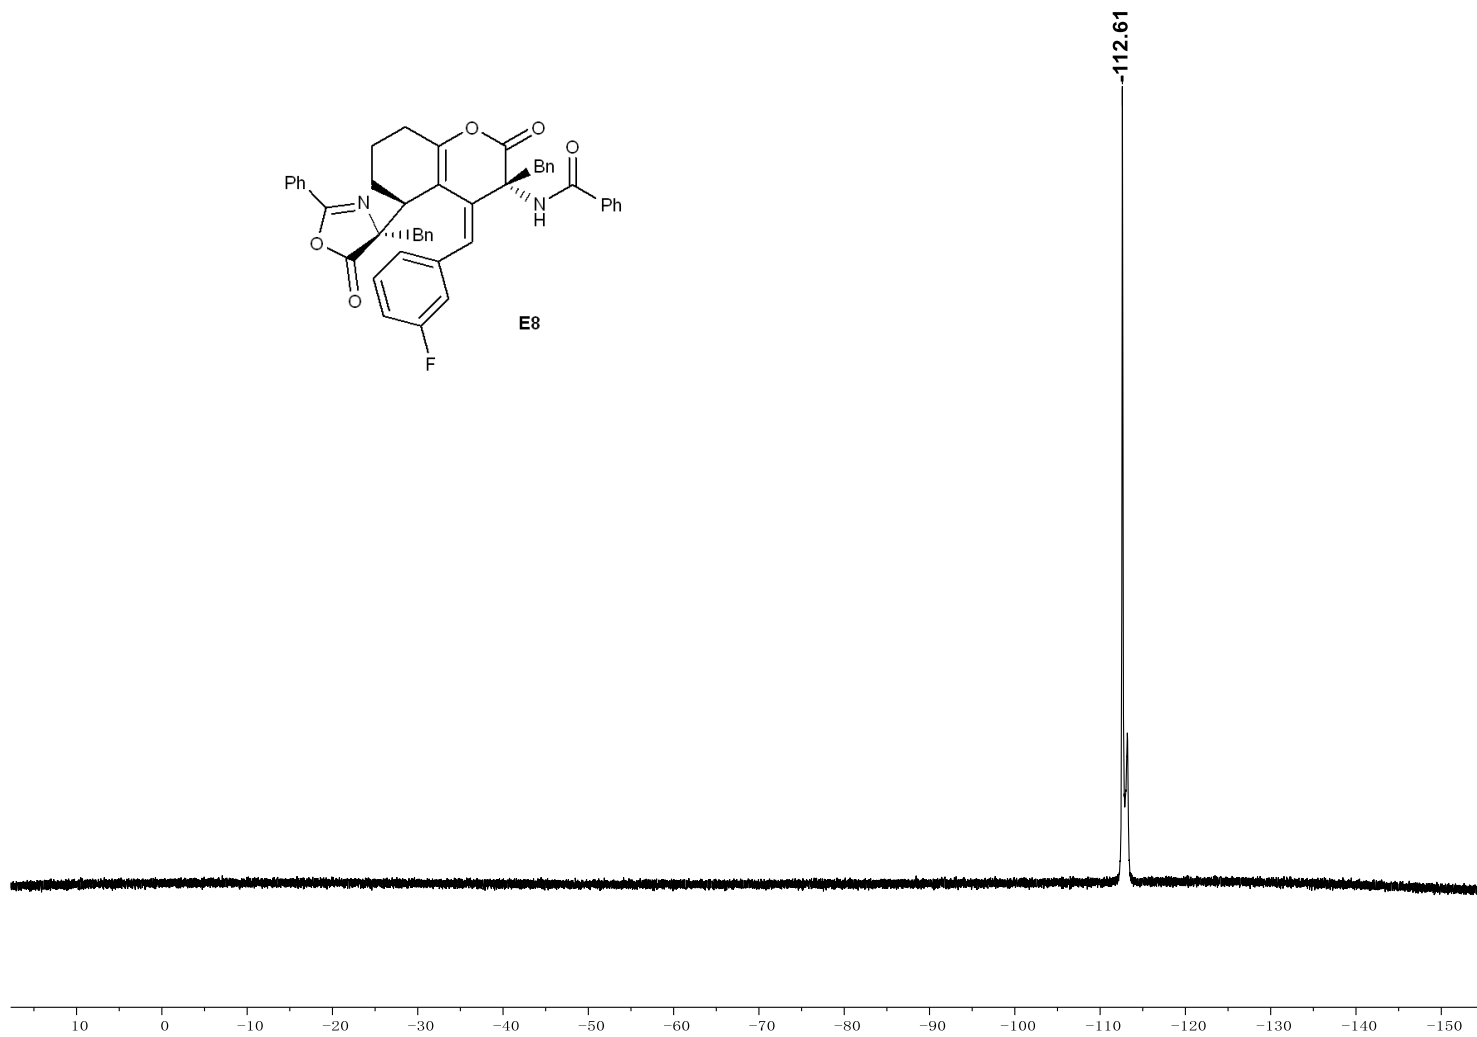



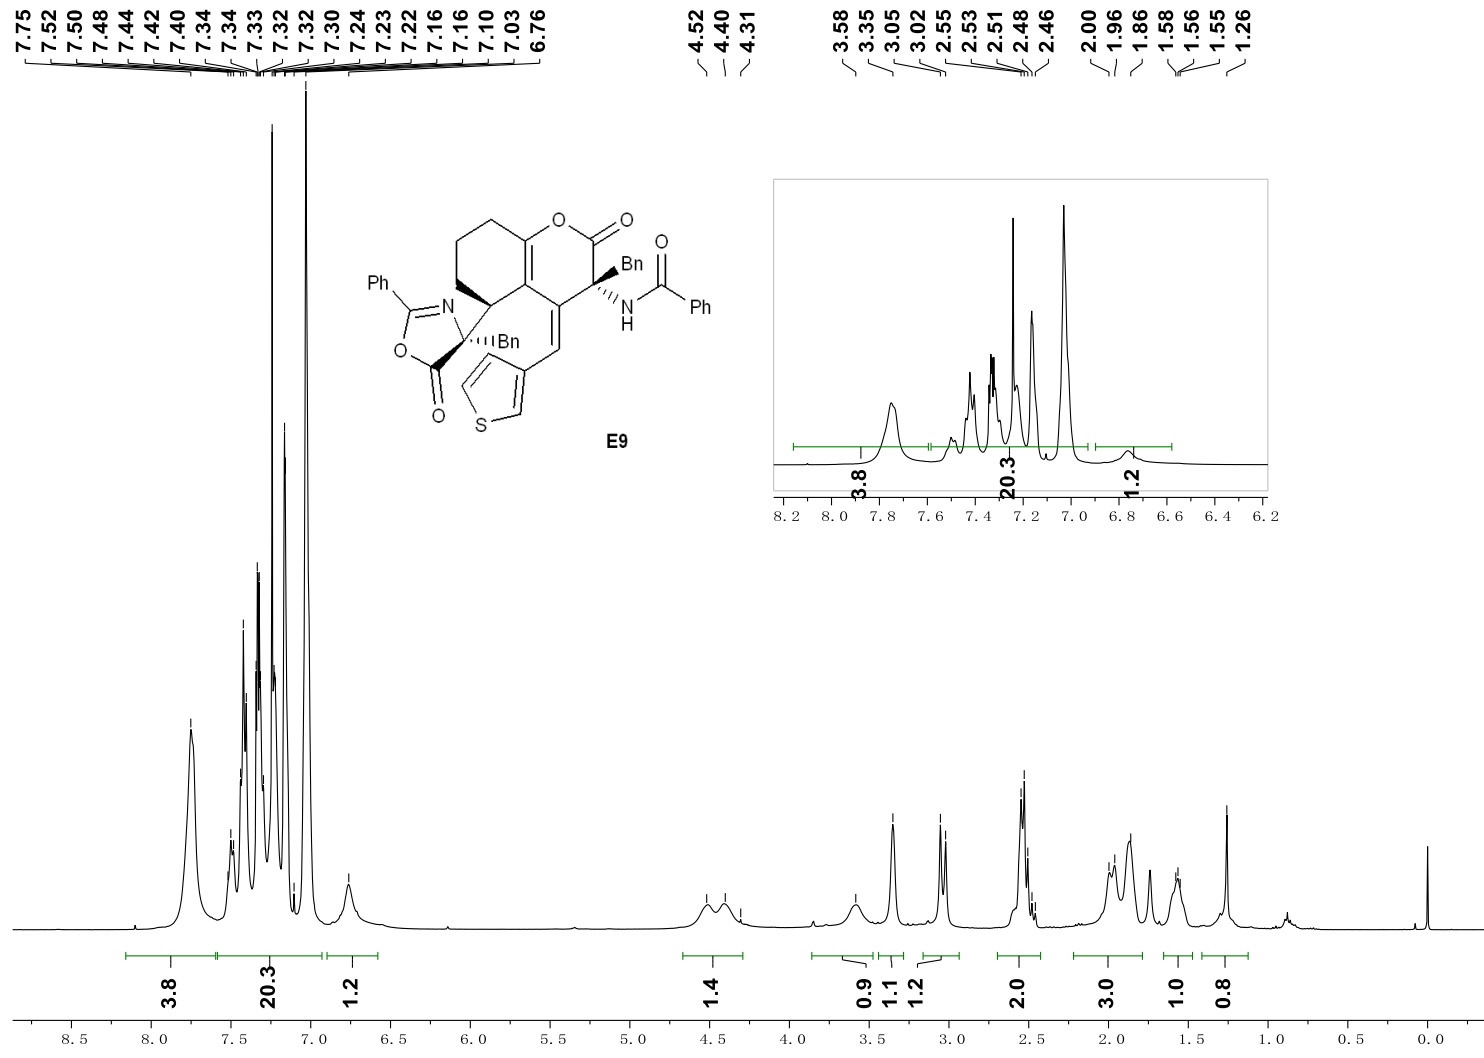

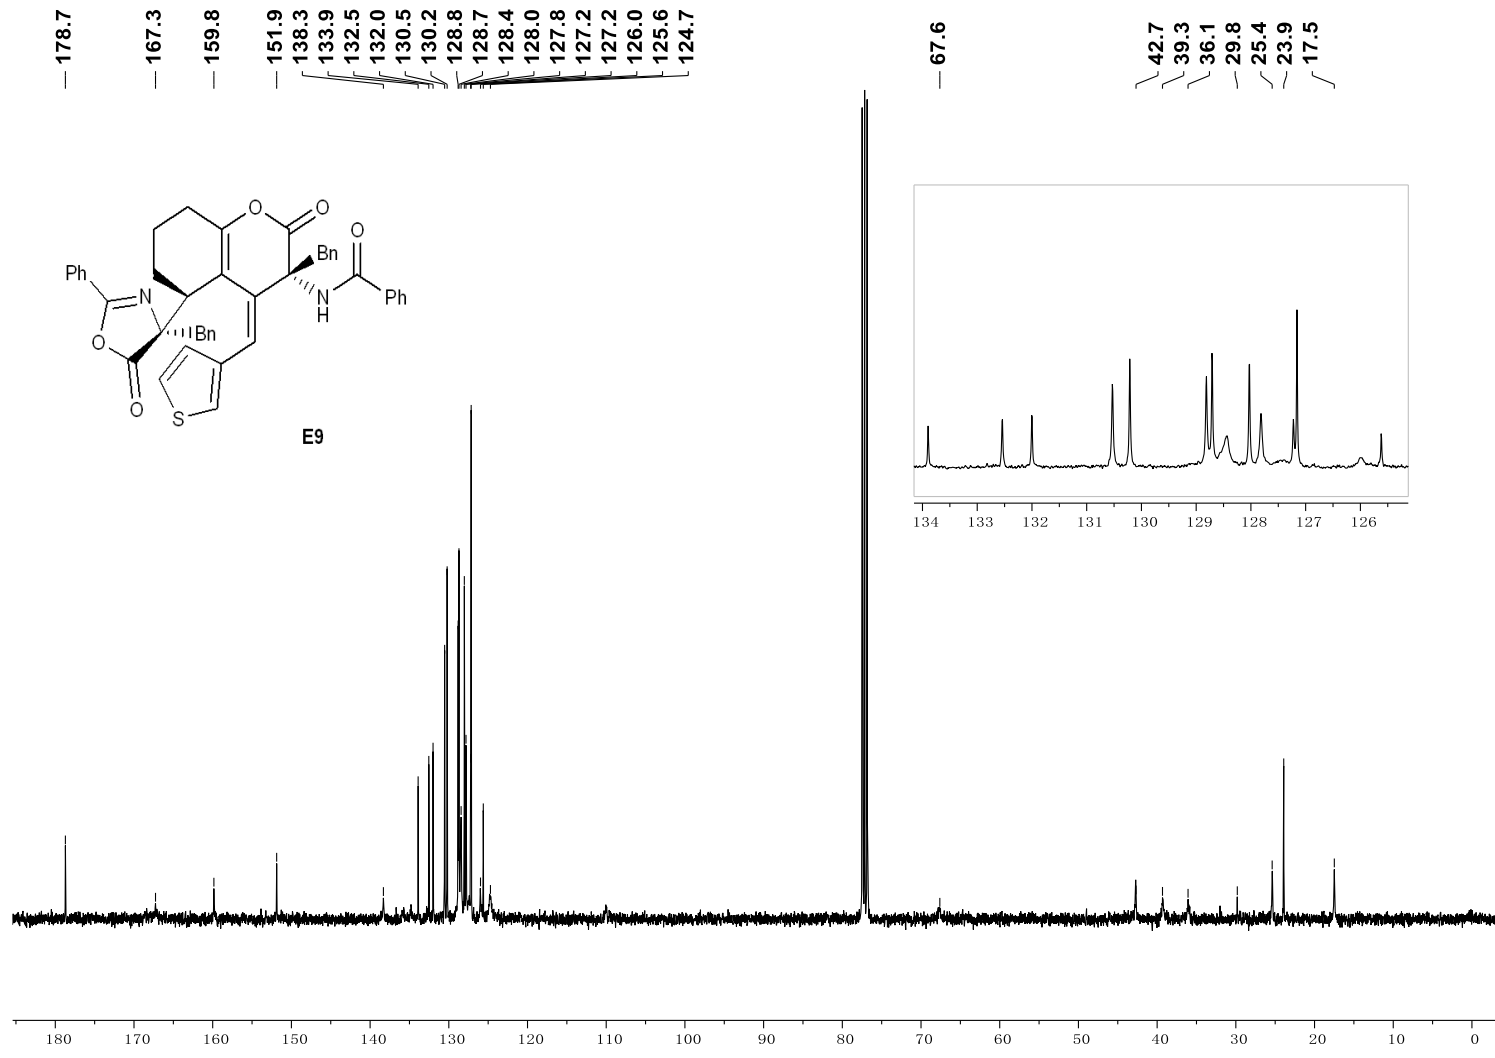

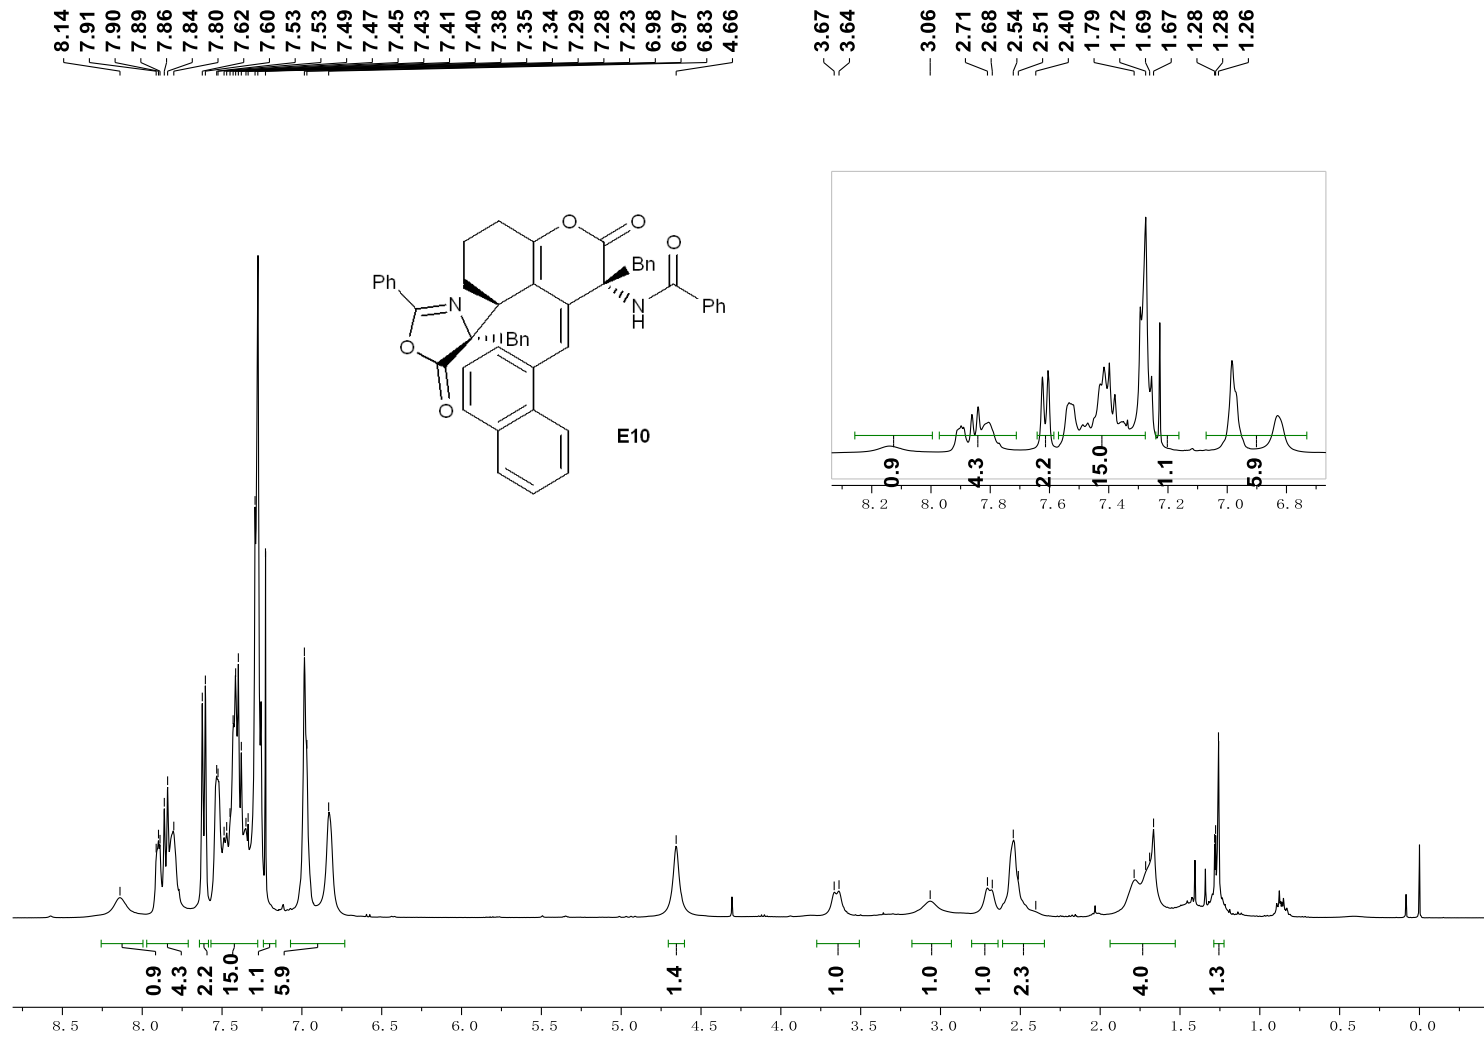

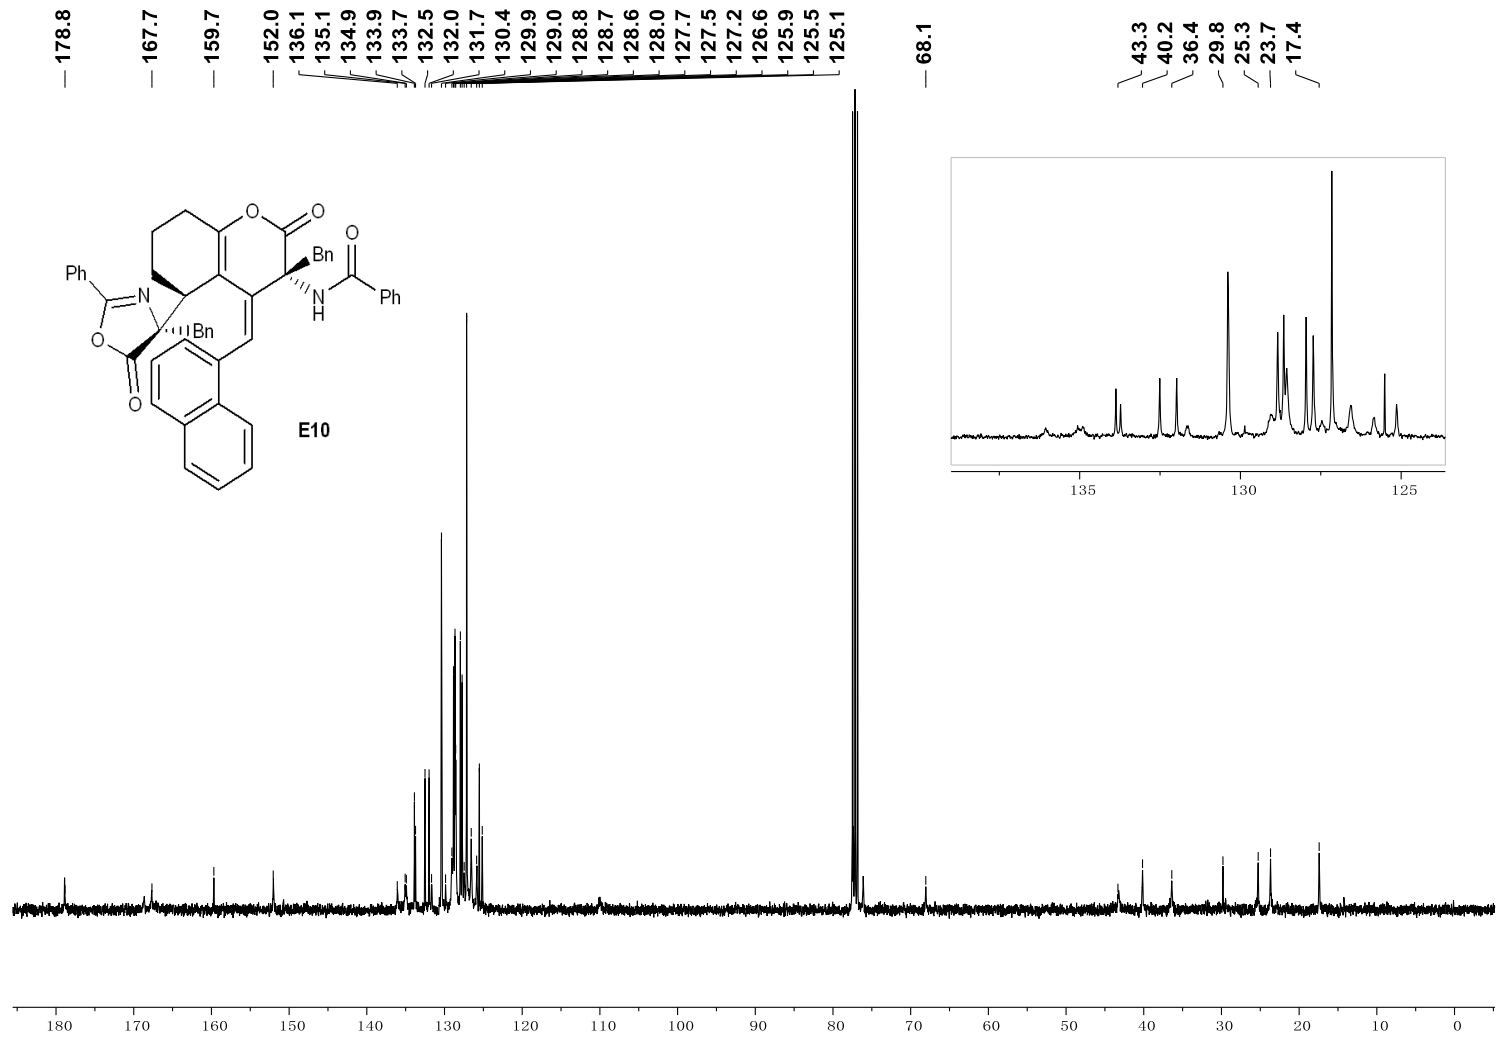

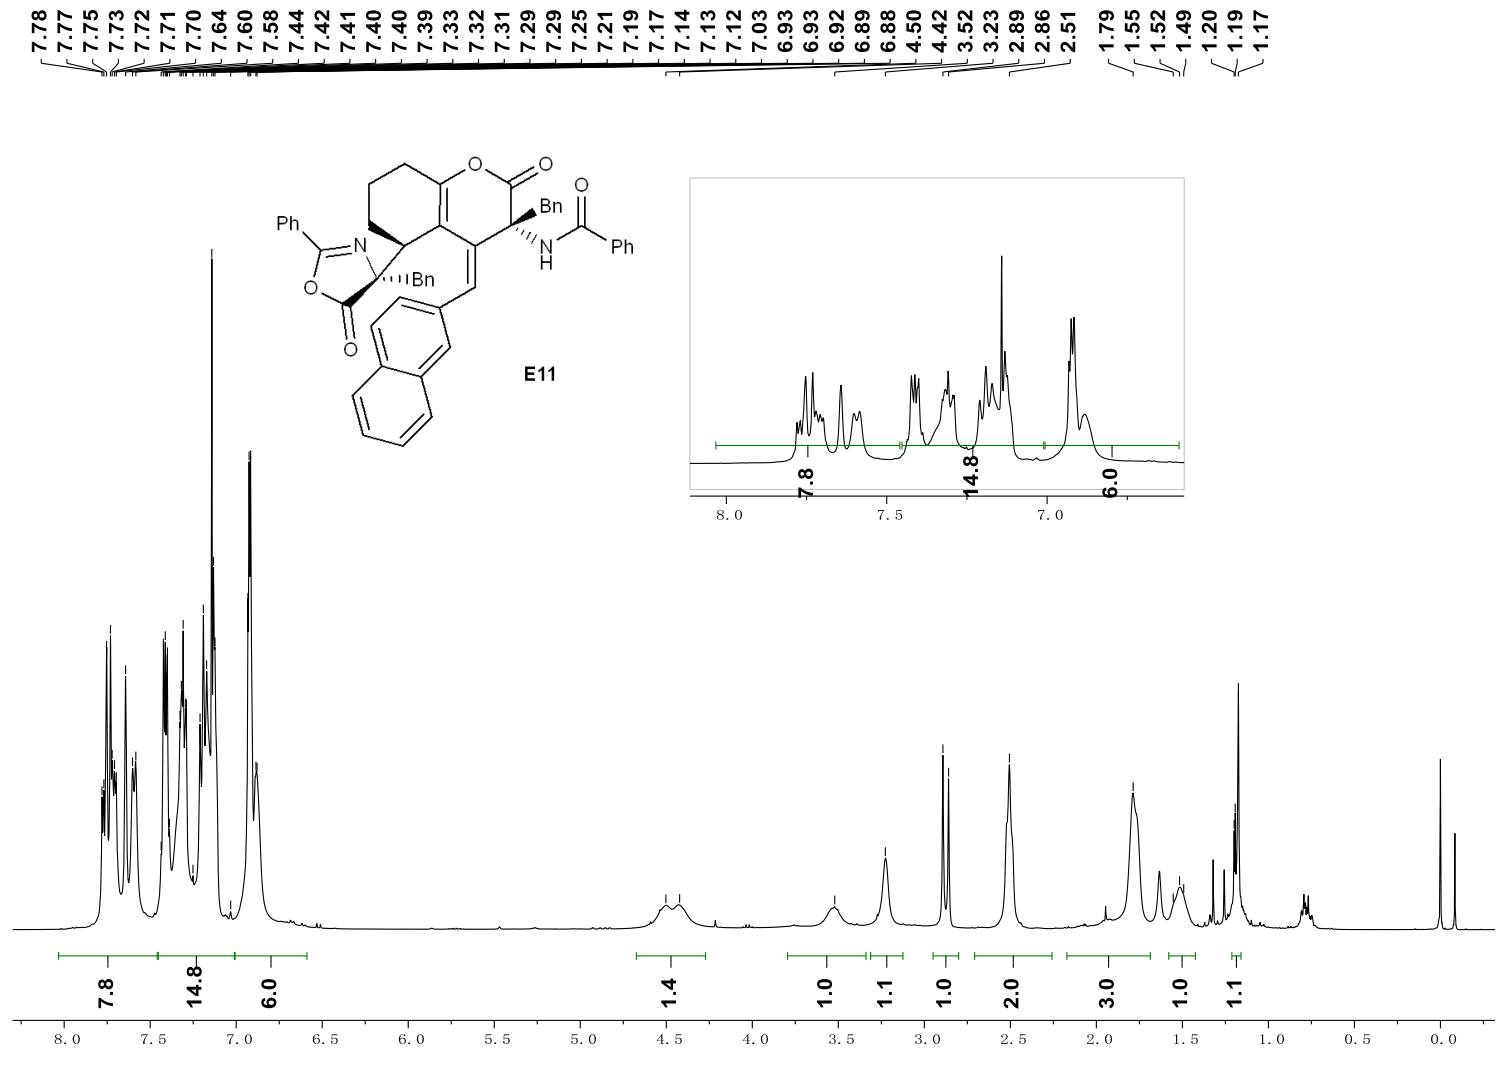

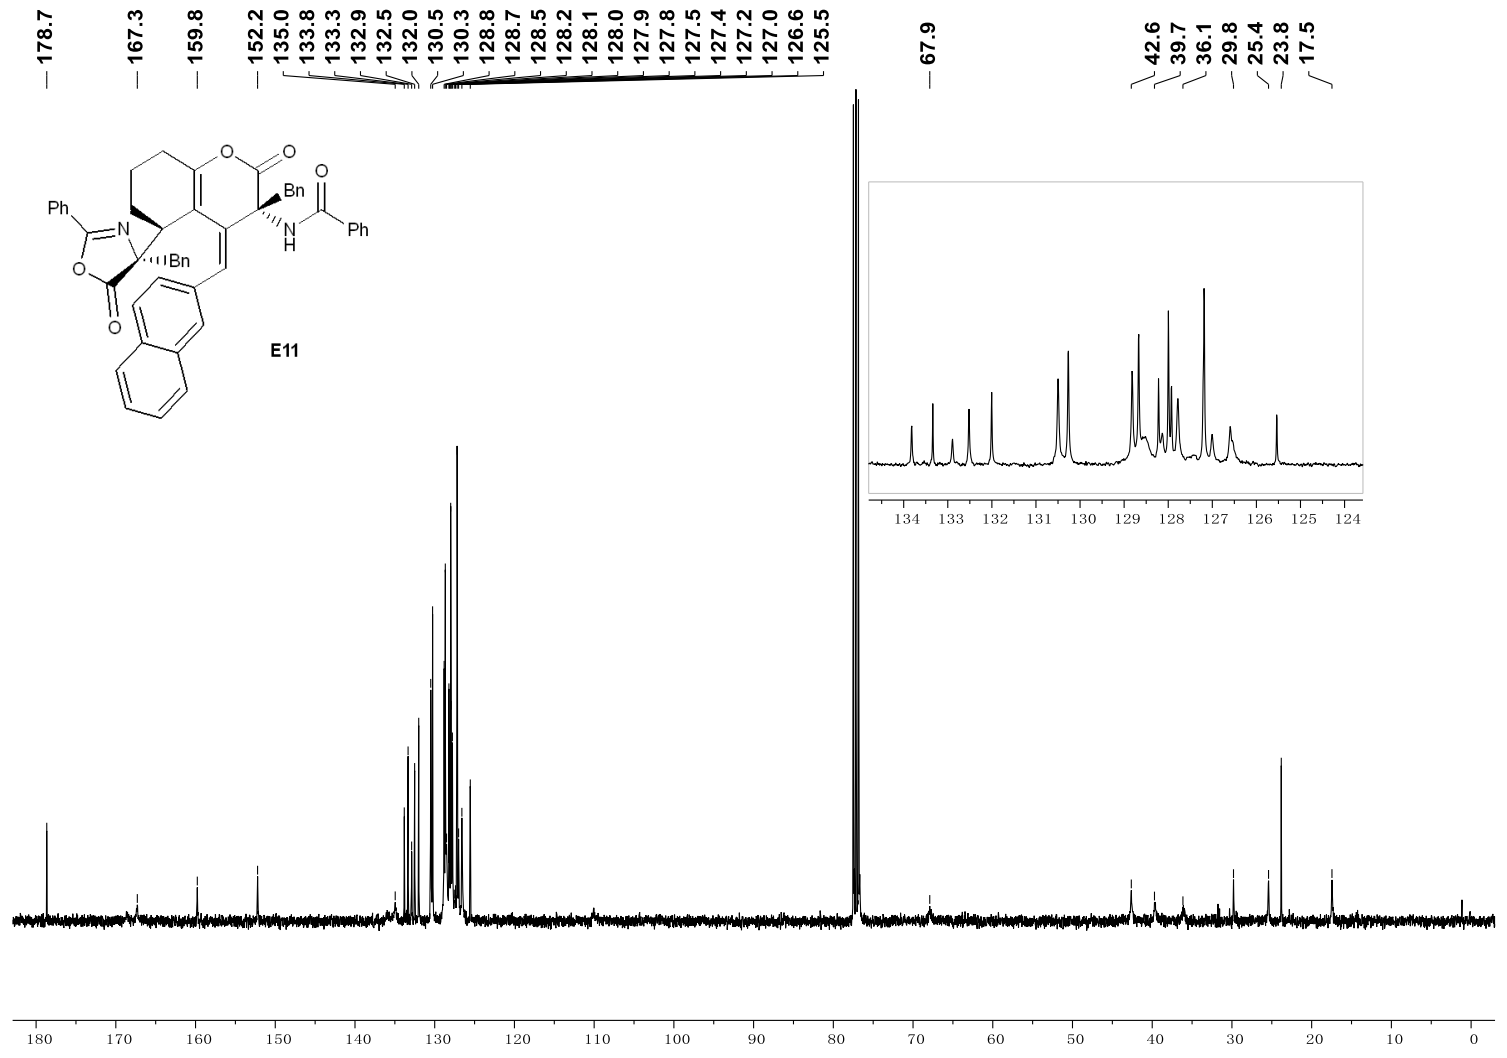

7.79  
7.70  
7.50  
7.44  
7.42  
7.40  
7.38  
7.29  
7.27  
7.24  
7.17  
7.16  
7.15  
7.01  
7.01  
6.97  
6.68

4.44  
4.36  
4.29  
4.21  
4.03  
3.81  
3.71  
3.55

3.00  
2.97

— 2.50

1.98  
1.84  
1.74  
1.67  
1.62

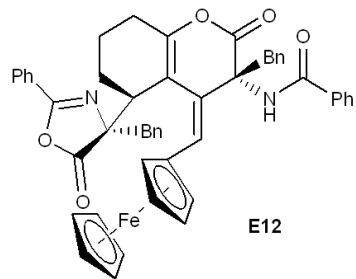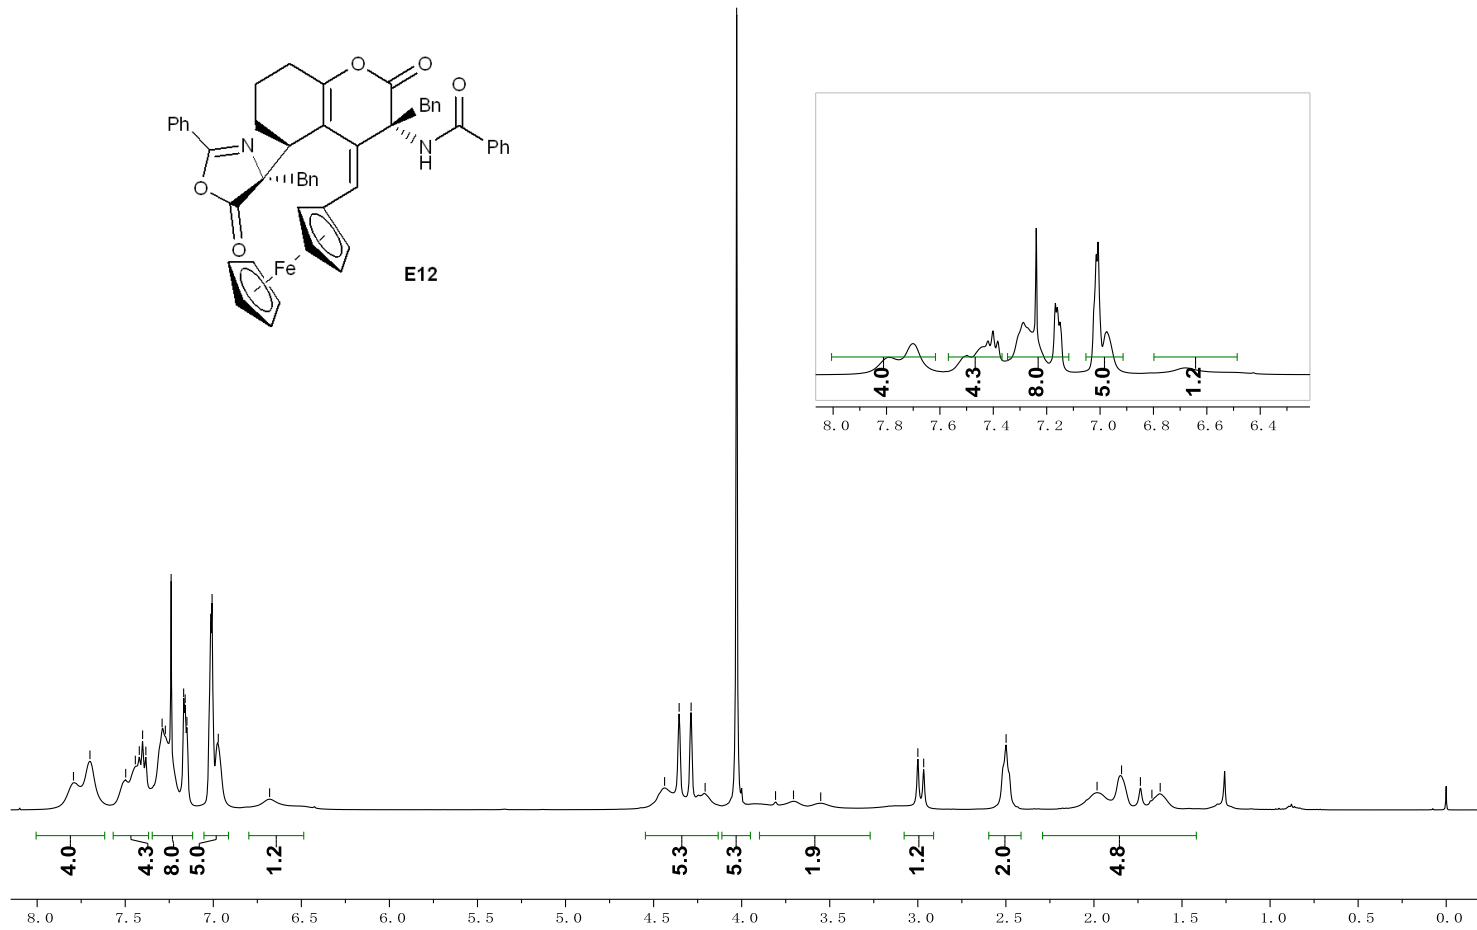

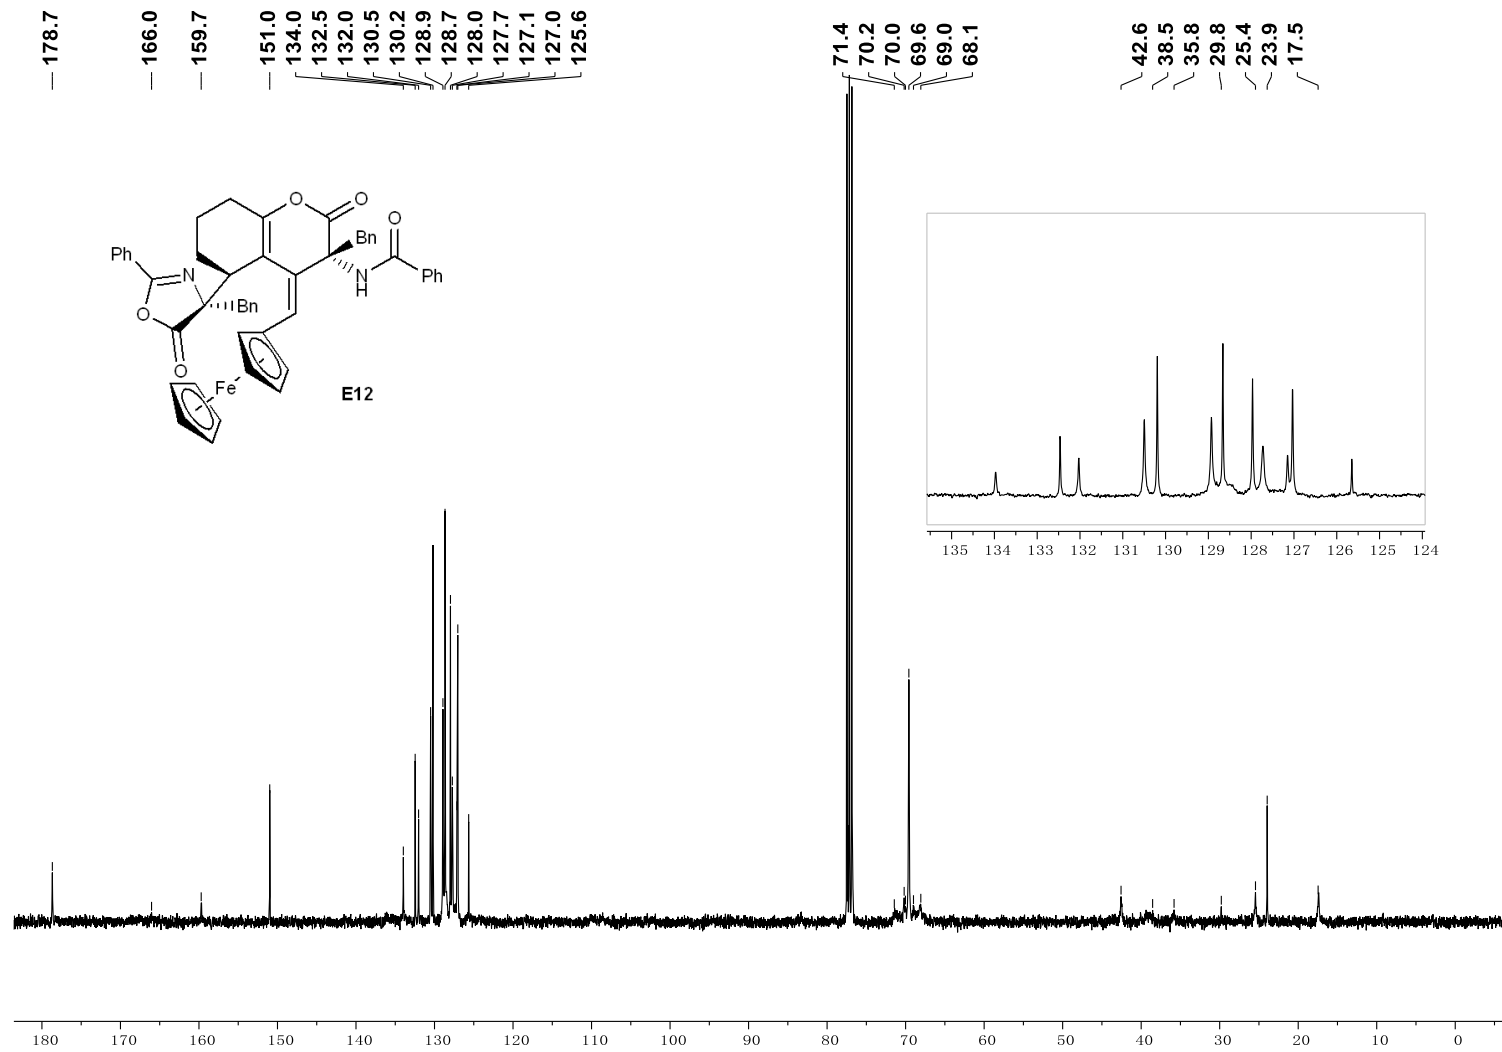



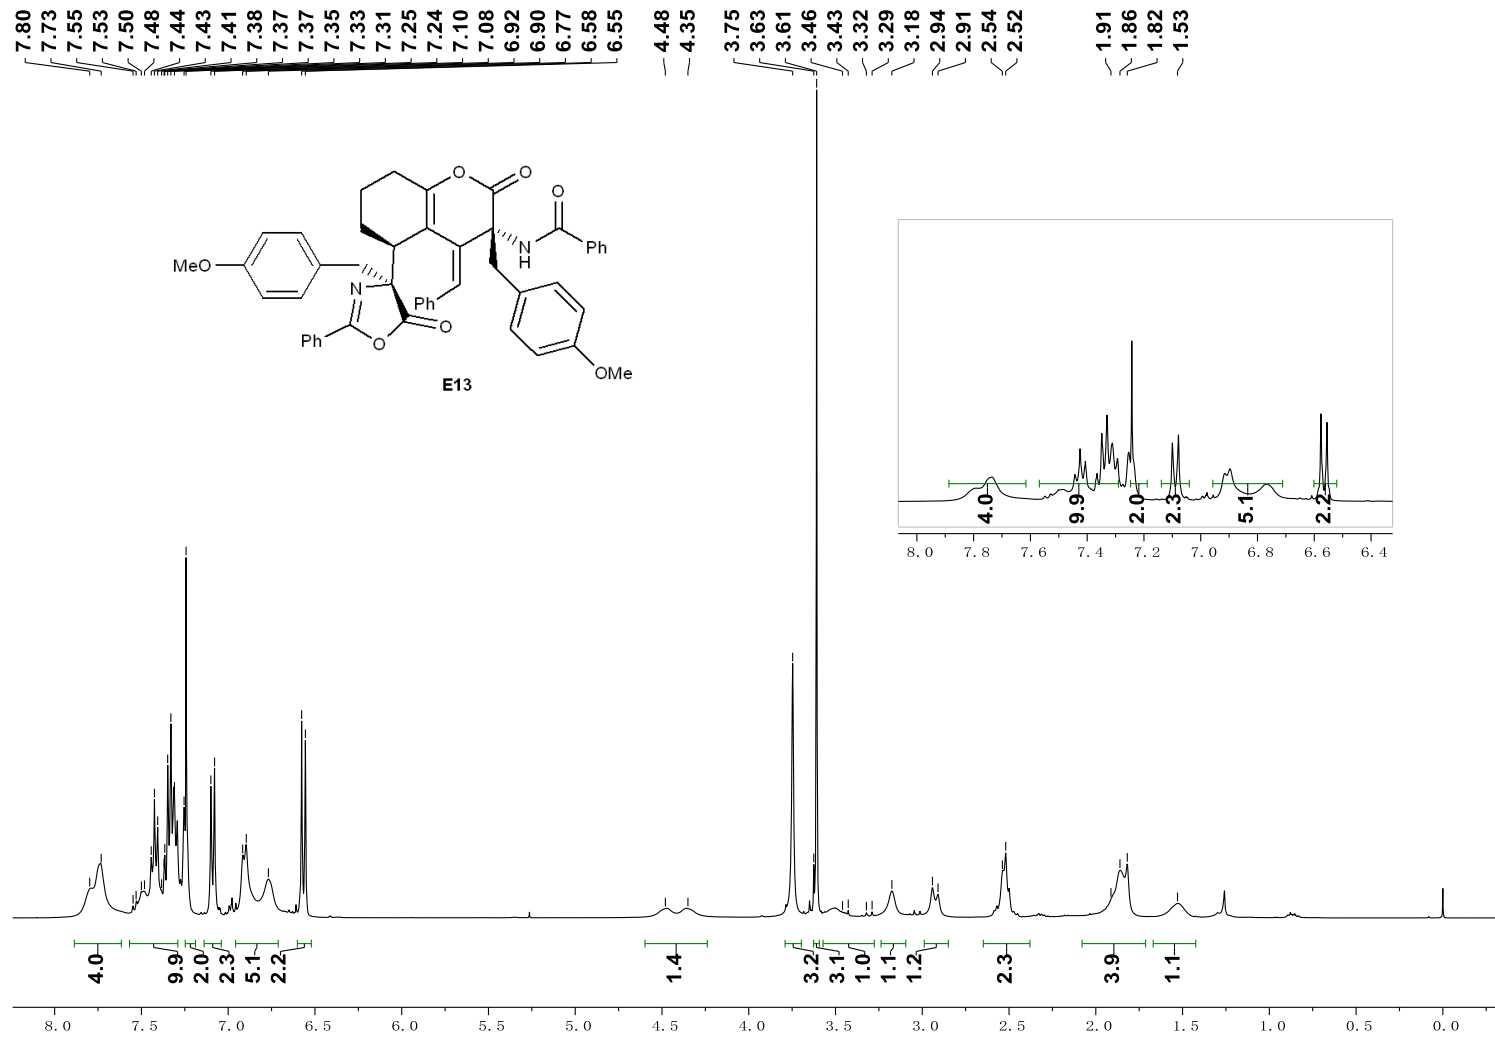

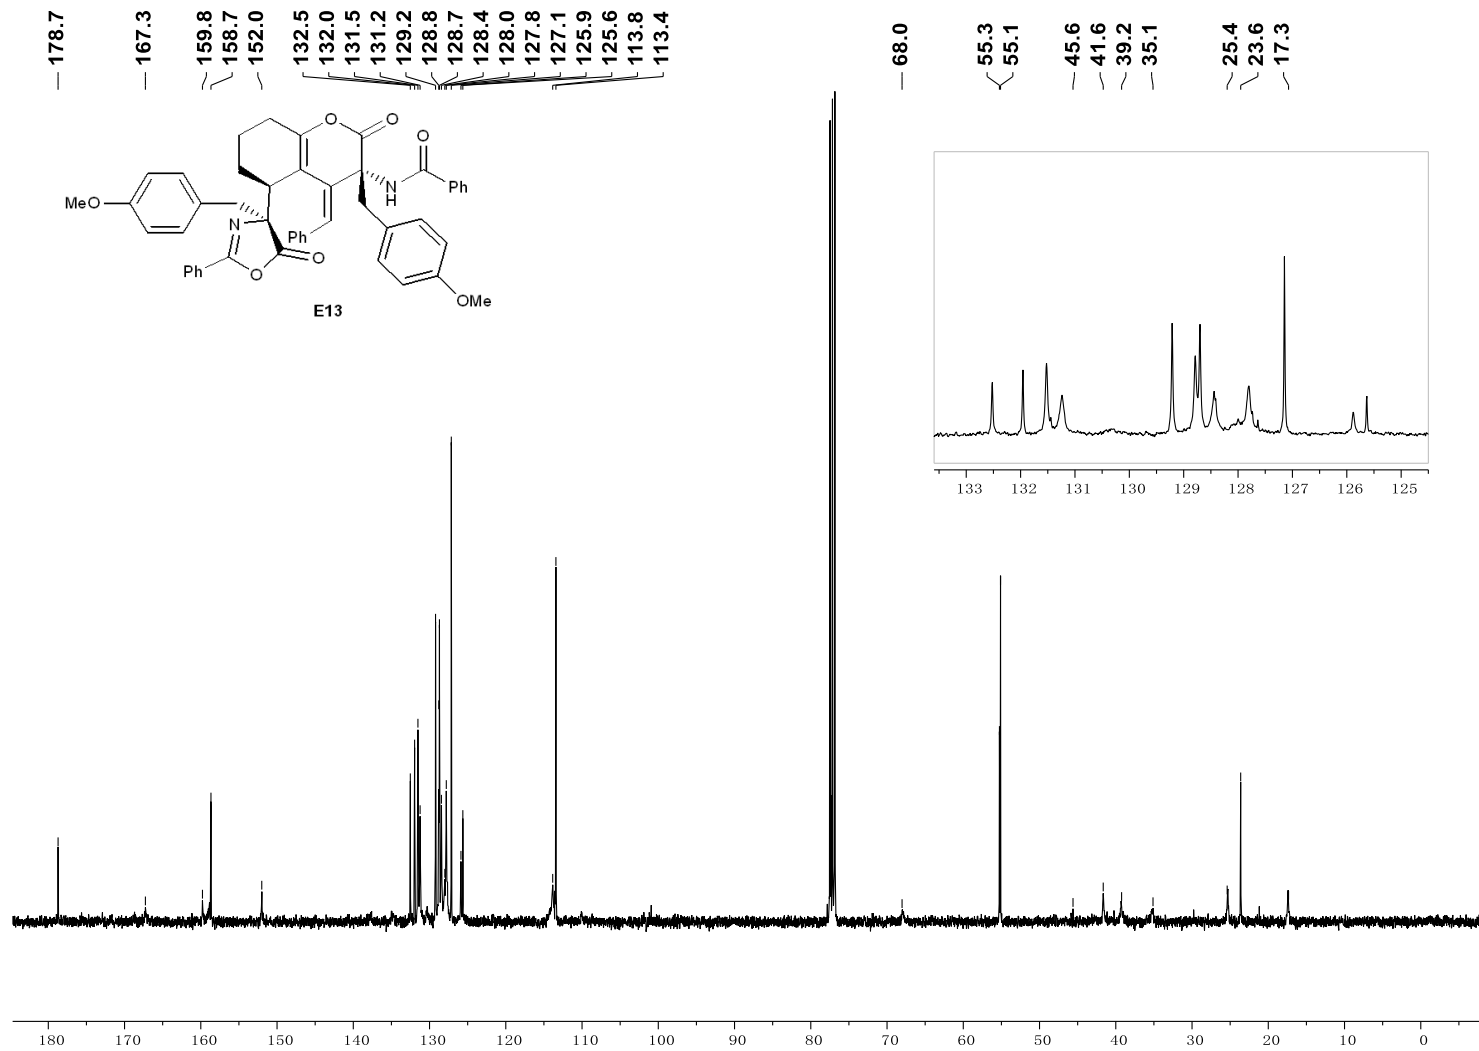

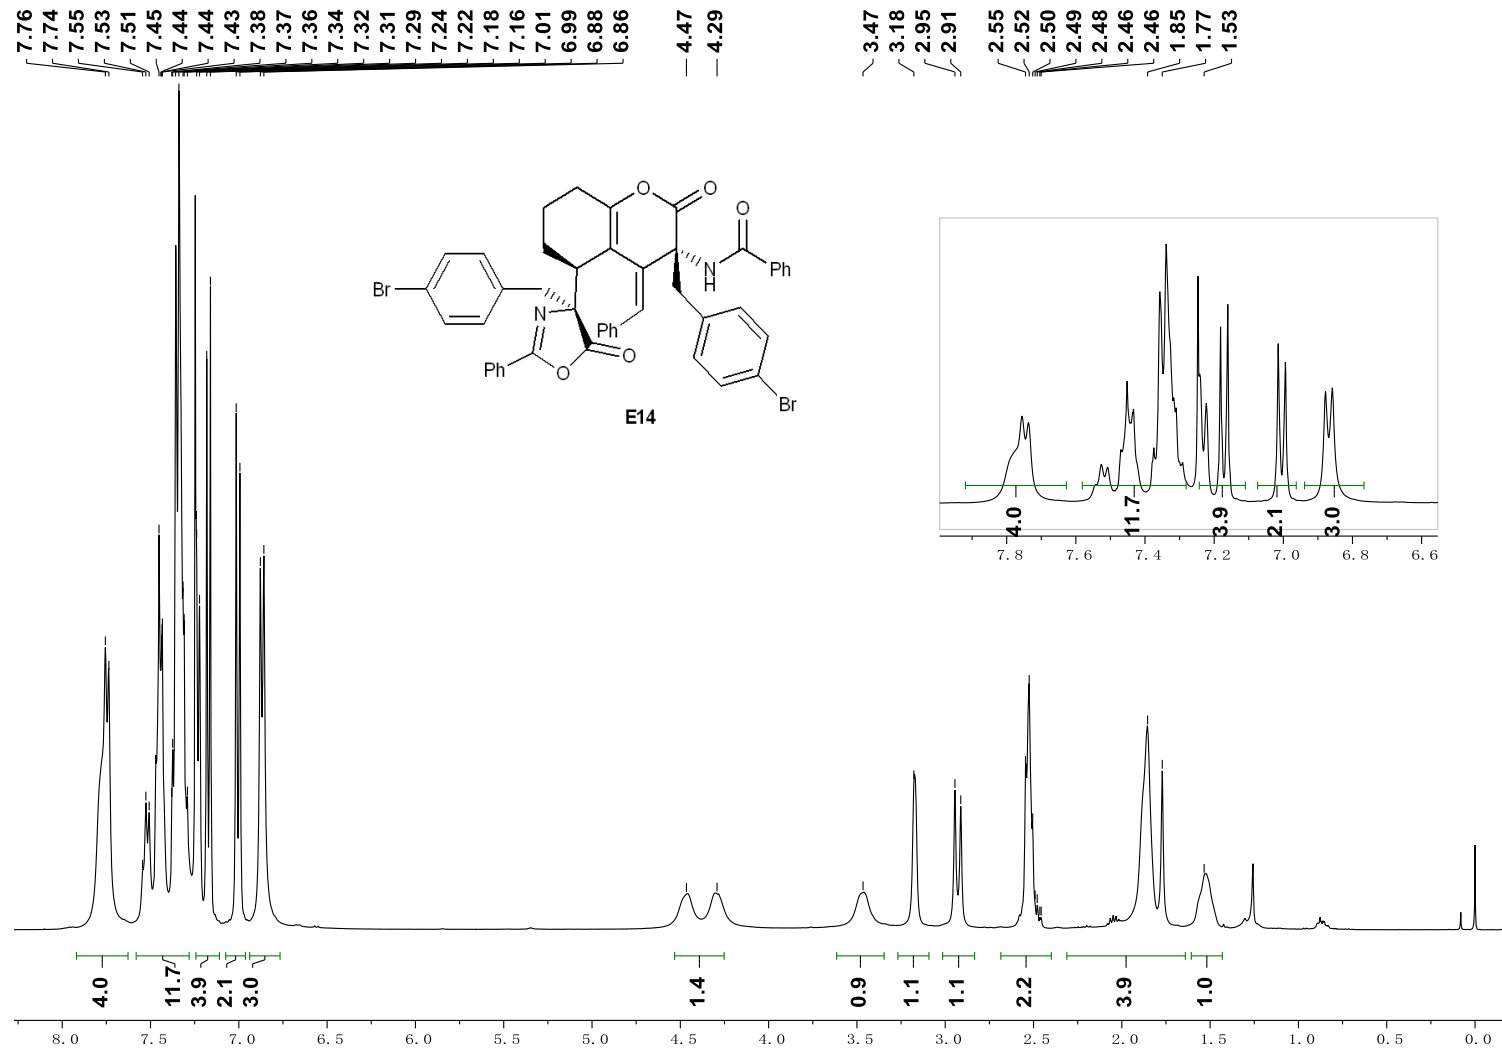

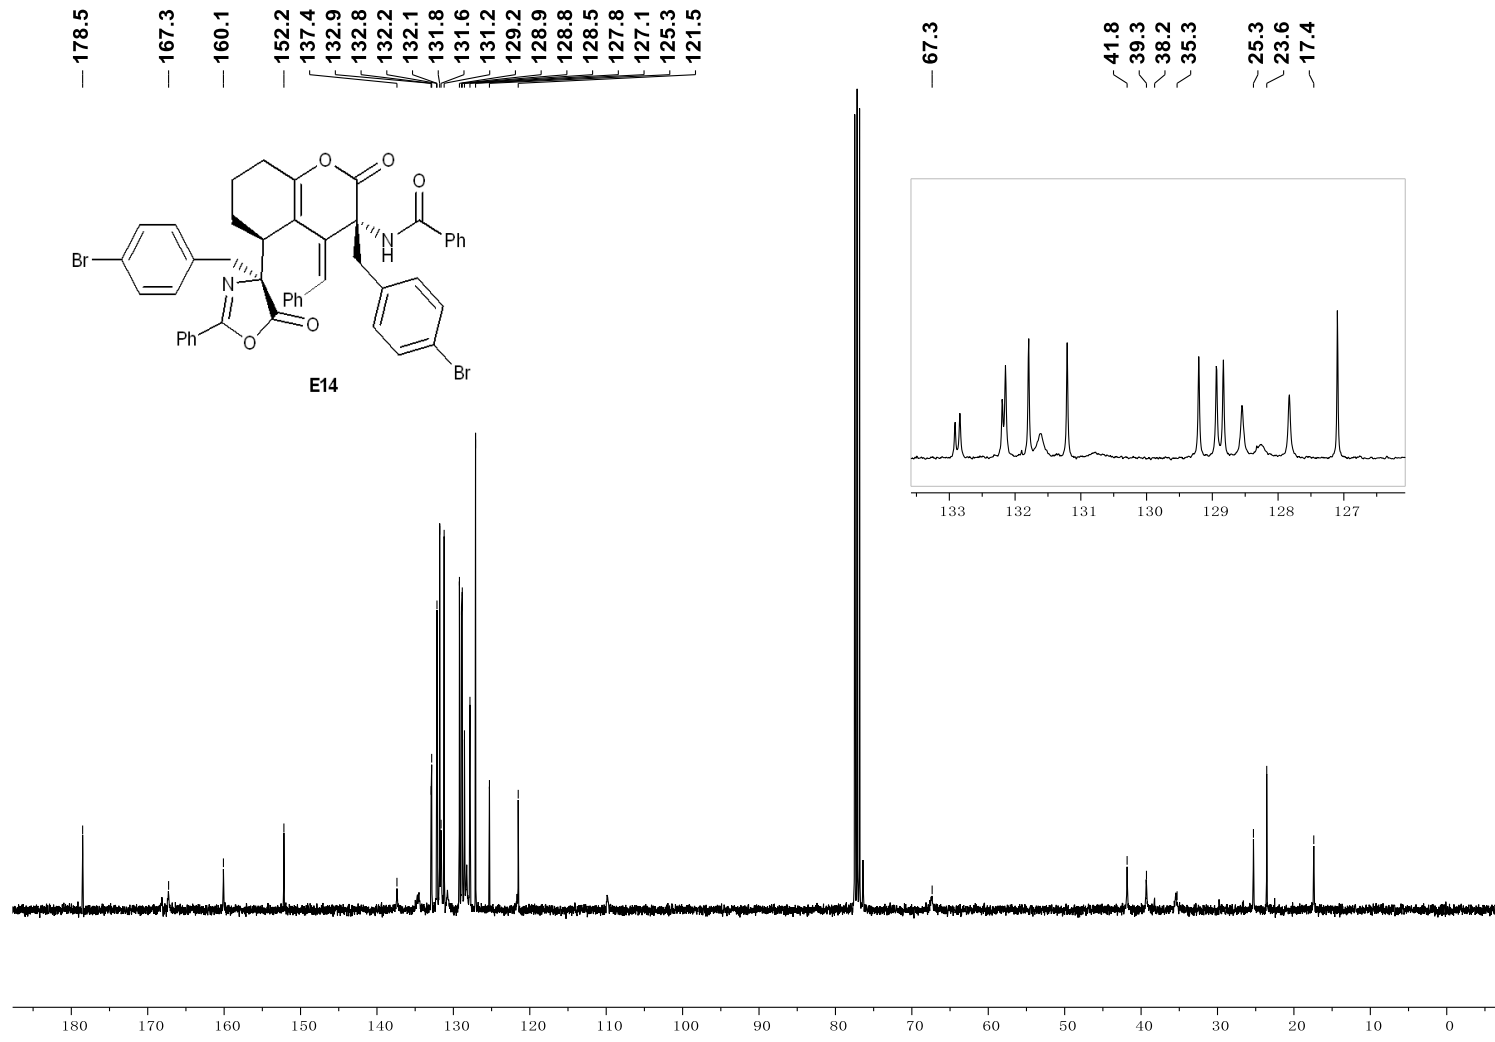

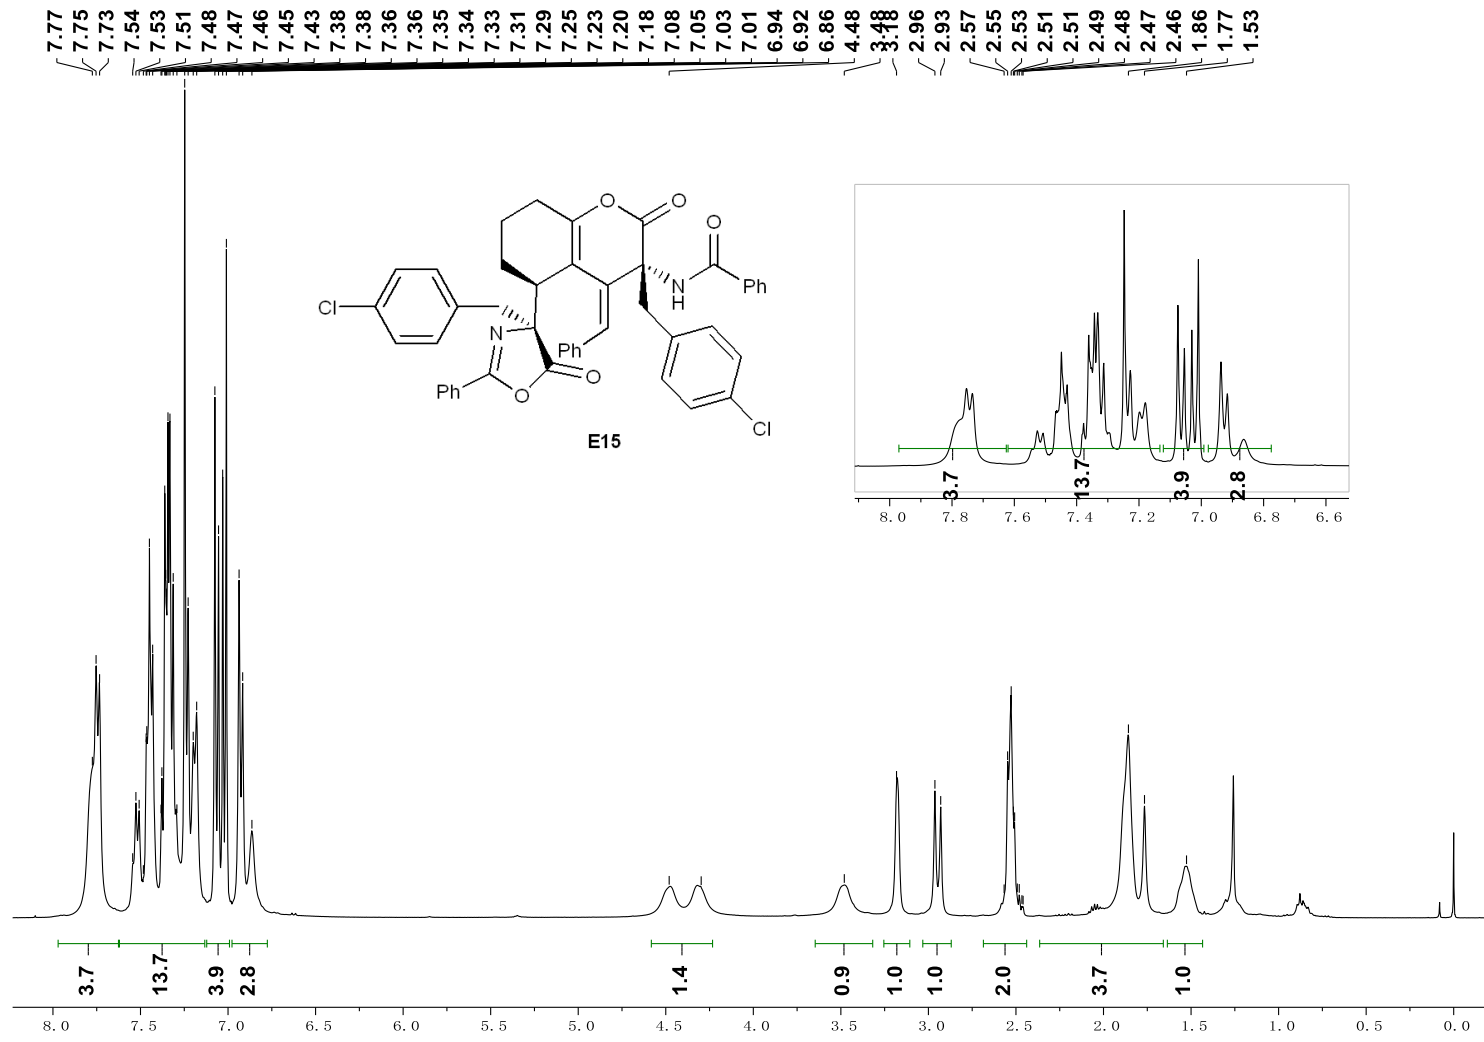

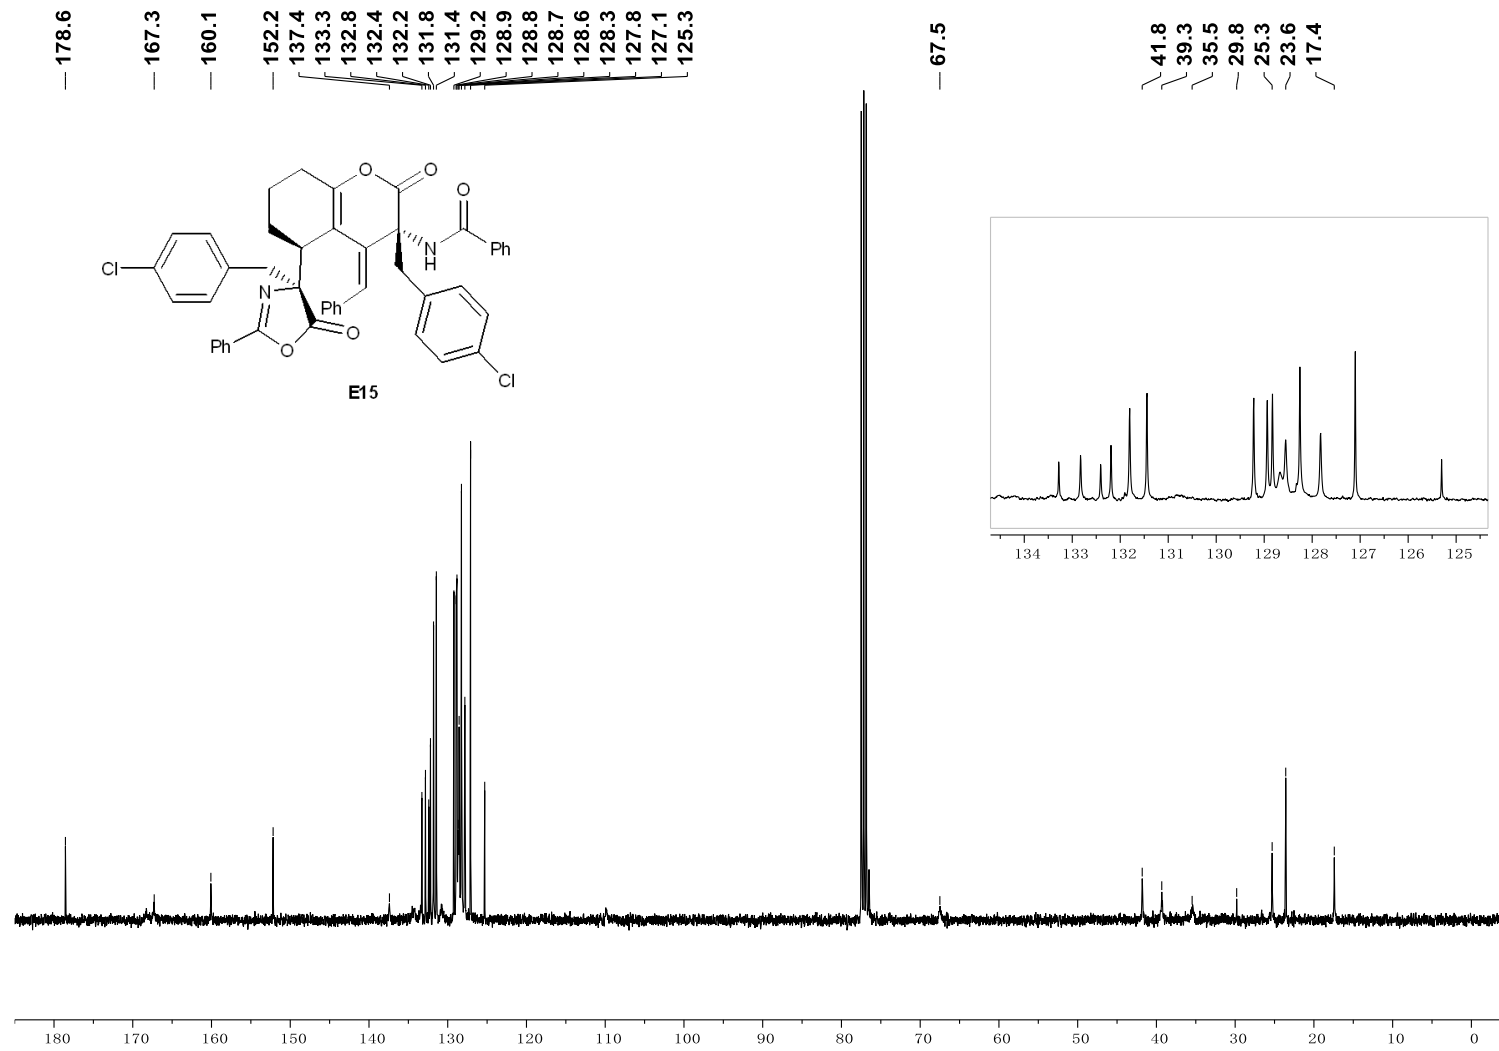

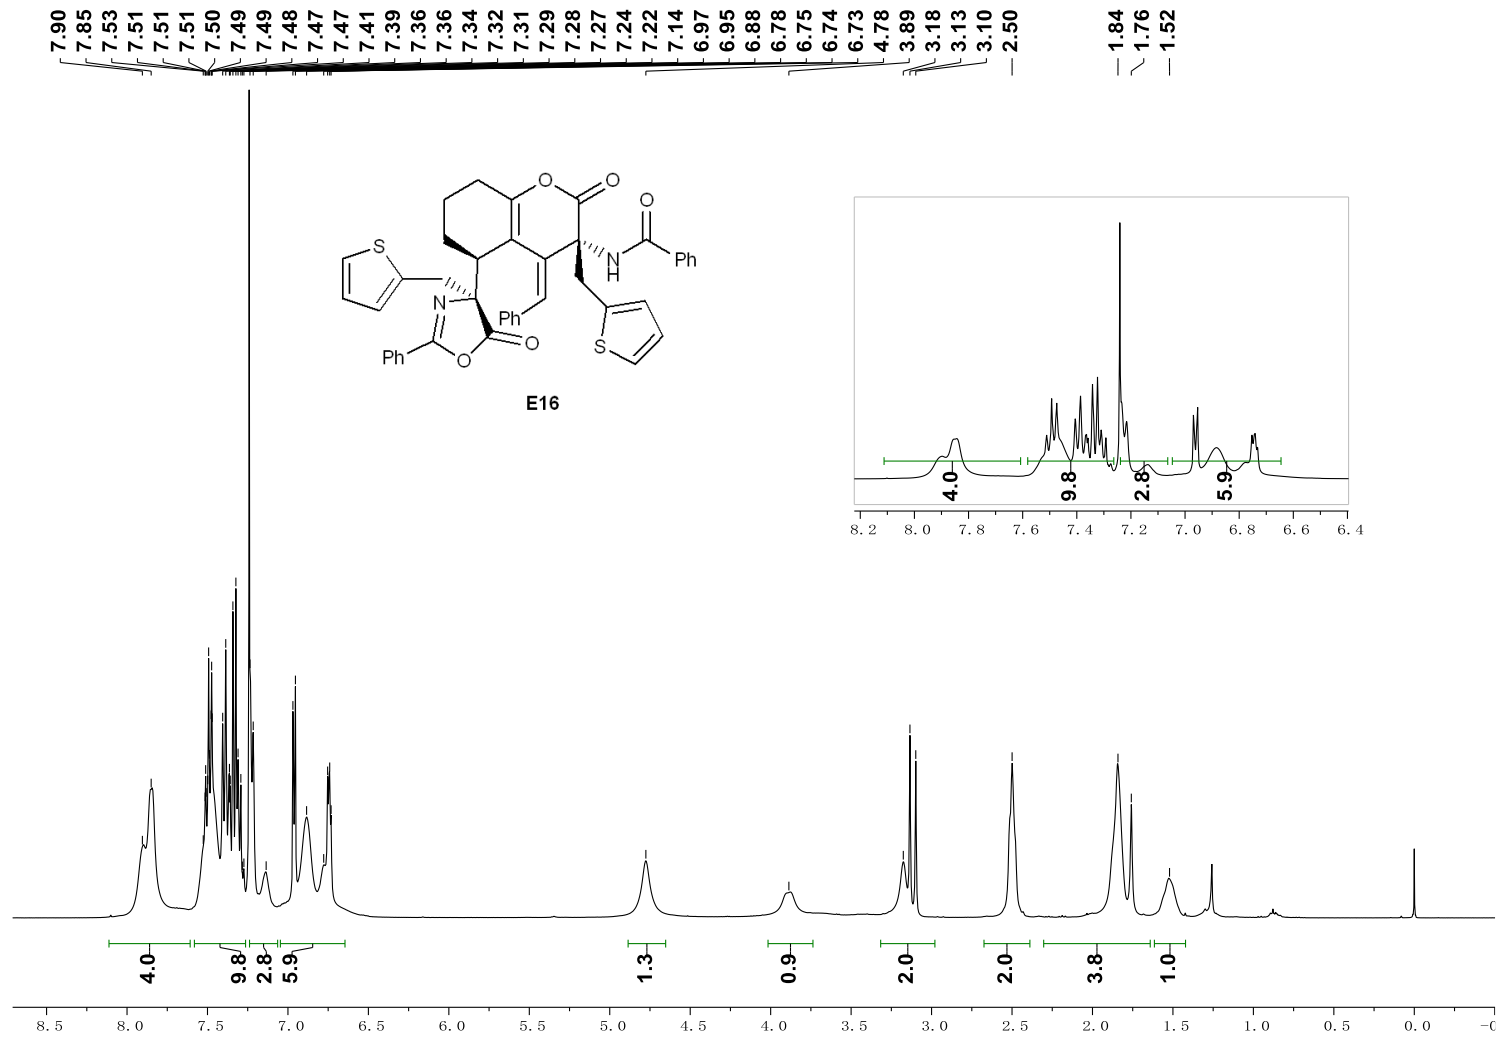

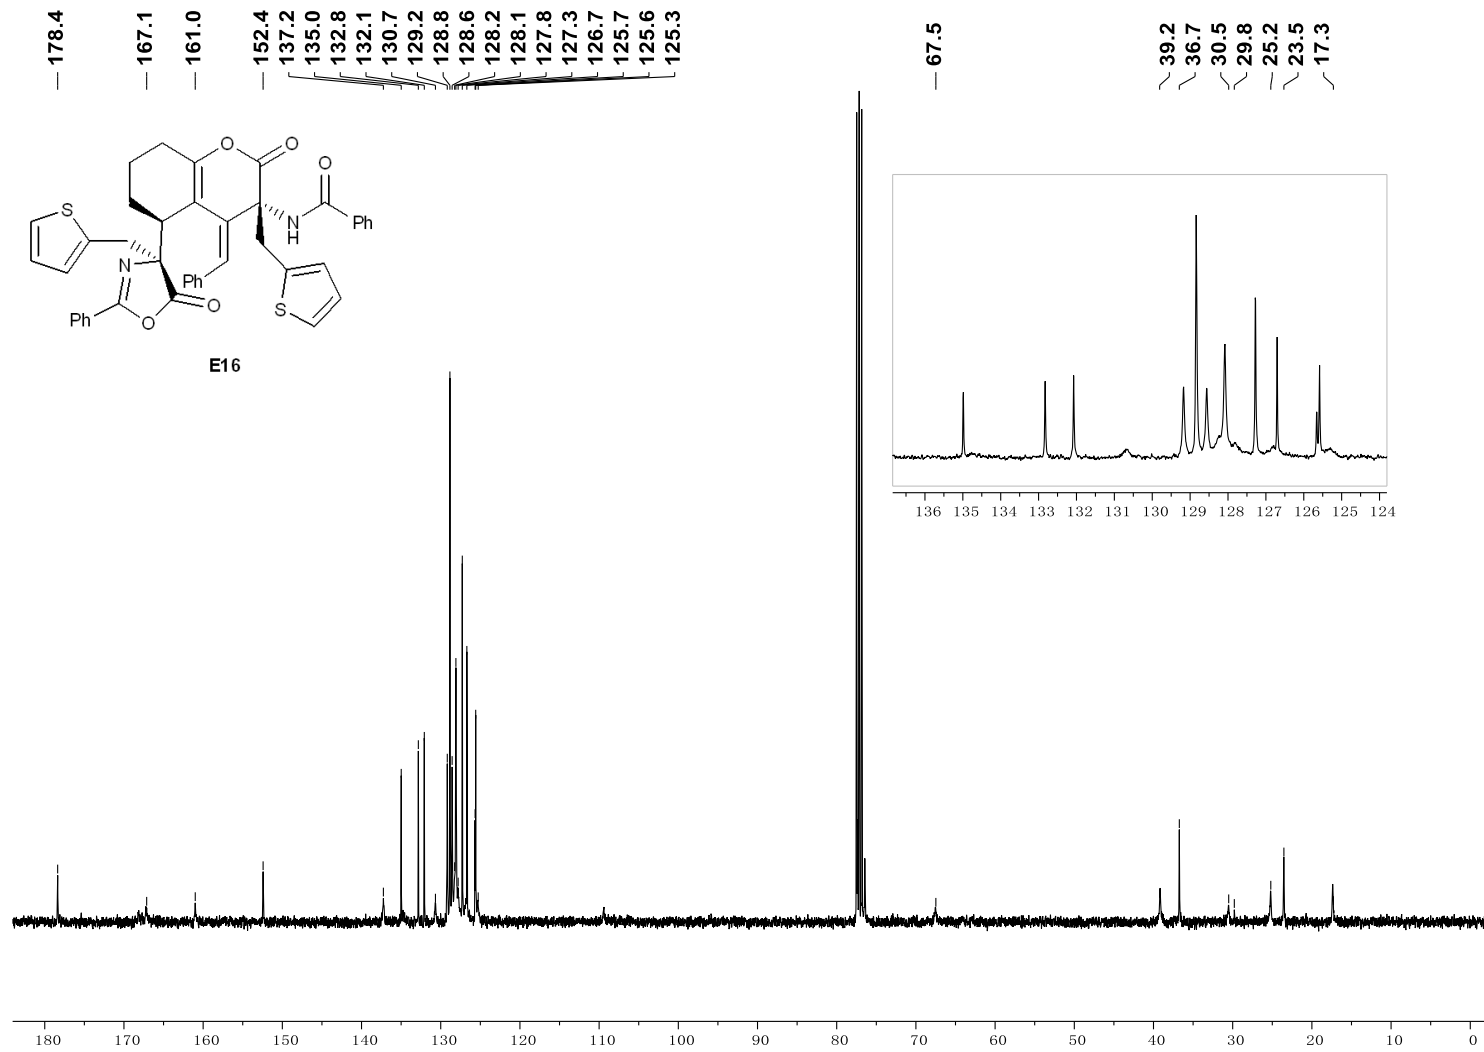



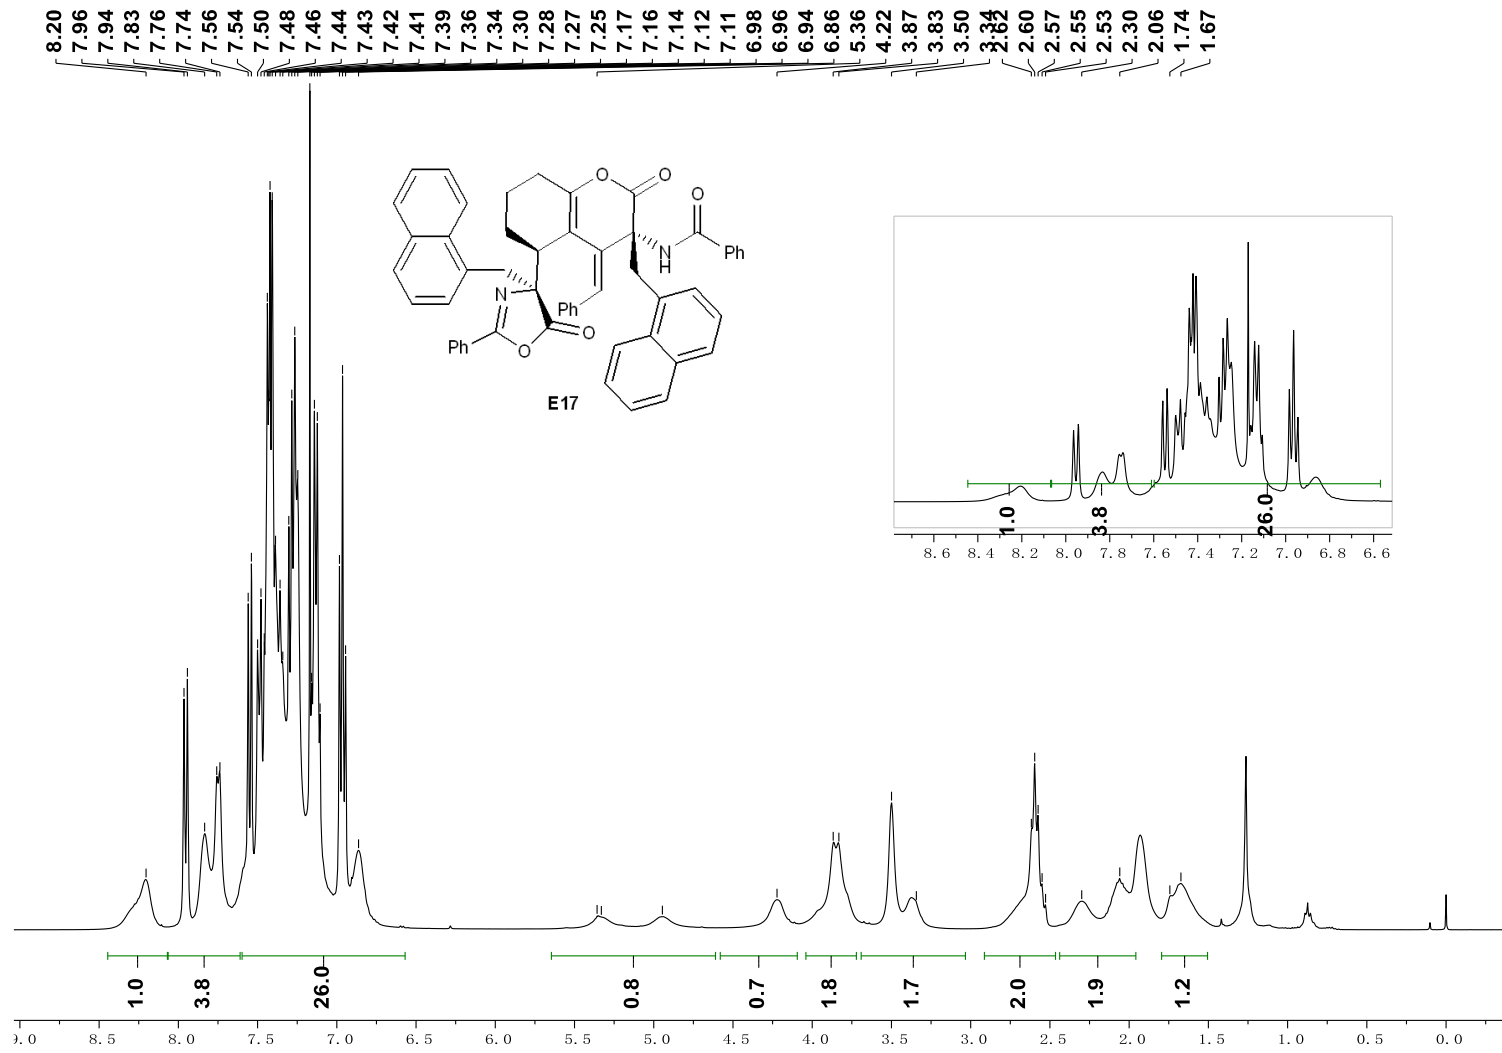

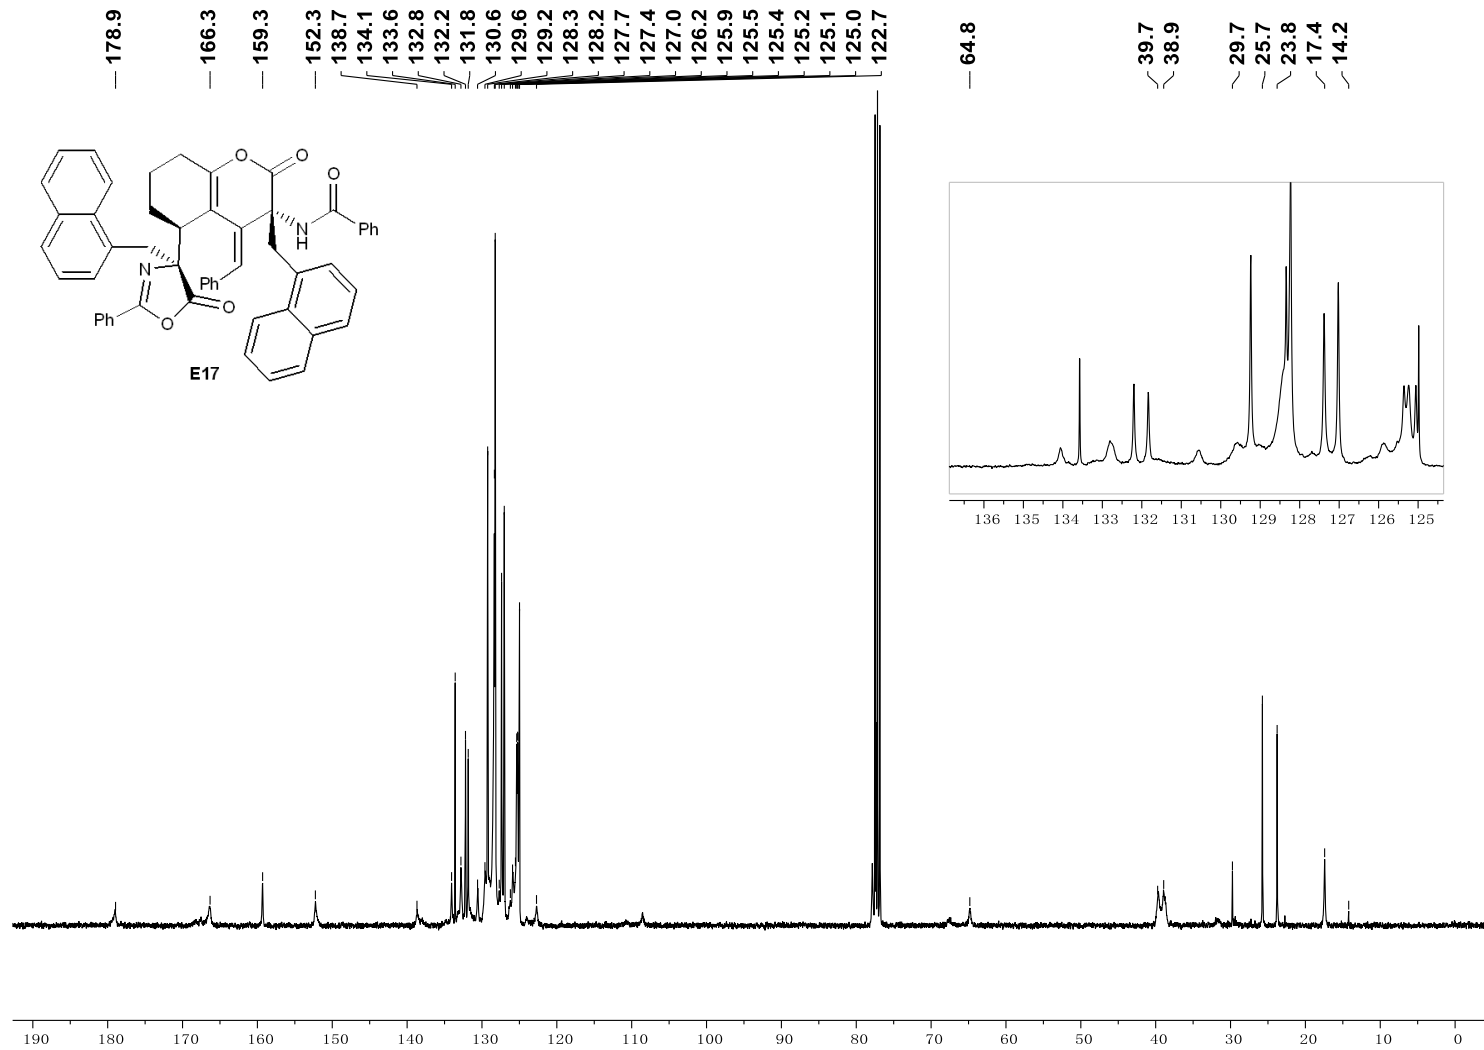

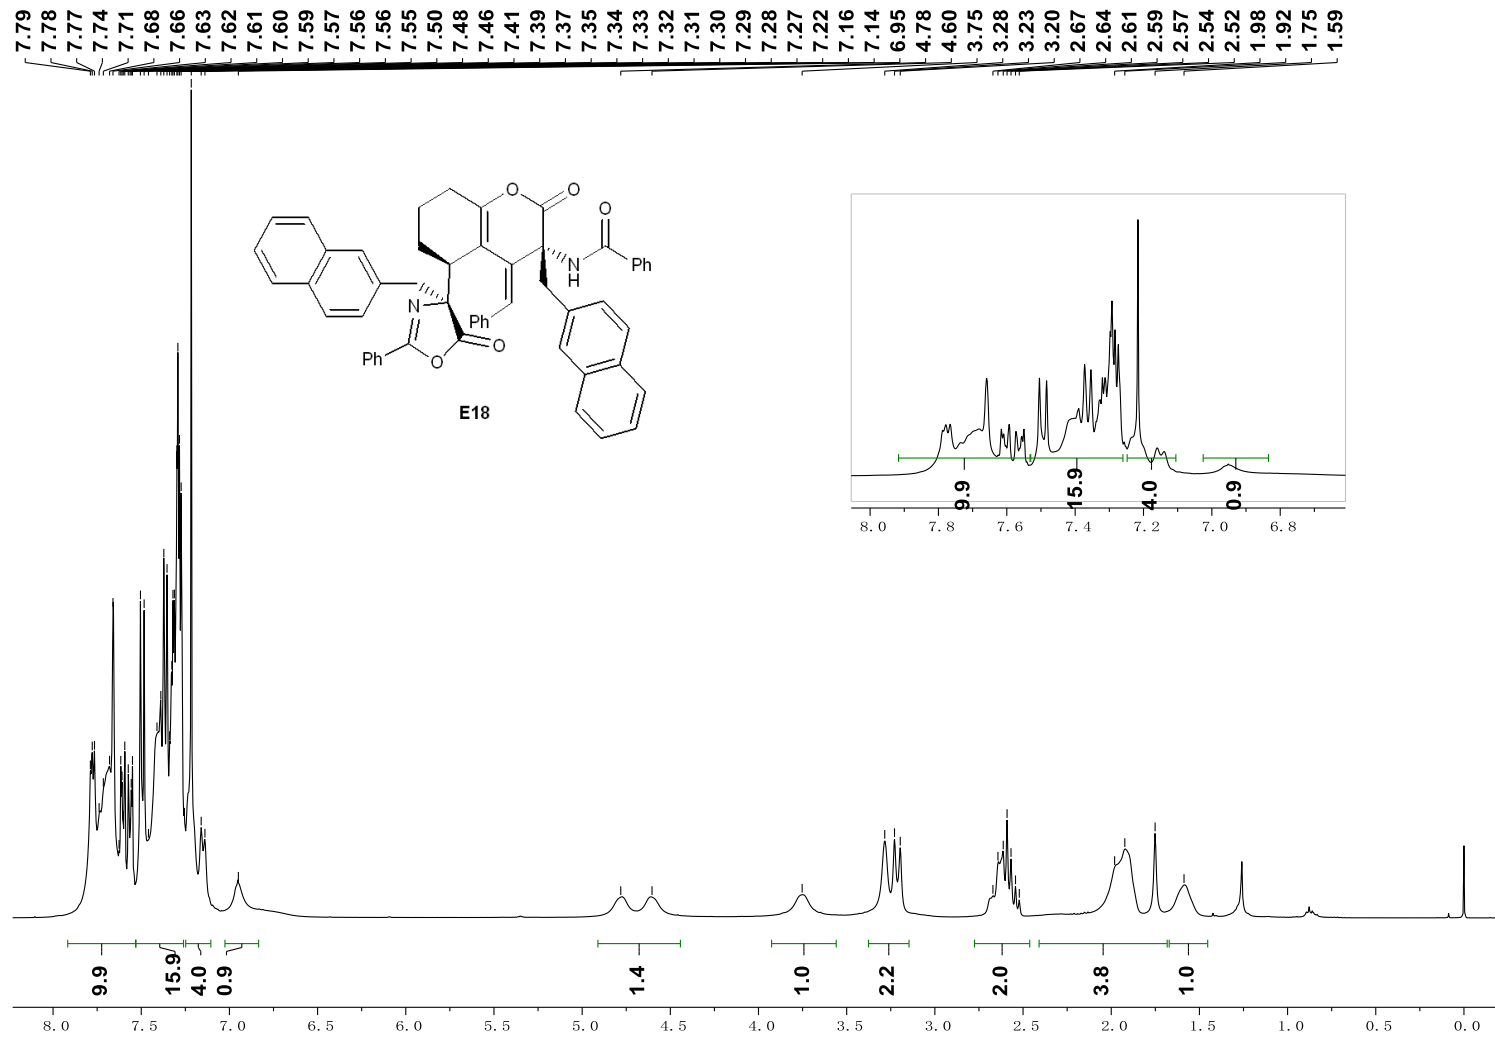

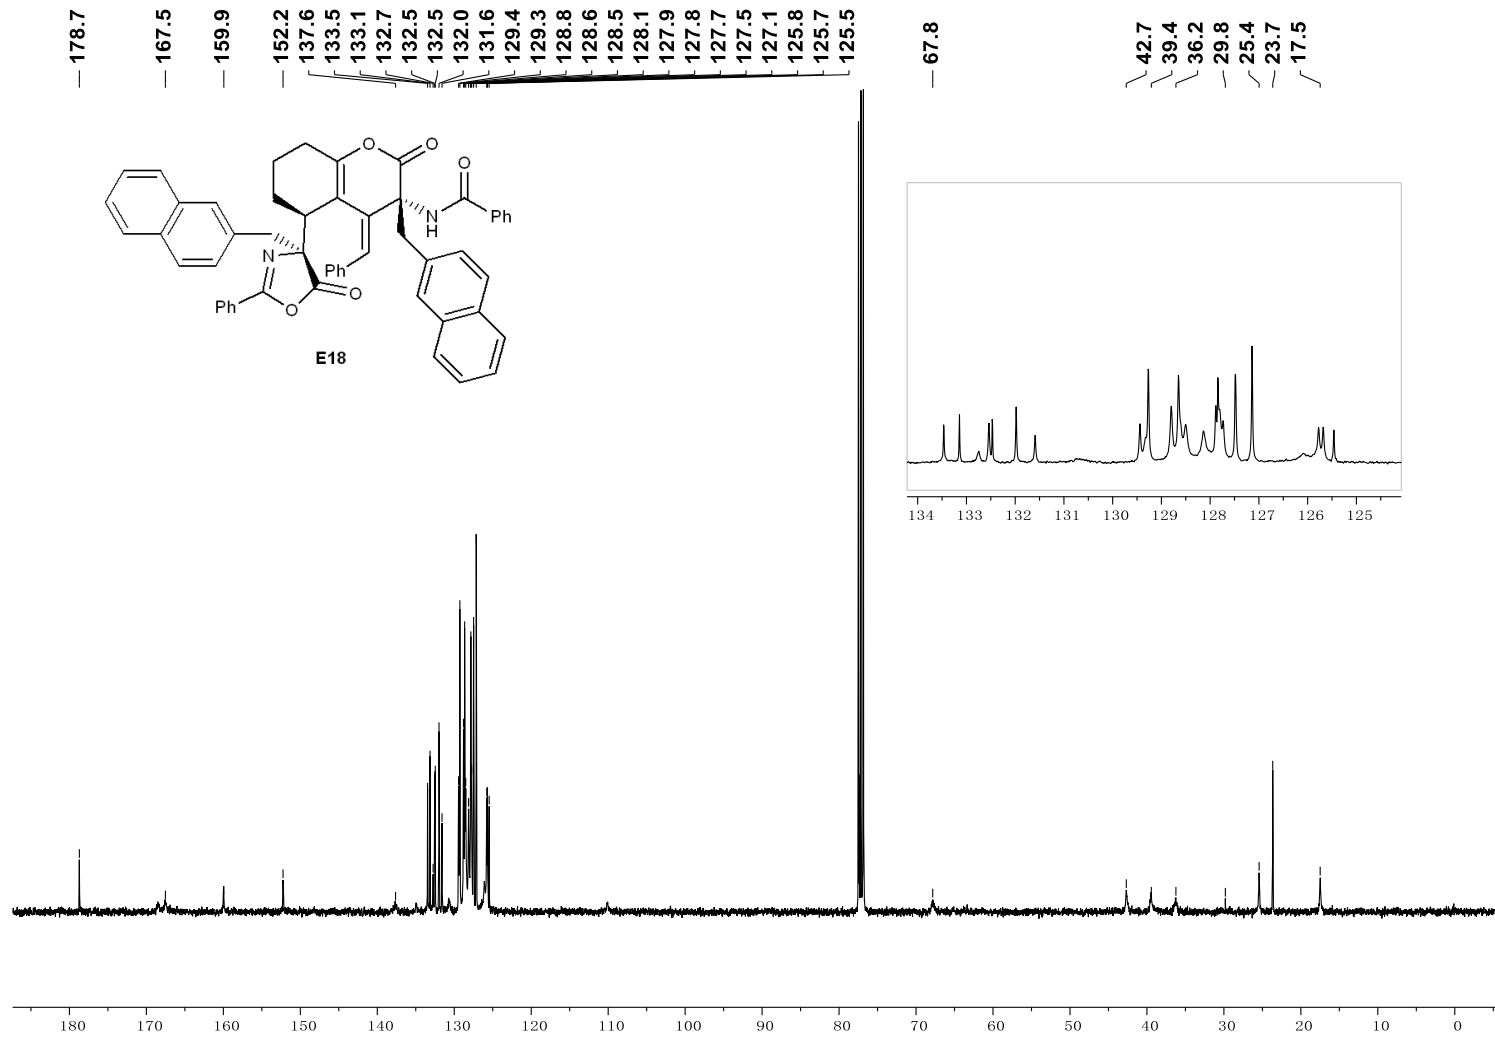

7.91  
7.89  
7.79  
7.77  
7.57  
7.55  
7.53  
7.51  
7.50  
7.48  
7.47  
7.45  
7.43  
7.41  
7.39  
7.33  
7.32  
7.30  
7.26  
7.25  
7.24  
7.22  
6.61  
5.90  
5.40  
5.38  
5.37  
5.35  
5.34  
5.32  
5.31  
5.29  
5.04  
5.00  
4.98  
4.96  
3.05  
2.75  
2.47  
2.44  
2.42  
2.41  
2.40  
2.37  
2.35  
2.18  
2.14  
1.87  
1.84  
1.83

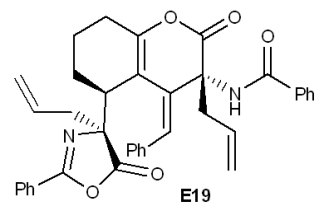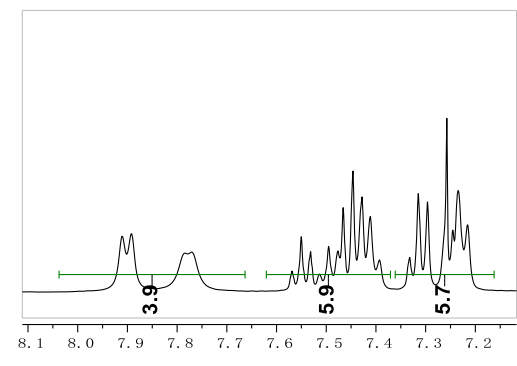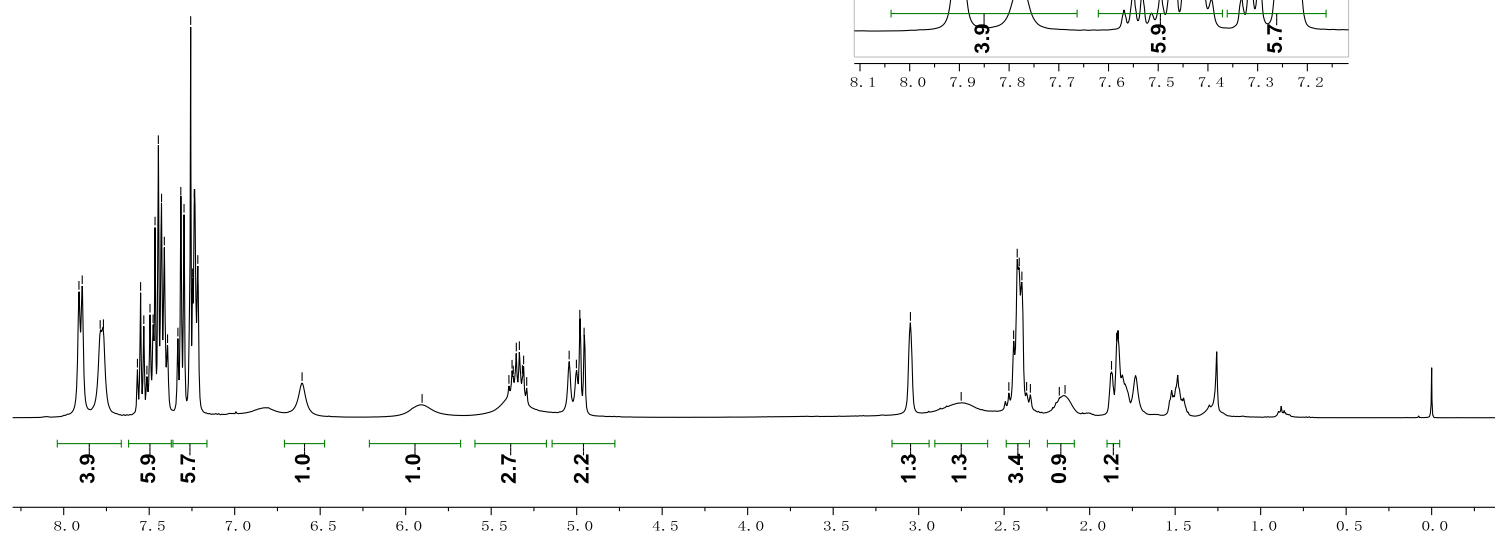

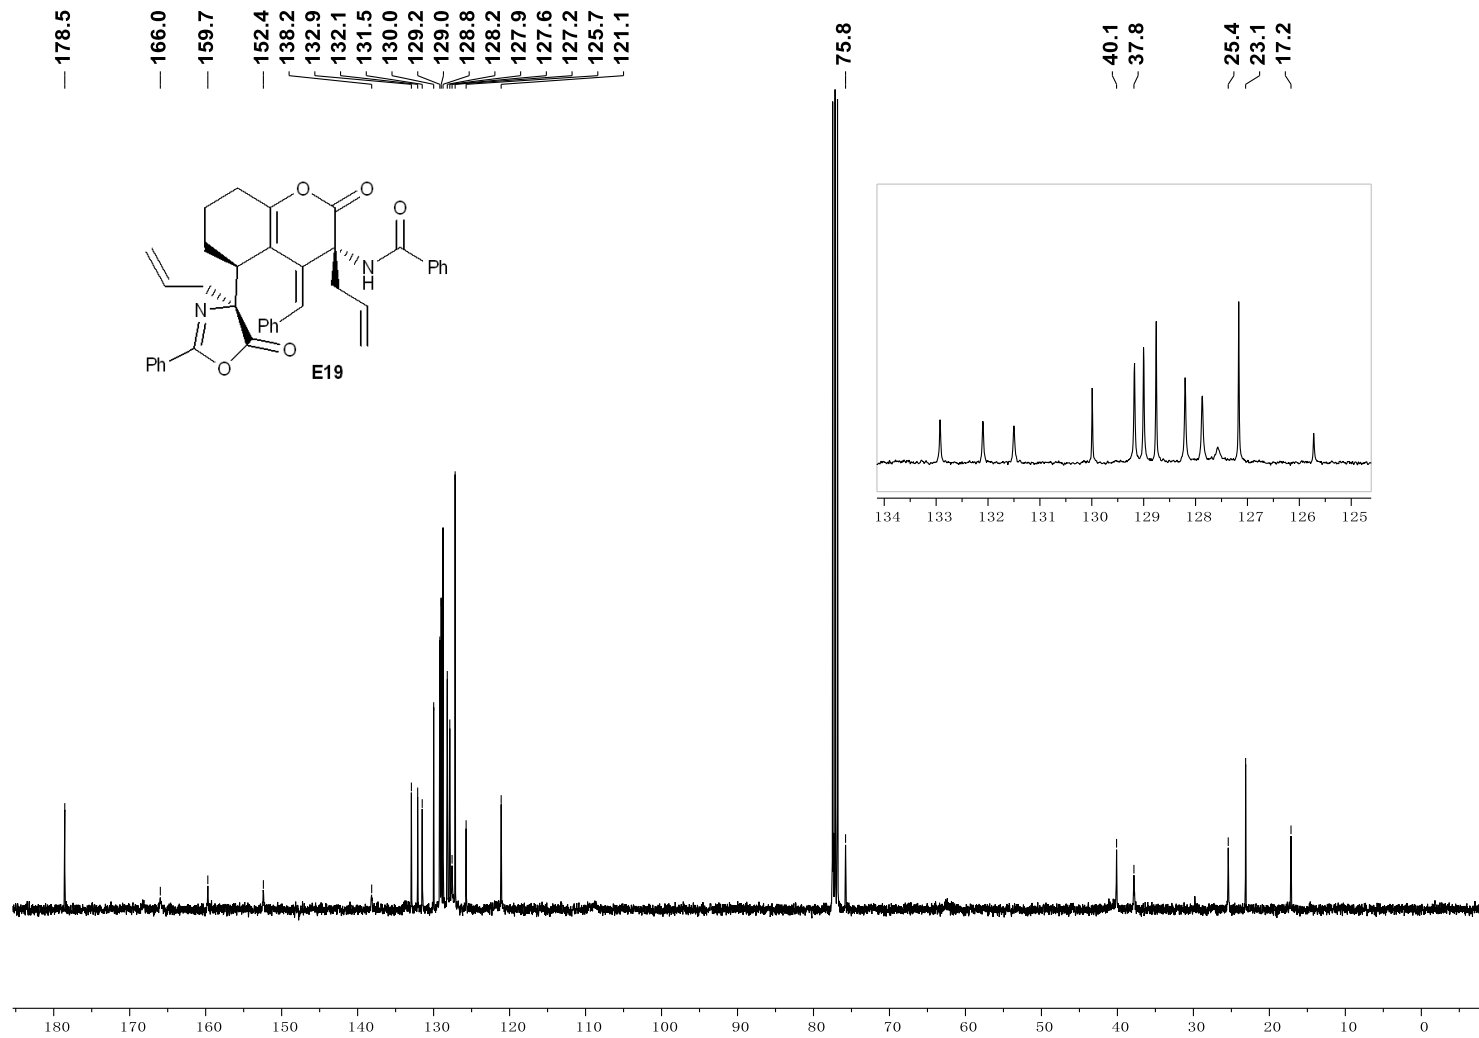

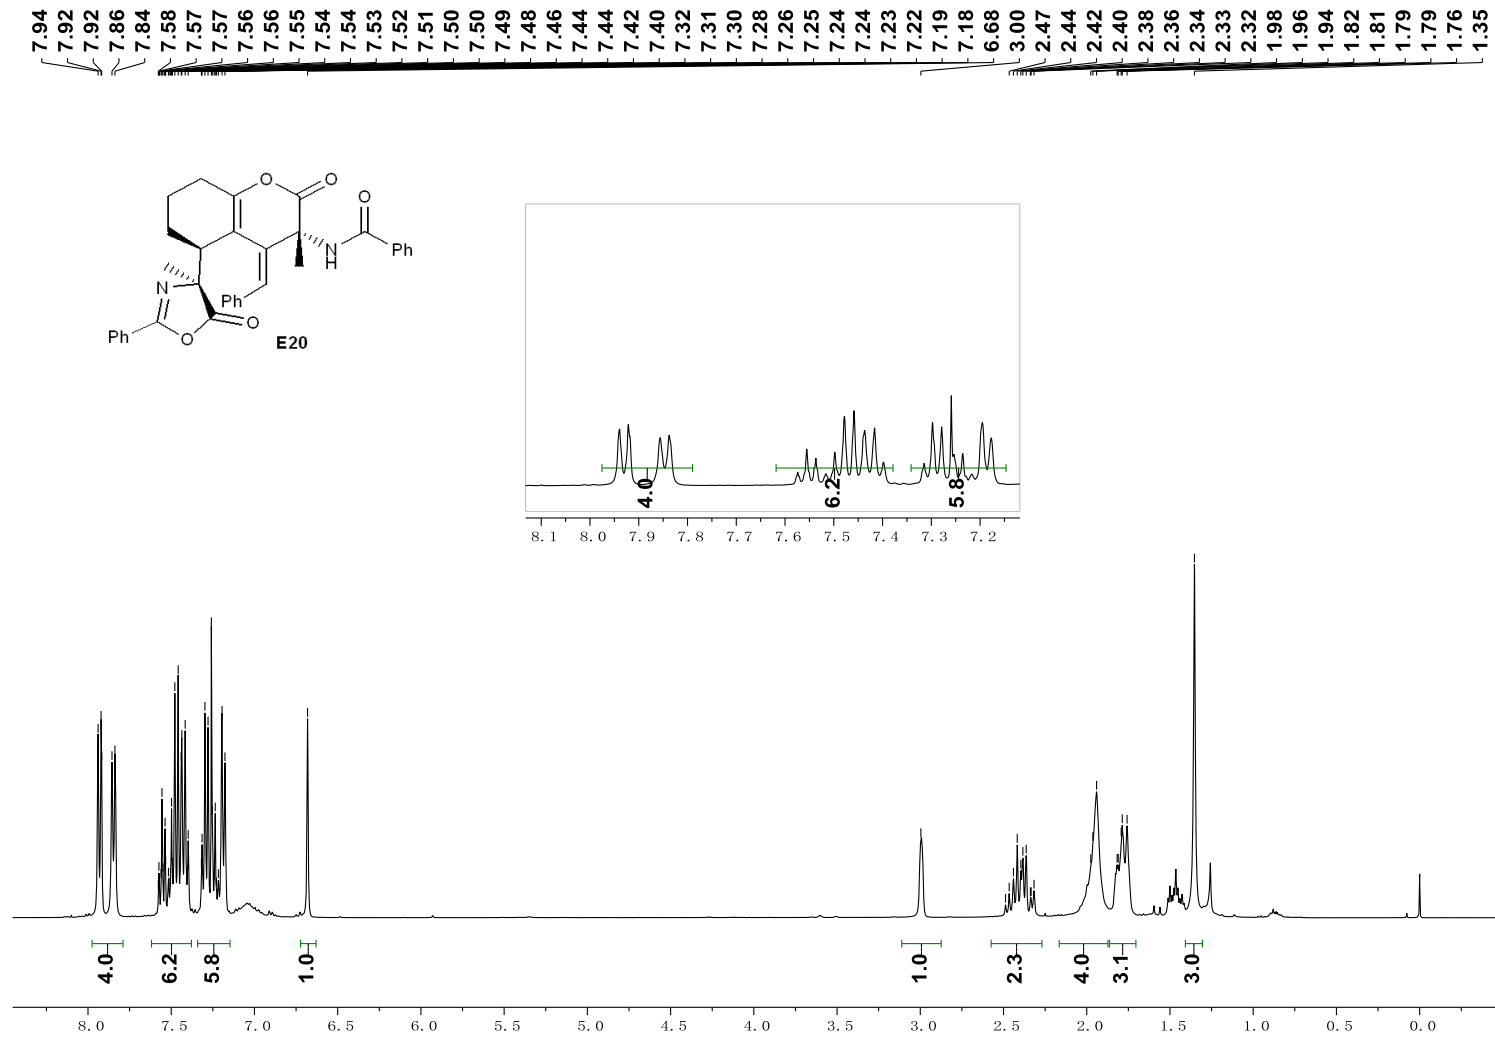

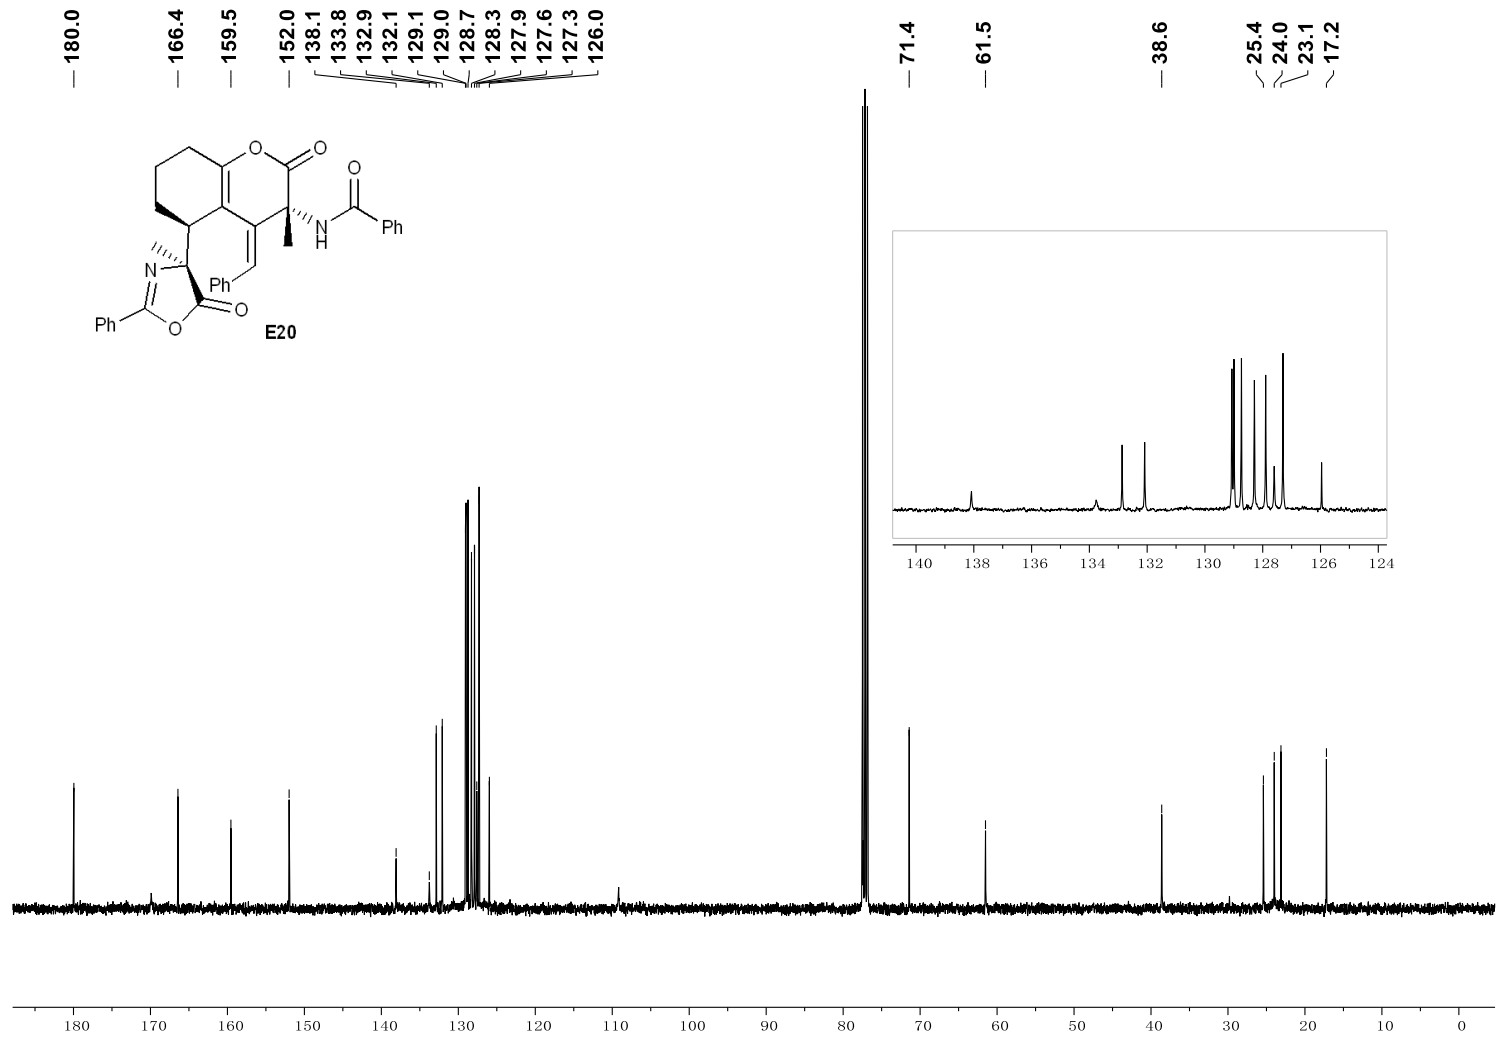



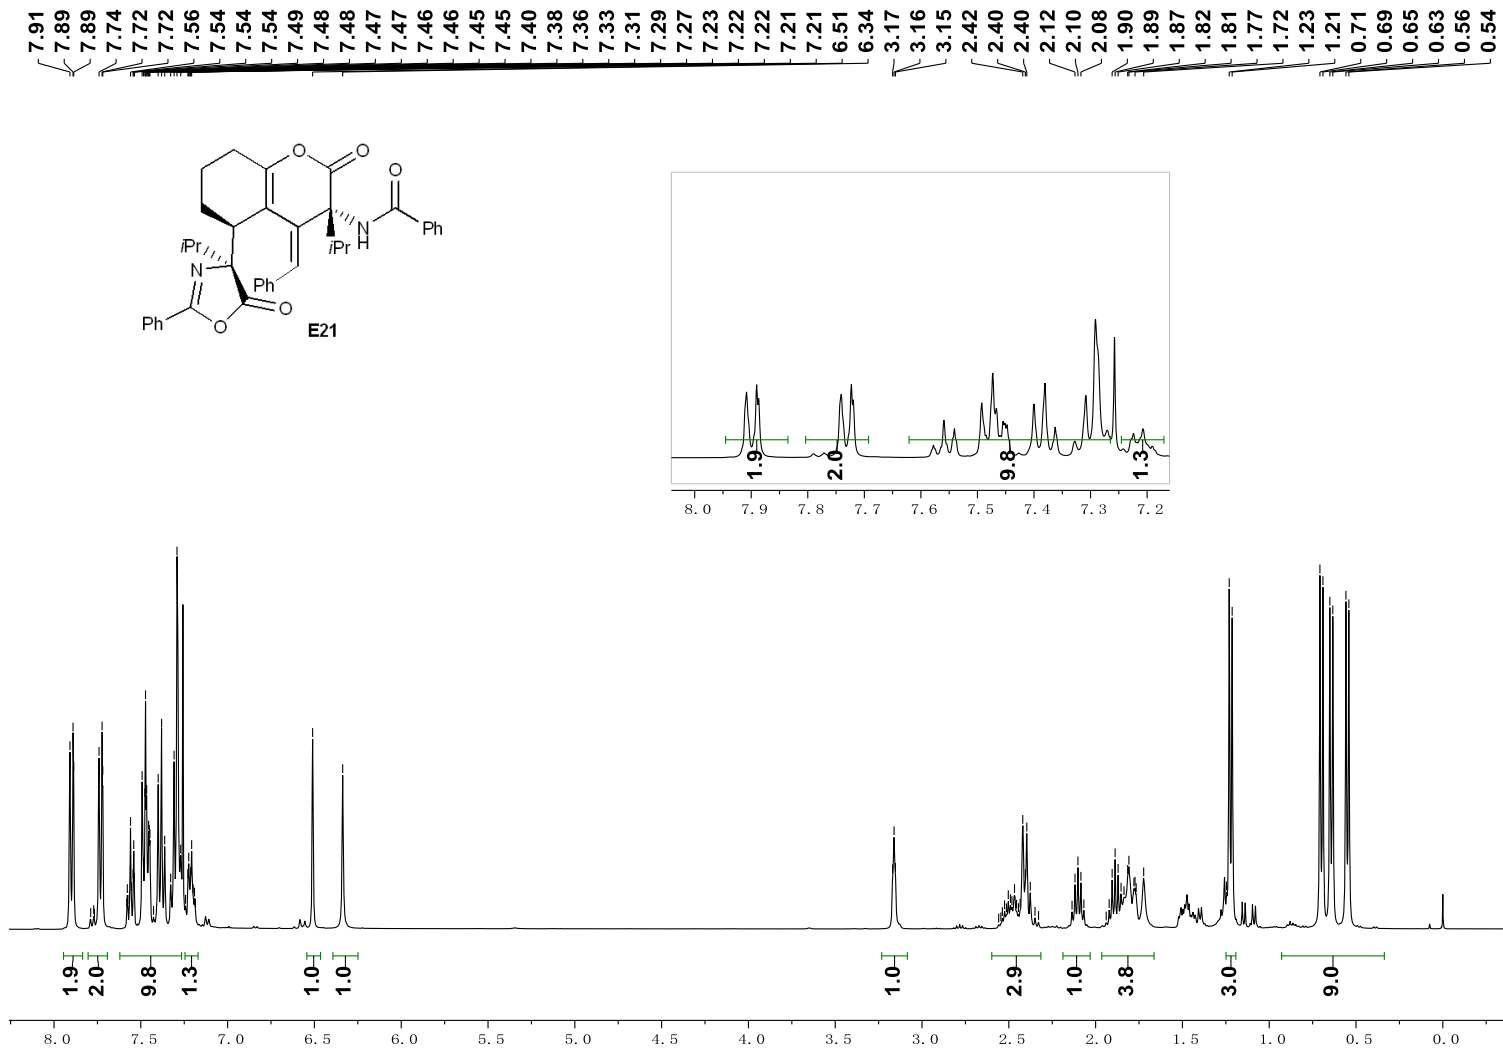

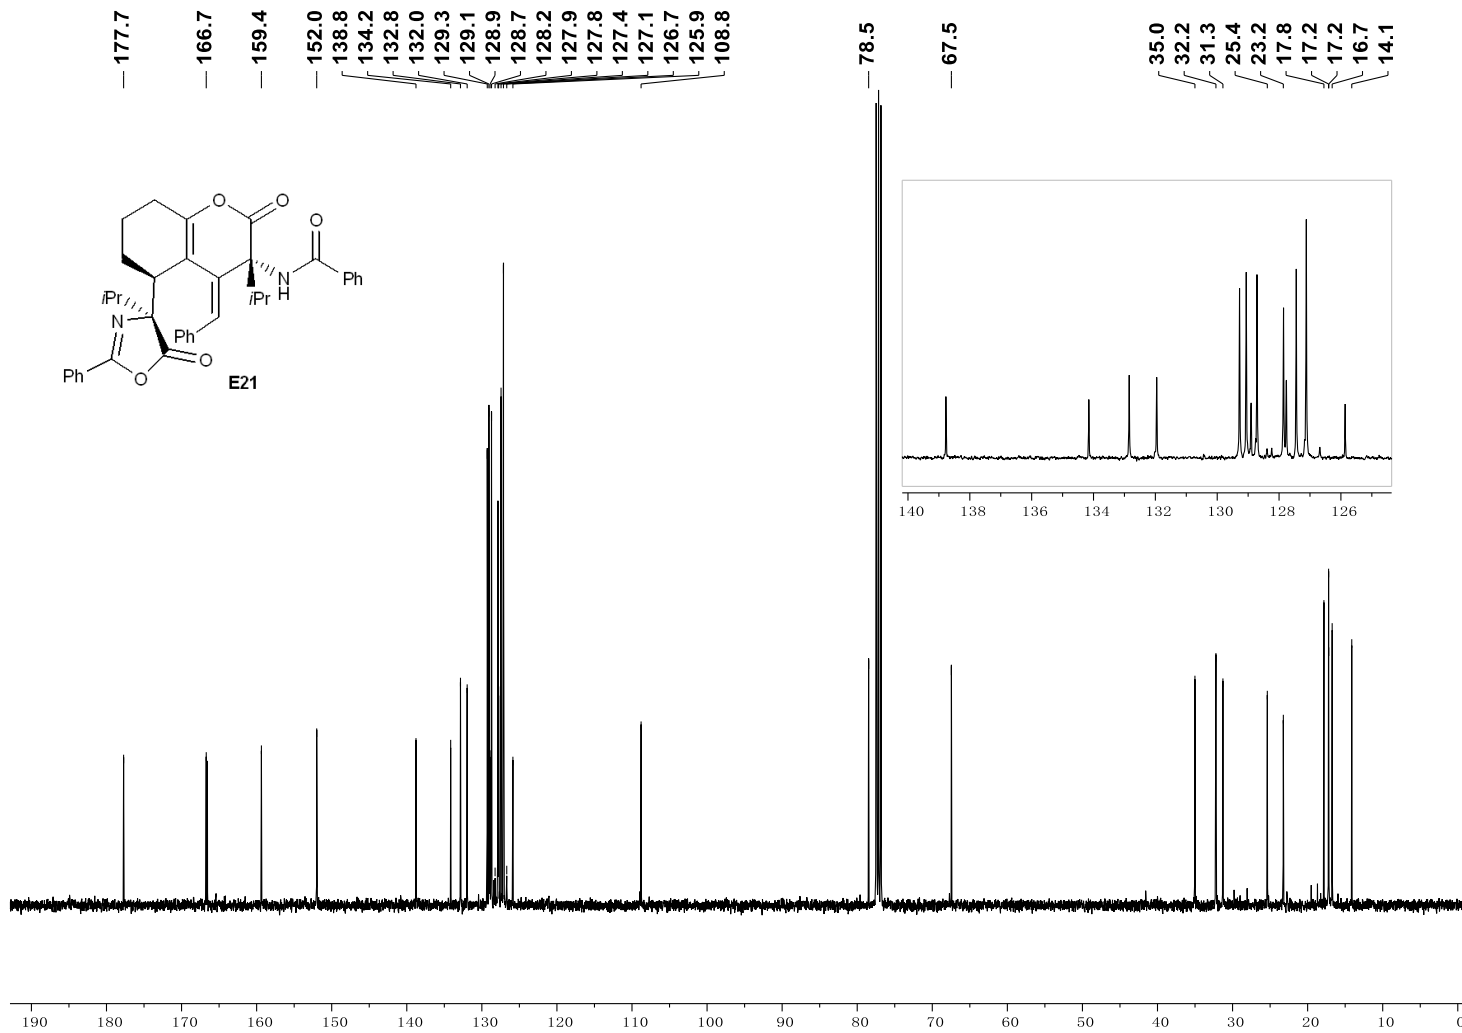

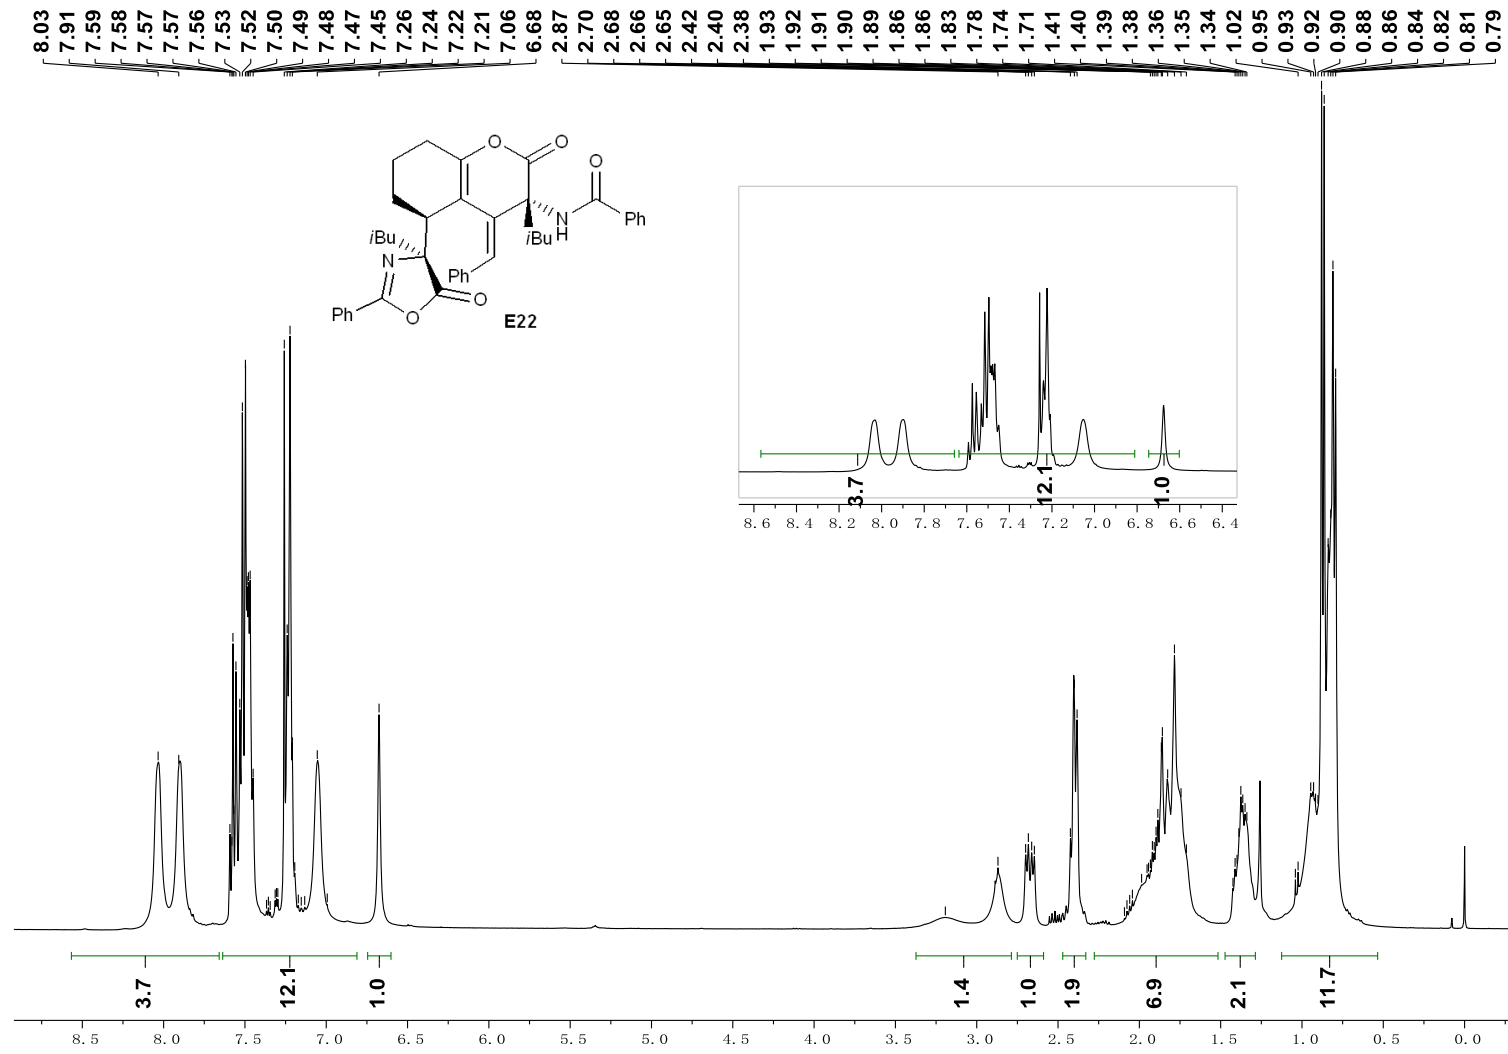

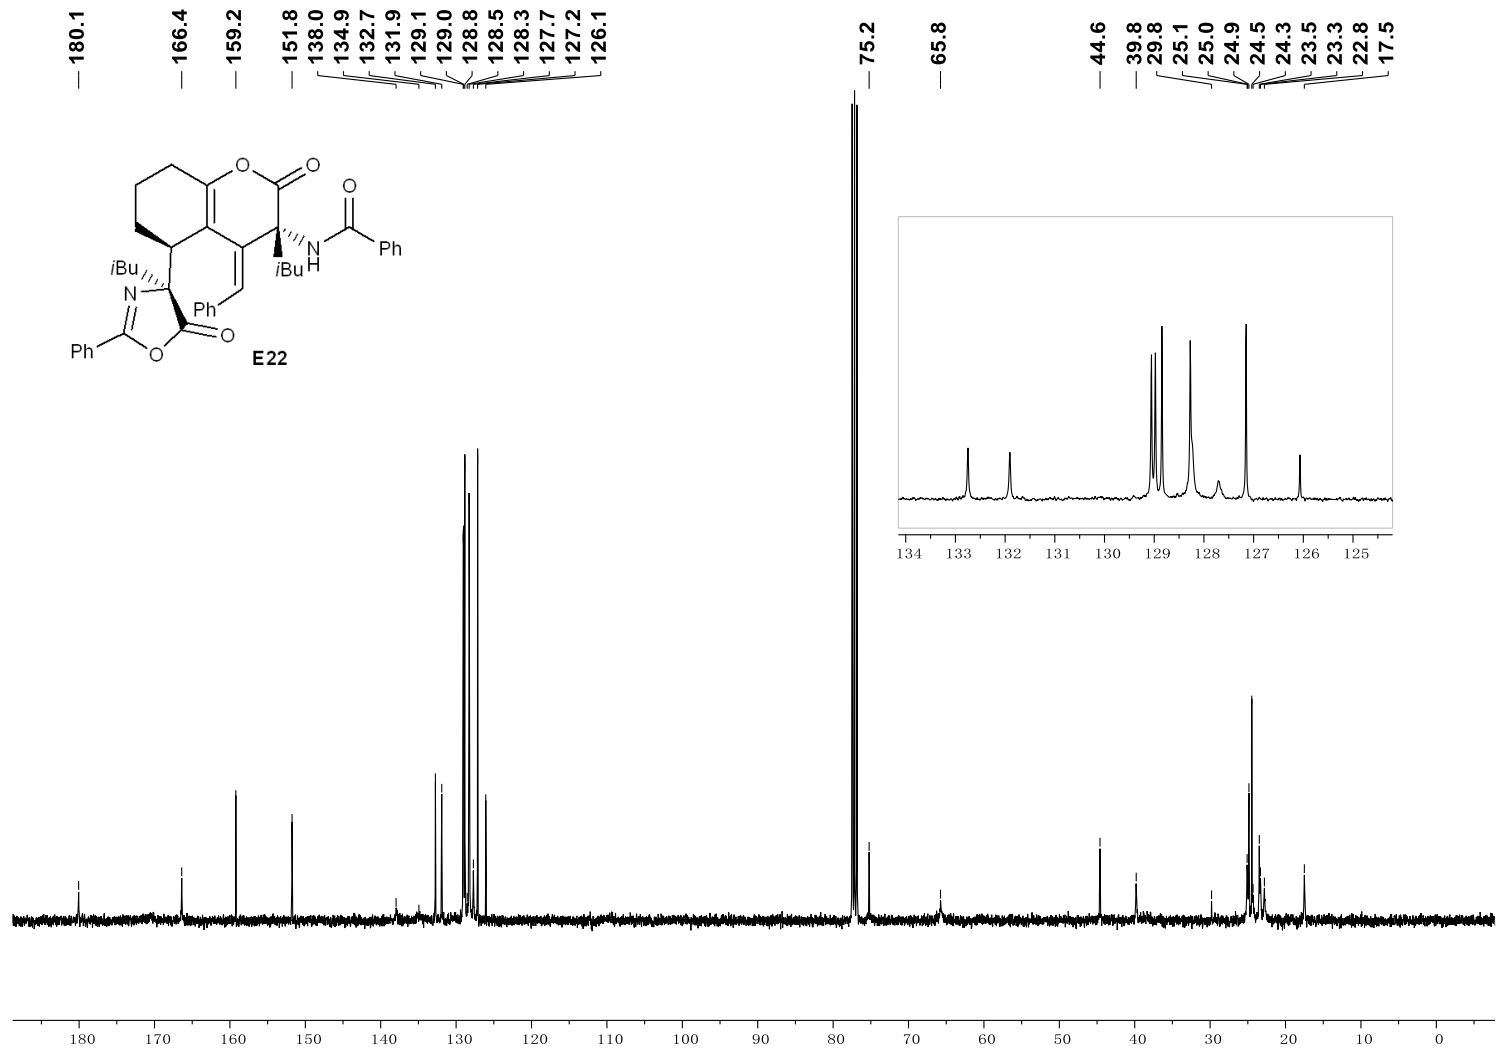

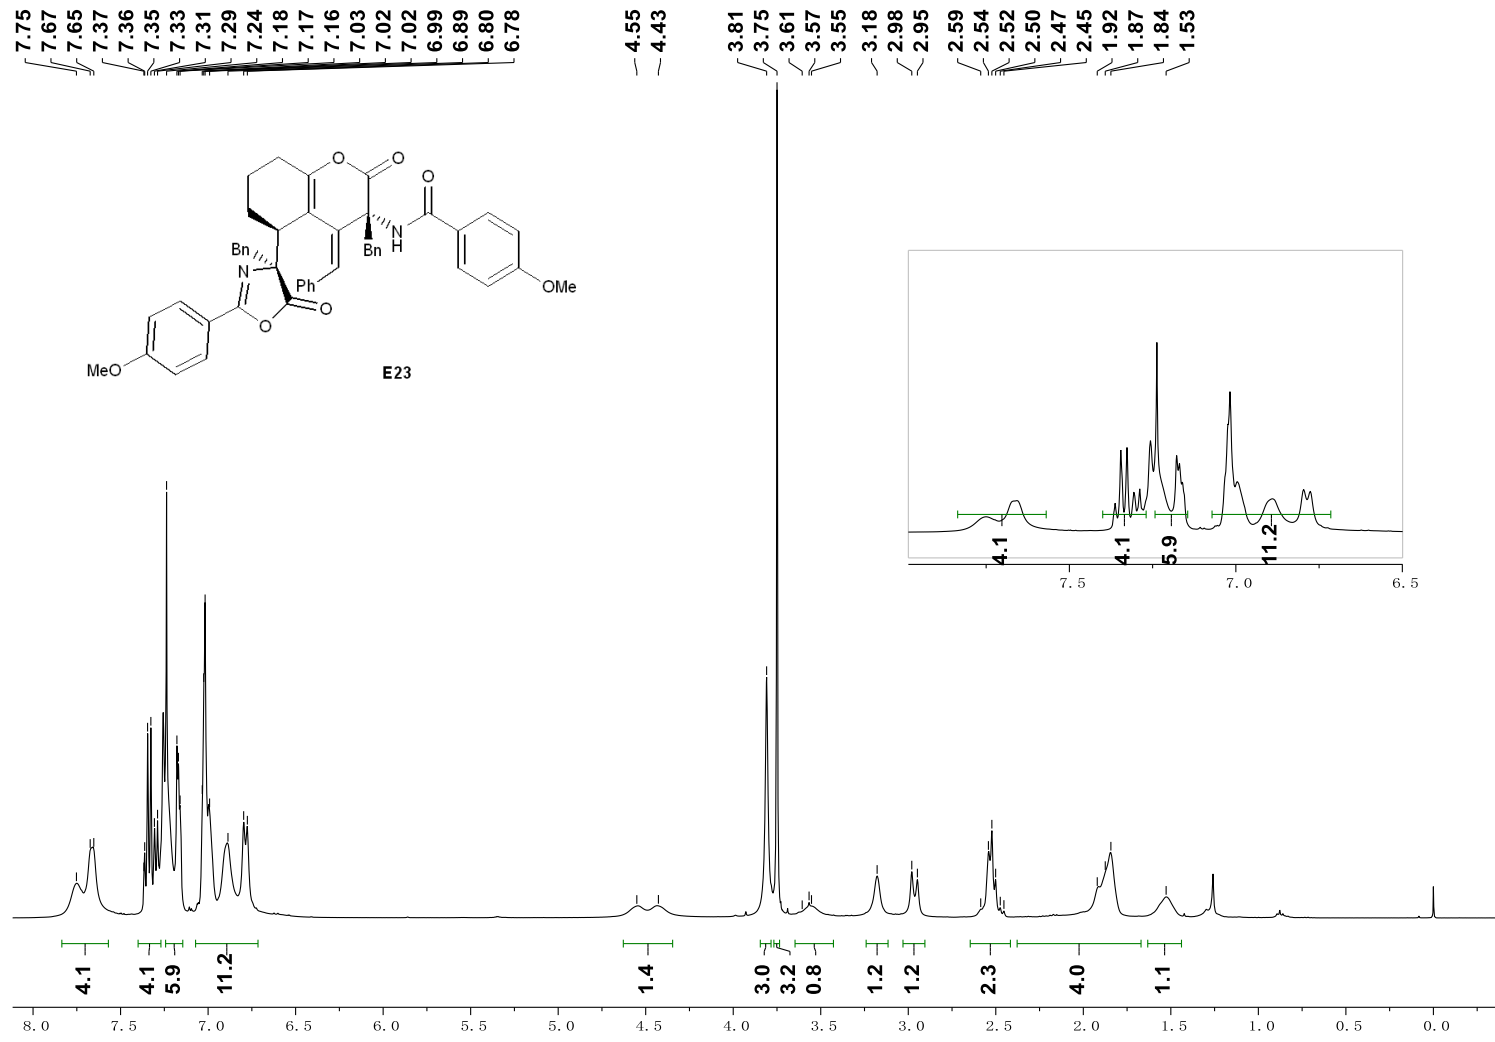

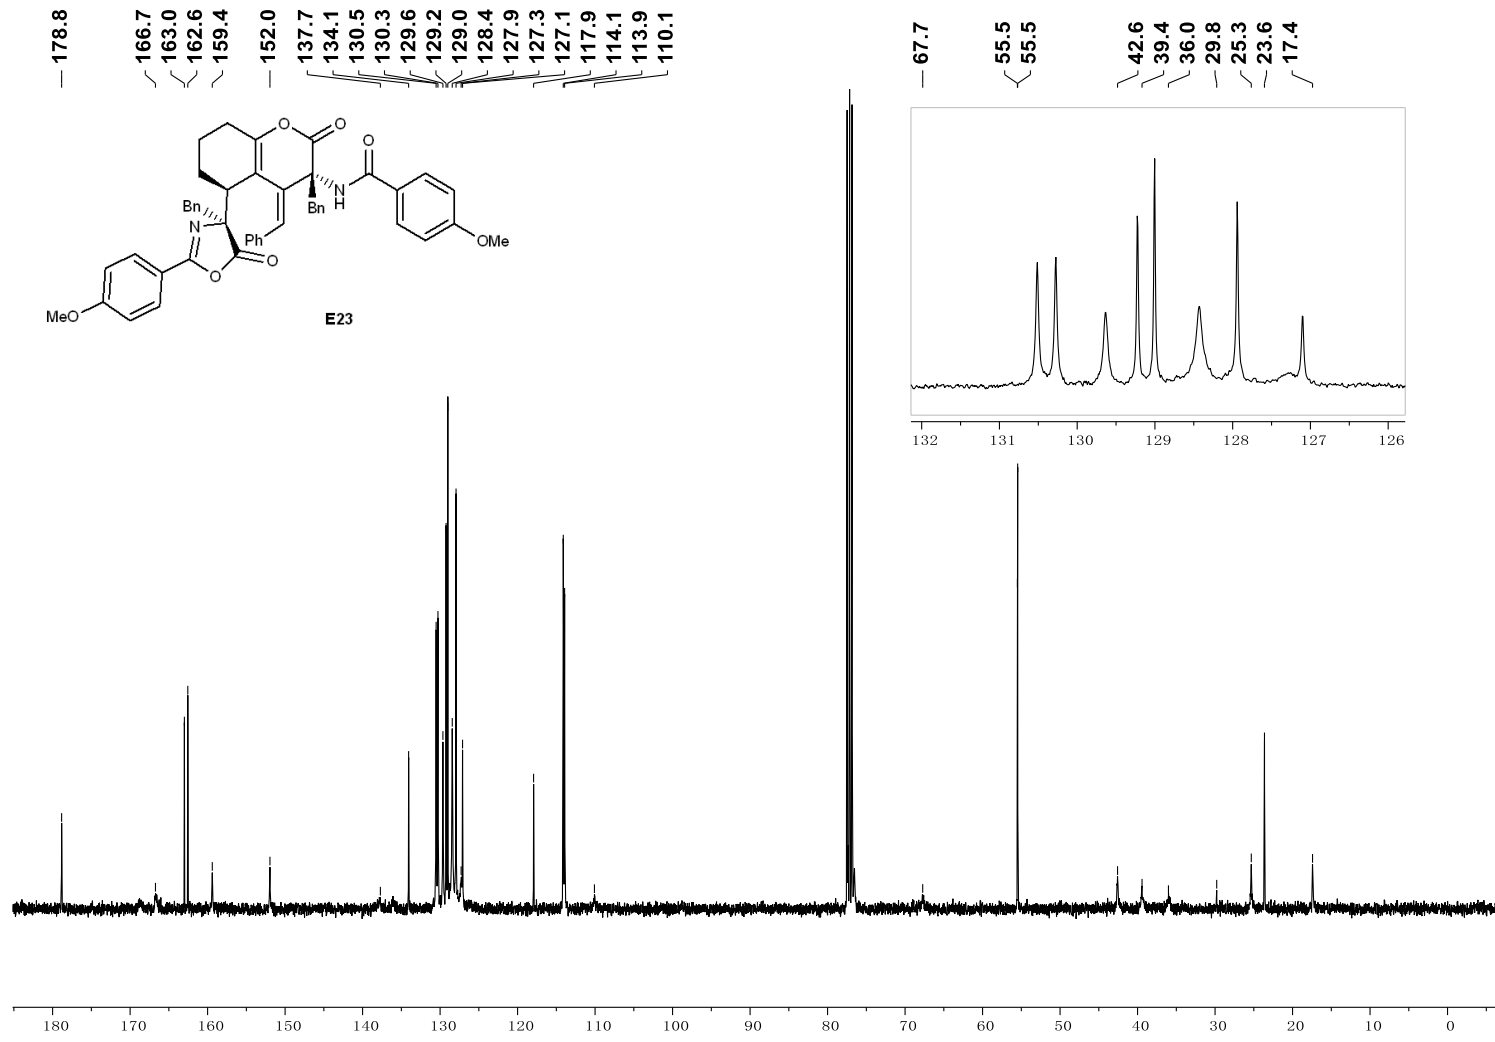

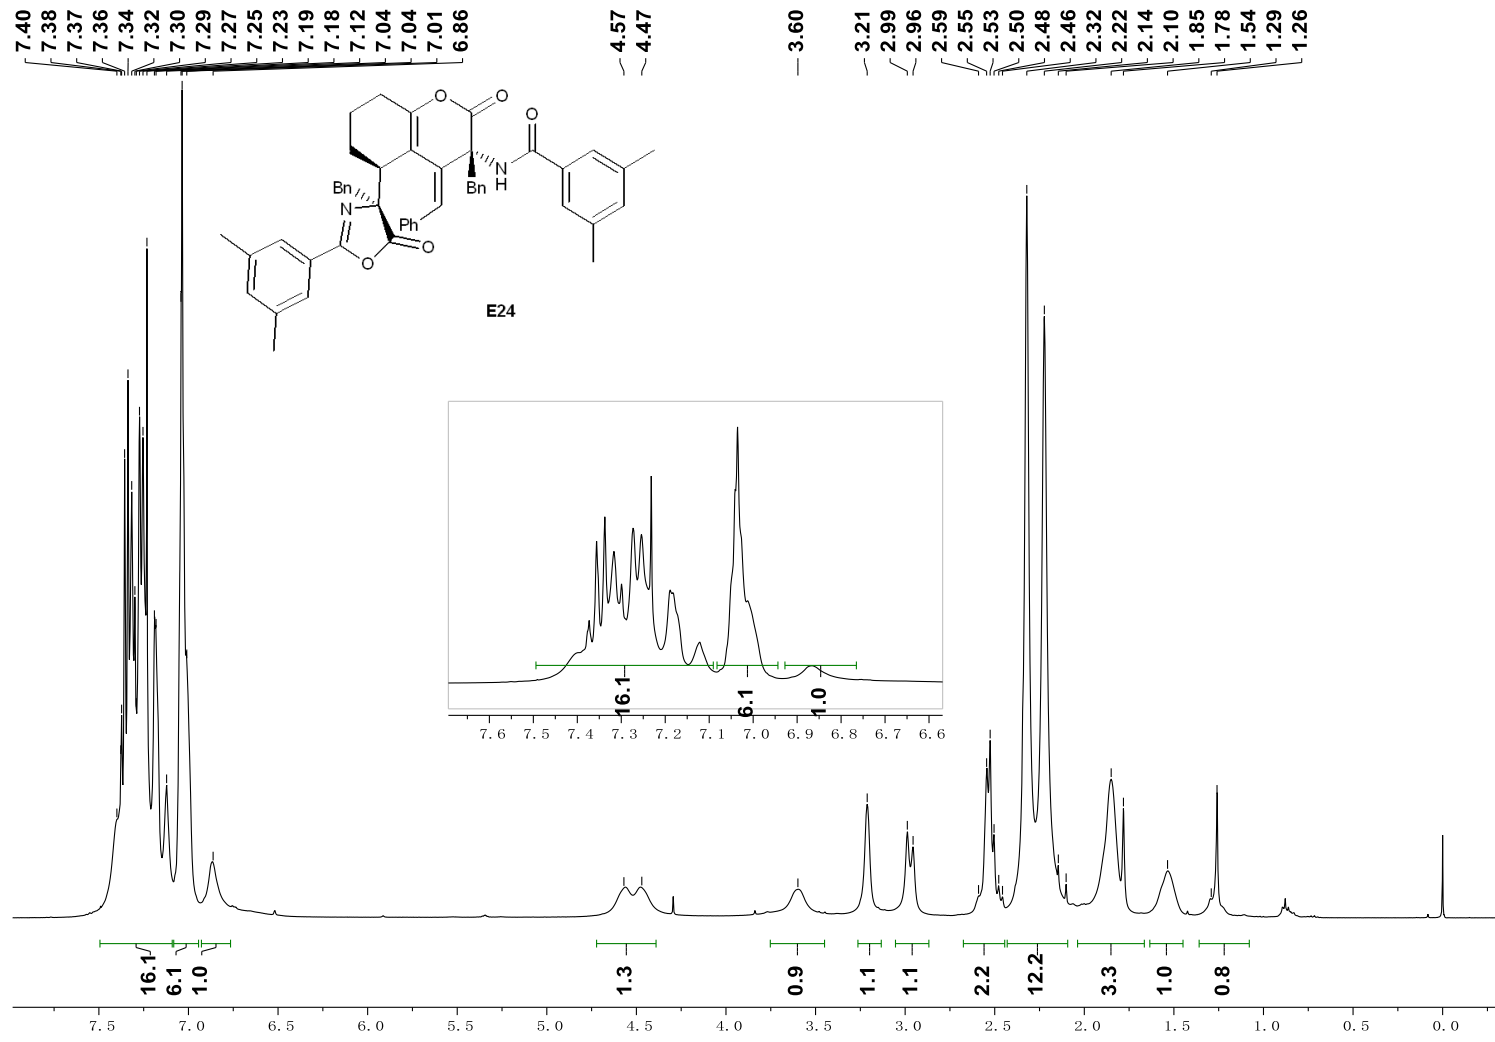

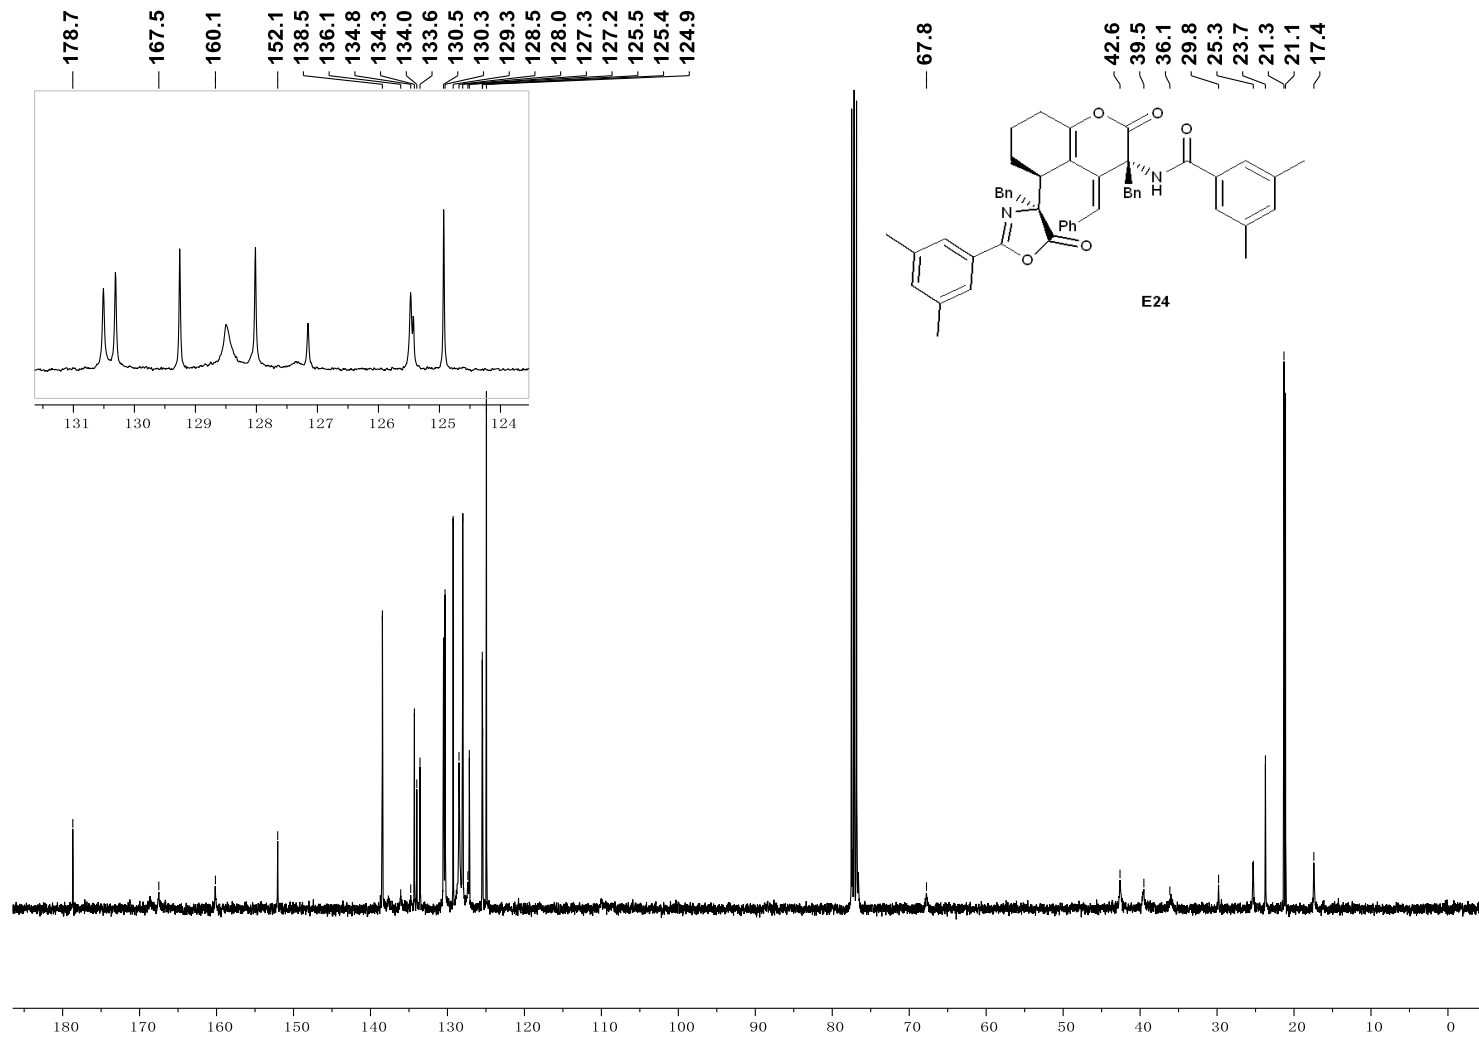



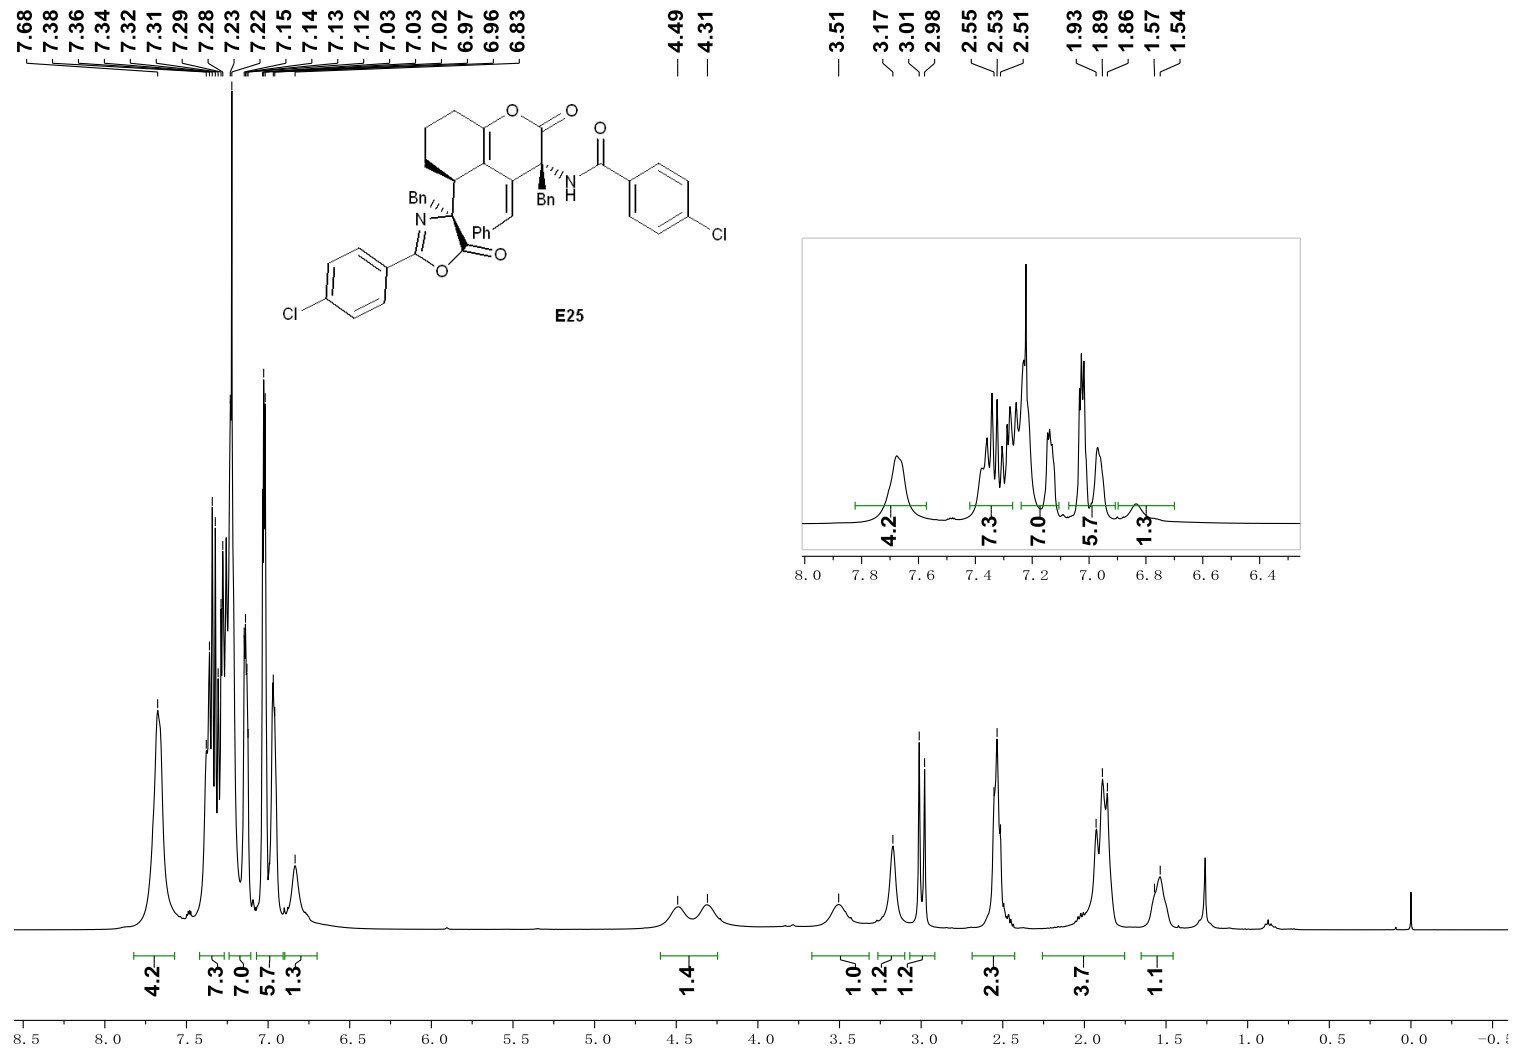

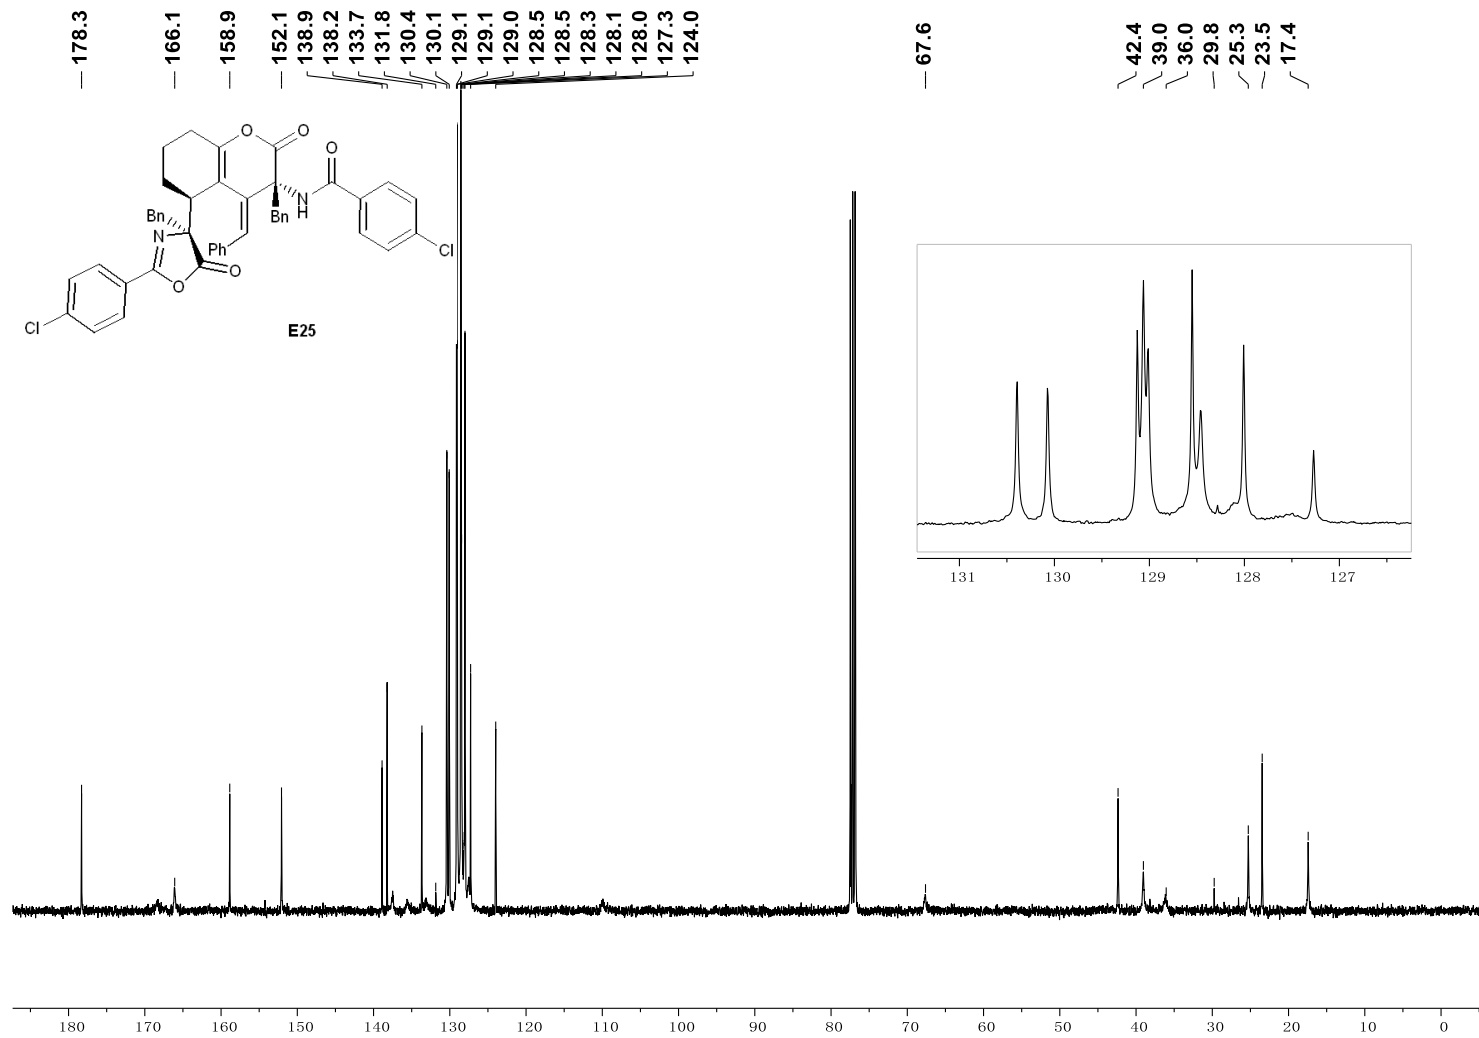

7.71  
7.69  
7.64  
7.62  
7.50  
7.48  
7.47  
7.46  
7.45  
7.42  
7.39  
7.38  
7.37  
7.36  
7.34  
7.21  
7.14  
7.13  
7.08  
7.06  
7.05  
7.05  
7.04  
7.03  
7.02  
7.01  
7.00  
6.97  
6.96  
6.95  
6.94  
6.93  
6.92  
6.89  
6.48  
3.85  
3.52  
3.51  
3.50  
3.18  
3.15  
2.93  
2.90  
2.88  
2.86  
2.83  
2.57  
2.55  
2.54  
2.52  
2.51  
2.50  
2.25  
2.22  
2.19  
2.17  
1.26

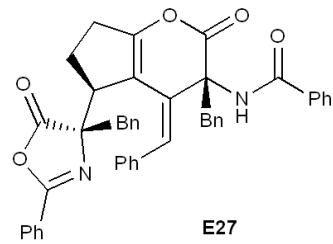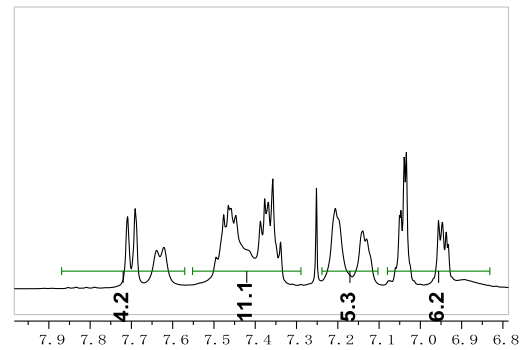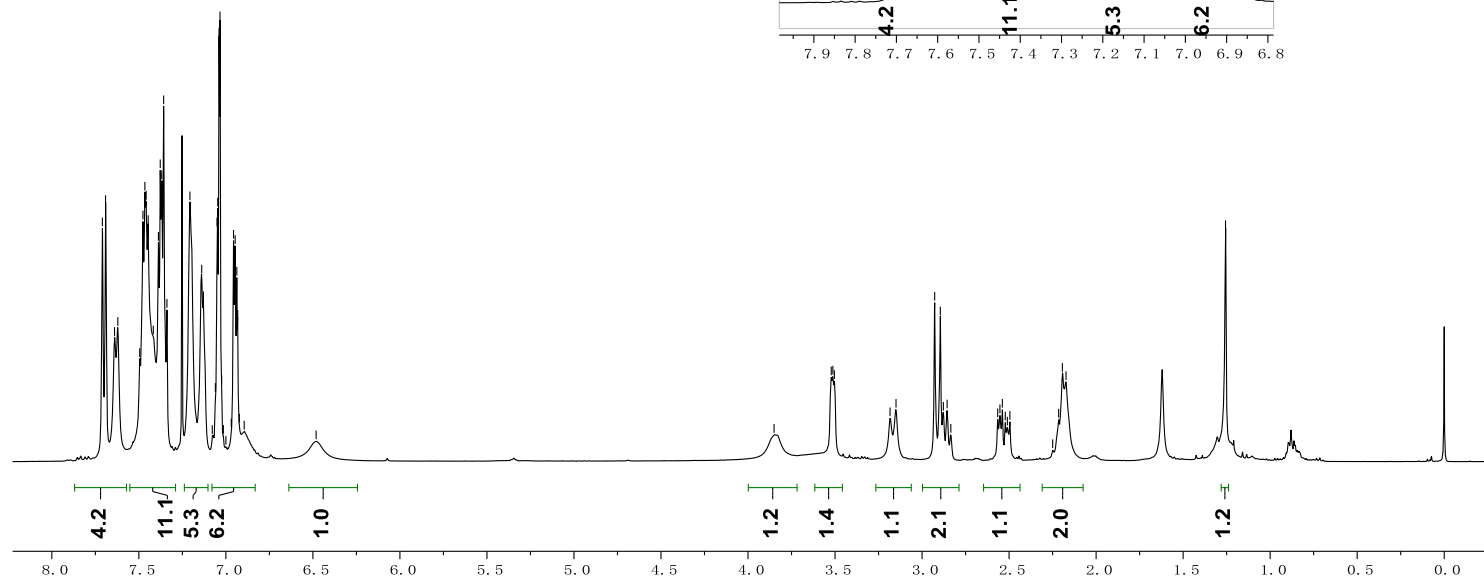

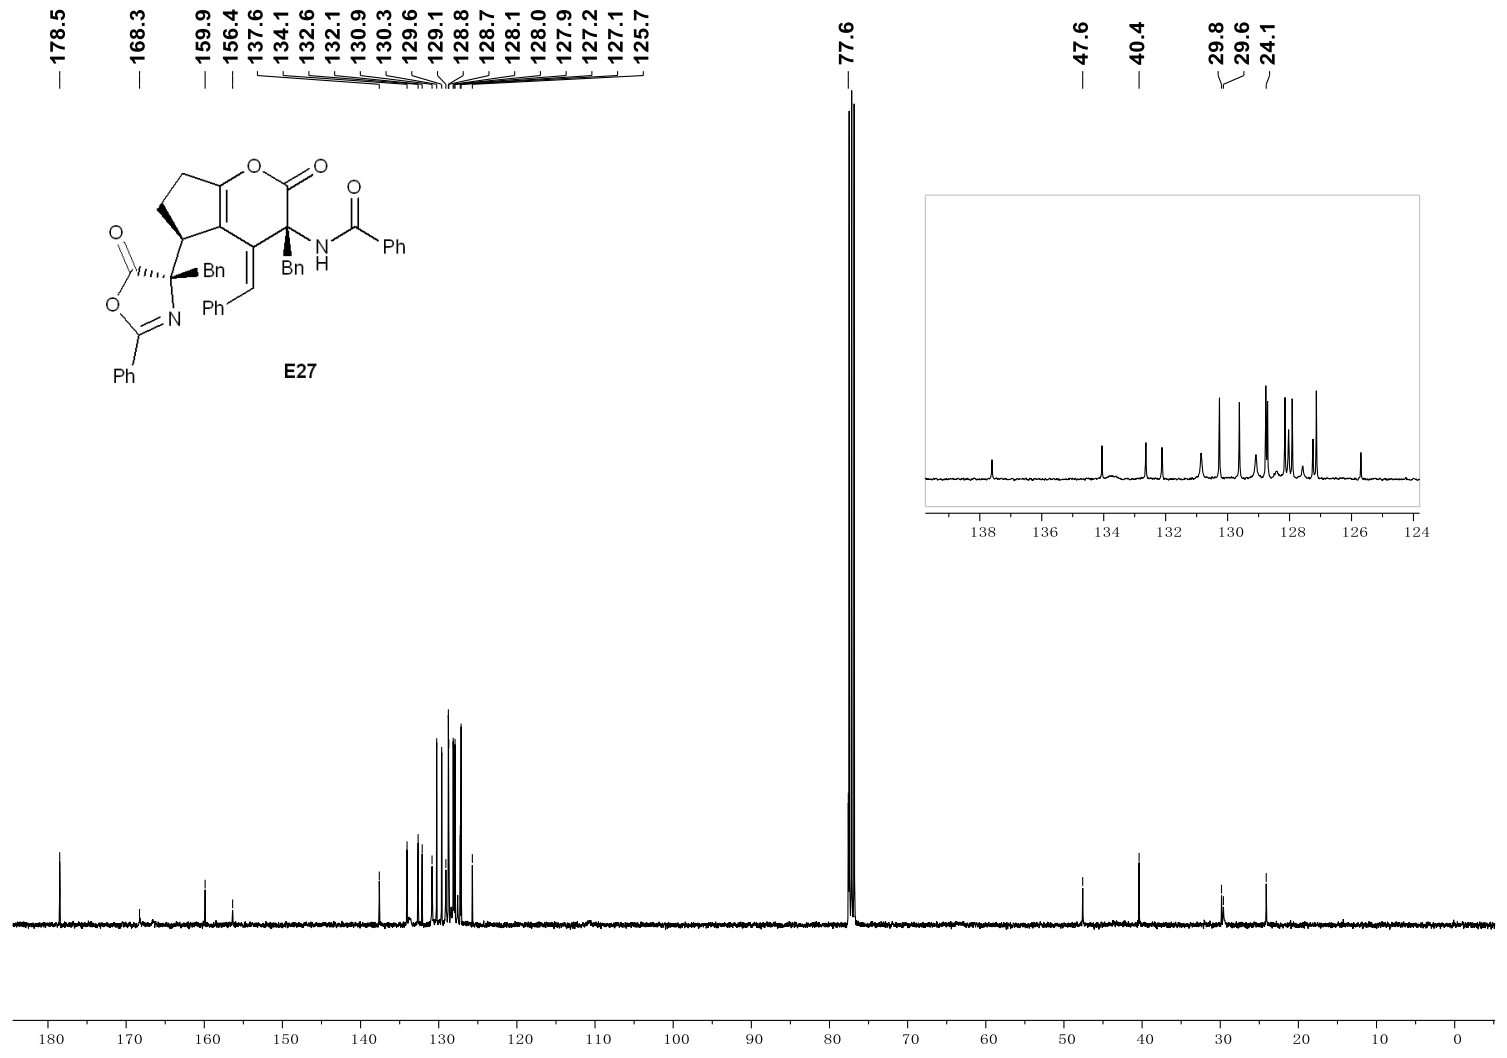

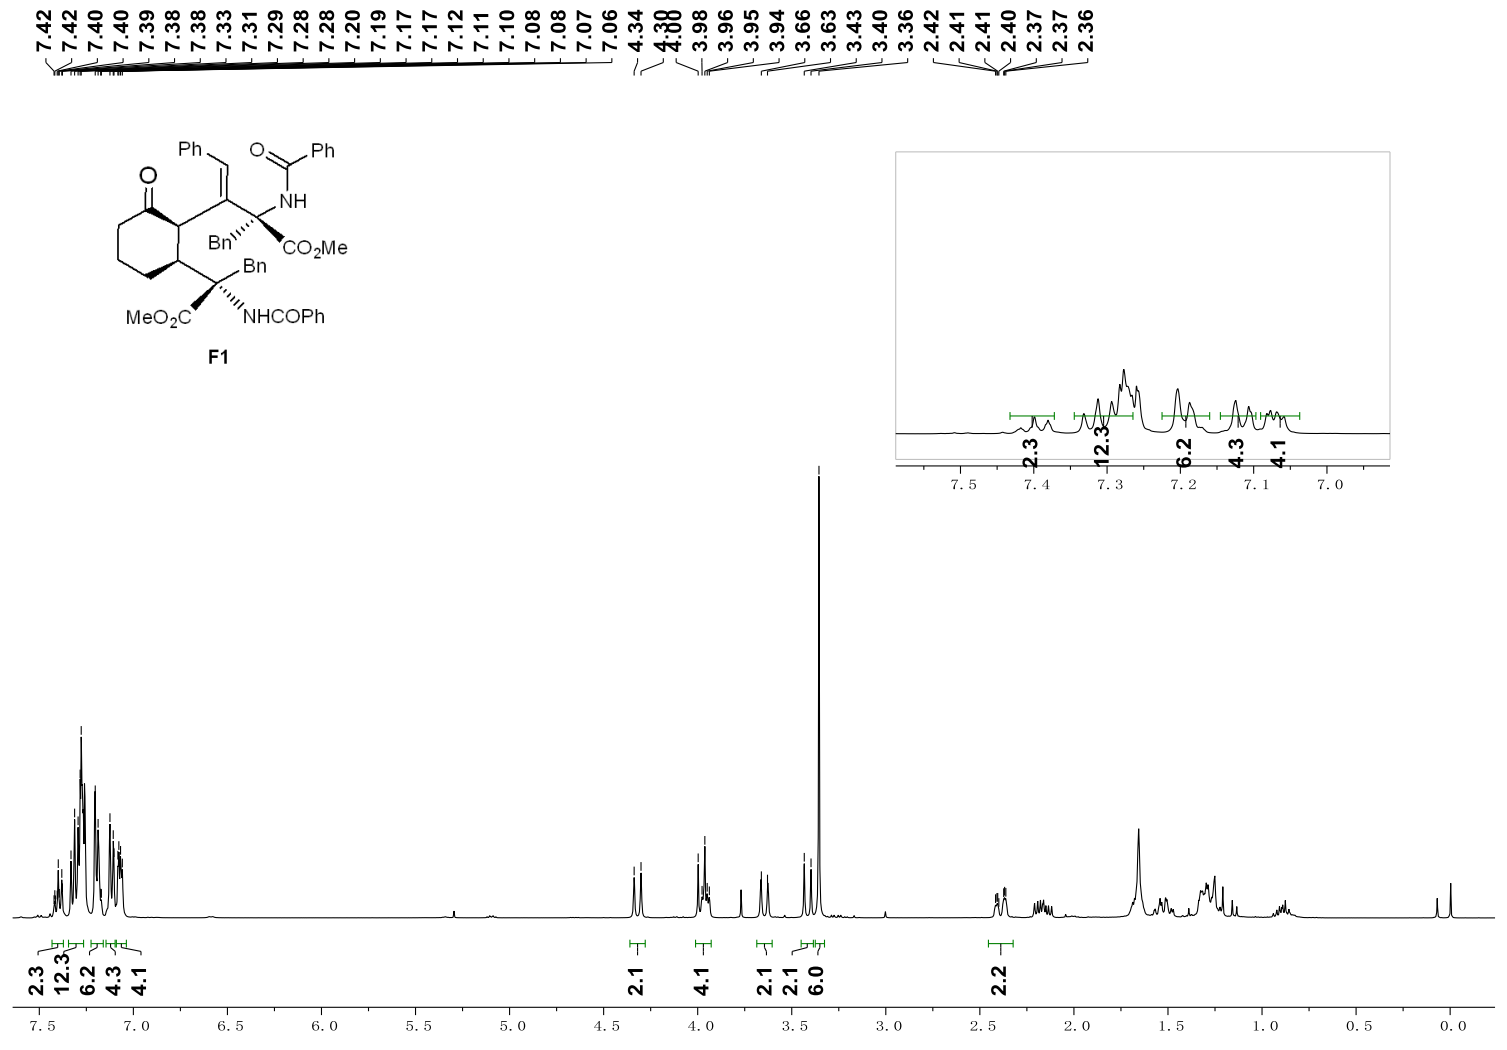

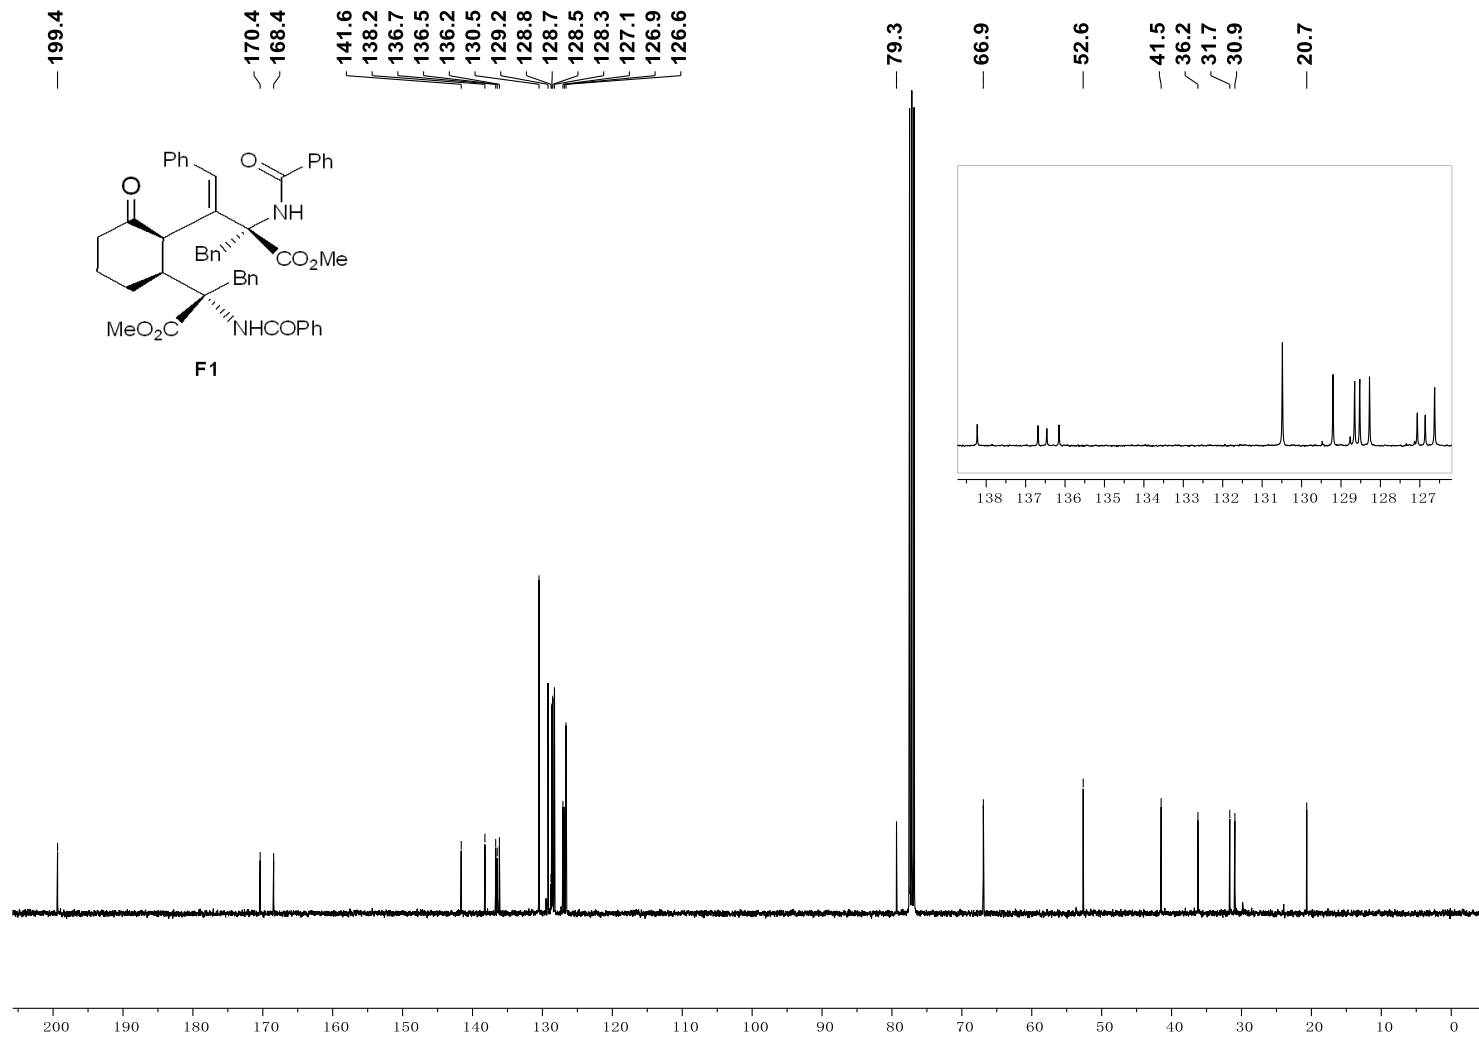

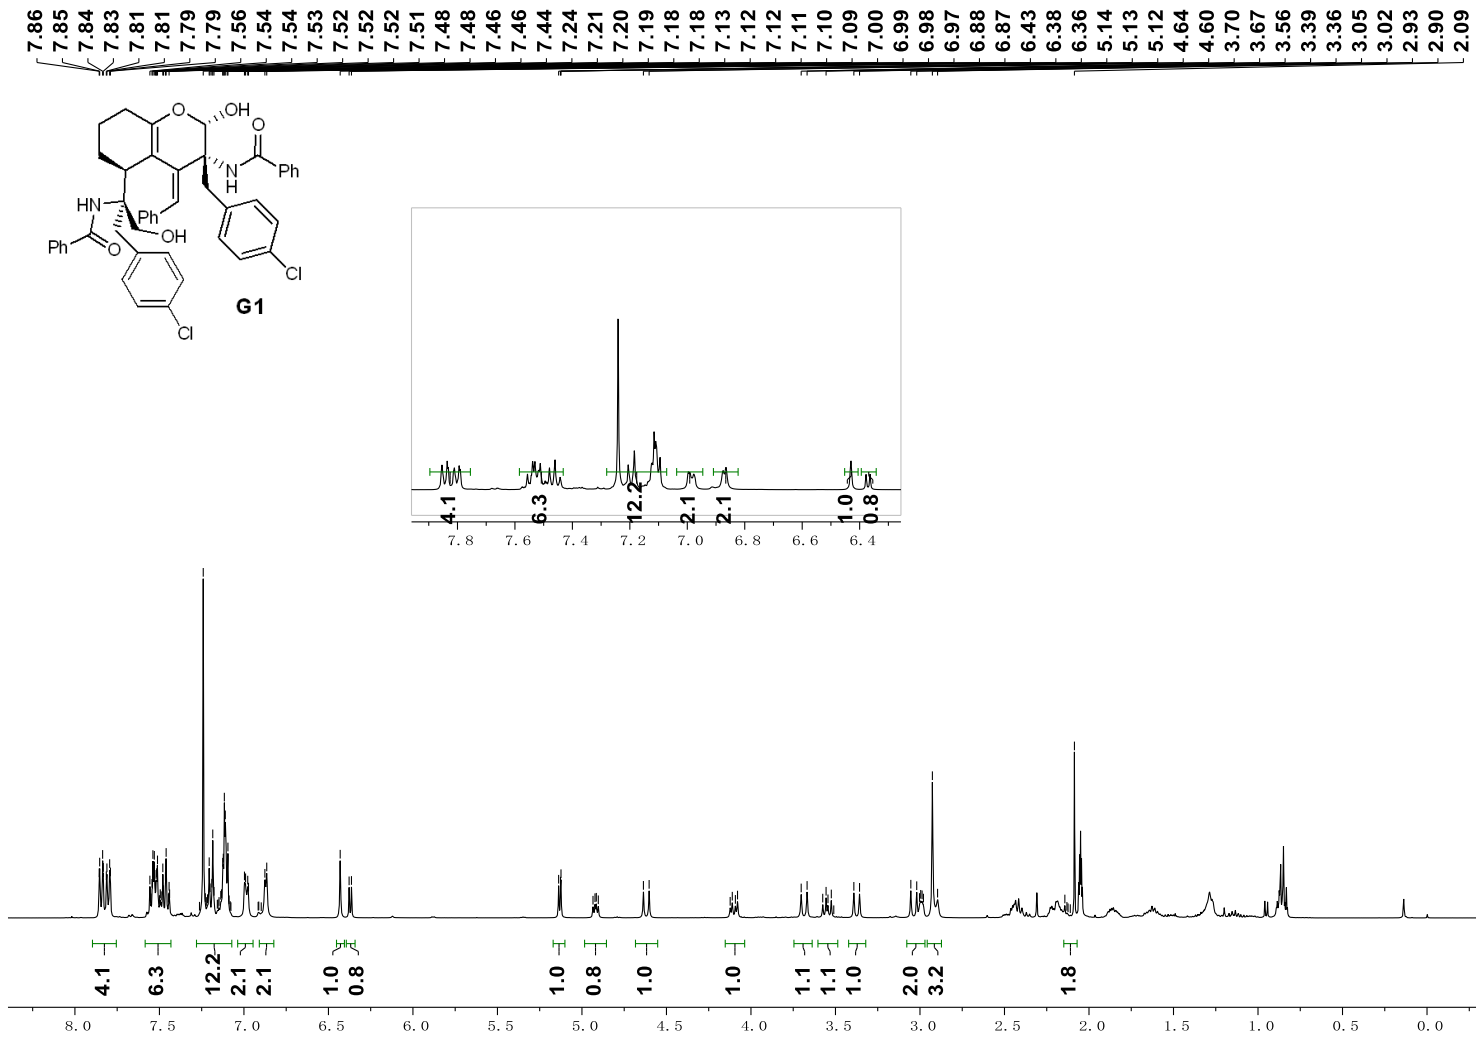

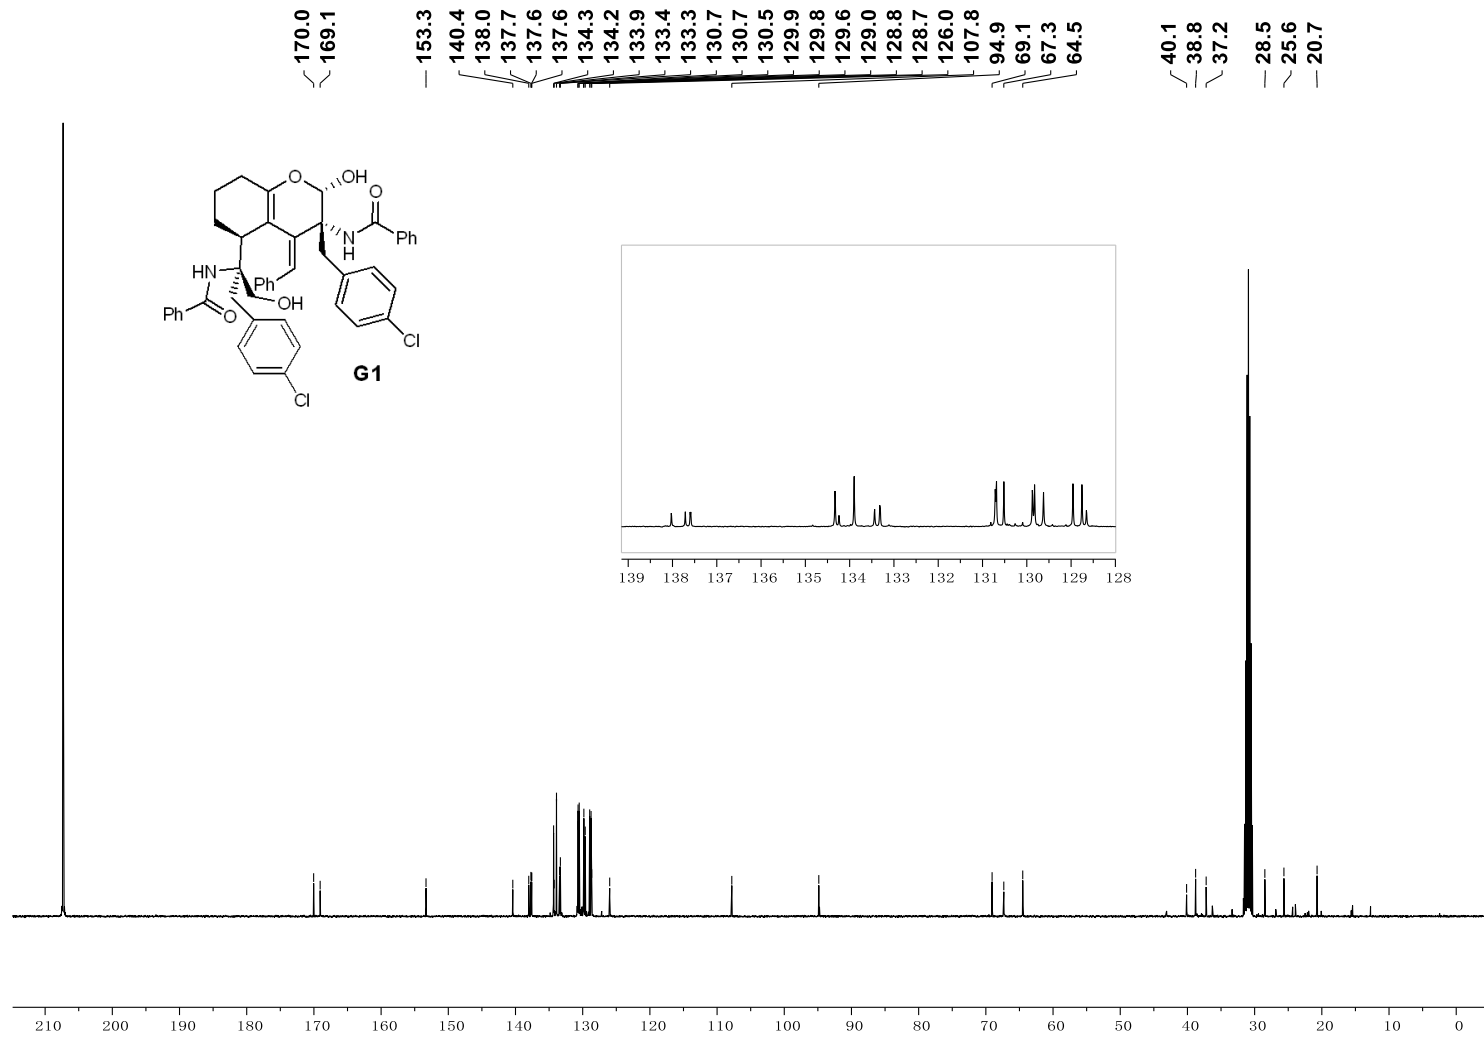

Supplement: d4qo00374h1.pdf [file d4qo00374h1.pdf]
